# Supplementary material for: Early Mechanisms of Chemoresistance in Retinoblastoma
Source: MDPI journal article supplement (doi:10.3390/cancers14194966), 2022-10-10
Supplement: s1 [file s1]

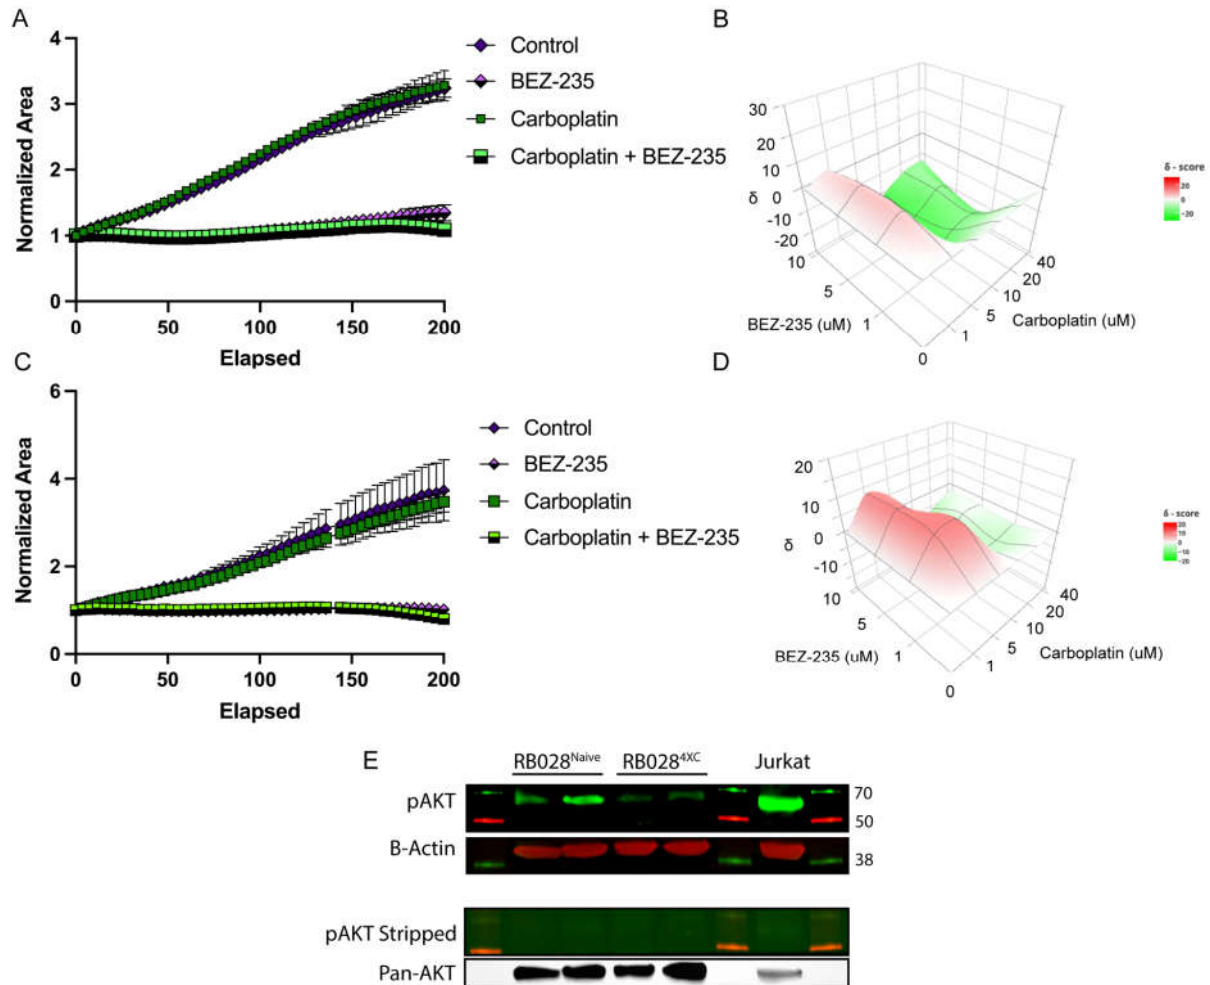

**Figure S5.** Effects of PI3K/AKT in carboplatin chemoresistance in retinoblastoma. **(A)** Normalized viability of RB028<sup>4xC</sup> cells monitored over 10 days after challenge with carboplatin (1uM) along with BEZ-235 (1uM). **(B)** 3D synergy map of RB028<sup>4xC</sup> using Bliss scores. **(C)** Normalized viability of RB006 cells monitored over 10 days after challenge with carboplatin (1uM) along with BEZ-235 (1uM). **(D)** 3D synergy map of RB006 using Bliss scores. **(E)** Western blot of pan-AKT and phosphorylated Akt (pAKT) in RB028<sup>Naive</sup> and RB028<sup>4xC</sup>. Jurkat cells were used as a control sample.
