# Supplementary material for: Early Mechanisms of Chemoresistance in Retinoblastoma
Source: MDPI journal article supplement (doi:10.3390/cancers14194966), 2022-10-10
Supplement: s1 [file s1]

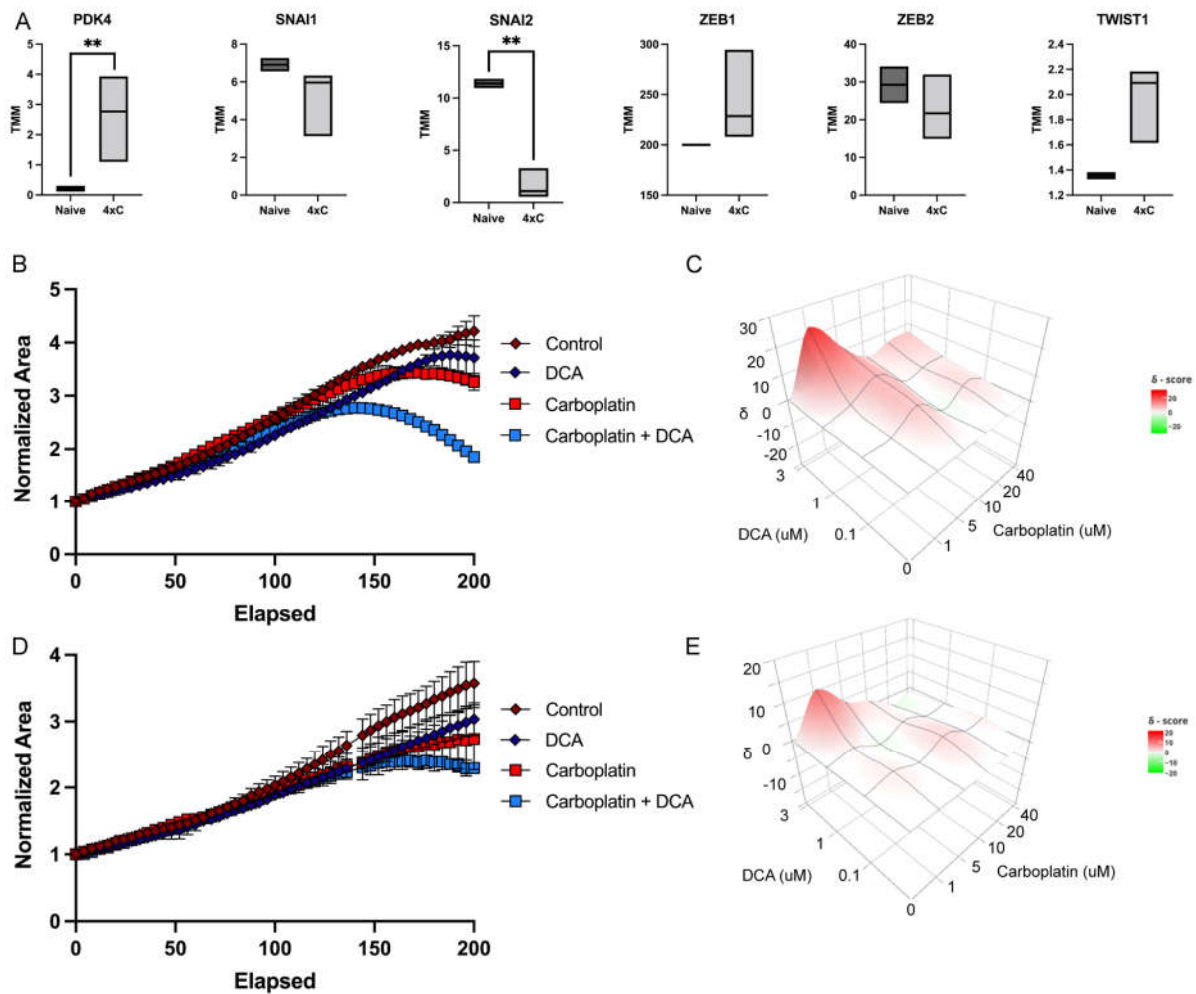

**Figure S3.** Effects of DCA in carboplatin chemoresistance in retinoblastoma. **(A)** Expression of key EMT transcription factors from RNAseq. **(B)** Normalized viability of RB028<sup>4xC</sup> cells monitored over one week after challenge with carboplatin (1  $\mu$ M) along with DCA (3  $\mu$ M). **(C)** 3D synergy map of RB028<sup>4xC</sup> using Bliss scores. **(D)** Normalized viability of RB006 cells monitored over one week after challenge with carboplatin (1  $\mu$ M) along with DCA (3  $\mu$ M). **(E)** 3D synergy map of RB006 using Bliss scores.
