# Supplementary material for: Early Mechanisms of Chemoresistance in Retinoblastoma
Source: MDPI journal article supplement (doi:10.3390/cancers14194966), 2022-10-10
Supplement: s1 [file s1]

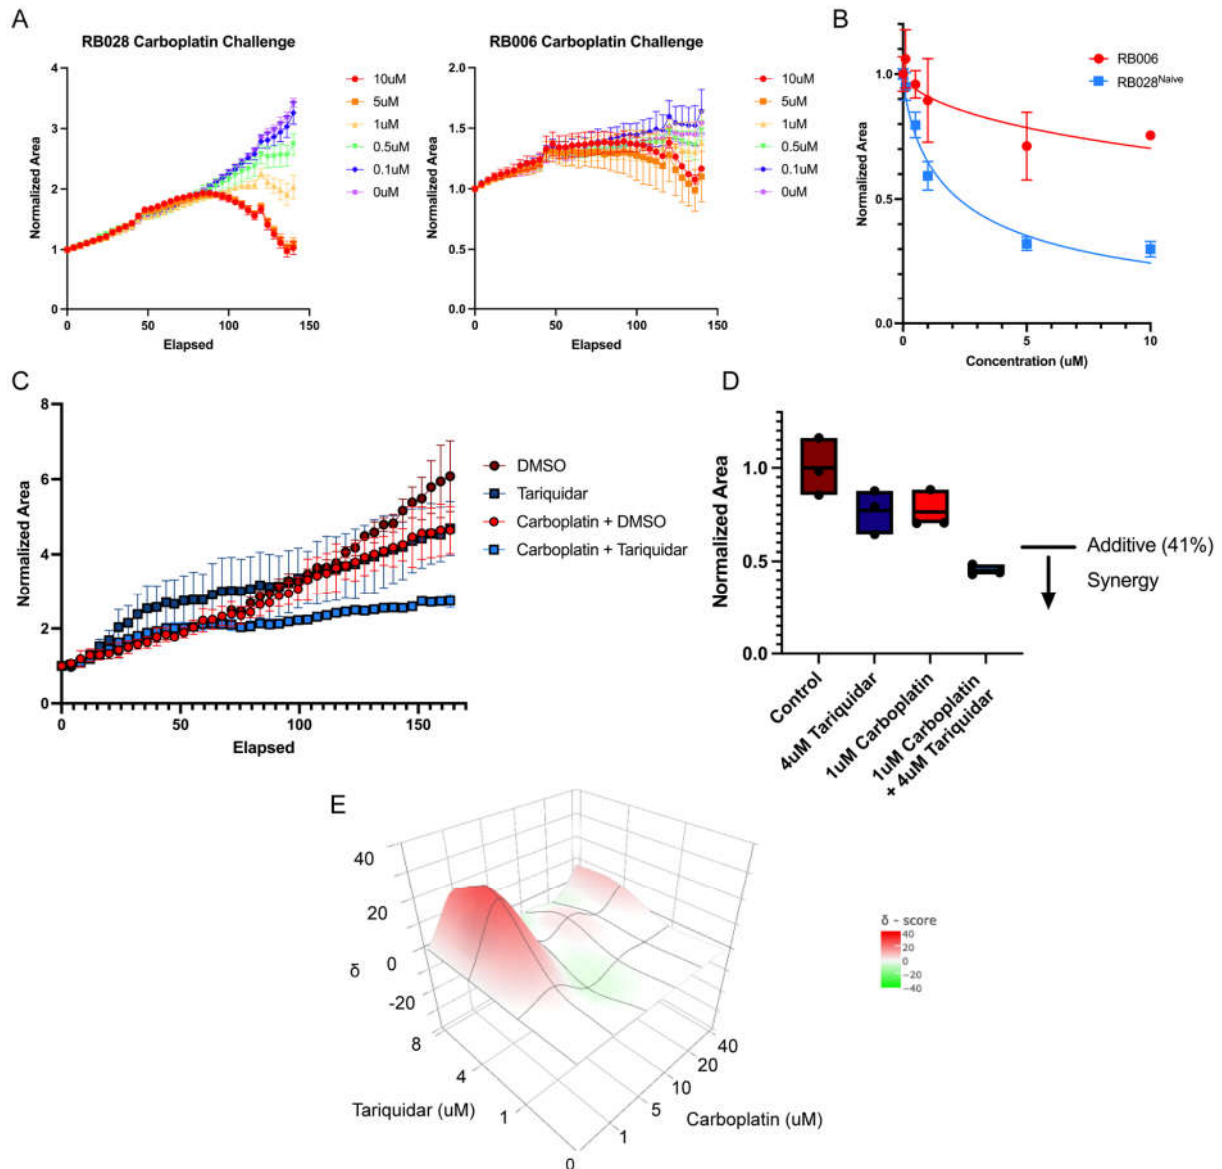

**Figure S4.** Carboplatin resistance potentiated by ABCB1 inhibitor tariquidar in RB006. **(A)** Carboplatin challenge of RB006 and RB028<sup>Naive</sup> over one week. **(B)** Representative kill curve at Hour 140 for carboplatin challenge demonstrates greater carboplatin resistance for RB006 compared to RB028<sup>Naive</sup> ( $EC_{50}$  for RB028<sup>Naive</sup> ~2.26  $\mu$ M;  $EC_{50}$  for RB006 ~39.04  $\mu$ M). **(C)** Normalized viability of RB006 cells monitored over 1 week after challenge with carboplatin (1  $\mu$ M) along with tariquidar (4  $\mu$ M). **(D)** Normalized viability of RB006 cells at the 150 hour time point from panel C for the indicated treatment groups (Bliss score = 41.0%, observed inhibition = 55.8%, excess over Bliss score = 13.8%). **(E)** 3D synergy map of RB006 using Bliss scores.
