# Supplementary material for: Early Mechanisms of Chemoresistance in Retinoblastoma
Source: MDPI journal article supplement (doi:10.3390/cancers14194966), 2022-10-10
Supplement: s1 [file s1]

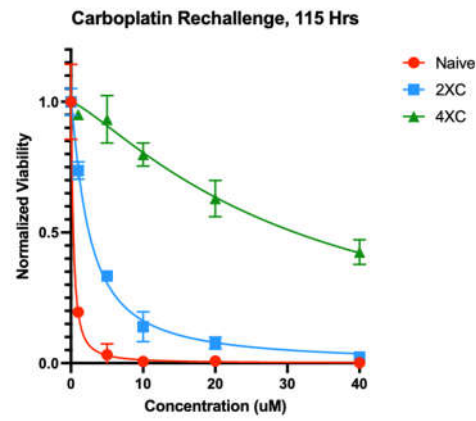

**Figure S1.** Carboplatin challenge performed at earlier passages demonstrates repeated sublethal carboplatin exposure induces chemoresistance in RB028 ( $\text{EC}_{50}$  for RB028<sup>Naive</sup>  $\sim 0.3316 \mu\text{M}$ ;  $\text{EC}_{50}$  for RB028<sup>2xC</sup>  $\sim 2.508 \mu\text{M}$ ;  $\text{EC}_{50}$  for RB028<sup>4xC</sup>  $\sim 31.10 \mu\text{M}$ ).
