# Supplementary material for: Early Mechanisms of Chemoresistance in Retinoblastoma
Source: Cancers (Basel). 2022 Oct 10;14(19):4966. doi: 10.3390/cancers14194966 (PMC9563111; doi:10.3390/cancers14194966)
Supplement: Supplementary file 1 [file cancers-14-04966-s001.zip]

Archive with 10 entries (10 files):
- Figure S1_CarboplatinRechallenge.pdf
- Figure S2_BarcodeDiversity.pdf
- Figure S3_DCA.pdf
- Figure S4_RB006Tariquidar_164.pdf
- Figure S5_PI3KAkt.pdf
- Table S1_4xCvNaive_DEGs.xlsx
- Table S2_GSEA.xlsx
- Table S3_Samp3vSamp1_DEandGO.xlsx
- Table S4_metascape_result.xlsx
- Table S5_qPCRoligos.xlsx
