# Supplementary material for: Early Mechanisms of Chemoresistance in Retinoblastoma
Source: Cancers (Basel). 2022 Oct 10;14(19):4966. doi: 10.3390/cancers14194966 (PMC9563111; doi:10.3390/cancers14194966)
Supplement: Supplementary file 1 [file cancers-14-04966-s001.zip › Table S1_4xCvNaive_DEGs.xlsx]

## Sheet: Table S1_4xCvNaive_DEGs
ENSEMBL	SYMBOLS	ENTREZ	logFC	logCPM	F	PValue	FDR	RB028.4XC.1	RB028.4XC.3	RB028.4XC.4	RB028.Naive.1	RB028.Naive.3
ENSG00000276168.1	RN7SL1	6029	-1.2475	14.6111	23.4478	0.000444463	0.00790211	19855.7	11982.8	16607.8	40430.7	36253
ENSG00000204628.12	RACK1	10399	-0.664412	11.2348	9.78017	0.00906826	0.0451375	1882.31	1636.13	2340.63	3226.1	2964.56
ENSG00000113328.19	CCNG1	900	0.409019	9.80129	2.52143	0.139177	0.281097	1015.46	669.545	1284.92	687.922	803.145
ENSG00000087302.9	RTRAF	51637	0.22528	7.60603	1.52513	0.241276	0.407979	197.314	182.868	240.014	179.456	174.172
ENSG00000109320.13	NFKB1	4790	-0.244715	3.23065	1.08126	0.319607	0.492436	7.54017	8.97314	9.5001	9.64736	10.881
ENSG00000145335.16	SNCA	6622	4.50231	3.31785	161.023	3.73437e-08	4.46606e-05	14.0801	13.0164	21.3479	0.653407	0.758257
ENSG00000181350.12	LRRC75A	388341	-0.103212	3.21709	0.179955	0.679173	0.796164	8.04029	10.5337	8.24434	8.87865	10.3502
ENSG00000235760.4	MSH2-OT1	644093	-0.55892	3.2113	5.27482	0.0411353	0.123049	6.92465	9.07954	7.09777	12.4147	10.3123
ENSG00000241839.10	PLEKHO2	80301	-0.6949	3.22391	9.35892	0.0102712	0.0489779	7.117	7.02246	8.13514	12.0304	11.9805
ENSG00000171757.17	LRRC34	151827	0.251589	3.2174	0.896162	0.363118	0.536792	8.34805	12.2716	8.89952	7.14904	9.40238
ENSG00000235109.7	ZSCAN31	64288	0.0860448	3.20469	0.0958685	0.762337	0.855532	8.23264	12.378	7.37076	7.95619	9.66777
ENSG00000099860.9	GADD45B	4616	-1.22252	3.21696	11.6671	0.00536062	0.0323797	7.19394	3.8659	6.98858	8.68647	19.2976
ENSG00000119227.8	PIGZ	80235	-0.754871	3.20094	9.41641	0.0100964	0.0484941	7.00159	8.40567	5.95121	13.0681	11.0326
ENSG00000011201.12	ANOS1	3730	0.537874	3.26267	3.86777	0.0736076	0.182013	11.2333	7.98007	13.5404	6.9953	7.99961
ENSG00000182054.9	IDH2	3418	-0.223056	7.59277	1.52161	0.241789	0.408554	160.575	171.341	210.749	208.514	213.677
ENSG00000013392.8	RWDD2A	112611	-0.196418	3.21731	0.741099	0.406752	0.577322	8.46346	9.29234	8.35353	9.53205	10.426
ENSG00000113838.13	TBCCD1	55171	0.41293	3.21381	2.91535	0.114339	0.246174	10.5409	11.3849	8.68112	7.99462	7.35509
ENSG00000013288.9	MAN2B2	23324	-0.161023	3.19572	0.383411	0.547753	0.696001	9.61757	9.85981	6.44259	9.07082	10.3123
ENSG00000139597.18	N4BP2L1	90634	0.56266	3.25285	2.54739	0.137344	0.278747	14.3109	6.02938	12.3392	5.9191	8.79578
ENSG00000237289.9	CKMT1B	1159	0.169847	3.22003	0.497088	0.494697	0.653777	9.00204	10.4982	9.5001	9.6858	7.50674
ENSG00000073711.11	PPP2R3A	5523	0.0543977	3.23755	0.0476452	0.831006	0.900587	9.9638	7.55446	11.0288	9.41675	8.8716
ENSG00000196476.12	C20orf96	140680	-0.491323	3.21216	3.94672	0.0711031	0.178046	7.84793	7.87366	7.97135	13.2219	8.98534
ENSG00000178449.9	COX14	84987	-0.381627	3.21938	2.50429	0.140405	0.282812	9.15592	6.77419	8.79032	10.3008	11.1464
ENSG00000116254.18	CHD5	7485	0.536473	3.27591	1.40151	0.260165	0.428371	14.3109	3.79496	15.0145	7.26435	7.88587
ENSG00000188483.8	IER5L	389792	-1.13764	3.22599	12.0409	0.00485791	0.0303703	6.23218	3.7595	8.89952	15.9508	11.5634
ENSG00000108387.15	SEPTIN4	5414	-0.0944284	7.55343	0.159807	0.696598	0.808414	150.842	251.39	146.105	190.065	200.331
ENSG00000249853.7	HS3ST5	64711	-0.141127	3.18166	0.187236	0.673163	0.792068	6.61689	13.0518	6.115	8.95552	10.0848
ENSG00000103707.10	MTFMT	123263	-0.0410554	3.18946	0.0227989	0.882575	0.930839	10.0407	10.2854	6.388	8.26367	10.1227
ENSG00000130244.12	FAM98C	147965	-0.282616	3.22185	1.37375	0.26468	0.433972	7.73252	8.01553	9.82769	11.377	9.32656
ENSG00000116678.19	LEPR	3953	0.336796	3.24838	0.671317	0.429107	0.596886	14.6187	4.22057	12.1208	7.68714	8.60621
ENSG00000117305.15	HMGCL	3155	-0.366855	3.19109	2.06966	0.176687	0.331235	9.9638	7.80273	6.49719	9.8011	11.1085
ENSG00000120690.16	ELF1	1997	0.293496	3.21808	1.45442	0.251845	0.419289	11.5411	8.4766	9.88228	7.91775	8.34082
ENSG00000160993.4	ALKBH4	54784	-0.638497	3.18433	6.13354	0.0297521	0.0979667	7.69405	8.3702	5.95121	9.64736	13.2695
ENSG00000027847.14	B4GALT7	11285	-0.650611	3.16776	3.7521	0.0774745	0.188449	10.0023	7.76726	3.82188	11.1464	11.6013
ENSG00000182325.11	FBXL6	26233	-1.43374	3.19231	31.1083	0.000136428	0.00398596	6.30912	4.00777	5.84201	14.644	14.4069
ENSG00000065357.20	DGKA	1606	0.342465	3.20583	2.13447	0.170574	0.323186	11.0025	9.89528	9.06331	7.91775	7.84796
ENSG00000166025.18	AMOTL1	154810	-0.271287	7.58267	2.57746	0.135258	0.276229	163.383	176.129	191.421	219.007	208.141
ENSG00000196659.10	TTC30B	92104	-0.426978	3.18482	2.87074	0.116857	0.249371	8.19417	9.04407	6.44259	9.33987	11.9425
ENSG00000144290.17	SLC4A10	57282	0.483198	3.21646	4.02917	0.0685975	0.174122	11.8488	9.11501	10.2645	7.61027	7.27926
ENSG00000077454.16	LRCH4	4034	-0.0537783	3.22166	0.03636	0.852071	0.912936	10.5793	6.49045	10.3191	10.9542	7.9617
ENSG00000135083.15	CCNJL	79616	-1.62886	3.16286	23.131	0.000469354	0.00816658	3.07762	7.51899	3.76728	15.3358	14.4827
ENSG00000175287.19	PHYHD1	254295	-0.606418	3.19919	6.97803	0.0220457	0.0804961	6.77077	7.7318	8.08054	11.6845	11.2222
ENSG00000119138.4	KLF9	687	0.80842	3.27238	4.35297	0.0597384	0.158364	13.0414	5.42644	16.4887	6.22658	7.01387
ENSG00000228340.6	MIR646HG	284757	-0.0257047	3.17683	0.00739405	0.932942	0.962148	7.69405	12.2361	6.66099	10.4161	7.69631
ENSG00000249158.6	PCDHA11	56138	-0.500293	3.18852	4.64274	0.0529616	0.145762	7.27088	8.72487	7.20697	10.8773	11.0326
ENSG00000152464.15	RPP38	10557	0.00603796	3.18971	0.000584157	0.981128	0.989889	9.88686	9.54061	7.69835	7.76401	10.2744
ENSG00000213057.5	C1orf220	400798	0.519028	3.18538	3.94445	0.0711735	0.178178	10.1946	12.4844	8.02594	7.41809	6.90014
ENSG00000198586.14	TLK1	9874	0.639735	7.60305	12.509	0.00430468	0.0283694	199.007	231.493	250.115	152.59	138.609
ENSG00000174599.5	TRAM1L1	133022	-0.193734	3.17885	0.483276	0.500632	0.658467	10.1562	8.72487	6.49719	7.76401	11.6392
ENSG00000248019.3	FAM13A-AS1	285512	0.0218552	3.17481	0.00570469	0.941081	0.966566	10.2716	10.3564	6.2788	10.4545	7.27926
ENSG00000069974.16	RAB27A	5873	0.422784	3.20467	3.32815	0.0939512	0.21591	9.88686	10.4982	10.1553	7.14904	8.03752
ENSG00000267470.6	ZNF571-AS1	100507433	0.30198	3.17389	1.16058	0.303241	0.47497	9.5791	12.4134	6.93398	8.30211	7.393
ENSG00000175213.3	ZNF408	79797	-0.34416	3.21043	1.67018	0.221387	0.385461	8.9251	6.10032	9.88228	9.53205	11.4876
ENSG00000181754.7	AMIGO1	57463	-0.509368	3.17167	4.13272	0.0656007	0.168961	8.1557	8.76034	5.89661	11.031	10.6914
ENSG00000185818.8	NAT8L	339983	-0.318189	3.18405	1.4183	0.257484	0.425166	10.6563	7.05792	6.82478	11.031	9.40238
ENSG00000174007.8	CEP19	84984	0.260696	3.15377	0.512598	0.48818	0.648942	7.57864	14.9671	5.62362	7.30278	8.45456
ENSG00000174788.10	PCP2	649	-1.03484	3.13617	3.01351	0.10903	0.238204	1.8081	13.0518	3.33049	9.33987	15.7717
ENSG00000174939.11	ASPHD1	253982	-0.752356	3.18708	9.25655	0.0105915	0.0498018	8.27111	5.81658	7.15237	10.9542	12.8904
ENSG00000184575.12	XPOT	11260	0.573205	7.6252	7.06522	0.0213943	0.0790672	201.161	187.266	293.193	149.323	156.011
ENSG00000145888.10	GLRA1	2741	2.69036	3.21514	82.3868	1.30277e-06	0.000265573	11.0025	17.2369	13.595	2.26771	2.04729
ENSG00000164853.9	UNCX	340260	-0.534246	3.25006	1.3817	0.263376	0.432545	6.88618	3.15656	14.1955	12.9913	10.1606
ENSG00000204044.6	SLC12A5-AS1	109729184	-0.736909	3.16695	8.76791	0.0122932	0.0547501	7.54017	7.98007	5.45983	11.377	12.0184
ENSG00000244627.5	TPTEP2	400927	0.219664	3.17596	0.724533	0.411889	0.581767	9.34827	11.5268	7.53456	8.6096	7.69631
ENSG00000156475.18	PPP2R2B	5521	1.04233	3.25526	10.4952	0.00738623	0.0394395	12.4644	7.37713	16.1611	5.95753	5.64901
ENSG00000233966.1	UBE2SP1	246719	0.942057	3.25846	8.79289	0.0121987	0.0544903	11.0025	7.76726	16.7071	6.14971	6.10397
ENSG00000160256.13	FAM207A	85395	-0.791677	3.17971	11.0775	0.00628422	0.0357995	7.69405	6.24218	6.87938	13.2219	10.8052
ENSG00000106397.12	PLOD3	8985	-0.650487	3.17636	7.23149	0.0202145	0.0760285	8.19417	6.88059	6.77018	12.876	10.009
ENSG00000105810.9	CDK6	1021	0.38843	3.18948	2.32607	0.154015	0.301263	12.272	8.72487	8.95411	7.22591	8.03752
ENSG00000156384.14	SFR1	119392	0.53852	3.17097	4.11512	0.0660985	0.169828	10.8871	11.9878	7.64376	6.68781	7.35509
ENSG00000157106.16	SMG1	23049	-0.0728499	7.59577	0.126638	0.728332	0.832253	183.696	164.673	220.031	233.074	165.414
ENSG00000175984.15	DENND2C	163259	-0.453864	3.18178	4.03249	0.0684987	0.173977	7.73252	7.8382	7.91675	10.3392	11.1085
ENSG00000092871.16	RFFL	117584	0.509686	3.18674	4.39601	0.058668	0.156288	9.80992	11.4204	9.5001	7.91775	6.48309
ENSG00000163644.15	PPM1K	152926	2.744	3.21184	90.9785	7.80561e-07	0.000208992	17.1577	12.1652	12.5576	2.1524	2.00938
ENSG00000270344.3	POC1B-AS1	109729146	0.539175	3.17132	4.02988	0.0685764	0.1741	9.42522	12.9809	8.13514	6.68781	7.35509
ENSG00000164056.11	SPRY1	10252	0.374645	3.2272	1.48562	0.247106	0.414245	7.65558	9.07954	14.0863	9.41675	6.36936
ENSG00000213366.13	GSTM2	2946	-0.53652	3.18381	5.03342	0.045234	0.131091	7.34782	7.19979	8.35353	12.4532	9.66777
ENSG00000169047.5	IRS1	3667	-0.52059	3.17851	5.2901	0.0408914	0.122443	7.54017	7.41259	7.97135	11.2232	10.6914
ENSG00000204241.8	LINC02731	100128239	-0.304693	3.20915	0.783316	0.394106	0.56559	8.73275	5.53285	10.9742	13.76	6.93805
ENSG00000228203.7	RNF144A-AS1	386597	-0.586585	3.14776	4.06075	0.0676662	0.172546	6.69383	10.0371	5.07764	10.7236	11.2222
ENSG00000105619.13	TFPT	29844	-0.349834	3.18171	2.23895	0.161278	0.311092	7.19394	8.33473	8.79032	9.8011	10.8431
ENSG00000198722.14	UNC13B	10497	-0.359056	7.58019	4.44715	0.0574266	0.154172	160.998	164.992	189.62	226.694	214.132
ENSG00000184857.8	TMEM186	25880	-0.355485	3.14148	1.17391	0.300608	0.471902	9.77145	9.39874	4.25866	9.33987	10.7672
ENSG00000196118.12	CCDC189	90835	-0.327891	3.16392	1.81348	0.203815	0.365954	8.57887	8.76034	6.77018	9.18613	11.0326
ENSG00000166311.10	SMPD1	6609	-0.401595	3.16488	2.3266	0.153973	0.301235	10.1177	6.95152	6.49719	9.72423	11.0705
ENSG00000087253.13	LPCAT2	54947	1.21226	3.1995	22.1583	0.000556675	0.00901998	13.9647	10.0017	11.4656	4.8429	5.34571
ENSG00000089876.12	DHX32	55760	0.0115048	3.16678	0.00232422	0.962369	0.979354	9.42522	9.71795	7.58916	8.87865	8.83369
ENSG00000109066.14	TMEM104	54868	-0.207207	3.16198	0.684828	0.424628	0.593302	9.88686	8.44114	6.66099	9.83954	9.4403
ENSG00000130304.17	SLC27A1	376497	-0.271947	3.19464	1.17483	0.300428	0.47182	8.30958	6.73872	10.1553	10.0702	10.1606
ENSG00000184182.18	UBE2F	140739	-0.847771	3.14859	10.3407	0.00771616	0.0405686	6.03983	8.583	5.24143	11.7998	12.1321
ENSG00000265763.4	ZNF488	118738	-0.52582	3.15612	4.45134	0.0573263	0.153972	8.46346	8.08647	5.89661	11.3385	10.2744
ENSG00000053108.17	FSTL4	23105	0.101211	3.21115	0.133428	0.721478	0.827214	7.57864	8.19287	12.6668	9.45518	8.15126
ENSG00000181026.15	AEN	64782	0.318732	7.60425	2.29111	0.156879	0.305033	234.284	158.431	241.16	159.201	179.555
ENSG00000122386.10	ZNF205	7755	-0.853876	3.17509	10.6466	0.00707917	0.0384184	7.80946	4.96537	7.53456	11.5307	12.8904
ENSG00000168310.11	IRF2	3660	-0.105994	3.17089	0.202435	0.661056	0.783109	8.84816	9.07954	8.02594	10.2239	8.41665
ENSG00000105808.17	RASA4	10156	0.034569	3.17318	0.020119	0.889639	0.934929	8.04029	10.179	8.84492	7.87932	9.7436
ENSG00000146826.17	MAP11	55262	-1.0746	3.15933	18.1647	0.00118961	0.0133403	7.57864	5.00084	5.78742	13.1066	12.7008
ENSG00000023608.5	SNAPC1	6617	0.572094	3.16298	4.67398	0.0522879	0.144484	9.3098	12.8745	8.40813	7.14904	6.59683
ENSG00000154229.12	PRKCA	5578	-0.173699	3.16683	0.520766	0.484809	0.646235	7.5017	9.68248	8.18974	10.2239	8.8716
ENSG00000235363.1	SNRPGP10	100130289	0.51796	3.16194	3.26774	0.0966362	0.219939	8.04029	13.5484	8.62652	7.68714	6.40727
ENSG00000164007.11	CLDN19	149461	-1.2651	3.13342	18.2739	0.00116353	0.0131938	5.92442	6.66779	3.98567	10.147	16.5679
ENSG00000158716.9	DUSP23	54935	0.108203	3.12335	0.0836174	0.777557	0.865717	7.23241	14.2932	4.96844	7.87932	8.60621
ENSG00000135931.17	ARMC9	80210	-0.666363	3.14151	5.251	0.0415194	0.123498	5.23196	9.85981	6.06041	11.7229	10.7293
ENSG00000179051.14	RCC2	55920	-0.415063	7.56297	6.219	0.0288399	0.0960206	164.807	176.484	158.99	212.972	231.761
ENSG00000225377.6	NRSN2-AS1	100507459	-0.00739534	3.1526	0.000922095	0.976291	0.987744	9.00204	10.0017	7.31617	8.91708	8.75786
ENSG00000240356.6	RPL23AP7	118433	0.349592	3.15712	1.64467	0.224723	0.38901	12.3874	9.04407	7.53456	6.9953	8.18917
ENSG00000266904.6	LINC00663	284440	0.121092	3.1504	0.150421	0.705156	0.814959	13.2722	7.37713	6.55179	8.14837	8.5683
ENSG00000146856.14	AGBL3	340351	0.984317	3.19772	15.126	0.00228884	0.0197401	10.7717	10.2145	13.1582	5.15038	6.33144
ENSG00000214654.8	B3GNT10	100288842	0.0185456	3.133	0.00398226	0.950757	0.972522	9.23286	11.0657	5.78742	7.72557	9.51612
ENSG00000103024.7	NME3	4832	-1.80093	3.14505	34.004	9.23634e-05	0.00318636	5.42431	2.58909	5.18683	14.375	16.1509
ENSG00000157514.16	TSC22D3	1831	1.7841	3.2488	23.9433	0.000408571	0.00751496	13.7724	7.37713	18.6726	3.72826	3.94293
ENSG00000129480.13	DTD2	112487	0.181841	3.13282	0.316004	0.584719	0.726454	9.07898	11.846	6.3334	5.84223	10.2365
ENSG00000166896.9	ATP23	91419	0.135728	3.15307	0.326964	0.578365	0.721261	9.80992	9.61155	7.97135	8.53272	8.11335
ENSG00000185133.14	INPP5J	27124	-0.246995	3.16991	1.06417	0.323296	0.49616	8.5404	7.05792	9.3363	9.57049	10.1227
ENSG00000166441.13	RPL27A	6157	-0.148227	9.76316	0.610333	0.450314	0.615856	776.676	774.847	947.061	962.007	883.9
ENSG00000117519.16	CNN3	1266	-0.0988996	7.59676	0.257106	0.621617	0.754427	165.076	168.113	231.387	207.322	195.668
ENSG00000106333.13	PCOLCE	5118	0.18752	3.17213	0.539185	0.477353	0.639381	10.8486	7.58993	9.77309	9.07082	7.43092
ENSG00000144893.12	MED12L	116931	2.17915	3.23298	43.5758	2.98751e-05	0.00168376	13.2338	10.0017	17.6898	3.68983	2.31268
ENSG00000261008.7	LINC01572	101927957	0.117911	3.17118	0.238461	0.634421	0.763766	10.0407	7.87366	9.77309	8.99395	7.99961
ENSG00000150756.14	ATPSCKMT	134145	0.0880887	3.12857	0.0859151	0.774614	0.863835	8.61734	11.8814	6.00581	9.30144	7.393
ENSG00000183837.9	PNMA3	29944	-0.552063	3.14507	5.42903	0.0387501	0.117878	8.50193	6.95152	6.66099	10.8773	10.7672
ENSG00000145358.6	DDIT4L	115265	-0.096674	3.18726	0.116686	0.738766	0.840109	6.96312	7.55446	11.957	10.3008	8.49247
ENSG00000169918.9	OTUD7A	161725	-0.634386	3.1469	7.78839	0.0167891	0.067378	7.54017	6.95152	7.04317	11.3001	10.9947
ENSG00000187815.10	ZFP69	339559	-0.216699	3.12157	0.481996	0.501189	0.658813	7.34782	11.4558	5.35063	8.49429	10.3123
ENSG00000136059.14	VILL	50853	-0.309303	3.14411	1.71133	0.216143	0.379059	8.77122	8.01553	7.15237	9.22457	10.5777
ENSG00000143554.14	SLC27A3	11000	0.0770527	3.16171	0.112436	0.743374	0.842891	8.80969	8.83127	9.55469	8.45585	8.71995
ENSG00000128595.17	CALU	813	0.430193	7.58519	6.36161	0.027391	0.0928418	220.088	204.502	217.519	149.015	168.674
ENSG00000188191.15	PRKAR1B	5575	-1.02363	3.13887	18.8677	0.00103292	0.0124778	6.77077	5.60378	6.115	11.5307	13.5349
ENSG00000228782.7	MRPL45P2	653479	0.782658	3.15386	9.96338	0.00859757	0.0436176	11.9643	10.7465	9.06331	5.88066	6.44518
ENSG00000013583.10	HEBP1	4780	-0.463534	3.17414	2.31873	0.154611	0.301908	6.88618	6.13578	10.3737	13.3756	8.03752
ENSG00000189410.12	SH2D5	400745	-0.893691	3.17275	7.57435	0.0180172	0.0707089	6.0783	4.22057	9.77309	13.9137	10.7672
ENSG00000132510.10	KDM6B	23135	-0.543584	3.14272	2.8064	0.120612	0.255062	8.23264	6.98699	6.93398	15.0668	6.48309
ENSG00000167612.13	ANKRD33	283373	-0.359222	3.1152	1.08612	0.318569	0.491512	5.46278	12.1297	5.40523	9.57049	10.1986
ENSG00000196700.9	ZNF512B	57473	-0.438547	3.11907	2.33829	0.153031	0.300024	8.50193	9.00861	4.96844	9.263	11.1464
ENSG00000232573.1	RPL3P4	326307	-1.02597	3.15197	14.0314	0.0029555	0.0228117	6.88618	4.2915	7.53456	12.7607	12.5491
ENSG00000262576.3	PCDHGA4	56111	-0.505366	3.13081	3.84711	0.0742808	0.183168	6.50148	9.32781	6.388	11.2232	9.85734
ENSG00000167889.12	MGAT5B	146664	-0.227503	3.15036	0.964861	0.34601	0.519377	7.46323	8.61847	8.62652	9.76267	9.51612
ENSG00000108395.14	TRIM37	4591	0.487842	7.57929	7.41318	0.0190127	0.0731595	189.197	239.579	219.103	158.355	149.642
ENSG00000188290.10	HES4	57801	-1.64538	3.13306	41.7437	3.64764e-05	0.00188574	3.65468	4.75257	5.67822	14.8362	14.4448
ENSG00000247708.8	STX18-AS1	100507266	0.0191867	3.13151	0.00577872	0.9407	0.966383	9.23286	9.89528	6.98858	9.263	7.9617
ENSG00000007255.10	TRAPPC6A	79090	-0.798913	3.14017	7.56928	0.0180475	0.0708124	8.80969	4.57524	6.82478	10.5314	12.8904
ENSG00000101353.14	MROH8	140699	-0.433913	3.13837	3.27231	0.09643	0.219636	8.88663	6.88059	7.15237	10.7236	9.93316
ENSG00000145331.14	TRMT10A	93587	0.57257	3.14653	5.70716	0.0348539	0.109348	9.69451	11.314	9.2817	6.76468	6.82431
ENSG00000205571.13	SMN2	6607	1.22985	3.15296	21.5826	0.000617337	0.00948964	9.88686	13.7612	10.7013	4.4201	5.34571
ENSG00000198736.11	MSRB1	51734	-0.564275	3.11406	3.998	0.0695319	0.175631	6.27065	9.75341	5.45983	11.1848	10.0848
ENSG00000132906.18	CASP9	842	-0.0369014	3.13414	0.0235761	0.880607	0.92982	9.42522	8.61847	7.75295	7.99462	9.66777
ENSG00000166173.11	LARP6	55323	1.52605	3.19964	27.3312	0.000236955	0.00552761	12.6182	9.07954	15.5059	3.88201	4.70119
ENSG00000164877.19	MICALL2	79778	-0.946753	3.13955	11.4267	0.00571646	0.0337661	7.5017	4.25603	7.37076	12.4532	12.0563
ENSG00000132676.16	DAP3	7818	-0.0215495	7.58285	0.01324	0.910361	0.948537	209.201	155.239	207.091	194.869	191.839
ENSG00000219891.2	ZSCAN12P1	221584	0.112943	3.0868	0.0793141	0.78319	0.869409	7.80946	13.974	4.04027	8.14837	7.88587
ENSG00000111452.13	ADGRD1	283383	-0.0652882	3.11243	0.0552897	0.818202	0.892046	10.1562	9.18594	5.78742	8.6096	8.98534
ENSG00000186395.8	KRT10	3858	1.3142	3.21574	15.0201	0.00234499	0.0200258	11.4641	7.6254	17.526	4.57385	5.19406
ENSG00000095059.16	DHPS	1725	-0.791107	3.15904	5.98934	0.0313708	0.101728	5.92442	4.43337	10.3191	12.1841	11.4876
ENSG00000109089.7	CDR2L	30850	-0.333728	3.11166	1.66616	0.221909	0.386038	8.69428	8.583	5.89661	9.03239	10.5019
ENSG00000137802.14	MAPKBP1	23005	-0.559725	3.11139	4.80486	0.0495755	0.139198	8.23264	7.69633	5.56902	11.4154	9.78151
ENSG00000168676.11	KCTD19	146212	0.124238	3.12922	0.263145	0.617596	0.751331	10.3485	8.65394	7.86215	8.1868	8.265
ENSG00000235552.4	RPL6P27	645387	-0.621485	3.13299	6.9533	0.0222347	0.0809555	7.46323	6.24218	7.75295	10.5698	11.4118
ENSG00000198468.9	FLVCR1-DT	642946	0.616725	3.12851	6.10761	0.0300357	0.0985928	9.73298	11.7041	8.73572	6.91843	6.2177
ENSG00000137496.18	IL18BP	10068	-0.470188	3.11795	3.62852	0.0818836	0.196011	8.19417	7.55446	6.55179	11.7229	8.90952
ENSG00000132912.12	DCTN4	51164	0.249439	7.58664	2.00964	0.182602	0.338958	205.123	186.343	224.126	161.622	183.574
ENSG00000143067.5	ZNF697	90874	0.319327	3.12687	1.7821	0.207502	0.369874	9.77145	10.1081	8.29893	7.22591	7.84796
ENSG00000171219.9	CDC42BPG	55561	0.247034	3.15088	0.97499	0.343589	0.516513	10.1562	7.55446	10.5375	7.84088	7.99961
ENSG00000005238.19	FAM214B	80256	-0.302572	3.15606	1.01926	0.333292	0.506517	8.27111	5.21364	10.8651	9.87797	10.0469
ENSG00000166707.11	ZCCHC18	644353	0.25965	3.14181	1.23404	0.28912	0.460165	9.3098	8.72487	10.1007	7.84088	7.81004
ENSG00000173559.13	NABP1	64859	-0.0262708	3.09694	0.00746766	0.93261	0.961886	7.73252	11.5977	5.78742	7.6487	9.47821
ENSG00000186665.9	C17orf58	284018	-0.533062	3.11651	4.42864	0.0578721	0.155066	5.80901	8.76034	7.26157	10.8773	10.1986
ENSG00000158863.22	FAM160B2	64760	-0.460202	3.10912	3.21134	0.099229	0.223458	9.15592	7.05792	6.00581	10.8004	9.62986
ENSG00000179943.8	FIZ1	84922	-0.324332	3.12293	2.00592	0.182977	0.339408	7.54017	8.051	7.91675	10.0702	9.55403
ENSG00000182575.7	NXPH3	11248	0.153132	3.18308	0.187574	0.672887	0.791847	8.42499	5.67471	14.2501	9.87797	7.01387
ENSG00000198298.13	ZNF485	220992	0.221669	3.11077	0.743771	0.405934	0.576613	9.34827	10.4982	7.31617	7.03373	8.53039
ENSG00000161203.13	AP2M1	1173	-0.600254	7.56473	12.4284	0.00439447	0.0286889	158.921	141.194	170.51	242.875	232.709
ENSG00000069509.6	FUNDC1	139341	0.608067	3.12252	6.14725	0.0296035	0.0975937	9.77145	11.2785	8.95411	6.9953	6.14188
ENSG00000182957.16	SPATA13	221178	-0.635545	3.11327	7.0485	0.0215175	0.0793695	6.23218	7.69633	7.09777	9.91641	11.8667
ENSG00000247240.8	UBL7-AS1	440288	-0.156824	3.12909	0.451418	0.514822	0.669377	8.50193	7.48353	8.89952	9.30144	9.17491
ENSG00000146386.8	ABRACL	58527	1.06252	3.15383	18.124	0.0011995	0.0134067	11.5796	9.57608	12.3938	5.53474	5.15615
ENSG00000163377.16	TAFA4	151647	0.47136	3.17244	2.2822	0.15762	0.306044	9.50216	6.88059	13.9772	6.30345	8.22708
ENSG00000158286.13	RNF207	388591	-0.394119	3.09757	2.11755	0.172144	0.325198	6.463	9.82435	6.2242	10.6467	9.13699
ENSG00000149761.9	NUDT22	84304	-0.619091	3.10832	5.41628	0.0389409	0.11828	8.77122	5.74565	6.55179	9.37831	12.2079
ENSG00000163449.11	TMEM169	92691	-0.330315	3.076	0.891518	0.364319	0.53777	7.34782	10.8884	4.31326	7.68714	11.3359
ENSG00000164574.16	GALNT10	55568	1.90575	3.19356	31.8109	0.000123803	0.00379641	14.0416	7.87366	16.8709	3.57452	3.29842
ENSG00000172366.20	MCRIP2	84331	-1.10762	3.09876	21.9808	0.000574593	0.00916584	6.57842	5.42644	5.35063	12.8375	12.1321
ENSG00000107863.18	ARHGAP21	57584	0.154239	7.58414	0.741092	0.406755	0.577322	177.271	195.707	226.856	186.336	172.958
ENSG00000248124.7	RRN3P1	730092	0.162143	3.12525	0.471043	0.505996	0.661919	9.84839	8.19287	9.06331	7.84088	8.30291
ENSG00000110011.13	DNAJC4	3338	-0.124341	3.13682	0.203678	0.66009	0.782589	9.00204	6.31312	9.99148	10.6083	7.73422
ENSG00000132763.15	MMACHC	25974	-0.277755	3.08315	0.872041	0.369424	0.542759	8.1557	10.0017	4.91384	9.53205	9.21282
ENSG00000182208.14	MOB2	81532	-0.830731	3.1025	11.1771	0.00611566	0.0350836	7.77099	5.63925	6.00581	10.6851	12.3596
ENSG00000122707.12	RECK	8434	-0.0733965	3.11131	0.0856939	0.774895	0.86405	10.0407	7.55446	7.53456	9.53205	8.11335
ENSG00000179988.14	PSTK	118672	0.254191	3.1452	0.980578	0.342264	0.515047	8.34805	8.19287	11.684	8.1868	7.54465
ENSG00000186051.7	TAL2	6887	-1.03875	3.08611	16.8914	0.00155071	0.0157499	5.96289	6.98699	4.69545	11.377	12.8904
ENSG00000173175.14	ADCY5	111	-0.480078	3.11989	4.03771	0.0683439	0.173844	7.15547	6.66779	8.51733	10.8773	9.85734
ENSG00000183773.15	AIFM3	150209	0.110611	3.10759	0.21708	0.649901	0.775326	9.38674	9.22141	7.75295	8.10993	8.18917
ENSG00000157680.15	DGKI	9162	-0.649948	3.08607	3.31729	0.0944271	0.21667	4.11632	10.4982	5.84201	12.6838	8.79578
ENSG00000005810.18	MYCBP2	23077	-0.00196143	7.5671	0.000128233	0.991157	0.995152	184.196	194.926	189.238	208.629	170.797
ENSG00000170634.13	ACYP2	98	0.116114	3.09792	0.198998	0.663744	0.785364	10.4254	9.04407	6.71559	8.1868	7.9617
ENSG00000108733.10	PEX12	5193	0.176927	3.11048	0.556492	0.470526	0.633548	8.5404	9.78888	8.57193	7.45652	8.41665
ENSG00000060718.22	COL11A1	1301	-0.670943	3.12196	6.36388	0.0273686	0.0928277	6.88618	5.24911	8.84492	11.1848	10.9947
ENSG00000161956.13	SENP3	26168	-1.01617	3.08927	18.4034	0.00113345	0.0130758	6.7323	5.85205	5.29603	11.7998	12.3596
ENSG00000176720.6	BOK	666	-1.43028	3.08206	36.6735	6.58986e-05	0.00264464	5.15502	5.39098	4.36786	13.8369	13.042
ENSG00000198934.5	MAGEE1	51438	-0.0531414	3.13122	0.045018	0.835653	0.903187	8.00182	7.30619	10.4283	9.03239	8.71995
ENSG00000158008.10	EXTL1	2134	-1.17284	3.08262	23.606	0.000432616	0.00778405	6.03983	5.88751	4.75005	11.646	13.497
ENSG00000184599.13	TAFA3	284467	0.00947324	3.03403	0.00023313	0.988077	0.993338	3.53926	17.9463	2.62072	7.14904	8.98534
ENSG00000105287.12	PRKD2	25865	-0.141537	3.12438	0.248181	0.62767	0.758898	9.34827	6.10032	9.5001	10.8773	7.43092
ENSG00000141337.12	ARSG	22901	0.00823961	3.09552	0.00108527	0.97428	0.986766	7.73252	10.25	7.42536	8.53272	8.34082
ENSG00000117000.9	RLF	3640	0.0115916	7.55344	0.0043017	0.948823	0.971825	170.5	214.469	180.12	183.377	190.36
ENSG00000171450.6	CDK5R2	8941	0.0756358	3.09197	0.0533985	0.821278	0.89377	6.19371	12.1297	7.47996	10.0702	6.29353
ENSG00000180938.6	ZNF572	137209	-0.0194295	3.07809	0.00414789	0.949745	0.972312	8.27111	10.8884	5.67822	7.1106	9.7436
ENSG00000185053.14	SGCZ	137868	1.29968	3.16303	15.5793	0.00206574	0.0186499	11.5796	8.86674	14.6869	6.18815	3.29842
ENSG00000026103.22	FAS	355	1.79094	3.11624	34.4745	8.69013e-05	0.00306535	16.3114	10.0726	9.66389	3.45921	3.48798
ENSG00000107882.11	SUFU	51684	-0.397425	3.09881	2.78736	0.121752	0.256742	7.69405	7.66086	7.20697	11.0695	8.75786
ENSG00000187630.17	DHRS4L2	317749	-0.422822	3.09239	3.20305	0.0996172	0.223995	7.30935	8.22833	6.71559	9.53205	10.3881
ENSG00000135587.9	SMPD2	6610	-0.939006	3.10585	12.5279	0.00428399	0.0282955	5.50125	5.49738	7.75295	13.7984	10.0848
ENSG00000102383.14	ZDHHC15	158866	-0.0929143	3.07421	0.0939348	0.764665	0.856851	6.53995	11.5622	6.1696	8.10993	9.21282
ENSG00000187097.12	ENTPD5	957	0.1194	3.07686	0.179644	0.679433	0.796312	10.1946	9.64701	5.95121	8.53272	7.35509
ENSG00000188732.11	FAM221A	340277	0.693896	3.12955	7.93983	0.0159801	0.0651663	9.61757	9.29234	11.9024	6.30345	6.36936
ENSG00000069248.12	NUP133	55746	-0.426193	7.55304	6.60733	0.0250929	0.0878323	174.809	154.671	165.597	218.353	225.126
ENSG00000244687.11	UBE2V1	7335	0.180948	3.1139	0.433916	0.522935	0.676201	10.8486	6.59685	9.60929	8.68647	7.20344
ENSG00000166387.13	PPFIBP2	8495	0.44113	3.14014	1.6375	0.225672	0.390201	11.5026	5.49738	12.4484	8.41742	5.99023
ENSG00000175040.6	CHST2	9435	-0.380323	3.06819	1.38891	0.2622	0.431089	5.11655	11.0657	5.95121	9.91641	9.36447
ENSG00000176108.9	CHMP6	79643	-1.13375	3.05593	15.3727	0.0021641	0.0191334	6.27065	6.70325	3.60348	11.1079	13.3074
ENSG00000068354.16	TBC1D25	4943	0.0550128	3.11333	0.042769	0.839747	0.905519	9.73298	6.45499	9.99148	8.80177	7.9617
ENSG00000229638.1	RPL4P4	647276	-0.805135	3.09358	9.49565	0.0098611	0.0477201	7.19394	4.82351	7.53456	11.5691	11.1464
ENSG00000188493.15	C19orf54	284325	-0.374601	3.09175	2.27195	0.158477	0.30699	7.69405	6.98699	7.97135	11.377	8.18917
ENSG00000240184.7	PCDHGC3	5098	-0.408619	3.09932	2.15166	0.168998	0.321559	7.61711	6.20672	8.73572	12.2994	7.62048
ENSG00000277972.2	CISD3	284106	-0.316271	3.05638	0.791326	0.391776	0.563417	4.80878	11.9524	5.62362	9.49362	9.17491
ENSG00000099330.9	OCEL1	79629	-0.104655	3.08018	0.196136	0.666004	0.786832	8.88663	8.1574	7.31617	8.76334	8.71995
ENSG00000145592.14	RPL37	6167	-0.236558	9.76124	1.50615	0.244053	0.411279	815.916	700.508	913.647	997.483	911.159
ENSG00000106976.20	DNM1	1759	-0.546587	7.55554	8.83057	0.0120578	0.0540222	164.114	142.187	170.074	262.055	201.772
ENSG00000106077.18	ABHD11	83451	-0.28752	3.08632	1.52209	0.241719	0.408535	7.80946	7.30619	8.08054	9.95485	8.90952
ENSG00000174529.7	TMEM81	388730	0.462163	3.13376	1.65693	0.223112	0.387454	11.7334	4.96537	12.776	7.41809	6.7864
ENSG00000116985.12	BMP8B	656	-0.26179	3.05924	0.898787	0.362441	0.536234	6.69383	10.1435	6.00581	9.18613	9.13699
ENSG00000130363.12	RSPH3	83861	-0.0153901	3.06162	0.00333271	0.954947	0.975272	8.57887	9.85981	6.1696	7.80245	8.83369
ENSG00000152154.11	TMEM178A	130733	0.393792	3.09613	2.68711	0.127981	0.266259	9.46369	8.90221	9.77309	6.4572	7.81004
ENSG00000158109.15	TPRG1L	127262	0.0645108	3.09855	0.0571894	0.815168	0.890036	10.2716	6.34859	9.3363	7.80245	8.71995
ENSG00000167981.7	ZNF597	146434	0.529714	3.10098	4.86626	0.0483616	0.137025	10.0023	8.76034	10.3737	6.9953	6.44518
ENSG00000173436.15	MICOS10	440574	0.127042	3.09852	0.235632	0.636418	0.765298	8.27111	8.08647	10.0461	6.53407	9.55403
ENSG00000038002.9	AGA	175	0.281705	3.08833	1.42859	0.255861	0.423704	8.38652	9.50514	9.3363	7.61027	7.31718
ENSG00000162733.19	DDR2	4921	0.299437	3.09112	1.22998	0.289876	0.460633	11.1948	7.19979	9.00871	6.5725	8.265
ENSG00000180667.10	YOD1	55432	0.765063	7.63146	6.47873	0.0262656	0.0904025	231.052	138.96	342.113	134.217	145.017
ENSG00000170619.10	COMMD5	28991	-1.28371	3.06221	30.6144	0.000146209	0.00416332	5.50125	4.92991	5.29603	12.2994	13.2316
ENSG00000225930.4	LINC02249	26082	0.0841934	3.08672	0.0927525	0.766102	0.857764	9.54063	7.6254	8.68112	10.147	6.10397
ENSG00000166987.15	MBD6	114785	0.276656	3.1153	0.797283	0.390056	0.56189	9.00204	6.91606	11.9024	9.57049	5.68693
ENSG00000227811.3	INKA2-AS1	100506343	0.392391	3.06624	2.24479	0.160778	0.310328	10.8101	9.54061	7.09777	7.14904	6.82431
ENSG00000265735.2	RN7SL5P	6031	-0.713361	3.07482	6.22077	0.0288213	0.0959765	8.61734	4.53977	6.77018	11.3001	10.4639
ENSG00000184110.14	EIF3C	8663	0.728277	3.12252	6.24163	0.028604	0.0955188	7.46323	9.71795	13.7588	6.14971	6.25562
ENSG00000128917.8	DLL4	54567	-0.496698	3.06258	4.49453	0.0563045	0.152047	7.5017	7.27073	6.49719	9.57049	10.4639
ENSG00000141198.16	TOM1L1	10040	1.29726	3.07772	22.1347	0.000559017	0.00904257	9.15592	13.8676	9.88228	4.45854	4.47371
ENSG00000167700.9	MFSD3	113655	-1.12857	3.05086	21.9167	0.000581232	0.00920268	5.92442	5.88751	4.80465	13.0681	11.2222
ENSG00000183580.10	FBXL7	23194	-0.425083	3.04894	1.54057	0.239049	0.406012	4.80878	10.8174	5.89661	11.4538	7.88587
ENSG00000197153.4	H3C12	8350	-2.21123	7.51916	141.219	7.60084e-08	5.81491e-05	69.3619	71.2531	83.6991	301.566	390.73
ENSG00000159792.10	PSKH1	5681	-0.577805	3.03134	2.62262	0.1322	0.272366	8.23264	8.33473	3.54889	7.76401	12.3975
ENSG00000205763.13	RP9P	441212	-0.100205	3.07004	0.182157	0.677341	0.79495	7.57864	8.79581	7.86215	8.6096	8.71995
ENSG00000135766.9	EGLN1	54583	-0.867951	3.07693	6.71694	0.0241424	0.0856625	3.77009	6.88059	8.24434	14.1059	8.79578
ENSG00000140691.17	ARMC5	79798	-0.449911	3.06472	3.26585	0.0967216	0.220012	8.69428	6.24218	6.71559	9.60892	10.1227
ENSG00000168884.15	TNIP2	79155	-0.396534	3.08647	2.05302	0.178302	0.333219	8.34805	5.21364	8.89952	9.30144	10.3502
ENSG00000180155.20	LYNX1	66004	-0.771349	3.05486	10.5897	0.00719286	0.0387925	6.00136	7.23526	5.95121	10.8004	11.0705
ENSG00000235150.1	RCBTB2P1	100130253	-0.8676	3.05795	11.3224	0.00587937	0.0343104	7.77099	5.10724	5.67822	11.1848	11.4118
ENSG00000007171.18	NOS2	4843	1.34221	3.09322	22.6567	0.000509743	0.00857009	14.1571	8.79581	10.5921	4.18949	4.62537
ENSG00000172671.20	ZFAND4	93550	0.0158793	3.04771	0.00334731	0.954848	0.975272	7.96335	10.4982	6.115	8.22524	8.03752
ENSG00000187187.14	ZNF546	339327	-0.0697121	3.02716	0.0383419	0.848147	0.91067	7.69405	11.6686	4.20407	7.84088	8.75786
ENSG00000113558.18	SKP1	6500	0.0901299	7.56036	0.28516	0.603423	0.740213	197.93	183.754	198.41	170.962	192.332
ENSG00000198944.6	SOWAHA	134548	0.63258	3.08749	7.10196	0.0211267	0.0784987	10.1177	9.22141	10.1553	6.38033	6.29353
ENSG00000168273.8	SMIM4	440957	-0.293775	3.05713	1.45466	0.251807	0.419266	7.30935	8.54754	6.77018	10.0317	8.49247
ENSG00000196873.15	CBWD3	220869	0.0801552	3.04141	0.0751447	0.788809	0.872676	8.84816	10.4628	5.56902	7.26435	8.49247
ENSG00000219665.8	ZNF433-AS1	101928464	-0.00658876	3.08925	0.000659116	0.979954	0.989515	8.69428	6.63232	9.99148	8.6096	8.30291
ENSG00000228014.1	ZNF680P1	728947	1.07619	3.05136	9.00509	0.0114297	0.0521324	10.0023	13.4774	7.64376	3.11329	6.74848
ENSG00000239039.1	SNORD13	692084	-2.25688	3.03605	55.6635	9.28829e-06	0.000861012	3.69315	2.94376	3.0029	20.1787	10.6156
ENSG00000049323.16	LTBP1	4052	1.12054	3.12291	15.6498	0.00203338	0.0184768	9.88686	8.83127	14.5231	5.15038	5.00449
ENSG00000172594.13	SMPDL3A	10924	1.05424	3.10491	15.8247	0.00195569	0.0180934	11.3872	8.61847	12.3938	4.80446	5.57319
ENSG00000185973.11	TMLHE	55217	-0.423951	3.04632	2.48371	0.141896	0.284837	6.65536	8.90221	5.95121	11.0695	8.22708
ENSG00000196975.16	ANXA4	307	0.622811	3.05628	5.56339	0.036806	0.113603	11.0025	10.2145	7.47996	6.64938	5.80066
ENSG00000079616.12	KIF22	3835	-0.611358	7.56797	6.91607	0.0225229	0.0816146	166.461	106.72	196.772	236.226	242.225
ENSG00000203778.8	FAM229B	619208	0.756672	3.06354	7.72812	0.0171246	0.0682965	12.5798	9.00861	8.08054	6.07284	5.64901
ENSG00000224631.4	RPS27AP16	643358	-0.500135	3.08113	3.15731	0.101794	0.227391	6.88618	5.42644	9.3363	11.5307	8.79578
ENSG00000187391.21	MAGI2	9863	0.917426	3.05544	9.25402	0.0105995	0.0498151	9.80992	12.1297	8.46273	3.92044	6.82431
ENSG00000142082.15	SIRT3	23410	-0.627486	3.03241	5.58638	0.0364852	0.112944	6.57842	8.19287	5.07764	9.53205	10.9947
ENSG00000150275.18	PCDH15	65217	2.52753	3.16176	35.9319	7.22363e-05	0.00275712	14.5033	6.59685	19.0548	2.03709	2.57807
ENSG00000186666.6	BCDIN3D	144233	-0.148135	3.02674	0.234709	0.637073	0.765879	8.57887	9.68248	4.80465	7.76401	9.36447
ENSG00000114115.10	RBP1	5926	0.197284	3.09547	0.414884	0.532031	0.683088	9.84839	5.63925	11.411	8.30211	7.27926
ENSG00000129535.12	NRL	4901	-1.91509	3.02938	60.3637	6.24253e-06	0.000704307	3.19303	4.32697	3.93107	14.1443	14.6723
ENSG00000138166.6	DUSP5	1847	-0.650227	3.03755	3.4174	0.09015	0.209755	4.15479	9.57608	6.06041	13.0681	7.69631
ENSG00000157326.19	DHRS4	10901	-0.268487	3.0465	1.26594	0.283272	0.454365	8.1557	7.87366	6.60639	9.18613	9.02325
ENSG00000113712.18	CSNK1A1	1452	-0.111765	7.55876	0.44445	0.518024	0.672176	185.734	169.248	192.786	192.832	201.734
ENSG00000204410.16	MSH5	4439	0.333815	3.0661	1.98865	0.184731	0.341308	8.5404	9.43421	9.17251	7.49496	6.86222
ENSG00000149292.16	TTC12	54970	-0.173853	3.02852	0.375691	0.551747	0.699441	8.38652	9.36328	5.18683	8.45585	8.8716
ENSG00000169330.9	MINAR1	23251	1.52798	3.10965	29.2381	0.000178133	0.00464467	11.9643	8.83127	14.1409	3.80513	4.24624
ENSG00000198873.12	GRK5	2869	-0.184085	3.04879	0.538958	0.477443	0.639455	7.34782	8.61847	7.31617	10.147	7.50674
ENSG00000275832.5	ARHGAP23	57636	0.23882	3.07193	0.837223	0.378821	0.550734	10.387	6.88059	9.3909	7.76401	7.27926
ENSG00000142798.20	HSPG2	3339	-0.510064	3.05979	2.76282	0.123241	0.259151	9.19439	4.46884	7.53456	11.1464	8.94743
ENSG00000146828.18	SLC12A9	56996	-0.866559	3.03683	13.406	0.00343873	0.0248539	6.77077	5.99392	5.51442	11.377	10.881
ENSG00000158445.10	KCNB1	3745	0.664768	3.06829	5.88666	0.0325877	0.104615	10.2716	9.29234	9.71849	7.6487	4.66328
ENSG00000160972.9	PPP1R16A	84988	-1.03617	3.04683	17.058	0.00149678	0.0154639	6.42453	4.57524	6.2788	11.3385	12.2458
ENSG00000105617.4	LENG1	79165	0.0388952	3.09208	0.016738	0.899277	0.941308	6.65536	6.98699	12.1208	7.57183	9.06117
ENSG00000198952.8	SMG5	23381	-0.519121	7.54675	8.95735	0.0115976	0.0526856	176.617	140.981	160.3	232.92	223.648
ENSG00000173581.8	CCDC106	29903	-0.426348	3.06962	2.45191	0.144242	0.287986	7.30935	5.56831	9.11791	10.9542	8.68204
ENSG00000182749.5	PAQR7	164091	0.514209	3.03229	2.99669	0.109918	0.239385	8.77122	11.9878	6.77018	5.45787	7.43092
ENSG00000164465.18	DCBLD1	285761	0.153846	3.05887	0.396264	0.541226	0.69079	7.54017	9.22141	9.06331	8.34055	7.12761
ENSG00000187049.10	TMEM216	51259	-0.402463	3.04285	2.35717	0.151524	0.298047	8.96357	6.24218	6.44259	10.5698	8.53039
ENSG00000127124.16	HIVEP3	59269	-0.984328	3.03979	16.0247	0.00187104	0.01761	5.42431	5.88751	6.2242	13.2219	9.89525
ENSG00000163376.11	KBTBD8	84541	0.950842	3.06151	14.0203	0.00296334	0.0228348	8.88663	11.7396	10.1553	5.57318	5.04241
ENSG00000165046.12	LETM2	137994	0.715066	3.05168	7.29533	0.0197822	0.0748362	8.07876	11.9524	9.17251	5.65005	6.2177
ENSG00000260442.5	ATP2A1-AS1	100289092	0.15937	3.05526	0.453283	0.513971	0.668416	8.77122	8.44114	8.57193	8.26367	7.12761
ENSG00000198948.12	MFAP3L	9848	0.22412	3.03079	0.69465	0.421419	0.590255	8.30958	10.711	6.66099	7.6487	7.05179
ENSG00000102312.22	PORCN	64840	-0.442247	3.02193	2.22296	0.162658	0.312981	5.46278	9.85981	5.67822	10.147	8.94743
ENSG00000153561.13	RMND5A	64795	-0.0621896	7.54273	0.123074	0.732013	0.834758	180.887	200.743	167.78	174.306	208.141
ENSG00000163040.14	CCDC74A	90557	-0.866595	3.04994	10.6777	0.0070179	0.0381956	6.50148	4.71711	7.31617	12.4532	10.009
ENSG00000136274.9	NACAD	23148	-0.0775853	3.05572	0.0856224	0.774986	0.864098	9.11745	6.56139	8.51733	9.87797	7.12761
ENSG00000149571.12	KIRREL3	84623	-1.58007	3.04424	25.6624	0.000307896	0.00640581	4.30867	2.90829	6.49719	12.9913	14.1036
ENSG00000171843.16	MLLT3	4300	3.1624	3.07924	88.2259	9.15297e-07	0.000219071	9.84839	15.6764	13.595	1.76804	1.13739
ENSG00000126953.8	TIMM8A	1678	-0.14247	3.02454	0.291407	0.599531	0.737451	8.9251	8.40567	5.78742	8.91708	8.15126
ENSG00000129680.16	MAP7D3	79649	3.12111	3.07668	125.999	1.40208e-07	7.39762e-05	12.1181	13.903	12.9398	1.42212	1.55443
ENSG00000130829.18	DUSP9	1852	-1.37309	3.00151	14.2536	0.00280335	0.0221972	3.07762	7.87366	3.43969	13.2988	11.753
ENSG00000134072.11	CAMK1	8536	-0.0832452	3.03087	0.105507	0.751102	0.84769	7.57864	9.15047	6.93398	7.22591	9.51612
ENSG00000111885.7	MAN1A1	4121	1.20637	3.06649	20.5242	0.00075039	0.0104953	12.8106	8.76034	10.7013	4.76603	4.54954
ENSG00000166803.13	PCLAF	9768	0.798288	3.03346	6.16928	0.0293664	0.0970549	8.57887	12.4489	8.24434	3.92044	7.31718
ENSG00000069329.18	VPS35	55737	0.0620028	7.54735	0.136201	0.718736	0.825647	188.774	203.687	178.045	180.033	184.332
ENSG00000177946.6	CENPBD1	92806	-0.251006	3.01365	0.667929	0.430242	0.597886	5.84748	10.711	5.62362	8.7249	8.94743
ENSG00000197753.11	LHFPL5	222662	0.786718	3.06526	10.0167	0.00846596	0.0431084	10.6947	8.6894	10.5921	6.11128	5.45945
ENSG00000177706.9	FAM20C	56975	-0.696595	3.0366	7.96761	0.0158367	0.064788	7.27088	5.32004	6.93398	10.5698	10.5019
ENSG00000178896.9	EXOSC4	54512	-0.954956	3.01461	15.3533	0.00217359	0.0191857	5.96289	6.49045	4.91384	10.7236	11.7909
ENSG00000215612.8	HMX1	3166	-1.75809	3.02952	28.9743	0.00018515	0.00475165	4.69337	2.41175	5.35063	16.143	11.753
ENSG00000228300.14	FAM174C	55009	-1.7108	3.0051	44.8216	2.6183e-05	0.00156566	5.0396	3.9723	3.38509	13.1066	14.0657
ENSG00000230530.2	LIMD1-AS1	644714	-0.0963591	3.0019	0.0898615	0.769657	0.85992	7.117	11.0302	4.85924	7.99462	8.49247
ENSG00000019485.13	PRDM11	56981	-0.56011	3.00348	3.84051	0.0744973	0.183522	7.04006	8.3702	4.47706	9.41675	10.2365
ENSG00000163629.13	PTPN13	5783	3.10211	3.11235	73.921	2.26556e-06	0.000387066	14.6956	8.93767	16.4341	1.88335	1.21321
ENSG00000187609.16	EXD3	54932	-1.04822	3.02071	10.4326	0.00751782	0.0398198	8.27111	3.5467	5.02304	11.1079	12.1321
ENSG00000163946.13	TASOR	23272	0.26092	7.52863	1.42231	0.256849	0.42458	208.163	235.501	149.162	144.864	185.053
ENSG00000196741.5	LINC01560	203414	-0.0714459	3.03435	0.0868331	0.77345	0.863083	8.23264	7.90913	7.69835	7.34122	9.36447
ENSG00000235166.8	LINC01440	102723578	0.36858	3.0347	2.11376	0.172498	0.325627	7.73252	10.6046	8.40813	7.18748	6.63475
ENSG00000276180.1	H4C9	8294	1.26779	3.11046	11.1759	0.00611777	0.0350836	12.4259	5.74565	15.6151	4.18949	5.11823
ENSG00000099338.23	CATSPERG	57828	0.395824	3.01277	1.79711	0.205728	0.368061	11.2333	9.29234	5.89661	6.5725	6.86222
ENSG00000153233.13	PTPRR	5801	-0.439275	3.03084	3.55917	0.0844923	0.200862	6.88618	6.98699	7.37076	9.22457	9.97108
ENSG00000255423.1	EBLN2	55096	-0.310216	3.06238	1.06099	0.323991	0.496814	7.38629	5.10724	10.2645	10.2623	8.45456
ENSG00000090020.11	SLC9A1	6548	-0.220825	3.0284	0.728171	0.410753	0.580974	8.69428	6.91606	7.09777	10.3008	7.35509
ENSG00000100211.10	CBY1	25776	-0.46045	3.00793	3.06011	0.106617	0.234589	7.30935	7.90913	5.45983	8.26367	10.7672
ENSG00000130032.16	PRRG3	79057	-0.27157	3.01584	1.11294	0.312923	0.48553	7.34782	8.44114	6.3334	10.2239	7.62048
ENSG00000223459.6	TCAF1P1	653199	-0.244077	3.01217	0.918137	0.357512	0.531753	8.38652	7.69633	6.1696	9.8011	7.81004
ENSG00000120137.7	PANK3	79646	0.475451	9.77779	4.02237	0.0688	0.174446	907.244	761.688	1297.64	681.58	740.779
ENSG00000134644.15	PUM1	9698	0.101388	7.57301	0.299689	0.594454	0.733773	186.465	170.17	230.405	181.647	183.081
ENSG00000268895.6	A1BG-AS1	503538	-0.695794	2.99682	6.54465	0.0256565	0.089068	6.84771	7.44806	4.58625	9.263	11.2222
ENSG00000003402.20	CFLAR	8837	1.10837	3.022	16.8624	0.00156031	0.0157959	9.27133	12.6972	8.73572	4.8429	4.66328
ENSG00000174165.8	ZDHHC24	254359	-0.461413	3.03647	3.28716	0.0957627	0.218613	7.00159	5.71018	8.51733	9.60892	9.81942
ENSG00000181523.13	SGSH	6448	-0.688531	3.01427	6.17076	0.0293506	0.0970545	8.50193	4.89444	5.84201	10.3008	10.3881
ENSG00000275549.1	STPG3-AS1	100129722	-0.529396	2.98837	3.00612	0.109419	0.238937	7.38629	8.44114	4.04027	9.53205	9.70569
ENSG00000111261.14	MANSC1	54682	1.19256	3.02072	19.6369	0.000888502	0.0115038	9.9638	12.4489	8.68112	4.18949	4.89076
ENSG00000159917.17	ZNF235	9310	-0.129507	3.02482	0.301338	0.593454	0.733093	8.30958	7.23526	7.75295	8.68647	8.30291
ENSG00000159650.9	UROC1	131669	-0.68497	2.96633	2.49995	0.140718	0.283117	4.6549	10.8529	2.94831	8.1868	11.7909
ENSG00000163617.11	CCDC191	57577	0.597727	3.01524	4.7862	0.0499516	0.139941	7.84793	11.6686	8.24434	5.53474	6.71057
ENSG00000162076.13	FLYWCH2	114984	-0.631861	3.00588	6.34534	0.0275518	0.0931201	7.61711	5.99392	5.89661	9.03239	11.1464
ENSG00000149527.18	PLCH2	9651	-1.25961	7.50355	21.956	0.000577151	0.00917052	94.0213	170.844	84.2451	254.713	302.886
ENSG00000132570.15	PCBD2	84105	-0.0647098	2.9853	0.0409436	0.843152	0.907947	7.84793	10.1435	4.96844	6.49563	9.59195
ENSG00000182185.18	RAD51B	5890	-0.278429	2.9789	0.655096	0.434586	0.601867	7.61711	9.75341	4.04027	10.3008	7.12761
ENSG00000200169.1	RNU5D-1	26830	0.398244	2.98412	0.709435	0.416661	0.585912	3.96244	15.5345	6.388	5.03508	8.11335
ENSG00000145819.18	ARHGAP26	23092	0.300027	3.01413	1.53166	0.240332	0.407111	8.77122	9.29234	7.86215	7.45652	6.59683
ENSG00000187531.14	SIRT7	51547	-0.721488	3.00689	8.29181	0.0142718	0.0604824	7.54017	5.32004	6.06041	10.6851	10.1227
ENSG00000072786.13	STK10	6793	0.720538	3.0142	8.01727	0.0155843	0.0640424	10.964	9.46968	8.02594	5.76535	5.76275
ENSG00000126464.14	PRR12	57479	-0.749952	3.01669	5.80618	0.0335812	0.106716	7.42476	4.53977	6.93398	13.5294	7.62048
ENSG00000167720.13	SRR	63826	-0.348045	2.99435	1.79842	0.205574	0.367896	6.61689	8.79581	5.84201	8.80177	9.28864
ENSG00000104671.8	DCTN6	10671	0.904293	3.04047	11.7692	0.00521749	0.0318572	8.46346	10.3209	11.3564	4.68915	6.02814
ENSG00000203809.7	LIN28B-AS1	100113403	0.711401	3.01208	7.9293	0.0160348	0.0653154	9.00204	10.9593	8.40813	5.53474	6.02814
ENSG00000175063.17	UBE2C	11065	-0.0589556	7.59623	0.0394302	0.846037	0.909675	199.238	106.224	265.511	205.9	190.436
ENSG00000103042.9	SLC38A7	55238	-0.259198	2.97823	0.736447	0.408185	0.57863	6.77077	9.93075	4.85924	8.64803	8.64413
ENSG00000138587.6	MNS1	55329	1.58288	3.13768	11.178	0.00611417	0.0350836	6.23218	7.98007	21.9485	4.22793	3.75337
ENSG00000127561.15	SYNGR3	9143	0.284576	3.05139	0.692828	0.422011	0.590842	10.387	4.82351	11.4656	6.87999	7.65839
ENSG00000223572.9	CKMT1A	548596	0.0357342	3.01206	0.0208947	0.887547	0.933588	8.88663	7.44806	7.86215	8.76334	6.97596
ENSG00000116353.16	MECR	51102	-0.393928	2.97841	1.84936	0.199704	0.360681	8.42499	7.55446	4.69545	8.03306	10.1606
ENSG00000153485.5	TMEM251	26175	-0.0401521	2.99681	0.0250546	0.876953	0.927352	9.23286	7.55446	6.60639	7.5334	8.53039
ENSG00000157927.17	RADIL	55698	-0.957485	3.0028	13.7343	0.00317431	0.0238259	6.34759	4.5043	6.44259	12.1072	10.2365
ENSG00000184903.10	IMMP2L	83943	0.21075	2.98762	0.603089	0.452948	0.617434	8.38652	10.1081	6.3334	6.61094	7.73422
ENSG00000196689.12	TRPV1	7442	-0.511005	2.99359	4.37167	0.0592704	0.157449	7.117	6.88059	6.1696	8.45585	10.7293
ENSG00000163577.8	EIF5A2	56648	1.23759	3.02437	24.9101	0.00034788	0.0068881	9.69451	11.1366	10.6467	4.38167	4.51163
ENSG00000203879.12	GDI1	2664	-0.0284268	7.56642	0.0221543	0.884234	0.931869	164.23	180.988	218.775	211.819	171.593
ENSG00000172006.12	ZNF554	115196	-0.806479	2.96428	6.41462	0.0268746	0.0917418	6.69383	7.58993	3.38509	9.8011	10.9568
ENSG00000267750.6	RUNDC3A-AS1	101926996	0.558526	3.00221	4.30699	0.060908	0.160515	11.4641	8.22833	7.58916	5.95753	6.40727
ENSG00000095713.14	CRTAC1	55118	-0.625315	2.99195	6.28412	0.0281672	0.0946417	7.42476	5.88751	6.06041	11.0695	8.8716
ENSG00000106479.11	ZNF862	643641	-0.694746	2.96271	4.81876	0.0492974	0.138656	7.61711	7.23526	3.54889	9.37831	10.6156
ENSG00000161179.14	YDJC	150223	-1.13247	2.98437	19.5147	0.000909766	0.0116407	6.463	4.32697	5.07764	11.3001	11.9046
ENSG00000242071.3	RPL7AP6	326310	-0.744324	2.99807	9.31105	0.0104195	0.049344	5.61666	5.92298	7.15237	9.76267	11.0705
ENSG00000093217.11	XYLB	9942	0.0478463	2.99531	0.0347501	0.855341	0.914746	7.27088	9.00861	7.69835	8.91708	6.55892
ENSG00000204962.6	PCDHA8	56140	-0.683268	2.97405	7.06557	0.0213917	0.0790672	5.80901	7.69633	5.18683	9.99328	10.0848
ENSG00000264350.1	SNRPGP2	100130003	0.0832471	2.99007	0.111185	0.744749	0.84397	7.38629	9.39874	7.31617	7.18748	7.99961
ENSG00000167173.19	C15orf39	56905	-0.554375	3.0025	4.36895	0.0593382	0.157582	6.03983	6.17125	7.86215	11.6076	7.99961
ENSG00000100604.13	CHGA	1113	-0.418329	7.52421	4.58362	0.0542655	0.148247	145.648	199.927	140.863	207.168	226.302
ENSG00000211451.12	GNRHR2	114814	0.260229	3.04351	0.660248	0.432834	0.600371	8.84816	5.42644	12.1208	7.18748	7.43092
ENSG00000132003.9	ZSWIM4	65249	-1.25639	2.95999	20.7603	0.000718001	0.0102795	5.3089	5.92298	3.49429	12.7991	10.8052
ENSG00000151552.12	QDPR	5860	0.157122	2.99069	0.390912	0.543925	0.692854	8.23264	8.83127	7.53456	6.34189	8.37874
ENSG00000105376.5	ICAM5	7087	-0.581718	3.027	1.90065	0.194013	0.353232	7.84793	2.66002	9.82769	11.6076	8.53039
ENSG00000188868.14	ZNF563	147837	-0.410525	2.96501	2.03749	0.179826	0.335263	8.38652	7.44806	4.53166	9.30144	8.83369
ENSG00000099337.5	KCNK6	9424	0.425135	3.00098	2.85679	0.117658	0.250753	9.19439	8.051	9.2817	5.72692	7.43092
ENSG00000178026.13	LRRC75B	388886	-0.564692	2.98778	5.54362	0.0370847	0.11413	6.30912	6.10032	7.37076	10.147	9.32656
ENSG00000107521.19	HPS1	3257	-0.225811	2.96474	0.612864	0.4494	0.615028	9.65604	6.77419	5.18683	8.6096	8.30291
ENSG00000160055.19	TMEM234	56063	-0.575092	2.98177	5.67496	0.0352802	0.110279	7.00159	5.78111	6.82478	9.1477	10.3123
ENSG00000077238.14	IL4R	3566	-1.01957	2.98039	15.4277	0.00213736	0.0190077	5.92442	4.25603	6.44259	10.762	11.6392
ENSG00000198743.7	SLC5A3	6526	0.377723	7.57494	3.99059	0.0697563	0.17595	185.773	194.855	249.296	168.886	154.267
ENSG00000105227.15	PRX	9588	-0.916748	2.9614	10.0275	0.00843983	0.043022	7.77099	4.68164	4.53166	9.72423	11.7151
ENSG00000138621.12	PPCDC	60490	-0.477657	2.96774	3.55614	0.0846085	0.201049	5.92442	7.98007	6.115	8.6096	10.009
ENSG00000266714.9	MYO15B	80022	0.34415	2.99049	1.49817	0.245233	0.412374	11.2333	6.59685	7.97135	6.87999	6.67266
ENSG00000007376.8	RPUSD1	113000	-1.36941	2.94612	24.9516	0.000345516	0.006857	5.0396	5.46191	3.38509	10.6467	13.4211
ENSG00000111252.11	SH2B3	10019	-0.206823	2.99428	0.68795	0.423604	0.592378	6.80924	6.84512	8.68112	9.263	7.88587
ENSG00000204963.6	PCDHA7	56141	-0.552093	2.97622	4.97048	0.0463821	0.133268	7.5017	5.67471	6.49719	8.95552	10.2744
ENSG00000213889.10	PPM1N	147699	0.591545	2.97107	3.11195	0.104011	0.230693	5.77054	13.1228	7.97135	5.72692	6.17979
ENSG00000250486.4	FAM218A	152756	1.55137	2.97331	25.8491	0.000298828	0.00636673	10.2716	13.2292	8.13514	2.95955	4.24624
ENSG00000099992.15	TBC1D10A	83874	-0.376955	3.01463	1.37312	0.264784	0.434103	6.53995	4.6107	10.4283	9.8011	8.75786
ENSG00000197818.11	SLC9A8	23315	-0.303945	2.95671	1.31662	0.274316	0.444985	7.30935	8.3702	5.29603	8.53272	8.79578
ENSG00000130707.18	ASS1	445	0.13767	7.58092	0.28429	0.603969	0.740726	228.706	123.177	244.109	185.145	175.916
ENSG00000147813.16	NAPRT	93100	-0.975039	2.95725	13.6722	0.00322244	0.0239687	7.04006	4.92991	4.58625	10.8004	10.9568
ENSG00000183401.12	CCDC159	126075	-0.395541	2.95428	1.78145	0.20758	0.369936	5.0396	9.46968	5.84201	8.87865	9.02325
ENSG00000225975.7	LINC01534	101927621	0.629722	3.00129	6.29563	0.0280502	0.0943191	8.88663	8.3702	10.5375	6.38033	5.57319
ENSG00000131435.13	PDLIM4	8572	-1.47718	2.95026	37.4116	6.02291e-05	0.00254223	4.96266	4.11417	4.25866	12.9913	11.7909
ENSG00000148814.18	LRRC27	80313	-0.336547	2.95497	1.53403	0.239989	0.40695	5.6936	9.00861	6.06041	8.91708	8.60621
ENSG00000155629.15	PIK3AP1	118788	0.483233	2.96438	3.4684	0.0880628	0.206073	9.3098	9.64701	7.15237	5.68848	6.7864
ENSG00000228624.7	HDAC2-AS2	101927768	0.0840815	2.95541	0.0863584	0.774051	0.863485	6.42453	10.5692	6.49719	7.72557	7.0897
ENSG00000163888.4	CAMK2N2	94032	0.119941	2.94722	0.144707	0.71052	0.819153	6.03983	11.4558	6.06041	7.14904	7.35509
ENSG00000115297.11	TLX2	3196	-0.48496	2.9587	4.14749	0.0651864	0.168159	6.30912	7.27073	6.2788	9.18613	9.36447
ENSG00000196453.8	ZNF777	27153	-0.26041	2.95916	0.92112	0.35676	0.53107	5.77054	8.86674	6.71559	9.57049	7.50674
ENSG00000137200.13	CMTR1	23070	-0.839523	7.51762	22.4835	0.000525503	0.00875301	148.688	150.061	118.751	240.3	257.883
ENSG00000231887.7	PRH1	5554	0.0427261	2.97279	0.0325923	0.85985	0.917654	8.1557	7.6254	7.80755	7.45652	7.81004
ENSG00000132801.7	ZSWIM3	140831	-0.124098	2.95568	0.242805	0.631383	0.761286	8.5404	7.51899	6.115	8.0715	8.07543
ENSG00000208772.1	SNORD94	692225	-2.25113	2.94563	33.7338	9.56824e-05	0.00323269	4.34714	1.34774	3.43969	16.2967	12.5491
ENSG00000175745.14	NR2F1	7025	-0.182784	2.99412	0.430006	0.52478	0.677937	6.19371	6.31312	10.0461	8.7249	8.265
ENSG00000196743.9	GM2A	2760	0.237099	2.95899	0.876149	0.368338	0.541653	8.27111	9.22141	7.04317	7.57183	6.33144
ENSG00000104881.16	PPP1R13L	10848	-0.076729	2.98031	0.077679	0.785374	0.870671	8.30958	5.99392	8.68112	9.45518	6.67266
ENSG00000108448.21	TRIM16L	147166	-0.803613	2.95633	11.355	0.00582784	0.0341835	5.65513	5.85205	6.2242	11.1079	9.51612
ENSG00000162396.6	PARS2	25973	0.200214	2.93527	0.389143	0.544823	0.693408	10.31	8.76034	4.75005	6.4572	7.43092
ENSG00000188315.8	C3orf62	375341	-0.0841983	2.92687	0.0677591	0.799191	0.879552	7.34782	10.0726	4.47706	7.03373	8.53039
ENSG00000128849.10	CGNL1	84952	1.3713	3.00031	20.3087	0.000781468	0.0107341	7.38629	11.5977	12.6668	4.57385	3.56381
ENSG00000129824.16	RPS4Y1	6192	-0.13042	7.55276	0.588302	0.458404	0.622083	172.193	171.625	198.738	203.094	192.787
ENSG00000152439.13	ZNF773	374928	0.0466567	2.97546	0.036153	0.852487	0.913204	7.92487	6.98699	8.79032	8.03306	7.24135
ENSG00000179403.12	VWA1	64856	-0.922716	2.94162	14.8775	0.00242316	0.0204431	5.42431	6.17125	5.13224	10.3776	10.8052
ENSG00000267106.7	ZNF561-AS1	284385	0.505063	2.93222	2.62164	0.132265	0.272379	9.88686	10.3918	5.29603	6.30345	5.76275
ENSG00000204065.3	TCEAL5	340543	1.95228	2.97482	45.4632	2.44914e-05	0.00152002	8.80969	13.442	11.0288	3.07486	2.6539
ENSG00000197620.11	CXorf40A	91966	-0.63853	2.95529	6.40847	0.0269339	0.091857	5.77054	5.92298	7.15237	11.031	8.49247
ENSG00000172733.11	PURG	29942	0.60281	2.99093	4.44802	0.0574058	0.154139	9.88686	6.45499	11.138	6.11128	5.9144
ENSG00000125611.15	CHCHD5	84269	-0.698442	2.94191	8.57187	0.0130658	0.0571399	5.53972	6.41952	6.2788	9.49362	10.2365
ENSG00000180902.18	D2HGDH	728294	-1.12236	2.92846	21.5909	0.000616401	0.00948964	5.65513	5.10724	4.53166	10.8389	11.4118
ENSG00000231304.2	SGO1-AS1	100874028	-0.915439	2.90657	7.08166	0.021274	0.0788083	5.77054	7.58993	2.89371	11.3001	9.32656
ENSG00000277142.1	LINC00235	64493	-0.563702	2.92399	3.73569	0.0780428	0.18942	5.34737	8.44114	5.02304	7.99462	10.6156
ENSG00000095209.12	TMEM38B	55151	0.00110223	7.55099	4.1177e-05	0.994989	0.997157	192.659	172.689	197.209	175.151	199.573
ENSG00000172020.12	GAP43	2596	5.30116	3.06821	119.885	1.82823e-07	9.11017e-05	12.0027	8.83127	20.5289	0.26905	0.417041
ENSG00000119771.15	KLHL29	114818	-2.08818	2.91497	60.7733	6.03767e-06	0.000691931	2.65445	3.79496	3.2213	15.6818	11.7909
ENSG00000132825.7	PPP1R3D	5509	-0.00140155	2.94056	2.94409e-05	0.995763	0.99771	9.11745	7.02246	6.60639	8.1868	7.01387
ENSG00000139718.10	SETD1B	23067	-0.226105	2.98757	0.403759	0.537488	0.687723	6.77077	4.57524	10.8651	10.6467	6.55892
ENSG00000177576.11	C18orf32	497661	0.194105	2.94608	0.648797	0.436744	0.603742	7.96335	8.4766	7.64376	6.64938	7.393
ENSG00000229809.8	ZNF688	146540	-0.744478	2.92556	8.0771	0.0152864	0.0632169	7.23241	5.63925	4.80465	9.1477	10.6535
ENSG00000213930.11	GALT	2592	0.0416806	2.96932	0.0238461	0.879931	0.929355	7.34782	6.59685	9.66389	8.64803	6.59683
ENSG00000162959.13	MEMO1	7795	0.547906	2.9538	4.15535	0.064967	0.167809	10.7332	7.27073	8.35353	5.4963	6.52101
ENSG00000214338.10	SOGA3	387104	0.299563	2.94526	1.33124	0.271806	0.442261	6.69383	9.68248	8.35353	6.53407	6.86222
ENSG00000106829.19	TLE4	7091	1.41809	2.98198	28.1013	0.000210803	0.00510336	10.7717	8.72487	11.957	4.15106	3.67754
ENSG00000129351.17	ILF3	3609	-0.698098	9.70077	14.6404	0.00256002	0.0210855	599.328	716.645	682.751	1066.21	1095.57
ENSG00000176171.11	BNIP3	664	0.174432	7.5268	0.152357	0.703366	0.813624	74.6708	321.473	183.177	218.622	123.672
ENSG00000148123.15	PLPPR1	54886	-0.0314572	2.93595	0.0171656	0.898006	0.940252	7.80946	7.69633	6.98858	7.30278	8.03752
ENSG00000128739.22	SNRPN	6638	0.29392	2.96895	1.001	0.337485	0.510639	9.50216	5.60378	10.1007	6.72625	6.93805
ENSG00000147256.12	ARHGAP36	158763	2.57139	3.07658	20.4815	0.000756426	0.010519	13.0799	3.90137	21.1295	2.34458	1.89564
ENSG00000165194.15	PCDH19	57526	7.7863	3.04994	144.705	6.66353e-08	5.81491e-05	15.0419	7.27073	19.0548	0.0768714	0.0379128
ENSG00000173065.13	FAM222B	55731	-0.488902	2.91548	2.08521	0.175195	0.329313	7.73252	6.70325	4.75005	12.2994	5.72484
ENSG00000203950.6	RTL8A	26071	0.35524	2.94849	1.99207	0.184382	0.341133	7.07853	9.11501	8.95411	6.80312	6.29353
ENSG00000073605.18	GSDMB	55876	0.192167	2.95556	0.38584	0.546507	0.694962	10.387	5.17818	8.73572	6.49563	7.65839
ENSG00000267500.1	ZNF887P	100419709	-0.227268	2.96003	0.642825	0.438807	0.605295	6.23218	5.78111	9.71849	8.99395	7.88587
ENSG00000160200.17	CBS	875	-0.396532	2.94403	2.29056	0.156924	0.305056	6.11677	5.71018	8.51733	8.84021	8.94743
ENSG00000142303.14	ADAMTS10	81794	-0.678718	2.9038	7.23092	0.0202185	0.0760285	6.11677	6.84512	4.85924	9.33987	9.7436
ENSG00000095319.14	NUP188	23511	-0.60741	7.51916	11.0697	0.00629761	0.0358416	150.611	174.71	129.398	241.722	220.236
ENSG00000182993.5	C12orf60	144608	-0.095502	2.92342	0.110851	0.745118	0.844288	9.80992	5.63925	6.44259	7.45652	8.15126
ENSG00000021355.13	SERPINB1	1992	0.0444613	2.91507	0.02639	0.873747	0.925712	9.34827	7.09339	6.1696	6.38033	8.265
ENSG00000129757.13	CDKN1C	1028	-0.80973	2.93935	6.30712	0.027934	0.0939814	5.57819	4.1851	7.80755	12.9144	7.50674
ENSG00000135423.13	GLS2	27165	1.2266	2.92289	17.0986	0.00148397	0.01537	12.6567	9.15047	7.37076	4.45854	3.86711
ENSG00000142252.11	GEMIN7	79760	-0.760562	2.88573	5.74134	0.0344081	0.108346	5.73207	7.8382	3.43969	9.95485	9.40238
ENSG00000227063.5	RPL41P1	22971	-1.64098	2.90004	21.8752	0.000585586	0.00923907	6.11677	2.26989	3.54889	12.2994	12.5491
ENSG00000104267.10	CA2	760	0.828676	2.97124	8.09423	0.0152024	0.0630266	9.00204	7.16433	12.23	5.84223	4.77702
ENSG00000108379.10	WNT3	7473	0.287074	2.8843	0.680005	0.426218	0.59469	8.30958	10.782	4.36786	5.65005	7.24135
ENSG00000151117.9	TMEM86A	144110	-0.306849	2.90721	1.4468	0.25302	0.420505	6.0783	8.19287	6.00581	8.41742	8.34082
ENSG00000173221.14	GLRX	2745	-0.405126	2.92881	2.47347	0.142646	0.285882	6.30912	6.13578	7.58916	10.1855	7.46883
ENSG00000122378.14	PRXL2A	84293	0.0232039	7.54333	0.0195425	0.89122	0.935852	183.08	193.65	186.235	176.804	192.521
ENSG00000153391.15	INO80C	125476	-0.148014	2.91875	0.37479	0.552217	0.699888	7.34782	7.16433	6.98858	8.64803	7.24135
ENSG00000166436.16	TRIM66	9866	0.395541	2.93341	2.39488	0.148571	0.294011	8.88663	7.66086	8.57193	7.26435	5.45945
ENSG00000176842.15	IRX5	10265	0.401663	2.98541	1.30498	0.276338	0.447305	6.53995	6.10032	13.6496	7.14904	6.02814
ENSG00000237298.10	TTN-AS1	100506866	-1.6503	2.85486	8.6918	0.0125866	0.0556545	2.73139	7.69633	0.873572	11.9919	12.17
ENSG00000277149.5	TYW1B	441250	0.280327	2.93687	1.31532	0.274541	0.445142	8.27111	7.34166	8.89952	6.76468	6.67266
ENSG00000162572.21	SCNN1D	6339	-0.887122	2.89131	11.1548	0.00615299	0.0351972	6.61689	5.56831	4.14947	9.76267	10.4639
ENSG00000173825.7	TIGD3	220359	-0.722244	2.88918	7.27073	0.0199475	0.075271	6.03983	6.98699	4.31326	9.60892	9.55403
ENSG00000184788.13	SATL1	340562	0.749636	2.93059	8.8047	0.0121543	0.0543597	7.84793	9.82435	9.3909	5.15038	5.57319
ENSG00000248550.4	OTX2-AS1	100309464	-1.45765	2.88046	27.3047	0.000237923	0.00553579	4.84725	4.78804	3.1121	10.0702	13.4211
ENSG00000067221.14	STOML1	9399	-0.706418	2.88501	6.44568	0.0265775	0.0912135	6.88618	6.45499	4.04027	9.30144	9.70569
ENSG00000185104.20	FAF1	11124	-0.11253	7.55672	0.379758	0.549636	0.697701	166.384	169.461	211.077	210.512	183.612
ENSG00000102287.19	GABRE	2564	0.490894	2.9305	3.76637	0.0769842	0.18769	8.27111	8.29927	9.06331	6.87999	5.26988
ENSG00000165879.9	FRAT1	10023	-0.378395	2.92921	2.00234	0.183339	0.339869	7.00159	5.10724	8.13514	9.03239	8.45456
ENSG00000163611.11	SPICE1	152185	0.530038	2.90272	3.75913	0.0772325	0.188039	7.80946	10.4628	6.98858	6.38033	5.3078
ENSG00000009950.16	MLXIPL	51085	-0.551278	2.90447	4.85341	0.0486126	0.137571	7.30935	5.39098	6.00581	8.91708	9.36447
ENSG00000150687.12	PRSS23	11098	-0.946993	2.87376	8.86443	0.0119328	0.0535826	4.38561	7.7318	3.60348	10.4161	9.93316
ENSG00000166432.15	ZMAT1	84460	0.903597	2.89384	9.00184	0.011441	0.0521576	10.9256	10.0371	6.06041	5.03508	4.62537
ENSG00000184047.19	DIABLO	56616	0.289747	2.94897	0.893822	0.363722	0.537191	8.73275	5.53285	10.5921	5.88066	7.62048
ENSG00000198416.9	ZNF658B	401509	0.297048	2.86161	0.529719	0.481159	0.642609	8.30958	11.4558	3.33049	5.68848	6.93805
ENSG00000254901.8	BORCS8	729991	-0.947424	2.88342	13.6324	0.0032537	0.024149	5.42431	6.13578	4.31326	9.45518	11.0326
ENSG00000276045.3	ORAI1	84876	-0.664638	2.90532	7.53159	0.0182751	0.0714867	6.03983	5.42644	6.55179	9.99328	9.02325
ENSG00000261824.7	LINC00662	148189	0.0673018	7.53701	0.157558	0.698621	0.810225	192.39	195.778	179.082	168.694	192.256
ENSG00000076067.13	RBMS2	5939	-0.386464	2.89149	2.34376	0.152592	0.299622	6.42453	7.34166	5.78742	9.49362	7.58257
ENSG00000110328.6	GALNT18	374378	-1.10345	2.87445	15.3367	0.00218179	0.0192141	4.30867	6.56139	3.93107	11.5691	9.7436
ENSG00000101665.9	SMAD7	4092	-0.229977	2.93553	0.589601	0.457921	0.621689	6.463	5.07177	9.82769	8.76334	7.84796
ENSG00000234585.6	CCT6P3	643180	0.527062	2.96204	2.33852	0.153012	0.300024	8.69428	5.32004	12.5576	6.95686	5.26988
ENSG00000235703.6	LINC00894	100272228	0.437302	2.91221	3.25959	0.0970059	0.220389	8.30958	8.2638	8.40813	6.4572	5.83858
ENSG00000104889.6	RNASEH2A	10535	-0.894861	2.87433	10.905	0.00658911	0.0366546	4.61643	6.95152	4.53166	9.57049	10.4639
ENSG00000214189.9	ZNF788P	388507	-0.919152	2.88898	14.6957	0.00252727	0.0208925	5.34737	5.10724	5.73282	10.8004	9.59195
ENSG00000125675.18	GRIA3	2892	-0.784873	2.89757	9.07971	0.011173	0.0514582	5.65513	4.75257	6.77018	10.9157	8.75786
ENSG00000162627.17	SNX7	51375	2.3656	2.92506	74.5162	2.17524e-06	0.000375209	9.84839	12.0942	11.4656	2.11396	2.19894
ENSG00000175611.12	LINC00476	100128782	0.568237	2.88528	4.64419	0.0529301	0.14572	8.19417	10.0371	6.93398	5.72692	5.6111
ENSG00000187240.16	DYNC2H1	79659	2.64996	7.60603	128.92	1.24024e-07	7.11719e-05	248.403	280.012	352.104	54.0022	39.5052
ENSG00000105696.9	TMEM59L	25789	0.798169	2.95057	3.22934	0.0983922	0.22223	12.0797	3.8659	11.9024	6.76468	3.86711
ENSG00000150672.17	DLG2	1740	0.434179	2.91075	2.8004	0.12097	0.255514	8.38652	7.6254	8.95411	7.1106	5.19406
ENSG00000212747.5	RTL8B	441518	0.0274292	2.87337	0.00946797	0.924146	0.956512	6.69383	9.39874	5.73282	7.87932	6.44518
ENSG00000226328.7	NUP50-DT	100506714	0.253655	2.88369	0.85839	0.373066	0.545786	9.84839	7.34166	6.1696	6.34189	6.74848
ENSG00000252213.1	SNORA74D	109616975	-1.15394	2.88835	18.5619	0.00109789	0.0128894	4.46255	4.3979	5.89661	12.7222	9.09908
ENSG00000250903.9	GMDS-DT	100508120	0.620624	2.88823	4.89563	0.0477937	0.136065	7.57864	10.3564	7.58916	6.49563	4.58745
ENSG00000125434.11	SLC25A35	399512	-0.412955	2.87038	2.54682	0.137384	0.278747	5.96289	7.76726	5.35063	8.53272	8.45456
ENSG00000179041.4	RRS1	23212	-0.36588	2.88401	2.17647	0.166757	0.318544	6.30912	6.80966	6.49719	7.34122	9.51612
ENSG00000166188.2	ZNF319	57567	-0.717968	2.86827	8.511	0.0133173	0.057901	5.88595	6.34859	4.91384	9.45518	9.40238
ENSG00000197380.11	DACT3	147906	0.830306	2.9359	6.57636	0.0253694	0.0883866	10.6178	5.67471	11.411	5.61161	4.7391
ENSG00000107105.15	ELAVL2	1993	0.640534	7.5749	10.9504	0.00650714	0.0364558	192.159	208.759	266.712	137.331	148.125
ENSG00000162522.11	KIAA1522	57648	-0.711792	2.89002	5.20549	0.0422651	0.125029	7.23241	3.8659	6.44259	11.4538	7.65839
ENSG00000172318.5	B3GALT1	8708	1.62371	2.8887	26.7517	0.000259166	0.00583335	7.80946	13.371	8.95411	2.84424	3.67754
ENSG00000233527.9	ZNF529-AS1	101927599	0.618572	2.88971	6.22893	0.0287361	0.0957996	9.11745	8.6894	7.75295	5.381	5.72484
ENSG00000100246.13	DNAL4	10126	-0.88927	2.85441	10.3292	0.00774131	0.0406413	5.27043	6.63232	3.98567	8.87865	10.8431
ENSG00000126790.12	L3HYPDH	112849	-0.304603	2.88309	0.981559	0.342032	0.514784	9.15592	4.71711	6.115	9.30144	7.16553
ENSG00000267322.2	SNHG22	103091864	2.96688	3.0022	46.588	2.18254e-05	0.00141544	7.8864	9.43421	19.71	1.84491	1.28904
ENSG00000104967.7	NOVA2	4858	0.131696	2.91071	0.12478	0.730244	0.83327	8.80969	5.28458	9.11791	9.95485	4.1325
ENSG00000218283.2	MORF4L1P1	326591	0.79304	2.92062	8.1458	0.0149527	0.0624388	7.73252	8.3702	11.0834	5.95753	4.47371
ENSG00000142733.17	MAP3K6	9064	-0.769	2.86256	9.59071	0.00958742	0.0468507	6.03983	5.81658	4.91384	10.4161	8.68204
ENSG00000158859.10	ADAMTS4	9507	-0.249743	2.85712	0.727789	0.410872	0.581096	8.30958	6.88059	4.69545	6.80312	9.02325
ENSG00000166200.15	COPS2	9318	0.849466	7.61199	9.41923	0.0100879	0.0484774	223.012	155.203	335.779	122.879	141.187
ENSG00000186162.10	CIDECP1	152302	0.186119	2.93128	0.278356	0.607725	0.743706	7.8864	4.46884	11.6294	6.49563	7.46883
ENSG00000121005.9	CRISPLD1	83690	1.28572	2.89238	24.8622	0.000350622	0.0069271	8.84816	10.6046	9.4455	3.72826	4.17041
ENSG00000139974.15	SLC38A6	145389	0.409381	2.87541	2.59746	0.133893	0.274534	7.5017	9.22141	7.42536	5.65005	6.48309
ENSG00000173614.14	NMNAT1	64802	0.218628	2.86142	0.62262	0.445905	0.611905	9.07898	8.01553	5.67822	5.99597	7.0897
ENSG00000225855.7	RUSC1-AS1	284618	-0.183515	2.86098	0.460909	0.510519	0.665567	6.0783	8.51207	5.78742	8.49429	6.97596
ENSG00000142961.14	MOB3C	148932	-0.204731	2.84873	0.487369	0.49886	0.657101	6.03983	9.07954	4.91384	7.87932	7.58257
ENSG00000167434.10	CA4	762	1.77249	2.9309	35.8805	7.27012e-05	0.0027601	11.1179	7.9446	12.7214	2.84424	3.33633
ENSG00000188522.15	FAM83G	644815	-0.963833	2.84494	11.1461	0.00616758	0.0352582	4.2702	7.02246	4.04027	10.1086	9.93316
ENSG00000196544.8	BORCS6	54785	-0.979696	2.86771	13.3222	0.00351031	0.0252289	6.27065	3.90137	5.40523	10.0702	10.3881
ENSG00000154134.15	ROBO3	64221	0.278099	2.86271	1.07651	0.320627	0.493413	8.07876	8.79581	6.2788	7.18748	5.57319
ENSG00000060339.14	CCAR1	55749	0.567653	7.55656	10.9258	0.00655134	0.0365437	198.545	219.328	231.169	147.401	144.524
ENSG00000205643.11	CDPF1	150383	-1.12183	2.83435	12.5413	0.0042694	0.0282199	5.84748	5.60378	2.78451	9.41675	11.4118
ENSG00000224081.9	SLC44A3-AS1	101928079	-0.952235	2.84443	12.5726	0.00423544	0.0280782	5.84748	5.78111	3.76728	10.0317	9.93316
ENSG00000109771.15	LRP2BP	55805	0.901517	2.87889	13.0729	0.00373393	0.0261177	8.88663	9.54061	8.40813	4.65072	4.92867
ENSG00000112276.14	BVES	11149	0.91648	2.91596	11.0201	0.00638364	0.0361364	8.27111	7.80273	11.684	4.72759	5.04241
ENSG00000149600.11	COMMD7	149951	-0.646895	2.85567	6.31114	0.0278936	0.0938806	4.92419	6.91606	5.62362	9.8011	8.45456
ENSG00000120256.11	LRP11	84918	0.0930917	2.87223	0.107805	0.748508	0.846235	9.65604	5.63925	6.98858	6.64938	7.27926
ENSG00000183604.14	SMG1P5	595101	-0.699332	2.86147	6.81893	0.0232962	0.0834403	6.00136	5.39098	5.84201	11.377	7.27926
ENSG00000234771.3	SLC25A25-AS1	100289019	-0.250808	2.83093	0.547656	0.47399	0.636247	8.23264	7.7318	3.49429	8.22524	7.31718
ENSG00000114626.18	ABTB1	80325	-0.418547	2.89007	1.59984	0.230747	0.396456	7.117	3.79496	8.57193	9.76267	7.50674
ENSG00000161920.10	MED11	400569	-0.472688	2.83238	2.52437	0.138968	0.280894	5.34737	8.29927	4.53166	7.61027	9.28864
ENSG00000183856.11	IQGAP3	128239	-0.224262	7.56074	1.00773	0.33593	0.508869	188.889	124.737	216.973	206.323	206.777
ENSG00000142794.18	NBPF3	84224	0.479172	2.84403	2.98629	0.110471	0.24018	8.77122	9.22141	5.95121	5.381	6.10397
ENSG00000196998.19	WDR45	11152	-0.409685	2.84951	2.85271	0.117894	0.251093	6.80924	6.31312	5.73282	8.57116	8.15126
ENSG00000256060.3	TRAPPC2B	10597	0.103722	2.87832	0.116433	0.739037	0.840311	9.50216	4.85897	8.13514	6.76468	7.16553
ENSG00000261366.1	MANEA-DT	101927288	1.18817	2.8644	18.3947	0.00113544	0.0130791	10.8101	8.93767	8.13514	3.45921	4.70119
ENSG00000015532.10	XYLT2	64132	-0.289052	2.85035	0.990811	0.339857	0.512628	8.84816	4.92991	5.84201	8.1868	7.81004
ENSG00000071242.12	RPS6KA2	6196	-1.12989	2.82988	18.022	0.00122472	0.0136124	3.96244	5.99392	4.25866	10.6851	10.1227
ENSG00000126243.9	LRFN3	79414	-0.12952	2.84392	0.264177	0.616915	0.750905	7.77099	6.91606	5.78742	7.41809	7.54465
ENSG00000142627.13	EPHA2	1969	2.31279	2.91586	19.4008	0.000930135	0.0118065	17.427	3.8659	11.8478	2.53676	1.89564
ENSG00000168826.16	ZBTB49	166793	0.0912862	2.85941	0.129098	0.725825	0.830304	8.5404	6.38405	7.15237	6.64938	7.16553
ENSG00000267365.1	KCNJ2-AS1	400617	0.0716318	2.84404	0.0640723	0.804602	0.883447	5.65513	9.46968	6.55179	6.61094	7.16553
ENSG00000100201.21	DDX17	10521	-0.263573	9.71056	2.10994	0.172856	0.326128	770.213	726.576	830.003	895.052	967.043
ENSG00000172432.19	GTPBP2	54676	-0.569797	7.52156	11.064	0.00630733	0.0358559	141.417	172.086	148.016	225.387	231.344
ENSG00000149016.16	TUT1	64852	-0.539323	2.83961	3.30927	0.0947803	0.217231	8.19417	4.75257	4.96844	7.72557	9.66777
ENSG00000151615.3	POU4F2	5458	1.74899	2.95295	20.2538	0.000789621	0.010805	9.46369	6.24218	16.6525	3.2286	3.14677
ENSG00000185015.8	CA13	377677	0.351246	2.8381	1.64313	0.224926	0.38921	8.61734	8.6894	5.84201	5.61161	6.52101
ENSG00000157227.13	MMP14	4323	-0.307678	2.83931	1.17916	0.299579	0.471086	8.46346	5.56831	5.29603	7.14904	8.83369
ENSG00000174482.10	LINGO2	158038	0.414604	2.8922	1.68919	0.218945	0.382588	9.11745	5.17818	10.3191	6.91843	5.34571
ENSG00000239389.8	PCDHA13	56136	-0.940348	2.84469	14.9589	0.00237813	0.0201995	5.19349	4.75257	5.62362	10.4929	9.40238
ENSG00000129219.14	PLD2	5338	-0.0487335	2.86359	0.0364088	0.851973	0.912936	7.54017	5.88751	7.91675	6.95686	7.73422
ENSG00000135749.19	PCNX2	80003	0.822751	2.81999	5.66319	0.0354374	0.110649	9.61757	10.7465	4.85924	5.45787	4.09459
ENSG00000273033.2	LINC02035	100129550	0.194038	2.83817	0.544575	0.475208	0.637295	8.57887	7.80273	5.89661	6.41876	6.59683
ENSG00000102878.16	HSF4	3299	-0.876942	2.83788	10.3683	0.00765588	0.0403819	5.11655	5.39098	5.35063	12.0304	7.393
ENSG00000100207.18	TCF20	6942	-0.176892	7.53266	1.01631	0.333964	0.507215	157.113	192.763	177.827	211.243	186.455
ENSG00000171984.15	SHLD1	149840	-0.162418	2.84243	0.386873	0.545979	0.694584	8.11723	5.99392	6.1696	6.87999	8.265
ENSG00000260083.2	MIR762HG	101928736	-0.298937	2.84131	1.47229	0.249115	0.416445	7.34782	6.02938	6.06041	7.91775	8.03752
ENSG00000103343.13	ZNF174	7727	-0.187649	2.85058	0.57816	0.462211	0.62597	6.00136	6.91606	7.37076	8.0715	7.31718
ENSG00000228314.1	CYP4F29P	54055	-1.08012	2.82412	17.5367	0.00135366	0.0145148	5.73207	4.57524	4.14947	11.1079	9.32656
ENSG00000230513.2	THAP7-AS1	439931	-0.169843	2.82328	0.324687	0.579674	0.721902	6.11677	8.54754	5.24143	5.95753	9.02325
ENSG00000175766.13	EIF4E1B	253314	-0.12248	2.85438	0.242802	0.631385	0.761286	7.117	5.99392	7.64376	7.34122	7.69631
ENSG00000105656.13	ELL	8178	-0.654441	2.83653	6.83725	0.023148	0.0830794	6.463	4.85897	5.89661	9.22457	8.83369
ENSG00000251192.7	ZNF674	641339	0.755369	2.83065	7.69779	0.0172964	0.0688287	9.23286	9.43421	6.49719	4.80446	5.15615
ENSG00000184905.9	TCEAL2	140597	1.0929	2.85873	15.4231	0.00213957	0.0190077	7.34782	10.3918	9.66389	4.80446	3.75337
ENSG00000206579.9	XKR4	114786	-0.454764	2.8578	2.68907	0.127855	0.266078	5.84748	4.82351	8.13514	8.7249	8.37874
ENSG00000089154.11	GCN1	10985	-0.317831	7.52089	3.26873	0.0965913	0.219864	187.619	167.191	146.433	205.746	210.833
ENSG00000162777.17	DENND2D	79961	1.78657	2.86421	29.5803	0.00016949	0.00452239	13.7339	7.19979	9.3363	3.19016	2.6539
ENSG00000162927.14	PUS10	150962	0.237605	2.80655	0.519523	0.485319	0.646625	9.3098	8.44114	4.20407	6.14971	6.33144
ENSG00000115828.17	QPCT	25797	2.77134	2.8644	73.1008	2.39732e-06	0.000395841	14.1571	8.83127	9.93688	1.76804	1.44069
ENSG00000188167.9	TMPPE	643853	-0.130635	2.865	0.179504	0.67955	0.796345	7.30935	4.6107	9.00871	8.6096	6.59683
ENSG00000205155.8	PSENEN	55851	-0.792317	2.81868	9.78078	0.00906664	0.0451375	6.23218	5.14271	4.75005	8.57116	10.0848
ENSG00000213801.4	ZNF321P	399669	-0.659896	2.81497	6.64793	0.0247357	0.0870748	6.15524	6.06485	4.64085	8.1868	9.62986
ENSG00000105204.14	DYRK1B	9149	-0.608732	2.82908	5.93745	0.0319788	0.103103	6.0783	5.42644	5.89661	9.95485	7.73422
ENSG00000126106.14	TMEM53	79639	-0.782381	2.81744	8.43718	0.0136301	0.0587004	4.2702	6.66779	5.24143	8.6096	9.97108
ENSG00000134461.16	ANKRD16	54522	-0.775244	2.82125	10.4948	0.00738707	0.0394395	5.27043	5.71018	5.29603	9.18613	9.40238
ENSG00000142327.13	RNPEPL1	57140	-1.38752	2.80365	21.0884	0.000675676	0.00987853	5.88595	3.58216	3.0029	11.1079	10.7672
ENSG00000167766.18	ZNF83	55769	-0.0555373	7.55194	0.0934001	0.765313	0.857166	184.58	158.608	210.913	198.098	185.735
ENSG00000167394.13	ZNF668	79759	-0.858492	2.82956	11.9651	0.00495522	0.0307188	5.57819	4.53977	5.78742	9.263	9.93316
ENSG00000204177.10	BMS1P1	399761	0.175014	2.82262	0.427102	0.526158	0.678862	6.57842	9.07954	6.2788	6.80312	6.17979
ENSG00000100979.15	PLTP	5360	-0.599479	2.82314	5.52303	0.0373775	0.114697	6.92465	5.03631	5.40523	8.64803	8.90952
ENSG00000107954.10	NEURL1	9148	-0.785258	2.82065	10.1994	0.00803302	0.0416366	5.34737	5.56831	5.29603	10.3392	8.30291
ENSG00000114841.17	DNAH1	25981	-0.109768	2.8297	0.201495	0.661788	0.78367	6.38606	7.37713	6.66099	7.68714	7.01387
ENSG00000248508.8	SRP14-AS1	100131089	0.530873	2.82076	3.82606	0.0749744	0.184353	9.00204	8.72487	6.115	5.30413	5.72484
ENSG00000087842.11	PIR	8544	0.182765	2.83573	0.530081	0.481013	0.642461	7.8864	7.09339	7.26157	7.26435	5.80066
ENSG00000110723.12	EXPH5	23086	1.84521	2.88178	28.3585	0.000202835	0.00501193	12.8491	6.20672	11.9024	2.76737	2.9572
ENSG00000167487.12	KLHL26	55295	-1.09001	2.8097	14.4909	0.00265102	0.0215971	6.27065	3.68856	4.31326	11.2617	9.02325
ENSG00000205930.10	C21orf62-AS1	54067	1.03492	2.79867	9.46725	0.00994467	0.0480467	8.42499	11.9524	5.45983	4.57385	3.86711
ENSG00000061676.15	NCKAP1	10787	0.282118	7.54547	2.66603	0.129341	0.267989	218.78	181.307	202.996	166.888	163.746
ENSG00000139835.14	GRTP1	79774	-1.35198	2.81319	25.6764	0.000307205	0.00640581	4.2702	3.61763	4.96844	9.22457	12.5871
ENSG00000215630.6	GUSBP9	100049076	-0.0417226	2.8346	0.0288307	0.868096	0.922533	7.07853	6.27765	7.58916	7.26435	7.0897
ENSG00000105711.12	SCN1B	6324	0.832473	2.8882	6.32094	0.0277952	0.093637	7.54017	6.34859	12.9944	5.4963	4.51163
ENSG00000127419.17	TMEM175	84286	-0.692382	2.80783	6.99004	0.0219546	0.0802778	5.92442	5.71018	4.96844	10.5314	7.393
ENSG00000150636.17	CCDC102B	79839	1.09376	2.7944	9.08694	0.0111485	0.0514252	10.31	10.6756	5.02304	3.15173	5.00449
ENSG00000180423.4	HARBI1	283254	-0.320422	2.80171	1.38048	0.263575	0.432795	7.19394	6.77419	4.75005	6.9953	8.64413
ENSG00000198053.11	SIRPA	140885	-0.768802	2.79297	6.98772	0.0219721	0.0803092	6.19371	6.06485	3.65808	10.2623	7.92378
ENSG00000103066.13	PLA2G15	23659	-0.500316	2.82483	3.83522	0.0746716	0.183901	6.53995	4.89444	6.60639	8.22524	8.75786
ENSG00000109016.17	DHRS7B	25979	-0.502402	2.79841	3.78698	0.0762829	0.186494	6.27065	6.63232	4.69545	8.14837	8.53039
ENSG00000151229.13	SLC2A13	114134	0.0443212	2.84539	0.0210988	0.887003	0.933253	8.27111	4.71711	8.68112	6.22658	7.73422
ENSG00000182199.11	SHMT2	6472	-0.373076	7.56288	2.0676	0.176886	0.331446	176.309	106.543	224.453	208.975	228.842
ENSG00000165675.16	ENOX2	10495	-0.159356	2.783	0.218359	0.64895	0.774448	5.53972	9.71795	4.09487	6.80312	7.69631
ENSG00000240668.1	KRT8P36	100418748	0.330552	2.9462	0.267599	0.614669	0.749137	5.3089	2.05708	18.0174	8.0715	5.19406
ENSG00000069943.10	PIGB	9488	0.130409	2.8181	0.266093	0.615655	0.749811	7.57864	7.19979	6.87938	5.76535	7.43092
ENSG00000125971.16	DYNLRB1	83658	-0.263627	2.82198	1.06363	0.323415	0.496257	7.23241	5.32004	6.87938	7.5334	7.99961
ENSG00000163909.8	HEYL	26508	0.147238	2.82214	0.343334	0.569138	0.71347	7.42476	7.09339	7.31617	7.37965	5.76275
ENSG00000238961.1	SNORA47	677828	-1.65032	2.79909	31.2505	0.000133756	0.00394645	4.61643	2.55362	3.93107	13.0681	10.1227
ENSG00000253716.6	MINCR	100507316	0.115068	2.81012	0.210261	0.655035	0.778913	7.96335	7.23526	6.2242	6.61094	6.59683
ENSG00000124602.10	UNC5CL	222643	-0.245508	2.80349	0.826338	0.381834	0.553678	7.96335	5.85205	5.40523	6.87999	8.34082
ENSG00000134463.15	ECHDC3	79746	-0.940166	2.78993	12.2301	0.00462475	0.0294869	5.65513	5.21364	4.04027	8.10993	11.0326
ENSG00000166448.14	TMEM130	222865	1.20038	2.82147	20.3707	0.000772367	0.0106619	10.0023	9.18594	7.91675	4.3048	3.56381
ENSG00000164904.18	ALDH7A1	501	-0.0603604	7.53131	0.132191	0.722711	0.828151	176.848	190.99	177.554	196.176	182.967
ENSG00000172663.9	TMEM134	80194	-0.790466	2.80002	7.54301	0.0182058	0.071297	7.19394	4.14963	4.58625	9.53205	8.8716
ENSG00000079691.18	CARMIL1	55604	-0.937977	2.80317	14.2387	0.00281327	0.0221972	5.00113	4.46884	5.67822	9.1477	10.1606
ENSG00000118690.13	ARMC2	84071	-0.119746	2.79151	0.187929	0.672599	0.791612	6.15524	8.1574	5.45983	8.14837	6.2177
ENSG00000171714.11	ANO5	203859	8.11564	2.85558	203.338	1.04092e-08	2.07479e-05	16.0806	8.3702	11.4656	0.0384357	0.0379128
ENSG00000172339.10	ALG14	199857	-0.140835	2.77867	0.216314	0.650473	0.775647	6.11677	8.83127	4.47706	7.1106	7.24135
ENSG00000062096.15	ARSF	416	-0.330897	2.77307	0.859885	0.372664	0.545376	4.19326	9.68248	4.36786	7.95619	7.43092
ENSG00000140398.14	NEIL1	79661	-0.743732	2.77807	7.03456	0.0216207	0.079625	5.53972	6.38405	3.98567	7.68714	10.1606
ENSG00000170175.11	CHRNB1	1140	0.396848	2.82756	2.08618	0.175102	0.329193	7.5017	7.12886	8.73572	7.1106	4.70119
ENSG00000124120.11	TTPAL	79183	0.0831861	2.75398	0.0368839	0.851023	0.912359	5.11655	11.8105	3.33049	5.68848	7.16553
ENSG00000211455.8	STK38L	23012	0.671148	2.78719	4.95416	0.0466856	0.13387	8.96357	9.32781	5.67822	4.22793	5.83858
ENSG00000244462.8	RBM12	10137	-0.0794099	7.53341	0.204829	0.659199	0.781946	160.152	196.097	186.999	180.917	201.734
ENSG00000158480.11	SPATA2	9825	-0.327387	2.81195	1.51301	0.243046	0.410044	7.117	4.82351	6.98858	7.84088	7.9617
ENSG00000160226.16	CFAP410	755	-0.715781	2.79514	8.72464	0.012459	0.0552351	5.73207	5.00084	5.62362	8.87865	9.02325
ENSG00000167065.13	DUSP18	150290	-0.0903803	2.79274	0.112816	0.742958	0.842633	5.77054	8.051	6.1696	7.99462	6.2177
ENSG00000171813.14	PWWP2B	170394	-1.33763	2.78512	28.5401	0.000197422	0.00491883	4.42408	3.7595	4.47706	11.646	9.66777
ENSG00000235531.11	MSC-AS1	100132891	11.2413	2.86708	286.678	5.15803e-09	1.80875e-05	11.8488	10.4982	14.0318	0	0
ENSG00000075234.17	TTC38	55020	-0.43552	2.79324	3.25925	0.0970212	0.220392	5.92442	6.06485	6.00581	8.49429	7.73422
ENSG00000186056.10	MATN1-AS1	100129196	0.560588	2.80508	3.0202	0.10868	0.237612	11.3487	5.56831	6.87938	5.18882	5.57319
ENSG00000077150.20	NFKB2	4791	0.39845	2.81959	1.8078	0.204476	0.366737	8.5404	6.13578	8.57193	7.26435	4.47371
ENSG00000107187.17	LHX3	8022	0.000951834	2.80642	1.07922e-05	0.997435	0.998678	8.69428	5.03631	7.04317	7.6487	6.17979
ENSG00000110881.11	ASIC1	41	-0.194148	2.7949	0.424732	0.527288	0.679966	5.23196	7.55446	6.66099	9.33987	5.49736
ENSG00000130164.14	LDLR	3949	-0.770099	7.55006	9.78584	0.00905325	0.0450878	117.065	115.8	205.617	266.628	231.609
ENSG00000127399.15	LRRC61	65999	-0.952424	2.77526	13.9297	0.00302829	0.0231365	5.61666	4.92991	4.14947	10.1855	8.83369
ENSG00000129646.14	QRICH2	84074	-0.702398	2.75872	4.93503	0.0470443	0.134576	5.53972	7.12886	3.2213	8.80177	8.5683
ENSG00000164543.7	STK17A	9263	1.78947	2.8734	25.1709	0.000333365	0.0067043	9.92533	6.77419	13.9772	3.57452	2.31268
ENSG00000068383.19	INPP5A	3632	-0.961853	2.75555	9.22445	0.0106943	0.0501163	4.73184	6.63232	3.0029	8.76334	10.0469
ENSG00000151881.14	TMEM267	64417	0.131883	2.76588	0.17483	0.683491	0.79898	8.19417	8.2638	4.31326	5.68848	7.01387
ENSG00000146950.13	SHROOM2	357	-0.362747	2.80676	1.22705	0.290424	0.461096	8.04029	3.58216	7.04317	7.91775	8.03752
ENSG00000147010.18	SH3KBP1	30011	0.739212	2.83328	6.9159	0.0225242	0.0816146	8.61734	6.38405	10.3191	5.15038	4.92867
ENSG00000225511.7	LINC00475	158314	1.1278	2.84418	14.3347	0.00275014	0.022033	9.34827	6.63232	11.411	4.49698	3.8292
ENSG00000244625.7	MIATNB	102724827	-0.277113	2.80137	1.21901	0.291934	0.462529	5.88595	5.99392	7.20697	8.26367	7.12761
ENSG00000198205.6	ZXDA	7789	-0.284318	2.80035	1.26837	0.282834	0.45402	6.57842	5.35551	7.09777	7.72557	7.69631
ENSG00000174010.9	KLHL15	80311	0.524345	7.62583	1.83795	0.200999	0.362166	198.199	103.67	373.07	156.856	155.784
ENSG00000027869.11	SH2D2A	9047	0.316537	2.77078	1.26492	0.283458	0.454545	8.00182	8.583	5.29603	5.72692	6.02814
ENSG00000239900.12	ADSL	158	-0.00629025	2.77726	0.000572557	0.981317	0.989893	6.53995	7.90913	5.78742	6.11128	7.46883
ENSG00000230314.7	ELOVL2-AS1	100506409	0.0732707	2.78142	0.079171	0.78338	0.869566	6.30912	8.12193	6.3334	7.18748	5.99023
ENSG00000106733.21	NMRK1	54981	0.35226	2.77947	1.29552	0.277997	0.448834	10.4639	6.10032	5.67822	5.72692	5.9144
ENSG00000108187.16	PBLD	64081	-0.453982	2.77242	3.18445	0.100496	0.22549	5.77054	6.52592	5.29603	7.14904	8.94743
ENSG00000177105.10	RHOG	391	-0.361948	2.81184	1.29625	0.277869	0.44875	6.463	4.0787	8.24434	9.33987	6.67266
ENSG00000147439.13	BIN3	55909	-0.585865	2.77575	5.81782	0.0334353	0.106441	5.46278	5.85205	5.56902	7.95619	8.94743
ENSG00000182318.6	ZSCAN22	342945	-0.374381	2.77477	1.93589	0.190225	0.348102	5.07808	7.23526	5.78742	8.84021	6.82431
ENSG00000186998.16	EMID1	129080	-0.843165	2.76935	8.97666	0.0115293	0.0524536	6.69383	4.11417	4.47706	8.45585	9.85734
ENSG00000279873.2	LINC01126	100129726	-0.890877	2.76078	12.2911	0.0045524	0.0292433	4.73184	5.85205	4.31326	9.30144	9.17491
ENSG00000129167.9	TPH1	7166	1.37302	9.71863	42.2316	3.45644e-05	0.00181302	1016.96	1226.84	1106.38	368.214	494.08
ENSG00000131127.14	ZNF141	7700	0.308675	7.52513	2.90507	0.114913	0.246764	208.701	210.816	178.918	144.71	177.432
ENSG00000078804.13	TP53INP2	58476	0.315926	2.83311	0.807896	0.387022	0.55891	6.38606	5.60378	11.138	7.80245	4.51163
ENSG00000196839.13	ADA	100	-0.49598	2.78158	3.07695	0.105762	0.233206	7.27088	4.1851	6.06041	8.03306	8.41665
ENSG00000261794.1	GOLGA8H	728498	0.11141	2.81081	0.160508	0.69597	0.808248	6.42453	5.85205	9.2817	6.87999	6.36936
ENSG00000099617.4	EFNA2	1943	-0.690193	2.76446	7.82747	0.0165758	0.0666711	5.00113	5.99392	5.13224	8.99395	8.37874
ENSG00000119650.12	IFT43	112752	-0.573967	2.7465	4.03493	0.0684264	0.173916	5.6936	6.95152	3.87648	8.10993	8.37874
ENSG00000269743.3	SLC25A53	401612	0.527056	2.80278	3.3728	0.0920253	0.212859	6.00136	8.22833	9.4455	6.22658	4.70119
ENSG00000164162.14	ANAPC10	10393	0.824647	2.80922	8.77454	0.0122681	0.0546774	7.96335	7.34166	9.99148	3.99731	5.49736
ENSG00000079102.16	RUNX1T1	862	0.254462	2.78181	0.862917	0.371852	0.544765	6.30912	7.87366	7.64376	7.26435	4.92867
ENSG00000079335.20	CDC14A	8556	0.0551813	2.78575	0.0486934	0.829189	0.899376	6.30912	6.73872	7.75295	6.91843	6.40727
ENSG00000158458.20	NRG2	9542	-0.226237	2.79486	0.590691	0.457516	0.621276	6.69383	4.57524	8.08054	6.53407	8.49247
ENSG00000051825.15	MPHOSPH9	10198	0.300386	7.54695	2.9584	0.111972	0.242299	207.739	179.108	219.594	162.852	165.414
ENSG00000164967.10	RPP25L	138716	-0.6958	2.7463	6.53209	0.0257712	0.0892658	6.23218	5.67471	3.93107	8.99395	8.18917
ENSG00000188234.13	AGAP4	119016	-0.130058	2.76918	0.284136	0.604066	0.740794	6.65536	6.52592	6.2788	7.45652	6.74848
ENSG00000088992.18	TESC	54997	-1.10843	2.76857	15.4548	0.00212434	0.01895	3.42385	4.46884	5.95121	9.33987	10.4639
ENSG00000005020.13	SKAP2	8935	2.53279	2.72448	22.729	0.000503337	0.00850222	6.69383	17.1305	5.29603	2.30614	1.06156
ENSG00000104863.12	LIN7B	64130	0.115573	2.78723	0.181776	0.677657	0.79503	7.00159	5.99392	8.18974	5.4963	7.50674
ENSG00000215375.6	MYL5	4636	-0.940878	2.75074	13.2024	0.00361571	0.0256677	5.88595	4.32697	4.31326	9.30144	9.32656
ENSG00000169783.12	LINGO1	84894	-0.25073	2.78438	0.67568	0.427652	0.595711	6.88618	4.46884	7.69835	9.03239	6.02814
ENSG00000170430.10	MGMT	4255	-0.944768	2.74645	14.3397	0.00274696	0.022033	5.46278	4.68164	4.31326	9.60892	8.98534
ENSG00000253320.7	AZIN1-AS1	100506753	0.221687	2.77665	0.766243	0.399146	0.570222	7.73252	6.31312	7.53456	5.80379	6.52101
ENSG00000226210.3	WASH8P	100288778	-0.239323	2.76631	0.883593	0.366383	0.539751	5.84748	6.20672	6.77018	6.4572	8.34082
ENSG00000106701.12	FSD1L	83856	0.198729	7.52185	1.20845	0.293932	0.464855	177.156	222.342	181.485	159.47	178.039
ENSG00000110076.19	NRXN2	9379	0.302605	2.78375	1.35501	0.267789	0.437736	7.19394	6.45499	8.51733	6.4572	5.49736
ENSG00000110492.15	MDK	4192	0.199484	2.78907	0.308989	0.588863	0.729431	9.69451	3.7595	8.24434	6.38033	6.17979
ENSG00000122547.11	EEPD1	80820	-0.374832	2.77072	1.98449	0.185157	0.341967	6.0783	5.10724	6.93398	8.91708	6.71057
ENSG00000174680.10	GRIK1-AS1	642976	0.819686	2.78838	3.85445	0.0740409	0.182824	12.5413	4.0787	8.24434	3.61296	5.76275
ENSG00000228623.6	ZNF883	169834	-0.371957	2.7405	1.95867	0.187827	0.345095	6.34759	6.70325	4.58625	8.03306	7.24135
ENSG00000185664.14	PMEL	6490	-0.235096	2.74775	0.89862	0.362484	0.536253	6.11677	6.80966	5.62362	7.1106	7.46883
ENSG00000224914.4	LINC00863	439994	0.0420203	2.72854	0.0181781	0.895061	0.938044	6.463	8.86674	4.42246	5.80379	7.05179
ENSG00000126709.15	IFI6	2537	0.296011	2.7484	1.28632	0.279623	0.450379	6.84771	8.40567	6.2242	6.11128	5.57319
ENSG00000140043.11	PTGR2	145482	0.916274	2.7471	10.8837	0.00662794	0.0368335	8.5404	9.54061	6.388	4.11262	4.54954
ENSG00000185043.12	CIB1	10519	0.571261	2.7811	1.97556	0.186075	0.343027	12.0027	3.6531	7.86215	5.30413	5.23197
ENSG00000157851.17	DPYSL5	56896	-0.700151	7.49824	13.9957	0.00298079	0.0229004	140.186	171.979	121.481	236.994	232.823
ENSG00000237854.3	LINC00674	100499466	0.242754	2.77816	0.785709	0.393408	0.564904	6.96312	6.38405	8.40813	7.18748	5.04241
ENSG00000164929.17	BAALC	79870	-0.747812	2.72958	6.00025	0.0312446	0.101447	3.96244	6.98699	4.42246	7.22591	10.0469
ENSG00000025434.19	NR1H3	10062	-0.133387	2.74363	0.213111	0.652878	0.777068	8.5404	5.17818	5.35063	6.76468	7.20344
ENSG00000135525.18	MAP7	9053	0.0956136	2.78416	0.111815	0.744056	0.843345	6.463	5.39098	9.22711	6.49563	6.59683
ENSG00000095203.14	EPB41L4B	54566	0.341413	2.76334	1.69192	0.218597	0.382166	6.7323	7.37713	7.91675	6.64938	4.92867
ENSG00000122359.18	ANXA11	311	-0.499322	2.72591	3.41103	0.090415	0.210192	5.73207	6.63232	4.36786	7.22591	8.60621
ENSG00000146411.6	SLC2A12	154091	0.563162	2.74125	3.96717	0.0704712	0.17723	6.61689	9.61155	6.49719	5.61161	4.66328
ENSG00000144455.14	SUMF1	285362	-0.561544	2.7287	4.70763	0.0515738	0.143151	6.11677	5.78111	4.53166	7.49496	8.71995
ENSG00000213185.7	FAM24B	196792	0.195421	2.78532	0.422808	0.528208	0.680566	7.04006	5.07177	9.55469	5.88066	6.67266
ENSG00000001631.15	KRIT1	889	0.354582	2.7329	1.73424	0.213295	0.375828	7.69405	8.051	5.78742	5.11195	6.14188
ENSG00000171988.19	JMJD1C	221037	-0.00685371	7.5271	0.00174269	0.967412	0.98211	180.118	185.989	185.962	180.609	189.185
ENSG00000041880.14	PARP3	10039	-0.265851	2.72385	0.890499	0.364584	0.537983	5.15502	7.90913	4.96844	7.18748	7.31718
ENSG00000185686.18	PRAME	23532	1.18117	2.76238	17.4965	0.00136504	0.0145672	10.5793	7.19979	8.18974	3.49765	4.1325
ENSG00000173926.6	MARCHF3	115123	-0.286765	2.76093	0.976673	0.343189	0.516136	5.77054	4.96537	7.80755	8.87865	6.14188
ENSG00000260075.1	NSFP1	728806	0.405698	2.75675	2.5029	0.140505	0.282982	6.80924	7.37713	8.08054	6.14971	5.04241
ENSG00000144199.11	FAHD2B	151313	0.253005	2.73875	1.01269	0.334792	0.507808	7.80946	6.88059	6.44259	5.84223	5.99023
ENSG00000185829.17	ARL17A	51326	0.781292	2.74009	8.89468	0.0118224	0.0533003	8.34805	8.44114	6.98858	4.18949	5.04241
ENSG00000168237.18	GLYCTK	132158	-0.835835	2.72142	11.4609	0.00566411	0.0336025	5.27043	4.96537	4.58625	8.26367	9.40238
ENSG00000182158.15	CREB3L2	64764	-0.181378	2.74464	0.484214	0.500225	0.658125	6.03983	5.95845	6.87938	8.22524	6.02814
ENSG00000286532.1	PARTICL	100630918	-0.20708	2.72595	0.681012	0.425885	0.594468	6.53995	6.52592	5.35063	7.26435	6.93805
ENSG00000162302.13	RPS6KA4	8986	-0.575127	2.73974	4.16499	0.0646996	0.167264	6.50148	4.00777	6.06041	8.95552	7.46883
ENSG00000120063.10	GNA13	10672	0.915813	7.59232	13.8613	0.00307851	0.0234006	201.661	183.542	327.753	124.455	127.387
ENSG00000188185.12	LINC00265	349114	0.15832	2.7399	0.33429	0.574198	0.717657	7.61711	6.38405	6.66099	7.41809	4.92867
ENSG00000176428.6	VPS37D	155382	-0.666305	2.76341	3.38017	0.0917123	0.212397	5.34737	2.94376	8.13514	9.53205	7.69631
ENSG00000139239.7	RPL14P1	144581	-0.359615	2.73265	2.0381	0.179766	0.335256	6.11677	5.46191	6.115	8.37898	6.74848
ENSG00000155099.8	PIP4P2	55529	1.54391	2.78014	30.2419	0.000154136	0.00426046	8.96357	7.76726	11.0834	3.34391	2.99511
ENSG00000185100.10	ADSS1	122622	-0.110446	2.74748	0.144953	0.710287	0.818936	7.54017	4.53977	7.26157	6.26502	7.62048
ENSG00000040531.15	CTNS	1497	-0.0744211	2.71124	0.0723903	0.792614	0.875212	6.57842	7.48353	4.85924	7.34122	5.99023
ENSG00000132967.9	HMGB1P5	10354	-0.730884	2.74079	6.53454	0.0257488	0.0892424	5.07808	3.93683	6.71559	7.72557	9.59195
ENSG00000046647.13	GEMIN8	54960	-0.202986	2.72826	0.6417	0.439197	0.605686	5.42431	6.70325	6.388	7.61027	6.59683
ENSG00000159445.13	THEM4	117145	-0.847503	2.67794	4.23664	0.0627517	0.163585	4.03938	7.8382	2.29313	7.03373	10.1606
ENSG00000175727.14	MLXIP	22877	-0.0856716	2.74761	0.0917044	0.767383	0.858714	7.117	4.78804	7.58916	7.61027	6.14188
ENSG00000053438.11	NNAT	4826	-0.637335	7.51696	12.41	0.00441521	0.0287598	124.682	163.148	161.556	235.572	230.396
ENSG00000206633.1	SNORA80B	100302743	-2.85588	2.69104	76.4672	1.90747e-06	0.000345637	2.61598	1.17041	1.63795	12.9144	13.3453
ENSG00000020181.18	ADGRA2	25960	-0.490585	2.70374	3.25883	0.0970404	0.220392	5.3089	6.84512	4.36786	8.0715	7.46883
ENSG00000256806.6	C17orf100	388327	-0.0838417	2.69682	0.0731734	0.791524	0.87444	5.92442	8.51207	4.20407	6.38033	6.86222
ENSG00000163485.17	ADORA1	134	0.29225	2.73125	1.26096	0.284176	0.455123	8.27111	6.20672	6.77018	5.99597	5.57319
ENSG00000212402.1	SNORA74B	677841	-1.2858	2.7143	20.5951	0.000740489	0.0104448	5.00113	2.90829	4.42246	10.3008	9.70569
ENSG00000280594.1	BTG3-AS1	110806272	0.166678	2.70851	0.354415	0.56306	0.708873	8.07876	7.12886	4.96844	5.99597	6.02814
ENSG00000124588.20	NQO2	4835	-1.13905	2.69558	18.0753	0.00121146	0.0134984	4.19326	5.17818	3.49429	10.3392	8.64413
ENSG00000135124.14	P2RX4	5025	0.262944	2.71688	1.0369	0.329314	0.502046	7.15547	7.6254	6.06041	5.34256	6.25562
ENSG00000175093.5	SPSB4	92369	-0.166755	2.75035	0.320788	0.581927	0.724	6.30912	4.5043	8.29893	6.72625	7.50674
ENSG00000134253.10	TRIM45	80263	-0.161656	2.6772	0.182956	0.676679	0.794538	7.00159	8.12193	2.78451	6.30345	7.16553
ENSG00000010256.11	UQCRC1	7384	-0.808788	7.51233	23.8472	0.000415255	0.0075813	142.263	129.809	148.835	245.373	246.13
ENSG00000188542.9	DUSP28	285193	-0.105911	2.71149	0.173211	0.684871	0.799927	6.27065	6.95152	5.56902	6.26502	7.24135
ENSG00000114859.16	CLCN2	1181	-0.393555	2.71493	2.46389	0.143352	0.286881	6.00136	5.63925	5.62362	8.37898	6.74848
ENSG00000115841.20	RMDN2	151393	1.12297	2.73918	18.6525	0.00107817	0.0127817	8.80969	8.051	8.46273	3.53608	4.20832
ENSG00000257446.4	ZNF878	729747	-1.19786	2.69857	21.75	0.000598923	0.00935081	4.19326	4.53977	3.87648	10.9542	8.37874
ENSG00000197816.15	CCDC180	100499483	0.127597	2.68951	0.171573	0.686275	0.800899	6.96312	8.44114	4.25866	5.99597	6.06605
ENSG00000104524.14	PYCR3	65263	-1.28248	2.67615	15.662	0.00202787	0.0184379	5.00113	4.64617	2.23853	9.91641	9.55403
ENSG00000182362.14	YBEY	54059	-0.173852	2.69448	0.405575	0.536591	0.687073	6.19371	7.27073	4.69545	7.26435	6.44518
ENSG00000285533.2	RELA-DT	105369347	0.0194528	2.71062	0.00512567	0.944145	0.968826	8.1557	5.63925	5.67822	6.34189	6.48309
ENSG00000164708.6	PGAM2	5224	0.132832	2.72835	0.197103	0.665238	0.786561	7.92487	5.21364	7.26157	7.57183	4.81493
ENSG00000231007.5	CDC20P1	157956	0.130919	2.7427	0.21081	0.654619	0.778572	6.88618	5.14271	8.62652	6.72625	5.80066
ENSG00000125676.20	THOC2	57187	0.323367	7.52822	3.81541	0.0753282	0.184934	195.044	204.964	201.904	158.278	162.419
ENSG00000156500.15	FAM122C	159091	0.663536	2.73657	4.89491	0.0478075	0.136065	9.61757	5.39098	8.24434	4.65072	5.11823
ENSG00000197291.9	RAMP2-AS1	100190938	0.653873	2.68233	3.98525	0.0699184	0.176133	7.5017	10.0017	4.64085	4.65072	4.77702
ENSG00000018869.16	ZNF582	147948	-0.145184	2.70224	0.314409	0.585656	0.727114	5.46278	7.16433	5.84201	7.26435	6.36936
ENSG00000145088.9	EAF2	55840	1.13612	2.74213	15.9216	0.0019141	0.0179399	9.84839	6.45499	9.17251	3.92044	3.79128
ENSG00000186222.5	BLOC1S4	55330	-0.397015	2.70431	2.44531	0.144734	0.288639	6.42453	5.17818	5.51442	6.95686	8.07543
ENSG00000112699.11	GMDS	2762	-0.00614776	2.685	0.000399359	0.984396	0.99165	5.57819	8.44114	4.91384	7.49496	5.23197
ENSG00000174576.10	NPAS4	266743	0.0957416	2.72724	0.0901575	0.76929	0.859725	8.07876	4.53977	7.58916	7.61027	4.96658
ENSG00000248008.3	NRAV	100506668	0.293835	2.6851	0.603749	0.452707	0.617206	3.96244	10.8529	5.67822	5.45787	5.72484
ENSG00000146556.14	WASH2P	375260	-0.381562	2.69092	1.98019	0.185598	0.342465	7.07853	5.17818	4.75005	6.95686	7.84796
ENSG00000159079.19	CFAP298	56683	-0.128188	2.68762	0.2307	0.639936	0.768343	5.80901	7.44806	5.07764	6.76468	6.63475
ENSG00000103342.13	GSPT1	2935	0.064643	7.51933	0.145511	0.709758	0.818485	177.079	196.097	186.781	189.603	167.347
ENSG00000166171.13	DPCD	25911	-0.70654	2.69902	7.90569	0.0161584	0.0656249	4.42408	5.35551	5.56902	8.45585	8.22708
ENSG00000205464.12	ATP6AP1L	92270	0.704143	2.67106	4.11281	0.0661644	0.169949	8.30958	9.71795	4.14947	4.65072	4.47371
ENSG00000160271.16	RALGDS	5900	-0.00685652	2.70068	0.00067948	0.979647	0.989465	6.23218	6.80966	6.1696	7.49496	5.38362
ENSG00000169239.13	CA5B	11238	-0.160525	2.70816	0.417369	0.530827	0.682519	5.73207	6.06485	6.71559	6.68781	7.0897
ENSG00000250510.8	GPR162	27239	-0.644361	2.68278	5.86006	0.0329122	0.105126	6.15524	5.14271	4.14947	8.53272	7.62048
ENSG00000056558.11	TRAF1	7185	-1.1778	2.6802	22.5928	0.000515497	0.00861837	4.42408	4.25603	3.87648	10.0317	8.94743
ENSG00000100209.10	HSCB	150274	-0.137676	2.70029	0.260845	0.61912	0.752415	7.04006	5.46191	6.00581	5.68848	7.88587
ENSG00000234912.12	SNHG20	654434	0.384653	2.68821	1.88248	0.196005	0.355741	8.1557	7.44806	5.40523	4.80446	5.95231
ENSG00000073464.12	CLCN4	1183	0.224316	2.65203	0.317895	0.583612	0.725574	6.34759	10.1081	3.1121	5.30413	5.95231
ENSG00000155970.12	MICU3	286097	0.696618	2.70895	7.39112	0.019154	0.0734354	7.54017	7.8382	7.53456	4.26636	5.15615
ENSG00000048540.15	LMO3	55885	-0.119369	9.68985	0.360041	0.560024	0.706625	827.418	701.891	865.601	758.183	976.104
ENSG00000100503.24	NIN	51199	0.0253282	7.51029	0.016357	0.900423	0.942287	148.803	223.548	178.154	179.533	181.11
ENSG00000101888.11	NXT2	55916	0.474741	2.68969	2.61444	0.132747	0.2731	6.42453	8.79581	6.2788	4.11262	6.2177
ENSG00000138083.5	SIX3	6496	-0.0964107	2.72787	0.0953715	0.762933	0.855926	6.50148	4.14963	8.57193	6.68781	6.93805
ENSG00000185269.12	NOTUM	147111	-0.381949	2.69107	2.45276	0.144178	0.287962	5.6936	5.67471	5.67822	7.49496	7.31718
ENSG00000116652.6	DLEU2L	79469	0.437597	2.70086	2.5475	0.137337	0.278747	8.04029	6.56139	6.93398	4.34323	6.25562
ENSG00000145476.16	CYP4V2	285440	0.35032	2.66338	1.06312	0.323525	0.496353	5.84748	10.0371	4.53166	5.80379	4.92867
ENSG00000257365.8	FNTB	2342	-0.122648	2.68296	0.224258	0.644603	0.771709	5.80901	7.05792	5.45983	7.14904	6.17979
ENSG00000087008.16	ACOX3	8310	-0.915131	2.67167	12.4317	0.00439068	0.0286833	5.50125	4.43337	3.93107	8.80177	8.68204
ENSG00000147724.12	FAM135B	51059	-0.481701	2.65528	1.48935	0.246547	0.413657	3.19303	9.00861	3.76728	7.91775	7.05179
ENSG00000167306.20	MYO5B	4645	-0.309414	2.72456	0.911673	0.359147	0.533096	5.65513	3.83043	8.51733	7.18748	7.58257
ENSG00000163702.20	IL17RC	84818	-0.617504	2.67027	4.8933	0.0478384	0.136132	6.30912	5.00084	4.14947	6.80312	9.06117
ENSG00000212232.1	SNORD17	692086	-0.791689	7.50633	8.85611	0.0119634	0.0536393	189.505	96.5765	135.731	292.188	194.607
ENSG00000258947.7	TUBB3	10381	-0.984156	2.68243	15.2044	0.00224828	0.0195358	4.77031	3.9723	4.91384	9.49362	8.49247
ENSG00000259593.1	MTND5P40	107075256	-0.125625	2.65786	0.12044	0.734773	0.836806	4.30867	9.39874	4.20407	7.37965	5.72484
ENSG00000267221.3	C17orf113	110806298	0.103282	2.66855	0.100215	0.757196	0.852315	8.77122	6.24218	4.25866	5.03508	6.97596
ENSG00000236240.1	GPC5-IT1	100874293	1.09201	2.6821	14.0122	0.00296905	0.022869	7.117	10.2854	6.71559	3.53608	4.01876
ENSG00000170667.14	RASA4B	100271927	-0.897895	2.66647	12.9144	0.00388483	0.0266958	4.6549	5.10724	4.14947	8.49429	8.83369
ENSG00000204172.12	AGAP9	642517	-0.38076	2.68121	2.32187	0.154356	0.301698	6.0783	5.39098	5.45983	7.87932	6.82431
ENSG00000161618.10	ALDH16A1	126133	-0.704771	2.66996	7.92312	0.016067	0.0653626	4.6549	5.60378	4.75005	7.91775	8.41665
ENSG00000100299.18	ARSA	410	-1.28734	2.64872	19.1367	0.000979475	0.0121513	3.34691	5.32004	3.0029	9.1477	9.97108
ENSG00000181619.11	GPR135	64582	0.316098	2.67038	1.35887	0.267145	0.437022	7.30935	7.69633	5.40523	5.84223	5.11823
ENSG00000165644.11	COMTD1	118881	-1.0332	2.68002	15.1605	0.00227088	0.0196546	4.30867	3.68856	5.40523	9.60892	8.60621
ENSG00000145241.11	CENPC	1060	0.657684	7.57695	6.19819	0.0290589	0.0964276	220.358	145.663	305.04	136.946	146.533
ENSG00000215126.10	CBWD6	644019	-0.384938	2.66705	2.27509	0.158213	0.306765	6.15524	5.74565	4.80465	6.91843	7.65839
ENSG00000106992.19	AK1	203	-0.539532	2.65683	3.8854	0.073039	0.181199	6.0783	5.60378	4.04027	6.91843	8.37874
ENSG00000179859.9	RNF227	284023	-0.213862	2.67883	0.639537	0.439949	0.60641	4.6549	6.73872	6.44259	6.95686	6.82431
ENSG00000159714.11	ZDHHC1	29800	-0.635199	2.65388	5.35019	0.0399482	0.120483	5.6936	5.49738	3.98567	8.95552	6.82431
ENSG00000178078.11	STAP2	55620	-0.320335	2.65286	1.38645	0.262601	0.431589	6.42453	6.17125	4.25866	7.14904	6.93805
ENSG00000183196.10	CHST6	4166	0.721686	2.67433	5.97055	0.0315894	0.102197	9.77145	6.49045	6.1696	4.11262	4.96658
ENSG00000185436.12	IFNLR1	163702	0.163565	2.69509	0.313892	0.58596	0.727323	7.80946	4.71711	7.58916	5.53474	6.40727
ENSG00000185742.7	C11orf87	399947	0.367454	2.72044	1.34822	0.268929	0.439173	6.65536	5.03631	9.93688	6.11128	5.00449
ENSG00000186312.10	CA5BP1	340591	-0.265133	2.67083	1.13413	0.308563	0.480979	5.46278	6.13578	5.84201	7.37965	6.59683
ENSG00000273820.2	USP27X	389856	0.499808	2.69105	3.64754	0.0811854	0.19486	6.11677	7.58993	8.02594	5.18882	5.04241
ENSG00000168209.5	DDIT4	54541	-0.557583	7.50689	4.57938	0.0543604	0.148405	97.8299	192.337	168.654	258.864	191.308
ENSG00000203709.12	MIR29B2CHG	100128537	0.326851	2.67603	1.21921	0.291895	0.462529	4.84725	8.61847	7.15237	5.68848	5.26988
ENSG00000141905.19	NFIC	4782	-0.850086	2.66073	10.4579	0.0074643	0.0396629	4.77031	4.57524	4.80465	9.99328	7.01387
ENSG00000148824.19	MTG1	92170	-0.901756	2.6267	6.73758	0.0239682	0.0852768	4.6549	6.34859	2.40232	8.22524	8.64413
ENSG00000157404.15	KIT	3815	0.207264	2.70037	0.494617	0.49575	0.654831	5.19349	6.41952	8.84492	6.5725	5.19406
ENSG00000162194.12	LBHD1	79081	-0.487808	2.65013	3.23201	0.0982688	0.222077	5.3089	6.20672	4.42246	6.4572	8.49247
ENSG00000165029.16	ABCA1	19	0.232596	2.68425	0.597432	0.455022	0.619415	8.61734	4.78804	6.87938	6.34189	5.15615
ENSG00000114737.15	CISH	1154	-0.188271	2.66606	0.557724	0.470046	0.633235	5.65513	6.24218	5.89661	7.37965	6.14188
ENSG00000163517.15	HDAC11	79885	-0.552244	2.66201	5.05059	0.0449266	0.130555	5.23196	5.24911	5.29603	8.0715	7.35509
ENSG00000117791.16	2022-03-02	54996	-0.0368785	2.67311	0.0195303	0.891254	0.935852	7.117	5.10724	6.49719	6.64938	6.14188
ENSG00000221821.4	C6orf226	441150	-0.6506	2.66945	5.14563	0.0432706	0.127063	5.96289	3.61763	5.78742	8.6096	7.43092
ENSG00000088930.8	XRN2	22803	-0.192054	7.51641	1.23495	0.288951	0.459979	152.496	180.243	186.726	198.52	197.071
ENSG00000121716.20	PILRB	29990	-0.659841	2.65063	5.75108	0.0342824	0.107988	6.38606	4.1851	4.47706	7.57183	8.30291
ENSG00000160766.14	GBAP1	2630	-0.258664	2.63258	0.674074	0.428187	0.596138	5.61666	7.51899	3.76728	7.68714	5.87649
ENSG00000119725.19	ZNF410	57862	0.120531	2.71004	0.120583	0.734623	0.836806	5.73207	4.53977	9.93688	7.26435	5.04241
ENSG00000189343.7	RPS2P46	125208	-0.613359	2.68288	4.0083	0.0692212	0.175064	4.50102	3.8659	7.42536	7.84088	8.15126
ENSG00000243477.5	NAA80	24142	-0.20871	2.66572	0.690917	0.422634	0.59148	5.3089	5.95845	6.44259	6.87999	6.74848
ENSG00000066382.16	MPPED2	744	1.17315	2.68558	14.3096	0.00276649	0.022106	8.27111	7.66086	8.68112	4.72759	2.54016
ENSG00000105865.11	DUS4L	11062	0.50488	2.64615	2.99704	0.109899	0.239374	6.65536	8.6894	5.62362	4.18949	5.68693
ENSG00000134215.16	VAV3	10451	2.17767	2.7682	18.3613	0.00114314	0.0131033	11.2333	3.51123	15.0145	2.1524	2.19894
ENSG00000174628.16	IQCK	124152	0.0674098	2.65837	0.0535476	0.821033	0.893612	6.77077	6.20672	6.06041	4.4201	7.69631
ENSG00000118160.14	SLC8A2	6543	-0.341317	2.64154	1.57735	0.233851	0.39991	4.77031	6.95152	4.91384	7.22591	6.86222
ENSG00000168214.20	RBPJ	3516	0.451223	7.5422	5.86742	0.032822	0.104984	197.122	183.471	245.747	150.745	154.609
ENSG00000156172.6	C8orf37	157657	-0.387288	2.63467	1.76475	0.209578	0.372076	5.50125	6.52592	4.25866	5.72692	8.53039
ENSG00000227097.5	RPS28P7	646195	-2.07056	2.6375	50.6623	1.46415e-05	0.00114197	2.80833	1.95068	3.33049	10.0317	12.4733
ENSG00000167861.16	HID1	283987	0.461522	2.67069	2.3229	0.154273	0.301634	9.23286	5.00084	6.98858	4.9582	5.3078
ENSG00000171992.13	SYNPO	11346	-1.46922	2.62777	31.06	0.000137349	0.00399985	3.77009	3.7595	3.1121	8.49429	11.2222
ENSG00000160439.16	RDH13	112724	-1.07853	2.63692	15.5646	0.00207256	0.0186645	3.2315	5.10724	4.36786	9.07082	8.83369
ENSG00000260260.1	SNHG19	100507303	-0.878336	2.65226	9.17151	0.0108665	0.0505682	5.50125	3.26296	5.18683	7.72557	9.32656
ENSG00000132437.18	DDC	1644	1.32188	2.643	9.82325	0.0089549	0.0447845	4.34714	12.8745	7.09777	3.84357	2.6539
ENSG00000183780.13	SLC35F3	148641	-1.89934	2.62127	43.6941	2.94992e-05	0.00167464	2.11586	3.68856	2.83911	10.4161	11.1464
ENSG00000273148.1	LINC00653	100270804	0.930972	2.65183	10.5062	0.0073634	0.0393848	8.27111	8.1574	6.55179	3.2286	4.81493
ENSG00000100068.13	LRP5L	91355	-0.46986	2.65668	2.86336	0.11728	0.250046	6.19371	4.00777	6.00581	7.87932	7.05179
ENSG00000185787.15	MORF4L1	10933	0.640928	7.55836	8.67667	0.0126459	0.0558251	206.547	172.015	281.563	141.828	140.315
ENSG00000116031.9	CD207	50489	-0.568354	2.6365	3.69785	0.0793735	0.191846	7.00159	4.11417	4.25866	7.95619	7.27926
ENSG00000257727.6	CNPY2	10330	-0.240587	2.63977	0.826533	0.381779	0.553678	5.07808	6.73872	5.35063	6.14971	7.393
ENSG00000100271.17	TTLL1	25809	0.552439	2.63366	3.51471	0.0862186	0.203415	6.84771	8.6894	5.45983	4.07418	5.49736
ENSG00000102265.12	TIMP1	7076	3.35249	2.68376	102.803	4.123e-07	0.000144346	11.7334	8.44114	9.77309	0.80715	1.13739
ENSG00000131650.14	KREMEN2	79412	-1.10744	2.64928	9.21021	0.0107403	0.0502137	5.50125	2.05708	5.18683	8.95552	9.25073
ENSG00000146776.14	ATXN7L1	222255	-0.11449	2.6424	0.191804	0.669464	0.789431	6.34759	5.95845	5.56902	7.37965	5.53527
ENSG00000187266.14	EPOR	2057	-1.80052	2.62597	48.2111	1.85547e-05	0.00130021	2.92374	2.83736	3.38509	11.7229	9.47821
ENSG00000258692.2	SALL4P7	390483	-0.441867	2.63099	2.96323	0.11171	0.241821	5.57819	5.81658	4.58625	7.68714	6.82431
ENSG00000272168.8	CASC15	401237	0.0543957	2.64986	0.0401017	0.84475	0.909002	6.65536	5.88751	6.3334	7.22591	4.89076
ENSG00000145555.15	MYO10	4651	-1.32143	2.61713	20.5401	0.000748157	0.0104771	2.76986	4.96537	3.54889	9.83954	9.02325
ENSG00000112742.10	TTK	7272	0.731964	7.58057	6.21627	0.0288685	0.0960623	224.512	136.051	322.403	126.915	147.102
ENSG00000177511.6	ST8SIA3	51046	2.86151	2.70531	47.8178	1.92912e-05	0.00134021	8.19417	9.29234	12.2846	1.99866	0.720344
ENSG00000233723.9	LINC01122	400955	0.149784	2.62403	0.199466	0.663376	0.785136	4.30867	9.32781	5.29603	5.80379	5.6111
ENSG00000251141.6	MRPS30-DT	100506674	0.968719	2.61928	8.28206	0.0143161	0.0606272	8.42499	9.29234	4.80465	3.15173	4.54954
ENSG00000079435.10	LIPE	3991	0.124032	2.64952	0.1695	0.688062	0.802333	8.34805	4.5043	6.388	6.18815	5.57319
ENSG00000104714.14	ERICH1	157697	0.0569308	2.64511	0.0516557	0.824163	0.895823	5.80901	6.41952	6.60639	6.0344	6.02814
ENSG00000130202.10	NECTIN2	5819	-0.811624	2.64627	5.72192	0.0346606	0.108893	5.88595	2.66002	5.73282	7.37965	9.25073
ENSG00000132837.15	DMGDH	29958	0.792982	2.65092	8.04138	0.0154635	0.063726	9.19439	6.13578	7.09777	4.3048	4.32206
ENSG00000164414.18	SLC35A1	10559	0.257976	2.62676	0.890846	0.364494	0.537904	7.30935	6.91606	5.29603	4.8429	6.06605
ENSG00000101115.13	SALL4	57167	-1.50285	2.60086	27.3439	0.000236494	0.00552405	2.8468	4.57524	2.83911	9.87797	9.62986
ENSG00000071073.13	MGAT4A	11320	1.06123	2.66454	14.3436	0.00274443	0.0220279	8.77122	6.27765	8.79032	3.99731	3.60172
ENSG00000163597.15	SNHG16	100507246	-0.394438	7.49462	5.7261	0.0346061	0.108778	162.345	167.723	150.254	211.281	209.658
ENSG00000170296.10	GABARAP	11337	-0.804576	2.65426	5.42175	0.0388589	0.118091	4.61643	2.80189	7.04317	8.99395	7.69631
ENSG00000187672.13	ERC2	26059	2.26883	2.67941	60.1868	6.3335e-06	0.000705693	8.30958	8.86674	10.8105	2.11396	1.74399
ENSG00000235748.1	SEPTIN14P12	106480343	-0.143053	2.65217	0.223007	0.645519	0.772306	6.69383	4.04323	7.20697	5.84223	7.31718
ENSG00000270084.2	GAS5-AS1	100506046	0.478532	2.62251	2.78201	0.122075	0.257292	6.96312	7.87366	5.67822	3.99731	5.83858
ENSG00000179476.8	C14orf28	122525	0.351524	2.61031	1.41284	0.258351	0.426159	7.15547	7.80273	4.75005	4.53541	5.80066
ENSG00000226259.10	GTF2H2B	653238	0.263052	2.63884	0.988374	0.340428	0.513274	7.30935	5.81658	6.66099	4.88133	6.10397
ENSG00000160606.11	TLCD1	116238	-0.311381	2.59887	1.13301	0.308792	0.481186	5.38584	6.98699	3.87648	6.87999	6.63475
ENSG00000138061.12	CYP1B1	1545	1.35885	2.64353	26.351	0.000275959	0.00605703	7.96335	8.29927	8.29893	3.42078	2.9572
ENSG00000144802.11	NFKBIZ	64332	1.1021	2.69268	10.2554	0.00790564	0.0412385	7.34782	5.42644	11.8478	4.03575	3.56381
ENSG00000154146.13	NRGN	4900	-0.759626	2.59853	5.94508	0.0318886	0.102942	3.42385	6.49045	4.04027	8.80177	7.01387
ENSG00000204356.14	NELFE	7936	-0.231205	7.48601	1.58005	0.233476	0.399574	177.002	185.705	139.826	186.183	207.156
ENSG00000164300.17	SERINC5	256987	-0.000205078	2.64179	5.07473e-07	0.999444	0.999611	7.15547	4.2915	7.09777	6.14971	6.17979
ENSG00000169598.15	DFFB	1677	-0.704532	2.59825	6.79941	0.0234553	0.0837771	4.77031	5.63925	3.82188	7.14904	8.37874
ENSG00000140848.17	CPNE2	221184	1.61779	2.66558	27.7424	0.000222546	0.00528076	9.92533	6.20672	9.77309	2.65206	2.9572
ENSG00000178935.5	ZNF552	79818	0.302136	2.61984	1.23002	0.289868	0.460633	5.38584	7.90913	6.388	5.30413	5.34571
ENSG00000198324.13	PHETA1	144717	-0.637543	2.59554	5.47725	0.0380385	0.116168	4.92419	5.85205	3.76728	7.6487	7.50674
ENSG00000249069.8	LINC01033	104355136	2.20767	2.66725	53.0821	1.16953e-05	0.000971303	10.31	7.12886	10.1553	1.88335	2.08521
ENSG00000282870.1	FRG1DP	102723316	0.420404	2.65806	2.02711	0.180855	0.336457	6.7323	5.14271	9.06331	5.15038	5.23197
ENSG00000127863.15	TNFRSF19	55504	-0.263955	2.62619	1.00727	0.336036	0.508881	5.42431	5.03631	6.49719	6.07284	7.46883
ENSG00000165259.14	HDX	139324	1.1154	2.61818	17.1646	0.00146341	0.0152628	7.96335	8.54754	6.66099	3.49765	3.63963
ENSG00000010319.7	SEMA3G	56920	-0.450739	2.59903	2.94056	0.112945	0.243992	4.77031	6.17125	4.64085	6.76468	7.46883
ENSG00000168028.14	RPSA	3921	-0.624832	9.68333	9.58581	0.00960131	0.0468802	706.583	546.688	773.657	1093.73	989.904
ENSG00000119402.17	FBXW2	26190	0.0392325	7.51325	0.0479619	0.830455	0.900191	199.968	162.793	191.039	165.235	194.038
ENSG00000102109.9	PCSK1N	27344	-0.132868	2.62287	0.253809	0.623837	0.756201	5.3089	5.78111	6.49719	7.26435	5.57319
ENSG00000236810.6	ELOA-AS1	100506963	0.0105579	2.58639	0.00114235	0.973612	0.986417	6.65536	7.23526	3.82188	5.26569	6.52101
ENSG00000137070.17	IL11RA	3590	0.23299	2.62641	0.691758	0.42236	0.591214	7.69405	5.07177	6.71559	6.0344	5.00449
ENSG00000180044.5	C3orf80	401097	0.518582	2.64935	3.16805	0.101278	0.226593	6.15524	6.10032	9.00871	5.61161	4.24624
ENSG00000181027.11	FKRP	79147	-0.507593	2.59533	3.29889	0.0952399	0.217644	5.50125	5.42644	4.31326	5.80379	8.68204
ENSG00000201428.1	RN7SKP71	106479126	-2.05608	2.59537	20.8685	0.000703711	0.0101397	3.96244	0.993075	2.94831	13.7984	7.99961
ENSG00000204685.7	STARD7-AS1	285033	-0.595291	2.58031	3.81415	0.0753702	0.184985	5.23196	6.17125	3.1667	7.76401	7.01387
ENSG00000207205.1	RNVU1-15	101954267	-0.306788	2.6055	1.23547	0.288853	0.459979	4.46255	6.56139	5.40523	7.57183	5.99023
ENSG00000220804.8	LINC01881	728323	0.96072	2.63316	13.7497	0.00316252	0.0237972	7.65558	7.30619	7.91675	4.11262	3.71546
ENSG00000117984.14	CTSD	1509	-1.22332	2.59574	22.0645	0.00056606	0.00909906	4.34714	3.40483	3.87648	9.91641	8.18917
ENSG00000104852.15	SNRNP70	6625	-0.390609	7.51088	4.85232	0.048634	0.137576	152.996	146.762	186.726	218.123	206.966
ENSG00000207005.1	RNU1-2	26870	-0.623059	2.58084	3.80969	0.075519	0.185165	3.77009	7.02246	3.65808	7.41809	7.50674
ENSG00000234456.8	MAGI2-AS3	100505881	3.87911	2.60512	77.2652	1.80921e-06	0.000334592	8.30958	13.1582	7.26157	0.384357	0.909908
ENSG00000101331.17	CCM2L	140706	-0.833291	2.58114	8.33563	0.0140747	0.0598449	3.8855	5.95845	3.54889	7.91775	8.07543
ENSG00000126249.8	PDCD2L	84306	0.204394	2.62251	0.629334	0.443525	0.609686	6.80924	5.60378	6.87938	5.65005	5.49736
ENSG00000182809.10	CRIP2	1397	-0.55703	2.64316	1.47093	0.249322	0.416559	6.15524	1.95068	7.58916	9.76267	5.49736
ENSG00000205544.4	TMEM256	254863	-1.17666	2.59756	17.2946	0.00142392	0.0149855	4.88572	2.90829	4.09487	8.6096	9.28864
ENSG00000144460.12	NYAP2	57624	-0.473242	2.59224	3.45933	0.0884293	0.206742	5.15502	5.60378	4.64085	7.57183	6.71057
ENSG00000166407.14	LMO1	4004	-0.826443	2.58175	8.46736	0.0135012	0.0583327	3.84703	5.78111	3.82188	8.80177	7.16553
ENSG00000176896.8	TCEANC	170082	0.15082	2.60463	0.350145	0.565386	0.710704	6.88618	6.06485	5.78742	5.68848	5.57319
ENSG00000177548.13	RABEP2	79874	-0.345222	2.602	1.3216	0.273457	0.444008	6.7323	4.0787	5.40523	5.57318	8.15126
ENSG00000029725.17	RABEP1	9135	0.0204642	7.49457	0.0127177	0.912139	0.949728	161.421	211.596	170.783	176.958	180.503
ENSG00000272143.1	FGF14-AS2	283481	0.161631	2.59275	0.337323	0.572491	0.716022	5.3089	7.7318	5.56902	5.95753	5.15615
ENSG00000011478.12	QPCTL	54814	-0.728303	2.58472	6.54864	0.0256202	0.0890008	6.11677	3.90137	3.98567	8.1868	7.31718
ENSG00000090975.12	PITPNM2	57605	0.0941123	2.62963	0.0713114	0.794125	0.876234	7.8864	3.36936	7.64376	5.68848	6.06605
ENSG00000128011.4	LRFN1	57622	-0.508865	2.57491	2.52261	0.139093	0.281022	3.73162	7.16433	4.09487	7.91775	6.36936
ENSG00000152804.11	HHEX	3087	0.367765	2.63486	1.60987	0.229381	0.394947	5.50125	5.99392	8.84492	5.53474	4.92867
ENSG00000275111.5	ZNF2	7549	-0.107999	2.57246	0.127244	0.727712	0.831651	5.42431	7.55446	3.98567	6.14971	6.10397
ENSG00000103599.20	IQCH	64799	0.958535	2.59733	12.4385	0.00438312	0.0286528	8.50193	7.44806	6.2788	3.80513	3.8292
ENSG00000146707.14	POMZP3	22932	0.313567	2.64929	0.834722	0.37951	0.551392	6.15524	4.25603	9.93688	5.22725	5.6111
ENSG00000147799.11	ARHGAP39	80728	-1.40928	2.5717	29.832	0.000163445	0.0044425	3.50079	3.79496	3.2213	10.3008	8.37874
ENSG00000148841.17	ITPRIP	85450	-1.01072	2.57788	14.7565	0.00249191	0.020686	3.61621	4.85897	4.04027	9.07082	7.77213
ENSG00000100297.16	MCM5	4174	-0.712286	7.50771	13.3035	0.00352655	0.0253148	123.028	132.575	179.191	243.605	231.155
ENSG00000160117.16	ANKLE1	126549	-0.174826	2.59775	0.414987	0.531982	0.683073	6.77077	4.64617	5.62362	5.95753	6.86222
ENSG00000229833.10	PET100	100131801	-0.819452	2.59969	8.48901	0.0134096	0.0581035	3.73162	4.25603	5.78742	7.14904	8.98534
ENSG00000273238.3	TMEM271	112441426	-0.0117405	2.5912	0.00210633	0.964175	0.980335	5.50125	6.63232	5.62362	5.9191	6.02814
ENSG00000115423.19	DNAH6	1768	1.31886	2.60448	23.4728	0.000442566	0.00788459	8.88663	7.7318	7.09777	3.34391	2.99511
ENSG00000256436.1	TAS2R31	259290	-0.204212	2.58606	0.639758	0.439872	0.606383	5.3089	6.17125	5.24143	6.07284	6.7864
ENSG00000188997.8	KCTD21	283219	0.213836	2.56615	0.480962	0.501639	0.659007	6.57842	7.76726	4.09487	5.65005	5.00449
ENSG00000268654.2	MIMT1	100073347	0.177526	2.58387	0.359608	0.560256	0.706831	5.27043	7.7318	5.56902	6.53407	4.4358
ENSG00000140543.14	DET1	55070	0.443141	2.57471	2.21935	0.162972	0.313417	7.07853	7.55446	5.02304	5.72692	3.94293
ENSG00000157087.20	ATP2B2	491	-0.689424	2.54976	3.64889	0.0811362	0.19482	3.46232	7.30619	3.0029	7.84088	7.0897
ENSG00000197296.6	FITM2	128486	-0.158888	2.5767	0.352029	0.564357	0.709809	6.03983	5.92298	4.85924	5.41943	7.12761
ENSG00000138182.14	KIF20B	9585	0.781522	7.54495	14.2622	0.00279765	0.0221972	213.087	187.868	271.736	116.499	144.334
ENSG00000235453.10	SMIM27	100129250	-0.26773	2.61595	0.716097	0.414545	0.584127	5.73207	3.61763	7.53456	6.41876	7.05179
ENSG00000240342.3	RPS2P5	100130562	-0.560547	2.59648	4.09215	0.0667554	0.171036	4.07785	4.68164	6.3334	7.84088	6.93805
ENSG00000166340.17	TPP1	1200	-0.304256	2.5836	1.12819	0.309776	0.482056	5.73207	5.07177	5.40523	8.34055	5.00449
ENSG00000167550.11	RHEBL1	121268	-0.0110614	2.63143	0.000891589	0.976687	0.987921	5.88595	3.51123	9.06331	7.34122	4.96658
ENSG00000103876.12	FAH	2175	0.468536	2.61072	2.24367	0.160873	0.310446	8.00182	4.57524	7.86215	5.53474	4.28415
ENSG00000145945.7	FAM50B	26240	-0.720493	2.5489	5.63418	0.0358289	0.111528	4.11632	6.24218	3.2759	7.37965	7.69631
ENSG00000274386.5	TMEM269	100129924	0.668433	2.58112	4.2194	0.0632137	0.164489	9.27133	5.78111	5.73282	3.38234	5.34571
ENSG00000163673.7	DCLK3	85443	0.958241	2.64153	8.23233	0.0145446	0.0613056	7.15547	5.14271	10.8651	3.84357	4.05667
ENSG00000171703.17	TCEA2	6919	-0.561638	2.57358	3.17632	0.100882	0.226045	6.77077	3.26296	4.75005	7.30278	7.24135
ENSG00000197070.14	ARRDC1	92714	-1.48732	2.54011	22.2705	0.00054568	0.00893892	4.46255	3.33389	2.07473	8.95552	9.66777
ENSG00000117906.14	RCN2	5955	0.435475	7.52129	6.19482	0.0290946	0.0964925	204.162	187.053	223.853	143.788	159.386
ENSG00000166762.18	CATSPER2	117155	0.212839	2.54981	0.487153	0.498953	0.657157	6.11677	7.90913	4.20407	5.41943	5.11823
ENSG00000162066.15	AMDHD2	51005	-1.49513	2.53115	21.6207	0.00061309	0.00947306	3.46232	4.32697	1.96554	8.57116	9.97108
ENSG00000250802.7	ZBED3-AS1	728723	0.175503	2.53751	0.245814	0.629299	0.759741	5.23196	8.97314	3.65808	5.4963	5.11823
ENSG00000255737.2	AGAP2-AS1	100130776	-1.16973	2.54837	20.4909	0.000755096	0.0105087	4.00091	4.1851	3.2759	9.03239	8.22708
ENSG00000118898.16	PPL	5493	1.11998	2.60387	12.8103	0.00398781	0.027142	9.54063	5.28458	8.24434	3.38234	3.67754
ENSG00000180447.7	GAS1	2619	-1.23735	2.56816	19.6282	0.00088999	0.0115038	3.38538	3.15656	4.85924	8.30211	9.51612
ENSG00000100003.18	SEC14L2	23541	-0.738312	2.55994	7.00887	0.0218126	0.0800151	3.8855	5.10724	4.75005	9.07082	6.2177
ENSG00000165757.9	JCAD	57608	-0.748952	2.54347	7.42859	0.0189148	0.0729547	4.80878	5.21364	3.43969	8.03306	7.12761
ENSG00000167333.13	TRIM68	55128	1.93398	2.57994	47.0372	2.08568e-05	0.00140677	8.23264	9.39874	7.53456	2.11396	2.27477
ENSG00000255121.2	CCDC84-DT	107984396	0.0344314	2.54053	0.0123406	0.913445	0.950481	6.11677	7.37713	3.76728	5.72692	5.57319
ENSG00000149231.14	CCDC82	79780	0.485515	7.5314	6.34737	0.0275316	0.0931033	179.541	197.657	249.296	141.559	156.694
ENSG00000285077.2	ARHGAP11B	89839	0.51732	2.61269	2.61092	0.132984	0.273483	7.23241	4.5043	9.00871	4.45854	5.15615
ENSG00000128482.16	RNF112	7732	-0.502841	2.54499	2.88665	0.115951	0.248126	6.19371	4.85897	3.65808	5.95753	7.99961
ENSG00000185838.14	GNB1L	54584	-1.42871	2.53689	14.7955	0.00246948	0.0206191	5.53972	2.30535	2.29313	8.6096	9.70569
ENSG00000234851.4	RPL23AP42	647099	-0.510744	2.56475	4.1076	0.0663127	0.170208	5.23196	4.53977	5.18683	7.03373	7.16553
ENSG00000204091.8	TDRG1	732253	-1.79351	2.53482	45.0108	2.56703e-05	0.00154302	2.65445	3.33389	2.56612	10.8773	8.98534
ENSG00000226200.7	SGMS1-AS1	104355295	0.273111	2.53999	0.773347	0.397037	0.568182	7.15547	7.23526	3.98567	4.8429	5.34571
ENSG00000273136.7	NBPF26	101060684	0.375812	2.56046	1.79622	0.205832	0.368138	5.73207	7.6254	5.84201	4.22793	5.64901
ENSG00000089820.15	ARHGAP4	393	-0.613433	2.53689	4.77446	0.0501902	0.140418	5.0396	5.53285	3.49429	6.72625	7.69631
ENSG00000121210.16	TMEM131L	23240	0.535666	2.5877	3.67786	0.0800872	0.193155	7.30935	5.49738	7.58916	5.22725	4.1325
ENSG00000204301.6	NOTCH4	4855	0.636308	2.5619	5.11958	0.0437171	0.128018	6.11677	8.08647	6.1696	4.9582	3.79128
ENSG00000159335.16	PTMS	5763	-0.173028	7.48577	0.680988	0.425893	0.594468	138.762	210.993	161.611	214.394	170.001
ENSG00000281207.1	SLFNL1-AS1	100507178	-0.548134	2.55854	4.46346	0.0570372	0.153472	5.34737	4.43337	4.91384	7.87932	6.44518
ENSG00000114019.14	AMOTL2	51421	-0.984008	2.55536	14.5822	0.00259499	0.0213148	3.8855	3.8659	4.75005	7.76401	8.68204
ENSG00000243660.10	ZNF487	642819	0.324695	2.54533	1.29976	0.277251	0.448033	6.03983	7.76726	4.91384	4.72759	5.26988
ENSG00000168135.4	KCNJ4	3761	-0.933923	2.55039	12.7986	0.00399964	0.0271914	4.77031	3.5467	4.36786	7.95619	8.18917
ENSG00000185022.12	MAFF	23764	-0.372143	2.6166	0.716405	0.414447	0.584065	3.30844	3.33389	9.82769	8.30211	5.72484
ENSG00000197763.17	TXNRD3	114112	0.720534	2.53788	4.95841	0.0466064	0.133707	5.88595	9.50514	4.91384	4.26636	3.98085
ENSG00000198715.13	GLMP	112770	-0.553728	2.53583	4.09069	0.0667974	0.171109	4.88572	5.71018	3.76728	6.68781	7.43092
ENSG00000234911.2	TEX21P	441687	-0.565926	2.55554	3.76287	0.0771042	0.187854	6.15524	3.61763	4.80465	6.4572	7.92378
ENSG00000087884.14	AAMDC	28971	-0.267862	2.55239	1.07362	0.321248	0.494036	5.73207	5.21364	5.07764	7.1106	5.76275
ENSG00000101204.17	CHRNA4	1137	-0.512468	2.56817	3.48916	0.0872299	0.204765	4.80878	4.11417	6.115	7.72557	6.52101
ENSG00000137414.6	FAM8A1	51439	0.91406	7.56461	8.84146	0.0120174	0.0538682	259.52	129.525	310.118	108.735	138.533
ENSG00000259431.6	THTPA	79178	-0.559726	2.53584	3.83447	0.0746964	0.183904	5.73207	4.89444	3.71268	6.0344	8.11335
ENSG00000006062.17	MAP3K14	9020	0.296906	2.53484	0.935535	0.353164	0.527165	7.34782	6.88059	4.20407	5.61161	4.4358
ENSG00000205913.7	SRRM2-AS1	100128788	0.0392997	2.54732	0.022061	0.884476	0.932014	6.69383	5.78111	4.96844	5.84223	5.49736
ENSG00000243667.7	WDR92	116143	0.313944	2.51227	0.644861	0.438102	0.604826	6.69383	8.54754	2.89371	4.3048	5.49736
ENSG00000019549.13	SNAI2	6591	-2.76169	2.50425	28.776	0.00019064	0.0048509	0.538584	3.29843	1.09197	11.8382	10.9568
ENSG00000132881.12	CPLANE2	79363	-0.736297	2.51369	4.89776	0.0477527	0.136017	4.80878	5.81658	2.56612	8.14837	6.63475
ENSG00000151176.8	PLBD2	196463	-0.88303	2.53978	10.9869	0.00644218	0.0362781	4.80878	3.8659	4.14947	8.95552	6.82431
ENSG00000164627.18	KIF6	221458	0.137186	2.53711	0.179758	0.679338	0.796305	4.15479	8.3702	5.24143	5.03508	5.76275
ENSG00000124216.4	SNAI1	6615	-0.434228	2.56488	1.8281	0.202127	0.363797	5.96289	3.12109	6.3334	7.26435	6.55892
ENSG00000137198.10	GMPR	2766	-0.135084	2.53766	0.247197	0.628346	0.759215	6.53995	5.24911	4.69545	5.4963	6.59683
ENSG00000124785.9	NRN1	51299	-0.414768	7.51926	2.59154	0.134295	0.275046	117.757	148.287	219.54	255.982	175.385
ENSG00000201772.1	SNORA5C	677796	-1.6567	2.53063	16.9736	0.00152381	0.0156204	4.61643	1.38321	3.1667	8.14837	11.0705
ENSG00000213866.3	YBX1P10	158373	0.675218	2.56851	4.05723	0.0677691	0.172711	4.30867	8.33473	8.08054	4.9582	3.67754
ENSG00000211450.10	SELENOH	280636	-0.254013	2.54555	0.950344	0.349525	0.523347	4.61643	5.74565	5.67822	5.99597	6.74848
ENSG00000219545.11	UMAD1	729852	0.646654	2.55334	5.55162	0.0369716	0.113899	7.00159	6.77419	6.55179	3.57452	5.08032
ENSG00000114473.14	IQCG	84223	-0.105238	2.50692	0.0875998	0.772483	0.862111	4.61643	8.22833	3.33049	6.14971	5.53527
ENSG00000204248.11	COL11A2	1302	0.862892	2.58063	6.58404	0.0253005	0.0881978	9.07898	4.3979	8.24434	3.7667	4.17041
ENSG00000231925.11	TAPBP	6892	0.367364	2.59238	0.630835	0.442996	0.609192	8.65581	2.34082	8.79032	5.84223	4.32206
ENSG00000251381.8	LINC00958	100506305	0.909287	2.52695	9.25884	0.0105841	0.0498018	7.23241	8.54754	5.13224	3.92044	3.52589
ENSG00000139973.16	SYT16	83851	1.50573	2.59422	24.9926	0.000343207	0.00684088	7.65558	6.41952	10.2645	2.95955	2.72972
ENSG00000185507.21	IRF7	3665	-0.0390493	2.57101	0.0121388	0.914153	0.950711	6.61689	3.40483	7.47996	7.26435	4.66328
ENSG00000102144.15	PGK1	5230	-0.63632	9.64303	5.23447	0.0417884	0.124064	425.635	931.859	605.495	1092.92	941.3
ENSG00000123975.5	CKS2	1164	0.219455	7.53874	0.632112	0.442547	0.608714	222.512	115.622	253.008	163.774	174.589
ENSG00000182568.17	SATB1	6304	0.482207	2.56425	2.20223	0.16447	0.31564	7.8864	4.57524	7.37076	5.76535	3.67754
ENSG00000228544.1	CCDC183-AS1	100131193	-0.789332	2.51741	8.20633	0.0146659	0.061585	3.65468	5.46191	3.93107	7.72557	7.35509
ENSG00000237296.9	SMG1P1	641298	-1.31355	2.51776	15.0511	0.00232836	0.0199682	4.84725	2.66002	3.0575	11.1848	6.36936
ENSG00000126091.20	ST3GAL3	6487	-0.284582	2.53941	1.04403	0.327726	0.500454	5.80901	4.5043	5.51442	7.57183	5.26988
ENSG00000179348.12	GATA2	2624	0.616905	2.5668	2.67275	0.128905	0.267457	4.50102	7.41259	8.57193	6.07284	2.80555
ENSG00000100036.13	SLC35E4	339665	-0.161283	2.57202	0.202967	0.660642	0.782868	5.38584	3.47576	8.08054	7.6487	4.89076
ENSG00000107968.10	MAP3K8	1326	-0.226061	2.56567	0.450964	0.51503	0.66955	5.23196	3.5467	7.75295	7.37965	5.42154
ENSG00000130035.8	GALNT8	26290	0.380031	2.50438	1.4085	0.259044	0.427035	6.11677	8.22833	4.04027	4.80446	4.66328
ENSG00000231890.8	DARS-AS1	101928243	0.0629355	2.5037	0.0196169	0.891015	0.935762	2.53904	9.89528	4.53166	5.61161	5.26988
ENSG00000113205.5	PCDHB3	56132	0.316783	2.53967	1.49807	0.245249	0.412374	6.0783	6.02938	6.60639	5.381	4.62537
ENSG00000150093.19	ITGB1	3688	0.238534	7.5157	1.71247	0.216001	0.378846	169.5	190.848	224.126	169.77	160.447
ENSG00000167778.9	SPRYD3	84926	-0.646074	2.50331	5.25873	0.0413943	0.123312	5.53972	4.6107	3.43969	7.57183	6.67266
ENSG00000204054.14	LINC00963	100506190	-0.301064	2.50979	1.1566	0.304034	0.475804	5.07808	5.95845	4.31326	7.34122	5.3078
ENSG00000243406.6	MRPS31P5	100887750	-0.0504394	2.54486	0.0331695	0.858629	0.916752	5.88595	4.43337	6.77018	6.0344	5.72484
ENSG00000148444.16	COMMD3	23412	-0.447086	2.50981	2.84734	0.118205	0.251511	5.27043	5.07177	4.31326	5.88066	7.46883
ENSG00000106069.22	CHN2	1124	-0.501839	2.53179	3.03815	0.107746	0.236146	4.2702	4.43337	6.00581	8.1868	5.64901
ENSG00000155542.12	SETD9	133383	-0.0851124	2.53001	0.108895	0.747289	0.845496	5.07808	5.46191	6.1696	6.11128	5.68693
ENSG00000162551.14	ALPL	249	0.684305	2.50501	5.38506	0.039413	0.119255	6.27065	8.3702	5.07764	3.99731	4.20832
ENSG00000172828.13	CES3	23491	-0.148232	2.48593	0.188631	0.672027	0.791303	6.65536	6.13578	2.94831	5.381	6.33144
ENSG00000181409.14	AATK	9625	-0.544935	2.50825	4.07074	0.0673748	0.172211	4.07785	5.46191	4.64085	6.11128	7.69631
ENSG00000089639.11	GMIP	51291	-0.0499469	2.51386	0.0349044	0.855024	0.914571	6.53995	5.07177	5.02304	6.07284	5.42154
ENSG00000103769.10	RAB11A	8766	0.123445	7.51222	0.454173	0.513566	0.668131	189.505	164.247	212.333	159.931	186.455
ENSG00000148450.13	MSRB2	22921	-0.30404	2.49384	1.10765	0.314025	0.486596	5.92442	5.60378	3.60348	5.99597	6.52101
ENSG00000257704.4	INAFM1	255783	-0.522376	2.52477	3.66027	0.0807222	0.194242	4.96266	3.93683	5.62362	7.61027	6.25562
ENSG00000170835.15	CEL	1056	0.334889	2.49261	1.18788	0.297883	0.469159	6.34759	7.55446	4.14947	5.18882	4.39789
ENSG00000197353.4	LYPD2	137797	-0.362611	2.47188	0.855647	0.373804	0.546293	3.80856	8.01553	2.72991	5.95753	6.63475
ENSG00000049130.16	KITLG	4254	2.87452	2.56588	73.6	2.31609e-06	0.000391966	10.1562	6.84512	9.99148	1.03776	1.40277
ENSG00000089060.11	SLC8B1	80024	-0.48951	2.50846	3.60231	0.0828575	0.197841	5.23196	4.43337	4.80465	6.26502	7.27926
ENSG00000135740.17	SLC9A5	6553	-0.413182	2.507	2.366	0.150826	0.297032	5.84748	4.32697	4.64085	6.07284	7.0897
ENSG00000157152.17	SYN2	6854	-0.316571	2.49219	1.25798	0.284716	0.455621	4.57796	6.34859	4.14947	6.72625	5.83858
ENSG00000163354.15	DCST2	127579	-0.202718	2.50541	0.622774	0.44585	0.611896	5.53972	5.35551	4.91384	6.49563	5.64901
ENSG00000206634.1	SNORA22	677807	0.0269483	2.53773	0.00874417	0.927094	0.958346	4.96266	4.85897	7.58916	5.65005	5.68693
ENSG00000058272.19	PPP1R12A	4659	0.60981	7.52547	10.2041	0.00802242	0.0416057	188.812	201.027	251.152	129.682	150.286
ENSG00000251664.5	PCDHA12	56137	-0.684748	2.49918	7.01958	0.0217323	0.0798746	3.92397	4.96537	4.53166	7.14904	7.24135
ENSG00000142920.17	AZIN2	113451	-0.703311	2.50997	6.47218	0.0263271	0.0905795	4.53949	3.6531	5.29603	8.14837	6.44518
ENSG00000159214.13	CCDC24	149473	-0.270024	2.49581	1.01139	0.335089	0.508059	5.46278	5.32004	4.58625	7.07217	5.3078
ENSG00000234745.11	HLA-B	3106	2.16839	2.61284	18.245	0.00117036	0.0132294	9.5791	3.47576	13.6496	1.49899	2.42642
ENSG00000271614.1	ATP2B1-AS1	338758	0.611625	2.49917	4.87691	0.0481547	0.136685	6.7323	7.23526	5.40523	3.80513	4.66328
ENSG00000132004.13	FBXW9	84261	-1.44181	2.49113	24.4192	0.00037726	0.00725143	3.73162	2.30535	3.82188	8.37898	9.40238
ENSG00000165061.15	ZMAT4	79698	-0.0258815	2.5318	0.00687462	0.935334	0.963422	5.46278	4.14963	7.47996	6.72625	4.81493
ENSG00000182310.14	SPACA6	147650	-0.0446055	2.50356	0.0261323	0.874359	0.925987	5.23196	5.71018	5.62362	6.80312	4.58745
ENSG00000214279.13	SCART1	619207	0.890396	2.55788	7.08229	0.0212695	0.0788083	7.27088	4.57524	9.71849	3.95888	3.75337
ENSG00000223508.5	RPL23AP53	644128	0.00287693	2.49271	0.000101602	0.992129	0.99557	6.84771	5.17818	4.58625	6.22658	4.85284
ENSG00000175166.17	PSMD2	5708	-0.378516	7.48296	5.33467	0.0401893	0.120905	162.806	163.077	153.039	213.549	201.545
ENSG00000224051.7	CPTP	80772	-0.878422	2.48826	10.1162	0.00822697	0.0422997	5.15502	3.40483	3.82188	7.72557	7.46883
ENSG00000181817.6	LSM10	84967	-0.47157	2.50152	3.21221	0.0991885	0.223423	5.19349	4.0787	5.24143	6.41876	6.97596
ENSG00000037897.17	METTL1	4234	-0.139572	2.47651	0.244947	0.629897	0.760157	5.50125	6.24218	3.98567	5.53474	6.06605
ENSG00000168477.19	TNXB	7148	0.49861	2.5114	2.24885	0.160431	0.30976	4.73184	7.27073	7.15237	5.84223	3.18468
ENSG00000176933.5	TOB2P1	222699	0.177279	2.50501	0.392637	0.543052	0.69225	7.15547	4.57524	5.89661	5.34256	5.04241
ENSG00000184428.13	TOP1MT	116447	0.154377	2.51614	0.319364	0.582756	0.724868	6.03983	4.78804	6.87938	5.45787	5.11823
ENSG00000228696.9	ARL17B	100506084	0.341584	2.49888	1.57789	0.233776	0.399858	6.69383	5.78111	5.78742	4.11262	5.49736
ENSG00000151611.16	MMAA	166785	0.156359	2.46282	0.223903	0.644862	0.771848	5.3089	7.90913	3.65808	5.26569	4.89076
ENSG00000174206.12	C12orf66	144577	0.422818	2.48973	2.4181	0.146788	0.291475	7.19394	6.02938	5.24143	4.45854	4.7391
ENSG00000236256.9	DIAPH2-AS1	10824	1.58349	2.61224	4.6089	0.0537033	0.147104	10.3485	0.957608	13.8134	2.57519	2.9572
ENSG00000139746.15	RBM26	64062	0.450924	7.50372	7.06858	0.0213697	0.0790209	190.082	210.638	209.002	142.981	154.381
ENSG00000249459.10	ZNF286B	729288	0.357672	2.48367	1.67052	0.221343	0.385427	6.53995	6.63232	4.91384	5.15038	4.28415
ENSG00000120322.4	PCDHB8	56128	-0.4593	2.48513	3.02469	0.108445	0.237302	4.69337	4.92991	4.75005	7.5334	5.64901
ENSG00000167664.8	TMIGD2	126259	-0.882378	2.48626	10.8489	0.00669192	0.0370406	3.34691	4.2915	4.75005	7.57183	7.62048
ENSG00000213398.8	LCAT	3931	0.339947	2.51399	1.02513	0.33196	0.505134	8.04029	3.7595	6.71559	4.4201	5.3078
ENSG00000180914.10	OXTR	5021	-0.481434	2.46451	1.83508	0.201327	0.362648	2.88527	7.12886	3.98567	6.22658	6.86222
ENSG00000255198.4	SNHG9	735301	-0.0803579	2.51634	0.0550724	0.818552	0.892245	6.23218	3.26296	7.15237	4.99664	6.67266
ENSG00000127589.4	TUBBP1	92755	-1.38618	2.48336	20.9162	0.000697515	0.0101072	3.26997	2.34082	4.47706	8.41742	9.02325
ENSG00000134245.18	WNT2B	7482	0.868635	2.50244	8.34007	0.0140549	0.059821	8.69428	5.21364	6.60639	3.95888	3.52589
ENSG00000249915.8	PDCD6	10016	-0.486721	2.46929	3.31034	0.0947329	0.21715	4.61643	5.28458	4.14947	5.84223	7.31718
ENSG00000256188.3	TAS2R30	259293	0.478405	2.5023	3.04747	0.107266	0.235496	6.96312	5.32004	6.66099	4.9582	4.09459
ENSG00000137710.16	RDX	5962	0.51507	7.51165	6.62752	0.0249144	0.0874467	162.575	226.776	232.643	152.321	137.813
ENSG00000012171.20	SEMA3B	7869	-0.0754516	2.46117	0.0684687	0.798168	0.87886	5.92442	6.10032	3.82188	5.53474	5.64901
ENSG00000103496.15	STX4	6810	0.283727	2.51232	0.764883	0.399551	0.570665	7.23241	3.83043	7.20697	5.45787	4.51163
ENSG00000106404.13	CLDN15	24146	-0.27334	2.46659	0.708167	0.417065	0.586191	7.27088	4.0787	3.65808	6.07284	6.06605
ENSG00000103966.11	EHD4	30844	0.446662	2.47071	2.59783	0.133868	0.274514	6.27065	7.05792	4.96844	4.72759	4.24624
ENSG00000116885.18	OSCP1	127700	-0.576435	2.47009	5.18196	0.0426568	0.125809	4.69337	4.64617	4.31326	6.87999	6.71057
ENSG00000118939.17	UCHL3	7347	0.181917	2.49068	0.468021	0.507337	0.662986	5.84748	5.46191	6.1696	4.49698	5.76275
ENSG00000198517.10	MAFK	7975	-0.672217	2.48218	6.20117	0.0290275	0.0964119	4.84725	3.5467	4.96844	7.1106	7.05179
ENSG00000213015.9	ZNF580	51157	-0.0348701	2.47937	0.0182414	0.894879	0.938018	5.80901	5.32004	5.18683	5.9191	5.23197
ENSG00000196976.7	LAGE3	8270	-1.0483	2.45212	12.9893	0.00381265	0.026438	4.69337	3.7595	2.78451	8.57116	7.01387
ENSG00000213888.3	LINC01521	54944	-0.423269	2.43916	1.39069	0.261913	0.430734	4.53949	6.73872	2.67531	5.30413	7.27926
ENSG00000139116.18	KIF21A	55605	0.272702	7.49859	2.32409	0.154175	0.301489	167.038	212.624	202.778	157.471	163.935
ENSG00000253910.2	PCDHGB2	56103	-0.373492	2.46581	1.96672	0.186989	0.34404	4.42408	5.71018	4.42246	6.5725	6.02814
ENSG00000100314.4	CABP7	164633	-0.280475	2.47708	0.56642	0.466685	0.630342	2.73139	6.70325	5.73282	7.49496	4.77702
ENSG00000115935.17	WIPF1	7456	0.910337	2.50294	6.81761	0.0233069	0.0834403	9.46369	4.25603	6.98858	3.99731	3.33633
ENSG00000179603.18	GRM8	2918	-1.12702	2.44735	15.338	0.00218112	0.0192141	3.2315	4.71711	2.89371	8.26367	7.62048
ENSG00000187068.3	C3orf70	285382	-0.437414	2.49857	2.13229	0.170775	0.32346	4.2702	3.79496	6.66099	6.84155	6.36936
ENSG00000204923.4	FBXO48	554251	0.492391	2.46987	3.29722	0.0953141	0.217758	6.61689	6.73872	5.13224	4.4201	4.35998
ENSG00000090674.16	MCOLN1	57192	-1.11807	2.4401	13.9325	0.00302628	0.0231365	4.00091	4.3979	2.40232	7.72557	8.03752
ENSG00000172382.10	PRSS27	83886	-0.731276	2.45765	7.52441	0.0183189	0.07152	4.69337	4.32697	3.76728	6.26502	7.92378
ENSG00000221994.11	ZNF630	57232	0.216029	2.47704	0.656344	0.434161	0.601561	6.11677	5.74565	5.56902	5.65005	4.35998
ENSG00000178752.16	ERFE	151176	-1.52378	2.4452	32.962	0.00010596	0.00346233	2.8468	3.5467	2.72991	9.18613	8.37874
ENSG00000206503.13	HLA-A	3105	-0.687808	7.4783	17.5043	0.00136283	0.0145609	134.646	148.5	146.542	236.649	224.785
ENSG00000167733.13	HSD11B1L	374875	-0.932333	2.45705	12.2092	0.00464983	0.0295268	3.30844	4.46884	4.09487	7.1106	7.99961
ENSG00000262333.1	HNRNPA1P16	440396	0.501169	2.45639	2.57834	0.135198	0.276216	5.07808	8.22833	5.02304	3.80513	4.85284
ENSG00000227398.4	KIF9-AS1	285352	-0.0537621	2.48193	0.0297601	0.866009	0.921228	6.88618	3.58216	5.84201	5.80379	5.45945
ENSG00000175701.10	MTLN	205251	-1.03375	2.45145	14.9907	0.00236083	0.0200906	4.11632	3.47576	3.76728	8.80177	6.71057
ENSG00000197935.6	ZNF311	282890	-0.313747	2.43613	1.01927	0.333289	0.506517	4.30867	6.66779	3.49429	5.95753	6.10397
ENSG00000273340.1	MICE	4280	-0.3591	2.46966	1.64396	0.224817	0.389059	4.50102	4.71711	5.51442	7.49496	5.08032
ENSG00000134285.11	FKBP11	51303	0.379084	2.46126	2.00555	0.183014	0.339443	6.84771	5.78111	5.29603	4.61228	4.58745
ENSG00000161914.10	ZNF653	115950	-0.931585	2.43659	11.4536	0.00567519	0.0336108	3.73162	4.75257	3.1667	7.68714	7.20344
ENSG00000167281.19	RBFOX3	146713	-0.264011	2.44554	0.467169	0.507717	0.66336	2.61598	7.58993	4.64085	6.72625	5.19406
ENSG00000163463.11	KRTCAP2	200185	0.0877212	2.46119	0.1154	0.74015	0.840777	5.96289	5.35551	5.35063	5.381	5.08032
ENSG00000142945.13	KIF2C	11004	-0.327996	7.51569	1.74595	0.211859	0.374182	175.848	107.642	214.571	203.863	212.767
ENSG00000164362.21	TERT	7015	-3.35987	2.39978	45.0781	2.54908e-05	0.00154302	0.692465	2.12802	0.32759	11.7613	10.8052
ENSG00000197258.5	EIF4BP6	645579	-0.275106	2.46541	1.00077	0.337538	0.510654	4.80878	4.3979	5.89661	6.84155	5.3078
ENSG00000131477.11	RAMP2	10266	0.288631	2.43279	0.953072	0.34886	0.522737	6.30912	6.66779	4.14947	4.3048	5.08032
ENSG00000247373.3	TMED2-DT	101927415	0.416583	2.44383	2.27046	0.158602	0.307186	6.77077	6.20672	4.85924	4.22793	4.70119
ENSG00000165275.10	TRMT10B	158234	0.393194	2.46383	2.24526	0.160737	0.310283	6.15524	5.53285	6.388	4.80446	4.35998
ENSG00000232445.2	EMSLR	101927746	-0.645148	2.43279	5.8672	0.0328247	0.104984	3.92397	5.10724	3.93107	6.72625	6.82431
ENSG00000258667.2	HIF1A-AS3	105370526	1.70451	2.38745	5.02429	0.0453983	0.13144	1.76963	15.9601	3.43969	3.07486	1.28904
ENSG00000104361.10	NIPAL2	79815	-0.634246	2.42625	4.94872	0.0467873	0.134033	3.65468	5.56831	3.71268	6.80312	6.63475
ENSG00000128655.18	PDE11A	50940	0.376799	2.44869	1.90008	0.194075	0.35331	5.42431	6.66779	5.67822	5.11195	4.01876
ENSG00000173137.12	ADCK5	203054	-1.27154	2.42212	21.2713	0.000653364	0.00974383	4.07785	3.22749	2.72991	8.49429	7.73422
ENSG00000123416.15	TUBA1B	10376	-0.989722	11.2101	24.1974	0.000391492	0.00736934	1605.71	1525.47	1965.86	3253.54	3494.16
ENSG00000147140.16	NONO	4841	-0.0610552	9.68101	0.0892103	0.770467	0.860557	693.35	745.374	981.895	859.384	824.035
ENSG00000196418.12	ZNF124	7678	-0.615861	7.47632	12.2661	0.00458196	0.0293489	132.761	159.566	147.852	245.104	204.616
ENSG00000241852.10	C8orf58	541565	-0.456705	2.40312	1.04519	0.327468	0.500251	2.69292	8.12193	2.62072	7.14904	5.26988
ENSG00000120500.18	ARR3	407	-0.573003	2.42698	3.65002	0.0810947	0.194798	3.30844	5.88751	4.04027	6.34189	6.82431
ENSG00000169218.14	RSPO1	284654	-0.32536	2.41155	0.708394	0.416993	0.586191	3.00068	7.76726	3.38509	5.53474	6.36936
ENSG00000120324.9	PCDHB10	56126	0.67781	2.44708	5.64222	0.0357199	0.111304	6.42453	6.70325	5.84201	4.72759	3.18468
ENSG00000196972.9	SMIM10L2B	399668	-0.726767	2.4365	6.43082	0.0267192	0.0914724	5.15502	3.29843	4.20407	6.18815	7.77213
ENSG00000213965.3	NUDT19	390916	0.496152	2.4511	3.13907	0.102678	0.228727	6.65536	5.71018	5.95121	3.57452	5.08032
ENSG00000235374.2	SSR4P1	728039	-0.725941	2.40629	4.51862	0.055744	0.151102	3.53926	6.06485	2.67531	6.14971	7.50674
ENSG00000085185.15	BCORL1	63035	-0.120821	2.46827	0.143143	0.71201	0.820257	4.73184	4.1851	6.98858	7.03373	4.4358
ENSG00000116815.16	CD58	965	-0.476445	2.4289	3.37663	0.0918623	0.212635	4.84725	4.71711	4.14947	6.0344	6.71057
ENSG00000212124.2	TAS2R19	259294	-0.222273	2.43827	0.720381	0.413193	0.582909	5.23196	4.85897	4.91384	5.22725	6.44518
ENSG00000135164.18	DMTF1	9988	0.197196	7.50195	1.34725	0.269091	0.43929	178.656	185.882	208.347	166.849	166.248
ENSG00000141519.15	CCDC40	55036	0.0662532	2.42771	0.0606441	0.809785	0.886479	5.38584	6.17125	4.58625	5.07351	5.23197
ENSG00000184319.16	RPL23AP82	284942	-0.166734	2.41381	0.303546	0.592122	0.732252	5.84748	5.67471	3.38509	5.22725	5.99023
ENSG00000120049.19	KCNIP2	30819	0.283303	2.45674	1.09275	0.317159	0.490053	5.80901	5.07177	6.66099	5.15038	4.4358
ENSG00000166925.9	TSC22D4	81628	-0.342734	2.44286	1.3049	0.276352	0.447305	5.88595	3.51123	5.13224	6.95686	5.3078
ENSG00000180828.3	BHLHE22	27319	0.0956722	2.43947	0.12533	0.729675	0.83294	4.57796	6.20672	5.67822	5.18882	5.08032
ENSG00000187416.12	LHFPL3	375612	-0.106839	2.4028	0.0762975	0.787239	0.871638	3.57773	8.01553	3.43969	4.34323	6.52101
ENSG00000197363.9	ZNF517	340385	-1.07336	2.41652	13.9866	0.00298731	0.0229308	4.73184	3.08563	3.0575	7.6487	7.65839
ENSG00000197959.14	DNM3	26052	1.29147	2.45729	19.828	0.000856383	0.0112562	8.07876	6.17125	7.09777	3.30547	2.50225
ENSG00000256073.3	URB1-AS1	84996	0.0418955	2.43813	0.0264902	0.87351	0.92557	5.27043	5.42644	5.51442	5.03508	5.45945
ENSG00000144134.18	RABL2A	11159	-0.0323686	2.40223	0.00976902	0.922954	0.955732	4.80878	7.16433	3.38509	5.4963	5.04241
ENSG00000180660.8	MAB21L1	4081	0.200091	7.50143	1.11289	0.312932	0.48553	154.766	204.041	214.298	168.656	163.897
ENSG00000162407.9	PLPP3	8613	-0.740491	2.39964	5.2434	0.0416427	0.123721	3.46232	5.81658	2.89371	6.30345	7.35509
ENSG00000171004.18	HS6ST2	90161	2.42207	2.4618	29.025	0.000183777	0.00472994	11.8873	5.10724	7.26157	0.922457	2.08521
ENSG00000248740.6	LINC02428	101929448	0.459775	2.44663	2.92711	0.113686	0.245108	6.69383	5.21364	6.2242	4.38167	4.39789
ENSG00000115266.11	APC2	10297	0.0680022	2.41474	0.0530407	0.821866	0.894027	5.11655	6.45499	4.42246	6.0344	4.17041
ENSG00000176473.13	WDR25	79446	-0.414732	2.41322	2.29436	0.156609	0.304643	5.50125	4.5043	3.82188	5.88066	6.44518
ENSG00000177103.15	DSCAML1	57453	-1.62408	2.41446	25.3219	0.000325286	0.00657869	3.50079	1.91522	3.1667	10.5314	7.05179
ENSG00000151876.13	FBXO4	26272	-0.357374	2.39379	1.18226	0.298975	0.470342	4.69337	6.13578	3.0029	4.99664	6.90014
ENSG00000155957.17	TMBIM4	51643	0.445708	2.43127	2.84276	0.118472	0.251898	6.42453	5.74565	5.67822	4.11262	4.62537
ENSG00000160190.14	SLC37A1	54020	-0.326682	2.42902	1.41966	0.257269	0.425058	5.38584	4.04323	5.02304	6.72625	5.34571
ENSG00000182218.9	HHIPL1	84439	-1.49561	2.38302	14.909	0.00240562	0.0203482	4.34714	3.05016	1.36496	7.18748	9.51612
ENSG00000102038.15	SMARCA1	6594	0.333642	7.48062	3.21324	0.0991401	0.22337	170.923	229.826	183.013	156.895	151.955
ENSG00000257612.2	MIR4307HG	101927081	1.024	2.45467	12.4713	0.00434642	0.0285397	7.04006	5.92298	7.47996	3.92044	2.76764
ENSG00000172197.11	MBOAT1	154141	0.00130217	2.4189	2.29394e-05	0.99626	0.998063	5.00113	5.81658	4.96844	4.53541	5.99023
ENSG00000166002.7	SMCO4	56935	-1.33295	2.40546	25.3532	0.000323638	0.00656757	2.80833	3.40483	3.49429	7.61027	8.68204
ENSG00000105854.13	PON2	5445	-0.5226	2.38306	2.02899	0.180668	0.336343	4.57796	5.78111	2.62072	4.4201	8.11335
ENSG00000229980.5	TOB1-AS1	400604	0.0867556	2.41331	0.0687069	0.797826	0.87875	7.80946	4.00777	4.25866	4.9582	5.15615
ENSG00000266916.7	ZNF793-AS1	101927720	-0.0116424	2.43117	0.00149958	0.969769	0.983813	3.73162	5.92298	6.2788	4.88133	5.80066
ENSG00000257135.7	ODC1-DT	101929715	-0.355292	2.3951	1.60885	0.229519	0.395025	5.11655	5.17818	3.60348	5.4963	6.40727
ENSG00000165655.17	ZNF503	84858	-0.157566	2.46059	0.127297	0.727657	0.831651	5.73207	2.12802	7.86215	6.9953	4.58745
ENSG00000204815.10	TTC25	83538	0.731922	2.41996	7.61587	0.0177708	0.0699255	6.15524	6.66779	6.00581	3.88201	3.67754
ENSG00000224358.1	TMCO1-AS1	100147773	0.451945	2.39259	2.09512	0.174252	0.327973	5.80901	7.34166	4.14947	3.68983	4.77702
ENSG00000126216.15	TUBGCP3	10426	-0.0472369	7.5021	0.0573368	0.814935	0.88991	185.696	145.237	205.617	203.325	166.21
ENSG00000285244.1	DINOL	108783646	0.554877	2.45298	3.12938	0.103152	0.229412	6.0783	4.64617	7.97135	4.91977	3.52589
ENSG00000112599.9	GUCA1B	2979	0.493651	2.41298	1.2434	0.287387	0.458669	10.2716	2.97922	4.53166	3.92044	4.51163
ENSG00000164841.5	TMEM74	157753	0.513971	2.47307	2.0438	0.179204	0.334544	5.15502	4.11417	9.60929	4.38167	4.35998
ENSG00000259845.1	HERC2P10	390561	0.21822	2.43703	0.383067	0.547929	0.696077	7.38629	3.15656	6.49719	4.68915	5.04241
ENSG00000139445.18	FOXN4	121643	0.0940618	2.39129	0.109818	0.746262	0.845044	4.96266	6.56139	4.31326	4.99664	4.92867
ENSG00000167604.14	NFKBID	84807	-0.379351	2.40499	2.19537	0.165075	0.316477	4.61643	4.53977	4.80465	6.14971	5.95231
ENSG00000167995.16	BEST1	7439	0.87647	2.47315	3.59864	0.0829953	0.198065	8.30958	2.55362	9.4455	3.15173	4.17041
ENSG00000171812.13	COL8A2	1296	-1.34927	2.38213	24.5497	0.000369175	0.0071653	3.50079	3.15656	2.78451	6.9953	9.09908
ENSG00000175536.7	LIPT2	387787	0.071525	2.39724	0.0589757	0.812363	0.887915	4.77031	6.31312	4.75005	4.03575	6.02814
ENSG00000148057.16	IDNK	414328	0.58214	2.3682	2.43381	0.145598	0.290065	5.88595	8.33473	3.2213	3.45921	4.35998
ENSG00000213719.8	CLIC1	1192	-0.0950845	7.49413	0.267803	0.614535	0.749025	186.735	145.663	193.933	192.793	181.944
ENSG00000198496.12	NBR2	10230	0.339457	2.39948	1.10306	0.314985	0.487703	7.96335	4.53977	4.47706	4.11262	4.85284
ENSG00000232671.6	ZNF687-AS1	100507670	0.247352	2.41686	0.677278	0.427122	0.595441	7.117	4.0787	5.67822	4.72759	4.7391
ENSG00000085644.14	ZNF213	7760	-0.541955	2.39344	3.37624	0.091879	0.212646	5.53972	3.61763	3.93107	7.30278	5.42154
ENSG00000144182.17	LIPT1	51601	0.727777	2.42161	6.20009	0.0290389	0.0964119	7.07853	5.24911	6.55179	3.15173	4.4358
ENSG00000163840.10	DTX3L	151636	1.14285	2.37397	10.0092	0.0084843	0.0431773	7.38629	8.33473	3.76728	2.61363	3.29842
ENSG00000163874.11	ZC3H12A	80149	-0.48027	2.4188	1.88382	0.195857	0.355544	5.61666	2.51815	5.56902	6.9953	5.68693
ENSG00000185875.13	THNSL1	79896	0.222764	2.36899	0.412782	0.533054	0.68396	5.80901	7.12886	3.1121	4.18949	5.04241
ENSG00000144191.12	CNGA3	1261	-0.490933	2.38312	2.87758	0.116466	0.248843	3.53926	5.67471	3.98567	5.99597	6.40727
ENSG00000235437.8	LINC01278	92249	0.173497	2.41672	0.398197	0.540257	0.690192	5.46278	4.89444	6.2242	5.4963	4.28415
ENSG00000257056.3	LINC02282	105370424	0.619669	2.35257	1.85426	0.199151	0.360191	4.15479	10.25	2.94831	3.38234	4.20832
ENSG00000004455.17	AK2	204	0.0759921	7.47488	0.18665	0.673642	0.79232	167.23	206.843	170.51	171.5	172.958
ENSG00000101180.16	HRH3	11255	-1.03772	2.37518	11.0426	0.00634448	0.0359942	4.61643	3.29843	2.78451	8.91708	5.80066
ENSG00000143443.10	C1orf56	54964	0.0971105	2.40754	0.130286	0.724624	0.829527	5.92442	4.57524	5.62362	4.8429	5.19406
ENSG00000144061.12	NPHP1	4867	0.0130805	2.37938	0.00186389	0.966298	0.981502	4.73184	6.52592	4.09487	4.26636	5.9144
ENSG00000206417.8	H1FX-AS1	339942	0.0384263	2.40887	0.0193666	0.891707	0.935901	4.50102	5.39098	6.00581	4.57385	5.72484
ENSG00000155760.2	FZD7	8324	-0.183455	2.43128	0.301845	0.593148	0.73292	4.6549	3.33389	7.26157	6.14971	5.3078
ENSG00000184068.2	SREBF2-AS1	112637020	0.271858	2.42617	0.76754	0.398759	0.569761	6.23218	3.93683	6.98858	5.18882	4.24624
ENSG00000026297.15	RNASET2	8635	-0.749093	2.38751	7.29828	0.0197625	0.0748362	4.80878	3.22749	4.09487	6.53407	7.05179
ENSG00000172818.10	OVOL1	5017	1.91009	2.45165	30.3764	0.000151217	0.00421225	8.42499	5.24911	9.4455	1.69117	2.38851
ENSG00000248971.2	KRT8P46	100418744	0.21326	2.42336	0.458468	0.511619	0.666468	6.27065	3.72403	6.87938	5.18882	4.47371
ENSG00000182796.14	TMEM198B	440104	-0.406907	2.37361	2.03684	0.17989	0.335307	5.53972	4.43337	3.49429	6.26502	5.68693
ENSG00000160679.13	CHTOP	26097	-0.47651	7.46754	7.92101	0.0160781	0.0653626	151.727	159.708	147.415	195.061	230.586
ENSG00000183935.5	HTR7P1	93164	-0.155899	2.40463	0.316702	0.58431	0.725996	4.2702	4.78804	5.95121	6.07284	5.04241
ENSG00000267534.4	S1PR2	9294	-0.692199	2.36976	5.75995	0.0341684	0.107799	5.11655	3.93683	3.1121	6.26502	6.90014
ENSG00000126522.17	ASL	158	-0.570788	2.37772	4.76432	0.0503972	0.14069	4.73184	4.14963	3.93107	6.14971	6.55892
ENSG00000139675.12	HNRNPA1L2	144983	0.239699	2.36716	0.606025	0.451877	0.616818	5.15502	7.05792	3.93107	4.26636	4.89076
ENSG00000159761.15	C16orf86	388284	-1.14362	2.36971	12.2137	0.00464449	0.0295268	4.88572	2.44722	2.89371	6.68781	8.41665
ENSG00000160539.6	PLPP7	84814	-0.542473	2.37954	2.81964	0.119827	0.254059	6.15524	3.08563	3.71268	6.61094	5.99023
ENSG00000183044.12	ABAT	18	1.54096	2.38829	26.2276	0.000281385	0.00614084	6.42453	8.65394	5.89661	2.45988	2.3506
ENSG00000161835.11	GRASP	160622	-0.126273	2.40642	0.196196	0.665956	0.786832	4.77031	4.1851	6.2242	6.07284	4.92867
ENSG00000256235.2	SMIM3	85027	-0.139101	2.39329	0.265721	0.615899	0.749968	5.34737	4.2915	5.29603	4.99664	5.95231
ENSG00000262246.6	CORO7	79585	-1.23203	2.37203	20.1375	0.000807223	0.0108997	3.92397	2.69549	3.2759	7.84088	7.65839
ENSG00000143398.20	PIP5K1A	8394	-0.179621	7.47634	1.16173	0.303013	0.474697	181.156	158.254	167.671	191.833	191.043
ENSG00000285219.2	HULC	728655	0.8205	2.37887	7.92079	0.0160792	0.0653626	5.92442	7.55446	5.07764	3.26703	3.75337
ENSG00000149646.12	CNBD2	140894	0.442551	2.4329	1.74125	0.212434	0.374816	5.88595	3.83043	8.29893	4.45854	4.32206
ENSG00000171119.2	NRTN	4902	-0.86381	2.36051	10.1292	0.00819641	0.042203	3.65468	4.46884	3.2213	7.18748	6.63475
ENSG00000185220.12	PGBD2	267002	0.260965	2.36842	0.852207	0.374733	0.547065	5.77054	6.24218	4.25866	4.38167	4.70119
ENSG00000116954.8	RRAGC	64121	0.523755	2.40689	3.26681	0.0966784	0.219959	5.96289	5.03631	6.93398	4.80446	3.48798
ENSG00000117266.15	CDK18	5129	0.179564	2.36705	0.323426	0.5804	0.72264	5.88595	5.88751	4.14947	5.9191	3.48798
ENSG00000119411.11	BSPRY	54836	0.674342	2.39886	5.96111	0.0316998	0.10247	5.6936	6.02938	6.66099	3.34391	4.32206
ENSG00000147437.10	GNRH1	2796	0.726167	2.41469	5.48843	0.0378758	0.115809	6.92465	4.53977	7.37076	4.3048	3.2605
ENSG00000153896.19	ZNF599	148103	-0.467856	2.34229	1.77377	0.208496	0.370978	3.92397	6.34859	2.56612	5.72692	6.2177
ENSG00000166823.5	MESP1	55897	-1.1249	2.37417	17.0449	0.00150091	0.0154816	3.57773	2.83736	3.98567	7.18748	7.88587
ENSG00000140740.11	UQCRC2	7385	-0.17075	7.48274	0.896705	0.362977	0.536673	186.119	143.287	181.321	195.215	188.01
ENSG00000228486.10	C2orf92	728537	0.359741	2.3456	0.941846	0.351606	0.525524	5.46278	7.69633	3.1667	3.42078	5.11823
ENSG00000087495.17	PHACTR3	116154	0.166499	2.37272	0.385031	0.546922	0.695437	5.34737	5.81658	4.80465	4.38167	5.11823
ENSG00000155666.11	KDM8	79831	-0.585538	2.36114	4.46406	0.0570229	0.153472	4.57796	4.3979	3.60348	5.381	7.24135
ENSG00000168517.10	HEXIM2	124790	-0.259185	2.37718	0.869257	0.370162	0.543395	5.65513	3.9723	4.58625	6.11128	5.23197
ENSG00000212127.6	TAS2R14	50840	0.592994	2.37923	4.41833	0.0581223	0.155435	5.38584	6.80966	5.56902	3.42078	4.4358
ENSG00000061656.10	SPAG4	6676	-0.594559	2.3792	4.89706	0.0477662	0.136034	4.23173	3.68856	4.85924	6.84155	5.99023
ENSG00000103254.10	ANTKMT	65990	-1.52301	2.35311	18.4443	0.00112415	0.013061	4.38561	1.77335	2.40232	8.37898	8.07543
ENSG00000064012.22	CASP8	841	-1.03594	2.32892	7.11404	0.0210396	0.0783293	2.73139	5.63925	1.91094	6.76468	7.46883
ENSG00000116035.4	VAX2	25806	-1.02504	2.36002	15.6345	0.00204037	0.0184953	3.26997	3.7595	3.65808	7.22591	7.27926
ENSG00000184619.6	KRBA2	124751	0.172626	2.36067	0.336832	0.572766	0.716267	4.38561	6.91606	4.53166	4.8429	4.54954
ENSG00000009307.16	CSDE1	7812	0.095794	9.67416	0.256552	0.621989	0.754725	758.48	807.476	949.464	768.637	800.529
ENSG00000170836.12	PPM1D	8493	1.58373	7.53253	60.9022	5.97483e-06	0.0006915	240.054	213.866	303.293	81.2531	87.1237
ENSG00000196296.13	ATP2A1	487	0.179299	2.37532	0.378446	0.550315	0.698465	6.84771	4.36244	4.85924	4.80446	4.66328
ENSG00000131187.9	F12	2161	-0.0541745	2.36313	0.0305889	0.864176	0.919918	6.69383	4.1851	4.04027	5.80379	4.54954
ENSG00000258568.1	RHOQP1	319093	0.13295	2.37975	0.256077	0.622308	0.75501	5.42431	4.96537	5.56902	4.61228	5.08032
ENSG00000177508.12	IRX3	79191	0.264343	2.39753	0.772941	0.397157	0.568286	4.15479	5.42644	7.20697	4.76603	4.51163
ENSG00000135919.13	SERPINE2	5270	2.2408	2.40905	55.1756	9.69495e-06	0.000870642	8.23264	6.45499	8.40813	1.69117	1.55443
ENSG00000104983.8	CCDC61	729440	-0.599769	2.35934	5.19623	0.0424187	0.125342	4.61643	3.72403	4.20407	6.30345	6.36936
ENSG00000110031.12	LPXN	9404	-0.107469	2.34236	0.133976	0.720933	0.826807	5.19349	5.74565	3.49429	5.03508	5.38362
ENSG00000187650.4	VMAC	400673	-1.00051	2.35541	8.14134	0.0149741	0.0624936	5.23196	2.09255	3.43969	7.34122	7.01387
ENSG00000260589.1	STAM-AS1	102723166	0.167031	2.33872	0.241862	0.632039	0.761819	6.11677	6.06485	3.33049	3.61296	5.64901
ENSG00000215475.5	SIAH3	283514	0.607626	2.35024	3.83443	0.0746975	0.183904	4.96266	7.69633	4.75005	4.18949	3.45007
ENSG00000167635.11	ZNF146	7705	-0.134208	7.45624	0.512621	0.488171	0.648942	182.003	185.776	138.953	173.691	197.147
ENSG00000237973.1	MTCO1P12	107075141	-2.01742	2.33556	30.0825	0.000157679	0.00433836	2.11586	2.41175	2.12933	12.9144	5.11823
ENSG00000283498.1	MIR1244-2	100422885	1.88892	2.40652	24.9511	0.000345545	0.006857	7.84793	5.99392	8.46273	1.19151	2.80555
ENSG00000104140.7	RHOV	171177	-0.00938463	2.38695	0.000912835	0.976411	0.987775	4.07785	4.5043	6.93398	5.88066	4.47371
ENSG00000170345.10	FOS	2353	0.0128316	2.36599	0.00134383	0.971381	0.985221	6.65536	3.51123	5.13224	3.61296	6.48309
ENSG00000189369.9	GSPT2	23708	-0.111476	2.34011	0.0979266	0.759887	0.854218	2.96221	7.19979	4.25866	5.30413	5.11823
ENSG00000278916.1	CEP83-DT	144486	0.0424511	2.33731	0.0189586	0.892846	0.936465	5.73207	5.67471	3.60348	4.07418	5.68693
ENSG00000104447.12	TRPS1	7227	3.35516	2.43854	58.3285	7.38985e-06	0.000763703	9.84839	4.64617	10.9197	0.691843	0.947821
ENSG00000174353.17	STAG3L3	54441	-0.314607	2.34315	1.29728	0.277688	0.448616	5.27043	4.5043	3.82188	6.14971	5.15615
ENSG00000272031.3	ANKRD34A	284615	-0.170885	2.36365	0.29534	0.597108	0.735674	4.77031	4.32697	5.40523	7.07217	3.79128
ENSG00000168000.14	BSCL2	26580	-0.477634	2.35365	2.40633	0.147688	0.292717	5.53972	2.97922	4.53166	5.72692	6.36936
ENSG00000096654.15	ZNF184	7738	0.105861	7.49266	0.341039	0.570413	0.714465	169.346	171.199	215.336	165.696	178.607
ENSG00000106246.17	PTCD1	26024	-0.471895	2.32928	2.56303	0.136254	0.277411	3.92397	5.24911	3.60348	4.91977	6.93805
ENSG00000239264.9	TXNDC5	81567	-0.272232	2.35119	0.990687	0.339886	0.512629	4.92419	4.1851	4.80465	6.38033	4.81493
ENSG00000099625.13	CBARP	255057	-0.9222	2.33167	9.90658	0.00874034	0.0440554	4.6549	3.01469	3.2213	7.6487	6.14188
ENSG00000186615.11	KTN1-AS1	100129075	-0.289266	2.32785	1.0549	0.325325	0.49783	4.80878	5.17818	3.54889	5.9191	5.15615
ENSG00000116990.11	MYCL	4610	-0.289186	2.32028	0.650691	0.436094	0.603168	3.69315	6.31312	3.43969	7.14904	3.86711
ENSG00000215030.5	RPL13P12	388344	-1.41796	2.33605	25.701	0.000305993	0.00640581	2.92374	2.41175	3.60348	8.30211	7.54465
ENSG00000246922.8	UBAP1L	390595	0.159198	2.3232	0.143669	0.711508	0.819975	8.73275	3.68856	2.89371	4.18949	5.00449
ENSG00000274290.2	H2BC6	8339	0.303184	2.33411	1.19419	0.296664	0.467896	5.53972	6.10032	4.42246	4.26636	4.4358
ENSG00000167791.14	CABP2	51475	0.879471	2.31983	6.49572	0.026107	0.0900467	5.19349	8.54754	4.20407	3.57452	2.9572
ENSG00000234684.7	SDCBP2-AS1	100507495	0.658126	2.31391	3.55997	0.0844615	0.200829	6.19371	7.44806	3.43969	4.07418	3.18468
ENSG00000137876.10	RSL24D1	51187	0.501645	7.53459	3.03206	0.108062	0.236694	213.51	124.879	291.882	137.561	159.082
ENSG00000254585.5	MAGEL2	54551	-0.581002	2.33143	2.55342	0.136923	0.278266	6.23218	2.73096	3.38509	7.34122	5.00449
ENSG00000282757.4	DUXB	100033411	1.01862	2.37609	9.28565	0.0104992	0.0495646	5.77054	5.99392	7.58916	4.18949	2.16103
ENSG00000150456.11	EEF1AKMT1	221143	0.308776	2.33083	1.22743	0.290352	0.461048	5.38584	6.13578	4.53166	3.99731	4.66328
ENSG00000109854.13	HTATIP2	10553	0.786535	2.30379	4.18455	0.0641605	0.166086	7.19394	7.23526	2.94831	3.7667	2.99511
ENSG00000177692.11	DNAJC28	54943	0.158906	2.31739	0.264416	0.616758	0.750764	4.46255	6.88059	3.93107	4.53541	4.62537
ENSG00000183250.12	LINC01547	84536	-0.233116	2.32182	0.524077	0.483453	0.64476	3.30844	6.27765	4.14947	4.72759	6.06605
ENSG00000272533.1	SNORA28	677811	-0.343068	2.37406	0.865214	0.371239	0.544216	3.92397	3.05016	6.98858	7.18748	4.51163
ENSG00000128311.14	TST	7263	-0.855332	2.32455	7.82124	0.0166096	0.0667545	4.96266	2.73096	3.43969	7.1106	6.33144
ENSG00000161277.11	THAP8	199745	0.0313871	2.32112	0.0125487	0.912722	0.950004	5.19349	5.63925	3.98567	5.15038	4.54954
ENSG00000248587.8	GDNF-AS1	100861519	0.821937	2.34931	3.98464	0.0699369	0.176133	9.54063	3.40483	5.29603	4.11262	2.76764
ENSG00000123983.14	ACSL3	2181	0.314031	7.47269	2.75088	0.123974	0.260326	168.692	219.647	189.511	138.445	171.442
ENSG00000114450.10	GNB4	59345	0.958083	2.36343	11.6104	0.0054421	0.0326508	6.42453	5.39098	7.15237	3.38234	3.10885
ENSG00000136114.17	THSD1	55901	0.284033	2.32877	1.00787	0.335899	0.508869	6.27065	5.14271	4.53166	4.80446	3.94293
ENSG00000172878.14	METAP1D	254042	0.269568	2.28898	0.415292	0.531834	0.682981	4.42408	8.2638	2.62072	3.53608	5.00449
ENSG00000077092.19	RARB	5915	2.8386	2.34957	63.0515	5.03212e-06	0.000631267	9.07898	7.23526	6.71559	1.38369	0.758257
ENSG00000086619.14	ERO1B	56605	0.712918	2.35282	5.25825	0.0414021	0.123312	7.23241	4.43337	6.2788	3.11329	4.17041
ENSG00000115155.17	OTOF	9381	1.58962	2.36621	26.1281	0.000285852	0.00620811	8.27111	5.21364	7.42536	2.30614	2.31268
ENSG00000129354.11	AP1M2	10053	-1.02114	2.32795	14.0962	0.00291011	0.0226631	3.30844	3.05016	4.14947	7.34122	6.82431
ENSG00000196381.11	ZNF781	163115	0.179048	2.28775	0.18518	0.674846	0.793127	4.38561	7.9446	2.62072	3.45921	5.42154
ENSG00000205559.5	CHKB-DT	100144603	-0.53832	2.31038	3.62994	0.0818313	0.195965	3.84703	5.03631	3.43969	5.53474	6.44518
ENSG00000151967.18	SCHIP1	29970	0.0509147	2.32543	0.0369561	0.850879	0.912359	4.84725	5.39098	4.75005	4.61228	5.04241
ENSG00000163960.12	UBXN7	26043	0.278194	7.50003	2.00773	0.182794	0.339175	191.428	158.75	233.735	164.236	156.694
ENSG00000205323.9	SARNP	84324	0.577697	2.37261	2.85965	0.117493	0.250441	6.27065	3.6531	7.86215	3.65139	4.24624
ENSG00000198680.4	TUSC1	286319	-0.760106	2.31141	6.68039	0.0244545	0.086407	3.92397	3.79496	3.71268	4.8429	8.07543
ENSG00000215039.7	CD27-AS1	678655	0.473354	2.30917	2.35093	0.15202	0.298735	6.65536	5.81658	3.93107	4.38167	3.52589
ENSG00000253485.2	PCDHGA5	56110	-0.42483	2.30437	2.16066	0.168181	0.320479	3.80856	5.39098	3.54889	6.11128	5.34571
ENSG00000095383.20	TBC1D2	55357	0.126275	2.3047	0.167807	0.689532	0.803216	5.96289	5.39098	3.65808	5.34256	3.86711
ENSG00000186787.8	SPIN2B	474343	-0.325168	2.34327	1.02081	0.332939	0.506152	4.61643	3.12109	5.95121	4.80446	6.55892
ENSG00000130203.10	APOE	348	0.256966	2.33935	0.644664	0.43817	0.604829	6.69383	3.51123	5.84201	4.26636	4.66328
ENSG00000189136.9	UBE2Q2P1	388165	0.906314	2.35114	9.66234	0.0093871	0.0462116	6.27065	5.21364	7.15237	3.72826	2.88138
ENSG00000131055.5	COX4I2	84701	-1.20436	2.27085	7.06072	0.0214273	0.0791567	1.76963	5.67471	1.74714	8.0715	6.25562
ENSG00000232859.9	LYRM9	201229	-0.643168	2.2992	4.40366	0.0584803	0.156038	5.3089	3.36936	3.1121	5.61161	6.71057
ENSG00000204569.10	PPP1R10	5514	-0.402342	7.44297	4.45174	0.0573167	0.153969	161.46	174.32	126.395	186.183	221.146
ENSG00000276710.4	CSPG4P10	390627	0.354506	2.30343	1.27758	0.281181	0.452143	7.00159	5.07177	3.82188	3.92044	4.39789
ENSG00000142684.9	ZNF593	51042	-0.626897	2.3037	5.57992	0.0365751	0.113144	4.34714	3.8659	3.71268	6.5725	5.72484
ENSG00000197093.11	GAL3ST4	79690	0.0717196	2.29949	0.0486422	0.829277	0.899376	6.96312	4.1851	3.60348	4.80446	4.58745
ENSG00000249348.1	UGDH-AS1	100885776	-0.128914	2.30336	0.214684	0.651694	0.776554	5.61666	4.3979	3.98567	5.03508	5.19406
ENSG00000075399.14	VPS9D1	9605	-1.02266	2.28809	14.5116	0.00263819	0.0215218	3.65468	3.58216	2.89371	6.61094	7.16553
ENSG00000242612.7	DECR2	26063	-1.0119	2.27334	9.21034	0.0107399	0.0502137	4.15479	3.93683	1.91094	6.84155	6.74848
ENSG00000102981.9	PARD6A	50855	-0.683338	2.28494	5.78806	0.0338099	0.107177	4.46255	4.0787	2.94831	5.84223	6.52101
ENSG00000232104.3	RFX3-AS1	101929302	0.031939	2.29879	0.0135594	0.909292	0.947858	5.15502	5.24911	4.20407	5.18882	4.35998
ENSG00000115170.15	ACVR1	90	0.0578408	2.32501	0.0340946	0.856695	0.915763	5.11655	4.0787	5.89661	6.0344	3.60172
ENSG00000178814.17	OPLAH	26873	-1.3885	2.28967	22.3034	0.000542507	0.00891212	3.61621	2.16348	2.94831	7.22591	7.99961
ENSG00000140022.13	STON2	85439	-0.184481	7.48446	0.903728	0.361173	0.535063	166.153	138.853	204.307	197.367	188.389
ENSG00000131778.19	CHD1L	9557	-0.432199	2.31803	2.08	0.175694	0.32985	3.61621	3.68856	5.67822	6.41876	5.19406
ENSG00000104691.15	UBXN8	7993	0.79137	2.3	5.62245	0.0359887	0.11187	5.38584	6.70325	5.40523	2.26771	4.47371
ENSG00000110324.10	IL10RA	3587	0.678986	2.29541	5.6	0.0362968	0.112554	6.65536	5.67471	4.69545	3.7667	3.33633
ENSG00000147027.4	TMEM47	83604	-0.454483	2.28318	2.08082	0.175614	0.329776	2.92374	5.60378	3.93107	5.41943	5.99023
ENSG00000129932.10	DOHH	83475	-1.4963	2.28021	28.8361	0.000188958	0.00483555	2.96221	2.30535	3.0029	6.91843	8.60621
ENSG00000181029.9	TRAPPC5	126003	-1.01844	2.28289	14.5543	0.00261194	0.0213855	3.69315	3.12109	3.33049	7.37965	6.33144
ENSG00000230267.7	HERC2P4	100289574	-0.655335	2.29355	5.56007	0.0368527	0.11363	4.23173	3.12109	4.42246	6.22658	6.10397
ENSG00000237638.2	LINC02245	400958	0.00922065	2.30036	0.00116714	0.973328	0.986366	5.19349	4.22057	5.18683	4.8429	4.81493
ENSG00000171551.12	ECEL1	9427	1.77381	2.37597	14.7788	0.00247904	0.0206364	8.27111	3.01469	10.4283	2.1524	2.04729
ENSG00000114395.10	CYB561D2	11068	-0.831917	2.26765	7.69377	0.0173193	0.0689047	4.6549	3.15656	2.94831	5.61161	7.20344
ENSG00000069956.12	MAPK6	5597	0.306197	7.5006	2.22562	0.162428	0.312739	174.039	166.269	247.876	157.356	159.689
ENSG00000249850.1	KRT18P31	646723	-0.206971	2.32098	0.361272	0.559363	0.706053	4.03938	3.26296	6.71559	6.30345	4.39789
ENSG00000181031.16	RPH3AL	9501	-0.63378	2.28257	5.48228	0.0379653	0.116004	4.07785	3.47576	4.20407	6.64938	5.49736
ENSG00000246263.3	UBR5-AS1	101927221	1.29128	2.29887	17.1123	0.00147965	0.0153342	8.19417	5.14271	5.73282	2.6905	2.50225
ENSG00000278175.4	GLIDR	389741	-0.387646	2.25647	1.46858	0.249678	0.41692	3.69315	5.74565	3.0029	5.88066	5.04241
ENSG00000196502.11	SULT1A1	6817	0.232091	2.28639	0.621126	0.446437	0.612281	5.53972	4.75257	5.02304	3.38234	5.3078
ENSG00000204147.10	ASAH2B	653308	-0.11057	2.25932	0.126055	0.72893	0.83245	4.53949	5.67471	3.38509	4.07418	5.76275
ENSG00000224861.1	YBX1P1	50631	0.55618	2.32433	2.37473	0.15014	0.296299	3.30844	5.78111	8.02594	4.07418	3.63963
ENSG00000171100.14	MTM1	4534	0.376005	2.25071	1.05004	0.326395	0.498951	6.50148	5.88751	2.94831	3.11329	4.81493
ENSG00000175344.18	CHRNA7	1139	-0.305161	2.27454	1.23114	0.28966	0.460422	4.61643	4.25603	4.14947	6.14971	4.58745
ENSG00000181019.13	NQO1	1728	0.391556	2.26861	1.70761	0.216611	0.379657	6.38606	5.28458	3.98567	4.34323	3.63963
ENSG00000176788.9	BASP1	10409	0.0403841	7.49265	0.0313915	0.862426	0.919091	140.186	172.689	233.353	200.711	153.282
ENSG00000196372.13	ASB13	79754	-0.704859	2.24327	3.80966	0.0755199	0.185165	4.80878	4.1851	2.02014	4.91977	7.16553
ENSG00000128536.16	CDHR3	222256	-0.247168	2.26932	0.857164	0.373395	0.546045	4.19326	4.85897	4.14947	5.41943	5.04241
ENSG00000189050.16	RNFT1	51136	1.20858	2.27648	16.4642	0.00169976	0.0166623	6.38606	6.91606	5.18683	2.30614	3.03303
ENSG00000239789.6	MRPS17	51373	-0.429413	2.2554	1.53328	0.240096	0.407059	4.61643	4.5043	3.1667	3.57452	7.50674
ENSG00000258675.2	LINC02308	100506700	1.10232	2.34638	7.87913	0.0162987	0.0659428	5.84748	4.11417	9.3909	3.80513	2.16103
ENSG00000260804.3	LINC01963	150967	0.893447	2.21163	2.54942	0.137202	0.278583	4.57796	10.2854	1.63795	2.61363	3.37424
ENSG00000125650.4	PSPN	5623	-1.14264	2.25086	17.1322	0.00147347	0.0152968	3.34691	3.36936	2.67531	6.18815	7.69631
ENSG00000140876.11	NUDT7	283927	0.501948	2.28383	3.1938	0.100053	0.224807	6.34759	4.71711	5.24143	3.99731	3.67754
ENSG00000213782.7	DDX47	51202	0.688427	2.34063	3.33306	0.0937369	0.21568	5.38584	3.47576	9.00871	3.72826	3.60172
ENSG00000123892.12	RAB38	23682	-0.191612	2.27352	0.500099	0.49342	0.652666	3.96244	4.78804	4.75005	5.4963	4.77702
ENSG00000008988.9	RPS20	6224	-0.244539	9.66588	1.68161	0.219915	0.383655	738.937	681.746	848.402	943.789	848.3
ENSG00000230989.7	HSBP1	3281	-0.407241	7.45192	5.88464	0.0326122	0.104675	146.61	167.901	149.872	197.214	213.373
ENSG00000103832.10	GOLGA8UP	100507067	0.203139	2.31053	0.375281	0.551961	0.699662	5.0396	3.40483	7.15237	4.49698	4.47371
ENSG00000186235.11	LINC02610	151174	-0.345346	2.27611	1.37683	0.264174	0.433499	5.11655	3.15656	4.64085	5.30413	5.6111
ENSG00000198673.10	TAFA2	338811	0.720883	2.24846	4.4034	0.0584868	0.156038	4.88572	7.7318	3.93107	3.84357	2.88138
ENSG00000232093.1	DCST1-AS1	100505666	0.203551	2.22997	0.248344	0.627558	0.758866	3.61621	8.051	2.78451	4.34323	4.09459
ENSG00000237187.9	NR2F1-AS1	441094	0.147088	2.27292	0.246312	0.628955	0.759479	6.30912	3.93683	4.58625	4.53541	4.39789
ENSG00000277053.4	GTF2IP1	2970	-0.245909	2.27053	0.792852	0.391334	0.5631	4.19326	4.46884	4.58625	6.0344	4.4358
ENSG00000100084.14	HIRA	7290	-0.512864	2.25734	3.14706	0.10229	0.228117	3.34691	4.68164	3.98567	4.8429	6.59683
ENSG00000179965.12	ZNF771	51333	-0.181539	2.27866	0.429576	0.524984	0.678068	4.03938	4.2915	5.29603	5.57318	4.70119
ENSG00000217527.1	RPS16P5	647190	-0.189257	2.30058	0.269486	0.613438	0.748196	4.69337	2.80189	6.388	6.4572	4.01876
ENSG00000259660.2	DNM1P47	100216544	0.190697	2.22814	0.240164	0.633226	0.762788	3.77009	7.7318	2.89371	4.34323	4.1325
ENSG00000197771.12	MCMBP	79892	-0.0412173	7.47207	0.0581203	0.813701	0.888921	160.113	173.504	192.732	177.304	183.726
ENSG00000154040.20	CABYR	26256	1.29176	2.27925	18.2828	0.00116143	0.0131783	6.50148	6.20672	6.115	3.11329	2.00938
ENSG00000204851.7	PNMA8B	57469	-0.668046	2.26228	5.52001	0.0374206	0.11477	4.07785	3.22749	4.14947	6.9953	5.11823
ENSG00000225880.5	LINC00115	79854	1.18942	2.33496	9.39806	0.0101518	0.0486439	6.53995	3.5467	9.3909	2.88268	2.76764
ENSG00000232629.9	HLA-DQB2	3120	-0.112963	2.27784	0.133575	0.721331	0.827099	5.34737	3.26296	5.29603	4.38167	5.6111
ENSG00000062038.14	CDH3	1001	-0.715975	2.25082	2.28019	0.157787	0.306286	6.57842	1.48961	3.0575	5.11195	7.0897
ENSG00000150667.8	FSIP1	161835	-0.83656	2.23945	7.05208	0.021491	0.0793006	2.76986	4.53977	3.2213	5.03508	7.54465
ENSG00000165171.11	METTL27	155368	0.830024	2.25773	7.56251	0.0180882	0.0709564	6.92465	5.56831	4.58625	3.57452	2.84346
ENSG00000176222.9	ZNF404	342908	0.398476	2.24453	1.32855	0.272264	0.442685	7.30935	4.64617	3.43969	3.45921	4.35998
ENSG00000212802.4	RPL15P3	653232	-1.33018	2.24607	18.9296	0.00102033	0.0123924	3.73162	2.05708	2.89371	7.6487	6.90014
ENSG00000240489.1	SETP14	389168	0.198048	2.28457	0.480785	0.501716	0.659007	4.61643	4.3979	6.2242	4.65072	4.17041
ENSG00000116984.13	MTR	4548	-0.136916	7.43746	0.39464	0.542042	0.691242	145.764	219.292	134.694	182.147	184.294
ENSG00000179598.6	PLD6	201164	-0.325707	2.24322	1.28183	0.280422	0.451266	5.11655	4.11417	3.38509	5.68848	4.89076
ENSG00000204060.7	FOXO6	100132074	-0.172668	2.26244	0.417216	0.530901	0.682537	4.15479	4.46884	4.85924	5.30413	4.81493
ENSG00000142173.16	COL6A2	1292	0.637493	2.33245	1.24979	0.286212	0.457241	7.117	1.38321	9.11791	3.11329	4.35998
ENSG00000225465.9	RFPL1S	10740	-1.60365	2.21604	23.1787	0.000465504	0.00813641	2.26975	3.51123	1.63795	6.80312	8.41665
ENSG00000115226.10	FNDC4	64838	1.48866	2.27523	24.0215	0.000403223	0.00746483	7.77099	5.32004	6.2242	2.42145	2.16103
ENSG00000241370.5	RPP21	79897	0.719926	2.33215	2.64513	0.130708	0.270103	3.07762	4.64617	10.2099	4.03575	3.14677
ENSG00000249661.1	TNRC18P1	644962	-0.373317	2.2667	1.55546	0.236926	0.403629	4.61643	3.05016	5.07764	5.80379	5.15615
ENSG00000277232.2	GTSE1-DT	150384	0.0461119	2.23771	0.0228172	0.882529	0.930839	6.00136	4.57524	3.43969	4.76603	4.32206
ENSG00000168026.18	TTC21A	199223	-0.00426578	2.24852	0.000242655	0.987836	0.993262	5.0396	4.57524	4.36786	5.18882	4.17041
ENSG00000245275.8	SAP30L-AS1	386627	0.854425	2.24703	7.57976	0.0179849	0.0706129	6.50148	5.88751	4.64085	2.49832	3.79128
ENSG00000077232.18	DNAJC10	54431	0.196667	7.45043	1.01134	0.3351	0.508059	198.853	198.012	155.714	138.791	182.702
ENSG00000107742.13	SPOCK2	9806	0.68917	2.2179	3.0274	0.108304	0.237138	3.77009	8.6894	3.60348	3.34391	3.33633
ENSG00000066032.18	CTNNA2	1496	3.64151	2.29076	113.01	2.50198e-07	0.000112208	6.77077	7.76726	8.51733	0.5381	0.682431
ENSG00000171608.16	PIK3CD	5293	-0.0672499	2.27211	0.0387225	0.847405	0.910192	5.46278	2.76642	5.84201	5.26569	4.51163
ENSG00000196189.13	SEMA4A	64218	-0.100909	2.21707	0.0964536	0.761637	0.855324	4.69337	5.67471	2.83911	5.07351	4.4358
ENSG00000237149.5	ZNF503-AS2	100131213	-0.309344	2.23147	1.22281	0.291218	0.461743	4.15479	4.82351	3.60348	5.72692	4.70119
ENSG00000245532.9	NEAT1	283131	0.838849	2.27091	6.2647	0.0283658	0.0950064	6.96312	4.2915	6.115	4.03575	2.42642
ENSG00000265112.1	MIR3153	100422936	-1.33786	2.24886	11.1138	0.00622219	0.0354912	3.53926	1.38321	3.82188	9.03239	5.57319
ENSG00000151006.7	PRSS53	339105	-0.721762	2.23657	6.50126	0.0260555	0.0899949	2.92374	4.00777	4.09487	6.53407	5.57319
ENSG00000228903.7	RASA4CP	401331	-0.722546	2.23044	6.46638	0.0263816	0.0906802	4.38561	3.12109	3.43969	5.41943	6.63475
ENSG00000268364.2	SMC5-AS1	100507299	-0.22227	2.22591	0.611463	0.449906	0.615579	4.23173	5.03631	3.60348	5.53474	4.51163
ENSG00000244754.8	N4BP2L2	10443	0.53792	7.47731	9.36744	0.0102451	0.048968	217.549	184.215	208.62	131.45	148.808
ENSG00000063180.9	CA11	770	0.332782	2.24374	1.13072	0.30926	0.481743	4.03938	5.95845	5.24143	4.91977	3.14677
ENSG00000176410.8	DNAJC30	84277	-0.0822715	2.25214	0.0892656	0.770398	0.860533	4.34714	4.0787	5.35063	4.68915	5.00449
ENSG00000110801.14	PSMD9	5715	-0.183083	2.24456	0.404818	0.536964	0.687405	4.88572	3.44029	4.96844	4.68915	5.34571
ENSG00000113070.8	HBEGF	1839	0.527541	2.28141	2.04135	0.179446	0.334832	5.80901	3.22749	7.47996	3.07486	4.51163
ENSG00000125968.9	ID1	3397	-0.552533	2.25664	2.41558	0.14698	0.2917	4.30867	2.19895	5.45983	5.95753	5.64901
ENSG00000131061.14	ZNF341	84905	-0.0821545	2.24252	0.0833398	0.777916	0.865717	5.07808	3.72403	4.85924	5.30413	4.32206
ENSG00000165591.6	FAAH2	158584	2.4707	2.28996	46.6387	2.17136e-05	0.00141544	8.50193	4.78804	8.40813	1.19151	1.40277
ENSG00000246174.9	KCTD21-AS1	100289388	0.747093	2.23751	6.90082	0.0226423	0.081891	5.92442	5.49738	5.18683	2.84424	3.75337
ENSG00000261678.3	SCRT1	83482	-0.0791789	2.22256	0.0829865	0.778373	0.865937	4.53949	4.89444	3.98567	5.15038	4.32206
ENSG00000205534.6	SMG1P2	440354	-0.0787838	2.25514	0.0598581	0.810995	0.887144	4.57796	3.33389	5.95121	5.72692	3.98085
ENSG00000113300.13	CNOT6	57472	0.426588	7.47936	5.64073	0.0357401	0.111329	191.043	189.074	216.1	163.198	132.505
ENSG00000089558.9	KCNH4	23415	-0.0595958	2.2115	0.0414997	0.842107	0.907518	5.11655	4.75257	3.49429	5.18882	4.1325
ENSG00000162755.14	KLHDC9	126823	-0.17378	2.19222	0.254392	0.623443	0.755978	4.6549	5.56831	2.45692	4.53541	5.08032
ENSG00000176092.15	CRYBG2	55057	-0.483615	2.21537	3.30696	0.0948824	0.21733	3.96244	4.14963	3.65808	5.34256	5.64901
ENSG00000204427.12	ABHD16A	7920	0.145155	2.24645	0.252793	0.624525	0.756609	4.11632	4.6107	5.89661	4.80446	3.98085
ENSG00000118503.15	TNFAIP3	7128	-1.93764	2.19951	38.7538	5.13198e-05	0.00229011	1.50034	2.51815	2.29313	9.22457	6.90014
ENSG00000125843.11	AP5S1	55317	-0.445966	2.19449	1.82194	0.202836	0.364798	3.50079	5.39098	2.78451	4.53541	6.14188
ENSG00000143545.10	RAB13	5872	0.662743	2.2574	4.43182	0.0577954	0.15493	4.00091	5.56831	7.09777	3.68983	3.29842
ENSG00000147509.14	RGS20	8601	-0.979623	2.19624	11.1769	0.0061161	0.0350836	3.77009	3.51123	2.34772	6.18815	6.55892
ENSG00000149295.14	DRD2	1813	2.05357	2.29472	32.6968	0.000109789	0.00355106	6.77077	4.85897	9.4455	1.88335	1.4786
ENSG00000197106.7	SLC6A17	388662	-1.84589	2.17078	14.716	0.00251542	0.0208288	1.46187	4.04323	0.818974	7.91775	7.62048
ENSG00000083896.12	YTHDC1	91746	0.448697	7.506	4.09637	0.0666342	0.170838	182.888	161.481	266.166	143.48	154.646
ENSG00000229325.1	ACAP2-IT1	100874306	1.55857	2.24166	13.7186	0.00318642	0.023847	7.34782	5.67471	6.00581	1.03776	3.2605
ENSG00000240053.8	LY6G5B	58496	0.0218651	2.21687	0.00619418	0.93861	0.965106	5.19349	4.57524	3.98567	4.8429	4.20832
ENSG00000105464.3	GRIN2D	2906	-0.60894	2.19992	3.54857	0.0849001	0.201405	3.46232	4.64617	3.0029	7.14904	4.20832
ENSG00000151287.17	TEX30	93081	-0.133268	2.20781	0.228082	0.641823	0.769704	4.53949	4.85897	3.65808	4.45854	5.11823
ENSG00000159251.8	ACTC1	70	-0.170524	2.27052	0.123103	0.731982	0.834758	5.23196	1.45415	7.04317	4.65072	5.53527
ENSG00000171428.14	NAT1	9	0.188251	2.21096	0.383499	0.547708	0.695992	3.84703	6.20672	4.25866	3.95888	4.4358
ENSG00000175602.4	CCDC85B	11007	-1.66292	2.20281	36.2751	6.92189e-05	0.00270527	2.65445	2.02162	2.56612	7.72557	7.54465
ENSG00000270872.2	SRGAP2D	100996712	-0.208586	2.21773	0.487655	0.498737	0.657029	4.53949	4.25603	4.09487	6.18815	3.75337
ENSG00000075426.12	FOSL2	2355	0.980555	2.23171	12.6493	0.00415366	0.0278239	5.77054	5.85205	5.67822	3.03642	2.80555
ENSG00000133250.14	ZNF414	84330	-0.980862	2.20571	11.01	0.00640149	0.0361689	3.8855	2.80189	3.0575	7.57183	5.26988
ENSG00000077254.14	USP33	23032	0.215129	7.48228	1.2814	0.280498	0.451328	185.542	162.119	220.086	149.476	176.522
ENSG00000181638.19	ZFP41	286128	-0.297311	2.18954	0.830157	0.380773	0.552716	3.92397	5.49738	2.78451	4.45854	5.6111
ENSG00000189367.15	KIAA0408	9729	0.305473	2.21758	1.23525	0.288895	0.459979	5.00113	5.24911	4.58625	3.65139	4.35998
ENSG00000159110.19	IFNAR2	3455	-0.0392736	2.19995	0.0158672	0.901917	0.943132	3.73162	5.88751	3.71268	5.15038	4.01876
ENSG00000159885.14	ZNF222	7673	-0.11439	2.20805	0.175327	0.683069	0.798747	4.50102	4.71711	3.93107	5.11195	4.39789
ENSG00000108932.12	SLC16A6	9120	0.568737	2.19676	2.97539	0.111054	0.240721	4.2702	7.16433	4.04027	3.19016	3.79128
ENSG00000158769.18	F11R	50848	-0.0987436	2.21422	0.106027	0.750512	0.847397	5.38584	3.6531	4.25866	3.88201	5.6111
ENSG00000183186.8	C2CD4C	126567	-1.43174	2.20242	20.7902	0.000714013	0.0102388	3.34691	1.77335	2.94831	7.26435	7.20344
ENSG00000085465.13	OVGP1	5016	-0.118033	2.21023	0.0941404	0.764416	0.856747	6.88618	2.51815	3.76728	4.49698	5.04241
ENSG00000091073.19	DTX2	113878	-0.379679	2.22782	1.67252	0.221084	0.385127	3.8855	3.26296	5.24143	5.45787	5.23197
ENSG00000175787.17	ZNF169	169841	0.779962	2.21257	7.72706	0.0171305	0.0683051	5.92442	5.67471	4.80465	3.30547	3.07094
ENSG00000058262.10	SEC61A1	29927	0.0505766	7.46097	0.0609713	0.809283	0.886092	218.319	138.711	178.7	171.193	173.641
ENSG00000254860.6	TMEM9B-AS1	493900	0.0483132	2.19114	0.0254035	0.876107	0.92678	4.92419	5.35551	3.2759	4.72759	4.05667
ENSG00000223764.2	LINC02593	100130417	-1.1126	2.16722	9.11689	0.0110476	0.051176	2.26975	4.71711	1.91094	6.41876	6.55892
ENSG00000228889.7	UBAC2-AS1	100289373	-0.594144	2.15824	1.97588	0.186041	0.343	3.50079	5.71018	1.52875	5.84223	5.11823
ENSG00000181788.4	SIAH2	6478	1.42571	2.23654	22.3043	0.000542415	0.00891212	6.50148	5.35551	6.82478	2.65206	1.97147
ENSG00000231770.6	TMEM44-AS1	100507297	0.0741448	2.18657	0.0637587	0.80507	0.883528	4.77031	5.35551	3.49429	4.07418	4.58745
ENSG00000258783.1	KRT18P6	122592	-0.18422	2.18134	0.363738	0.558046	0.704768	4.61643	4.96537	3.0029	5.26569	4.32206
ENSG00000277363.5	SRCIN1	80725	0.0592397	2.18475	0.0396125	0.845686	0.909496	4.92419	5.28458	3.33049	4.45854	4.24624
ENSG00000117862.13	TXNDC12	51060	-0.683262	2.20823	3.41643	0.0901901	0.209793	4.96266	1.87975	4.14947	5.9191	5.80066
ENSG00000160999.10	SH2B2	10603	-0.300869	2.20948	1.00728	0.336034	0.508881	4.38561	3.47576	4.64085	6.18815	4.05667
ENSG00000137825.11	ITPKA	3706	-0.81334	2.19447	8.94004	0.0116592	0.0528192	3.65468	2.97922	3.71268	6.22658	5.87649
ENSG00000113369.9	ARRDC3	57561	0.227387	7.47416	0.443279	0.518565	0.672489	252.326	112.82	201.14	103.776	218.643
ENSG00000125449.7	ARMC7	79637	-0.311037	2.18121	1.19224	0.297039	0.468225	4.15479	4.53977	3.43969	4.38167	5.68693
ENSG00000164307.13	ERAP1	51752	1.98409	2.20941	43.7148	2.94342e-05	0.00167464	6.77077	6.73872	6.00581	1.80648	1.4786
ENSG00000198400.11	NTRK1	4914	0.0990539	2.17267	0.0855202	0.775116	0.86419	4.07785	6.10032	3.38509	5.18882	3.29842
ENSG00000198734.12	F5	2153	2.43745	2.22239	63.9579	4.68761e-06	0.000617866	7.19394	6.52592	6.82478	1.34525	1.1753
ENSG00000100024.15	UPB1	51733	0.132108	2.13057	0.0545145	0.819456	0.892708	2.61598	8.93767	1.58335	4.8429	3.2605
ENSG00000198590.12	C3orf35	339883	1.19638	2.19556	11.0855	0.00627045	0.0357324	8.5404	4.36244	4.53166	2.61363	2.46433
ENSG00000204311.14	PJVK	494513	0.467871	2.16746	1.89575	0.194548	0.354027	5.3089	6.20672	3.2759	2.92111	4.24624
ENSG00000130038.10	CRACR2A	84766	-0.526565	2.16727	2.39508	0.148555	0.294011	3.30844	4.85897	3.0029	6.95686	3.8292
ENSG00000147168.12	IL2RG	3561	1.78737	2.24016	26.2001	0.000282611	0.00615508	4.38561	6.77419	8.51733	1.96022	1.81982
ENSG00000196208.14	GREB1	9687	2.24866	2.20407	35.3424	7.77883e-05	0.00284784	5.15502	8.33473	6.44259	1.84491	0.947821
ENSG00000080824.18	HSP90AA1	3320	0.241334	9.62773	0.571928	0.464577	0.628226	647.801	1060.85	820.23	995.869	430.386
ENSG00000198521.11	ZNF43	7594	0.189272	7.43768	0.908792	0.35988	0.533759	177.656	214.504	154.513	140.598	179.1
ENSG00000206652.1	RNU1-1	26871	0.180131	2.17512	0.240258	0.63316	0.76276	2.88527	6.88059	4.14947	4.61228	3.60172
ENSG00000225329.3	LHFPL3-AS2	723809	0.0295244	2.1907	0.00939554	0.924436	0.956646	5.80901	3.5467	4.20407	4.80446	4.05667
ENSG00000233844.1	KCNQ5-IT1	100507381	0.333968	2.19573	1.41815	0.257508	0.425167	4.53949	5.17818	5.02304	4.38167	3.41216
ENSG00000260852.1	FBXL19-AS1	283932	0.148113	2.17991	0.27703	0.608572	0.744234	5.15502	4.82351	3.87648	3.95888	4.39789
ENSG00000120594.17	PLXDC2	84898	-3.28303	2.16172	53.4228	1.13389e-05	0.00095051	0.961757	0.35467	1.69255	9.45518	9.36447
ENSG00000128965.13	CHAC1	79094	0.298417	2.24077	0.517943	0.485969	0.647064	5.11655	2.55362	7.58916	3.19016	5.00449
ENSG00000135951.16	TSGA10	80705	0.784055	2.15616	4.26554	0.0619862	0.162308	4.69337	7.69633	3.2759	2.49832	3.60172
ENSG00000136014.12	USP44	84101	0.335792	2.16859	0.887651	0.365324	0.538678	6.7323	4.46884	3.1667	3.07486	4.54954
ENSG00000120327.6	PCDHB14	56122	0.422409	2.16188	1.73817	0.212812	0.375197	5.15502	6.10032	3.33049	3.88201	3.41216
ENSG00000137133.11	HINT2	84681	-0.296944	2.1946	1.0492	0.32658	0.499065	3.46232	3.9723	4.96844	5.65005	4.47371
ENSG00000140374.16	ETFA	2108	-0.0462558	7.455	0.0794841	0.782965	0.869212	173.155	167.369	178.864	181.647	175.878
ENSG00000235174.1	RPL39P3	285785	-0.860395	2.17424	7.817	0.0166326	0.0668249	4.34714	2.48269	3.1667	6.5725	5.53527
ENSG00000164532.11	TBX20	57057	-1.07165	2.17079	13.4338	0.00341537	0.0247548	3.73162	2.34082	3.1121	6.26502	6.59683
ENSG00000109705.8	NKX3-2	579	0.964386	2.22522	9.4251	0.0100702	0.0484169	5.38584	4.43337	7.47996	2.92111	2.9572
ENSG00000105507.3	CABP5	56344	-1.6361	2.12638	10.9269	0.00654937	0.0365437	1.15411	4.5043	1.14656	7.45652	6.93805
ENSG00000122481.17	RWDD3	25950	0.368519	2.18115	1.65427	0.223459	0.38789	4.11632	5.56831	5.02304	3.49765	4.09459
ENSG00000124194.16	GDAP1L1	78997	2.80315	2.23285	46.9976	2.09403e-05	0.00140692	9.23286	4.11417	7.97135	0.999328	1.02365
ENSG00000144959.10	NCEH1	57552	0.654035	2.19012	4.87625	0.0481674	0.136699	6.30912	4.2915	5.18683	3.57452	3.10885
ENSG00000146410.12	MTFR2	113115	0.480915	2.19561	2.69136	0.127709	0.265805	5.77054	4.00777	5.51442	3.45921	3.8292
ENSG00000100379.17	KCTD17	79734	1.77305	2.12325	9.64732	0.00942871	0.0463783	3.34691	11.4204	2.94831	2.22927	1.25112
ENSG00000146360.8	GPR6	2830	0.640084	2.23357	2.65438	0.130101	0.269066	4.38561	3.83043	8.18974	4.49698	2.46433
ENSG00000115183.15	TANC1	85461	-0.192653	7.45358	1.22546	0.290721	0.461526	146.495	169.532	181.212	197.021	181.792
ENSG00000167985.6	SDHAF2	54949	-0.145586	2.15484	0.206492	0.657917	0.780942	5.42431	4.0787	3.0029	3.95888	5.3078
ENSG00000188856.6	RPSAP47	389672	0.812187	2.19985	5.58461	0.0365098	0.112981	3.80856	6.10032	6.55179	3.84357	2.38851
ENSG00000246985.8	SOCS2-AS1	144481	0.464785	2.17285	2.74244	0.124495	0.261085	4.77031	5.56831	4.58625	3.88201	3.33633
ENSG00000281183.1	NPTN-IT1	101241892	0.704867	2.22066	4.56839	0.0546077	0.148854	5.15502	3.90137	7.37076	3.03642	3.63963
ENSG00000112357.13	PEX7	5191	-0.198366	2.13769	0.314512	0.585595	0.727114	4.42408	5.28458	2.40232	3.84357	5.49736
ENSG00000166153.16	DEPDC4	120863	0.341864	2.19133	1.42404	0.256576	0.424441	5.19349	4.00777	5.56902	3.72826	4.01876
ENSG00000227110.7	LMCD1-AS1	100288428	0.195668	2.15121	0.395703	0.541507	0.690854	5.46278	5.07177	3.1667	4.03575	3.98085
ENSG00000232940.6	HCG25	414765	0.78747	2.17522	7.49259	0.0185142	0.0719668	5.65513	5.49738	4.85924	3.49765	2.69181
ENSG00000267454.6	ZNF582-AS1	386758	0.0633736	2.17966	0.0429909	0.839338	0.905242	5.57819	3.44029	4.58625	4.8429	3.8292
ENSG00000183161.6	FANCF	2188	0.4389	2.1482	1.81787	0.203306	0.365296	5.0396	6.02938	3.43969	2.99798	4.17041
ENSG00000010017.13	RANBP9	10048	0.43638	7.4831	4.82873	0.0490992	0.13838	183.311	171.766	244.109	156.664	138.458
ENSG00000228705.2	LINC00659	100652730	0.55672	2.17324	3.18664	0.100391	0.225376	6.42453	4.2915	4.53166	3.99731	2.91929
ENSG00000118495.19	PLAGL1	5325	-0.178076	2.17192	0.371619	0.553877	0.701646	4.73184	3.47576	4.42246	5.45787	4.05667
ENSG00000120915.14	EPHX2	2053	-0.0927203	2.15592	0.113138	0.742606	0.842394	4.19326	4.78804	3.76728	4.57385	4.51163
ENSG00000140280.14	LYSMD2	256586	0.553585	2.19784	3.39854	0.0909374	0.211011	5.27043	4.00777	6.3334	3.42078	3.63963
ENSG00000143819.12	EPHX1	2052	0.320975	2.22462	0.596507	0.455363	0.619667	5.00113	2.48269	7.69835	4.68915	3.33633
ENSG00000158296.14	SLC13A3	64849	-0.598193	2.13051	2.61888	0.132449	0.272697	4.92419	3.83043	1.80174	5.45787	5.3078
ENSG00000230269.7	LINC02525	100507194	0.170835	2.17414	0.170987	0.686779	0.801194	7.38629	2.34082	4.20407	4.4201	3.8292
ENSG00000144550.13	CPNE9	151835	-0.442274	2.15513	2.67512	0.128753	0.267354	4.11632	3.72403	3.60348	4.91977	5.45945
ENSG00000074621.14	SLC24A1	9187	0.0290952	2.12943	0.00724041	0.93364	0.962396	4.50102	5.74565	2.62072	3.99731	4.47371
ENSG00000163624.6	CDS1	1040	0.500926	2.20719	2.14586	0.169528	0.322089	5.15502	3.33389	7.09777	3.80513	3.48798
ENSG00000171467.16	ZNF318	24149	0.0246982	7.44219	0.0158694	0.90191	0.943132	173.963	187.478	163.576	203.94	140.164
ENSG00000173531.15	MST1	4485	-0.0876783	2.15867	0.09625	0.761881	0.855441	3.61621	4.89444	4.31326	4.8429	4.24624
ENSG00000092051.17	JPH4	84502	0.439507	2.14337	1.56301	0.235859	0.402306	3.65468	6.84512	3.98567	4.26636	2.88138
ENSG00000136867.11	SLC31A2	1318	-0.499411	2.13326	2.73165	0.125165	0.262122	4.07785	4.2915	2.62072	5.53474	4.89076
ENSG00000186280.7	KDM4D	55693	0.213079	2.12067	0.240553	0.632954	0.762562	6.50148	4.92991	1.96554	2.95955	4.81493
ENSG00000099953.10	MMP11	4320	-0.182906	2.13396	0.318199	0.583435	0.725412	5.11655	4.22057	2.83911	3.84357	5.42154
ENSG00000153714.6	LURAP1L	286343	1.26434	2.19049	14.8166	0.00245745	0.0205617	6.53995	4.43337	6.71559	2.92111	1.97147
ENSG00000237082.1	COX5BP6	101234262	-0.18842	2.13116	0.369655	0.55491	0.702409	3.84703	5.17818	3.1121	4.03575	5.23197
ENSG00000080603.17	SRCAP	10847	-0.157511	2.16601	0.263188	0.617568	0.751331	3.73162	3.83043	5.13224	5.68848	3.71546
ENSG00000122756.15	CNTFR	1271	0.0665289	2.197	0.0278555	0.870323	0.923666	4.88572	2.26989	6.77018	4.80446	3.98085
ENSG00000141642.9	ELAC1	55520	-0.0726017	2.13642	0.0546475	0.81924	0.892527	3.46232	5.46191	3.71268	3.84357	5.04241
ENSG00000204536.14	CCHCR1	54535	-0.245714	7.44571	2.00357	0.183214	0.339708	177.386	145.166	164.068	181.993	202.644
ENSG00000261087.1	ZNNT1	115830329	0.995153	2.22834	5.11645	0.0437711	0.128156	5.46278	3.01469	9.06331	3.68983	2.12312
ENSG00000264229.1	RNU4ATAC	100151683	-0.813995	2.12787	6.61624	0.025014	0.087676	3.07762	4.04323	2.67531	7.1106	4.4358
ENSG00000095777.17	MYO3A	53904	1.24646	2.15509	16.7595	0.00159501	0.015972	4.96266	6.73872	5.40523	2.11396	2.69181
ENSG00000117154.12	IGSF21	84966	-1.30034	2.1445	17.1485	0.0014684	0.015284	1.92351	2.66002	3.65808	6.53407	6.90014
ENSG00000134369.15	NAV1	89796	1.00636	2.18372	8.86702	0.0119233	0.0535826	5.80901	4.46884	6.60639	3.57452	2.00938
ENSG00000167377.18	ZNF23	7571	-0.404051	2.14298	2.1303	0.170959	0.323559	4.34714	3.44029	3.71268	4.76603	5.38362
ENSG00000182901.16	RGS7	6000	1.37008	2.18002	21.813	0.000592166	0.00929384	5.27043	5.78111	6.77018	2.38301	2.19894
ENSG00000237984.3	PTENP1	11191	0.107825	2.1718	0.12915	0.725772	0.830304	3.73162	4.1851	5.84201	3.95888	4.51163
ENSG00000240964.3	RN7SL751P	106479495	0.196693	2.1886	0.294585	0.597572	0.735899	3.57773	3.90137	6.82478	5.18882	3.07094
ENSG00000160201.11	U2AF1	7307	0.298043	2.2035	0.513675	0.487733	0.648588	4.77031	2.51815	7.58916	4.80446	3.18468
ENSG00000068745.15	IP6K2	51447	0.120113	7.47586	0.358221	0.561002	0.707524	174.732	149.919	226.91	165.658	172.579
ENSG00000188816.3	HMX2	3167	-0.861666	2.14142	9.79376	0.00903232	0.0450086	3.38538	2.80189	3.60348	6.07284	5.76275
ENSG00000126778.12	SIX1	6495	1.9606	2.1572	37.1659	6.20506e-05	0.00258866	6.30912	6.66779	5.78742	1.96022	1.25112
ENSG00000135424.17	ITGA7	3679	0.740834	2.16438	4.21583	0.06331	0.164644	7.15547	3.29843	5.35063	2.65206	3.63963
ENSG00000184486.10	POU3F2	5454	1.0889	2.16555	12.3618	0.00447028	0.0289503	4.77031	5.92298	6.1696	3.15173	2.12312
ENSG00000187994.14	RINL	126432	0.143633	2.12046	0.184838	0.675127	0.793287	3.84703	6.10032	3.2759	4.57385	3.45007
ENSG00000196511.14	TPK1	27010	-0.157764	2.13091	0.303163	0.592353	0.732287	4.88572	4.00777	3.38509	4.45854	4.70119
ENSG00000243479.3	MNX1-AS1	645249	0.100185	2.08821	0.0340924	0.856699	0.915763	2.11586	8.583	1.96554	3.65139	4.32206
ENSG00000243716.10	NPIPB5	23117	1.41828	2.18978	10.623	0.00712605	0.0385673	2.92374	7.02246	8.18974	1.72961	2.76764
ENSG00000267858.6	MZF1-AS1	100131691	-0.300571	2.12238	1.06524	0.323063	0.496014	4.07785	4.57524	3.0029	4.76603	4.85284
ENSG00000284753.1	EEF1AKMT4	9718	0.150844	2.13014	0.20209	0.661324	0.783275	6.34759	3.79496	3.2213	4.18949	3.86711
ENSG00000038382.20	TRIO	7204	-0.124252	7.45413	0.471681	0.505714	0.661851	150.573	169.816	187.217	202.21	166.589
ENSG00000091536.19	MYO15A	51168	0.279549	2.14639	1.05378	0.32557	0.498031	4.84725	4.5043	4.69545	3.95888	3.75337
ENSG00000134508.12	CABLES1	91768	-0.995048	2.12121	13.089	0.00371899	0.0260605	3.11609	3.26296	2.72991	6.5725	5.57319
ENSG00000105270.15	CLIP3	25999	0.534142	2.19368	1.58145	0.233282	0.399326	4.77031	3.22749	7.58916	4.9582	2.16103
ENSG00000108352.12	RAPGEFL1	51195	-0.0158927	2.12678	0.0031444	0.956236	0.975875	4.84725	4.36244	3.54889	4.15106	4.47371
ENSG00000162458.13	FBLIM1	54751	-0.410524	2.13439	1.87743	0.196563	0.356609	4.80878	2.94376	3.65808	4.8429	5.26988
ENSG00000126603.8	GLIS2	84662	-0.54602	2.14531	3.01456	0.108975	0.238112	3.73162	2.83736	4.47706	6.4572	4.24624
ENSG00000156253.7	RWDD2B	10069	0.371546	2.11945	1.33951	0.270398	0.440465	3.69315	6.34859	3.98567	3.45921	3.79128
ENSG00000179922.6	ZNF784	147808	-0.438041	2.13032	2.49585	0.141014	0.283562	4.03938	3.36936	3.87648	4.61228	5.57319
ENSG00000198074.10	AKR1B10	57016	1.69584	2.12705	19.3116	0.000946467	0.0119143	3.92397	8.72487	5.13224	1.65273	2.00938
ENSG00000092850.12	TEKT2	27285	-0.44376	2.1338	2.52373	0.139014	0.280894	3.38538	3.61763	4.31326	5.53474	4.70119
ENSG00000073921.18	PICALM	8301	0.29888	7.44924	3.19352	0.100066	0.224807	179.271	199.253	187.927	150.13	156.845
ENSG00000124772.12	CPNE5	57699	-0.113551	2.12701	0.135254	0.719669	0.825932	4.88572	3.47576	4.09487	5.45787	3.52589
ENSG00000117318.9	ID3	3399	-0.0211703	2.17634	0.00234696	0.962185	0.979327	4.15479	2.12802	7.15237	5.53474	3.45007
ENSG00000135363.12	LMO2	4005	2.20292	2.196	28.2453	0.000206297	0.00503558	5.53972	5.14271	9.2817	1.96022	0.909908
ENSG00000138496.16	PARP9	83666	1.19232	2.09682	10.9509	0.00650618	0.0364558	5.6936	7.12886	3.33049	2.57519	2.16103
ENSG00000166192.15	SENP8	123228	0.148914	2.08751	0.151102	0.704526	0.814542	4.15479	6.17125	2.56612	2.95955	4.85284
ENSG00000203706.8	SERTAD4-AS1	574036	0.135405	2.12554	0.246722	0.628672	0.759304	4.69337	4.22057	4.42246	4.07418	4.01876
ENSG00000253537.3	PCDHGA7	56108	-0.39087	2.10788	1.96398	0.187274	0.344353	3.57773	4.32697	3.33049	5.07351	4.77702
ENSG00000277203.1	F8A1	8263	0.291209	2.09964	0.756118	0.402182	0.573144	3.8855	6.31312	3.33049	4.03575	3.37424
ENSG00000070182.21	SPTB	6710	-0.308896	2.11576	1.14433	0.306495	0.478587	4.46255	3.40483	3.76728	4.15106	5.45945
ENSG00000239213.6	NCK1-DT	101927597	0.120813	2.10557	0.159935	0.696483	0.808414	5.23196	4.46884	3.33049	4.38167	3.63963
ENSG00000197601.13	FAR1	84188	0.414894	7.47049	5.25692	0.0414235	0.123335	191.697	173.327	225.982	146.863	148.618
ENSG00000260992.1	DOCK9-DT	100861541	-0.00767954	2.11848	0.000767003	0.978376	0.988961	4.80878	3.90137	4.04027	4.26636	4.28415
ENSG00000263006.6	ROCK1P1	727758	0.58728	2.11987	4.25422	0.0622847	0.162785	5.38584	4.96537	4.42246	2.99798	3.56381
ENSG00000089091.16	DZANK1	55184	0.360587	2.09795	1.30305	0.276676	0.447566	4.23173	6.02938	3.49429	3.38234	3.79128
ENSG00000089505.17	CMTM1	113540	-0.10556	2.08882	0.0757546	0.787977	0.872024	2.57751	6.41952	3.0575	4.22793	4.47371
ENSG00000163462.18	TRIM46	80128	0.376262	2.13582	1.66009	0.222699	0.387075	4.23173	4.57524	5.51442	4.15106	3.18468
ENSG00000205593.12	DENND6B	414918	-1.02249	2.10331	13.1744	0.00364093	0.0257586	2.92374	2.94376	3.0575	5.11195	6.97596
ENSG00000093072.18	ADA2	6871	0.551377	2.13652	2.64086	0.130989	0.270498	6.11677	3.44029	5.35063	4.07418	2.69181
ENSG00000166924.9	NYAP1	222950	0.916588	2.14601	8.16619	0.0148554	0.0621625	6.15524	3.90137	6.115	3.19016	2.50225
ENSG00000177839.7	PCDHB9	56127	-0.65099	2.11504	4.50952	0.055955	0.151442	2.8468	3.51123	4.04027	6.5725	4.28415
ENSG00000226869.6	LHFPL3-AS1	645591	0.356802	2.12352	1.26823	0.282861	0.45402	6.11677	3.44029	4.53166	3.7667	3.56381
ENSG00000175216.15	CKAP5	9793	-0.0342885	9.63046	0.0277287	0.870616	0.923813	773.368	653.691	927.952	869.377	738.315
ENSG00000176619.13	LMNB2	84823	-1.21144	7.42671	48.3832	1.82427e-05	0.00128841	103.331	107.217	127.487	247.142	274.603
ENSG00000006016.11	CRLF1	9244	-2.05471	2.0972	32.4205	0.00011395	0.003616	2.19281	0.993075	2.40232	8.26367	7.05179
ENSG00000067601.8	PMS2P4	5382	0.608934	2.12579	4.77279	0.050224	0.140469	5.19349	4.57524	5.18683	3.34391	3.18468
ENSG00000111432.4	FZD10	11211	-0.801631	2.11701	6.90763	0.0225888	0.0817308	3.46232	2.37629	4.04027	6.11128	5.3078
ENSG00000142227.11	EMP3	2014	-0.425486	2.12661	1.99753	0.183826	0.340491	3.42385	3.08563	4.85924	5.4963	4.62537
ENSG00000144791.10	LIMD1	8994	-0.759771	2.09172	6.70628	0.0242329	0.0858927	3.69315	3.33389	2.72991	4.65072	6.40727
ENSG00000165028.12	NIPSNAP3B	55335	0.0561364	2.11677	0.0395579	0.845791	0.909522	4.80878	3.6531	4.53166	4.07418	4.24624
ENSG00000165475.15	CRYL1	51084	0.304593	2.09258	0.607976	0.451168	0.616261	7.23241	3.44029	2.83911	3.68983	3.63963
ENSG00000272645.3	GTF2IP20	441124	0.178169	2.094	0.296689	0.596282	0.734815	4.96266	4.82351	3.33049	4.8429	2.91929
ENSG00000143375.15	CGN	57530	0.339644	2.0993	1.20713	0.294184	0.46513	3.65468	5.88751	4.20407	3.88201	3.37424
ENSG00000158050.5	DUSP2	1844	-1.61357	2.09893	17.815	0.00127787	0.0139044	1.30799	2.16348	3.49429	8.37898	5.64901
ENSG00000146085.8	MMUT	4594	0.525334	7.4791	6.63368	0.0248603	0.0873297	204.816	159.708	245.037	137.83	144.448
ENSG00000161149.12	TUBA3FP	113691	0.178761	2.09752	0.397855	0.540428	0.690261	3.96244	5.03631	4.20407	3.65139	4.1325
ENSG00000234056.2	LINC00463	101928922	-0.847063	2.06786	6.15252	0.0295466	0.0974868	4.03938	3.33389	1.85634	4.91977	6.25562
ENSG00000152527.14	PLEKHH2	130271	1.89889	2.16365	22.9689	0.000482719	0.00829454	7.30935	3.47576	8.13514	1.69117	1.66816
ENSG00000256274.1	TAS2R64P	338412	0.491523	2.11715	2.34265	0.152681	0.299693	5.57819	3.68856	5.24143	2.72893	4.1325
ENSG00000110675.13	ELMOD1	55531	1.36764	2.11812	21.4947	0.000627265	0.00950434	6.23218	5.00084	5.78742	2.07553	2.31268
ENSG00000166578.10	IQCD	115811	-0.31671	2.08498	0.81675	0.384517	0.556414	2.26975	5.24911	3.82188	4.88133	4.54954
ENSG00000167182.15	SP2	6668	0.0662943	2.10363	0.0529515	0.822013	0.894027	3.50079	4.6107	4.80465	4.3048	3.90502
ENSG00000169499.15	PLEKHA2	59339	0.0440358	2.1272	0.0181209	0.895225	0.938161	3.2315	3.79496	6.115	4.3048	4.1325
ENSG00000025423.11	HSD17B6	8630	0.479166	2.07494	2.34119	0.152797	0.299828	4.6549	5.81658	3.43969	3.53608	3.14677
ENSG00000236200.6	KDM4A-AS1	100132774	0.0166521	2.07805	0.00260295	0.960178	0.978273	4.03938	5.00084	3.38509	5.18882	3.03303
ENSG00000125991.19	ERGIC3	51614	-0.6089	7.43455	13.4814	0.00337576	0.0245471	146.726	131.653	150.309	221.543	214.283
ENSG00000107902.14	LHPP	64077	-0.0457251	2.10108	0.0255472	0.875761	0.926676	3.53926	4.11417	4.85924	4.03575	4.54954
ENSG00000233476.3	EEF1A1P6	221838	-1.13597	2.08984	13.5225	0.00334205	0.0244022	2.96221	1.98615	3.54889	6.26502	6.10397
ENSG00000129028.9	THAP10	56906	0.912232	2.09596	8.01012	0.0156203	0.0641367	6.84771	4.0787	4.58625	2.6905	2.80555
ENSG00000145244.12	CORIN	10699	0.427514	2.11316	1.75495	0.210762	0.37305	5.11655	3.5467	5.62362	2.84424	4.20832
ENSG00000165886.5	UBTD1	80019	-0.5199	2.09486	2.62221	0.132227	0.272366	4.30867	2.34082	4.09487	5.26569	4.96658
ENSG00000278023.6	RDM1	201299	-1.20898	2.06202	18.2174	0.00117693	0.0132567	2.92374	2.87282	2.18393	6.4572	5.9144
ENSG00000260233.3	ZNRD2-AS1	254100	-0.267443	2.10871	0.662285	0.432144	0.599628	4.00091	2.58909	5.24143	4.61228	4.81493
ENSG00000035664.11	DAPK2	23604	-0.441628	2.07996	2.48455	0.141835	0.284766	3.19303	3.7595	3.93107	4.49698	5.34571
ENSG00000162341.18	TPCN2	219931	-0.583986	2.04449	2.71085	0.12647	0.264146	3.38538	4.68164	1.91094	5.18882	4.89076
ENSG00000170469.10	SPATA24	202051	-0.314898	2.07377	1.31643	0.274348	0.444985	3.57773	4.0787	3.60348	4.49698	4.85284
ENSG00000141425.18	RPRD1A	55197	0.137414	7.45126	0.634095	0.441851	0.608036	182.349	166.375	195.899	155.396	174.664
ENSG00000237424.1	FOXD2-AS1	84793	0.0729986	2.08927	0.0566852	0.815968	0.890467	4.84725	3.58216	4.36786	4.88133	3.22259
ENSG00000132688.11	NES	10763	0.245165	2.04981	0.433933	0.522927	0.676201	3.50079	6.49045	2.89371	4.18949	3.10885
ENSG00000226415.1	TPI1P1	729708	-0.927904	2.07184	7.53685	0.0182432	0.0714083	1.84657	3.68856	3.54889	6.38033	5.11823
ENSG00000119574.13	ZBTB45	84878	-1.15754	2.0554	16.2461	0.00178234	0.0171992	2.30822	3.26296	2.56612	6.30345	5.83858
ENSG00000187715.13	KBTBD12	166348	-0.349233	2.03442	0.798904	0.389591	0.5614	4.07785	4.92991	1.69255	4.22793	4.96658
ENSG00000250387.3	LINC02197	102724392	-0.550588	2.0904	3.05028	0.107121	0.235322	3.57773	2.51815	4.53166	5.65005	4.66328
ENSG00000258057.6	BCDIN3D-AS1	100286844	0.371017	2.05252	1.28051	0.280657	0.451503	4.84725	5.53285	2.94831	3.61296	3.29842
ENSG00000166262.16	FAM227B	196951	0.197322	2.0547	0.381621	0.548674	0.696875	5.38584	4.46884	2.94831	3.80513	3.67754
ENSG00000187091.13	PLCD1	5333	0.251073	2.10559	0.468121	0.507292	0.662986	5.50125	2.51815	5.62362	4.18949	3.41216
ENSG00000141933.9	TPGS1	91978	-1.49638	2.06433	23.9892	0.000405423	0.00748221	2.30822	1.77335	3.0575	6.80312	6.52101
ENSG00000118058.22	KMT2A	4297	0.0732853	7.44881	0.113668	0.742028	0.841951	179.964	165.205	189.347	211.473	127.198
ENSG00000182732.18	RGS6	9628	0.0642363	2.10666	0.0372174	0.85036	0.912086	3.92397	3.05016	6.06041	4.3048	3.94293
ENSG00000163521.16	GLB1L	79411	-0.31458	2.03302	0.688652	0.423374	0.592103	4.11632	4.64617	2.07473	3.30547	5.76275
ENSG00000175764.14	TTLL11	158135	-0.408168	2.05485	2.10818	0.173021	0.32634	3.69315	3.90137	3.1667	5.18882	4.35998
ENSG00000014914.21	MTMR11	10903	0.775798	2.09217	6.93636	0.0223653	0.0812662	5.0396	4.32697	5.78742	3.19016	2.69181
ENSG00000198915.11	RASGEF1A	221002	2.05298	2.09052	46.0472	2.30623e-05	0.00146707	5.80901	6.13578	6.1696	1.53743	1.36486
ENSG00000206052.11	DOK6	220164	1.5052	2.13293	9.66704	0.00937415	0.0461606	7.73252	2.19895	7.75295	2.11396	2.00938
ENSG00000250107.1	CACNA1G-AS1	253962	0.00112817	2.03495	1.12129e-05	0.997385	0.998678	4.03938	5.39098	2.51152	4.03575	3.98085
ENSG00000262209.3	PCDHGB3	56102	-0.544484	2.03827	2.29466	0.156585	0.304629	2.8468	4.75257	2.51152	6.26502	3.63963
ENSG00000236778.8	INTS6-AS1	100507398	0.828652	2.06473	7.75188	0.0169914	0.0679164	4.57796	5.71018	4.64085	2.45988	3.14677
ENSG00000089723.10	OTUB2	78990	-0.448238	2.02894	2.0044	0.183131	0.339589	3.50079	4.46884	2.40232	4.80446	4.70119
ENSG00000164109.14	MAD2L1	4085	0.174306	7.47566	0.472477	0.505362	0.661587	200.584	121.439	237.339	148.861	181.489
ENSG00000154102.11	C16orf74	404550	-1.44525	2.04305	23.4972	0.000440719	0.00786672	2.50057	1.98615	2.67531	5.41943	7.54465
ENSG00000197506.8	SLC28A3	64078	-0.671548	2.04716	5.27308	0.0411634	0.123086	3.84703	2.83736	3.1121	4.53541	5.87649
ENSG00000220848.5	RPS18P9	645958	0.116276	2.06454	0.140397	0.714647	0.822078	5.00113	3.15656	4.58625	3.45921	4.35998
ENSG00000257126.6	FOXG1-AS1	103695363	0.243777	2.04443	0.676274	0.427455	0.595674	4.00091	5.03631	3.87648	3.15173	4.1325
ENSG00000280832.1	GSEC	399972	-0.471059	2.04005	2.53963	0.137889	0.279438	4.07785	3.29843	3.0575	5.57318	4.09459
ENSG00000285230.2	RALY-AS1	101926888	0.146343	2.05628	0.262912	0.61775	0.751412	4.84725	3.68856	4.20407	3.68983	3.98085
ENSG00000125878.6	TCF15	6939	-0.573153	2.04311	2.59673	0.133942	0.274604	1.92351	4.2915	3.93107	5.57318	4.47371
ENSG00000137460.8	FHDC1	85462	0.343315	2.04675	1.50476	0.244258	0.411447	4.50102	4.57524	4.20407	3.26703	3.71546
ENSG00000139160.13	ETFBKMT	254013	0.143476	2.02097	0.18883	0.671866	0.791269	4.34714	5.17818	2.78451	3.26703	4.20832
ENSG00000144045.14	DQX1	165545	1.59038	2.05592	27.5789	0.000228148	0.00537811	6.27065	5.49738	4.96844	1.96022	1.74399
ENSG00000178252.18	WDR6	11180	-0.672003	7.41911	16.4715	0.00169706	0.0166623	145.225	140.414	129.07	211.819	228.728
ENSG00000160602.14	NEK8	284086	-0.382785	2.02694	1.71702	0.215431	0.378291	3.53926	4.1851	2.89371	4.3048	4.96658
ENSG00000172059.11	KLF11	8462	-0.498064	2.0407	2.93813	0.113079	0.244194	4.07785	2.90829	3.38509	4.45854	5.3078
ENSG00000236824.2	BCYRN1	618	-0.0206786	2.04675	0.00413431	0.949827	0.972312	5.38584	2.97922	3.71268	4.34323	3.8292
ENSG00000131944.10	FAAP24	91442	-0.126925	2.03056	0.165857	0.691235	0.80452	4.80878	3.61763	3.1121	3.53608	4.89076
ENSG00000159915.12	ZNF233	7767	-0.176499	2.01652	0.25474	0.623208	0.755785	3.03915	5.39098	2.78451	3.57452	4.92867
ENSG00000196436.8	NPIPB15	440348	0.467696	2.0324	1.59411	0.231533	0.397462	6.69383	3.61763	3.1667	2.72893	3.79128
ENSG00000228393.4	LINC01004	100216546	0.134034	2.04867	0.203428	0.660283	0.78274	5.07808	3.40483	4.14947	3.65139	4.01876
ENSG00000260691.6	ANKRD20A1	84210	1.39445	2.08752	18.7964	0.00104766	0.0125628	5.15502	4.71711	6.93398	2.42145	1.81982
ENSG00000155846.17	PPARGC1B	133522	1.27667	2.06298	11.2015	0.00607519	0.0349816	4.61643	5.60378	5.95121	3.15173	1.28904
ENSG00000171443.7	ZNF524	147807	-0.944046	2.0216	11.0375	0.00635337	0.0360186	3.42385	2.62455	2.62072	5.65005	5.49736
ENSG00000144674.16	GOLGA4	2803	1.11534	7.47134	34.5535	8.60214e-05	0.00305572	244.055	188.152	246.129	106.121	102.592
ENSG00000198816.7	ZNF358	140467	-1.05184	1.99737	8.11375	0.0151073	0.0628357	2.92374	3.72403	1.41955	6.30345	5.00449
ENSG00000132005.9	RFX1	5989	-0.883294	2.02826	10.1265	0.00820273	0.0422235	3.03915	2.69549	3.2213	5.80379	5.19406
ENSG00000174032.17	SLC25A30	253512	0.554739	2.04051	3.52709	0.0857334	0.202578	4.50102	4.85897	4.53166	3.68983	2.61599
ENSG00000180071.20	ANKRD18A	253650	2.33935	2.08875	39.104	4.92558e-05	0.00224008	7.42476	3.9723	7.26157	1.19151	1.25112
ENSG00000242516.2	LINC00960	401074	-0.395898	2.03065	2.01807	0.181756	0.337773	3.80856	3.29843	3.54889	4.3048	5.04241
ENSG00000254876.5	SUGT1P4-STRA6LP	100499484	0.166265	2.02131	0.300173	0.594161	0.733561	4.77031	4.43337	3.2213	4.11262	3.29842
ENSG00000197019.5	SERTAD1	29950	-0.0623349	2.06042	0.0271241	0.87202	0.924708	4.77031	2.19895	5.18683	4.9582	3.45007
ENSG00000105404.11	RABAC1	10567	-0.32333	2.05087	0.87485	0.368681	0.541974	4.11632	2.23442	4.80465	4.99664	4.24624
ENSG00000105755.8	ETHE1	23474	-0.794712	2.02806	7.50616	0.0184306	0.0717663	2.96221	2.76642	3.54889	6.07284	4.62537
ENSG00000225163.4	LINC00618	145249	-1.37921	2.00897	23.6857	0.000426785	0.00770231	2.42363	2.44722	2.29313	7.03373	5.42154
ENSG00000112339.15	HBS1L	10767	0.0215089	7.45086	0.0149256	0.904855	0.944969	168.577	159.424	199.83	168.81	177.811
ENSG00000179588.9	ZFPM1	161882	-0.595143	2.01126	4.4235	0.0579968	0.155238	3.61621	3.33389	2.83911	5.30413	4.58745
ENSG00000196376.11	SLC35F1	222553	1.32626	2.04903	20.6883	0.000727701	0.0103441	5.42431	5.07177	5.62362	2.22927	2.04729
ENSG00000261787.2	TCF24	100129654	-0.993485	2.03809	7.36033	0.0193533	0.0739308	3.11609	1.56055	4.04027	5.65005	5.80066
ENSG00000218891.5	ZNF579	163033	-0.51462	2.02746	2.58743	0.134576	0.275462	4.23173	2.30535	3.71268	5.07351	4.66328
ENSG00000259673.6	IQCH-AS1	100506686	0.154051	1.9786	0.133122	0.721782	0.827404	4.23173	5.92298	1.74714	3.34391	3.86711
ENSG00000153208.17	MERTK	10461	2.88904	2.07891	55.0979	9.76167e-06	0.000870642	7.04006	4.57524	7.64376	1.0762	0.644518
ENSG00000111671.9	SPSB2	84727	-0.729833	2.00192	6.20051	0.0290344	0.0964119	3.30844	3.22749	2.72991	5.99597	4.28415
ENSG00000113790.11	EHHADH	1962	-0.0222472	1.98082	0.00356584	0.953399	0.974088	3.92397	5.39098	2.07473	3.80513	3.98085
ENSG00000001460.18	STPG1	90529	-0.137181	1.97668	0.131674	0.723228	0.828585	3.92397	5.14271	1.91094	4.26636	3.86711
ENSG00000205363.5	INSYN1	388135	-0.781659	2.00662	6.35716	0.0274348	0.0929116	3.80856	2.34082	3.0029	4.57385	5.9144
ENSG00000087095.13	NLK	2821	0.0355942	7.42473	0.0383253	0.848179	0.91067	157.805	203.545	158.881	167.349	171.063
ENSG00000105438.9	KDELR1	10945	-0.401355	2.01581	1.68474	0.219513	0.383209	4.23173	2.55362	3.76728	4.3048	4.96658
ENSG00000115641.19	FHL2	2274	-0.13541	2.04346	0.147503	0.70788	0.817055	3.96244	2.41175	5.40523	4.72759	3.8292
ENSG00000156875.14	MFSD14A	64645	0.120065	2.05907	0.0967856	0.761242	0.855151	3.96244	2.48269	6.388	4.53541	3.2605
ENSG00000158427.15	TMSB15B	11013	-0.0263459	2.01617	0.00795911	0.930434	0.960581	4.69337	3.19203	3.93107	4.15106	3.86711
ENSG00000284194.2	SCO2	9997	-0.899789	2.01026	9.41137	0.0101115	0.0485261	3.11609	2.30535	3.38509	5.18882	5.72484
ENSG00000007372.23	PAX6	5080	2.40433	2.11668	23.4723	0.000442599	0.00788459	6.19371	2.87282	10.2645	1.30681	1.09947
ENSG00000099814.16	CEP170B	283638	0.0870305	2.03321	0.043755	0.837939	0.904323	5.80901	1.84428	4.75005	3.92044	3.8292
ENSG00000135205.15	CCDC146	57639	0.374517	2.00464	1.714	0.215809	0.378784	4.69337	4.5043	3.76728	3.30547	3.37424
ENSG00000140090.17	SLC24A4	123041	-0.218794	2.00007	0.600306	0.453966	0.618491	3.53926	4.0787	3.38509	4.57385	3.98085
ENSG00000148926.10	ADM	133	0.661284	2.07983	2.02282	0.181281	0.3371	5.15502	1.98615	7.69835	3.49765	2.69181
ENSG00000161016.17	RPL8	6132	-0.262408	9.61349	1.81243	0.203937	0.366063	699.159	627.659	849.385	880.716	859.408
ENSG00000067704.10	IARS2	55699	-0.201935	7.41256	1.3044	0.27644	0.447366	169.077	175.278	137.478	182.531	187.024
ENSG00000175793.12	SFN	2810	-0.407688	2.00732	2.1601	0.168231	0.320542	3.19303	3.5467	3.71268	4.45854	4.77702
ENSG00000225973.4	PIGBOS1	101928527	0.0128355	1.98503	0.00151692	0.969594	0.983798	3.96244	4.89444	2.72991	3.2286	4.47371
ENSG00000181481.14	RNF135	84282	-0.159998	1.99461	0.309675	0.588455	0.729227	4.03938	3.93683	3.1667	4.49698	3.8292
ENSG00000183248.12	PRR36	80164	-1.07019	2.00557	8.13556	0.0150019	0.0625278	3.03915	1.95068	3.2213	7.87932	3.56381
ENSG00000234219.1	CDCA4P4	100188945	-0.478322	2.03258	1.88784	0.195415	0.355018	3.15456	2.26989	5.07764	4.76603	4.89076
ENSG00000111859.17	NEDD9	4739	1.12029	2.00435	10.9622	0.00648604	0.0363831	3.73162	6.63232	4.69545	2.53676	2.08521
ENSG00000121361.5	KCNJ8	3764	1.47404	2.01919	24.9617	0.000344948	0.006857	5.15502	5.63925	5.29603	1.99866	1.85773
ENSG00000149150.9	SLC43A1	8501	-1.16646	2.01582	9.64229	0.00944269	0.0463835	2.57751	1.45415	3.98567	6.22658	5.6111
ENSG00000172014.12	ANKRD20A4	728747	0.916303	2.03445	8.4835	0.0134328	0.0581636	5.00113	4.11417	5.84201	2.19083	3.07094
ENSG00000244558.6	KCNK15-AS1	106144538	-0.164344	2.00949	0.342321	0.5697	0.713925	3.8855	3.33389	4.09487	4.3048	4.1325
ENSG00000075711.21	DLG1	1739	-0.0088953	7.41312	0.0021469	0.963832	0.980335	155.574	207.127	147.033	171.385	170.608
ENSG00000162997.15	PRORSD1P	344405	1.37064	1.99445	16.9103	0.00154445	0.0157152	6.00136	5.56831	3.93107	1.65273	2.3506
ENSG00000256628.3	ZBTB11-AS1	100009676	-0.33612	1.97942	1.17595	0.300208	0.47162	3.46232	4.22057	2.72991	3.72826	5.08032
ENSG00000143590.14	EFNA3	1944	0.614813	2.03491	1.94334	0.189437	0.347049	2.26975	5.32004	6.55179	3.99731	2.12312
ENSG00000150054.18	MPP7	8208	-0.348676	1.99092	1.32306	0.273207	0.443736	2.65445	4.25603	3.60348	4.34323	4.58745
ENSG00000178093.14	TSSK6	83983	-0.909032	1.98117	7.97824	0.0157823	0.064639	3.80856	2.26989	2.45692	4.61228	6.10397
ENSG00000181798.3	LINC00471	151477	0.211317	2.00218	0.533401	0.479672	0.641434	4.80878	3.61763	4.04027	3.68983	3.48798
ENSG00000198892.6	SHISA4	149345	0.012641	2.00396	0.00205015	0.964655	0.980451	3.96244	3.68856	4.20407	3.7667	4.05667
ENSG00000230327.1	MTCO1P42	107075283	0.355317	1.99928	1.33128	0.271798	0.442261	3.2315	5.03631	4.64085	3.49765	3.22259
ENSG00000259706.1	HSP90B2P	7190	1.29817	2.0272	15.0467	0.00233071	0.0199764	5.50125	4.2915	6.06041	2.65206	1.63025
ENSG00000265148.6	TSPOAP1-AS1	100506779	0.216593	1.97698	0.510724	0.48896	0.649689	3.73162	5.03631	3.43969	3.7667	3.2605
ENSG00000112992.18	NNT	23530	0.0714683	7.44296	0.161653	0.694949	0.807428	188.273	151.976	191.858	171.154	166.399
ENSG00000110799.13	VWF	7450	0.153097	1.98801	0.295463	0.597033	0.735639	4.00091	4.11417	4.04027	3.34391	3.94293
ENSG00000212125.2	TAS2R15P	266657	-0.463964	1.97869	2.79344	0.121386	0.256213	3.42385	3.33389	3.2759	4.3048	4.92867
ENSG00000246095.2	LINC01096	285548	2.01311	1.98577	22.9992	0.000480187	0.00827481	4.11632	7.69633	4.85924	1.88335	0.871995
ENSG00000278619.5	MRM1	79922	-0.197149	1.96713	0.396688	0.541013	0.690715	4.53949	3.61763	2.62072	3.95888	4.32206
ENSG00000105371.10	ICAM4	3386	-1.10231	1.95734	12.6046	0.00420102	0.028026	3.26997	2.55362	1.91094	6.0344	5.11823
ENSG00000143507.18	DUSP10	11221	1.38271	2.09366	5.27268	0.0411697	0.123086	5.73207	1.41868	9.93688	1.88335	2.42642
ENSG00000147804.9	SLC39A4	55630	-0.347297	1.97994	1.45828	0.251252	0.418691	2.92374	3.8659	3.65808	4.65072	4.20832
ENSG00000176894.10	PXMP2	5827	-0.852683	1.97043	8.90297	0.0117924	0.0532191	2.50057	3.22749	2.94831	4.8429	5.6111
ENSG00000185250.16	PPIL6	285755	-0.229802	1.97327	0.601219	0.453632	0.618085	4.07785	3.51123	3.1667	3.57452	4.85284
ENSG00000162998.5	FRZB	2487	1.49681	2.00917	15.3955	0.00215297	0.0190739	7.04006	3.61763	5.40523	2.38301	1.40277
ENSG00000149428.19	HYOU1	10525	-0.0011843	7.44242	4.37955e-05	0.994832	0.997088	183.388	147.684	190.384	174.652	173.224
ENSG00000163703.18	CRELD1	78987	0.157962	1.97047	0.274397	0.61026	0.745746	4.96266	3.68856	3.33049	3.65139	3.52589
ENSG00000168476.12	REEP4	80346	-0.645931	1.96438	5.35734	0.0398378	0.120271	3.38538	3.08563	2.83911	4.9582	4.77702
ENSG00000237515.9	SHISA9	729993	-2.25171	1.95129	45.1834	2.52128e-05	0.00154095	1.0387	1.77335	1.69255	8.49429	5.80066
ENSG00000158483.16	FAM86C1	55199	-0.336414	1.93814	0.788465	0.392606	0.563974	2.73139	5.24911	2.07473	4.18949	4.35998
ENSG00000200312.1	RN7SKP255	106479209	-0.691227	1.97084	5.08515	0.0443158	0.129181	3.69315	2.37629	3.1667	5.57318	4.35998
ENSG00000204152.11	TIMM23B	100652748	-0.212796	1.9817	0.500772	0.493135	0.652482	4.11632	2.83736	3.98567	3.84357	4.58745
ENSG00000207493.1	SNORA46	677827	-2.84556	1.95106	65.8571	4.05154e-06	0.000568843	0.884816	0.780273	1.63795	7.87932	7.62048
ENSG00000147117.7	ZNF157	7712	-0.319946	1.9522	1.01308	0.334703	0.507761	2.76986	4.6107	2.89371	4.4201	4.17041
ENSG00000154710.17	RABGEF1	27342	0.0198675	1.97944	0.00367232	0.95271	0.973605	4.92419	2.76642	3.98567	3.30547	4.35998
ENSG00000162976.13	SLC66A3	130814	-0.106182	1.95861	0.133159	0.721746	0.827404	3.77009	4.14963	3.1121	4.26636	3.67754
ENSG00000168348.4	INSM2	84684	-0.616582	7.41339	13.7215	0.0031842	0.023847	142.032	145.131	134.093	229.538	201.09
ENSG00000180592.17	SKIDA1	387640	-0.206354	1.96815	0.535428	0.478857	0.640727	3.38538	3.83043	3.60348	4.49698	3.8292
ENSG00000204316.12	MRPL38	64978	-0.229792	1.97437	0.472075	0.50554	0.66172	4.80878	2.44722	3.54889	4.61228	3.8292
ENSG00000232434.2	AJM1	389813	-0.376592	1.98975	1.06214	0.32374	0.496543	3.26997	2.69549	4.53166	6.07284	2.9572
ENSG00000258704.6	SRP54-AS1	100506157	0.34688	1.9922	1.31662	0.274316	0.444985	4.42408	3.36936	5.07764	3.45921	3.2605
ENSG00000272989.1	LINC02012	100129516	-0.959221	1.92135	5.14622	0.0432604	0.12706	2.50057	4.25603	1.14656	5.26569	5.15615
ENSG00000172602.11	RND1	27289	0.367868	1.9897	1.10701	0.31416	0.486676	5.42431	2.62455	4.85924	3.45921	3.18468
ENSG00000183048.12	SLC25A10	1468	-1.36689	1.93134	17.9247	0.00124938	0.0137536	2.23128	2.94376	1.58335	5.26569	6.48309
ENSG00000269386.5	RAB11B-AS1	100507567	-0.206487	1.95461	0.503387	0.492032	0.651817	3.19303	4.22057	3.2759	3.92044	4.32206
ENSG00000171357.6	LURAP1	541468	-0.245924	1.96454	0.775368	0.39644	0.567696	3.61621	3.29843	3.76728	4.11262	4.32206
ENSG00000231167.3	YBX1P2	646531	0.296124	1.98414	0.792335	0.391484	0.563178	2.80833	4.53977	5.29603	3.65139	3.18468
ENSG00000077235.18	GTF3C1	2975	-0.0864053	7.42469	0.278791	0.607448	0.743626	173.424	165.17	164.177	174.69	181.185
ENSG00000274180.1	NATD1	256302	-0.861236	1.95762	8.34283	0.0140426	0.0598076	2.30822	3.01469	3.2759	5.80379	4.58745
ENSG00000012779.11	ALOX5	240	2.53838	1.99809	43.1188	3.13802e-05	0.00173091	7.80946	3.90137	6.00581	0.960892	1.06156
ENSG00000006837.12	CDKL3	51265	1.16807	1.98784	14.3653	0.00273039	0.0219742	5.34737	4.0787	5.67822	2.11396	2.3506
ENSG00000101198.15	NKAIN4	128414	1.75987	1.95794	25.5731	0.000312351	0.00646683	6.77077	5.03631	4.09487	1.80648	1.32695
ENSG00000133056.13	PIK3C2B	5287	-0.49592	1.97371	2.27295	0.158393	0.306942	2.73139	2.62455	4.64085	5.07351	4.24624
ENSG00000136378.15	ADAMTS7	11173	0.977899	1.97684	6.93809	0.0223519	0.0812504	6.50148	3.12109	4.85924	2.92111	1.97147
ENSG00000070404.10	FSTL3	10272	-0.410562	1.91247	1.1966	0.2962	0.467506	3.69315	4.2915	1.63795	4.34323	4.28415
ENSG00000127415.13	IDUA	3425	-0.444451	1.95371	2.36757	0.150702	0.296885	3.46232	2.83736	3.65808	4.88133	4.1325
ENSG00000158792.16	SPATA2L	124044	-1.56643	1.93653	21.5514	0.000620842	0.0094947	2.73139	1.31228	2.23853	6.4572	5.9144
ENSG00000162999.13	DUSP19	142679	0.307219	1.92255	0.753693	0.402914	0.573861	4.61643	4.92991	2.40232	2.88268	3.60172
ENSG00000099797.15	TECR	9524	-0.6613	7.42203	14.7652	0.00248689	0.0206826	125.644	138.534	153.039	231.767	208.066
ENSG00000166669.13	ATF7IP2	80063	-2.93632	1.89712	25.3093	0.000325949	0.00658334	0.423173	2.12802	0.272991	6.64938	8.49247
ENSG00000196562.14	SULF2	55959	0.259558	1.9477	0.829984	0.380821	0.552716	4.30867	4.14963	3.65808	3.45921	3.29842
ENSG00000260924.2	LINC01311	100652736	0.0189101	1.94426	0.00394209	0.951006	0.972584	4.19326	3.7595	3.38509	3.07486	4.39789
ENSG00000105650.22	PDE4C	5143	0.499892	1.94303	2.87093	0.116846	0.249371	4.30867	4.75257	3.71268	3.26703	2.76764
ENSG00000106327.13	TFR2	7036	-0.0399162	1.9468	0.0203019	0.889142	0.934516	3.61621	3.8659	3.71268	3.99731	3.67754
ENSG00000166105.16	GLB1L3	112937	1.51129	1.96173	22.0649	0.000566018	0.00909906	6.38606	4.43337	4.69545	1.69117	1.93355
ENSG00000174021.11	GNG5	2787	-0.437024	1.98946	1.066	0.322898	0.495846	3.03915	1.66695	5.67822	4.53541	4.70119
ENSG00000100478.15	AP4S1	11154	-0.243681	1.927	0.593428	0.4565	0.620626	3.61621	3.93683	2.78451	3.2286	4.96658
ENSG00000173193.15	PARP14	54625	0.193802	1.93123	0.356027	0.562186	0.708221	3.07762	5.28458	3.38509	3.38234	3.48798
ENSG00000213917.2	RPL5P8	100130523	-0.268709	1.92927	0.797286	0.390056	0.56189	3.53926	3.90137	2.83911	4.72759	3.56381
ENSG00000164111.15	ANXA5	308	0.109823	7.45331	0.321045	0.581779	0.723904	163.268	157.296	220.959	164.197	170.267
ENSG00000133460.19	SLC2A11	66035	0.319081	1.92968	1.08867	0.318024	0.491029	3.84703	4.92991	3.33049	3.49765	2.99511
ENSG00000167363.14	FN3K	64122	0.0383695	1.94973	0.0171675	0.898001	0.940252	3.69315	3.6531	4.14947	4.26636	3.18468
ENSG00000203865.10	ATP1A1-AS1	84852	-0.111999	1.91497	0.108551	0.747673	0.845628	3.11609	5.00084	2.51152	3.99731	3.71546
ENSG00000101470.10	TNNC2	7125	1.11184	1.94871	14.4686	0.00266492	0.0216912	5.0396	4.85897	4.58625	2.22927	2.23686
ENSG00000106330.12	MOSPD3	64598	-0.709131	1.95085	4.42002	0.0580811	0.155348	3.19303	1.98615	3.93107	5.57318	4.28415
ENSG00000130775.16	THEMIS2	9473	0.00938398	1.91997	0.000872238	0.976941	0.988011	4.57796	3.8659	2.62072	3.80513	3.56381
ENSG00000150455.13	TIRAP	114609	-0.0765172	1.89926	0.036476	0.851838	0.912851	3.73162	5.03631	1.80174	3.03642	4.47371
ENSG00000174348.14	PODN	127435	-0.0262688	1.89987	0.00411284	0.949958	0.972312	2.80833	5.85205	2.07473	3.30547	4.05667
ENSG00000275895.7	U2AF1L5	102724594	-0.0721071	1.97921	0.0342827	0.856305	0.915559	3.57773	2.09255	5.84201	4.03575	3.94293
ENSG00000136052.9	SLC41A2	84102	2.8141	1.95187	57.9662	7.61917e-06	0.000776592	7.57864	4.78804	5.02304	0.884021	0.758257
ENSG00000056586.16	RC3H2	54542	0.294948	7.43087	3.09473	0.104867	0.231877	197.199	180.385	181.157	146.286	157.338
ENSG00000155324.10	GRAMD2B	65983	0.0940107	1.90866	0.0705456	0.795206	0.876833	3.38538	5.10724	2.72991	2.72893	4.32206
ENSG00000166046.11	TCP11L2	255394	0.279282	1.95151	0.755395	0.4024	0.573341	3.8855	3.6531	4.75005	4.18949	2.54016
ENSG00000231473.3	RB1-DT	100862704	-0.227474	1.91268	0.508873	0.489732	0.650185	3.96244	3.79496	2.51152	4.65072	3.41216
ENSG00000124225.16	PMEPA1	56937	-0.976509	1.90838	11.3125	0.00589522	0.0343916	2.50057	3.08563	2.29313	5.45787	4.92867
ENSG00000135439.11	AGAP2	116986	0.647031	1.95616	3.94948	0.0710173	0.177897	5.07808	3.26296	5.07764	3.2286	2.46433
ENSG00000164591.13	MYOZ3	91977	0.798178	1.90612	5.16651	0.0429165	0.126341	4.19326	6.02938	2.94831	2.57519	2.50225
ENSG00000247271.7	ZBED5-AS1	729013	-0.166972	1.9126	0.260636	0.619259	0.752533	3.96244	3.83043	2.67531	4.8429	3.03303
ENSG00000176681.14	LRRC37A	9884	0.681383	1.92421	5.34893	0.0399677	0.120501	4.73184	4.6107	3.76728	2.76737	2.69181
ENSG00000179846.9	NKPD1	284353	-0.634229	1.91214	4.20849	0.0635084	0.165017	2.4621	3.6531	2.89371	3.95888	5.38362
ENSG00000267060.5	PTGES3L	100885848	0.323657	1.9223	1.25231	0.285751	0.45683	4.15479	4.32697	3.60348	3.03642	3.41216
ENSG00000074657.13	ZNF532	55205	-0.177302	7.42282	1.03294	0.330201	0.503226	144.841	176.98	167.125	195.023	173.565
ENSG00000126903.16	SLC10A3	8273	-0.319111	1.91935	1.27268	0.282058	0.453229	3.69315	3.12109	3.2759	4.07418	4.32206
ENSG00000089847.12	ANKRD24	170961	0.113445	1.89225	0.106923	0.7495	0.846734	4.34714	4.53977	2.23853	3.53608	3.37424
ENSG00000170959.14	DCDC1	341019	0.476869	1.90142	1.78616	0.207021	0.369306	3.07762	5.99392	3.2213	2.88268	3.03303
ENSG00000213742.7	ZNF337-AS1	102724826	0.445045	1.90796	1.97298	0.18634	0.34327	4.92419	4.2915	3.0575	3.26703	2.76764
ENSG00000101935.10	AMMECR1	9949	-0.257165	1.90078	0.656741	0.434025	0.601447	4.30867	3.22749	2.56612	3.61296	4.47371
ENSG00000122367.19	LDB3	11155	0.293481	1.89761	0.744715	0.405645	0.576378	3.26997	5.46191	3.0029	3.45921	2.9572
ENSG00000146005.4	PSD2	84249	-0.205677	1.9469	0.347681	0.566738	0.711498	3.07762	2.62455	5.07764	4.80446	3.41216
ENSG00000198795.11	ZNF521	25925	-1.05883	1.89496	12.392	0.00443569	0.0288299	2.15433	3.15656	2.23853	5.45787	5.08032
ENSG00000233061.1	TTLL7-IT1	100874314	-0.0847085	1.94628	0.0652476	0.802859	0.882235	2.92374	3.05016	5.18683	4.15106	3.67754
ENSG00000123453.18	SARDH	1757	-0.172331	1.901	0.340334	0.570806	0.714679	3.92397	3.61763	2.83911	4.15106	3.67754
ENSG00000156976.17	EIF4A2	1974	0.390211	9.66137	1.85563	0.198997	0.360051	804.49	599.108	1280.11	766.139	598.871
ENSG00000143033.18	MTF2	22823	0.316871	7.47041	1.92424	0.191467	0.349804	173.347	147.791	256.393	155.396	153.585
ENSG00000164403.14	SHROOM1	134549	0.337956	1.90683	1.19443	0.296617	0.467896	3.34691	5.03631	3.60348	3.15173	3.18468
ENSG00000171877.21	FRMD5	84978	1.18216	1.90485	12.933	0.00386675	0.0266075	5.57819	5.10724	3.43969	2.19083	1.97147
ENSG00000105519.17	CAPS	828	-1.77892	1.8911	25.6855	0.000306758	0.00640581	2.4621	1.17041	1.85634	5.26569	7.27926
ENSG00000069493.15	CLEC2D	29121	0.0901873	1.87102	0.0547817	0.819022	0.892429	4.00091	5.00084	1.85634	3.34391	3.52589
ENSG00000129993.15	CBFA2T3	863	-0.552596	1.91782	3.02662	0.108345	0.237197	3.15456	2.41175	3.82188	5.34256	3.79128
ENSG00000167920.10	TMEM99	147184	-0.649187	1.89396	4.9508	0.0467483	0.133965	3.34691	2.87282	2.62072	4.15106	5.11823
ENSG00000169857.8	AVEN	57099	-0.535887	1.87254	1.99228	0.184361	0.341133	2.42363	4.64617	1.91094	3.84357	4.92867
ENSG00000254781.1	GVINP2	100128135	0.283617	1.88207	0.599012	0.454442	0.618765	3.11609	5.71018	2.72991	2.80581	3.56381
ENSG00000200534.1	SNORA33	594839	1.27004	1.96101	12.2377	0.00461567	0.0294768	4.88572	3.44029	6.82478	1.76804	2.38851
ENSG00000133121.21	STARD13	90627	-1.17157	1.87574	15.122	0.00229095	0.0197488	2.76986	2.51815	1.80174	5.53474	5.19406
ENSG00000119397.16	CNTRL	11064	-0.0255986	7.41782	0.0213452	0.886351	0.93306	154.843	191.415	162.812	179.841	165.641
ENSG00000140511.11	HAPLN3	145864	1.58249	1.96748	12.7691	0.00402954	0.0273396	6.38606	2.48269	7.04317	1.99866	1.51651
ENSG00000174276.7	ZNHIT2	741	-1.25369	1.89292	13.5392	0.0033284	0.024374	3.03915	1.45415	2.51152	5.22725	5.87649
ENSG00000213337.9	ANKRD39	51239	-0.304397	1.88854	0.970456	0.34467	0.517842	4.15479	3.05016	2.67531	3.72826	4.4358
ENSG00000202515.1	VTRNA1-3	56662	1.35518	1.96052	13.8227	0.00310723	0.0235292	3.77009	4.22057	7.37076	1.99866	1.97147
ENSG00000256667.6	KLRA1P	10748	0.525869	1.86914	1.94588	0.189169	0.346736	4.50102	5.24911	2.34772	2.30614	3.33633
ENSG00000183638.6	RP1L1	94137	-0.468586	1.85118	1.01992	0.333141	0.506373	1.84657	5.53285	1.63795	3.95888	4.47371
ENSG00000186364.12	NUDT17	200035	-0.016651	1.88846	0.00332573	0.954994	0.975272	4.00091	3.61763	3.1667	3.57452	3.71546
ENSG00000272690.6	LINC02018	107986100	0.39355	1.88992	1.6633	0.222281	0.386535	4.73184	3.93683	3.33049	2.76737	3.33633
ENSG00000142046.15	TMEM91	641649	-0.721594	1.89411	4.97627	0.0462751	0.133049	3.50079	1.95068	3.2213	4.53541	4.96658
ENSG00000182326.15	C1S	716	0.865216	1.88622	4.92771	0.0471824	0.134864	6.80924	3.33389	3.0575	2.26771	2.57807
ENSG00000113758.13	DBN1	1627	-0.739822	7.39858	17.6173	0.00133119	0.0143511	131.261	150.38	117.277	211.281	232.936
ENSG00000117245.12	KIF17	57576	-0.128134	1.9034	0.160616	0.695874	0.808189	3.80856	2.73096	4.09487	4.57385	3.14677
ENSG00000123427.17	EEF1AKMT3	25895	0.279163	1.91756	0.621557	0.446283	0.612117	4.57796	2.58909	4.85924	3.92044	2.6539
ENSG00000123810.8	B9D2	80776	-0.959583	1.87769	11.667	0.00536081	0.0323797	2.69292	2.48269	2.62072	4.8429	5.26988
ENSG00000188163.8	FAM166A	401565	0.681871	1.86693	3.01698	0.108848	0.237924	2.88527	6.52592	3.1121	2.80581	2.42642
ENSG00000196154.12	S100A4	6275	0.300883	1.88492	0.91676	0.357859	0.532088	4.2702	4.04323	3.38509	3.84357	2.50225
ENSG00000198626.17	RYR2	6262	-0.368849	1.87658	1.40698	0.259288	0.42724	3.26997	3.5467	2.78451	5.03508	3.2605
ENSG00000248283.2	CCNL2P1	100418743	0.251038	1.90737	0.614189	0.448923	0.614515	2.80833	4.22057	4.80465	3.30547	3.29842
ENSG00000102057.10	KCND1	3750	-0.120879	1.89423	0.106217	0.750297	0.847266	4.84725	2.16348	3.54889	4.57385	3.07094
ENSG00000113971.20	NPHP3	27031	0.617047	1.93199	3.26405	0.0968034	0.220012	3.57773	3.44029	6.1696	2.84424	2.84346
ENSG00000163545.10	NUAK2	81788	-0.580933	1.90391	2.75679	0.123611	0.259685	2.92374	2.16348	4.14947	5.57318	3.56381
ENSG00000198315.11	ZKSCAN8	7745	0.171746	7.44847	0.590713	0.457507	0.621276	191.159	144.67	212.66	193.754	130.799
ENSG00000175741.5	RWDD4P2	647009	0.225585	1.87784	0.576404	0.462876	0.626587	3.61621	4.46884	3.33049	3.11329	3.41216
ENSG00000103449.12	SALL1	6299	4.09292	1.90897	122.54	1.62682e-07	8.33815e-05	6.03983	6.10032	5.67822	0.345921	0.341216
ENSG00000101000.6	PROCR	10544	1.1676	1.89079	15.4358	0.00213345	0.0189935	4.73184	4.82351	4.47706	2.19083	1.97147
ENSG00000124920.13	MYRF	745	0.292122	1.90117	0.892707	0.364011	0.537404	3.77009	3.44029	4.69545	3.72826	2.72972
ENSG00000128596.17	CCDC136	64753	1.64086	1.86451	14.075	0.00292487	0.0226845	3.50079	7.41259	3.71268	2.07553	1.06156
ENSG00000167107.12	ACSF2	80221	0.258566	1.88895	0.784756	0.393686	0.565122	4.2702	3.40483	3.98567	3.38234	3.10885
ENSG00000186369.10	LINC00643	646113	1.85786	1.874	21.2575	0.000655018	0.00974592	3.30844	7.51899	4.31326	1.42212	1.36486
ENSG00000221916.4	C19orf73	55150	0.273226	1.88906	0.909972	0.359579	0.533584	3.69315	3.8659	4.14947	3.11329	3.33633
ENSG00000141505.12	ASGR1	432	-0.240338	1.87599	0.513002	0.488013	0.648863	4.57796	2.34082	3.1121	4.03575	3.86711
ENSG00000177694.16	NAALADL2	254827	-0.237826	1.8498	0.403886	0.537426	0.687701	2.61598	4.75257	2.40232	2.92111	4.81493
ENSG00000100888.14	CHD8	57680	-0.382125	7.40728	5.03033	0.0452895	0.131186	146.149	168.397	139.335	194.754	199.649
ENSG00000239382.10	ALKBH6	84964	-0.0791292	1.86944	0.0586778	0.812828	0.888238	3.15456	4.0787	3.2213	4.65072	2.72972
ENSG00000241112.1	RPL29P14	100270974	0.173344	1.94215	0.138405	0.71658	0.823756	3.26997	1.80881	6.98858	3.84357	3.18468
ENSG00000102890.16	ELMO3	79767	-0.85954	1.8496	6.92675	0.0224398	0.0814544	3.53926	2.34082	2.02014	4.22793	5.38362
ENSG00000105329.10	TGFB1	7040	0.96712	1.94058	4.41778	0.0581355	0.155447	5.0396	2.12802	7.09777	2.95955	1.85773
ENSG00000159958.6	TNFRSF13C	115650	-0.136215	1.87662	0.130004	0.724909	0.82961	4.92419	1.91522	3.54889	3.72826	3.86711
ENSG00000261485.1	PAN3-AS1	100288730	0.460515	1.85217	1.87185	0.197183	0.357444	3.61621	5.10724	3.1121	2.34458	3.41216
ENSG00000261652.3	C15orf65	145788	0.492099	1.85481	2.48363	0.141903	0.284837	4.15479	4.68164	3.1121	2.61363	3.07094
ENSG00000132026.13	RTBDN	83546	-0.191799	1.86967	0.333405	0.574698	0.718032	3.11609	3.33389	3.71268	5.03508	2.69181
ENSG00000138080.14	EMILIN1	11117	-0.944459	1.85155	10.2515	0.00791443	0.0412504	3.00068	2.23442	2.45692	4.53541	5.34571
ENSG00000173928.3	SWSAP1	126074	-0.938037	1.84977	9.37567	0.0102199	0.0489022	3.26997	2.12802	2.29313	5.03508	4.81493
ENSG00000143198.13	MGST3	4259	-0.714706	7.40657	19.4982	0.000912689	0.0116698	138.416	136.016	130.435	224.426	218.567
ENSG00000188599.17	NPIPP1	100874381	0.945976	1.87491	8.30778	0.0141996	0.0602901	3.50079	5.28458	4.58625	2.6905	1.93355
ENSG00000130783.14	CCDC62	84660	1.23046	1.88441	14.9086	0.00240584	0.0203482	5.42431	3.8659	4.85924	2.22927	1.7819
ENSG00000164404.8	GDF9	2661	-0.12081	1.83907	0.135321	0.719603	0.825908	3.73162	3.9723	2.34772	4.18949	3.14677
ENSG00000225151.10	GOLGA2P7	388152	0.442637	1.87017	1.20062	0.295427	0.466684	5.46278	2.83736	3.71268	4.07418	1.81982
ENSG00000136383.6	ALPK3	57538	-1.39269	1.81691	10.1677	0.00810641	0.041896	1.30799	3.51123	1.31036	4.11262	6.7864
ENSG00000162148.11	PPP1R32	220004	0.425806	1.92208	0.756412	0.402093	0.573109	4.57796	1.48961	6.55179	3.49765	2.69181
ENSG00000180190.11	TDRP	157695	-1.32835	1.84748	14.8954	0.00241318	0.0203814	2.88527	1.38321	2.29313	6.0344	4.92867
ENSG00000236404.10	VLDLR-AS1	401491	0.496285	1.86561	2.90742	0.114781	0.246707	4.30867	3.83043	3.98567	3.03642	2.69181
ENSG00000122548.5	KIAA0087	9808	1.33765	1.87987	14.0861	0.00291715	0.0226704	5.11655	4.14963	5.07764	1.26838	2.50225
ENSG00000141854.9	MISP3	113230	-0.167114	1.89389	0.16601	0.691101	0.804416	3.30844	1.98615	5.24143	4.9582	2.84346
ENSG00000147649.10	MTDH	92140	0.192683	7.42227	1.27332	0.281944	0.45312	175.501	188.791	177.117	145.364	170.456
ENSG00000172216.6	CEBPB	1051	2.15425	1.94491	17.3502	0.00140741	0.0148778	6.463	2.09255	8.18974	1.19151	1.28904
ENSG00000259642.2	ST20-AS1	283687	0.493697	1.84561	2.17873	0.166555	0.31826	5.15502	3.72403	3.0029	2.42145	3.22259
ENSG00000134955.11	SLC37A2	219855	0.70091	1.87409	4.23645	0.0627567	0.163585	5.23196	2.87282	4.69545	2.80581	2.42642
ENSG00000215105.4	TTC3P1	286495	0.761365	1.83557	5.22459	0.0419501	0.124388	3.57773	5.56831	3.33049	2.45988	2.46433
ENSG00000132781.18	MUTYH	4595	0.177075	1.84596	0.34762	0.566771	0.711498	3.92397	3.58216	3.54889	2.72893	3.79128
ENSG00000164458.9	TBXT	6862	-1.41092	1.79202	5.9852	0.0314187	0.101792	0.807876	4.2915	0.818974	4.9582	5.80066
ENSG00000185453.13	ZSWIM9	374920	-0.037701	1.85168	0.0165919	0.899715	0.941656	3.30844	3.36936	3.82188	3.19016	3.98085
ENSG00000251348.1	HSPD1P11	100359396	-0.393575	1.83033	1.68115	0.219973	0.383713	3.53926	3.15656	2.51152	4.53541	3.56381
ENSG00000127129.10	EDN2	1907	-0.0773823	1.82383	0.0589626	0.812384	0.887915	3.8855	3.68856	2.51152	3.07486	4.05667
ENSG00000153531.13	ADPRHL1	113622	0.86898	1.84367	7.12415	0.020967	0.0782758	3.53926	5.28458	4.04027	2.6905	2.00938
ENSG00000265972.6	TXNIP	10628	1.15907	7.4735	26.9674	0.000250624	0.00572731	189.966	208.617	285.658	115.884	88.3369
ENSG00000217555.12	CKLF	688	-0.322884	1.83176	1.25917	0.284501	0.455369	3.11609	3.44029	2.89371	3.72826	4.17041
ENSG00000261308.2	FIGNL2	401720	0.820901	1.85382	6.63461	0.0248522	0.0873297	4.92419	3.79496	4.14947	2.88268	1.97147
ENSG00000125531.7	FNDC11	79025	-1.33253	1.82557	21.3749	0.000641107	0.00965644	2.26975	1.87975	2.29313	5.4963	5.3078
ENSG00000161860.8	SYCE2	256126	-0.0410744	1.82211	0.0121887	0.913977	0.950701	5.11655	2.76642	2.29313	3.11329	3.90502
ENSG00000188060.7	RAB42	115273	0.34453	1.83219	1.30373	0.276557	0.447515	3.46232	4.53977	3.38509	2.92111	3.07094
ENSG00000224167.2	LINC01357	105378912	-0.234194	1.82504	0.61691	0.447945	0.61386	3.03915	3.83043	2.78451	3.99731	3.60172
ENSG00000079337.16	RAPGEF3	10411	-0.266388	1.83429	0.863303	0.371749	0.54471	3.50079	2.94376	3.2213	3.95888	3.79128
ENSG00000155749.12	FLACC1	130540	0.0231423	1.79971	0.0029415	0.95767	0.976855	2.23128	5.78111	2.12933	3.42078	3.29842
ENSG00000268006.1	PTOV1-AS1	100506033	0.409232	1.82752	1.75244	0.211067	0.373286	3.80856	4.43337	3.2759	2.49832	3.29842
ENSG00000070759.17	TESK2	10420	-0.547309	1.85204	2.59419	0.134115	0.27477	2.8468	2.02162	4.14947	4.49698	4.20832
ENSG00000169398.19	PTK2	5747	-0.267593	7.4218	2.59597	0.133994	0.274648	155.651	151.125	168.654	197.829	183.688
ENSG00000214389.2	RPS3AP26	644972	-1.15778	1.81874	16.3927	0.00172631	0.0168226	2.42363	2.12802	2.34772	4.8429	5.42154
ENSG00000147586.10	MRPS28	28957	-0.818287	1.82829	7.76642	0.0169105	0.0676836	2.69292	2.23442	3.0575	4.80446	4.54954
ENSG00000173548.8	SNX33	257364	-0.664131	1.81132	4.60426	0.0538058	0.147317	2.34669	3.47576	2.45692	4.80446	3.98085
ENSG00000178531.6	CTXN1	404217	-1.74809	1.81542	28.5458	0.000197254	0.00491883	1.57728	1.59601	2.12933	7.30278	4.51163
ENSG00000179899.8	PHC1P1	653441	0.729051	1.85334	3.95014	0.070997	0.177879	3.03915	4.57524	5.07764	3.30547	1.7819
ENSG00000197582.5	GPX1P1	441481	-2.44251	1.80867	31.1391	0.000135844	0.00397992	1.76963	0.46107	1.47415	7.14904	6.14188
ENSG00000130810.20	PPAN	56342	-0.980661	1.80472	11.2272	0.00603302	0.0348443	2.4621	2.76642	2.07473	5.03508	4.62537
ENSG00000262454.4	MIR193BHG	100129781	0.294166	1.82538	0.823873	0.382521	0.554199	2.80833	4.64617	3.76728	2.72893	3.37424
ENSG00000118785.14	SPP1	6696	2.88115	1.80707	30.0106	0.00015931	0.00437287	3.11609	8.54754	3.98567	0.960892	0.454954
ENSG00000163635.18	ATXN7	6314	-0.704137	1.81063	5.9234	0.0321459	0.103512	2.80833	2.80189	2.56612	4.91977	3.98085
ENSG00000163605.15	PPP4R2	151987	0.680603	7.46428	9.7762	0.00907881	0.045169	201.238	164.496	257.758	115.153	144.107
ENSG00000189171.14	S100A13	6284	0.876994	1.7933	5.05042	0.0449296	0.130555	4.73184	5.28458	2.29313	1.88335	2.61599
ENSG00000250571.7	GLI4	2738	-0.717711	1.79211	4.60348	0.0538232	0.147342	2.57751	3.58216	1.80174	4.18949	4.62537
ENSG00000101986.12	ABCD1	215	-0.827395	1.79666	7.36952	0.0192936	0.073787	2.96221	2.76642	1.96554	4.8429	4.32206
ENSG00000123870.10	ZNF137P	7696	0.0292787	1.81507	0.00997531	0.922148	0.95538	3.80856	3.40483	3.1667	3.11329	3.67754
ENSG00000148411.8	NACC2	138151	0.259978	1.82358	0.472471	0.505364	0.661587	5.42431	2.41175	3.2759	3.61296	2.57807
ENSG00000165905.18	LARGE2	120071	0.0957892	1.82244	0.0867303	0.77358	0.86312	4.6549	2.66002	3.33049	3.30547	3.33633
ENSG00000170271.11	FAXDC2	10826	1.38564	1.83398	17.9865	0.00123364	0.0136523	5.61666	4.00777	4.31326	1.99866	1.55443
ENSG00000183386.10	FHL3	2275	-0.0956383	1.82659	0.109365	0.746765	0.845106	3.15456	3.22749	3.76728	3.49765	3.71546
ENSG00000204789.4	ZNF204P	7754	0.259766	1.798	0.518875	0.485586	0.646834	2.73139	5.32004	2.78451	2.88268	3.18468
ENSG00000212916.4	MAP10	54627	0.0987837	1.76459	0.0307454	0.863833	0.919918	1.69269	6.91606	1.41955	3.2286	3.10885
ENSG00000079246.16	XRCC5	7520	-0.137822	9.59274	0.558072	0.469911	0.633168	682.347	820.847	723.7	788.585	844.85
ENSG00000123349.14	PFDN5	5204	-0.0899612	7.42396	0.290444	0.600127	0.737931	165.499	158.502	178.045	184.837	171.366
ENSG00000248483.7	POU5F2	134187	0.340317	1.79537	0.998732	0.33801	0.511073	4.00091	4.6107	2.40232	2.80581	3.03303
ENSG00000086062.12	B4GALT1	2683	-0.0555267	1.81425	0.0304594	0.864461	0.920057	2.8468	3.7595	3.54889	4.26636	2.76764
ENSG00000259736.1	CRTC3-AS1	101926895	0.652681	1.83187	4.37338	0.059228	0.157359	4.38561	3.47576	4.42246	2.99798	2.19894
ENSG00000185527.12	PDE6G	5148	0.38985	1.76507	0.611076	0.450045	0.615709	2.15433	6.77419	1.91094	3.15173	2.42642
ENSG00000251072.2	LMNB1-DT	102723557	-0.367199	1.78812	1.30888	0.275659	0.446464	3.34691	3.40483	2.23853	3.26703	4.51163
ENSG00000257315.2	ZBED6	100381270	0.434274	1.87552	0.837144	0.378843	0.550734	3.46232	2.12802	6.66099	4.07418	1.89564
ENSG00000183199.6	HSP90AB3P	3327	-0.10394	1.80876	0.118585	0.736737	0.838334	2.88527	3.5467	3.54889	4.07418	3.07094
ENSG00000215067.10	ALOX12-AS1	100506713	-0.0423527	1.81122	0.0209923	0.887287	0.933441	3.19303	3.33389	3.65808	3.15173	3.8292
ENSG00000285427.1	SOD2-OT1	100129518	-0.13343	1.77963	0.145335	0.709925	0.818625	2.80833	4.53977	2.23853	3.84357	3.22259
ENSG00000104835.14	SARS2	54938	-0.911703	1.78826	10.0727	0.00833042	0.0426482	2.30822	2.73096	2.40232	4.80446	4.54954
ENSG00000198431.16	TXNRD1	7296	-0.111452	7.42295	0.447764	0.516497	0.670728	169.538	153.785	175.26	180.033	179.024
ENSG00000186010.19	NDUFA13	51079	-0.254613	1.83183	0.471246	0.505906	0.661919	3.34691	1.91522	4.53166	4.38167	3.33633
ENSG00000262155.2	LINC02175	283887	0.977144	1.81411	8.0684	0.0153293	0.063304	4.88572	3.79496	4.20407	2.80581	1.55443
ENSG00000262468.6	LINC01569	100507501	0.0246314	1.80368	0.0071503	0.934054	0.962545	3.07762	3.58216	3.65808	3.2286	3.52589
ENSG00000158246.8	TENT5B	115572	-0.779113	1.79918	6.57466	0.0253847	0.0884227	2.65445	2.12802	3.1667	4.8429	4.20832
ENSG00000179292.5	TMEM151A	256472	-0.336855	1.77715	0.932655	0.353878	0.527743	4.30867	2.62455	2.07473	3.68983	3.94293
ENSG00000185339.9	TCN2	6948	-0.28273	1.79079	0.982248	0.341869	0.514583	3.11609	3.19203	3.0029	3.88201	3.67754
ENSG00000211707.3	TRBV7-1	28597	0.449892	1.77259	1.35144	0.268388	0.438449	2.8468	5.60378	2.67531	3.2286	2.23686
ENSG00000278200.1	LINC01971	105371927	-0.0079361	1.77201	0.000531853	0.981993	0.990054	2.8468	4.64617	2.40232	3.26703	3.41216
ENSG00000161940.11	BCL6B	255877	-0.373957	1.79081	1.58291	0.233079	0.399122	3.50079	2.55362	3.0029	3.7667	4.05667
ENSG00000171729.14	TMEM51	55092	-0.554411	1.79382	3.53292	0.0855062	0.202289	2.80833	2.58909	3.1667	4.65072	3.71546
ENSG00000062650.19	WAPL	23063	0.154674	7.41548	0.813451	0.385448	0.55731	178.464	185.067	170.074	146.248	173.337
ENSG00000201302.1	SNORA65	26783	-0.169357	1.8086	0.273057	0.611123	0.74654	3.15456	2.69549	3.98567	4.4201	2.91929
ENSG00000152076.18	CCDC74B	91409	-1.00602	1.81539	5.38176	0.0394631	0.119381	2.11586	1.20588	4.14947	5.61161	4.20832
ENSG00000182752.10	PAPPA	5069	4.5129	1.85011	64.5141	4.48992e-06	0.000602136	7.5017	3.33389	6.55179	0.384357	0.113739
ENSG00000229931.1	ATXN1-AS1	101928433	-0.373185	1.81098	1.19033	0.297408	0.468617	3.00068	2.12802	4.14947	4.49698	3.45007
ENSG00000186026.7	ZNF284	342909	0.144541	1.76169	0.167619	0.689696	0.803302	4.03938	4.00777	2.18393	2.57519	3.63963
ENSG00000099822.3	HCN2	610	-0.894879	1.80556	3.78698	0.0762828	0.186494	2.92374	0.922141	3.87648	5.03508	4.39789
ENSG00000198841.4	KTI12	112970	0.0727266	1.80525	0.0443159	0.83692	0.903774	3.96244	2.30535	4.25866	2.84424	3.79128
ENSG00000079841.18	RIMS1	22999	2.11748	1.80991	36.7594	6.5208e-05	0.00263948	3.8855	5.53285	5.56902	1.30681	0.985734
ENSG00000135929.9	CYP27A1	1593	0.108012	1.77306	0.115834	0.739682	0.840564	4.42408	3.01469	2.83911	3.19016	3.18468
ENSG00000139219.19	COL2A1	1280	-0.478336	1.79687	2.17608	0.166792	0.318578	2.57751	2.30535	3.98567	4.18949	3.98085
ENSG00000129315.11	CCNT1	904	0.450845	7.46571	3.70812	0.0790095	0.191198	188.004	144.492	261.526	139.791	149.832
ENSG00000164946.19	FREM1	158326	-0.215548	1.76342	0.489534	0.497928	0.656306	3.34691	3.47576	2.45692	3.99731	3.22259
ENSG00000266053.2	NDUFV2-AS1	101927275	-0.294202	1.78385	0.987831	0.340555	0.513293	3.34691	2.58909	3.33049	3.92044	3.63963
ENSG00000279170.2	TSTD3	100130890	0.289176	1.76983	0.748736	0.404418	0.575371	2.73139	4.78804	3.2213	2.72893	3.14677
ENSG00000142102.16	PGGHG	80162	-1.07513	1.7713	12.481	0.00433567	0.0285109	2.50057	1.80881	2.62072	5.15038	4.54954
ENSG00000258301.3	VASH1-AS1	100506603	0.00127837	1.73816	1.16527e-05	0.997334	0.998678	3.65468	4.2915	1.69255	3.2286	3.2605
ENSG00000008283.16	CYB561	1534	-1.01894	1.744	10.8525	0.00668536	0.0370406	2.23128	2.83736	1.80174	4.91977	4.4358
ENSG00000204305.14	AGER	177	-0.270285	1.76218	0.802842	0.388462	0.560494	3.61621	2.80189	2.72991	3.99731	3.37424
ENSG00000065361.15	ERBB3	2065	1.19081	1.7595	12.7817	0.00401677	0.0272736	4.84725	4.64617	3.2759	1.6143	2.12312
ENSG00000144668.12	ITGA9	3680	0.487301	1.75508	2.36978	0.150528	0.296772	4.07785	4.14963	2.89371	2.92111	2.38851
ENSG00000213326.4	RPS7P11	644315	0.0797698	1.78602	0.0628986	0.806359	0.883862	3.69315	2.55362	4.14947	3.15173	3.37424
ENSG00000052841.15	TTC17	55761	0.411038	7.43714	5.62936	0.0358945	0.111674	188.504	175.739	212.715	145.287	143.955
ENSG00000255837.1	TAS2R20	259295	0.0696	1.7572	0.0504827	0.826135	0.897096	3.38538	3.72403	2.94831	2.65206	3.75337
ENSG00000273899.5	NOL12	79159	-0.804963	1.75776	7.30586	0.019712	0.0747728	2.96221	2.12802	2.51152	4.45854	4.39789
ENSG00000158747.14	NBL1	4681	-1.09867	1.74467	11.683	0.00533797	0.032307	2.96221	1.80881	1.91094	4.49698	5.08032
ENSG00000204253.4	HNRNPCP2	653447	0.0928118	1.81546	0.0457702	0.834309	0.902367	3.42385	1.66695	5.67822	3.53608	3.10885
ENSG00000231663.1	COA6-AS1	101927765	0.366336	1.78663	1.26491	0.28346	0.454545	4.00091	2.76642	4.42246	2.53676	3.22259
ENSG00000240869.3	RN7SL128P	106481826	-0.482081	1.77037	1.60893	0.229509	0.395025	3.8855	1.59601	3.1667	4.61228	3.41216
ENSG00000127666.9	TICAM1	148022	-1.28555	1.7292	16.3371	0.00174733	0.0169618	2.03892	2.55362	1.47415	5.15038	4.81493
ENSG00000154553.15	PDLIM3	27295	2.91836	1.82527	39.0435	4.96051e-05	0.00224008	6.84771	2.73096	6.60639	0.730278	0.682431
ENSG00000215915.10	ATAD3C	219293	0.366539	1.76213	1.39876	0.260608	0.428903	2.92374	4.2915	3.71268	2.88268	2.76764
ENSG00000168970.22	JMJD7-PLA2G4B	8681	-1.0932	1.73549	11.353	0.00583096	0.0341835	2.96221	1.87975	1.80174	4.34323	5.15615
ENSG00000147854.17	UHRF2	115426	0.170397	7.45676	0.54711	0.474206	0.636354	163.922	140.733	246.893	163.236	163.366
ENSG00000185739.13	SRL	6345	0.588674	1.72951	2.80653	0.120604	0.255062	3.57773	5.03631	2.51152	2.53676	2.42642
ENSG00000228451.4	SDAD1P1	157489	0.903132	1.74777	5.89977	0.0324293	0.104219	2.65445	5.71018	3.71268	2.03709	2.27477
ENSG00000241135.6	LINC00881	100498859	0.213108	1.75863	0.482839	0.500822	0.658621	3.2315	3.61763	3.65808	3.53608	2.50225
ENSG00000245146.7	MALINC1	100505636	0.537764	1.74537	3.00063	0.109709	0.239163	4.15479	3.9723	3.0575	2.34458	2.80555
ENSG00000248890.2	HHIP-AS1	646576	1.30869	1.81148	11.7656	0.00522243	0.0318765	4.6549	2.80189	6.2788	1.92178	1.74399
ENSG00000265688.2	MAFG-DT	92659	-0.878013	1.72145	5.92059	0.0321795	0.103584	1.88504	3.5467	1.69255	4.80446	4.01876
ENSG00000064225.12	ST3GAL6	10402	-0.45811	1.74808	1.76339	0.209742	0.372236	3.8855	1.87975	2.78451	3.95888	3.86711
ENSG00000153237.18	CCDC148	130940	0.266529	1.73128	0.57207	0.464523	0.6282	3.00068	4.68164	2.67531	3.45921	2.31268
ENSG00000175193.13	PARL	55486	-0.410356	1.74474	2.05248	0.178355	0.333282	2.96221	2.80189	2.89371	3.84357	3.8292
ENSG00000179406.8	LINC00174	285908	0.153905	1.72656	0.183544	0.676193	0.794174	3.8855	3.93683	2.18393	3.68983	2.3506
ENSG00000154162.15	CDH12	1010	-0.396123	7.40469	5.83508	0.0332204	0.105945	146.803	156.019	148.234	206.015	189.716
ENSG00000180730.4	SHISA2	387914	-0.0177318	1.73238	0.00304846	0.956909	0.976338	2.88527	4.11417	2.62072	2.95955	3.56381
ENSG00000196357.12	ZNF565	147929	-0.429327	1.7363	2.13911	0.170147	0.322753	2.92374	3.08563	2.51152	4.07418	3.60172
ENSG00000107282.8	APBA1	320	-0.20895	1.735	0.502258	0.492508	0.651941	3.00068	3.40483	2.72991	3.34391	3.71546
ENSG00000220842.6	RPL21P16	729402	-1.8254	1.73168	31.4665	0.000129813	0.00389745	1.76963	1.13494	1.91094	6.18815	5.11823
ENSG00000229816.1	DDX50P1	192146	0.0899233	1.73687	0.0733512	0.791278	0.874275	4.50102	2.83736	2.62072	3.07486	3.18468
ENSG00000082196.20	C1QTNF3	114899	-0.194614	1.74204	0.457511	0.512052	0.666693	3.07762	3.01469	3.1667	3.45921	3.60172
ENSG00000102796.11	DHRS12	79758	-0.492054	1.71142	1.60021	0.230697	0.396456	3.8855	2.76642	1.47415	3.19016	4.51163
ENSG00000130748.7	TMEM160	54958	-1.296	1.73095	19.2248	0.000962678	0.0120597	2.07739	1.80881	2.23853	5.41943	4.58745
ENSG00000136367.14	ZFHX2	85446	0.120938	1.71549	0.112547	0.743253	0.842861	3.46232	4.2915	2.07473	3.53608	2.54016
ENSG00000248593.3	DSTNP2	171220	0.205322	1.73512	0.43595	0.52198	0.675501	3.07762	4.0787	3.1121	2.61363	3.33633
ENSG00000180008.9	SOCS4	9306	0.609468	7.43399	9.17637	0.0108506	0.0505682	217.165	170.702	213.643	111.002	151.803
ENSG00000224186.8	C5orf66	100996485	0.608098	1.72026	3.14845	0.102222	0.228021	3.38538	5.00084	2.72991	2.53676	2.3506
ENSG00000230629.2	RPS23P8	653658	-0.149842	1.75084	0.246852	0.628583	0.759304	3.07762	2.69549	3.71268	3.68983	3.29842
ENSG00000235821.1	IFITM4P	340198	-0.202265	1.75228	0.369678	0.554898	0.702409	3.65468	2.09255	3.60348	3.7667	3.37424
ENSG00000269335.5	IKBKG	8517	-0.785344	1.73721	5.09198	0.0441962	0.129	3.15456	1.73788	2.67531	5.26569	3.41216
ENSG00000088826.18	SMOX	54498	-0.579767	1.7298	3.82719	0.074937	0.184301	2.76986	2.58909	2.72991	4.57385	3.48798
ENSG00000107201.10	DDX58	23586	-1.12485	1.70752	12.5814	0.00422598	0.0280465	2.19281	2.62455	1.58335	5.07351	4.32206
ENSG00000135299.17	ANKRD6	22881	0.865925	1.76425	6.96251	0.0221641	0.0808347	3.84703	3.5467	4.85924	1.80648	2.6539
ENSG00000267796.8	LIN37	55957	0.160304	1.76553	0.226704	0.642821	0.770364	2.65445	3.05016	4.80465	3.03642	3.18468
ENSG00000268696.3	ZNF723	646864	2.0255	1.79471	20.508	0.000752673	0.0105051	6.23218	2.44722	6.115	1.03776	1.36486
ENSG00000168038.11	ULK4	54986	0.0956238	1.7232	0.0974585	0.760442	0.854627	3.92397	3.22749	2.72991	3.15173	3.03303
ENSG00000165323.15	FAT3	120114	1.94178	7.47124	67.6876	3.53225e-06	0.000519386	224.782	228.585	302.584	79.0622	52.0922
ENSG00000230487.8	PSMG3-AS1	114796	-0.996124	1.70705	9.33446	0.0103466	0.0491649	1.88504	3.01469	1.85634	4.91977	4.1325
ENSG00000185652.12	NTF3	4908	-1.23428	1.72795	9.71311	0.00924812	0.0457884	1.19258	2.23442	2.89371	6.26502	3.56381
ENSG00000233892.1	PAIP1P1	100421582	0.220626	1.71887	0.532594	0.479998	0.641678	3.57773	3.7595	2.83911	2.99798	2.84346
ENSG00000157429.16	ZNF19	7567	-0.363731	1.69214	1.01	0.335409	0.508399	3.19303	3.58216	1.58335	3.45921	3.79128
ENSG00000184160.8	ADRA2C	152	-1.53193	1.71065	21.0647	0.000678642	0.00991381	2.19281	1.27681	1.96554	4.4201	6.02814
ENSG00000189114.8	BLOC1S3	388552	-0.263669	1.72744	0.70931	0.416701	0.585922	3.61621	2.30535	3.0575	3.72826	3.45007
ENSG00000196843.17	ARID5A	10865	-0.204708	1.75002	0.349805	0.565572	0.710828	3.07762	2.09255	4.20407	3.92044	3.22259
ENSG00000204335.4	SP5	6440	-1.57511	1.71929	22.2773	0.000545024	0.00893892	1.38493	1.56055	2.45692	5.88066	4.7391
ENSG00000206530.11	CFAP44	55779	0.705495	1.67616	2.02705	0.18086	0.336457	2.80833	6.49045	1.58335	2.03709	2.46433
ENSG00000224424.8	PRKAR2A-AS1	100506637	-0.0251904	1.73464	0.00655045	0.936873	0.964253	3.69315	2.51815	3.49429	3.49765	3.07094
ENSG00000137776.17	SLTM	79811	0.493653	7.41114	5.97295	0.0315613	0.102161	155.074	235.217	186.999	139.483	133.87
ENSG00000152284.5	TCF7L1	83439	-1.11351	1.70746	10.6225	0.00712696	0.0385673	2.61598	1.84428	2.02014	5.99597	3.37424
ENSG00000197744.5	PTMAP2	5759	0.855518	1.76781	4.04386	0.0681622	0.173588	2.00045	4.32697	6.00581	2.38301	2.12312
ENSG00000147166.11	ITGB1BP2	26548	-0.299996	1.70832	1.02458	0.332085	0.505154	2.69292	3.29843	2.72991	3.38234	3.79128
ENSG00000254911.3	SCARNA9	619383	2.53445	1.76227	40.643	4.1265e-05	0.0020449	6.34759	3.22749	5.45983	0.884021	0.834082
ENSG00000272034.1	SNORD14A	26822	-0.0676372	1.75538	0.0332299	0.858502	0.916706	2.88527	2.09255	4.85924	3.61296	3.18468
ENSG00000136048.14	DRAM1	55332	1.84679	1.7033	24.3203	0.000383527	0.00728728	5.6936	4.71711	2.94831	1.30681	1.1753
ENSG00000161040.16	FBXL13	222235	0.935343	1.73078	9.55857	0.00967895	0.0470672	4.23173	3.68856	4.14947	2.1524	2.04729
ENSG00000224825.2	RORB-AS1	103752585	0.487233	1.74022	2.19876	0.164776	0.316072	3.80856	2.90829	4.42246	3.07486	2.19894
[truncated: 15,940 more rows]
