# Supplementary material for: Early Mechanisms of Chemoresistance in Retinoblastoma
Source: Cancers (Basel). 2022 Oct 10;14(19):4966. doi: 10.3390/cancers14194966 (PMC9563111; doi:10.3390/cancers14194966)
Supplement: Supplementary file 1 [file cancers-14-04966-s001.zip › Table S2_GSEA.xlsx]

## Sheet: UP in 4xC
	ID	Description	setSize	enrichmentScore	NES	pvalue	p.adjust	qvalues	rank	leading_edge	core_enrichment
SENGUPTA_NASOPHARYNGEAL_CARCINOMA_WITH_LMP1_UP	SENGUPTA_NASOPHARYNGEAL_CARCINOMA_WITH_LMP1_UP	SENGUPTA_NASOPHARYNGEAL_CARCINOMA_WITH_LMP1_UP	184	0.468044	3.56629	1e-10	1.8e-08	1.52e-08	2819	tags=67%, list=34%, signal=46%	TMTC1/PPM1K/PAPPA/F5/ALCAM/ENPP4/SCAMP1/B4GALT6/CALB1/HSPA4L/DDX3Y/ZMAT3/LMO7/FAM171B/LUC7L3/LARP6/CNR1/ARHGAP18/EIF5A2/C3orf52/TRPA1/KLHL13/PKN2/SPAG9/MDM2/MYO6/FOXA1/DNM3/GXYLT1/ANKRD20A1/TRIM5/POPDC3/NAMPT/SLCO1A2/PARM1/DCUN1D1/GALNT7/SAMD9L/TNC/NT5DC1/C5orf24/PGM5/MPPED2/WDR72/SMC5/DNAJB14/PLAT/KLF5/MALAT1/CFTR/CEP290/KRAS/TTC14/TFPI/DNAJC3/PRRX1/KYNU/ENPP2/LIFR/FBXW7/ESF1/NETO2/OXR1/ADCY10/X…
HAMAI_APOPTOSIS_VIA_TRAIL_UP	HAMAI_APOPTOSIS_VIA_TRAIL_UP	HAMAI_APOPTOSIS_VIA_TRAIL_UP	308	0.420682	3.48229	1e-10	1.8e-08	1.52e-08	3848	tags=84%, list=46%, signal=47%	PTPN13/SNX10/ITPR2/TENT5A/HMMR/GCC2/SPESP1/RRM2B/GOLGA4/DPP4/CHORDC1/CCDC47/COL25A1/JAKMIP2/HSPA4L/SPP1/MPHOSPH10/DYNLT3/LUC7L3/ATXN3/OSBPL10/SHTN1/CHMP2B/MMD/CCDC112/SKAP2/ASB5/SEC62/SUCO/MYO6/AIMP1/BLZF1/PPIL4/PAPSS2/ITSN2/HSPH1/MYEF2/TAX1BP1/DNAJC7/CEP70/DNAJC13/TCEAL9/IGF1/NUCB2/GKAP1/PROS1/TMF1/DCUN1D1/TCEAL2/SMPDL3A/PIBF1/UCHL5/KIF20B/KIF3A/PNISR/EEA1/CCDC59/SSB/SLU7/ZNF138/MGAT4A/DNAJB14/S…
MILI_PSEUDOPODIA_HAPTOTAXIS_UP	MILI_PSEUDOPODIA_HAPTOTAXIS_UP	MILI_PSEUDOPODIA_HAPTOTAXIS_UP	250	0.420923	3.3462	1e-10	1.8e-08	1.52e-08	3517	tags=78%, list=42%, signal=47%	MLLT3/CFAP97/TMEM263/MEF2A/DNAJB4/DYNLT3/NR3C1/HDGFL3/PCNP/NFIA/CHMP2B/SETD7/BTBD1/RPS6KA6/TLK2/CD2AP/RBM7/ZRANB2/ESCO1/ZNF326/DYNLL2/RNF138/MYEF2/TAX1BP1/CARNMT1/NAMPT/GKAP1/DOCK11/ZNRF2/INPP1/SERPINB9/MOB4/DCUN1D1/PSIP1/CISD2/SAMD9L/UCHL5/C5orf24/CYB5R4/QKI/SAMD4A/SSB/SLU7/SMC5/STYX/RO60/PTPN2/KRAS/TTC33/ZRSR2/PSMC3IP/SRP54/ESF1/SH3BGRL/OXR1/RBIS/BEND6/XAF1/RAB8B/UGP2/STRN/BCLAF1/FGFR1OP2/RWDD1…
BLANCO_MELO_BETA_INTERFERON_TREATED_BRONCHIAL_EPITHELIAL_CELLS_UP	BLANCO_MELO_BETA_INTERFERON_TREATED_BRONCHIAL_EPITHELIAL_CELLS_UP	BLANCO_MELO_BETA_INTERFERON_TREATED_BRONCHIAL_EPITHELIAL_CELLS_UP	159	0.458613	3.32817	1e-10	1.8e-08	1.52e-08	2059	tags=57%, list=25%, signal=44%	NCOA7/REPS2/ITGA1/IFIT5/TENT5A/SLC41A2/SYNJ2/PARP12/KCTD12/ENPP4/TRIM21/FAS/GCNT4/PDK4/LMO2/STK17A/ELOVL7/SCG5/C3orf52/DRAM1/CASP7/IL16/NECTIN3/SMURF2/BLZF1/DHX58/MAN1A1/TRIM5/MUC16/PLSCR1/ARNTL2/C3/CFLAR/SERPINB9/SKIL/MED13/TRIM38/SAMD9L/TMEM229B/OAS3/STARD5/QKI/NLRC5/ZNF800/TNFSF15/EIF2AK2/KCNQ3/ARL5B/PLAT/SAMD8/TRIM56/NMNAT2/RO60/NAV3/EDIL3/PCGF5/NCALD/SLFN5/IRF1-AS1/XAF1/CNTN3/RAB8B/CSGALNACT…
SHEN_SMARCA2_TARGETS_UP	SHEN_SMARCA2_TARGETS_UP	SHEN_SMARCA2_TARGETS_UP	180	0.406847	3.07289	1e-10	1.8e-08	1.52e-08	4241	tags=89%, list=51%, signal=45%	ZCCHC10/LUC7L3/PCNP/SEC62/PKN2/ZFAND6/ITSN2/RAB21/TSNAX/SPTLC1/TMED7/MOB4/NBR1/CBX1/RB1/PIBF1/EIF2AK2/ATF1/SSB/UPF3B/SMC5/TLK1/SNX2/RO60/NPEPPS/RAB22A/CAST/SHOC2/TTC33/GTF3C3/RAB6A/SCFD1/CALCOCO2/PSMD12/BCLAF1/MED21/UBL3/NEK7/STAM2/PREPL/SEC23IP/BEX4/ZC3H13/APOOL/SEC63/FMR1/DPM1/COPS2/PJA2/ARID4B/CREG1/VPS13C/TWF1/MORF4L1/GNAQ/ATG3/VPS26A/SENP6/SS18/SLK/LSM14A/BBIP1/OSBPL8/CLINT1/ISCU/UPF2/RSBN1/…
SENGUPTA_NASOPHARYNGEAL_CARCINOMA_WITH_LMP1_DN	SENGUPTA_NASOPHARYNGEAL_CARCINOMA_WITH_LMP1_DN	SENGUPTA_NASOPHARYNGEAL_CARCINOMA_WITH_LMP1_DN	53	0.529695	2.97166	1.81e-09	2.33e-07	1.96e-07	1973	tags=66%, list=24%, signal=51%	PDPN/ABCB1/ST8SIA1/ST6GALNAC5/GREB1/PDK4/RADX/MAP2/SLC26A4/ABI3BP/FREM2/CNTNAP3/SLC6A15/PROS1/FCRL3/CEACAM6/C7/CHI3L2/ABCA12/SLC6A13/CMAHP/CFAP70/SNTN/GDA/DMKN/CCDC113/CWF19L2/TF/MFAP5/ELF5/ACSS3/MYBL1/DOCK5/MCOLN3/DACH1
CHARAFE_BREAST_CANCER_LUMINAL_VS_BASAL_DN	CHARAFE_BREAST_CANCER_LUMINAL_VS_BASAL_DN	CHARAFE_BREAST_CANCER_LUMINAL_VS_BASAL_DN	204	0.38376	2.96986	1e-10	1.8e-08	1.52e-08	1871	tags=47%, list=22%, signal=37%	NDFIP2/FGF2/MAP7D3/ITGA1/SNX7/SERPINE2/HOXA1/RGL1/HOTAIRM1/MFGE8/GPX8/TGFBI/FAS/DNAJB4/BTN3A2/GNAI1/TLE4/NR3C1/LARP6/COL4A2/STK17A/SKAP2/LIPG/RBM7/CDC42EP3/PKN2/ANTXR1/PGM2/LAMA3/CYBRD1/BTN3A3/SMAD3/AKR1B10/PSMB8/EPHA2/B2M/F2RL1/PLSCR1/ARNTL2/IL1RAP/NAMPT/TCEAL9/C3/INPP1/RRAS2/TMEM154/TMED5/CFLAR/SLC6A15/TMEM30A/EGFR/TRIM29/PSMB9/MIR100HG/ADORA2B/PDGFC/MET/OSBPL3/PERP/DSG2/CYLD/CCDC80/COL4A1/ACTN…
SABATES_COLORECTAL_ADENOMA_DN	SABATES_COLORECTAL_ADENOMA_DN	SABATES_COLORECTAL_ADENOMA_DN	99	0.43567	2.84773	1.58e-10	2.55e-08	2.15e-08	2139	tags=59%, list=26%, signal=44%	KIF5C/ANO5/PCDH19/ZNF483/CPNE8/TPH1/FAM13C/KCTD12/RUNDC3B/TRPM6/TMEM255A/HSD17B2/CA4/TM6SF2/PRKAA2/GCNT2/ABI3BP/SYNPO2/COLEC12/GREM2/EFEMP1/CD36/FN1/SCN7A/CNTN4/IGF1/SPINK5/MIR100HG/FCRL3/C7/LYVE1/CCDC80/CMAHP/ADH1B/TNS1/ABCA8/LIFR/MYH11/EDIL3/GPNMB/DSEL/SLC17A4/CLU/MFAP5/TRAF3IP3/F13A1/AFF3/SCN9A/CPM/BEST4/PDE6A/SLC51A/DOCK10/RSPO2/ATP1A2/CA2/WNT2B/LAMA1
VECCHI_GASTRIC_CANCER_EARLY_DN	VECCHI_GASTRIC_CANCER_EARLY_DN	VECCHI_GASTRIC_CANCER_EARLY_DN	146	0.390182	2.80426	1e-10	1.8e-08	1.52e-08	2191	tags=54%, list=26%, signal=41%	KIF5C/NDNF/HLF/SYNM/KANK4/SPESP1/HHIP/ZNF385B/NR3C2/PDK4/BMPR1B/NR3C1/LARP6/HDGFL3/PTGER3/ABAT/CYP1B1/TSC22D3/RPS6KA6/MANEA/LNC-LBCS/CGNL1/SUSD4/GCNT2/CYBRD1/NTRK3/SYNPO2/GREM2/RGS4/EFEMP1/HMGN5/WIPF3/CD302/PLIN1/CEP85L/CD36/COL4A6/SCN7A/MAGEH1/ADTRP/TCEAL2/C7/LYVE1/SLC28A2/PDGFC/NT5DC1/SVEP1/ADH1B/TENT5C/MTTP/ABCA8/ADGRL3/SLC26A7/ENPP2/LIFR/MAP9/ELL2/UBL3/CLU/MFAP5/BEX5/ID4/PGC/F13A1/GRIP2/AFF3/…
BLANCO_MELO_HUMAN_PARAINFLUENZA_VIRUS_3_INFECTION_A594_CELLS_UP	BLANCO_MELO_HUMAN_PARAINFLUENZA_VIRUS_3_INFECTION_A594_CELLS_UP	BLANCO_MELO_HUMAN_PARAINFLUENZA_VIRUS_3_INFECTION_A594_CELLS_UP	87	0.430752	2.74991	5.9e-09	6.59e-07	5.54e-07	2059	tags=55%, list=25%, signal=42%	PPM1K/IFIT5/PARP12/ERAP1/BTN3A1/TRIM21/LMO2/MAP2/HCP5/DHX58/BTN3A3/B2M/TRIM5/PLSCR1/RUNX2/TRIM38/MIR100HG/SAMD9L/CD38/OAS3/NLRC5/EIF2AK2/CLMP/DDX60/LIFR/IRF1-AS1/XAF1/PSMB8-AS1/XDH/EPHA4/RUFY4/TAP1/TRIM22/PMAIP1/PARP9/IFI16/DTX3L/PHF11/SP100/CREB5/ETV7/ITGA2/ATF3/CD274/ALDH1L2/GLIPR1/TRIM14/ERAP2
FLORIO_NEOCORTEX_BASAL_RADIAL_GLIA_UP	FLORIO_NEOCORTEX_BASAL_RADIAL_GLIA_UP	FLORIO_NEOCORTEX_BASAL_RADIAL_GLIA_UP	129	0.38921	2.73994	3.9e-10	6.11e-08	5.13e-08	2088	tags=56%, list=25%, signal=43%	RARB/CPNE8/KANK4/TEX14/CRABP1/GREB1/PLB1/RGS5/FAM241A/TSBP1/BNC2/PPM1H/SPN/CCDC168/SV2C/CGNL1/PCTP/HFE/ITGBL1/STEAP2/SMAD3/PLA2R1/ZBTB8B/SGCD/SYNPO2/VAV3/ACAN/ADAMTS9/TMEM154/ADTRP/BEST3/SELL/C7/SLC28A2/C2orf50/ESRP1/IRF6/COL4A1/PYHIN1/TIMD4/PCDH11Y/FRK/TMC7/NRP1/MARVELD2/OPRK1/CFAP54/SLC17A4/TRIM58/ANKRD55/TRIM22/BVES/EML6/CLNK/NEK7/TTC39B/AXDND1/ELF5/CNKSR3/PAX3/DOCK5/HES2/HTR4/BLOC1S6/SLC6A4/M…
BLANCO_MELO_COVID19_SARS_COV_2_INFECTION_CALU3_CELLS_UP	BLANCO_MELO_COVID19_SARS_COV_2_INFECTION_CALU3_CELLS_UP	BLANCO_MELO_COVID19_SARS_COV_2_INFECTION_CALU3_CELLS_UP	123	0.393439	2.72364	1.36e-09	1.82e-07	1.53e-07	1954	tags=52%, list=23%, signal=40%	NCOA7/HDAC9/PPM1K/IFIT5/TENT5A/STC2/NGFR/PARP12/ITGAM/TRIM21/RBM11/SCN3A/TXNIP/LMO2/CYP1B1/MUC4/DHX58/SYNPO2/FUT1/TRIM5/CNTN4/HDX/SERPINB9/RUNX2/INHBE/SAMD9L/KMO/IKZF3/OAS3/NLRC5/EIF2AK2/COL4A1/DDX60/PLAT/KLF10/NPR1/LIFR/MAST4/NAV3/SLFN5/IRF1-AS1/CYTH4/XAF1/PSMB8-AS1/TAP1/NLRP1/TRIM22/PMAIP1/HSH2D/PARP9/PTAFR/IFI16/GADD45A/CXCL3/DTX3L/PHF11/SP100/ZBTB10/CREB5/ETV7/ATF3/CD274/SLC5A5/ALDH1L2
WARTERS_RESPONSE_TO_IR_SKIN	WARTERS_RESPONSE_TO_IR_SKIN	WARTERS_RESPONSE_TO_IR_SKIN	43	0.493442	2.64417	1.9e-06	0.000111777	9.39e-05	670	tags=37%, list=8%, signal=34%	PPM1D/PAPPA/CFAP57/ALCAM/RRM2B/TGFBI/FAS/HSPA4L/DNAJB4/SESN1/DRAM1/MDM2/FRMD4A/TP53INP1/CABYR/RAD51C
GOMF_CYTOKINE_ACTIVITY	GOMF_CYTOKINE_ACTIVITY	GOMF_CYTOKINE_ACTIVITY	33	0.533713	2.64168	6.73e-06	0.000352174	0.000295801	2434	tags=73%, list=29%, signal=52%	FGF2/TIMP1/KITLG/SPP1/C5/IL16/WNT4/AIMP1/GREM2/CMTM8/BMP4/NAMPT/INHBE/WNT8A/TNFSF15/LTA/IL19/CXCL3/CX3CL1/WNT2B/TNFSF13B/FAM3C/WNT10A/THNSL2
LIU_VAV3_PROSTATE_CARCINOGENESIS_UP	LIU_VAV3_PROSTATE_CARCINOGENESIS_UP	LIU_VAV3_PROSTATE_CARCINOGENESIS_UP	28	0.569424	2.63993	1.55e-06	9.45e-05	7.94e-05	1675	tags=64%, list=20%, signal=52%	HDAC9/ABCB4/PITX2/SPP1/PSMB8/CD36/FN1/C3/IGF1/PSMB9/TNC/PLAT/GPNMB/PLOD2/LILRB3/EPHA4/TAP1/CD74
CUI_TCF21_TARGETS_2_DN	CUI_TCF21_TARGETS_2_DN	CUI_TCF21_TARGETS_2_DN	410	0.309106	2.63919	1e-10	1.8e-08	1.52e-08	2925	tags=55%, list=35%, signal=38%	TMTC1/LIPA/ABCB1/PPM1K/KITLG/TENT5A/MERTK/CPNE8/TOB1/KANK4/TMEM150C/FAM13C/PARP12/MED12L/KCTD12/SERPINB6/ENPP4/ENDOD1/DUBR/DPP4/RFK/SORBS1/COL25A1/GALNT10/DNAJB4/TXNIP/DYNLT3/LMO2/TLE4/TMEM106B/LMO7/IL2RG/FAM241A/SETD7/MMD/NECTIN3/CDC42EP3/EGF/MYO6/RIPOR2/PGM2/LYSMD3/ST6GALNAC3/ESCO1/TP53INP1/RAP1B/HOPX/MAN1A1/COLEC12/ITSN2/RAB6B/DCDC2/TRIM5/UACA/WIPF3/PLSCR1/ARFGEF3/PCMTD1/CEP85L/CEBPB/CD36/DAAM…
BLANCO_MELO_RESPIRATORY_SYNCYTIAL_VIRUS_INFECTION_A594_CELLS_UP	BLANCO_MELO_RESPIRATORY_SYNCYTIAL_VIRUS_INFECTION_A594_CELLS_UP	BLANCO_MELO_RESPIRATORY_SYNCYTIAL_VIRUS_INFECTION_A594_CELLS_UP	111	0.386165	2.62104	1.62e-08	1.62e-06	1.36e-06	1881	tags=50%, list=23%, signal=40%	PPM1K/STC2/SERPINE2/PARP12/SORBS1/LMO2/COL15A1/PGF/MAP2/LIPG/DHX58/B2M/NRIP3/ARNTL2/IL1RAP/C3/TMEM154/SLC6A15/RUNX2/COL13A1/SAMD9L/TNC/SLC6A12/OAS3/LACC1/NLRC5/SAMD4A/KCNQ3/CLMP/DDX60/NID2/NAV3/SLFN5/DSEL/PLOD2/COL17A1/XAF1/XDH/MICB/LAMA4/IGFN1/TAP1/TRIM22/PMAIP1/PARP9/PTAFR/ADGRE2/IFI16/NFKBIZ/ID4/DTX3L/SP100/CREB5/CPM/ATF3/CD274
GOCC_DYNEIN_COMPLEX	GOCC_DYNEIN_COMPLEX	GOCC_DYNEIN_COMPLEX	24	0.584812	2.61642	4.79e-06	0.000263074	0.000220964	1523	tags=62%, list=18%, signal=51%	DYNC2H1/DNAH5/DYNLT3/DNAH8/DNAH14/DNAH10/DNAH6/DNAH12/DNAH2/DYNLL2/DNAH7/CFAP70/DNAH9/DNAH11/DRC1
GHANDHI_DIRECT_IRRADIATION_UP	GHANDHI_DIRECT_IRRADIATION_UP	GHANDHI_DIRECT_IRRADIATION_UP	40	0.494267	2.61472	1.73e-06	0.000103286	8.68e-05	1850	tags=60%, list=22%, signal=47%	FGF2/RRM2B/FAS/HSPA4L/SESN1/C3orf52/MDM2/FRMD4A/ANKRD20A1/RGS9/NAMPT/ASCC3/OSBPL3/SLC30A1/SMC5/KYNU/C2CD4B/NPIPB5/NFKBIZ/GADD45A/BTG3/CXCL3/CREB5/MYBL1
PICCALUGA_ANGIOIMMUNOBLASTIC_LYMPHOMA_UP	PICCALUGA_ANGIOIMMUNOBLASTIC_LYMPHOMA_UP	PICCALUGA_ANGIOIMMUNOBLASTIC_LYMPHOMA_UP	89	0.407474	2.60979	9.84e-08	8.26e-06	6.94e-06	1715	tags=48%, list=21%, signal=39%	PDPN/RGL1/KCTD12/ACTA2/COL15A1/RGS5/PGF/COL4A2/CYP1B1/THY1/ANTXR1/ABCC3/CYBRD1/ABI3BP/PAPSS2/PPIC/FN1/C3/ADAMTS9/C7/SAMD9L/TNC/CCDC80/COL4A1/TNS1/CLMP/COL1A1/RAI14/PRRX1/ENPP2/LIFR/GPNMB/GJC1/PDLIM5/CHI3L1/FCHO2/CDH11/KCNMA1/A2M/LAMA4/CLU/COL12A1/ARHGEF10
TURASHVILI_BREAST_LOBULAR_CARCINOMA_VS_LOBULAR_NORMAL_UP	TURASHVILI_BREAST_LOBULAR_CARCINOMA_VS_LOBULAR_NORMAL_UP	TURASHVILI_BREAST_LOBULAR_CARCINOMA_VS_LOBULAR_NORMAL_UP	44	0.476462	2.57328	5.32e-06	0.000287914	0.000241827	2850	tags=75%, list=34%, signal=50%	STC2/SYNM/ACTA2/PDK4/PAWR/TOM1L1/CGNL1/CD36/NTRK2/EGFR/TRIM29/PERP/MPPED2/MUC6/MYH11/MYBPC1/CHL1/RYR3/FAM76B/BHLHE41/ID4/ELF5/ITGA2/CA2/PAPOLA/KRT15/CCPG1/HSDL2/LAMP2/CYP2J2/PI15/DST/FMO5
GOMF_DYNEIN_INTERMEDIATE_CHAIN_BINDING	GOMF_DYNEIN_INTERMEDIATE_CHAIN_BINDING	GOMF_DYNEIN_INTERMEDIATE_CHAIN_BINDING	21	0.610435	2.57114	7.29e-06	0.000375759	0.000315611	1445	tags=62%, list=17%, signal=51%	DYNC2H1/DNAH5/DYNLT3/DNAH8/DNAH14/DNAH10/DNAH6/DNAH2/DYNLL2/DNAH7/DNAH9/TRIM58/DNAH11
HOELZEL_NF1_TARGETS_UP	HOELZEL_NF1_TARGETS_UP	HOELZEL_NF1_TARGETS_UP	58	0.444971	2.5687	1.15e-06	7.15e-05	6.01e-05	1952	tags=53%, list=23%, signal=41%	GAP43/PAPPA/TENT5A/SLC41A2/GSAP/TNIK/HHIP/ENDOD1/B4GALT6/FAS/HSPA4L/DRAM1/MAP2/ARHGAP36/PLK2/CEBPB/MET/OSBPL3/LURAP1L/SYT14/RELN/PDLIM5/FAM199X/KCNH8/SESN3/IFI16/SCN9A/ITGA2/HGF/NAV1/LIMS1
IBRAHIM_NRF2_UP	IBRAHIM_NRF2_UP	IBRAHIM_NRF2_UP	226	0.32759	2.56085	1e-10	1.8e-08	1.52e-08	3082	tags=59%, list=37%, signal=38%	NCOA7/TMTC1/ABCB1/SLC35F2/SLC41A2/MERTK/SERPINE2/SYNJ2/CFAP97/ME1/MEF2A/GOLGA4/RPS6KB1/CCDC47/SPP1/DNAJB4/LUCAT1/ACBD3/MAP2/TLK2/MAN1A2/SUCO/ZRANB2/PPIL4/AKR1B10/RAB21/DNAJC7/NUCB2/TMED7/RRAS2/TMED5/SLC6A15/SGTB/PGGT1B/RAB18/RCN1/GNA13/ZBTB41/CCDC59/TNFRSF1A/SSB/SLU7/SAMD8/CMPK1/RPAP3/CEP290/ACAP2/DNAJC3/LIFR/PHAX/GTF3C3/SRP54/ESF1/TMED2/TM9SF3/SCFD1/CSGALNACT2/ABCC4/PSMD12/DGKG/CSNK1G3/CCSAP/SPT…
GABRIELY_MIR21_TARGETS	GABRIELY_MIR21_TARGETS	GABRIELY_MIR21_TARGETS	121	0.370613	2.55717	2.23e-08	2.18e-06	1.83e-06	3765	tags=79%, list=45%, signal=44%	DDAH1/TENT5A/GOLGA4/TLCD4/SESN1/LIN7C/PRRC1/CYBRD1/ZNF326/PTBP3/ITSN2/MYEF2/TSNAX/UTRN/TRIM38/PTPN3/OSBPL3/VPS36/SMC5/MGAT4A/GTF2A1/KLF5/RAI14/RAB22A/MINDY2/ARID4A/ACAP2/LIFR/TTC33/STAT3/REV3L/EIF2AK3/EPHA4/PHF20L1/ETNK1/PARP9/NEK7/RASEF/SEC63/LYRM7/PALLD/GNAQ/ACTR2/ZMYM2/LNPK/SREK1/CEMIP2/LCORL/TRIM33/DOCK10/ANO3/MAP3K2/CPEB3/FOXN3/SRSF11/RSF1/CLOCK/LPGAT1/FAM3C/B3GALNT1/DDX46/YOD1/PIK3C2A/RASGR…
MACAEVA_PBMC_RESPONSE_TO_IR	MACAEVA_PBMC_RESPONSE_TO_IR	MACAEVA_PBMC_RESPONSE_TO_IR	63	0.427868	2.55366	2.58e-06	0.000146023	0.000122649	1032	tags=37%, list=12%, signal=32%	CMBL/PPM1D/ITPR2/F5/RRM2B/FAS/EDA2R/ACTA2/DENND2D/ZMAT3/PCNP/ARHGEF3/SESN1/SPATA18/MDM2/PLK2/TP53INP1/NSF/GLS2/TMEM30A/ASCC3/PPP4R3A/PYHIN1
LEE_NEURAL_CREST_STEM_CELL_DN	LEE_NEURAL_CREST_STEM_CELL_DN	LEE_NEURAL_CREST_STEM_CELL_DN	59	0.442638	2.55031	1.63e-06	9.88e-05	8.3e-05	2121	tags=61%, list=25%, signal=46%	NELL2/ENPP4/TMEM255A/HSPA4L/ZMAT3/ZBBX/NOS2/TTYH1/PLK2/EPHA2/HLA-B/EFEMP1/FBN2/COL4A6/PRR16/DSP/QKI/MPPED2/CEP290/NAV3/PDLIM5/SLITRK5/RIPPLY3/SPON1/TRIM22/PMAIP1/CROT/FUT8/GRAMD1C/BTG3/PALLD/CREB5/DTNA/ZMYM2/CA2/CNTNAP2
DUTERTRE_ESTRADIOL_RESPONSE_24HR_DN	DUTERTRE_ESTRADIOL_RESPONSE_24HR_DN	DUTERTRE_ESTRADIOL_RESPONSE_24HR_DN	231	0.323122	2.54845	1e-10	1.8e-08	1.52e-08	2130	tags=46%, list=26%, signal=35%	NCOA7/IFIT5/ALCAM/NECTIN4/GSAP/SYTL2/RGL1/PARP12/CAMK2N1/FZD2/ME1/GOLGA4/TGFBI/GALNT10/LMO7/FAM171B/LARP6/GRB14/TSC22D3/DRAM1/CCDC186/PAWR/MAP2/SEC62/MYO6/LPCAT2/LYSMD3/PCTP/CCSER1/ABCC3/PLK2/TP53INP1/SMAD3/PLA2R1/EPB41L2/ITSN2/BCAS1/TRIM5/SLC4A7/UACA/TAX1BP1/FBN2/FN1/NAMPT/DOCK11/SKIL/PLIN2/CSRP1/TMEM30A/VTCN1/CEACAM6/KIF3A/PGM5/QKI/SAMD4A/IRF6/MGAT4A/DDX60/GUCY1A2/KLF5/ZNF217/TFPI/CAST/ADGRG6/K…
COLIN_PILOCYTIC_ASTROCYTOMA_VS_GLIOBLASTOMA_DN	COLIN_PILOCYTIC_ASTROCYTOMA_VS_GLIOBLASTOMA_DN	COLIN_PILOCYTIC_ASTROCYTOMA_VS_GLIOBLASTOMA_DN	15	0.691817	2.54374	6.34e-06	0.000336031	0.000282242	1451	tags=73%, list=17%, signal=61%	TGFBI/SPP1/ZFAND6/FN1/PLIN2/EGFR/PRRX1/GPNMB/ANXA2/CHI3L1/A2M
BOYLAN_MULTIPLE_MYELOMA_PCA1_UP	BOYLAN_MULTIPLE_MYELOMA_PCA1_UP	BOYLAN_MULTIPLE_MYELOMA_PCA1_UP	39	0.485921	2.54175	1.24e-05	0.000579755	0.000486953	2414	tags=69%, list=29%, signal=49%	ITGA1/ALCAM/TGFBI/DDX3Y/PAWR/ABI3BP/VAV3/F2RL1/PLSCR1/RMDN2/HOOK1/C3/MPO/PRLR/SPAG6/OSBPL3/TENT5C/ELL2/XDH/SPON1/IFI16/GRAMD1C/STAT4/ITK/CPEB3/B3GALNT1/SCART1
DEBIASI_APOPTOSIS_BY_REOVIRUS_INFECTION_UP	DEBIASI_APOPTOSIS_BY_REOVIRUS_INFECTION_UP	DEBIASI_APOPTOSIS_BY_REOVIRUS_INFECTION_UP	126	0.361349	2.50551	3.83e-08	3.49e-06	2.93e-06	3759	tags=79%, list=45%, signal=44%	FGF2/IFIT5/TRIM21/GNAI1/H1-0/ATXN3/PAWR/CD2AP/BLZF1/RAB21/UBE2D1/PLSCR1/CEBPB/RRAS2/PRKAA1/MOB4/PSMB9/CCP110/GNA13/DNAJC2/ATF1/TLK1/ZNF217/PTPN2/CAP2/SHOC2/CDC27/SIKE1/DCTN6/TAP1/TRIM22/PMAIP1/MED21/NEK7/IFI16/BRCA1/GADD45A/BTG3/COPS2/ID4/SMNDC1/RAB5A/SP100/CREB5/DTNA/ATF3/GNAQ/RYBP/SYF2/UBE2V2/ANAPC10/HRK/TGDS/NR1D2/FXR1/CPEB3/PFDN4/SMAD5/WASL/EIF4E/ARHGAP5/STK17B/KPNA5/PDE4D/SHOX2/MAP4K5/WASHC4…
GOMF_MINUS_END_DIRECTED_MICROTUBULE_MOTOR_ACTIVITY	GOMF_MINUS_END_DIRECTED_MICROTUBULE_MOTOR_ACTIVITY	GOMF_MINUS_END_DIRECTED_MICROTUBULE_MOTOR_ACTIVITY	13	0.705916	2.49381	8.59e-06	0.000424239	0.00035633	1445	tags=85%, list=17%, signal=70%	DYNC2H1/DNAH5/DNAH8/DNAH14/DNAH10/DNAH6/DNAH12/DNAH2/DNAH7/DNAH9/DNAH11
TAKEDA_TARGETS_OF_NUP98_HOXA9_FUSION_6HR_UP	TAKEDA_TARGETS_OF_NUP98_HOXA9_FUSION_6HR_UP	TAKEDA_TARGETS_OF_NUP98_HOXA9_FUSION_6HR_UP	29	0.532268	2.48842	1.49e-05	0.000673937	0.000566059	2565	tags=72%, list=31%, signal=50%	PTPN13/PCOLCE2/GNAI1/NME7/SCN2A/CEP70/KMO/CMAHP/KLF5/USP32/PLCL1/HOXB3/PDE4DIP/FBXO22/DACH1/GLIPR1/STAT4/PCDH17/GAS2L3/SLC25A36/PLA2G4A
RICKMAN_HEAD_AND_NECK_CANCER_E	RICKMAN_HEAD_AND_NECK_CANCER_E	RICKMAN_HEAD_AND_NECK_CANCER_E	14	0.689567	2.48498	8.19e-06	0.000414423	0.000348085	1465	tags=79%, list=18%, signal=65%	HLF/MUC4/SUSD4/ADGRF1/FBN2/NTRK2/VTCN1/FMO2/GDA/NPR3/A2ML1
KATSANOU_ELAVL1_TARGETS_UP	KATSANOU_ELAVL1_TARGETS_UP	KATSANOU_ELAVL1_TARGETS_UP	78	0.394239	2.48209	1.47e-06	8.99e-05	7.55e-05	1442	tags=40%, list=17%, signal=33%	ANKRD44/TMTC1/ABLIM1/CMBL/RARB/SYTL2/PITX2/FAS/TXNIP/RGS5/IL2RG/SNCG/PRSS35/PLEKHH2/SCUBE3/LPCAT2/MIR4435-2HG/FAM177A1/TRIM5/BMP4/IGF1/DSP/MMP2/ALKAL1/CDKL3/MYH11/PCGF5/HMCN1/PLOD2/EPHA4/MOGAT2
NUYTTEN_NIPP1_TARGETS_UP	NUYTTEN_NIPP1_TARGETS_UP	NUYTTEN_NIPP1_TARGETS_UP	320	0.297587	2.47702	1e-10	1.8e-08	1.52e-08	2829	tags=53%, list=34%, signal=37%	NCOA7/REPS2/PPM1K/IFIT5/KITLG/SLC35F2/CNRIP1/TNIK/GCC2/FLRT3/PARP12/ERAP1/PCOLCE2/ENDOD1/GOLGA4/SLC25A27/DNAJB4/PIP4P2/DYNLT3/TLE4/TMEM106B/LUC7L3/LARP6/ISL1/FAM241A/NFIA/COL4A2/SLC22A5/DNAH14/KCNJ8/SPTSSA/DRAM1/NECTIN3/SPEF2/SMURF2/FSD2/PPIL4/PCTP/ESCO1/RGS4/TRIM5/EFEMP1/TSNAX/PLSCR1/AEBP2/CARNMT1/PPIC/IL1RAP/ANKRD30B/COL4A6/MAGEH1/SPTLC1/TMED5/PRAME/BEST3/STAC/PROS1/TRIM38/BBS10/IL22RA1/DPY19L2…
GOCC_CORNIFIED_ENVELOPE	GOCC_CORNIFIED_ENVELOPE	GOCC_CORNIFIED_ENVELOPE	12	0.718986	2.466	2.76e-05	0.00113669	0.000954738	2060	tags=92%, list=25%, signal=69%	TCHH/DSP/KRT10/DSG2/CNFN/PPL/DSG1/PKP2/FLG/FLG2/KAZN
GOCC_EXTERNAL_SIDE_OF_PLASMA_MEMBRANE	GOCC_EXTERNAL_SIDE_OF_PLASMA_MEMBRANE	GOCC_EXTERNAL_SIDE_OF_PLASMA_MEMBRANE	122	0.356231	2.46371	9.35e-08	7.91e-06	6.64e-06	1462	tags=38%, list=18%, signal=32%	BTN2A2/ABCB1/ITGA1/GLRA1/ALCAM/SERPINE2/IL12RB2/MFGE8/CA4/BTN3A1/ITGAM/FAS/BTN3A2/IL2RG/THY1/SPN/S1PR1/ANTXR1/HHLA2/HFE/BTN3A3/P2RX7/BTN1A1/PKHD1/B2M/CD302/CD36/TMC1/ITGA11/ITGAX/GFRA1/SCUBE1/PRLR/VTCN1/STAB2/CD200R1/CD84/MICA/CDH13/LIFR/FCRL6/BTN2A3P/EPHA5/CD34/MICB/ABCC4
JOHNSTONE_PARVB_TARGETS_3_DN	JOHNSTONE_PARVB_TARGETS_3_DN	JOHNSTONE_PARVB_TARGETS_3_DN	363	0.289689	2.45607	1e-10	1.8e-08	1.52e-08	3448	tags=63%, list=41%, signal=39%	ANKRD44/NDFIP2/SNX7/ALCAM/CPNE8/RUNDC3B/CCDC43/SIX1/GPX8/RFK/MOSMO/SKA2/ZCCHC10/HDGFL3/PCNP/SPTSSA/PAWR/SUCO/SMURF2/RAMAC/SASS6/BLZF1/POU4F2/LYSMD3/PWRN1/RNF138/DLEU2/ZNF652/PTBP3/TAX1BP1/HMGN5/PLSCR1/AEBP2/CARNMT1/CEP70/NUCB2/TMED7/IPMK/SGTB/PGGT1B/SP2-AS1/RAB18/CBX1/BROX/DCUN1D1/OTUD6B-AS1/PSIP1/FILIP1/CISD2/KRT10/TIPRL/KIF20B/AGBL3/QKI/ACTN1/OTUD6B/RAB33B/SENP7/ACAP2/CAST/DNAJC3/EME1/MYSM1/FBX…
MANNE_COVID19_COMBINED_COHORT_VS_HEALTHY_DONOR_PLATELETS_DN	MANNE_COVID19_COMBINED_COHORT_VS_HEALTHY_DONOR_PLATELETS_DN	MANNE_COVID19_COMBINED_COHORT_VS_HEALTHY_DONOR_PLATELETS_DN	86	0.38265	2.44724	7.79e-07	5.11e-05	4.29e-05	2100	tags=50%, list=25%, signal=38%	PAPPA/ERC2/TMEM150C/KCTD12/TGFBI/COL25A1/MINAR1/COL15A1/FAM241A/COL4A2/SHTN1/SETD7/DNAH12/LYSMD3/MAPK10/DCDC2/HECW2/UTRN/LRRCC1/PREX2/AGBL3/COL4A1/CLIC5/TNS1/HLA-DMB/ADAM12/SMIM36/STXBP6/CD34/CPAMD8/A2M/PLD4/ANKRD55/PLCL1/CPNE4/STK26/RASEF/FAM71F1/AFF3/WDFY4/DACH1/HLA-DOA/CA2
SMID_BREAST_CANCER_LUMINAL_B_DN	SMID_BREAST_CANCER_LUMINAL_B_DN	SMID_BREAST_CANCER_LUMINAL_B_DN	189	0.31975	2.44571	5.52e-09	6.23e-07	5.23e-07	1504	tags=39%, list=18%, signal=32%	PDPN/SYNM/SERPINE2/IL12RB2/DOCK2/CRABP1/ST8SIA1/PCOLCE2/MFGE8/HSD17B2/FAS/DNAJB4/BTN3A2/IL2RG/COL4A2/GRB14/CYP1B1/PAX6/FNDC4/RIPOR2/TTYH1/PAPSS2/AKR1B10/EPB41L2/DNM3/EFEMP1/MUC16/RASGRP2/DTX4/PLIN1/C3/IGF1/RRAS2/SLC6A15/PROS1/EGFR/TRIM29/LTBP1/SELL/TCEAL2/C7/LYVE1/CHI3L2/TNC/FRZB/MET/PERP/FMO2/SVEP1/CD38/MPPED2/ADH1B/FAT1/KLF5/ABCA8/MRC1/TFPI/BIN2/ADGRG6/KYNU/ENPP2/MYH11/PECAM1/ANP32E/CHI3L1/NMU/…
GAUSSMANN_MLL_AF4_FUSION_TARGETS_E_UP	GAUSSMANN_MLL_AF4_FUSION_TARGETS_E_UP	GAUSSMANN_MLL_AF4_FUSION_TARGETS_E_UP	43	0.455928	2.44315	2.07e-05	0.000893749	0.000750685	1706	tags=49%, list=20%, signal=39%	HDAC9/FLRT3/KCTD12/SERPINB6/TGFBI/PLB1/GRB14/ZC2HC1A/ASB5/COLEC12/PROCR/SVEP1/CDH11/CD34/NIPAL4/PMAIP1/BVES/CLU/CYP7B1/PPIG/ID4
GOBP_ACID_SECRETION	GOBP_ACID_SECRETION	GOBP_ACID_SECRETION	20	0.589826	2.44091	4.7e-05	0.00177956	0.0014947	1471	tags=60%, list=18%, signal=50%	ABCB4/SNX10/CCKBR/DRD2/PTGER3/ABAT/P2RX7/PRKAA1/SLC26A7/SLC6A1/TRH/CHRM5
HP_ABNORMAL_SPUTUM	HP_ABNORMAL_SPUTUM	HP_ABNORMAL_SPUTUM	42	0.456148	2.43652	2.17e-05	0.000917034	0.000770242	2371	tags=57%, list=28%, signal=41%	F5/ERAP1/FAS/DNAH5/ACTA2/SPEF2/SMAD3/HLA-B/HEY2/CFTR/CFAP221/DNAH9/SPAG1/MYH11/DNAAF4/DNAH11/TLL1/DRC1/MFAP5/STAT4/HLA-DPA1/CCDC65/HLA-DPB1/MLX
GOCC_AXONEMAL_DYNEIN_COMPLEX	GOCC_AXONEMAL_DYNEIN_COMPLEX	GOCC_AXONEMAL_DYNEIN_COMPLEX	10	0.755169	2.42735	3.22e-05	0.00130221	0.00109377	1523	tags=90%, list=18%, signal=74%	DNAH5/DNAH8/DNAH14/DNAH6/DNAH2/DNAH7/CFAP70/DNAH9/DRC1
RIGGINS_TAMOXIFEN_RESISTANCE_DN	RIGGINS_TAMOXIFEN_RESISTANCE_DN	RIGGINS_TAMOXIFEN_RESISTANCE_DN	89	0.378891	2.42673	1.89e-06	0.000111777	9.39e-05	3521	tags=73%, list=42%, signal=43%	KIF5C/TIMP1/IFIT5/ALCAM/STC2/GSAP/PDLIM3/GREB1/HSPA4L/CNR1/ABAT/CYP1B1/SHTN1/VAV3/CD302/NAMPT/TCEAL9/DSP/DSG2/TESMIN/EIF2AK2/UPF3B/DDX60/FAT1/ZNF217/RAI14/PDLIM5/NEDD9/PMAIP1/PTPN12/CD47/PALLD/PLCB4/ESR1/SLC1A1/PAPOLA/INSIG2/TMEM123/MRPS30/RBMS1/AP1AR/WAC/ZNF148/UBE2K/SLTM/LAMP2/MAP3K7/MYOF/RBPJ/SMARCA5/SLC35A3/SLC39A6/IL6ST/NFU1/SEMA3C/CLK1/RANBP2/THAP9-AS1/RETREG1/MXI1/PHTF2/OAS1/SLC5A3/NFYB/PM…
HALLMARK_INTERFERON_ALPHA_RESPONSE	HALLMARK_INTERFERON_ALPHA_RESPONSE	HALLMARK_INTERFERON_ALPHA_RESPONSE	39	0.462926	2.42147	4.21e-05	0.00161751	0.00135859	1736	tags=54%, list=21%, signal=43%	NCOA7/TENT5A/PARP12/TRIM21/TXNIP/DHX58/PSMB8/B2M/TRIM5/HLA-C/PLSCR1/PSMB9/SELL/SAMD9L/PROCR/EIF2AK2/DDX60/TAP1/PARP9/CD74/CD47
SCHAEFFER_PROSTATE_DEVELOPMENT_6HR_UP	SCHAEFFER_PROSTATE_DEVELOPMENT_6HR_UP	SCHAEFFER_PROSTATE_DEVELOPMENT_6HR_UP	63	0.405441	2.41981	1.26e-05	0.00058828	0.000494113	2716	tags=62%, list=33%, signal=42%	NDFIP2/QPCT/RPS6KB1/SESN1/SMURF2/RAMAC/COLEC12/B2M/FAM177A1/DOCK11/LHX6/SPRYD7/EGFR/SMPDL3A/AGBL3/SBDS/EIF2AK2/CASP4/CFTR/CAST/CCDC126/TREM2/MED21/PDCD10/SGCE/UBE2V2/C8orf34/ATRNL1/PTEN/KTN1/B3GALNT1/TBC1D8B/SYNPR/PSMC6/SSR1/SPOPL/GFPT1/AOC3/VEGFD
TURASHVILI_BREAST_DUCTAL_CARCINOMA_VS_LOBULAR_NORMAL_DN	TURASHVILI_BREAST_DUCTAL_CARCINOMA_VS_LOBULAR_NORMAL_DN	TURASHVILI_BREAST_DUCTAL_CARCINOMA_VS_LOBULAR_NORMAL_DN	29	0.514651	2.40606	4.1e-05	0.00158596	0.00133209	2112	tags=66%, list=25%, signal=49%	SYNM/TMEM150C/FAM126A/PAK3/SORBS1/CRISPLD1/SYNPO2/NTRK2/ADH1B/MYH11/AK5/OXR1/ID4/ATP10D/ELF5/ATF3/SENP6/ATP1A2/CX3CL1
GOBP_INOSITOL_LIPID_MEDIATED_SIGNALING	GOBP_INOSITOL_LIPID_MEDIATED_SIGNALING	GOBP_INOSITOL_LIPID_MEDIATED_SIGNALING	68	0.394306	2.39465	1.18e-05	0.000560097	0.000470441	1878	tags=49%, list=22%, signal=38%	BTN2A2/FGF2/MYO16/PTPN13/SERPINE2/PLCB2/RPS6KB1/BECN1/KCNH1/EGF/NTRK3/F2RL1/FN1/IGF1/NTRK2/ERBB4/EGFR/PREX2/PDGFC/CD160/RELN/PLCD3/ERBB3/PIK3CB/NPR3/CSF1R/TREM2/PLCL1/PTAFR/PEAR1/PLCB4/HGF/DIPK2A
GOZGIT_ESR1_TARGETS_DN	GOZGIT_ESR1_TARGETS_DN	GOZGIT_ESR1_TARGETS_DN	336	0.284302	2.39453	1e-10	1.8e-08	1.52e-08	2140	tags=43%, list=26%, signal=33%	NELL2/TMTC1/HDAC9/ABLIM1/CMBL/TIMP1/MLLT3/PPM1K/PTPN13/KITLG/ZNF483/TENT5A/ALCAM/TRPS1/FAM169A/STC2/SYTL2/TMEM150C/FLRT3/RUNDC3B/ST6GALNAC5/SIPA1L2/GREB1/TGFBI/DYNLT3/HS6ST2/TRIQK/BMPR1B/FAM241A/HDGFL3/ABAT/LIN7A/CYP1B1/ZC2HC1A/TSC22D3/MLPH/PRSS35/MAP2/SMURF2/MYO6/VMP1/FOXA1/SUSD4/PLK2/PAPSS2/MAN1A1/PSMB8/SYNPO2/DNM3/BCAS1/SLC9A7/VAV3/DCDC2/EFEMP1/NME7/NUDT16/ARFGEF3/FAXDC2/MASP1/NUCB2/RNF43/GFRA…
CHIANG_LIVER_CANCER_SUBCLASS_CTNNB1_UP	CHIANG_LIVER_CANCER_SUBCLASS_CTNNB1_UP	CHIANG_LIVER_CANCER_SUBCLASS_CTNNB1_UP	69	0.389534	2.39057	5.29e-06	0.000287676	0.000241627	1366	tags=38%, list=16%, signal=32%	SALL1/CTNNA2/ITPR2/HLF/FAM169A/MERTK/TMEM150C/RUNDC3B/DPP4/ZNF385B/FAS/PDK4/GNAI1/EXPH5/KCNJ8/ANKFN1/BMP4/CD36/GFRA1/SPRYD7/SLC6A12/UBXN10/CCDC170/CAP2/DSG1/PHYHIPL
WINTER_HYPOXIA_DN	WINTER_HYPOXIA_DN	WINTER_HYPOXIA_DN	19	0.59058	2.38745	7.26e-05	0.00248611	0.00208815	1196	tags=63%, list=14%, signal=54%	ANKRD44/ABCB1/DOCK2/LMO2/RGS5/IL16/RIPOR2/SYNPO2/PARM1/INPP5D/FRZB/ENPP2
HUANG_DASATINIB_SENSITIVITY_UP	HUANG_DASATINIB_SENSITIVITY_UP	HUANG_DASATINIB_SENSITIVITY_UP	44	0.441865	2.38643	5.34e-05	0.00195385	0.00164109	1384	tags=50%, list=17%, signal=42%	KCTD12/TGFBI/BTN3A2/LARP6/CDC42EP3/BTN3A3/PSMB8/EPHA2/F2RL1/POPDC3/INPP1/EGFR/PSMB9/SAMD9L/PDGFC/MET/RAI14/TFPI/CAST/FXYD5/ELK3/ELL2
KERLEY_RESPONSE_TO_CISPLATIN_UP	KERLEY_RESPONSE_TO_CISPLATIN_UP	KERLEY_RESPONSE_TO_CISPLATIN_UP	27	0.51671	2.38559	9.39e-05	0.0031174	0.00261839	1642	tags=52%, list=20%, signal=42%	PPM1D/FAS/ACTA2/ZMAT3/STK17A/SESN1/DRAM1/PLK2/GLS2/INPP5D/PROCR/PLAT/TRIM22/GADD45A
CERVERA_SDHB_TARGETS_2	CERVERA_SDHB_TARGETS_2	CERVERA_SDHB_TARGETS_2	50	0.427302	2.36888	1.48e-05	0.000673937	0.000566059	1787	tags=48%, list=21%, signal=38%	HDAC9/HOMER2/FAT3/ITPR2/F5/SERPINE2/PCOLCE2/SIPA1L2/STK17A/SCG5/SUSD4/PKHD1/FBN2/IL1RAP/VGLL3/ESRP1/ELOVL6/PRRX1/SH3BGRL/MICB/A2M/TF/DDC/CREB5
GOMF_DYNEIN_LIGHT_INTERMEDIATE_CHAIN_BINDING	GOMF_DYNEIN_LIGHT_INTERMEDIATE_CHAIN_BINDING	GOMF_DYNEIN_LIGHT_INTERMEDIATE_CHAIN_BINDING	20	0.572359	2.36862	0.000111989	0.00353532	0.00296941	1445	tags=60%, list=17%, signal=50%	DYNC2H1/DNAH5/DNAH8/DNAH14/DNAH10/DNAH6/DNAH2/DYNLL2/HOOK1/DNAH7/DNAH9/DNAH11
ONDER_CDH1_TARGETS_2_UP	ONDER_CDH1_TARGETS_2_UP	ONDER_CDH1_TARGETS_2_UP	126	0.34087	2.36351	4.95e-07	3.48e-05	2.92e-05	1399	tags=36%, list=17%, signal=30%	REPS2/MLLT3/DDAH1/STC2/SYNM/RGL1/CDH18/PCOLCE2/FZD2/RIMS1/GALNT10/DNAJB4/ACTA2/LIN7A/CYP1B1/THY1/TSC22D3/SCG5/MLPH/TRPA1/PPM1H/NECTIN3/COL6A3/ITGBL1/CYBRD1/RGS4/FN1/MAGEH1/PRR16/MMP2/LTBP1/RGS17/COL1A1/ADAM12/ABCA8/TFPI/NID2/PRRX1/ENPP2/NRP1/SEMA5A/PLOD2/CDH11/SLITRK5/KCNMA1
KEGG_COMPLEMENT_AND_COAGULATION_CASCADES	KEGG_COMPLEMENT_AND_COAGULATION_CASCADES	KEGG_COMPLEMENT_AND_COAGULATION_CASCADES	16	0.631941	2.36122	3.95e-05	0.00153979	0.00129331	1754	tags=69%, list=21%, signal=54%	F5/C5/MASP1/C3/PROS1/C7/PLAT/TFPI/C8A/A2M/F13A1
GOBP_FERTILIZATION	GOBP_FERTILIZATION	GOBP_FERTILIZATION	39	0.451237	2.36032	7.68e-05	0.00260658	0.00218934	1216	tags=44%, list=15%, signal=37%	NELL2/GLRA1/MFGE8/SPESP1/RIMS1/PLB1/TRPC3/APOB/NECTIN3/ZAN/NPM2/ATP1A4/CCDC136/PLAT/ADAM5/ADAM32/SPAG1
FOSTER_KDM1A_TARGETS_UP	FOSTER_KDM1A_TARGETS_UP	FOSTER_KDM1A_TARGETS_UP	87	0.369404	2.35827	3.51e-06	0.00019584	0.000164492	1675	tags=44%, list=20%, signal=35%	SNCA/MLLT3/QPCT/CRABP1/PCOLCE2/RIMS1/TNNT1/PPP2R2C/CPNE2/THY1/MAP2/SLC26A4/MANSC1/BCAS1/USP29/SYT5/POPDC3/SH3RF2/HECW2/NTRK2/SLC4A5/MMP2/SLC6A13/STK32A/SCML2/RELN/SLC15A2/PRICKLE1/FXYD5/MGST2/CHI3L1/ERICH6/CALCOCO2/MOGAT2/HSH2D/BBS7/TAF1D/CD74
DUTERTRE_ESTRADIOL_RESPONSE_6HR_DN	DUTERTRE_ESTRADIOL_RESPONSE_6HR_DN	DUTERTRE_ESTRADIOL_RESPONSE_6HR_DN	42	0.439604	2.34814	5.26e-05	0.00194437	0.00163313	1554	tags=45%, list=19%, signal=37%	ALCAM/GALNT10/LMO7/NR3C1/FAM171B/GRB14/DRAM1/TP53INP1/PLA2R1/EFEMP1/UACA/ERBB4/UTRN/PLIN2/IRF6/TFPI/KYNU/PARP9/SESN3
WP_PLURIPOTENT_STEM_CELL_DIFFERENTIATION_PATHWAY	WP_PLURIPOTENT_STEM_CELL_DIFFERENTIATION_PATHWAY	WP_PLURIPOTENT_STEM_CELL_DIFFERENTIATION_PATHWAY	14	0.650643	2.34471	4.3e-05	0.00164452	0.00138127	2120	tags=79%, list=25%, signal=59%	FGF2/KITLG/EGF/BMP4/IGF1/FGF1/CSF1R/TF/TPO/HGF/WNT2B
PLASARI_TGFB1_TARGETS_10HR_DN	PLASARI_TGFB1_TARGETS_10HR_DN	PLASARI_TGFB1_TARGETS_10HR_DN	110	0.34688	2.34299	1.68e-06	0.000101315	8.51e-05	2143	tags=51%, list=26%, signal=38%	ABLIM1/REPS2/MLLT3/KITLG/RARB/TRPS1/HMMR/MED12L/SERPINB6/SIX1/TRIM21/PDK4/LMO7/NFIA/ARHGAP18/CYP1B1/SESN1/PRSS35/MAP2/PLEKHH2/MAN1A1/CD36/IGF1/SERPINB9/LRRCC1/MPPED2/EIF2AK2/ELOVL6/MALAT1/TCEA3/MRC1/ADGRG6/PRRX1/LIFR/PDE1A/SH3BGRL/NPR3/LAMA4/EYA1/PARP9/SESN3/CYP7B1/DDC/CNKSR3/FMNL2/MEF2C/LGR4/PDP1/RNASEL/THSD7A/RSPO2/MBNL3/NR1D2/TRIM37/PRIM1/PTEN
GOBP_POSITIVE_CHEMOTAXIS	GOBP_POSITIVE_CHEMOTAXIS	GOBP_POSITIVE_CHEMOTAXIS	21	0.556265	2.34298	0.000143411	0.00427784	0.00359307	2351	tags=81%, list=28%, signal=58%	FGF2/PGF/S1PR1/IL16/SMAD3/NTRK3/F2RL1/BMP4/MET/CDH13/NRP1/GPNMB/SEMA5A/ITGA2/HGF/CX3CL1/KDR
RODRIGUES_THYROID_CARCINOMA_ANAPLASTIC_UP	RODRIGUES_THYROID_CARCINOMA_ANAPLASTIC_UP	RODRIGUES_THYROID_CARCINOMA_ANAPLASTIC_UP	307	0.282351	2.34133	8.57e-10	1.22e-07	1.03e-07	3677	tags=67%, list=44%, signal=39%	HDAC9/DYNC2H1/STC2/SYTL2/HMMR/FAM126A/ST6GALNAC5/SCAMP1/GPX8/RPS6KB1/FAS/MPHOSPH10/SKA2/ATXN3/OSBPL10/STK17A/CDC42EP3/AIMP1/BLZF1/PLK2/CHML/PTBP3/NME7/PLSCR1/ARNTL2/IL1RAP/FN1/NAMPT/DNAJC13/ITGA11/RRAS2/PRKAA1/MOB4/RUNX2/TMEM30A/EGFR/DCUN1D1/ADORA2B/ASCC3/MITD1/INHBE/TNC/H2BC19P/DSG2/KIF20B/C5orf24/DKK3/SSB/ZNF138/ELOVL6/TLK1/CASP4/RPAP3/ACAP2/CAST/FRMD5/ESF1/SIKE1/OXR1/ANXA2/ZNF675/KLHL5/SLFN5/X…
REACTOME_INTRA_GOLGI_TRAFFIC	REACTOME_INTRA_GOLGI_TRAFFIC	REACTOME_INTRA_GOLGI_TRAFFIC	21	0.555581	2.3401	0.000145995	0.00433105	0.00363777	2010	tags=67%, list=24%, signal=51%	MAN1A2/MAN1A1/GOLGA5/CYTH3/NSF/RAB33B/CYTH4/TRIP11/GOSR2/RAB39A/NAPG/COG3/MAN2A2/GOLIM4
TAKEDA_TARGETS_OF_NUP98_HOXA9_FUSION_8D_DN	TAKEDA_TARGETS_OF_NUP98_HOXA9_FUSION_8D_DN	TAKEDA_TARGETS_OF_NUP98_HOXA9_FUSION_8D_DN	77	0.372879	2.33835	1.04e-05	0.000495525	0.000416205	1973	tags=47%, list=24%, signal=36%	MSC-AS1/F5/SLC41A2/ALOX5/ST8SIA1/ST6GALNAC5/ME1/TM6SF1/ITGAM/TGFBI/PDK4/ARHGAP18/CDH8/ELOVL7/ANTXR1/COLEC12/GXYLT2/STAC/CEACAM6/CD200R1/MRC1/DNAJC3/CCDC126/NRP1/GPNMB/CHI3L1/KCNMA1/ETNK1/CAMK1D/CLU/CXCL3/ATP10D/CREB5/SRPX/ZMYM2/DACH1
GOBP_RESPONSE_TO_TEMPERATURE_STIMULUS	GOBP_RESPONSE_TO_TEMPERATURE_STIMULUS	GOBP_RESPONSE_TO_TEMPERATURE_STIMULUS	71	0.377408	2.33806	2.54e-05	0.00106036	0.00089063	1667	tags=44%, list=20%, signal=35%	NGFR/ST8SIA1/RPS6KB1/CHORDC1/SLC25A27/DNAJB4/ATXN3/NOS1/CDH8/TRPA1/ADRB1/RGS7/TP53INP1/DNAJC7/PLIN1/IGF1/PRKAA1/STAC/PSIP1/DNAJC2/MAPT/MICA/SLU7/FGF1/DNAJC3/CD34/EIF2AK3/TRPM3/MICB/MT-CO2/TRPV3
MANNE_COVID19_NONICU_VS_HEALTHY_DONOR_PLATELETS_DN	MANNE_COVID19_NONICU_VS_HEALTHY_DONOR_PLATELETS_DN	MANNE_COVID19_NONICU_VS_HEALTHY_DONOR_PLATELETS_DN	77	0.372761	2.33761	1.04e-05	0.000495525	0.000416205	1829	tags=45%, list=22%, signal=36%	PAPPA/ERC2/TMEM150C/KCTD12/TGFBI/COL25A1/MINAR1/FAM241A/COL4A2/SETD7/DNAH12/LYSMD3/MAPK10/PAPSS2/DCDC2/HMGN5/ZNRF2/UTRN/LRRCC1/AGBL3/COL4A1/CLIC5/TNS1/ADAM12/TRAM1/SH3BGRL/A2M/PLD4/ANKRD55/PLCL1/CPNE4/STK26/FAM71F1/AFF3/SEPTIN7
BLANCO_MELO_COVID19_SARS_COV_2_INFECTION_A594_CELLS_UP	BLANCO_MELO_COVID19_SARS_COV_2_INFECTION_A594_CELLS_UP	BLANCO_MELO_COVID19_SARS_COV_2_INFECTION_A594_CELLS_UP	31	0.481474	2.3366	8.18e-05	0.00276014	0.00231832	2257	tags=68%, list=27%, signal=50%	STC2/TM6SF1/EXPH5/TSC22D3/SCG5/MAP2/FUT1/RASGRP2/SLC6A15/RUNX2/INHBE/KCNQ3/SLFN5/RAB39B/ATF3/ALDH1L2/ZMAT1/ULBP1/PARP8/RBMS3/PCDH1
ZHAN_MULTIPLE_MYELOMA_PR_DN	ZHAN_MULTIPLE_MYELOMA_PR_DN	ZHAN_MULTIPLE_MYELOMA_PR_DN	22	0.539916	2.33504	0.000133995	0.00405279	0.00340405	400	tags=32%, list=5%, signal=30%	ANKRD44/FGF2/PPM1K/ALCAM/NR3C2/ARHGAP18/MAP2
SMID_BREAST_CANCER_NORMAL_LIKE_UP	SMID_BREAST_CANCER_NORMAL_LIKE_UP	SMID_BREAST_CANCER_NORMAL_LIKE_UP	166	0.317922	2.33387	6.12e-08	5.35e-06	4.49e-06	2058	tags=46%, list=25%, signal=36%	ABLIM1/MAP7D3/ABCB1/SYNM/DOCK2/KCTD12/PLCB2/DPP4/SORBS1/NR3C2/BTN3A2/TXNIP/ACTA2/TLE4/RGS5/IL2RG/SLIT3/CYP1B1/SKAP2/FNDC4/RIPOR2/BTN3A3/EFEMP1/RASGRP2/CD302/C3/IGF1/SPINK5/NTRK2/PROS1/SELL/C7/LYVE1/FRZB/MET/FMO2/AIF1/SP140/SVEP1/CD38/CYLD/ADH1B/PDE2A/ABCA8/MRC1/TFPI/NPR1/BIN2/RELN/ENPP2/MYH11/PECAM1/CHL1/CHI3L1/COL17A1/LILRB3/LCK/EPHA4/LAMA4/NLRP1/VAMP5/TF/CLU/IFI16/TRAF3IP3/CD74/ID4/F13A1/SRPX/H…
CHIARADONNA_NEOPLASTIC_TRANSFORMATION_KRAS_CDC25_DN	CHIARADONNA_NEOPLASTIC_TRANSFORMATION_KRAS_CDC25_DN	CHIARADONNA_NEOPLASTIC_TRANSFORMATION_KRAS_CDC25_DN	23	0.528856	2.3303	0.000227681	0.00614795	0.00516383	1689	tags=57%, list=20%, signal=45%	ADAM23/FAS/PDK4/CYP1B1/CEBPB/C3/PROS1/TNC/CCDC80/STAT3/LAMA4/IGSF10/BTG3
WANG_SMARCE1_TARGETS_UP	WANG_SMARCE1_TARGETS_UP	WANG_SMARCE1_TARGETS_UP	131	0.329568	2.32235	4.32e-07	3.11e-05	2.62e-05	2137	tags=50%, list=26%, signal=38%	ANKRD44/PTPN13/NEGR1/FLRT3/BOC/SIPA1L2/ME1/CA4/TGFBI/TXNIP/ACTA2/HS6ST2/COL15A1/PRSS35/PAWR/ANTXR1/LPCAT2/CGNL1/COL6A3/CYBRD1/GNG2/ACAN/FN1/TCEAL9/NTRK2/IPMK/PROS1/MMP2/VAT1L/PERP/DSG2/CYLD/COL1A1/PLAT/NID2/PRRX1/LIFR/EDIL3/CHI3L1/HMCN1/SLFN5/SPTLC3/NPR3/MFAP5/COL12A1/ATP10D/PLSCR4/ITGA2/SRPX/TCEAL8/TLCD2/PCDH10/KLHL28/TSHZ2/MCF2L2/LNPK/LIMS1/ALDH1L2/DACH1/CEMIP2/FRY/FBXO32/FRAS1/SDC2/SMIM14
FULCHER_INFLAMMATORY_RESPONSE_LECTIN_VS_LPS_DN	FULCHER_INFLAMMATORY_RESPONSE_LECTIN_VS_LPS_DN	FULCHER_INFLAMMATORY_RESPONSE_LECTIN_VS_LPS_DN	174	0.310753	2.31861	5.24e-08	4.65e-06	3.9e-06	1854	tags=40%, list=22%, signal=32%	NCOA7/IFIT5/CCDC152/TENT5A/CPNE8/KCTD12/ME1/TGFBI/FAS/NR3C1/SPN/CD2AP/VMP1/LYSMD3/DHX58/FRMD4A/SYNPO2/TRIM5/CD302/CD36/NAMPT/DOCK11/ZNRF2/SGTB/PLIN2/TRIM38/C1orf162/RB1/CHI3L2/SAMD9L/AIF1/CD38/OAS3/LACC1/QKI/SAMD4A/CD84/HLA-DMB/SNX2/KLF5/MALAT1/KLF10/ACAP2/CAST/ENPP2/GPNMB/PECAM1/PRICKLE1/SLFN5/FCHO2/XAF1/LILRB3/CALCOCO2/CSGALNACT2/GNB4/TRIM22/VAMP5/STK26/ZNF493/ADGRE2/IFI16/STAB1/FMR1/F13A1/SP10…
WP_COMPLEMENT_AND_COAGULATION_CASCADES	WP_COMPLEMENT_AND_COAGULATION_CASCADES	WP_COMPLEMENT_AND_COAGULATION_CASCADES	13	0.654409	2.31185	0.000109816	0.00348706	0.00292888	1567	tags=69%, list=19%, signal=56%	F5/MASP1/C3/PROS1/C7/PLAT/TFPI/CLTC/CLU
DACOSTA_UV_RESPONSE_VIA_ERCC3_DN	DACOSTA_UV_RESPONSE_VIA_ERCC3_DN	DACOSTA_UV_RESPONSE_VIA_ERCC3_DN	354	0.273085	2.30924	1.14e-10	1.95e-08	1.64e-08	3544	tags=63%, list=42%, signal=38%	KIF5C/FGF2/PTPN13/ALCAM/FAM169A/RGL1/HMMR/GCC2/SYNJ2/SCAMP1/MEF2A/GOLGA4/GNAI1/TLE4/NR3C1/STK39/ACBD3/SKAP2/PAWR/TLK2/CD2AP/NECTIN3/PKN2/SUCO/SPAG9/SMURF2/RGS7/SMAD3/DLEU2/ITSN2/RAB21/SLC4A7/PLSCR1/RAD51C/IL1RAP/NAMPT/DNAJC13/RRAS2/MOB4/VEZF1/MED13/EGFR/ADORA2B/RB1/ASCC3/PIBF1/TIPRL/KIF20B/PNISR/DNAJC2/QKI/SAMD4A/CEP135/SMC5/TLK1/SNX2/FAT1/NPEPPS/PTPN2/KLF10/CAP2/TFPI/ARID4A/ACAP2/ADGRG6/SHOC2/UT…
WANG_MLL_TARGETS	WANG_MLL_TARGETS	WANG_MLL_TARGETS	115	0.338282	2.30918	7.39e-07	4.91e-05	4.12e-05	1816	tags=43%, list=22%, signal=34%	HDAC9/NDNF/CYP2S1/F5/HLF/NEGR1/KCTD12/PITX2/WNK4/TGFBI/KCNA4/PDK4/MINAR1/HS6ST2/LARP6/SLIT3/NFIA/ARHGAP18/RPS6KA6/PAX6/S1PR1/ABI3BP/CACNA1A/PLA2R1/FBN2/SH3RF2/ADORA2B/MMP2/ZCWPW1/FRZB/SVEP1/CCDC80/DKK3/ADH1B/CLMP/GDA/FRMD5/CHI3L1/STXBP6/UGP2/GAL3ST1/TREM2/PTPRM/SNED1/HOXB3/CXCL3/CNKSR3/ANO4/PAX3/ESR1
SAKAI_CHRONIC_HEPATITIS_VS_LIVER_CANCER_DN	SAKAI_CHRONIC_HEPATITIS_VS_LIVER_CANCER_DN	SAKAI_CHRONIC_HEPATITIS_VS_LIVER_CANCER_DN	20	0.556574	2.3033	0.000232628	0.0062195	0.00522393	1816	tags=65%, list=22%, signal=51%	KITLG/IL12RB2/FZD2/MYOG/MAPK10/CEBPB/GRM5/PRKAA1/FRZB/ARID4A/CLU/MFAP5/ESR1
TURASHVILI_BREAST_LOBULAR_CARCINOMA_VS_DUCTAL_NORMAL_DN	TURASHVILI_BREAST_LOBULAR_CARCINOMA_VS_DUCTAL_NORMAL_DN	TURASHVILI_BREAST_LOBULAR_CARCINOMA_VS_DUCTAL_NORMAL_DN	33	0.465334	2.30323	0.000204947	0.00566114	0.00475495	2850	tags=79%, list=34%, signal=52%	STC2/SYNM/FAM126A/KLF8/NR3C2/PDK4/CGNL1/HOOK1/NTRK2/TRIM29/PERP/AK5/MYBPC1/ID4/ELF5/ITGA2/CA2/CX3CL1/CDC37L1/PAPOLA/KRT15/CYP2J2/RIOK3/PI15/DST/FMO5
GOBP_BIOMINERALIZATION	GOBP_BIOMINERALIZATION	GOBP_BIOMINERALIZATION	53	0.410418	2.3025	4.02e-05	0.00155916	0.00130959	1418	tags=45%, list=17%, signal=38%	SNX10/TENT5A/ALOX5/SPP1/BMPR1B/S1PR1/WNT4/P2RX7/SMAD3/FBN2/BMP4/CEBPB/IGF1/NBR1/HEY2/SBDS/WDR72/COL1A1/CFTR/FGF23/TXLNG/KLF10/IFT80/EIF2AK3
BLANCO_MELO_BRONCHIAL_EPITHELIAL_CELLS_INFLUENZA_A_DEL_NS1_INFECTION_UP	BLANCO_MELO_BRONCHIAL_EPITHELIAL_CELLS_INFLUENZA_A_DEL_NS1_INFECTION_UP	BLANCO_MELO_BRONCHIAL_EPITHELIAL_CELLS_INFLUENZA_A_DEL_NS1_INFECTION_UP	250	0.289536	2.30171	6.43e-09	7.11e-07	5.97e-07	1811	tags=39%, list=22%, signal=31%	NCOA7/FGF2/PPM1K/IFIT5/SLC41A2/SYNM/GSAP/TEX14/PARP12/SIX1/DPP4/BTN3A1/TRIM21/RBM11/FAS/SCN3A/BTN3A2/OVOL1/LMO2/TLE4/CASP7/IL16/NECTIN3/CDC42EP3/WNT4/SUSD4/DHX58/BTN3A3/PSMB8/SYNPO2/ADCY4/B2M/HLA-B/TRIM5/HLA-C/MUC16/PLSCR1/BMP4/CEBPB/C3/ZNRF2/CFLAR/HDX/SERPINB9/VEZF1/TRIM38/PSMB9/IL22RA1/SAMD9L/SLC6A12/GNA13/WHAMM/TMEM229B/CD38/SNPH/OAS3/STARD5/NLRC5/CYLD/EIF2AK2/IRF6/IMPA1/KBTBD8/PLAT/TRIM56/KLF…
SCHLOSSER_SERUM_RESPONSE_DN	SCHLOSSER_SERUM_RESPONSE_DN	SCHLOSSER_SERUM_RESPONSE_DN	310	0.277077	2.3012	1.42e-09	1.88e-07	1.58e-07	2766	tags=50%, list=33%, signal=35%	PTPN13/IFIT5/QPCT/TOB1/DOCK2/RUNDC3B/NDUFA5/MEF2A/GOLGA4/RFK/SERPINI2/DYNLT3/PDK4/BECN1/SLIT3/COL4A2/GRB14/NOS1/ABAT/CDH8/CHMP2B/MMD/SPTSSA/CD2AP/NECTIN3/SEC62/AIMP1/COIL/RAP1B/DLEU2/ITSN2/RAB21/RGS4/TAX1BP1/TSNAX/SPTLC1/TMED5/RUNX2/PGGT1B/CBX1/PSIP1/RB1/PIBF1/KMO/EIF2AK2/SMC5/SNX2/CIR1/ZNF217/TRAM1/ARID4A/CAST/COL21A1/OR2H2/SRP54/SUB1/TMED2/ANP32E/DSG1/EPHA5/REV3L/DIS3/DCTN6/DDX5/MICB/PSMD12/BCL…
TURASHVILI_BREAST_DUCTAL_CARCINOMA_VS_DUCTAL_NORMAL_DN	TURASHVILI_BREAST_DUCTAL_CARCINOMA_VS_DUCTAL_NORMAL_DN	TURASHVILI_BREAST_DUCTAL_CARCINOMA_VS_DUCTAL_NORMAL_DN	76	0.367877	2.30022	1.86e-05	0.00082309	0.000691336	2112	tags=49%, list=25%, signal=37%	NCOA7/SYNM/HOTAIRM1/PDLIM3/PAK3/ARMCX4/MAP2/PLEKHH2/LAMA3/SYNPO2/CMTM8/CNTNAP3/VTCN1/EGFR/TRIM29/RNFT1/TNC/MET/CFAP70/MYH11/AK5/MYBPC1/CHL1/FAM189A2/CHI3L1/COL17A1/BHLHE41/TF/ID4/ATP10D/ELF5/ATF3/TSHZ2/CMYA5/FBXO32/ATP1A2/CX3CL1
RIGGI_EWING_SARCOMA_PROGENITOR_DN	RIGGI_EWING_SARCOMA_PROGENITOR_DN	RIGGI_EWING_SARCOMA_PROGENITOR_DN	83	0.362752	2.29999	8.94e-06	0.00043789	0.000367796	1567	tags=42%, list=19%, signal=35%	KITLG/STC2/GSAP/PCOLCE2/PDK4/CEP126/SLIT3/BNC2/GNG2/F2RL1/BMP4/ARNTL2/NAMPT/GXYLT2/RUNX2/EGFR/MIR100HG/ADORA2B/CHI3L2/SVEP1/LURAP1L/LACC1/SNX9/ADAM12/PIEZO2/PRRX1/NRP1/PDE1A/PPL/BEND6/CHI3L1/IFT80/LAMA4/SPON1/CLU
HECKER_IFNB1_TARGETS	HECKER_IFNB1_TARGETS	HECKER_IFNB1_TARGETS	25	0.51095	2.29609	0.000262944	0.00676501	0.00568212	1727	tags=64%, list=21%, signal=51%	IFIT5/CYP4F3/PARP12/MGAM/DHX58/PLSCR1/PROS1/SAMD9L/OAS3/EIF2AK2/DDX60/CHI3L1/XAF1/PARP9/CLU/DTX3L
XIE_ST_HSC_S1PR3_OE_UP	XIE_ST_HSC_S1PR3_OE_UP	XIE_ST_HSC_S1PR3_OE_UP	71	0.370625	2.29604	3.95e-05	0.00153979	0.00129331	1547	tags=44%, list=19%, signal=36%	NCOA7/HDAC9/IFIT5/PARP12/SPP1/H1-0/CYP1B1/MAP2/COL6A3/DHX58/ABCC3/EPHA2/HPSE/PLSCR1/PROS1/SAMD9L/FRZB/SNPH/OAS3/EIF2AK2/ADAM12/DDX60/AK5/HMCN1/SLFN5/XAF1/ARAP3/LCK/NEDD9/CSMD3/PARP9
GOMF_CYTOSKELETAL_MOTOR_ACTIVITY	GOMF_CYTOSKELETAL_MOTOR_ACTIVITY	GOMF_CYTOSKELETAL_MOTOR_ACTIVITY	53	0.408761	2.29321	4.56e-05	0.00173156	0.00145438	1590	tags=49%, list=19%, signal=40%	KIF5C/DYNC2H1/MYO16/MYH15/DNAH5/KIF7/DNAH8/DNAH14/DNAH10/DNAH6/MYO6/DNAH12/DNAH2/MYO3A/KIF5A/KIF20B/KIF3A/DNAH7/MYH14/MYH3/DNAH9/MYH11/CENPE/DNAH11/MYH8/KIF28P
REACTOME_DAP12_INTERACTIONS	REACTOME_DAP12_INTERACTIONS	REACTOME_DAP12_INTERACTIONS	18	0.580535	2.28608	0.000216095	0.00586786	0.00492858	1486	tags=67%, list=18%, signal=55%	VAV3/B2M/HLA-B/HLA-C/CD300E/PLCG2/GRAP2/KRAS/NCR2/PIK3CB/LCK/TREM2
HORIUCHI_WTAP_TARGETS_UP	HORIUCHI_WTAP_TARGETS_UP	HORIUCHI_WTAP_TARGETS_UP	133	0.325361	2.28494	9.34e-07	5.98e-05	5.02e-05	1768	tags=39%, list=21%, signal=31%	ITGA1/QPCT/PPM1D/PAPPA/ITPR2/ADAM23/STC2/SERPINE2/ERAP1/SIPA1L2/ENDOD1/TXNIP/ACTA2/H1-0/NR3C1/CRISPLD1/CASP7/SPATA18/GCNT2/PCTP/BTN3A3/FAM200B/COLEC12/NUDT16/PCMTD1/CEBPB/INPP1/LACC1/DKK3/COL4A1/PAQR3/CEP290/RAB22A/TFPI/CAST/GLIS3/PCGF5/HMCN1/CDH11/NDRG4/PTPRM/SESN3/CROT/KLHL6/ANKRD12/CHD2/ZNF678/CXCL3/AP1S2/CREG1/LYRM7/ETFRF1
PLASARI_TGFB1_SIGNALING_VIA_NFIC_10HR_UP	PLASARI_TGFB1_SIGNALING_VIA_NFIC_10HR_UP	PLASARI_TGFB1_SIGNALING_VIA_NFIC_10HR_UP	31	0.46842	2.27325	0.00014892	0.00439654	0.00369277	1593	tags=52%, list=19%, signal=42%	ITGA1/FAS/PDK4/RGS5/PLEKHH2/STEAP2/RGS4/PLSCR1/IL1RAP/PARM1/PERP/CD38/ADGRG6/MYH11/EPHA4/STK26
HOLLERN_SQUAMOUS_BREAST_TUMOR	HOLLERN_SQUAMOUS_BREAST_TUMOR	HOLLERN_SQUAMOUS_BREAST_TUMOR	35	0.448918	2.2729	0.000149262	0.00439654	0.00369277	894	tags=40%, list=11%, signal=36%	SLCO5A1/TCHH/OVOL1/GNAI1/CYP1B1/PAWR/HOPX/PTBP3/VAV3/BMP4/ADTRP/SERPINB9/TRIM29/KRT10
LINDVALL_IMMORTALIZED_BY_TERT_UP	LINDVALL_IMMORTALIZED_BY_TERT_UP	LINDVALL_IMMORTALIZED_BY_TERT_UP	28	0.490047	2.27193	0.000124348	0.00382511	0.00321282	1744	tags=54%, list=21%, signal=43%	TMTC1/STC2/USP53/RNF150/COL15A1/FRMD4A/PAPSS2/EFEMP1/BMP4/PGM5/SNX9/RILPL2/A2M/BBS7/KDELR3
REACTOME_BINDING_AND_UPTAKE_OF_LIGANDS_BY_SCAVENGER_RECEPTORS	REACTOME_BINDING_AND_UPTAKE_OF_LIGANDS_BY_SCAVENGER_RECEPTORS	REACTOME_BINDING_AND_UPTAKE_OF_LIGANDS_BY_SCAVENGER_RECEPTORS	17	0.589161	2.2682	0.000101078	0.00328671	0.0027606	2268	tags=82%, list=27%, signal=60%	COL4A2/APOB/COLEC12/HSPH1/CD36/MASP1/STAB2/COL4A1/COL1A1/STAB1/SSC5D/MSR1/COL1A2/HPX
GOMF_GROWTH_FACTOR_RECEPTOR_BINDING	GOMF_GROWTH_FACTOR_RECEPTOR_BINDING	GOMF_GROWTH_FACTOR_RECEPTOR_BINDING	43	0.42186	2.26059	0.00016299	0.00471887	0.00396351	1130	tags=40%, list=14%, signal=34%	FGF2/FLRT3/ERAP1/PGF/CD2AP/EGF/VAV3/EFEMP1/PLSCR1/IL1RAP/ERBB4/PIBF1/PDGFC/ARF4/FGF1/SNX2/FGF23
BURTON_ADIPOGENESIS_12	BURTON_ADIPOGENESIS_12	BURTON_ADIPOGENESIS_12	19	0.558264	2.25682	0.000263028	0.00676501	0.00568212	2353	tags=68%, list=28%, signal=49%	KITLG/H1-0/CYP1B1/PTBP3/MYEF2/GTF2A1/DNAJC3/FAM76B/TMEM68/DIPK2A/UBE2V2/EMC2/KIF2A
BOQUEST_STEM_CELL_CULTURED_VS_FRESH_UP	BOQUEST_STEM_CELL_CULTURED_VS_FRESH_UP	BOQUEST_STEM_CELL_CULTURED_VS_FRESH_UP	179	0.297151	2.25115	4.14e-07	3.01e-05	2.53e-05	1872	tags=39%, list=22%, signal=31%	NELL2/FGF2/DDAH1/PAPPA/HLF/ALCAM/STC2/SYNM/SERPINE2/ERAP1/ME1/SORBS1/TXNIP/PDK4/COL15A1/RGS5/LMO7/CYP1B1/TENM3/TSC22D3/SCG5/LRP1B/CDC42EP3/ABI3BP/PAPSS2/MAN1A1/COLEC12/GREM2/RGS4/ACAN/CD302/POPDC3/FAXDC2/FN1/NAMPT/IGF1/NTRK2/DSP/EGFR/FRZB/MET/FMO2/CYLD/ADH1B/ADAM12/RAI14/TFPI/KCNS3/GPNMB/PDLIM5/CHI3L1/NPR3/CD34/A2M/ABCC4/ATP8B4/ADAMTSL3/PMAIP1/FRMD4B/TRIB1/NEK7/CXCL3/ZBTB10/ESR1/MYBL1/ADAM22/ATF3…
CHARAFE_BREAST_CANCER_LUMINAL_VS_MESENCHYMAL_DN	CHARAFE_BREAST_CANCER_LUMINAL_VS_MESENCHYMAL_DN	CHARAFE_BREAST_CANCER_LUMINAL_VS_MESENCHYMAL_DN	219	0.288236	2.24453	3.74e-08	3.43e-06	2.88e-06	1374	tags=34%, list=16%, signal=29%	TIMP1/ITGA1/SNX7/PAPPA/CNRIP1/SERPINE2/FAM126A/KCTD12/HOTAIRM1/FZD2/MFGE8/GPX8/TGFBI/FAS/DNAJB4/ACTA2/GNAI1/NR3C1/CPNE2/LARP6/COL4A2/STK17A/EIF5A2/BNC2/NECTIN3/ANTXR1/SPAG9/COL6A3/GNG2/SMAD3/EPB41L2/FAM200B/EPHA2/RGS4/ARNTL2/POPDC3/TCEAL9/GXYLT2/INPP1/PRR16/RUNX2/SGTB/PROS1/EGFR/PSMB9/MIR100HG/COL13A1/ADORA2B/MMP2/PDGFC/MET/QKI/DKK3/COL4A1/ACTN1/CLMP/PLAT/NMNAT2/RAI14/TFPI/NID2/NAV3/NRP1/EDIL3/AK…
GOBP_POSITIVE_REGULATION_OF_ERK1_AND_ERK2_CASCADE	GOBP_POSITIVE_REGULATION_OF_ERK1_AND_ERK2_CASCADE	GOBP_POSITIVE_REGULATION_OF_ERK1_AND_ERK2_CASCADE	66	0.371464	2.24396	7.19e-05	0.00247969	0.00208276	2153	tags=53%, list=26%, signal=40%	FGF2/SLC30A10/DRD2/ACTA2/GCNT2/RAP1B/NTRK3/F2RL1/BMP4/CD36/IGF1/NTRK2/CFLAR/ERBB4/EGFR/ALKAL1/PDGFC/FGF1/FGF23/FBXW7/NRP1/GPNMB/CHI3L1/OPRM1/NDRG4/CSF1R/TREM2/CD74/NOTCH2/PDE8A/GAREM1/CX3CL1/PTEN/MAP3K12/PTPRC
GOBP_REGULATION_OF_BIOMINERALIZATION	GOBP_REGULATION_OF_BIOMINERALIZATION	GOBP_REGULATION_OF_BIOMINERALIZATION	34	0.445605	2.23747	0.000352982	0.00861767	0.00723822	1136	tags=44%, list=14%, signal=38%	TENT5A/ALOX5/BMPR1B/S1PR1/WNT4/P2RX7/SMAD3/FBN2/BMP4/CEBPB/NBR1/HEY2/CFTR/FGF23/TXLNG
SCHRAETS_MLL_TARGETS_UP	SCHRAETS_MLL_TARGETS_UP	SCHRAETS_MLL_TARGETS_UP	14	0.620307	2.23539	0.000178623	0.00504993	0.00424158	1975	tags=79%, list=24%, signal=60%	SERPINE2/HOXA1/TOB1/FAS/ACTA2/TOM1L1/TNC/CD34/IFI16/BTG3/MLF1
BOYLAN_MULTIPLE_MYELOMA_C_D_DN	BOYLAN_MULTIPLE_MYELOMA_C_D_DN	BOYLAN_MULTIPLE_MYELOMA_C_D_DN	103	0.333573	2.23319	1.27e-05	0.00058886	0.0004946	1794	tags=43%, list=21%, signal=34%	ITGA1/ALCAM/SLC41A2/SCAMP1/TGFBI/MGAM/ELOVL7/PAWR/ABI3BP/VAV3/F2RL1/TRIM5/PLSCR1/RMDN2/HOOK1/C3/RRAS2/TMEM154/RUNX2/MPO/DSP/PRLR/SPAG6/EAF2/OSBPL3/DSG2/IRF6/TENT5C/DNAJB14/CASP4/GDA/OXR1/ANXA2/FOSL2/PIK3CB/ELL2/XDH/SPON1/TTC39B/IFI16/GRAMD1C/KDELR3/F13A1/PLCB4
REACTOME_IMMUNOREGULATORY_INTERACTIONS_BETWEEN_A_LYMPHOID_AND_A_NON_LYMPHOID_CELL	REACTOME_IMMUNOREGULATORY_INTERACTIONS_BETWEEN_A_LYMPHOID_AND_A_NON_LYMPHOID_CELL	REACTOME_IMMUNOREGULATORY_INTERACTIONS_BETWEEN_A_LYMPHOID_AND_A_NON_LYMPHOID_CELL	35	0.440855	2.23208	0.000232328	0.0062195	0.00522393	1592	tags=54%, list=19%, signal=44%	COLEC12/B2M/HLA-B/HLA-C/TREML4/C3/CD300E/SELL/CD200R1/MICA/COL1A1/CD160/NCR2/COL17A1/LILRB3/CD34/MICB/TREM2/CD300LG
ACEVEDO_LIVER_CANCER_WITH_H3K9ME3_UP	ACEVEDO_LIVER_CANCER_WITH_H3K9ME3_UP	ACEVEDO_LIVER_CANCER_WITH_H3K9ME3_UP	46	0.409425	2.23204	0.000255104	0.00660828	0.00555048	974	tags=37%, list=12%, signal=33%	MYO16/FAT3/SLC35F2/SIPA1L2/MGAM/CEP126/ARHGAP18/ZDBF2/ZC2HC1A/ELOVL7/C5orf64/GNG2/PKHD1/MAGEH1/KRT10/GALNT5/NEB
TAKEDA_TARGETS_OF_NUP98_HOXA9_FUSION_3D_UP	TAKEDA_TARGETS_OF_NUP98_HOXA9_FUSION_3D_UP	TAKEDA_TARGETS_OF_NUP98_HOXA9_FUSION_3D_UP	67	0.367568	2.22462	7.13e-05	0.0024654	0.00207076	1727	tags=42%, list=21%, signal=33%	NCOA7/MLLT3/PTPN13/IFIT5/NEGR1/PARP12/PTGER3/ARHGEF3/COL24A1/ADRB1/VMP1/HOPX/SLC9A7/SCN2A/SAMD9L/OAS3/EIF2AK2/DDX60/KLF5/MALAT1/BEND6/IRF1-AS1/XAF1/TRIM22/PARP9/IFI16/HOXB3/DTX3L
NIKOLSKY_BREAST_CANCER_15Q26_AMPLICON	NIKOLSKY_BREAST_CANCER_15Q26_AMPLICON	NIKOLSKY_BREAST_CANCER_15Q26_AMPLICON	13	0.628523	2.2204	0.00035048	0.00860543	0.00722794	3110	tags=100%, list=37%, signal=63%	SYNM/MEF2A/TARS3/SELENOS/LRRK1/ADAMTS17/FAM169B/ASB7/LINS1/SNRPA1/TTC23/TM2D3/CHSY1
GOBP_SENSORY_PERCEPTION_OF_MECHANICAL_STIMULUS	GOBP_SENSORY_PERCEPTION_OF_MECHANICAL_STIMULUS	GOBP_SENSORY_PERCEPTION_OF_MECHANICAL_STIMULUS	69	0.361665	2.21954	4.98e-05	0.00186562	0.00156699	1478	tags=42%, list=18%, signal=35%	HOMER2/USP53/SERPINE2/HOXA1/SERPINB6/SIX1/PCDH15/OTOGL/PKHD1L1/OTOF/TRPA1/PHF24/SLC26A4/MYO6/RIPOR2/PGAP1/POU4F2/DCDC2/TMC1/MYO3A/TMC2/MYH14/CLIC5/COL1A1/GABRB2/PIEZO2/MARVELD2/CACNA1D/EYA1
MIYAGAWA_TARGETS_OF_EWSR1_ETS_FUSIONS_DN	MIYAGAWA_TARGETS_OF_EWSR1_ETS_FUSIONS_DN	MIYAGAWA_TARGETS_OF_EWSR1_ETS_FUSIONS_DN	96	0.340496	2.21419	3.45e-05	0.00137819	0.00115758	1384	tags=39%, list=17%, signal=33%	STC2/SYNM/TNIK/FAM126A/NR3C1/FAM171B/TENM3/EIF5A2/RPS6KA6/SCG5/MAP2/CDC42EP3/SLC4A7/ITGA11/PRR16/EGFR/LTBP1/VGLL3/GALNT5/CCDC80/CEP135/SNX9/ACTN1/ADAM12/ELOVL6/MINDY2/NID2/PRRX1/ENPP2/NRP1/AK5/GPNMB/SEMA5A/CHI3L1/GRIA1/PLOD2/ELL2
HUTTMANN_B_CLL_POOR_SURVIVAL_DN	HUTTMANN_B_CLL_POOR_SURVIVAL_DN	HUTTMANN_B_CLL_POOR_SURVIVAL_DN	30	0.464069	2.21149	0.000242907	0.00639951	0.00537513	2280	tags=60%, list=27%, signal=44%	ALCAM/SYNJ2/ZNF652/SLC4A7/NUCB2/RRAS2/EAF2/SMC5/DGKG/FUT8/ATP10D/PDE8A/MYBL1/MEF2C/GLIPR1/CNTNAP2/ADAM29/ATP1B1
BASAKI_YBX1_TARGETS_DN	BASAKI_YBX1_TARGETS_DN	BASAKI_YBX1_TARGETS_DN	178	0.292795	2.21119	8.17e-07	5.33e-05	4.48e-05	2143	tags=43%, list=26%, signal=33%	DYNC2H1/SALL1/SYTL2/FLRT3/CAMK2N1/SCAMP1/DPP4/SLC25A27/SPP1/BTN3A2/TMEM106B/RAB3IP/GRB14/ARHGAP18/TSC22D3/BNC2/TARS3/SEC62/ANTXR1/VMP1/CGNL1/DNAH12/BTN3A3/TP53INP1/PAPSS2/SLC9A7/VAV3/MYEF2/CD302/HECW2/CNTNAP3/SKIL/PROS1/PLCG2/ZNF770/GDPD1/SMPDL3A/MET/NT5DC1/SLC6A12/C5orf24/RXFP1/PNISR/SLC30A1/MGAT4A/FSBP/SGK2/MALAT1/MINDY2/TFPI/DNAJC3/MAST4/TM9SF3/NCALD/PLOD2/PTER/GAL3ST1/IFI16/NFKBIZ/CHD2/APOOL/…
GOBP_POSITIVE_REGULATION_OF_BONE_MINERALIZATION	GOBP_POSITIVE_REGULATION_OF_BONE_MINERALIZATION	GOBP_POSITIVE_REGULATION_OF_BONE_MINERALIZATION	16	0.591495	2.21009	0.000242688	0.00639951	0.00537513	664	tags=50%, list=8%, signal=46%	TENT5A/ALOX5/BMPR1B/WNT4/P2RX7/SMAD3/FBN2/BMP4
GOBP_HEMOSTASIS	GOBP_HEMOSTASIS	GOBP_HEMOSTASIS	84	0.345991	2.20953	3.09e-05	0.0012526	0.0010521	2036	tags=48%, list=24%, signal=36%	PDPN/F5/MERTK/SERPINE2/TPH1/ENPP4/DGKE/ABAT/PAPSS2/VAV3/F2RL1/HPSE/PLSCR1/CD36/FN1/ADTRP/SCUBE1/PROS1/PLCG2/CSRP1/SLC4A1/PROCR/GNA13/ACTN1/PLAT/TFPI/PIK3CB/CD34/LCK/GP5/DGKG/PEAR1/NFE2L2/F13A1/ITGA2/GNAQ/BLOC1S6/LNPK/AP3B1/CYP4F2
ZHENG_BOUND_BY_FOXP3	ZHENG_BOUND_BY_FOXP3	ZHENG_BOUND_BY_FOXP3	202	0.285881	2.2066	8.94e-07	5.79e-05	4.87e-05	2834	tags=53%, list=34%, signal=36%	ANKRD44/SNCA/ABLIM1/MLLT3/ITPR2/ST8SIA1/ST6GALNAC5/ICA1/FAS/SPP1/RAB3IP/PTGER3/ARHGEF3/GRB14/SHTN1/SESN1/TUBE1/HEXIM1/S1PR1/MAN1A2/SPEF2/ZFAND6/MDM2/PGAP1/MIR4435-2HG/GNG2/TP53INP1/SMAD3/MAN1A1/PTBP3/F2RL1/TRIM5/DTX4/RAD51C/RRAS2/PARM1/UTRN/RB1/SELL/CD200R1/CACNB4/CMAHP/TENT5C/SNX9/IMPA1/TLK1/ZNF217/CAST/NRP1/BEND6/ELK3/IFT80/OPRM1/RAB8B/FAM76B/ETNK1/ANKRD55/FRMD4B/TRIB1/NEK7/TTC39B/NFKBIZ/CAMK4/…
REACTOME_REGULATION_OF_INSULIN_LIKE_GROWTH_FACTOR_IGF_TRANSPORT_AND_UPTAKE_BY_INSULIN_LIKE_GROWTH_FACTOR_BINDING_PROTEINS_IGFBPS	REACTOME_REGULATION_OF_INSULIN_LIKE_GROWTH_FACTOR_IGF_TRANSPORT_AND_UPTAKE_BY_INSULIN_LIKE_GROWTH_FACTOR_BINDING_PROTEINS_IGFBPS	REACTOME_REGULATION_OF_INSULIN_LIKE_GROWTH_FACTOR_IGF_TRANSPORT_AND_UPTAKE_BY_INSULIN_LIKE_GROWTH_FACTOR_BINDING_PROTEINS_IGFBPS	48	0.398923	2.20547	0.000179466	0.00506057	0.00425051	1178	tags=40%, list=14%, signal=34%	TIMP1/PAPPA/F5/STC2/MFGE8/SPP1/APOB/KLK2/BMP4/FN1/C3/IGF1/RCN1/MMP2/LTBP1/TNC/MGAT4A/FGF23/DNAJC3
GOCC_PLATELET_ALPHA_GRANULE	GOCC_PLATELET_ALPHA_GRANULE	GOCC_PLATELET_ALPHA_GRANULE	33	0.4452	2.20357	0.000507589	0.0114743	0.00963755	1877	tags=52%, list=22%, signal=40%	SNCA/TIMP1/F5/SERPINE2/EGF/SYTL4/CD36/FN1/IGF1/PROS1/ACTN1/PECAM1/A2M/CLU/APOOL/F13A1/HGF
GOBP_NITRIC_OXIDE_MEDIATED_SIGNAL_TRANSDUCTION	GOBP_NITRIC_OXIDE_MEDIATED_SIGNAL_TRANSDUCTION	GOBP_NITRIC_OXIDE_MEDIATED_SIGNAL_TRANSDUCTION	12	0.64244	2.20346	0.000566557	0.0124114	0.0104246	1082	tags=58%, list=13%, signal=51%	NDNF/DDAH1/NOS1/NOS2/CD36/EGFR/GUCY1A2
BROWNE_INTERFERON_RESPONSIVE_GENES	BROWNE_INTERFERON_RESPONSIVE_GENES	BROWNE_INTERFERON_RESPONSIVE_GENES	23	0.499763	2.20211	0.000824045	0.0166469	0.0139822	1770	tags=57%, list=21%, signal=45%	KIF5C/IFIT5/RGL1/TRIM21/LMO2/PSMB8/PLSCR1/PSMB9/EIF2AK2/XAF1/TAP1/TRIM22/SP100
SENESE_HDAC3_TARGETS_UP	SENESE_HDAC3_TARGETS_UP	SENESE_HDAC3_TARGETS_UP	225	0.281677	2.20096	2.66e-07	2.05e-05	1.73e-05	2189	tags=42%, list=26%, signal=32%	MSC-AS1/HDAC9/FAT3/KITLG/PAPPA/USP53/SERPINE2/TNIK/FAM126A/HHIP/SCAMP1/FAS/CALB1/SPP1/PDK4/ZMAT3/MAP2/PLEKHH2/MAN1A2/KDM1B/MYO6/AP1S3/GNG2/AKR1B10/MAN1A1/PTBP3/F2RL1/RGS4/ARNTL2/IL1RAP/FN1/NAMPT/DNAJC13/TMEM154/CNTNAP3/SLC6A15/TMEM30A/MIR100HG/CLDN12/RB1/PDGFC/MET/GNA13/SLAIN2/LURAP1L/TNFSF15/PPP4R3A/STYX/ADAM12/DNAJB14/GUCY1A2/MALAT1/RPAP3/ADGRL3/KYNU/NAV3/EDIL3/TMED2/CDC27/SLFN5/USP32/FCHO2/ELK…
CONCANNON_APOPTOSIS_BY_EPOXOMICIN_UP	CONCANNON_APOPTOSIS_BY_EPOXOMICIN_UP	CONCANNON_APOPTOSIS_BY_EPOXOMICIN_UP	106	0.328333	2.19896	9.59e-06	0.000465434	0.000390931	1864	tags=42%, list=22%, signal=33%	KITLG/CYP4F3/SYNJ2/PDLIM3/ME1/FAS/HSPA4L/SPP1/DNAJB4/ACTA2/LMO2/DGKE/PGF/STK17A/MAP2/CASP7/MDM2/PLK2/RAB21/F2RL1/HSPH1/CEBPB/SKIL/TMF1/INPP5D/DNAJC2/GTF2A1/PLAT/FAT1/CAP2/ZRSR2/ANXA2/ELL2/MICB/GOSR2/PSMD12/CLU/GADD45A/TSPYL2/PALLD/CREB5/N4BP2L2/SRP19/DTNA/ATF3
VECCHI_GASTRIC_CANCER_ADVANCED_VS_EARLY_UP	VECCHI_GASTRIC_CANCER_ADVANCED_VS_EARLY_UP	VECCHI_GASTRIC_CANCER_ADVANCED_VS_EARLY_UP	67	0.363194	2.19814	9.2e-05	0.00306592	0.00257515	2431	tags=61%, list=29%, signal=44%	SNX10/STC2/CPNE8/ALOX5/SPP1/COL15A1/BMPR1B/HDGFL3/CYP1B1/CRISPLD1/ANTXR1/ITGBL1/EFEMP1/IL1RAP/FN1/MAGEH1/GXYLT2/PDGFC/FMO2/QKI/COL4A1/ADAM12/NID2/PRRX1/GPNMB/PLOD2/CDH11/EPHA4/GNB4/CYP7B1/COL12A1/JMY/NTM/HES2/ALDH1L2/FBXO32/MSR1/COL1A2/LINC00888/PRELP/RBMS1
HALLMARK_PANCREAS_BETA_CELLS	HALLMARK_PANCREAS_BETA_CELLS	HALLMARK_PANCREAS_BETA_CELLS	15	0.596774	2.19428	0.000468598	0.0108289	0.00909548	367	tags=47%, list=4%, signal=45%	DPP4/PAK3/SYT13/PCSK2/LMO2/ISL1/PAX6
GOBP_PITUITARY_GLAND_DEVELOPMENT	GOBP_PITUITARY_GLAND_DEVELOPMENT	GOBP_PITUITARY_GLAND_DEVELOPMENT	15	0.595892	2.19104	0.00047873	0.010968	0.00921235	664	tags=53%, list=8%, signal=49%	FGF2/SALL1/PITX2/DRD2/ISL1/PAX6/WNT4/BMP4
GOMF_MICROTUBULE_MOTOR_ACTIVITY	GOMF_MICROTUBULE_MOTOR_ACTIVITY	GOMF_MICROTUBULE_MOTOR_ACTIVITY	34	0.435034	2.18439	0.000572818	0.0124548	0.0104611	1590	tags=53%, list=19%, signal=43%	KIF5C/DYNC2H1/DNAH5/KIF7/DNAH8/DNAH14/DNAH10/DNAH6/DNAH12/DNAH2/KIF5A/KIF20B/KIF3A/DNAH7/DNAH9/CENPE/DNAH11/KIF28P
GOCC_T_CELL_RECEPTOR_COMPLEX	GOCC_T_CELL_RECEPTOR_COMPLEX	GOCC_T_CELL_RECEPTOR_COMPLEX	10	0.678933	2.18231	0.000929008	0.017931	0.0150608	793	tags=60%, list=9%, signal=54%	TRBV4-2/TRBV4-1/TRBV7-2/TRBV3-1/SKAP1/TRBV7-4
SMIRNOV_RESPONSE_TO_IR_6HR_UP	SMIRNOV_RESPONSE_TO_IR_6HR_UP	SMIRNOV_RESPONSE_TO_IR_6HR_UP	90	0.339651	2.18123	3.69e-05	0.00145872	0.00122522	1002	tags=27%, list=12%, signal=24%	FGF2/PPM1D/TENT5A/FAM169A/TOB1/CYP4F3/FAS/KCNN3/DNAJB4/ACTA2/ZMAT3/PGF/SESN1/DRAM1/MDM2/PGAP1/PLK2/RAD51C/INPP1/GLS2/CCP110/ABCA12/PROCR/SLC30A1
HP_COMPLEX_FEBRILE_SEIZURE	HP_COMPLEX_FEBRILE_SEIZURE	HP_COMPLEX_FEBRILE_SEIZURE	11	0.64708	2.1811	0.000773216	0.0159778	0.0134202	2954	tags=100%, list=35%, signal=65%	PCDH19/CACNA1A/SCN2A/PDE2A/PRRT2/SCN9A/ATP1A2/GABRA1/SCN1B/GABRG2/FAR1
GOMF_HEPARIN_BINDING	GOMF_HEPARIN_BINDING	GOMF_HEPARIN_BINDING	50	0.393269	2.1802	0.000153496	0.00447994	0.00376283	1267	tags=40%, list=15%, signal=34%	NELL2/FGF2/NDNF/SERPINE2/PCOLCE2/COL25A1/PGF/SLIT3/APOB/LIPG/GREM2/BMP4/FN1/MPO/COL13A1/SELL/CCDC80/FGF1/NRP1/GPNMB
IKEDA_MIR30_TARGETS_UP	IKEDA_MIR30_TARGETS_UP	IKEDA_MIR30_TARGETS_UP	65	0.364819	2.18007	0.000113604	0.00357215	0.00300035	2566	tags=57%, list=31%, signal=40%	DDAH1/CPNE8/GOLGA4/BECN1/HDGFL3/BNC2/MAN1A2/PTBP3/SLC4A7/GALNT7/GNA13/ARF4/ACTN1/ADGRL3/RAI14/PTPN2/KRAS/ARID4A/CAST/USP15/PPP1R12A/PDCD10/ARID4B/PLCB4/DTNA/UBE2V2/PAPOLA/CAPZA1/RAP2C/CLOCK/CCPG1/NEDD4/EPC2/DDX46/SCAF4/YWHAZ/CPEB4
VERHAAK_GLIOBLASTOMA_MESENCHYMAL	VERHAAK_GLIOBLASTOMA_MESENCHYMAL	VERHAAK_GLIOBLASTOMA_MESENCHYMAL	96	0.335166	2.17953	5.89e-05	0.00209957	0.00176348	1770	tags=41%, list=21%, signal=32%	PDPN/TIMP1/STAT6/ALOX5/ITGAM/TGFBI/C1orf54/BNC2/DRAM1/CD2AP/HFE/CYBRD1/MAN1A1/CEBPB/RUNX2/TRIM38/LTBP1/PROCR/TNFRSF1A/COL1A1/ADAM12/CASP4/ZNF217/CAST/KYNU/TMBIM1/NRP1/ANXA2/FXYD5/MGST2/CHI3L1/CYTH4/LILRB3/TRIM22/VAMP5/IQGAP1/STAB1/PHF11/SP100
HP_MALE_INFERTILITY	HP_MALE_INFERTILITY	HP_MALE_INFERTILITY	39	0.416663	2.17947	0.000538218	0.0119178	0.0100101	2279	tags=54%, list=27%, signal=39%	DNAH5/DDX3Y/DNAH8/DNAH10/SPEF2/DNAH2/CFAP70/CFTR/CFAP221/DNAH9/SPAG1/BLM/LHCGR/DNAAF4/MNS1/DNAH11/DRC1/CFAP65/CCDC65/CYP19A1/ZFPM2
GOBP_CILIUM_OR_FLAGELLUM_DEPENDENT_CELL_MOTILITY	GOBP_CILIUM_OR_FLAGELLUM_DEPENDENT_CELL_MOTILITY	GOBP_CILIUM_OR_FLAGELLUM_DEPENDENT_CELL_MOTILITY	48	0.394191	2.17932	0.000231864	0.0062195	0.00522393	2265	tags=58%, list=27%, signal=43%	DNAH5/DNAH8/APOB/DNAH14/DNAH6/SPEF2/DNAH2/TPPP2/TMF1/SPAG6/ATP1A4/DNAH7/EPPIN/SLC22A14/FSIP2/TACR3/CFAP54/MNS1/DNAH11/DRC1/CCSAP/SLC26A8/CFAP65/CFAP43/CATSPER4/TTLL6/CCDC65/UBE2B
SERVITJA_ISLET_HNF1A_TARGETS_UP	SERVITJA_ISLET_HNF1A_TARGETS_UP	SERVITJA_ISLET_HNF1A_TARGETS_UP	70	0.352863	2.17893	0.000172977	0.00494195	0.00415088	1864	tags=47%, list=22%, signal=37%	SNCA/GAP43/SERPINE2/PCDH15/CNR1/CYP1B1/THY1/SNCG/ABCC3/SMAD3/EPB41L2/FGF14/DNM3/RAB6B/HLA-B/EFEMP1/PRKG2/SLC6A15/ADCYAP1R1/PROCR/DKK3/CHL1/ANXA2/EPHA5/ELAVL2/CDH11/REST/CAMK4/ID4/PLCB4/NTM/NOTCH2/ATF3
BRACHAT_RESPONSE_TO_METHOTREXATE_UP	BRACHAT_RESPONSE_TO_METHOTREXATE_UP	BRACHAT_RESPONSE_TO_METHOTREXATE_UP	13	0.615195	2.17331	0.000536939	0.0119139	0.0100068	544	tags=54%, list=7%, signal=50%	ABLIM1/NECTIN4/TOB1/TXNIP/MDM2/VMP1/TP53INP1
GOBP_BONE_MINERALIZATION	GOBP_BONE_MINERALIZATION	GOBP_BONE_MINERALIZATION	42	0.406548	2.17158	0.00028566	0.00726085	0.00609859	2247	tags=57%, list=27%, signal=42%	SNX10/TENT5A/ALOX5/BMPR1B/S1PR1/WNT4/P2RX7/SMAD3/FBN2/BMP4/IGF1/NBR1/SBDS/FGF23/TXLNG/KLF10/IFT80/EIF2AK3/MEF2C/LGR4/RSPO2/MATN1/COL1A2/SGMS2
SENGUPTA_NASOPHARYNGEAL_CARCINOMA_UP	SENGUPTA_NASOPHARYNGEAL_CARCINOMA_UP	SENGUPTA_NASOPHARYNGEAL_CARCINOMA_UP	117	0.316898	2.17104	1.92e-05	0.000839558	0.000705168	1516	tags=32%, list=18%, signal=27%	FGF2/KITLG/ADAM23/SLCO5A1/ERAP1/B4GALT6/FAS/ACTA2/COL15A1/HDGFL3/COL4A2/THY1/EIF5A2/DRAM1/MANEA/PGAP1/PAPSS2/SYNPO2/SLC9A7/FN1/RCN1/ASCC3/TNFSF15/CEP135/COL4A1/COL1A1/DDX60/OTUD6B/PRRX1/CHI3L1/KLHL5/XAF1/CDH11/KCNMA1/PHF20L1/CENPE/QSER1/PMAIP1
HARRIS_BRAIN_CANCER_PROGENITORS	HARRIS_BRAIN_CANCER_PROGENITORS	HARRIS_BRAIN_CANCER_PROGENITORS	13	0.613706	2.16805	0.000566495	0.0124114	0.0104246	2378	tags=77%, list=28%, signal=55%	KCNA4/LARP6/SCG5/PAPSS2/VWC2/CASP4/ERVFRD-1/DDC/MLIP/CREBRF
GOBP_POSITIVE_REGULATION_OF_ANION_TRANSPORT	GOBP_POSITIVE_REGULATION_OF_ANION_TRANSPORT	GOBP_POSITIVE_REGULATION_OF_ANION_TRANSPORT	19	0.535493	2.16476	0.000709902	0.0148907	0.0125071	1563	tags=58%, list=19%, signal=47%	ABCB1/ABAT/P2RX7/PLA2R1/CEBPB/KMO/SLC34A1/CFTR/SLC6A1/TRH/PTAFR
BOSCO_INTERFERON_INDUCED_ANTIVIRAL_MODULE	BOSCO_INTERFERON_INDUCED_ANTIVIRAL_MODULE	BOSCO_INTERFERON_INDUCED_ANTIVIRAL_MODULE	25	0.481525	2.16386	0.0007926	0.0162336	0.013635	1514	tags=52%, list=18%, signal=43%	NCOA7/IFIT5/PARP12/GOLGA4/DHX58/SAMD9L/OAS3/EIF2AK2/DDX60/LRRC37A11P/PTPN2/XAF1/TRIM22
GOCC_CLUSTER_OF_ACTIN_BASED_CELL_PROJECTIONS	GOCC_CLUSTER_OF_ACTIN_BASED_CELL_PROJECTIONS	GOCC_CLUSTER_OF_ACTIN_BASED_CELL_PROJECTIONS	67	0.357162	2.16164	0.00013492	0.0040694	0.003418	1107	tags=37%, list=13%, signal=33%	HOMER2/TRPM6/PCDH15/CA4/CALB1/PKHD1L1/PLB1/SLC22A5/TRPA1/SLC26A4/RIPOR2/CYBRD1/DCDC2/SLC4A7/CD36/TMC1/MYO3A/TMC2/SLC28A2/GNA13/SLC34A1/MYH14/CLIC5/ACTN1/MTTP
GOBP_ACTIVATION_OF_IMMUNE_RESPONSE	GOBP_ACTIVATION_OF_IMMUNE_RESPONSE	GOBP_ACTIVATION_OF_IMMUNE_RESPONSE	102	0.323983	2.15668	2.65e-05	0.0011029	0.000926355	1736	tags=38%, list=21%, signal=31%	BTN2A2/PAK3/BTN3A1/BTN3A2/THY1/HEXIM1/PAWR/C5/SUSD4/HHLA2/BTN3A3/BTN1A1/VAV3/TRIM5/PLSCR1/MASP1/C3/SKAP1/PLCG2/VTCN1/INPP5D/FCRL3/C7/CD38/PYHIN1/CD160/PTPN2/BTN2A3P/C8A/LCK/MICB/A2M/TREM2/CLU/KLHL6/IFI16/NFKBIZ/APPL1/CD47
NAKAYAMA_SOFT_TISSUE_TUMORS_PCA1_UP	NAKAYAMA_SOFT_TISSUE_TUMORS_PCA1_UP	NAKAYAMA_SOFT_TISSUE_TUMORS_PCA1_UP	20	0.521124	2.1566	0.000858453	0.01715	0.0144047	1754	tags=65%, list=21%, signal=51%	TIMP1/DOCK2/ITGAM/ITGBL1/EFEMP1/C3/AIF1/MRC1/BIN2/KYNU/GPNMB/CSF1R/F13A1
VERHAAK_GLIOBLASTOMA_NEURAL	VERHAAK_GLIOBLASTOMA_NEURAL	VERHAAK_GLIOBLASTOMA_NEURAL	57	0.374641	2.15506	0.000361691	0.00880088	0.00739211	1541	tags=40%, list=18%, signal=33%	REPS2/SLC30A10/ENPP4/CA4/GNAI1/SHTN1/MMD/SNCG/S1PR1/BCAS1/TSNAX/POPDC3/MAGEH1/SLCO1A2/TCEAL2/SH3GL3/IMPA1/GABRB2/ENPP2/EDIL3/MYBPC1/UGT8/PLCL1
NIKOLSKY_BREAST_CANCER_8Q12_Q22_AMPLICON	NIKOLSKY_BREAST_CANCER_8Q12_Q22_AMPLICON	NIKOLSKY_BREAST_CANCER_8Q12_Q22_AMPLICON	66	0.356721	2.1549	0.000214763	0.00585756	0.00491992	2876	tags=62%, list=34%, signal=41%	SLCO5A1/CALB1/PIP4P2/ZC2HC1A/CRISPLD1/TRPA1/TP53INP1/ESRP1/IMPA1/GRHL2/OTUD6B/NECAB1/SLC26A7/TRAM1/KLF10/CLVS1/SPAG1/EYA1/SLC10A5/ZBTB10/TERF1/OSGIN2/SNX31/RNF19A/PDP1/RGS22/TMEM64/UBE2W/SDC2/ZFAND1/NDUFAF6/YWHAZ/SNX16/DCAF13/DPY19L4/UQCRB/PI15/UBXN2B/RAB2A/SULF1/RPSAP47
NEWMAN_ERCC6_TARGETS_DN	NEWMAN_ERCC6_TARGETS_DN	NEWMAN_ERCC6_TARGETS_DN	21	0.510827	2.15159	0.000965531	0.0184713	0.0155146	1576	tags=57%, list=19%, signal=46%	LRCH2/ZMAT3/SCUBE3/SPATA18/ITGBL1/SGCD/SYNPO2/RGS4/GALNT5/CCDC80/CNTN3/MFAP5
BENPORATH_SUZ12_TARGETS	BENPORATH_SUZ12_TARGETS	BENPORATH_SUZ12_TARGETS	393	0.252969	2.15133	1.74e-09	2.27e-07	1.91e-07	1973	tags=39%, list=24%, signal=31%	LRCH2/NDNF/REPS2/MLLT3/TRHDE/DDAH1/SNX7/PAPPA/HLF/CNRIP1/SLCO5A1/NGFR/ANKRD18B/TRHDE-AS1/PTCHD1/ZCCHC12/ALOX5/CRABP1/SLC30A10/CAMK2N1/ST8SIA1/FZD2/ANKRD18A/HHIP/PITX2/SIX1/TMEM255A/GPR12/COL25A1/HSPA4L/OVOL1/ISL1/PTGER3/NFIA/NOS1/CYP1B1/SETD7/COL24A1/TSC22D3/RPS6KA6/PAX6/TRPA1/KCNH1/LIPG/CA10/ADRB1/SLC26A4/SPATA18/FOXA1/SUSD4/ELMOD1/TTYH1/POU4F2/LAMA3/CACNA1A/NTRK3/HOPX/COLEC12/ADCY4/ANKRD20A1/AN…
GOCC_RECEPTOR_COMPLEX	GOCC_RECEPTOR_COMPLEX	GOCC_RECEPTOR_COMPLEX	162	0.295416	2.14963	1.14e-06	7.12e-05	5.98e-05	1470	tags=36%, list=18%, signal=31%	KCTD16/TRBV4-2/ITGA1/TRBV4-1/ITPR2/MERTK/IL12RB2/TRBV7-2/ITGAM/EPHA6/NR3C2/TRBV3-1/BMPR1B/IL2RG/LRP1B/HFE/ITGBL1/SMAD3/PLA2R1/NTRK3/EPHA2/B2M/ARNTL2/CD36/SKAP1/ITGA11/ITGAX/GFRA1/NTRK2/ERBB4/TRBV7-4/NBR1/PRLR/VWC2/EGFR/CD200R1/ADCYAP1R1/MET/MUSK/TNFRSF1A/CAPRIN2/GRIN2B/MTTP/PTPRQ/GABRB2/NPR1/PKD1L3/LIFR/GABRB1/NRP1/GRIN3A/ERBB3/GPR63/GRIA1/EPHA5/SLITRK5/EPHA4/CSF1R/GP5
NABA_SECRETED_FACTORS	NABA_SECRETED_FACTORS	NABA_SECRETED_FACTORS	64	0.359069	2.146	0.000145302	0.00432233	0.00363044	1718	tags=44%, list=21%, signal=35%	FGF2/KITLG/HHIP/TCHH/PGF/IL16/SCUBE3/WNT4/EGF/FGF14/BMP4/IGF1/SCUBE1/VWC2/INHBE/WNT8A/FRZB/PDGFC/TNFSF15/FGF1/FGF23/LTA/IL19/FLG/S100A7A/FLG2/CXCL3/TPO
CHIANG_LIVER_CANCER_SUBCLASS_CTNNB1_DN	CHIANG_LIVER_CANCER_SUBCLASS_CTNNB1_DN	CHIANG_LIVER_CANCER_SUBCLASS_CTNNB1_DN	59	0.372383	2.14552	0.000199519	0.00555057	0.00466208	1466	tags=37%, list=18%, signal=31%	GLDC/TIMP1/SERPINE2/KCTD12/HSD17B2/MMD/COL6A3/EFEMP1/SERPINB9/GLS2/SLC16A14/GALNT7/C7/INHBE/LURAP1L/CCDC80/COL1A1/GDA/GLIS3/GPNMB/NCALD/MAL2
WARTERS_IR_RESPONSE_5GY	WARTERS_IR_RESPONSE_5GY	WARTERS_IR_RESPONSE_5GY	19	0.530423	2.14427	0.000871012	0.0172735	0.0145085	1864	tags=53%, list=22%, signal=41%	PPM1D/FAS/HSPA4L/SESN1/MDM2/TP53INP1/B2M/FBXW7/GADD45A/ATF3
WAMUNYOKOLI_OVARIAN_CANCER_LMP_DN	WAMUNYOKOLI_OVARIAN_CANCER_LMP_DN	WAMUNYOKOLI_OVARIAN_CANCER_LMP_DN	91	0.333386	2.14394	9.46e-05	0.00313251	0.00263108	2564	tags=54%, list=31%, signal=38%	NELL2/PPM1K/MAGI2-AS3/ZNF483/RGL1/BNC2/SPAG9/EFEMP1/DOCK11/PROS1/PSIP1/PDGFC/PROCR/GPRASP1/GABPA/CCDC80/ATF1/CAP2/GPNMB/DDX5/CSGALNACT2/UGP2/LAMA4/NLRP1/SLC30A4/STK26/IFI16/PREPL/BEX4/PTPN12/AP1S2/FBXL3/ACSS3/PLSCR4/TCEAL3/BLOC1S6/MCOLN3/GET1/FRAS1/WNT2B/SDC2/SEC11A/ZFPM2/KDR/KPNA5/RBMS1/EPC2/PRKAR1A/TCEAL1
REACTOME_CONSTITUTIVE_SIGNALING_BY_ABERRANT_PI3K_IN_CANCER	REACTOME_CONSTITUTIVE_SIGNALING_BY_ABERRANT_PI3K_IN_CANCER	REACTOME_CONSTITUTIVE_SIGNALING_BY_ABERRANT_PI3K_IN_CANCER	28	0.462344	2.1435	0.000601576	0.0128987	0.010834	1877	tags=50%, list=22%, signal=39%	FGF2/KITLG/EGF/ERBB4/EGFR/MET/FGF1/FGF23/ERBB3/PIK3CB/LCK/STRN/ESR1/HGF
LIU_PROSTATE_CANCER_DN	LIU_PROSTATE_CANCER_DN	LIU_PROSTATE_CANCER_DN	219	0.275257	2.14346	3.58e-07	2.65e-05	2.23e-05	1567	tags=34%, list=19%, signal=28%	NELL2/NDNF/ITGA1/MAGI2-AS3/SNX7/KITLG/HLF/CNRIP1/FCGBP/FLRT3/COL9A1/CRABP1/PGAP4/SORBS1/KLF8/GALNT10/NR3C2/ACTA2/PDK4/PGF/COL4A2/ARMCX4/MUC4/KCNJ8/TSC22D3/PLEKHH2/CDC42EP3/SPATA18/ABCC3/EPHA2/SYNPO2/ADCY4/VAV3/EFEMP1/PPIC/COL4A6/MASP1/INPP1/SLC16A14/CSRP1/TRIM29/MIR100HG/COL13A1/LTBP1/TCEAL2/PREX2/CEACAM6/PDGFC/MET/PGM5/GPRASP1/CCDC136/DKK3/COL4A1/TNS1/CLMP/PRRX1/DMKN/MYH11/SH3BGRL/GJC1/ANXA2/SLF…
EPPERT_HSC_R	EPPERT_HSC_R	EPPERT_HSC_R	57	0.372586	2.14324	0.000438998	0.0103112	0.00866067	2838	tags=65%, list=34%, signal=43%	ABCB1/MLLT3/HLF/ALCAM/FAM169A/DRAM1/RBM7/GCNT2/HOPX/ITSN2/TCEAL9/RUNX2/PNISR/CYLD/KBTBD8/TFPI/ADGRG6/ELK3/NPR3/DDX5/ATP8B4/FRMD4B/C2orf69/HOXB3/PLSCR4/DACH1/MSI2/YES1/RCSD1/FAM3C/CD109/SLC25A36/RGCC/ZDHHC21/DNAJB9/DST/CRIM1
GOBP_PHOSPHATIDYLINOSITOL_3_KINASE_SIGNALING	GOBP_PHOSPHATIDYLINOSITOL_3_KINASE_SIGNALING	GOBP_PHOSPHATIDYLINOSITOL_3_KINASE_SIGNALING	51	0.384603	2.14148	0.000291178	0.00733534	0.00616116	2593	tags=61%, list=31%, signal=42%	BTN2A2/FGF2/MYO16/PTPN13/SERPINE2/BECN1/EGF/NTRK3/F2RL1/FN1/IGF1/NTRK2/ERBB4/EGFR/PREX2/PDGFC/CD160/RELN/ERBB3/PIK3CB/TREM2/PEAR1/HGF/DIPK2A/NYAP1/PTEN/KDR/CEP55/NEDD4/PIK3C2G/PIK3C2A
PID_TCPTP_PATHWAY	PID_TCPTP_PATHWAY	PID_TCPTP_PATHWAY	21	0.508028	2.13981	0.00105947	0.0198917	0.0167076	2351	tags=71%, list=28%, signal=51%	ITGA1/STAT6/EGF/EGFR/MET/EIF2AK2/PTPN2/STAT3/PIK3CB/CSF1R/HGF/SOS1/KPNB1/PIAS1/KDR
GOBP_POSITIVE_REGULATION_OF_OSSIFICATION	GOBP_POSITIVE_REGULATION_OF_OSSIFICATION	GOBP_POSITIVE_REGULATION_OF_OSSIFICATION	19	0.5289	2.13811	0.000961636	0.0184294	0.0154793	664	tags=42%, list=8%, signal=39%	TENT5A/ALOX5/BMPR1B/WNT4/P2RX7/SMAD3/FBN2/BMP4
WAMUNYOKOLI_OVARIAN_CANCER_GRADES_1_2_DN	WAMUNYOKOLI_OVARIAN_CANCER_GRADES_1_2_DN	WAMUNYOKOLI_OVARIAN_CANCER_GRADES_1_2_DN	31	0.440494	2.13773	0.000512727	0.0115422	0.00969463	1911	tags=52%, list=23%, signal=40%	SNCA/PPM1K/MAGI2-AS3/ZNF483/RGL1/C3/DOCK11/TCEAL2/PROCR/CLIC5/FRMD4B/SRSF5/ID4/PLSCR4/N4BP2L2/TCEAL3
WP_LUNG_FIBROSIS	WP_LUNG_FIBROSIS	WP_LUNG_FIBROSIS	22	0.493795	2.13558	0.000783021	0.0161189	0.0135387	1877	tags=59%, list=22%, signal=46%	FGF2/TIMP1/SPP1/EGF/CEBPB/IGF1/SKIL/DSP/MMP2/FGF1/STN1/NFE2L2/HGF
HP_FAT_MALABSORPTION	HP_FAT_MALABSORPTION	HP_FAT_MALABSORPTION	20	0.515925	2.13508	0.00103116	0.0194519	0.0163382	1575	tags=55%, list=19%, signal=45%	LIPA/CCDC47/PKHD1/BAAT/PTRH2/SBDS/CLMP/MTTP/CFTR/SRP54/CYP7B1
GRAHAM_CML_DIVIDING_VS_NORMAL_QUIESCENT_DN	GRAHAM_CML_DIVIDING_VS_NORMAL_QUIESCENT_DN	GRAHAM_CML_DIVIDING_VS_NORMAL_QUIESCENT_DN	30	0.447926	2.13456	0.000530437	0.0117938	0.00990592	2153	tags=53%, list=26%, signal=40%	MLLT3/HLF/ALOX5/ENPP4/H1-0/HCP5/SELL/TCEAL2/TFPI/ADGRG6/TRIM22/IFI16/CXCL3/GLIPR1/HLA-DPA1/PTPRC
GOBP_RESPONSE_TO_IRON_ION	GOBP_RESPONSE_TO_IRON_ION	GOBP_RESPONSE_TO_IRON_ION	11	0.633227	2.13441	0.00116311	0.0213823	0.0179596	610	tags=64%, list=7%, signal=59%	SNCA/DRD2/BECN1/ABAT/HFE/CYBRD1/B2M
HALLMARK_KRAS_SIGNALING_UP	HALLMARK_KRAS_SIGNALING_UP	HALLMARK_KRAS_SIGNALING_UP	70	0.345477	2.13331	0.00025047	0.00653515	0.00548906	2167	tags=46%, list=26%, signal=34%	KIF5C/HDAC9/ABCB1/TPH1/DOCK2/SPP1/IL2RG/MMD/SCG5/ITGBL1/PSMB8/F2RL1/PRKG2/PRELID3B/PLAT/TFPI/PRRX1/RELN/NRP1/GPNMB/PECAM1/STRN/PCP4/SPON1/TRIB1/CROT/F13A1/ITGA2/USP12/SNAP91/CA2/ERO1A
ACEVEDO_LIVER_CANCER_WITH_H3K27ME3_UP	ACEVEDO_LIVER_CANCER_WITH_H3K27ME3_UP	ACEVEDO_LIVER_CANCER_WITH_H3K27ME3_UP	92	0.330708	2.13276	6.04e-05	0.00214465	0.00180135	2198	tags=48%, list=26%, signal=36%	LRCH2/KIF5C/DYNC2H1/MACROH2A2/MLLT3/SLC35F2/TNIK/ENDOD1/LMO2/CEP126/PKHD1L1/BMPR1B/OSBPL10/TENM3/C3orf52/SV2C/ELMOD1/COLEC12/ADGRF1/MAGEH1/HECW2/ESRP1/GNPDA2/SYT14/MAST4/NAV3/PDE1A/LINC02210/FAM189A2/NCALD/HSPB3/STK26/FUT8/NUTM1/MIR99AHG/PALLD/CREB5/LCA5/TMPRSS7/MCOLN3/TBC1D30/FRAS1/PTEN/COL1A2
HP_OLIGOSPERMIA	HP_OLIGOSPERMIA	HP_OLIGOSPERMIA	13	0.603337	2.13142	0.000793088	0.0162336	0.013635	1783	tags=69%, list=21%, signal=55%	DDX3Y/NR3C1/DNAH10/ANTXR1/CFAP70/CFTR/BLM/LHCGR/CFAP65
FARMER_BREAST_CANCER_CLUSTER_5	FARMER_BREAST_CANCER_CLUSTER_5	FARMER_BREAST_CANCER_CLUSTER_5	16	0.568442	2.12396	0.000573999	0.0124554	0.0104617	941	tags=50%, list=11%, signal=44%	PPM1D/RPS6KB1/VMP1/RAD51C/RNF43/PTRH2/MED13/DHX40
SCHUETZ_BREAST_CANCER_DUCTAL_INVASIVE_UP	SCHUETZ_BREAST_CANCER_DUCTAL_INVASIVE_UP	SCHUETZ_BREAST_CANCER_DUCTAL_INVASIVE_UP	148	0.292465	2.12059	9.07e-06	0.000442303	0.000371503	2531	tags=51%, list=30%, signal=36%	MERTK/SERPINE2/KCTD12/ALOX5/FZD2/TM6SF1/TGFBI/FAS/LMO2/COL15A1/TLE4/COL4A2/THY1/C1orf54/SCG5/SKAP2/COL6A3/ITGBL1/SGCD/COLEC12/DNM3/RGS4/FBN2/PPIC/FN1/PROS1/PLCG2/PSMB9/MMP2/QKI/SAMD4A/COL4A1/HLA-DMB/COL1A1/ADAM12/NID2/PRRX1/NRP1/GPNMB/PECAM1/FXYD5/ELK3/CDH11/LAMA4/ABCC4/SPON1/TRIM22/PTPRM/MFAP5/IFI16/CD74/MXRA8/ATP10D/PALLD/PLSCR4/MEF2C/GLIPR1/THSD7A/MSR1/SDC2/HLA-DPA1/PTEN/PTPRC/COL1A2/SGCB/ZFPM…
GOBP_POSITIVE_REGULATION_OF_BIOMINERALIZATION	GOBP_POSITIVE_REGULATION_OF_BIOMINERALIZATION	GOBP_POSITIVE_REGULATION_OF_BIOMINERALIZATION	20	0.511712	2.11764	0.00121492	0.02208	0.0185456	684	tags=45%, list=8%, signal=41%	TENT5A/ALOX5/BMPR1B/WNT4/P2RX7/SMAD3/FBN2/BMP4/CEBPB
KONDO_EZH2_TARGETS	KONDO_EZH2_TARGETS	KONDO_EZH2_TARGETS	77	0.337672	2.11756	0.000152708	0.00446899	0.00375363	1476	tags=39%, list=18%, signal=32%	TMTC1/MYO16/HLF/NEGR1/HSD17B2/ARHGEF3/CRISPLD1/PRSS35/SUSD4/ITGBL1/ABI3BP/GLP1R/MYEF2/SCN2A/CNTNAP3/PRR16/EGFR/SAMD4A/UBXN10/COL1A1/RNPC3/CAP2/TFPI/NRP1/EDIL3/DSEL/EPHA5/KCNMA1/CSGALNACT2/GAL3ST1
BRACHAT_RESPONSE_TO_CISPLATIN	BRACHAT_RESPONSE_TO_CISPLATIN	BRACHAT_RESPONSE_TO_CISPLATIN	13	0.599375	2.11743	0.000862051	0.0171586	0.014412	1105	tags=54%, list=13%, signal=47%	ABLIM1/TOB1/TXNIP/MDM2/VMP1/TP53INP1/MALAT1
TAKEDA_TARGETS_OF_NUP98_HOXA9_FUSION_10D_DN	TAKEDA_TARGETS_OF_NUP98_HOXA9_FUSION_10D_DN	TAKEDA_TARGETS_OF_NUP98_HOXA9_FUSION_10D_DN	51	0.3801	2.11641	0.000383699	0.00927388	0.00778939	1973	tags=47%, list=24%, signal=36%	MSC-AS1/TMTC1/MAGI2-AS3/RGL1/ME1/TGFBI/PDK4/PTGER3/FRMD4A/ADTRP/SGTB/CEACAM6/NRP1/GPNMB/CHI3L1/FCHO2/A2M/TREM2/PPP2R2B/STAB1/CXCL3/F13A1/SRPX/DACH1
GRAHAM_CML_QUIESCENT_VS_NORMAL_QUIESCENT_DN	GRAHAM_CML_QUIESCENT_VS_NORMAL_QUIESCENT_DN	GRAHAM_CML_QUIESCENT_VS_NORMAL_QUIESCENT_DN	15	0.57527	2.11521	0.000880733	0.0174025	0.0146169	1189	tags=53%, list=14%, signal=46%	MLLT3/HLF/ALOX5/H1-0/SELL/AIF1/HLA-DMB/ADGRG6
GOBP_REGULATION_OF_ANION_TRANSPORT	GOBP_REGULATION_OF_ANION_TRANSPORT	GOBP_REGULATION_OF_ANION_TRANSPORT	37	0.410034	2.11471	0.00132012	0.0233185	0.0195858	1351	tags=43%, list=16%, signal=36%	SNCA/ABCB1/ABAT/P2RX7/PLA2R1/RGS4/PRKG2/CEBPB/GRM5/PRKAA1/KMO/SLC34A1/CFTR/FGF23/SLC6A1/TRH
JAEGER_METASTASIS_DN	JAEGER_METASTASIS_DN	JAEGER_METASTASIS_DN	88	0.331351	2.11455	7.93e-05	0.00268473	0.00225498	1358	tags=36%, list=16%, signal=31%	ABLIM1/QPCT/HLF/FCGBP/PCSK2/TXNIP/EXPH5/FAT2/MYO6/LAMA3/ABCC3/AKR1B10/HOPX/F2RL1/COL4A6/SPINK5/NTRK2/DSP/EGFR/TRIM29/ABCA12/KRT10/PERP/IRF6/GRHL2/KLF5/ENPP2/MAST4/PPL/DSG1/NMU/COL17A1
CHICAS_RB1_TARGETS_CONFLUENT	CHICAS_RB1_TARGETS_CONFLUENT	CHICAS_RB1_TARGETS_CONFLUENT	271	0.260482	2.11047	3.32e-07	2.52e-05	2.11e-05	1578	tags=33%, list=19%, signal=28%	TMTC1/CMBL/KCTD16/LIPA/MAGI2-AS3/SNX7/SYTL2/CAMK2N1/FZD2/MFGE8/SIPA1L2/SIX1/DUBR/ICA1/GALNT10/NR3C2/ACTA2/SKA2/COL15A1/LMO7/FAM171B/LARP6/ARHGAP18/ABAT/LIN7A/STK17A/THY1/PRSS35/SCUBE3/CDC42EP3/KDM1B/ITGBL1/ABI3BP/SMAD3/EPB41L2/CHML/SGCD/SYNPO2/SLC9A7/F2RL1/IL17RD/UACA/FBN2/BMP4/FN1/SCN7A/RRAS2/UTRN/NALCN/PSMB9/VAT1L/RGS17/C7/INHBE/VGLL3/SAMD9L/FRZB/OSBPL3/GALNT5/CCDC80/ADH1B/TENT5C/COL1A1/DDX60/T…
HP_HEMOPTYSIS	HP_HEMOPTYSIS	HP_HEMOPTYSIS	25	0.468855	2.10693	0.00115956	0.0213823	0.0179596	2371	tags=60%, list=28%, signal=43%	F5/ERAP1/FAS/ACTA2/SMAD3/HLA-B/HEY2/CFTR/MYH11/TLL1/MFAP5/STAT4/HLA-DPA1/HLA-DPB1/MLX
HP_PRURITUS	HP_PRURITUS	HP_PRURITUS	45	0.388282	2.10655	0.000810336	0.0165241	0.0138791	1667	tags=49%, list=20%, signal=39%	LIPA/ABCB4/CCDC47/IL2RG/PKHD1/DCDC2/BAAT/PLCG2/DSP/PTPN3/ABCA12/PERP/TNFSF15/CFTR/STAT3/GPNMB/RUNX1/NIPAL4/SCN10A/CYP7B1/FLG2/TRPV3
BLANCO_MELO_INFLUENZA_A_INFECTION_A594_CELLS_UP	BLANCO_MELO_INFLUENZA_A_INFECTION_A594_CELLS_UP	BLANCO_MELO_INFLUENZA_A_INFECTION_A594_CELLS_UP	14	0.584141	2.10505	0.000671106	0.0142485	0.0119677	2849	tags=86%, list=34%, signal=57%	DHX58/TMED7/CISD2/TIMD4/KLF10/PMAIP1/CPM/THAP10/C1D/TMEM170B/LINC00672/NDUFC2
GOBP_POSITIVE_REGULATION_OF_VASCULAR_ENDOTHELIAL_GROWTH_FACTOR_PRODUCTION	GOBP_POSITIVE_REGULATION_OF_VASCULAR_ENDOTHELIAL_GROWTH_FACTOR_PRODUCTION	GOBP_POSITIVE_REGULATION_OF_VASCULAR_ENDOTHELIAL_GROWTH_FACTOR_PRODUCTION	13	0.594445	2.10001	0.000999978	0.0189961	0.0159553	1617	tags=62%, list=19%, signal=50%	ISL1/CYP1B1/C5/HPSE/C3/ADORA2B/EIF2AK3/BRCA1
GOTZMANN_EPITHELIAL_TO_MESENCHYMAL_TRANSITION_UP	GOTZMANN_EPITHELIAL_TO_MESENCHYMAL_TRANSITION_UP	GOTZMANN_EPITHELIAL_TO_MESENCHYMAL_TRANSITION_UP	25	0.467291	2.0999	0.00122458	0.0221458	0.0186009	1746	tags=56%, list=21%, signal=44%	TIMP1/ABCB1/ACTA2/COL4A2/CYP1B1/PPIC/FN1/PROS1/TNC/COL4A1/COL1A1/CLU/BRCA1/DCK
MCBRYAN_PUBERTAL_BREAST_5_6WK_UP	MCBRYAN_PUBERTAL_BREAST_5_6WK_UP	MCBRYAN_PUBERTAL_BREAST_5_6WK_UP	48	0.37976	2.09953	0.000555638	0.0122785	0.010313	1812	tags=52%, list=22%, signal=41%	LIPA/KITLG/PCOLCE2/ST6GALNAC5/SPP1/SNRNP27/PDK4/TLCD4/MLPH/PAWR/OCLN/SIAH2/PSIP1/GALNT7/PDGFC/DSG2/KLF5/SLC15A2/ERBB3/PKP2/STXBP6/CCNK/CLU/RNF2/SFTPB
DAZARD_RESPONSE_TO_UV_SCC_UP	DAZARD_RESPONSE_TO_UV_SCC_UP	DAZARD_RESPONSE_TO_UV_SCC_UP	50	0.378272	2.09706	0.000335335	0.00827108	0.00694711	3313	tags=70%, list=40%, signal=42%	TOB1/DYNLT3/TSC22D3/HEXIM1/AIMP1/B2M/PLSCR1/RAD51C/TMED7/DSG2/KYNU/SH3BGRL/ANXA2/SCFD1/PMAIP1/GADD45A/CXCL3/AP1S2/TWF1/ATF3/PAPOLA/SLC25A46/YWHAZ/PRKAR1A/SSR1/SDHD/RCN2/LAMP2/IL13RA1/PTGES3/TM2D1/COPB1/NAP1L1/TNF/SRSF1
RODWELL_AGING_KIDNEY_NO_BLOOD_UP	RODWELL_AGING_KIDNEY_NO_BLOOD_UP	RODWELL_AGING_KIDNEY_NO_BLOOD_UP	100	0.317881	2.09661	5.89e-05	0.00209957	0.00176348	1665	tags=39%, list=20%, signal=32%	TIMP1/ITGA1/SERPINE2/SYTL2/MFGE8/GPX8/ZMAT3/COL15A1/SETD7/DRAM1/ANTXR1/COL6A3/ABCC3/PLK2/ABI3BP/DCDC2/FN1/C3/GFRA1/VTCN1/C7/TNC/PDGFC/LACC1/DKK3/COL1A1/MRC1/TFPI/GPNMB/ANXA2/PRICKLE1/SPTLC3/CDH11/A2M/SPON1/BHLHE41/NFKBIZ/STAB1/TMPRSS4
GOBP_REGULATION_OF_PHOSPHATIDYLINOSITOL_3_KINASE_SIGNALING	GOBP_REGULATION_OF_PHOSPHATIDYLINOSITOL_3_KINASE_SIGNALING	GOBP_REGULATION_OF_PHOSPHATIDYLINOSITOL_3_KINASE_SIGNALING	38	0.405835	2.09532	0.0010295	0.0194519	0.0163382	1289	tags=42%, list=15%, signal=36%	BTN2A2/FGF2/PTPN13/SERPINE2/BECN1/EGF/NTRK3/F2RL1/FN1/IGF1/NTRK2/ERBB4/EGFR/PDGFC/RELN/ERBB3
CREIGHTON_ENDOCRINE_THERAPY_RESISTANCE_3	CREIGHTON_ENDOCRINE_THERAPY_RESISTANCE_3	CREIGHTON_ENDOCRINE_THERAPY_RESISTANCE_3	310	0.252129	2.094	1.45e-07	1.19e-05	9.96e-06	2391	tags=44%, list=29%, signal=32%	TMTC1/LIPA/PTPN13/SNX7/F5/GSAP/FCGBP/RGL1/GCC2/SYNJ2/TMEM263/B4GALT6/RFK/SLC25A27/DENND2D/STK39/OSBPL10/CYP1B1/ACBD3/DRAM1/CCDC186/PLEKHH2/CASP7/ADRB1/SEC62/CDC42EP3/PCTP/ABCC3/STEAP2/ZNF652/GXYLT1/MANSC1/RAB6B/ADGRF1/BCAS1/DTX4/NME7/TAX1BP1/FBN2/ARFGEF3/ARNTL2/POPDC3/CEBPB/NAMPT/C3/DOCK11/INPP1/TMED7/TMED5/NSF/SLC16A14/TMF1/SERPINB9P1/PTPN3/CLDN12/DPY19L2/RGS17/CEACAM6/GALNT7/EAF2/GALNT5/TNFSF15…
GOBP_RESPONSE_TO_HEAT	GOBP_RESPONSE_TO_HEAT	GOBP_RESPONSE_TO_HEAT	42	0.392019	2.09397	0.000563606	0.0124039	0.0104184	1446	tags=43%, list=17%, signal=36%	ST8SIA1/RPS6KB1/CHORDC1/DNAJB4/ATXN3/NOS1/TP53INP1/DNAJC7/IGF1/STAC/PSIP1/DNAJC2/MAPT/MICA/SLU7/FGF1/CD34/MICB
DACOSTA_UV_RESPONSE_VIA_ERCC3_COMMON_DN	DACOSTA_UV_RESPONSE_VIA_ERCC3_COMMON_DN	DACOSTA_UV_RESPONSE_VIA_ERCC3_COMMON_DN	197	0.271699	2.09312	6.16e-06	0.00032923	0.00027653	3544	tags=64%, list=42%, signal=38%	KIF5C/FGF2/FAM169A/GOLGA4/TLE4/NR3C1/STK39/PAWR/TLK2/CD2AP/PKN2/SMURF2/RGS7/SMAD3/ITSN2/SLC4A7/IL1RAP/DNAJC13/RRAS2/MED13/EGFR/RB1/ASCC3/PIBF1/KIF20B/PNISR/QKI/SAMD4A/CEP135/SMC5/TLK1/FAT1/NPEPPS/PTPN2/KLF10/CAP2/ADGRG6/UTP18/BLM/SEMA5A/CDC27/AKAP9/RUNX1/RAB6A/REV3L/EPHA4/PPP2R2A/CENPE/PPP1R12A/NPIPB5/UBL3/NEK7/FUT8/BRCA1/PPM1B/PTPN12/PJA2/CNOT4/PDE8A/JARID2/MYBL1/SEC24A/GNAQ/ZMYM2/SOS1/SLK/USP12…
NABA_MATRISOME	NABA_MATRISOME	NABA_MATRISOME	300	0.254531	2.09295	8.48e-08	7.23e-06	6.07e-06	1729	tags=36%, list=21%, signal=30%	NELL2/FGF2/NDNF/TIMP1/KITLG/PAPPA/ADAM23/SERPINE2/COL9A1/SERPINB6/PCOLCE2/MFGE8/HHIP/TCHH/TGFBI/COL25A1/SPP1/SERPINI2/COL15A1/PGF/SLIT3/COL4A2/MUC4/CRISPLD1/COL24A1/IL16/SCUBE3/WNT4/MUC3A/NGLY1/EGF/COL6A3/LAMA3/ABI3BP/FGF14/COLEC12/FREM2/COL22A1/ACAN/EFEMP1/MUC16/HPSE/FBN2/BMP4/FN1/COL4A6/MASP1/IGF1/ADAMTS9/SCUBE1/SERPINB9/PARM1/VWC2/COL13A1/MMP2/LTBP1/INHBE/WNT8A/TNC/FRZB/PDGFC/SVEP1/C1QL3/TNFSF…
GOBP_DENDRITIC_CELL_DIFFERENTIATION	GOBP_DENDRITIC_CELL_DIFFERENTIATION	GOBP_DENDRITIC_CELL_DIFFERENTIATION	11	0.620839	2.09265	0.00165181	0.0276442	0.0232191	2695	tags=91%, list=32%, signal=62%	F2RL1/HLA-B/CEBPB/TREM2/CAMK4/NOTCH2/RELB/TRPM2/CCR7/RBPJ
GOBP_POSITIVE_REGULATION_OF_RESPONSE_TO_EXTERNAL_STIMULUS	GOBP_POSITIVE_REGULATION_OF_RESPONSE_TO_EXTERNAL_STIMULUS	GOBP_POSITIVE_REGULATION_OF_RESPONSE_TO_EXTERNAL_STIMULUS	133	0.297052	2.08613	2.07e-05	0.000893749	0.000750685	1736	tags=38%, list=21%, signal=31%	SNCA/FGF2/CAMK2N1/PAK3/PGF/CNR1/PTGER3/STK39/HEXIM1/S1PR1/IL16/RIPOR2/DHX58/SMAD3/NTRK3/USP29/F2RL1/TRIM5/PLSCR1/CEBPB/C3/PLCG2/ADORA2B/MET/AIF1/NLRC5/TNFRSF1A/PYHIN1/PDE2A/DDX60/TRIM56/CD160/CDH13/NRP1/SEMA5A/LTA/C2CD4B/MGST2/OPRM1/CSF1R/CAMK1D/TREM2/NLRP1/USP15/PARP9/CLNK/IFI16/NFKBIZ/CD74/PGC/CD47
GOBP_DOPAMINE_SECRETION	GOBP_DOPAMINE_SECRETION	GOBP_DOPAMINE_SECRETION	17	0.541363	2.08418	0.00073004	0.0152017	0.0127683	1454	tags=59%, list=17%, signal=49%	SNCA/DRD2/SYT13/CNR1/ABAT/SNCG/SYT5/SYT17/OPRK1/KCNA2
GOBP_POSITIVE_REGULATION_OF_NEUROTRANSMITTER_TRANSPORT	GOBP_POSITIVE_REGULATION_OF_NEUROTRANSMITTER_TRANSPORT	GOBP_POSITIVE_REGULATION_OF_NEUROTRANSMITTER_TRANSPORT	10	0.648375	2.08409	0.00248204	0.0359836	0.0302236	914	tags=50%, list=11%, signal=45%	SNCA/DRD2/STX1B/CNR1/KMO
GOBP_REGULATION_OF_BONE_MINERALIZATION	GOBP_REGULATION_OF_BONE_MINERALIZATION	GOBP_REGULATION_OF_BONE_MINERALIZATION	28	0.449406	2.08351	0.0010619	0.0198917	0.0167076	1136	tags=43%, list=14%, signal=37%	TENT5A/ALOX5/BMPR1B/S1PR1/WNT4/P2RX7/SMAD3/FBN2/BMP4/NBR1/FGF23/TXLNG
REACTOME_FORMATION_OF_THE_CORNIFIED_ENVELOPE	REACTOME_FORMATION_OF_THE_CORNIFIED_ENVELOPE	REACTOME_FORMATION_OF_THE_CORNIFIED_ENVELOPE	19	0.51523	2.08285	0.00156848	0.0264954	0.0222542	2419	tags=68%, list=29%, signal=49%	TCHH/SPINK5/DSP/KRT10/PERP/DSG2/PPL/DSG1/PKP2/FLG/KAZN/KRT15/KRT7
GOBP_NEGATIVE_REGULATION_OF_COAGULATION	GOBP_NEGATIVE_REGULATION_OF_COAGULATION	GOBP_NEGATIVE_REGULATION_OF_COAGULATION	11	0.617099	2.08004	0.00184728	0.0300788	0.025264	1395	tags=73%, list=17%, signal=61%	SERPINE2/ABAT/ADTRP/PROS1/PROCR/PLAT/TFPI/CD34
VANHARANTA_UTERINE_FIBROID_DN	VANHARANTA_UTERINE_FIBROID_DN	VANHARANTA_UTERINE_FIBROID_DN	29	0.444535	2.07826	0.001259	0.0224957	0.0188948	2156	tags=62%, list=26%, signal=46%	ABLIM1/GSAP/ERAP1/NR3C1/PTGER3/PAWR/RIPOR2/NAMPT/LTBP1/ADH1B/KLF5/ABCA8/TFPI/TRIB1/STK26/ATF3/KLHL2/MDFIC
GOMF_GROWTH_FACTOR_ACTIVITY	GOMF_GROWTH_FACTOR_ACTIVITY	GOMF_GROWTH_FACTOR_ACTIVITY	35	0.410466	2.07821	0.000886082	0.0174445	0.0146521	1130	tags=40%, list=14%, signal=35%	FGF2/TIMP1/KITLG/PGF/HDGFL3/EGF/FGF14/EFEMP1/BMP4/IGF1/INHBE/PDGFC/FGF1/FGF23
GOCC_CELL_SURFACE	GOCC_CELL_SURFACE	GOCC_CELL_SURFACE	316	0.249286	2.07713	2.98e-07	2.27e-05	1.91e-05	1467	tags=31%, list=18%, signal=27%	BTN2A2/ABCB1/ITGA1/GLRA1/ALCAM/SERPINE2/NGFR/HMMR/IL12RB2/MFGE8/HHIP/DPP4/CA4/RPS6KB1/BTN3A1/ITGAM/FAS/BTN3A2/PSEN2/LMO7/IL2RG/THY1/SPN/LIPG/S1PR1/SCUBE3/WNT4/ANTXR1/AIMP1/HHLA2/HFE/ITGBL1/BTN3A3/P2RX7/BTN1A1/PLA2R1/EPHA2/PKHD1/B2M/HLA-B/HLA-C/TREML4/CD302/CD36/TMC1/C3/ITGA11/ADAMTS9/ITGAX/GFRA1/ADTRP/SCUBE1/PRLR/VTCN1/EGFR/STAB2/FCRL3/CEACAM6/CD200R1/KRT10/RGMA/ADCYAP1R1/PDGFC/MET/PROCR/DSG2/SLC…
PYEON_CANCER_HEAD_AND_NECK_VS_CERVICAL_UP	PYEON_CANCER_HEAD_AND_NECK_VS_CERVICAL_UP	PYEON_CANCER_HEAD_AND_NECK_VS_CERVICAL_UP	73	0.334346	2.07426	0.000204423	0.0056611	0.00475492	4222	tags=86%, list=51%, signal=43%	OCLN/CHML/SKIL/SHOC1/PSIP1/CEP152/UPF3B/TSIX/ZRSR2/JPX/FAM199X/FGFR1OP2/PMAIP1/RASEF/CCDC18/ZNF678/GRAMD1C/HOXB3/FMR1/PLSCR4/ESR1/ZBTB21/LNPK/KLHL2/NR1D2/PARD6B/GAS2L3/ARHGAP5/SNRPA1/ATP8B1/CDKN2B/MCPH1/NUF2/NEK2/PRPF39/SLC35A3/CXADR/CENPK/DR1/HNRNPU/C18orf54/BRIP1/ZBTB8A/CCNL1/U2SURP/THAP9-AS1/SMC4/FNBP1L/SCML1/CCDC150/EZH2/ODF2L/DDX3X/PAXBP1/RAD51AP1/SPICE1/SYNJ1/MSL2/PPM1A/NSD3/HELLS/FAM72C/PI…
KUROZUMI_RESPONSE_TO_ONCOCYTIC_VIRUS	KUROZUMI_RESPONSE_TO_ONCOCYTIC_VIRUS	KUROZUMI_RESPONSE_TO_ONCOCYTIC_VIRUS	12	0.604222	2.07238	0.00185891	0.0301773	0.0253467	3312	tags=100%, list=40%, signal=60%	ITGAM/SPP1/IL2RG/IL16/C3/LTA/CCR7/IL13RA1/IL6ST/IL10RA/TNFRSF1B/TNF
KEGG_CALCIUM_SIGNALING_PATHWAY	KEGG_CALCIUM_SIGNALING_PATHWAY	KEGG_CALCIUM_SIGNALING_PATHWAY	70	0.335355	2.07081	0.000464476	0.0107926	0.00906499	1907	tags=47%, list=23%, signal=37%	ITPR2/CCKBR/PLCB2/PTGER3/NOS1/ADRB1/NOS2/P2RX7/CACNA1A/ADCY4/GRM5/ERBB4/PLCG2/EGFR/ADORA2B/CD38/TNNC2/PLCD3/PDE1A/ERBB3/LHCGR/RYR3/TACR3/CACNA1D/CHRM5/PTAFR/CAMK4/PHKA1/GNAL/PLCB4/GNAQ/HTR4/P2RX5
BERTUCCI_INVASIVE_CARCINOMA_DUCTAL_VS_LOBULAR_DN	BERTUCCI_INVASIVE_CARCINOMA_DUCTAL_VS_LOBULAR_DN	BERTUCCI_INVASIVE_CARCINOMA_DUCTAL_VS_LOBULAR_DN	20	0.500082	2.06952	0.00188873	0.0304912	0.0256104	3271	tags=80%, list=39%, signal=49%	NGFR/TXNIP/PDK4/IGF1/NECAB1/PECAM1/CD34/TF/ALDH1L1/ABCA6/RCSD1/FOXN3/CCDC82/POU2F2/MARCHF7/TNFRSF1B
GOBP_DETECTION_OF_MECHANICAL_STIMULUS_INVOLVED_IN_SENSORY_PERCEPTION	GOBP_DETECTION_OF_MECHANICAL_STIMULUS_INVOLVED_IN_SENSORY_PERCEPTION	GOBP_DETECTION_OF_MECHANICAL_STIMULUS_INVOLVED_IN_SENSORY_PERCEPTION	12	0.603184	2.06882	0.00201482	0.0313906	0.0263658	1861	tags=67%, list=22%, signal=52%	SERPINE2/TRPA1/PHF24/TMC1/TMC2/PIEZO2/LHFPL5/ITGA2
BOQUEST_STEM_CELL_UP	BOQUEST_STEM_CELL_UP	BOQUEST_STEM_CELL_UP	103	0.308972	2.0685	0.000133524	0.00404984	0.00340158	2410	tags=51%, list=29%, signal=37%	TIMP1/PTPN13/SERPINE2/PCOLCE2/PDLIM3/SLIT3/LRP1B/COL6A3/ITGBL1/CYBRD1/ABI3BP/SGCD/COLEC12/EFEMP1/CD302/CEBPB/C3/IGF1/NTRK2/PRR16/EGFR/MMP2/C7/TNC/SVEP1/ADH1B/COL1A1/FAT1/ABCA8/PRRX1/MYH11/GPNMB/CHL1/PPL/CDH11/ATP8B4/BHLHE41/MFAP5/MXRA8/NOTCH2/SRPX/PDE4DIP/SGCE/C5orf15/ABCA6/ATP1A2/SDC2/COL1A2/NIBAN1/MEG3/ANPEP/PRELP/SHOX2
HP_BILIARY_CIRRHOSIS	HP_BILIARY_CIRRHOSIS	HP_BILIARY_CIRRHOSIS	13	0.585367	2.06794	0.00121779	0.0220875	0.0185519	1121	tags=54%, list=13%, signal=47%	ABCB4/HFE/PKHD1/DCDC2/CEACAM6/TNFSF15/CFTR
GOBP_CHLORIDE_TRANSPORT	GOBP_CHLORIDE_TRANSPORT	GOBP_CHLORIDE_TRANSPORT	50	0.372627	2.06577	0.000458736	0.0107052	0.00899155	2397	tags=56%, list=29%, signal=40%	ANO5/ABCB1/GLRA1/WNK4/SLC26A4/TTYH1/PRKG2/GRM5/BEST3/BSND/SLC4A1/CLIC5/CFTR/SLC26A7/GABRB2/SLC12A1/SLC6A1/GABRB1/PTAFR/SLC26A8/ANO4/BEST4/SLC1A1/GLRA3/CA2/ANO3/CLDN4/GABRA1
LIN_SILENCED_BY_TUMOR_MICROENVIRONMENT	LIN_SILENCED_BY_TUMOR_MICROENVIRONMENT	LIN_SILENCED_BY_TUMOR_MICROENVIRONMENT	34	0.410645	2.06193	0.00191176	0.030585	0.0256892	1465	tags=47%, list=18%, signal=39%	SYTL2/CAMK2N1/PDK4/FAM171B/MYO6/SH3TC2/ADGRF1/FUT1/MUC16/ADAMTS9/VTCN1/CEACAM6/MYH14/MINDY2/ERBB3/A2ML1
FISCHER_DIRECT_P53_TARGETS_META_ANALYSIS	FISCHER_DIRECT_P53_TARGETS_META_ANALYSIS	FISCHER_DIRECT_P53_TARGETS_META_ANALYSIS	156	0.284732	2.06189	1.44e-05	0.000661032	0.000555219	1578	tags=31%, list=19%, signal=26%	CMBL/PPM1D/F5/RGL1/MFGE8/RRM2B/GREB1/RFK/FAS/HSPA4L/EDA2R/TXNIP/ACTA2/GNAI1/ZMAT3/CDH8/NKAIN4/SESN1/HEXIM1/DRAM1/SPATA18/MDM2/PLK2/TP53INP1/SMAD3/EPHA2/FBN2/SCN2A/RAD51C/SLC25A45/CFLAR/ASCC3/ABCA12/RGMA/SLC30A1/PPP4R3A/SNX2/FBXW7/MAST4/STAT3/AKAP9/FCHO2/REV3L/TRIM22/PMAIP1/USP15/TMEM68/TRIB1/CROT
WORSCHECH_TUMOR_REJECTION_UP	WORSCHECH_TUMOR_REJECTION_UP	WORSCHECH_TUMOR_REJECTION_UP	15	0.560423	2.06062	0.00158599	0.0267493	0.0224675	2212	tags=73%, list=26%, signal=54%	ALCAM/STAT6/IL2RG/IL1RAP/IRF6/LCK/IFI16/NFKBIZ/CXCL3/MSR1/ITK
GAUSSMANN_MLL_AF4_FUSION_TARGETS_D_UP	GAUSSMANN_MLL_AF4_FUSION_TARGETS_D_UP	GAUSSMANN_MLL_AF4_FUSION_TARGETS_D_UP	21	0.488524	2.05765	0.00225591	0.0338013	0.0283907	907	tags=43%, list=11%, signal=38%	QPCT/F5/SERPINE2/DRD2/HECW1/CD302/POPDC3/MED13/PERP
THUM_SYSTOLIC_HEART_FAILURE_DN	THUM_SYSTOLIC_HEART_FAILURE_DN	THUM_SYSTOLIC_HEART_FAILURE_DN	99	0.314484	2.0556	0.000114582	0.00357549	0.00300315	2992	tags=61%, list=36%, signal=39%	PPM1K/NDUFA5/SILC1/LMO7/BMPR1B/KCNJ8/SPAG9/SUSD4/PKD1L2/ARMH4/HOPX/SLC8A1-AS1/CD36/GKAP1/CFLAR/RAB18/HEY2/MAPT/RNPC3/PTPN2/MAST4/IP6K3/ELL2/CALCOCO2/USP15/KLHL31/CPNE4/CD300LG/ZNF493/ARHGEF10/FAM126B/N4BP2L2/ZBTB21/DOCK5/PPTC7/SOS1/NBEAL1/MPP3/BBIP1/INAVA/STOX2/NIBAN1/WASL/CA14/YWHAZ/SLC25A36/CPEB4/ZNF148/THSD4/SNHG14/PPP1R2/CEP350/CAPZA2/BBX/SCAF11/CYCS/TM2D1/KHDC4/GNRH1/ZNF131
GOBP_SINGLE_FERTILIZATION	GOBP_SINGLE_FERTILIZATION	GOBP_SINGLE_FERTILIZATION	30	0.431306	2.05536	0.000906993	0.0176635	0.0148361	1216	tags=43%, list=15%, signal=37%	GLRA1/MFGE8/SPESP1/RIMS1/PLB1/TRPC3/ZAN/NPM2/CCDC136/PLAT/ADAM5/ADAM32/SPAG1
PID_INTEGRIN3_PATHWAY	PID_INTEGRIN3_PATHWAY	PID_INTEGRIN3_PATHWAY	23	0.466321	2.05476	0.00221207	0.0334063	0.0280589	2416	tags=70%, list=29%, signal=50%	TGFBI/SPP1/THY1/FN1/COL4A6/TNC/COL4A1/COL1A1/EDIL3/PECAM1/LAMA4/CD47/COL1A2/KDR/LAMC1/COL4A5
TAKEDA_TARGETS_OF_NUP98_HOXA9_FUSION_10D_UP	TAKEDA_TARGETS_OF_NUP98_HOXA9_FUSION_10D_UP	TAKEDA_TARGETS_OF_NUP98_HOXA9_FUSION_10D_UP	62	0.346191	2.05136	0.000522663	0.011693	0.00982125	1814	tags=44%, list=22%, signal=34%	ABLIM1/SERPINE2/NEGR1/TMEM255A/CALB1/GNAI1/ADRB1/CDC42EP3/HOPX/SCN2A/FN1/SAMD9L/SLC6A13/CD38/OAS3/SLITRK4/EIF2AK2/DDX60/BEND6/XAF1/STXBP6/PLD4/TEX9/CLNK/HOXB3/PALLD/AFF3
GOMF_GLYCOSAMINOGLYCAN_BINDING	GOMF_GLYCOSAMINOGLYCAN_BINDING	GOMF_GLYCOSAMINOGLYCAN_BINDING	73	0.330572	2.05085	0.000235016	0.00623936	0.00524061	1268	tags=36%, list=15%, signal=30%	NELL2/FGF2/NDNF/SERPINE2/HMMR/PCOLCE2/COL25A1/PGF/SLIT3/APOB/LIPG/GREM2/ACAN/BMP4/FN1/MPO/STAB2/COL13A1/SELL/LYVE1/CCDC80/FGF1/HAPLN3/NRP1/GPNMB/SEMA5A
KIM_GERMINAL_CENTER_T_HELPER_UP	KIM_GERMINAL_CENTER_T_HELPER_UP	KIM_GERMINAL_CENTER_T_HELPER_UP	21	0.486426	2.04882	0.0025089	0.0363186	0.030505	2405	tags=71%, list=29%, signal=51%	ZMAT3/STK39/PAWR/MAN1A1/CHI3L2/CD84/IQGAP1/KLHL6/KSR2/AP1S2/UTP3/GET1/TMEM64/MFSD6/SLC25A46
GOBP_NEGATIVE_REGULATION_OF_BLOOD_PRESSURE	GOBP_NEGATIVE_REGULATION_OF_BLOOD_PRESSURE	GOBP_NEGATIVE_REGULATION_OF_BLOOD_PRESSURE	14	0.568499	2.04869	0.00122714	0.0221458	0.0186009	464	tags=43%, list=6%, signal=41%	DRD2/CNR1/NOS1/ABAT/ADRB1/NOS2
HP_TOXEMIA_OF_PREGNANCY	HP_TOXEMIA_OF_PREGNANCY	HP_TOXEMIA_OF_PREGNANCY	10	0.636689	2.04652	0.00383225	0.0486725	0.0408814	237	tags=40%, list=3%, signal=39%	ABCB4/F5/HELLPAR/NR3C2
REACTOME_NITRIC_OXIDE_STIMULATES_GUANYLATE_CYCLASE	REACTOME_NITRIC_OXIDE_STIMULATES_GUANYLATE_CYCLASE	REACTOME_NITRIC_OXIDE_STIMULATES_GUANYLATE_CYCLASE	11	0.607144	2.04649	0.002377	0.0351134	0.0294927	1872	tags=73%, list=22%, signal=56%	NOS1/NOS2/PRKG2/PDE2A/GUCY1A2/PDE1A/KCNMA1/GUCY1B1
GOCC_MYOSIN_FILAMENT	GOCC_MYOSIN_FILAMENT	GOCC_MYOSIN_FILAMENT	10	0.636667	2.04645	0.00383225	0.0486725	0.0408814	2518	tags=90%, list=30%, signal=63%	MYH15/MYH14/MYH3/MYH11/MYBPC1/MYH8/MYBPH/MYBPC2/MYOM1
GOBP_POSITIVE_REGULATION_OF_INTERLEUKIN_1_PRODUCTION	GOBP_POSITIVE_REGULATION_OF_INTERLEUKIN_1_PRODUCTION	GOBP_POSITIVE_REGULATION_OF_INTERLEUKIN_1_PRODUCTION	19	0.505877	2.04504	0.00209487	0.0323378	0.0271614	3369	tags=84%, list=40%, signal=50%	ISL1/IL16/P2RX7/SMAD3/F2RL1/CD36/PYHIN1/STAT3/NLRP1/IFI16/INAVA/HSPB1/S100A13/TMEM106A/TNF/AIM2
ICHIBA_GRAFT_VERSUS_HOST_DISEASE_D7_UP	ICHIBA_GRAFT_VERSUS_HOST_DISEASE_D7_UP	ICHIBA_GRAFT_VERSUS_HOST_DISEASE_D7_UP	34	0.40723	2.04478	0.00222904	0.033569	0.0281955	1686	tags=50%, list=20%, signal=40%	SNX10/FAS/PSMB8/NAMPT/PSMB9/LITAF/PROCR/COL4A1/HLA-DMB/AKAP9/XDH/PLD4/TAP1/IFI16/NFKBIZ/CD74/EIF1AY
GOBP_POSITIVE_REGULATION_OF_PHOSPHATIDYLINOSITOL_3_KINASE_SIGNALING	GOBP_POSITIVE_REGULATION_OF_PHOSPHATIDYLINOSITOL_3_KINASE_SIGNALING	GOBP_POSITIVE_REGULATION_OF_PHOSPHATIDYLINOSITOL_3_KINASE_SIGNALING	25	0.454651	2.0431	0.00198315	0.0313495	0.0263313	1486	tags=52%, list=18%, signal=43%	FGF2/BECN1/EGF/NTRK3/F2RL1/FN1/IGF1/NTRK2/ERBB4/PDGFC/RELN/ERBB3/TREM2
MCLACHLAN_DENTAL_CARIES_DN	MCLACHLAN_DENTAL_CARIES_DN	MCLACHLAN_DENTAL_CARIES_DN	35	0.402557	2.03817	0.00148585	0.0255784	0.021484	534	tags=29%, list=6%, signal=27%	KIF5C/ABLIM1/GAP43/CRABP1/ST8SIA1/TMEM255A/CALB1/SESN1/PGAP1/PLK2
GOMF_SERINE_TYPE_ENDOPEPTIDASE_INHIBITOR_ACTIVITY	GOMF_SERINE_TYPE_ENDOPEPTIDASE_INHIBITOR_ACTIVITY	GOMF_SERINE_TYPE_ENDOPEPTIDASE_INHIBITOR_ACTIVITY	25	0.452868	2.03509	0.00215654	0.0328888	0.0276242	1465	tags=48%, list=18%, signal=40%	SERPINE2/SERPINB6/SERPINI2/COL6A3/SPINK5/SERPINB9/TFPI/EPPIN/ANXA2/CPAMD8/A2M/A2ML1
SASSON_RESPONSE_TO_GONADOTROPHINS_DN	SASSON_RESPONSE_TO_GONADOTROPHINS_DN	SASSON_RESPONSE_TO_GONADOTROPHINS_DN	38	0.393237	2.03028	0.00172962	0.0285492	0.0239793	1577	tags=45%, list=19%, signal=36%	ABLIM1/PDLIM3/ACTA2/RGS5/BECN1/STK17A/PAWR/RGS4/CFLAR/ACTN1/TLK1/CASP4/RAB33B/CAP2/PMAIP1/PLCL1/TRIB1
GOMF_PHOSPHATIDYLSERINE_BINDING	GOMF_PHOSPHATIDYLSERINE_BINDING	GOMF_PHOSPHATIDYLSERINE_BINDING	24	0.453444	2.02869	0.00200283	0.0313495	0.0263313	1683	tags=50%, list=20%, signal=40%	GAP43/SYTL2/MFGE8/SYT13/OSBPL10/SYT5/SYT17/ANXA2/FCHO2/HAVCR1/TREM2/APPL1
TANAKA_METHYLATED_IN_ESOPHAGEAL_CARCINOMA	TANAKA_METHYLATED_IN_ESOPHAGEAL_CARCINOMA	TANAKA_METHYLATED_IN_ESOPHAGEAL_CARCINOMA	27	0.438975	2.02669	0.00230334	0.0342591	0.0287751	1399	tags=44%, list=17%, signal=37%	PCDH19/SALL1/TRIM68/CRABP1/BTN1A1/BARHL2/COL13A1/KIF20B/NETO2/PCGF5/IQCH/KCNMA1
GOBP_RESPONSE_TO_AMINE	GOBP_RESPONSE_TO_AMINE	GOBP_RESPONSE_TO_AMINE	13	0.573593	2.02635	0.00167321	0.0279161	0.0234475	801	tags=46%, list=10%, signal=42%	GLDC/RRM2B/DRD2/RGS7/RGS4/CPS1
GOBP_REGULATION_OF_POSITIVE_CHEMOTAXIS	GOBP_REGULATION_OF_POSITIVE_CHEMOTAXIS	GOBP_REGULATION_OF_POSITIVE_CHEMOTAXIS	11	0.60082	2.02517	0.00284847	0.0397977	0.0334272	2716	tags=91%, list=33%, signal=61%	PGF/S1PR1/IL16/SMAD3/NTRK3/F2RL1/CDH13/ITGA2/KDR/VEGFD
GOMF_AMINO_ACID_BINDING	GOMF_AMINO_ACID_BINDING	GOMF_AMINO_ACID_BINDING	25	0.450147	2.02286	0.00241769	0.0355207	0.0298348	2033	tags=56%, list=24%, signal=42%	GLDC/DDAH1/GLRA1/NOS1/SESN1/NOS2/CPS1/GRIN2B/GRIN3A/SESN3/DDC/SLC1A1/GLRA3/UBR1
BLANCO_MELO_COVID19_SARS_COV_2_POS_PATIENT_LUNG_TISSUE_UP	BLANCO_MELO_COVID19_SARS_COV_2_POS_PATIENT_LUNG_TISSUE_UP	BLANCO_MELO_COVID19_SARS_COV_2_POS_PATIENT_LUNG_TISSUE_UP	36	0.393453	2.02221	0.00161482	0.0271511	0.022805	1845	tags=47%, list=22%, signal=37%	F5/CYP4F3/IL2RG/RIPOR2/CACNA1A/SERPINB9/TRIM38/SELL/CHI3L2/SAMD9L/SP140/OAS3/EIF2AK2/CHI3L1/HSH2D/SLC26A8/GPX2
TAKEDA_TARGETS_OF_NUP98_HOXA9_FUSION_8D_UP	TAKEDA_TARGETS_OF_NUP98_HOXA9_FUSION_8D_UP	TAKEDA_TARGETS_OF_NUP98_HOXA9_FUSION_8D_UP	54	0.358034	2.02112	0.00117396	0.0215088	0.0180658	1773	tags=43%, list=21%, signal=34%	CMBL/ABCB1/IFIT5/NEGR1/RBM11/CALB1/ADRB1/SPTA1/HOPX/GDPD1/SLC6A13/OAS3/RXFP1/EIF2AK2/DDX60/FAT1/ENPP2/NMU/XAF1/PLD4/HOXB3/CNKSR3/PALLD
SANA_RESPONSE_TO_IFNG_UP	SANA_RESPONSE_TO_IFNG_UP	SANA_RESPONSE_TO_IFNG_UP	24	0.451679	2.02079	0.00204566	0.0318254	0.026731	2350	tags=67%, list=28%, signal=48%	LIPG/HLA-B/HLA-C/SAMD9L/NLRC5/DDX60/TRIM22/VAMP5/PARP9/CD74/DTX3L/ETV7/CD274/CX3CL1/HLA-DPA1/HSD17B11
GOBP_SODIUM_ION_TRANSPORT	GOBP_SODIUM_ION_TRANSPORT	GOBP_SODIUM_ION_TRANSPORT	101	0.304833	2.01872	0.000206775	0.00569709	0.00478514	2657	tags=55%, list=32%, signal=38%	SERPINE2/WNK4/DRD2/SCN3A/SLC9A9/STK39/NOS1/SLC22A5/NKAIN4/HECW1/P2RX7/FGF14/SLC24A2/SLC9A7/SLC4A7/SCN2A/SCN7A/HECW2/SLC6A15/UTRN/SLC4A5/NALCN/PTPN3/SLC6A12/SLC6A13/ATP1A4/SLC34A1/ATP1B4/SLC12A1/SLC6A1/NETO2/FXYD5/PKP2/SLC17A4/SLC6A2/SCN10A/CNKSR3/SLC10A5/SCN9A/SLC5A5/SLC6A4/CATSPER4/SLC13A1/ATP1A2/SLC6A5/SLC23A1/ATP1B1/NEDD4/SLC10A7/CATSPER3/SLC13A2/SLC5A12/TRPM2/FGF12/SCN1B/SLC4A4
HP_ABNORMAL_GERM_CELL_MORPHOLOGY	HP_ABNORMAL_GERM_CELL_MORPHOLOGY	HP_ABNORMAL_GERM_CELL_MORPHOLOGY	14	0.559897	2.01769	0.0015111	0.025797	0.0216676	2013	tags=64%, list=24%, signal=49%	DNAH8/DNAH10/SPEF2/DNAH2/DPY19L2/CFAP70/FSIP2/CFAP65/CFAP43
GOBP_SKELETAL_MUSCLE_CONTRACTION	GOBP_SKELETAL_MUSCLE_CONTRACTION	GOBP_SKELETAL_MUSCLE_CONTRACTION	17	0.524092	2.01769	0.00124467	0.0223875	0.0188039	1040	tags=47%, list=12%, signal=41%	SYNM/RPS6KB1/TNNT1/CHRND/STAC/MYH14/MYH3/TNNC2
RICKMAN_HEAD_AND_NECK_CANCER_A	RICKMAN_HEAD_AND_NECK_CANCER_A	RICKMAN_HEAD_AND_NECK_CANCER_A	39	0.385493	2.01643	0.00208851	0.0323062	0.0271349	1361	tags=44%, list=16%, signal=37%	SVIP/ZNF483/ADAM23/RASGEF1A/CRABP1/PCOLCE2/RNF150/SYT13/SYNPO2/COL22A1/IL17RD/PRAME/PARM1/FRZB/PRRX1/LIFR/STXBP6
HP_RECURRENT_SINOPULMONARY_INFECTIONS	HP_RECURRENT_SINOPULMONARY_INFECTIONS	HP_RECURRENT_SINOPULMONARY_INFECTIONS	24	0.449314	2.01021	0.00226029	0.0338013	0.0283907	1523	tags=50%, list=18%, signal=41%	DNAH5/SPEF2/PLCG2/CFTR/CFAP221/DNAH9/SPAG1/SRP54/STAT3/DNAAF4/DNAH11/DRC1
HP_ULNAR_DEVIATION_OF_THE_HAND_OR_OF_FINGERS_OF_THE_HAND	HP_ULNAR_DEVIATION_OF_THE_HAND_OR_OF_FINGERS_OF_THE_HAND	HP_ULNAR_DEVIATION_OF_THE_HAND_OR_OF_FINGERS_OF_THE_HAND	27	0.435248	2.00949	0.00269081	0.0382792	0.0321518	1271	tags=48%, list=15%, signal=41%	SALL1/COL9A1/ASXL3/BMPR1B/FBN2/PTRH2/NALCN/MUSK/MYH3/PIEZO2/ADGRG6/LIFR/MYBPC1
GOCC_SIDE_OF_MEMBRANE	GOCC_SIDE_OF_MEMBRANE	GOCC_SIDE_OF_MEMBRANE	216	0.258386	2.00931	9.92e-06	0.000479489	0.000402736	1533	tags=33%, list=18%, signal=28%	BTN2A2/ABCB1/ITGA1/GLRA1/ALCAM/SERPINE2/IL12RB2/MFGE8/CA4/BTN3A1/ITGAM/FAS/BTN3A2/GNAI1/IL2RG/THY1/SPN/S1PR1/RGS8/ANTXR1/HHLA2/HFE/BTN3A3/GNG2/P2RX7/SPTA1/BTN1A1/PKHD1/RAB21/B2M/HLA-B/HLA-C/CD302/CD36/TMC1/CYTH3/ITGA11/ITGAX/GFRA1/SCUBE1/STAC/PRLR/VTCN1/STAB2/PTPN3/CD200R1/SLC4A1/CACNB4/LITAF/GNA13/PGM5/CYLD/CD84/MICA/SNX9/KRAS/FRK/CDH13/LIFR/GNG3/FCRL6/DSG1/BTN2A3P/EPHA5/CD34/LCK/MICB/GNB4/ABCC4…
REACTOME_KERATINIZATION	REACTOME_KERATINIZATION	REACTOME_KERATINIZATION	21	0.476794	2.00825	0.0037317	0.0477622	0.0401168	2419	tags=62%, list=29%, signal=44%	TCHH/SPINK5/DSP/KRT10/PERP/DSG2/PPL/DSG1/PKP2/FLG/KAZN/KRT15/KRT7
GOBP_MULTICELLULAR_ORGANISMAL_MOVEMENT	GOBP_MULTICELLULAR_ORGANISMAL_MOVEMENT	GOBP_MULTICELLULAR_ORGANISMAL_MOVEMENT	18	0.508836	2.00374	0.00218104	0.0331225	0.0278205	1040	tags=44%, list=12%, signal=39%	SYNM/RPS6KB1/TNNT1/CHRND/STAC/MYH14/MYH3/TNNC2
BOSCO_EPITHELIAL_DIFFERENTIATION_MODULE	BOSCO_EPITHELIAL_DIFFERENTIATION_MODULE	BOSCO_EPITHELIAL_DIFFERENTIATION_MODULE	17	0.5202	2.0027	0.00138634	0.0242117	0.0203361	1665	tags=59%, list=20%, signal=47%	LMO7/MUC4/ADGRF1/MUC16/SPINK5/PTPN3/CEACAM6/PPL/A2ML1/TMPRSS4
KIM_LIVER_CANCER_POOR_SURVIVAL_DN	KIM_LIVER_CANCER_POOR_SURVIVAL_DN	KIM_LIVER_CANCER_POOR_SURVIVAL_DN	13	0.566873	2.00261	0.00200983	0.031358	0.0263385	1319	tags=54%, list=16%, signal=45%	ITPR2/F5/SLC22A7/SLC30A1/ADH1B/CYP4F12/CHI3L1
ZHAN_MULTIPLE_MYELOMA_DN	ZHAN_MULTIPLE_MYELOMA_DN	ZHAN_MULTIPLE_MYELOMA_DN	12	0.583875	2.0026	0.00412816	0.0510271	0.0428591	1470	tags=58%, list=18%, signal=48%	GLDC/LIPA/SMPDL3A/AIF1/MRC1/A2M/GP5
GOBP_POSITIVE_REGULATION_OF_CHEMOTAXIS	GOBP_POSITIVE_REGULATION_OF_CHEMOTAXIS	GOBP_POSITIVE_REGULATION_OF_CHEMOTAXIS	39	0.382707	2.00186	0.00221724	0.0334377	0.0280853	1861	tags=51%, list=22%, signal=40%	FGF2/PGF/STK39/S1PR1/IL16/RIPOR2/SMAD3/NTRK3/F2RL1/MET/AIF1/CDH13/NRP1/SEMA5A/CSF1R/CAMK1D/TREM2/CD74/MOSPD2/ITGA2
HP_CHRONIC_SINUSITIS	HP_CHRONIC_SINUSITIS	HP_CHRONIC_SINUSITIS	21	0.475044	2.00088	0.00394253	0.0494666	0.0415484	1523	tags=48%, list=18%, signal=39%	DNAH5/SPEF2/CFTR/CFAP221/DNAH9/SPAG1/DNAAF4/DNAH11/TAP1/DRC1
DE_YY1_TARGETS_DN	DE_YY1_TARGETS_DN	DE_YY1_TARGETS_DN	41	0.378015	1.99857	0.00148874	0.0255874	0.0214915	1531	tags=44%, list=18%, signal=36%	ERAP1/FAS/CD2AP/PKN2/EGF/FN1/PRKAA1/EGFR/RB1/RGS17/MET/GNA13/CYLD/NRP1/BTG4/CDC27/RAB6A/CSNK1G3
CROMER_TUMORIGENESIS_UP	CROMER_TUMORIGENESIS_UP	CROMER_TUMORIGENESIS_UP	20	0.482381	1.99626	0.00322158	0.0432258	0.0363066	1046	tags=45%, list=13%, signal=39%	NELL2/PDPN/SPP1/COL4A2/THY1/LAMA3/FN1/TNC/ACTN1
HP_GANGRENE	HP_GANGRENE	HP_GANGRENE	21	0.473603	1.99481	0.00398469	0.049765	0.041799	3760	tags=90%, list=45%, signal=50%	ERAP1/FAS/HLA-B/PROS1/ABCA12/STAT3/NIPAL4/FIP1L1/STAT4/HLA-DPA1/HLA-DPB1/MLX/PRKAR1A/ENPP1/TBL1XR1/TNFRSF1B/ABCC6/IRF2BP2/PTPN22
BERNARD_PPAPDC1B_TARGETS_DN	BERNARD_PPAPDC1B_TARGETS_DN	BERNARD_PPAPDC1B_TARGETS_DN	29	0.426665	1.99472	0.00240067	0.0353665	0.0297053	803	tags=28%, list=10%, signal=25%	KIF5C/GLDC/STC2/SCAMP1/SYT13/SUSD4/NSF/PRLR
REACTOME_INTERFERON_GAMMA_SIGNALING	REACTOME_INTERFERON_GAMMA_SIGNALING	REACTOME_INTERFERON_GAMMA_SIGNALING	32	0.407548	1.99363	0.00115662	0.0213823	0.0179596	2339	tags=59%, list=28%, signal=43%	TRIM68/TRIM21/B2M/HLA-B/TRIM5/HLA-C/TRIM38/TRIM29/OAS3/IRF6/TRIM31/PTPN2/TRIM22/PTAFR/SP100/TRIM14/HLA-DPA1/PIAS1/HLA-DPB1
TSENG_ADIPOGENIC_POTENTIAL_DN	TSENG_ADIPOGENIC_POTENTIAL_DN	TSENG_ADIPOGENIC_POTENTIAL_DN	27	0.431705	1.99313	0.00312133	0.0422877	0.0355186	1283	tags=41%, list=15%, signal=35%	CMBL/ADAM23/SIX1/TGFBI/COL4A2/SESN1/COL6A3/POPDC3/DKK3/NRP1/PPL
WP_COMPLEMENT_SYSTEM_IN_NEURONAL_DEVELOPMENT_AND_PLASTICITY	WP_COMPLEMENT_SYSTEM_IN_NEURONAL_DEVELOPMENT_AND_PLASTICITY	WP_COMPLEMENT_SYSTEM_IN_NEURONAL_DEVELOPMENT_AND_PLASTICITY	42	0.373125	1.99305	0.00153506	0.0261347	0.0219513	867	tags=33%, list=10%, signal=30%	MERTK/MFGE8/ITGAM/FAS/CASP7/C5/SUSD4/COLEC12/PLSCR1/MASP1/C3/ITGAX/PROS1/C7
WENDT_COHESIN_TARGETS_UP	WENDT_COHESIN_TARGETS_UP	WENDT_COHESIN_TARGETS_UP	20	0.481503	1.99263	0.00330365	0.0439459	0.0369114	2502	tags=65%, list=30%, signal=46%	ALCAM/MEF2A/TLK2/CAST/OXR1/FUT8/SEPTIN7/SREK1/FRA10AC1/PFDN4/VTA1/REEP3/YOD1
WP_MIRNA_TARGETS_IN_ECM_AND_MEMBRANE_RECEPTORS	WP_MIRNA_TARGETS_IN_ECM_AND_MEMBRANE_RECEPTORS	WP_MIRNA_TARGETS_IN_ECM_AND_MEMBRANE_RECEPTORS	14	0.552552	1.99122	0.0018762	0.0303987	0.0255327	2396	tags=79%, list=29%, signal=56%	ITGA1/COL4A2/COL6A3/FN1/ITGA11/COL4A1/LAMA4/MIR548D1/SDC2/COL1A2/LAMC1
GOBP_POSITIVE_REGULATION_OF_IMMUNE_RESPONSE	GOBP_POSITIVE_REGULATION_OF_IMMUNE_RESPONSE	GOBP_POSITIVE_REGULATION_OF_IMMUNE_RESPONSE	164	0.271007	1.99003	4.32e-05	0.00164826	0.00138442	1736	tags=35%, list=21%, signal=28%	BTN2A2/STAT6/PAK3/BTN3A1/ITGAM/BTN3A2/CNR1/THY1/HEXIM1/PAWR/C5/SUSD4/HHLA2/BTN3A3/P2RX7/BTN1A1/VAV3/USP29/B2M/F2RL1/HLA-B/TRIM5/PLSCR1/MASP1/C3/SKAP1/PLCG2/VTCN1/ADORA2B/INPP5D/FCRL3/C7/CD38/NLRC5/PYHIN1/HLA-DMB/TRIM56/CD160/PTPN2/LTA/BTN2A3P/C8A/LCK/MICB/A2M/TREM2/PARP9/CLNK/PTAFR/CLU/KLHL6/IFI16/NFKBIZ/CD74/APPL1/PGC/CD47
GOBP_CILIUM_MOVEMENT	GOBP_CILIUM_MOVEMENT	GOBP_CILIUM_MOVEMENT	60	0.340556	1.98938	0.000784713	0.0161231	0.0135422	2265	tags=52%, list=27%, signal=38%	DNAH5/APOB/ZBBX/SPEF2/CABYR/TPPP2/TMF1/SPAG6/ATP1A4/DNAH7/CFAP70/CFAP221/EPPIN/DNAH9/SLC22A14/FSIP2/DNAAF4/ADCY10/TACR3/CFAP54/MNS1/DNAH11/DRC1/CCSAP/SLC26A8/CFAP65/CFAP43/CATSPER4/TTLL6/CCDC65/UBE2B
HALLMARK_COMPLEMENT	HALLMARK_COMPLEMENT	HALLMARK_COMPLEMENT	75	0.317772	1.98861	0.000470039	0.0108289	0.00909548	2353	tags=48%, list=28%, signal=35%	LIPA/TIMP1/F5/ME1/DPP4/ITGAM/COL4A2/CASP7/GNG2/PLSCR1/CEBPB/CD36/FN1/C3/CSRP1/PSMB9/PLAT/CASP4/CDH13/KYNU/LCK/GNB4/DGKG/USP15/CLU/CPM/USP8/PDP1/PRSS3/DOCK10/ERAP2/USP14/CA2/ZFPM2/CASP10/KIF2A
GOBP_CELLULAR_DEFENSE_RESPONSE	GOBP_CELLULAR_DEFENSE_RESPONSE	GOBP_CELLULAR_DEFENSE_RESPONSE	10	0.618296	1.9874	0.00570694	0.0630559	0.0529624	1212	tags=60%, list=15%, signal=51%	BECN1/SPN/DCDC2/VEZF1/ADORA2B/NCR2
SEIDEN_ONCOGENESIS_BY_MET	SEIDEN_ONCOGENESIS_BY_MET	SEIDEN_ONCOGENESIS_BY_MET	38	0.384932	1.98739	0.00228202	0.0340002	0.0285577	4255	tags=89%, list=51%, signal=44%	SMN1/F2RL1/SPTLC1/TRAM1/SUB1/SH3BGRL/PLOD2/LYPLA1/STK26/TAF1D/DPM1/PPP1CB/PDE8A/PTEN/PAPOLA/CAPZA1/TMEM123/NSA2/RIOK3/SLC39A6/ANXA4/SEC23A/TCERG1/HNRNPH2/MBIP/SRP72/ADAM9/AIDA/IPO7/SERP1/TCEA1/RSL24D1/SERINC1/GLS
KEGG_CYTOKINE_CYTOKINE_RECEPTOR_INTERACTION	KEGG_CYTOKINE_CYTOKINE_RECEPTOR_INTERACTION	KEGG_CYTOKINE_CYTOKINE_RECEPTOR_INTERACTION	56	0.347623	1.98604	0.000926903	0.0179223	0.0150535	1718	tags=41%, list=21%, signal=33%	KITLG/NGFR/IL12RB2/FAS/EDA2R/BMPR1B/IL2RG/EGF/IL1RAP/PRLR/EGFR/IL22RA1/INHBE/PDGFC/MET/TNFSF15/TNFRSF1A/LIFR/LTA/IL19/CSF1R/CXCL3/TPO
GOBP_DEVELOPMENTAL_INDUCTION	GOBP_DEVELOPMENTAL_INDUCTION	GOBP_DEVELOPMENTAL_INDUCTION	12	0.578943	1.98568	0.00499309	0.0572118	0.0480538	1084	tags=50%, list=13%, signal=44%	FGF2/SALL1/SIX1/WNT4/BMP4/FGF1
HALLMARK_INTERFERON_GAMMA_RESPONSE	HALLMARK_INTERFERON_GAMMA_RESPONSE	HALLMARK_INTERFERON_GAMMA_RESPONSE	58	0.343858	1.98501	0.000976654	0.0186512	0.0156656	1517	tags=41%, list=18%, signal=34%	PARP12/TRIM21/FAS/TXNIP/CASP7/DHX58/PSMB8/B2M/HLA-B/PLSCR1/NAMPT/PSMB9/SAMD9L/CD38/OAS3/NLRC5/EIF2AK2/DDX60/CASP4/PTPN2/STAT3/XAF1/TAP1/VAMP5
SENESE_HDAC1_TARGETS_UP	SENESE_HDAC1_TARGETS_UP	SENESE_HDAC1_TARGETS_UP	201	0.258153	1.98435	2.05e-05	0.000892082	0.000749284	2377	tags=44%, list=28%, signal=32%	HDAC9/DDAH1/KITLG/FAM126A/B4GALT6/FAS/ZMAT3/LSM12/EIF5A2/SCG5/PRSS35/KDM1B/MYO6/AP1S3/PTBP3/COL22A1/RGS4/NRIP3/CARNMT1/FN1/NAMPT/C3/CYTH3/TMEM154/SLC6A15/PLIN2/TRIM38/CLDN12/RB1/MET/DSG2/GNA13/SLAIN2/KBTBD8/DNAJB14/RPAP3/TFPI/KYNU/SPAG1/MAST4/NAV3/TMED2/CDC27/PCGF5/USP32/FCHO2/ELK3/RAB6A/RAB8B/CSGALNACT2/STRN/ABCC4/BCLAF1/LYPLA1/IQGAP1/TRIB1/LINC00520/STK26/IFI16/NFKBIZ/LRRC58/PTPN12/CXCL3/NFE2L2…
HP_EPIDERMAL_ACANTHOSIS	HP_EPIDERMAL_ACANTHOSIS	HP_EPIDERMAL_ACANTHOSIS	15	0.539627	1.98415	0.00261182	0.037359	0.0313788	1504	tags=67%, list=18%, signal=55%	EXPH5/DSP/EGFR/KRT10/PERP/GRHL2/CAST/DSG1/NIPAL4/NLRP1
BUCKANOVICH_T_LYMPHOCYTE_HOMING_ON_TUMOR_UP	BUCKANOVICH_T_LYMPHOCYTE_HOMING_ON_TUMOR_UP	BUCKANOVICH_T_LYMPHOCYTE_HOMING_ON_TUMOR_UP	11	0.58837	1.98321	0.00414577	0.0510698	0.0428949	1934	tags=73%, list=23%, signal=56%	SERPINB6/CYP1B1/SKAP2/C3/CFLAR/DPY19L2/ESR1/CCDC102B
SPIRA_SMOKERS_LUNG_CANCER_UP	SPIRA_SMOKERS_LUNG_CANCER_UP	SPIRA_SMOKERS_LUNG_CANCER_UP	14	0.549082	1.97872	0.00209951	0.0323378	0.0271614	2657	tags=71%, list=32%, signal=49%	NELL2/TOB1/FGF14/TRAM1/TMED2/TWF1/ACTR2/FXR1/PLA2G4A/SLC4A4
GOBP_RESPONSE_TO_MECHANICAL_STIMULUS	GOBP_RESPONSE_TO_MECHANICAL_STIMULUS	GOBP_RESPONSE_TO_MECHANICAL_STIMULUS	60	0.33859	1.9779	0.000818585	0.0166265	0.013965	1319	tags=37%, list=16%, signal=31%	USP53/SERPINE2/TMEM150C/RPS6KB1/DRD2/FAS/TXNIP/TRPA1/PHF24/PKD1L2/P2RX7/TMC1/MPO/MMP2/TMC2/TNFRSF1A/PDE2A/COL1A1/PIEZO2/PKD1L3/PPL/CHI3L1
BEGUM_TARGETS_OF_PAX3_FOXO1_FUSION_UP	BEGUM_TARGETS_OF_PAX3_FOXO1_FUSION_UP	BEGUM_TARGETS_OF_PAX3_FOXO1_FUSION_UP	31	0.407386	1.97705	0.00205018	0.0318499	0.0267516	2736	tags=71%, list=33%, signal=48%	KITLG/PITX2/SCAMP1/SLIT3/CNR1/MAN1A1/VAV3/LTBP1/PERP/LIFR/EPHA4/ID4/PLSCR4/SH3GLB1/DACH1/GOLIM4/PCDH17/MDFIC/STK17B/LRRN3/PLXNC1/TWSG1
GARGALOVIC_RESPONSE_TO_OXIDIZED_PHOSPHOLIPIDS_GREEN_UP	GARGALOVIC_RESPONSE_TO_OXIDIZED_PHOSPHOLIPIDS_GREEN_UP	GARGALOVIC_RESPONSE_TO_OXIDIZED_PHOSPHOLIPIDS_GREEN_UP	12	0.57616	1.97613	0.0053076	0.0601788	0.0505458	625	tags=42%, list=7%, signal=39%	HDAC9/CPNE8/SERPINE2/AKR1B10/SLC4A7
KOYAMA_SEMA3B_TARGETS_UP	KOYAMA_SEMA3B_TARGETS_UP	KOYAMA_SEMA3B_TARGETS_UP	131	0.280333	1.97541	9.94e-05	0.00326072	0.00273877	1320	tags=28%, list=16%, signal=24%	LRCH2/KIF5C/DYNC2H1/DDAH1/MAGI2-AS3/STC2/FCGBP/CAMK2N1/FZD2/TGFBI/GRB14/TUBE1/PAX6/LINC01226/CCDC186/ANTXR1/SUSD4/SLC35F1/ITGBL1/SH3TC2/PSMB8/HMGN5/ARFGEF3/CD302/TCEAL9/CNTNAP3/SP140/CCDC80/PNPO/FGF1/CNFN/ZNF618/RILPL2/SH3BGRL/PPL/PCGF5/PKP2
TONKS_TARGETS_OF_RUNX1_RUNX1T1_FUSION_HSC_UP	TONKS_TARGETS_OF_RUNX1_RUNX1T1_FUSION_HSC_UP	TONKS_TARGETS_OF_RUNX1_RUNX1T1_FUSION_HSC_UP	82	0.310335	1.97387	0.000567383	0.0124114	0.0104246	2115	tags=41%, list=25%, signal=31%	HLF/TXNIP/ACTA2/DGKE/H1-0/DRAM1/S1PR1/CDC42EP3/TOM1L1/RIPOR2/NTRK3/F2RL1/TRIM5/SERPINB9/RB1/PROCR/PLAT/ZNF217/SENP7/TFPI/RNF17/ANXA2/PDLIM5/RUNX1/NEDD9/NLRP1/UBL3/IFI16/PALLD/TWF1/THSD7A/BBIP1/CA2/FXR1
GOBP_PHOSPHOLIPASE_C_ACTIVATING_G_PROTEIN_COUPLED_RECEPTOR_SIGNALING_PATHWAY	GOBP_PHOSPHOLIPASE_C_ACTIVATING_G_PROTEIN_COUPLED_RECEPTOR_SIGNALING_PATHWAY	GOBP_PHOSPHOLIPASE_C_ACTIVATING_G_PROTEIN_COUPLED_RECEPTOR_SIGNALING_PATHWAY	20	0.476586	1.97228	0.003673	0.0471224	0.0395794	1401	tags=55%, list=17%, signal=46%	CCKBR/PLCB2/DRD2/PTGER3/S1PR1/F2RL1/GRM5/LHCGR/OPRK1/NPR3/OPRM1
DOANE_BREAST_CANCER_ESR1_UP	DOANE_BREAST_CANCER_ESR1_UP	DOANE_BREAST_CANCER_ESR1_UP	46	0.361566	1.97113	0.00293727	0.0406192	0.0341172	1222	tags=39%, list=15%, signal=34%	PNPLA4/ALCAM/STC2/GREB1/TNNT1/BMPR1B/ABAT/MLPH/MYO6/CYBRD1/VAV3/GFRA1/ERBB4/GALNT7/MAPT/SYT17/CCDC170/MAST4
SMID_BREAST_CANCER_RELAPSE_IN_BONE_UP	SMID_BREAST_CANCER_RELAPSE_IN_BONE_UP	SMID_BREAST_CANCER_RELAPSE_IN_BONE_UP	44	0.364948	1.97102	0.00314138	0.0424655	0.0356679	1012	tags=34%, list=12%, signal=30%	KIF5C/NELL2/REPS2/MGAM/ABAT/LIN7A/MLPH/LRP1B/TOM1L1/PLK2/BCAS1/GFRA1/CEACAM6/GALNT7/ADH1B
GOBP_DIGESTIVE_SYSTEM_PROCESS	GOBP_DIGESTIVE_SYSTEM_PROCESS	GOBP_DIGESTIVE_SYSTEM_PROCESS	37	0.382034	1.9703	0.00411568	0.0509783	0.042818	1471	tags=38%, list=18%, signal=31%	SNX10/CCKBR/WNK4/PTGER3/STK39/SLC22A5/MUC4/CD36/MUC6/SLC26A7/OPRK1/NPR3/MOGAT2/CHRM5
BOQUEST_STEM_CELL_CULTURED_VS_FRESH_DN	BOQUEST_STEM_CELL_CULTURED_VS_FRESH_DN	BOQUEST_STEM_CELL_CULTURED_VS_FRESH_DN	11	0.584502	1.97017	0.00461955	0.0542574	0.0455723	1283	tags=64%, list=15%, signal=54%	C3/IGF1/NTRK2/C7/ADH1B/CHL1/PPL
CORRE_MULTIPLE_MYELOMA_UP	CORRE_MULTIPLE_MYELOMA_UP	CORRE_MULTIPLE_MYELOMA_UP	27	0.426529	1.96923	0.0034227	0.0449769	0.0377774	2203	tags=52%, list=26%, signal=38%	KCTD16/ADAM23/USP53/DPP4/LMO2/RGS4/COL13A1/PLAT/TFPI/NLRP1/ITGA2/OTULINL/ABCA6/GCKR
GOMF_COLLAGEN_BINDING	GOMF_COLLAGEN_BINDING	GOMF_COLLAGEN_BINDING	26	0.433519	1.96794	0.00334037	0.0443254	0.0372301	1189	tags=38%, list=14%, signal=33%	ITGA1/PCOLCE2/TGFBI/ANTXR1/SMAD3/FN1/ITGA11/MUSK/NID2/ADGRG6
SEAVEY_EPITHELIOID_HEMANGIOENDOTHELIOMA	SEAVEY_EPITHELIOID_HEMANGIOENDOTHELIOMA	SEAVEY_EPITHELIOID_HEMANGIOENDOTHELIOMA	29	0.420331	1.9651	0.00300622	0.041369	0.034747	2090	tags=55%, list=25%, signal=42%	FGF2/HOXA1/EFEMP1/BMP4/LTBP1/TNFSF15/PLAT/CDH13/PLCD3/TRIM58/MICB/SSC4D/OSGIN2/SLC6A4/ERAP2/MYLK3
LINDGREN_BLADDER_CANCER_CLUSTER_2B	LINDGREN_BLADDER_CANCER_CLUSTER_2B	LINDGREN_BLADDER_CANCER_CLUSTER_2B	167	0.267223	1.96384	3.3e-05	0.00132769	0.00111517	1455	tags=32%, list=17%, signal=27%	TMTC1/PDPN/PAPPA/HLF/CNRIP1/RGL1/FAM126A/DOCK2/PITX2/ACTA2/DDX3Y/COL15A1/RGS5/IL2RG/C1orf54/TSC22D3/IL16/CDC42EP3/COL6A3/CYBRD1/ABI3BP/EPB41L2/FAM200B/ARHGAP30/COLEC12/EFEMP1/CD302/DAAM2/ADAMTS9/RUNX2/PROS1/CSRP1/MMP2/SELL/TNC/AIF1/SVEP1/CCDC80/DKK3/TENT5C/TNS1/DNAJC3/NID2/PRRX1/EDIL3/PDE1A/PECAM1/PRICKLE1/CYTH4/STXBP6/LCK/A2M/LAMA4/PCP4
GOBP_RESPONSE_TO_WOUNDING	GOBP_RESPONSE_TO_WOUNDING	GOBP_RESPONSE_TO_WOUNDING	216	0.252447	1.96313	2.1e-05	0.000898393	0.000754585	1524	tags=31%, list=18%, signal=26%	PDPN/FGF2/GAP43/NDNF/TIMP1/F5/MERTK/SERPINE2/FLRT3/ALOX5/ENPP4/RPS6KB1/DRD2/SPP1/ACTA2/DGKE/ISL1/MRLN/ABAT/CHMP2B/PAX6/OCLN/WNT4/PAPSS2/SMAD3/NTRK3/VAV3/F2RL1/SYTL4/HPSE/PLSCR1/CD36/FN1/IGF1/ADTRP/CFLAR/SCUBE1/PROS1/PLCG2/DSP/CSRP1/MMP2/SLC4A1/LYVE1/TNC/RGMA/PROCR/GNA13/AIF1/ACTN1/COL1A1/PLAT/FGF1/TFPI/FKBP10/PPL/ERBB3/PIK3CB/ELK3/CD34/OPRM1/LCK/EPHA4/GP5/TREM2/FGFR1OP2/DGKG
YAO_TEMPORAL_RESPONSE_TO_PROGESTERONE_CLUSTER_2	YAO_TEMPORAL_RESPONSE_TO_PROGESTERONE_CLUSTER_2	YAO_TEMPORAL_RESPONSE_TO_PROGESTERONE_CLUSTER_2	22	0.453909	1.96308	0.00316309	0.042671	0.0358406	3822	tags=91%, list=46%, signal=49%	GCNT2/PLA2R1/SLC4A1/TTC14/AKAP9/NMU/ESR1/MEG3/FUBP1/RPP30/CAPN3/HNRNPU/CLK1/RAB14/CLK4/KIAA1217/TARDBP/PAXBP1/PKLR/ZMYM6
FUJII_YBX1_TARGETS_UP	FUJII_YBX1_TARGETS_UP	FUJII_YBX1_TARGETS_UP	13	0.555409	1.96211	0.00288538	0.0402096	0.0337732	1559	tags=62%, list=19%, signal=50%	FAS/ACTA2/PDK4/NLRC5/EDIL3/PRICKLE1/TRIM22/CPNE4
CHANG_IMMORTALIZED_BY_HPV31_UP	CHANG_IMMORTALIZED_BY_HPV31_UP	CHANG_IMMORTALIZED_BY_HPV31_UP	26	0.432215	1.96201	0.00351503	0.0456363	0.0383312	1510	tags=50%, list=18%, signal=41%	PART1/SLC9A9/PRKAA2/MANEA/ARHGAP36/DLEU2/CLDN12/LTBP1/GABPA/ARID4A/EDIL3/MAP9/BHLHE41
MOHANKUMAR_HOXA1_TARGETS_DN	MOHANKUMAR_HOXA1_TARGETS_DN	MOHANKUMAR_HOXA1_TARGETS_DN	67	0.323919	1.96044	0.000814553	0.0165789	0.0139251	997	tags=30%, list=12%, signal=26%	KIF5C/NELL2/ALCAM/TNIK/RNF150/DRD2/TXNIP/TUBE1/C3orf52/LRP1B/CGNL1/STEAP2/FAXDC2/SPINK5/ERBB4/PROS1/PREX2/CEACAM6/TNC/DKK3
ONDER_CDH1_TARGETS_2_DN	ONDER_CDH1_TARGETS_2_DN	ONDER_CDH1_TARGETS_2_DN	165	0.268495	1.96025	4.15e-05	0.00159793	0.00134215	1752	tags=36%, list=21%, signal=29%	SNCA/HDAC9/PDPN/ABLIM1/SNX10/QPCT/FAM169A/HOXA1/FLRT3/PARP12/CAMK2N1/ST6GALNAC5/EXPH5/ARHGEF3/GRB14/FAT2/LAMA3/PLK2/HPSE/POPDC3/IL1RAP/HOOK1/C3/ADTRP/SLC6A15/STAC/DSP/TRIM29/PTPN3/CEACAM6/ABCA12/ESRP1/PERP/DSG2/SH2D3A/OAS3/IRF6/DDX60/GRHL2/KLF5/SPAG1/MAST4/NAV3/PPL/ERBB3/MGST2/NMU/COL17A1/XDH/TREM2/BHLHE41/PTAFR/FRMD4B/MFAP5/ADGRE2/GNAL/TMPRSS4/CXCL3/CREG1/CELSR1
WP_ALLOGRAFT_REJECTION	WP_ALLOGRAFT_REJECTION	WP_ALLOGRAFT_REJECTION	23	0.444779	1.95983	0.00505028	0.0577449	0.0485016	1043	tags=48%, list=12%, signal=42%	ABCB1/FAS/CASP7/C5/HLA-B/HLA-C/C3/C7/GABPA/MICA/HLA-DMB
GOBP_NEGATIVE_REGULATION_OF_ION_TRANSPORT	GOBP_NEGATIVE_REGULATION_OF_ION_TRANSPORT	GOBP_NEGATIVE_REGULATION_OF_ION_TRANSPORT	54	0.345996	1.95317	0.00188951	0.0304912	0.0256104	1351	tags=35%, list=16%, signal=30%	SNCA/SERPINE2/WNK4/DRD2/MRLN/CNR1/STK39/NOS1/ABAT/HECW1/PLA2R1/RGS4/PRKG2/HECW2/BEST3/SLC30A1/EPPIN/TRDN/TRH
FLECHNER_BIOPSY_KIDNEY_TRANSPLANT_OK_VS_DONOR_UP	FLECHNER_BIOPSY_KIDNEY_TRANSPLANT_OK_VS_DONOR_UP	FLECHNER_BIOPSY_KIDNEY_TRANSPLANT_OK_VS_DONOR_UP	248	0.245092	1.95289	6.36e-06	0.000336031	0.000282242	3283	tags=57%, list=39%, signal=36%	SERPINE2/TOB1/GCC2/NDUFA5/SCAMP1/RFK/ACTA2/DYNLT3/RGS5/LUC7L3/ABAT/CYP1B1/ACBD3/SPTSSA/CD2AP/PKN2/SMURF2/RAP1B/F2RL1/PLSCR1/TMED5/CFLAR/MED13/PSMB9/RB1/C7/LITAF/SLC34A1/PNISR/QKI/EIF2AK2/ARF4/COL4A1/ACTN1/SNX2/CASP4/FAT1/TFPI/ENPP2/SHOC2/UFL1/MYH11/SUB1/STAT3/SH3BGRL/PDLIM5/ERBB3/PLOD2/CDH11/SCFD1/DDX5/UGT8/TRA2A/FRMD4B/CLU/NEK7/IFI16/BEX4/CD74/PPM1B/DPM1/COPS2/PTPN12/PJA2/PALLD/HMGN1/TERF1/TWF1/…
BOSCO_TH1_CYTOTOXIC_MODULE	BOSCO_TH1_CYTOTOXIC_MODULE	BOSCO_TH1_CYTOTOXIC_MODULE	29	0.417289	1.95088	0.00335226	0.0444287	0.0373169	2055	tags=55%, list=25%, signal=42%	ABCB1/MERTK/RGL1/IL12RB2/CRABP1/ANXA2R/CD300E/TMEM229B/CD38/ENPP2/HAPLN3/STAB1/F13A1/MYBL1/P2RX5/STAT4
GOCC_STEREOCILIUM_BUNDLE	GOCC_STEREOCILIUM_BUNDLE	GOCC_STEREOCILIUM_BUNDLE	27	0.421437	1.94573	0.00385322	0.0487984	0.0409872	1038	tags=44%, list=12%, signal=39%	HOMER2/PCDH15/CALB1/PKHD1L1/TRPA1/RIPOR2/DCDC2/SLC4A7/TMC1/MYO3A/TMC2/CLIC5
RICKMAN_HEAD_AND_NECK_CANCER_C	RICKMAN_HEAD_AND_NECK_CANCER_C	RICKMAN_HEAD_AND_NECK_CANCER_C	32	0.397399	1.94398	0.00175084	0.0287243	0.0241264	1459	tags=47%, list=17%, signal=39%	IL12RB2/FLRT3/HSD17B2/TCHH/CALB1/NOS1/POPDC3/COL4A6/SLC6A15/ABCA12/TNC/CT69/DSG1/IL19/S100A7A
HP_CORNEAL_EROSION	HP_CORNEAL_EROSION	HP_CORNEAL_EROSION	15	0.528489	1.9432	0.0036812	0.0471717	0.0396208	1404	tags=53%, list=17%, signal=44%	PRDM5/TGFBI/PAX6/HLA-B/PLCG2/ABCA12/COL17A1/NIPAL4
GARGALOVIC_RESPONSE_TO_OXIDIZED_PHOSPHOLIPIDS_BLUE_UP	GARGALOVIC_RESPONSE_TO_OXIDIZED_PHOSPHOLIPIDS_BLUE_UP	GARGALOVIC_RESPONSE_TO_OXIDIZED_PHOSPHOLIPIDS_BLUE_UP	69	0.316301	1.94114	0.000868588	0.017257	0.0144946	3057	tags=57%, list=37%, signal=36%	KITLG/CHORDC1/MOSMO/HSPA4L/STK17A/TSC22D3/HSPH1/GNA13/LURAP1L/KBTBD8/KLF5/RELN/FGFR1OP2/PMAIP1/TRIB1/CBLL1/CXCL3/KANSL1L/N4BP2L2/ZBTB21/ATF3/AIFM2/KLHL28/SOS1/RYBP/MTHFD2L/RELB/ZC3H12C/MIR4458HG/CPEB4/PCF11/DNAJB9/DNAJA1/NUTM2B-AS1/SAV1/VPS37A/PNPLA8/CWC25/TMEM217
OSMAN_BLADDER_CANCER_UP	OSMAN_BLADDER_CANCER_UP	OSMAN_BLADDER_CANCER_UP	193	0.253372	1.94111	6.59e-05	0.0023061	0.00193696	2988	tags=56%, list=36%, signal=37%	KCTD12/ERAP1/ENPP4/SCAMP1/B4GALT6/ZMAT3/TMEM106B/CYP1B1/LIN7C/DYNLL2/DLEU2/TSNAX/PLSCR1/PCMTD1/NAMPT/TMED7/TMED5/DCUN1D1/C1orf162/TIPRL/PNISR/DNAJB14/OTUD6B/MALAT1/RO60/RNPC3/PHC3/KYNU/TTC33/PHAX/SUGT1/ESF1/BLM/OXR1/PDLIM5/STRN/BCLAF1/FGFR1OP2/LYPLA1/IQGAP1/FRMD4B/ATF7IP/KLHL6/NFKBIZ/BRWD3/FNIP1/APPL1/CD47/SPIN4/CRIPT/SRP19/AGPS/TWF1/SEC24A/BLOC1S6/SOS1/LNPK/FBXO22/G2E3/GOLIM4/KPNB1/UBE2W/FXR1/PT…
GOBP_POSITIVE_REGULATION_OF_INTERLEUKIN_1_BETA_PRODUCTION	GOBP_POSITIVE_REGULATION_OF_INTERLEUKIN_1_BETA_PRODUCTION	GOBP_POSITIVE_REGULATION_OF_INTERLEUKIN_1_BETA_PRODUCTION	17	0.504048	1.94052	0.00237961	0.0351134	0.0294927	1614	tags=53%, list=19%, signal=43%	ISL1/P2RX7/SMAD3/F2RL1/CD36/PYHIN1/STAT3/NLRP1/IFI16
GOBP_INOSITOL_PHOSPHATE_BIOSYNTHETIC_PROCESS	GOBP_INOSITOL_PHOSPHATE_BIOSYNTHETIC_PROCESS	GOBP_INOSITOL_PHOSPHATE_BIOSYNTHETIC_PROCESS	14	0.537633	1.93746	0.00348556	0.0454785	0.0381986	1563	tags=57%, list=19%, signal=47%	SNCA/FGF2/IPMK/PLCG2/ADCYAP1R1/IP6K3/LHCGR/PTAFR
GOBP_REGULATION_OF_BEHAVIOR	GOBP_REGULATION_OF_BEHAVIOR	GOBP_REGULATION_OF_BEHAVIOR	22	0.447974	1.93741	0.00388486	0.0489701	0.0411313	1454	tags=50%, list=17%, signal=41%	HOXA1/DRD2/CNR1/ADRB1/MC4R/RELN/STAT3/NMU/OPRK1/TACR3/KCNA2
GOBP_PLATELET_ACTIVATION	GOBP_PLATELET_ACTIVATION	GOBP_PLATELET_ACTIVATION	43	0.361457	1.93691	0.00351084	0.0456363	0.0383312	1666	tags=40%, list=20%, signal=32%	PDPN/MERTK/SERPINE2/DGKE/ABAT/VAV3/PLSCR1/FN1/PLCG2/CSRP1/GNA13/ACTN1/PIK3CB/LCK/GP5/DGKG/PEAR1
CROMER_TUMORIGENESIS_DN	CROMER_TUMORIGENESIS_DN	CROMER_TUMORIGENESIS_DN	13	0.548242	1.93679	0.00395992	0.0496273	0.0416834	2319	tags=77%, list=28%, signal=56%	MUC4/HOPX/NUCB2/SPINK5/CEACAM6/MYH11/PPL/CLU/KRT15/SMAGP
BUYTAERT_PHOTODYNAMIC_THERAPY_STRESS_UP	BUYTAERT_PHOTODYNAMIC_THERAPY_STRESS_UP	BUYTAERT_PHOTODYNAMIC_THERAPY_STRESS_UP	353	0.229588	1.93341	2.33e-06	0.00013354	0.000112164	2858	tags=48%, list=34%, signal=33%	BTN2A2/FGF2/KITLG/FAM169A/STC2/TOB1/RGL1/MEF2A/CHORDC1/BTN3A1/SORBS1/HSPA4L/DNAJB4/TXNIP/GNAI1/LARP6/PGF/ATXN3/ARHGEF3/SHTN1/ZC2HC1A/ACBD3/EIF5A2/SCG5/C3orf52/SPAG9/PRRC1/BTN3A3/PTBP3/ITSN2/GOLGA5/F2RL1/HSPH1/SLC4A7/UBE2D1/CEBPB/NAMPT/TCEAL9/RRAS2/TMED5/SKIL/PLIN2/RCAN3/TMF1/RGS17/GNA13/PNISR/GABPA/SLC30A1/UPF3B/SMC5/CDKL3/DNAJB14/CIR1/KLF5/RAB22A/KLF10/TFPI/GOLGA2/RELN/TTC33/GJC1/PPL/AKAP9/UFM1/…
HP_PRODUCTIVE_COUGH	HP_PRODUCTIVE_COUGH	HP_PRODUCTIVE_COUGH	24	0.431646	1.93116	0.0054082	0.0608836	0.0511378	1621	tags=46%, list=19%, signal=37%	DNAH5/SPEF2/CFTR/CFAP221/DNAH9/SPAG1/STAT3/DNAAF4/DNAH11/DRC1/FIP1L1
GOBP_POSITIVE_REGULATION_OF_OSTEOBLAST_DIFFERENTIATION	GOBP_POSITIVE_REGULATION_OF_OSTEOBLAST_DIFFERENTIATION	GOBP_POSITIVE_REGULATION_OF_OSTEOBLAST_DIFFERENTIATION	34	0.384598	1.93114	0.00426698	0.0522066	0.0438498	767	tags=32%, list=9%, signal=30%	FGF2/TENT5A/BMPR1B/SCUBE3/WNT4/SUCO/FBN2/BMP4/CEBPB/IGF1/RUNX2
GOBP_AXONEMAL_DYNEIN_COMPLEX_ASSEMBLY	GOBP_AXONEMAL_DYNEIN_COMPLEX_ASSEMBLY	GOBP_AXONEMAL_DYNEIN_COMPLEX_ASSEMBLY	12	0.563024	1.93108	0.00664431	0.0696658	0.0585142	1523	tags=58%, list=18%, signal=48%	DNAH5/DNAH8/DNAH2/DNAH7/SPAG1/DNAAF4/DRC1
GOMF_MONOOXYGENASE_ACTIVITY	GOMF_MONOOXYGENASE_ACTIVITY	GOMF_MONOOXYGENASE_ACTIVITY	28	0.416287	1.92997	0.00378252	0.0482416	0.0405195	2271	tags=61%, list=27%, signal=44%	CYP2S1/CYP4F3/TPH1/NOS1/CYP1B1/NOS2/FAXDC2/KMO/FMO2/CYP27C1/CMAHP/CYP4F12/CYP7B1/CYP4F2/CYP4F8/CYP19A1/CYP3A5
HP_CENTRAL_OPACIFICATION_OF_THE_CORNEA	HP_CENTRAL_OPACIFICATION_OF_THE_CORNEA	HP_CENTRAL_OPACIFICATION_OF_THE_CORNEA	11	0.572454	1.92956	0.00635679	0.0675085	0.0567023	2055	tags=64%, list=25%, signal=48%	PITX2/TGFBI/CYP1B1/PAX6/PTPN2/ANKRD55/STAT4
GOMF_OXIDOREDUCTASE_ACTIVITY_ACTING_ON_PAIRED_DONORS_WITH_INCORPORATION_OR_REDUCTION_OF_MOLECULAR_OXYGEN_REDUCED_FLAVIN_OR_FLAVOPROTEIN_AS_ONE_DONOR_AND_INCORPORATION_OF_ONE_ATOM_OF_OXYGEN	GOMF_OXIDOREDUCTASE_ACTIVITY_ACTING_ON_PAIRED_DONORS_WITH_INCORPORATION_OR_REDUCTION_OF_MOLECULAR_OXYGEN_REDUCED_FLAVIN_OR_FLAVOPROTEIN_AS_ONE_DONOR_AND_INCORPORATION_OF_ONE_ATOM_OF_OXYGEN	GOMF_OXIDOREDUCTASE_ACTIVITY_ACTING_ON_PAIRED_DONORS_WITH_INCORPORATION_OR_REDUCTION_OF_MOLECULAR_OXYGEN_REDUCED_FLAVIN_OR_FLAVOPROTEIN_AS_ONE_DONOR_AND_INCORPORATION_OF_ONE_ATOM_OF_OXYGEN	13	0.54581	1.92819	0.0041195	0.0509783	0.042818	2648	tags=77%, list=32%, signal=53%	CYP2S1/CYP4F3/CYP1B1/CYP4F12/CYP7B1/CYP4F2/CYP4F8/CYP19A1/CYP3A5/CYP2J2
GOBP_POSITIVE_REGULATION_OF_ANIMAL_ORGAN_MORPHOGENESIS	GOBP_POSITIVE_REGULATION_OF_ANIMAL_ORGAN_MORPHOGENESIS	GOBP_POSITIVE_REGULATION_OF_ANIMAL_ORGAN_MORPHOGENESIS	13	0.545709	1.92784	0.0041195	0.0509783	0.042818	1395	tags=54%, list=17%, signal=45%	FGF2/NGFR/SIX1/WNT4/BMP4/FGF1/CD34
DAUER_STAT3_TARGETS_DN	DAUER_STAT3_TARGETS_DN	DAUER_STAT3_TARGETS_DN	18	0.48907	1.92591	0.00364862	0.0468651	0.0393633	1061	tags=44%, list=13%, signal=39%	PARP12/DNAJB4/PDK4/GRB14/HEXIM1/TRIM5/OAS3/DDX60
GOBP_ACTIVATION_OF_ADENYLATE_CYCLASE_ACTIVITY	GOBP_ACTIVATION_OF_ADENYLATE_CYCLASE_ACTIVITY	GOBP_ACTIVATION_OF_ADENYLATE_CYCLASE_ACTIVITY	10	0.598812	1.92478	0.0095452	0.0883399	0.0741992	1946	tags=70%, list=23%, signal=54%	ADRB1/GLP1R/ADORA2B/RXFP1/CAP2/LHCGR/LGR4
GOCC_CILIARY_PLASM	GOCC_CILIARY_PLASM	GOCC_CILIARY_PLASM	56	0.336681	1.92353	0.00170489	0.0282704	0.0237451	2048	tags=45%, list=25%, signal=34%	DYNC2H1/DNAH5/DNAH8/DNAH14/DNAH10/DNAH6/DNAH2/DCDC2/SPAG6/DNAH7/CFAP70/CFAP221/DNAH9/CFAP54/MNS1/CCDC113/DNAH11/DRC1/CCSAP/BBS7/ARL6/SEPTIN7/LCA5/CFAP43/RPGRIP1L
GOBP_RESPONSE_TO_COLD	GOBP_RESPONSE_TO_COLD	GOBP_RESPONSE_TO_COLD	19	0.475064	1.92047	0.00633604	0.0675085	0.0567023	1568	tags=53%, list=19%, signal=43%	SLC25A27/CDH8/TRPA1/ADRB1/RGS7/PLIN1/PRKAA1/DNAJC3/EIF2AK3/MT-CO2
KEGG_ECM_RECEPTOR_INTERACTION	KEGG_ECM_RECEPTOR_INTERACTION	KEGG_ECM_RECEPTOR_INTERACTION	43	0.358076	1.91879	0.00393639	0.0494469	0.0415318	2198	tags=53%, list=26%, signal=40%	ITGA1/HMMR/SPP1/COL4A2/SV2C/COL6A3/LAMA3/CD36/FN1/COL4A6/ITGA11/TNC/COL4A1/COL1A1/RELN/LAMA4/GP5/CD47/ITGA2/SDC2/LAMA1/ITGA10/COL1A2
GOBP_MUSCLE_ADAPTATION	GOBP_MUSCLE_ADAPTATION	GOBP_MUSCLE_ADAPTATION	41	0.362428	1.91616	0.00307828	0.0419707	0.0352524	1000	tags=32%, list=12%, signal=28%	MYOG/MEF2A/RPS6KB1/TNNT1/BECN1/TRPC3/SMAD3/RGS4/IGF1/CFLAR/AIF1/HEY2/TNFRSF1A
GOBP_RESPONSE_TO_ISOQUINOLINE_ALKALOID	GOBP_RESPONSE_TO_ISOQUINOLINE_ALKALOID	GOBP_RESPONSE_TO_ISOQUINOLINE_ALKALOID	15	0.520911	1.91534	0.00467076	0.0546399	0.0458935	2129	tags=67%, list=25%, signal=50%	DRD2/CNR1/RGS4/AIF1/OPRK1/TACR3/OPRM1/PPP2R2A/SLC1A1/PRKCG
GOCC_BRUSH_BORDER_MEMBRANE	GOCC_BRUSH_BORDER_MEMBRANE	GOCC_BRUSH_BORDER_MEMBRANE	24	0.42755	1.91284	0.0060139	0.0654039	0.0549345	1107	tags=46%, list=13%, signal=40%	TRPM6/CA4/PLB1/SLC22A5/SLC26A4/CYBRD1/CD36/SLC28A2/GNA13/SLC34A1/MTTP
PASINI_SUZ12_TARGETS_DN	PASINI_SUZ12_TARGETS_DN	PASINI_SUZ12_TARGETS_DN	158	0.264387	1.91253	0.000159412	0.0046401	0.00389735	1406	tags=32%, list=17%, signal=27%	KIF5C/GAP43/FLRT3/FZD2/PDLIM3/PITX2/ACTA2/HS6ST2/CYP1B1/SETD7/TENM3/PAWR/WNT4/STEAP2/PLK2/GNG2/COLEC12/B2M/EFEMP1/BMP4/ABRACL/FN1/DOCK11/RRAS2/SERPINB9/SKIL/PLIN2/DSP/CSRP1/TMEM30A/CLDN12/VGLL3/PERP/SAMD4A/ACTN1/COL1A1/MALAT1/RO60/TMBIM1/GNG3/SH3BGRL/ANXA2/PDLIM5/FOSL2/PRICKLE1/MARVELD2/PKP2/PLOD2/ARAP3/SEMA3E
SMIRNOV_RESPONSE_TO_IR_2HR_UP	SMIRNOV_RESPONSE_TO_IR_2HR_UP	SMIRNOV_RESPONSE_TO_IR_2HR_UP	25	0.4254	1.91165	0.00555968	0.062062	0.0521276	2238	tags=56%, list=27%, signal=41%	PPM1D/FAS/SESN1/MDM2/PLK2/SLC30A1/KLF5/PMAIP1/GADD45A/ZBTB10/ATF3/SENP6/HLA-DPA1/ELK4
GOBP_REGULATION_OF_BODY_FLUID_LEVELS	GOBP_REGULATION_OF_BODY_FLUID_LEVELS	GOBP_REGULATION_OF_BODY_FLUID_LEVELS	143	0.26721	1.91147	0.000142963	0.00427627	0.00359175	2036	tags=41%, list=24%, signal=31%	PDPN/F5/MERTK/SERPINE2/TPH1/ENPP4/WNK4/DRD2/DGKE/STK39/ABAT/PAPSS2/VAV3/F2RL1/HPSE/PLSCR1/CD36/FN1/ADTRP/SCUBE1/ERBB4/PROS1/PLCG2/SLC4A5/CSRP1/PRLR/SLC4A1/ABCA12/MET/PROCR/GNA13/ACTN1/PLAT/CFTR/TFPI/NPR1/CYP4F12/OPRK1/PIK3CB/NPR3/CD34/XDH/LCK/FLG/GP5/DGKG/MT-CO2/FLG2/PEAR1/NFE2L2/F13A1/ITGA2/GNAQ/GRHL3/BLOC1S6/LNPK/AP3B1/CYP4F2
ROVERSI_GLIOMA_LOH_REGIONS	ROVERSI_GLIOMA_LOH_REGIONS	ROVERSI_GLIOMA_LOH_REGIONS	18	0.485187	1.91061	0.00393399	0.0494469	0.0415318	2731	tags=72%, list=33%, signal=49%	ANO5/PDPN/KCNJ8/CNTN4/STYX/GRIN2B/ADGRL3/EPHA5/ATF7IP/SLC6A5/PSMC6/CENPC/GUCY2C
GAUSSMANN_MLL_AF4_FUSION_TARGETS_F_UP	GAUSSMANN_MLL_AF4_FUSION_TARGETS_F_UP	GAUSSMANN_MLL_AF4_FUSION_TARGETS_F_UP	88	0.299119	1.90886	0.00082989	0.0167027	0.0140291	1616	tags=41%, list=19%, signal=33%	ABLIM1/SYNM/RNF150/SCN3A/HS6ST2/LMO7/ARHGEF3/C1orf54/DRAM1/PCTP/TP53INP1/BTN1A1/F2RL1/RGS4/IL17RD/BMP4/TMEM154/PLCG2/TMEM30A/EGFR/LRRCC1/PREX2/PIBF1/DKK3/PLAT/ADGRL3/CAST/ADGRG6/LIFR/PRICKLE1/NPR3/NDRG4/EPHA4/ATP8B4/MFAP5/NFKBIZ
WESTON_VEGFA_TARGETS	WESTON_VEGFA_TARGETS	WESTON_VEGFA_TARGETS	37	0.369906	1.90775	0.00608856	0.0658611	0.0553185	2419	tags=57%, list=29%, signal=40%	MPHOSPH10/LMO2/ISL1/PGF/THY1/COL6A3/DLEU2/EFEMP1/BMP4/ADORA2B/MMP2/NID2/SEMA5A/CD34/ESR1/SGCE/COL1A2/PRKCI/TRIM23/KDR/KRT7
GOBP_VASODILATION	GOBP_VASODILATION	GOBP_VASODILATION	13	0.539656	1.90645	0.00483939	0.0560438	0.0470727	1399	tags=62%, list=17%, signal=51%	ITGA1/NOS1/ADRB1/F2RL1/CPS1/ADORA2B/NPR3/KCNMA1
KEGG_NEUROACTIVE_LIGAND_RECEPTOR_INTERACTION	KEGG_NEUROACTIVE_LIGAND_RECEPTOR_INTERACTION	KEGG_NEUROACTIVE_LIGAND_RECEPTOR_INTERACTION	78	0.302766	1.90619	0.0013081	0.0231819	0.0194711	1563	tags=37%, list=19%, signal=31%	GLRA1/CCKBR/DRD2/NR3C1/CNR1/PTGER3/S1PR1/ADRB1/P2RX7/F2RL1/GLP1R/CHRND/GRM5/PRLR/ADORA2B/MC4R/ADCYAP1R1/RXFP1/GRIN2B/GABRB2/GABRB1/GRIN3A/LHCGR/OPRK1/GRIA1/TACR3/OPRM1/CHRM5/PTAFR
JAATINEN_HEMATOPOIETIC_STEM_CELL_DN	JAATINEN_HEMATOPOIETIC_STEM_CELL_DN	JAATINEN_HEMATOPOIETIC_STEM_CELL_DN	78	0.302445	1.90416	0.0013081	0.0231819	0.0194711	1483	tags=33%, list=18%, signal=28%	NELL2/SNCA/QPCT/F5/TOB1/CYP4F3/KCTD12/ITGAM/TGFBI/TXNIP/DENND2D/CYP1B1/STK17A/TRABD2A/CD36/ADTRP/RCAN3/SLC4A1/TENT5C/PYHIN1/ABCC13/CHI3L1/SLFN5/LCK/EPHA4/ANKRD55
WOOD_EBV_EBNA1_TARGETS_DN	WOOD_EBV_EBNA1_TARGETS_DN	WOOD_EBV_EBNA1_TARGETS_DN	25	0.423455	1.90291	0.00608499	0.0658611	0.0553185	1916	tags=56%, list=23%, signal=43%	ALCAM/GOLGA4/TGFBI/DYNLT3/PSMB8/TAX1BP1/GPNMB/CALCOCO2/UGP2/ABCC4/IQGAP1/MFAP5/GNAQ/ACTR2
GOBP_INOSITOL_PHOSPHATE_METABOLIC_PROCESS	GOBP_INOSITOL_PHOSPHATE_METABOLIC_PROCESS	GOBP_INOSITOL_PHOSPHATE_METABOLIC_PROCESS	28	0.410074	1.90116	0.00462943	0.0543093	0.0456159	1291	tags=39%, list=15%, signal=33%	SNCA/FGF2/SYNJ2/MTMR7/INPP1/IPMK/PLCG2/ADCYAP1R1/IMPA1/IP6K3/LHCGR
MADAN_DPPA4_TARGETS	MADAN_DPPA4_TARGETS	MADAN_DPPA4_TARGETS	27	0.411762	1.90106	0.00549473	0.0615273	0.0516785	2380	tags=59%, list=29%, signal=43%	ABCB1/SERPINB6/SPESP1/CA4/KLHL13/PRRC1/AP1S3/HOOK1/RNF17/STK31/EIF1AY/ZSCAN4/GPX2/SNAP91/NEUROD1/SHE
GOBP_AMINE_TRANSPORT	GOBP_AMINE_TRANSPORT	GOBP_AMINE_TRANSPORT	38	0.368027	1.90012	0.00441511	0.0531017	0.0446016	1454	tags=39%, list=17%, signal=33%	SNCA/DRD2/SYT13/CNR1/ABAT/SNCG/P2RX7/SYT5/RGS4/KMO/SYT17/SLC6A1/OPRK1/TRH/KCNA2
JOHNSTONE_PARVB_TARGETS_1_DN	JOHNSTONE_PARVB_TARGETS_1_DN	JOHNSTONE_PARVB_TARGETS_1_DN	25	0.422604	1.89908	0.00634765	0.0675085	0.0567023	1743	tags=52%, list=21%, signal=41%	GPX8/TMEM106B/ZC2HC1A/COL6A3/TNC/C5orf24/QKI/DNAJB14/FAT1/LIFR/ZRSR2/NPIPB5/ATP10D
NABA_MATRISOME_ASSOCIATED	NABA_MATRISOME_ASSOCIATED	NABA_MATRISOME_ASSOCIATED	182	0.25011	1.89825	0.000111526	0.00353101	0.00296579	1482	tags=32%, list=18%, signal=27%	FGF2/TIMP1/KITLG/PAPPA/ADAM23/SERPINE2/SERPINB6/HHIP/TCHH/SERPINI2/PGF/MUC4/IL16/SCUBE3/WNT4/MUC3A/NGLY1/EGF/FGF14/COLEC12/FREM2/MUC16/HPSE/BMP4/MASP1/IGF1/ADAMTS9/SCUBE1/SERPINB9/PARM1/VWC2/MMP2/INHBE/WNT8A/FRZB/PDGFC/C1QL3/TNFSF15/FREM3/ADAM12/PLAT/FGF1/MUC6/FGF23/ADAM32/SEMA5A/ANXA2/LTA/HPSE2/PLOD2/SEMA3E/CPAMD8/A2M/IL19/FLG/S100A7A/A2ML1/ADAMTSL3/TLL1
MANNE_COVID19_ICU_VS_HEALTHY_DONOR_PLATELETS_DN	MANNE_COVID19_ICU_VS_HEALTHY_DONOR_PLATELETS_DN	MANNE_COVID19_ICU_VS_HEALTHY_DONOR_PLATELETS_DN	62	0.320299	1.89793	0.00190812	0.030585	0.0256892	1593	tags=40%, list=19%, signal=33%	PAPPA/TGFBI/COL25A1/FAM241A/COL4A2/SETD7/DNAH12/LYSMD3/MAPK10/UTRN/RNFT1/AGBL3/COL4A1/CLIC5/TNS1/ADAM12/SMIM36/STXBP6/CD34/CPAMD8/A2M/PLD4/H4C9/PLCL1/STK26
GOBP_POSITIVE_REGULATION_OF_IMMUNE_SYSTEM_PROCESS	GOBP_POSITIVE_REGULATION_OF_IMMUNE_SYSTEM_PROCESS	GOBP_POSITIVE_REGULATION_OF_IMMUNE_SYSTEM_PROCESS	274	0.232105	1.89581	1.88e-05	0.000826061	0.000693832	2342	tags=41%, list=28%, signal=30%	BTN2A2/KITLG/STAT6/DPP4/PAK3/BTN3A1/ITGAM/BTN3A2/PGF/CNR1/STK39/THY1/HEXIM1/PAWR/SPN/C5/NOS2/RIPOR2/SUSD4/POU4F2/HHLA2/DHX58/BTN3A3/P2RX7/SPTA1/BTN1A1/VAV3/USP29/B2M/F2RL1/HLA-B/HSPH1/TRIM5/PLSCR1/CD36/MASP1/C3/SKAP1/IGF1/PLCG2/VTCN1/ADORA2B/INPP5D/FCRL3/RB1/C7/LYVE1/AIF1/CD38/LACC1/NLRC5/CD84/PYHIN1/HLA-DMB/DDX60/TRIM56/CD160/PTPN2/KLF10/EFNB3/LTA/PIK3CB/BTN2A3P/RUNX1/C8A/HAVCR1/LCK/PPARGC1B/MIC…
GOBP_DIGESTION	GOBP_DIGESTION	GOBP_DIGESTION	43	0.353398	1.89373	0.00500363	0.057272	0.0481043	2250	tags=47%, list=27%, signal=34%	SNX10/CCKBR/WNK4/PTGER3/STK39/SLC22A5/MUC4/CD36/MUC6/SLC26A7/OPRK1/NPR3/MOGAT2/CHRM5/CLPSL1/PGC/CAPN8/PRSS3/INAVA/NEUROD1
SERVITJA_LIVER_HNF1A_TARGETS_DN	SERVITJA_LIVER_HNF1A_TARGETS_DN	SERVITJA_LIVER_HNF1A_TARGETS_DN	68	0.311607	1.89242	0.00347201	0.0454594	0.0381826	2104	tags=49%, list=25%, signal=37%	SLC41A2/SLC30A10/DPP4/HSD17B2/LIN7A/C5/HOPX/PKHD1/ADGRF1/SLC22A7/CABYR/IL1RAP/IGF1/SLC25A45/SLCO1A2/EGFR/PDGFC/CMAHP/FGF1/TRAM1/FRK/LIFR/C8A/CAMK1D/CYP7B1/RASSF5/DDC/ALDH1L1/CELSR1/ESR1/ONECUT1/CYP4F2/FRAS1
GOBP_POSITIVE_REGULATION_OF_SMALL_GTPASE_MEDIATED_SIGNAL_TRANSDUCTION	GOBP_POSITIVE_REGULATION_OF_SMALL_GTPASE_MEDIATED_SIGNAL_TRANSDUCTION	GOBP_POSITIVE_REGULATION_OF_SMALL_GTPASE_MEDIATED_SIGNAL_TRANSDUCTION	27	0.409681	1.89145	0.00584084	0.064242	0.0539586	1940	tags=48%, list=23%, signal=37%	KITLG/RASGEF1A/ARHGEF3/F2RL1/IGF1/ADCYAP1R1/KRAS/RELN/SHOC2/PIK3CB/LRRC59/NOTCH2/SOS1
FONTAINE_THYROID_TUMOR_UNCERTAIN_MALIGNANCY_DN	FONTAINE_THYROID_TUMOR_UNCERTAIN_MALIGNANCY_DN	FONTAINE_THYROID_TUMOR_UNCERTAIN_MALIGNANCY_DN	12	0.550814	1.8892	0.00790239	0.0783725	0.0658273	1881	tags=67%, list=23%, signal=52%	PPIL4/KLK2/PLCG2/FRZB/CD38/LILRB3/IGSF10/CD274
GOBP_NEGATIVE_REGULATION_OF_SODIUM_ION_TRANSPORT	GOBP_NEGATIVE_REGULATION_OF_SODIUM_ION_TRANSPORT	GOBP_NEGATIVE_REGULATION_OF_SODIUM_ION_TRANSPORT	11	0.560456	1.88912	0.00785713	0.0781957	0.0656788	719	tags=45%, list=9%, signal=42%	SERPINE2/WNK4/STK39/HECW1/HECW2
GOBP_BONE_RESORPTION	GOBP_BONE_RESORPTION	GOBP_BONE_RESORPTION	23	0.42869	1.88894	0.00867605	0.0829897	0.0697053	1529	tags=57%, list=18%, signal=46%	SNX10/SPP1/PDK4/S1PR1/P2RX7/MC4R/INPP5D/CD38/ZNF675/LRRK1/PPARGC1B/CSF1R/TF
HP_ACUTE_KIDNEY_INJURY	HP_ACUTE_KIDNEY_INJURY	HP_ACUTE_KIDNEY_INJURY	13	0.534001	1.88648	0.00539931	0.0608836	0.0511378	868	tags=46%, list=10%, signal=41%	HELLPAR/DGKE/PKHD1/DAAM2/C3/BSND
MCBRYAN_PUBERTAL_BREAST_6_7WK_DN	MCBRYAN_PUBERTAL_BREAST_6_7WK_DN	MCBRYAN_PUBERTAL_BREAST_6_7WK_DN	28	0.406536	1.88476	0.0049692	0.0570588	0.0479253	1490	tags=43%, list=18%, signal=35%	TIMP1/ST6GALNAC5/CA4/SNRNP27/ACTA2/MPZ/UTRN/DSP/TNC/MYH11/PLOD2/UGT8
GOBP_REGULATION_OF_MUSCLE_ADAPTATION	GOBP_REGULATION_OF_MUSCLE_ADAPTATION	GOBP_REGULATION_OF_MUSCLE_ADAPTATION	32	0.38519	1.88426	0.00326305	0.0435663	0.0365925	1000	tags=34%, list=12%, signal=30%	MYOG/MEF2A/RPS6KB1/TNNT1/BECN1/TRPC3/SMAD3/RGS4/IGF1/AIF1/TNFRSF1A
GOBP_HUMORAL_IMMUNE_RESPONSE_MEDIATED_BY_CIRCULATING_IMMUNOGLOBULIN	GOBP_HUMORAL_IMMUNE_RESPONSE_MEDIATED_BY_CIRCULATING_IMMUNOGLOBULIN	GOBP_HUMORAL_IMMUNE_RESPONSE_MEDIATED_BY_CIRCULATING_IMMUNOGLOBULIN	19	0.465553	1.88203	0.00788938	0.0783725	0.0658273	3312	tags=79%, list=40%, signal=48%	C5/SUSD4/C3/C7/LTA/C8A/TREM2/CLU/PTPRC/HPX/IGHG4/BCL3/CR1/C1S/TNF
GOBP_VASCULAR_ENDOTHELIAL_GROWTH_FACTOR_PRODUCTION	GOBP_VASCULAR_ENDOTHELIAL_GROWTH_FACTOR_PRODUCTION	GOBP_VASCULAR_ENDOTHELIAL_GROWTH_FACTOR_PRODUCTION	16	0.503521	1.88138	0.00507277	0.0578798	0.0486149	1617	tags=50%, list=19%, signal=40%	ISL1/CYP1B1/C5/HPSE/C3/ADORA2B/EIF2AK3/BRCA1
BEIER_GLIOMA_STEM_CELL_DN	BEIER_GLIOMA_STEM_CELL_DN	BEIER_GLIOMA_STEM_CELL_DN	24	0.420241	1.88014	0.00739838	0.0747674	0.0627992	1675	tags=42%, list=20%, signal=33%	LRCH2/BTN2A2/IFIT5/TCEAL7/CACNA1A/INPP1/HLA-DMB/GPNMB/NFKBIZ/CD74
JAEGER_METASTASIS_UP	JAEGER_METASTASIS_UP	JAEGER_METASTASIS_UP	16	0.502823	1.87877	0.00532022	0.0602587	0.0506129	1343	tags=50%, list=16%, signal=42%	DDAH1/MERTK/SPP1/PAPSS2/FN1/MET/ADAM12/PLOD2
WANG_LMO4_TARGETS_DN	WANG_LMO4_TARGETS_DN	WANG_LMO4_TARGETS_DN	166	0.255722	1.87726	0.000149421	0.00439654	0.00369277	3028	tags=53%, list=36%, signal=34%	NCOA7/PPM1D/SYTL2/HMMR/SIPA1L2/KLF8/ACTA2/LIN7A/ACBD3/S1PR1/OCLN/PAPSS2/SYNPO2/B2M/HLA-B/DNAJC7/SPRYD7/NBR1/RAB18/RNFT1/LURAP1L/MYH14/KCNQ3/DDX60/NECAB1/GTF3C3/SUGT1/AKAP9/PIK3CB/SCFD1/ATAD1/CSGALNACT2/PHF6/IQGAP1/FUT8/NFKBIZ/GADD45A/CCDC15/DTX3L/NDUFAF2/PHF11/FAM126B/DTNA/SH3GLB1/NUFIP2/ACTR2/USP8/HEATR6/RNASEL/AP3B1/CWC27/RGS22/TMEM64/XIAP/CASC3/FXR1/SMIM14/PRPF40A/CDC37L1/ICA1L/MAPK1IP1L/RBM26…
EPPERT_CE_HSC_LSC	EPPERT_CE_HSC_LSC	EPPERT_CE_HSC_LSC	20	0.453519	1.87682	0.00738228	0.0747674	0.0627992	1801	tags=55%, list=22%, signal=43%	ABCB1/HLF/ALCAM/DRAM1/TCEAL9/TFPI/ADGRG6/ELK3/FRMD4B/HOXB3/PLSCR4
MIKKELSEN_MCV6_ICP_WITH_H3K4ME3_AND_H3K27ME3	MIKKELSEN_MCV6_ICP_WITH_H3K4ME3_AND_H3K27ME3	MIKKELSEN_MCV6_ICP_WITH_H3K4ME3_AND_H3K27ME3	17	0.487165	1.87552	0.00429219	0.0524558	0.0440591	1783	tags=59%, list=21%, signal=46%	TMEM255A/ACTA2/KCNA4/SUSD4/IGF1/COL1A1/PLAT/YPEL4/NCKAP5/CFAP65
GOMF_TRANSMEMBRANE_RECEPTOR_PROTEIN_KINASE_ACTIVITY	GOMF_TRANSMEMBRANE_RECEPTOR_PROTEIN_KINASE_ACTIVITY	GOMF_TRANSMEMBRANE_RECEPTOR_PROTEIN_KINASE_ACTIVITY	40	0.354509	1.87539	0.00321495	0.0431904	0.0362768	1467	tags=45%, list=18%, signal=37%	MERTK/EPHA6/BMPR1B/NTRK3/EPHA2/EFEMP1/NTRK2/ERBB4/EGFR/LTBP1/MET/MUSK/EFNB3/NRP1/ERBB3/EPHA5/EPHA4/CSF1R
NATSUME_RESPONSE_TO_INTERFERON_BETA_UP	NATSUME_RESPONSE_TO_INTERFERON_BETA_UP	NATSUME_RESPONSE_TO_INTERFERON_BETA_UP	22	0.433505	1.87483	0.00601609	0.0654039	0.0549345	1297	tags=45%, list=16%, signal=38%	FAS/GRB14/CASP7/MAPK10/HLA-B/HLA-C/MC4R/EIF2AK2/ENO3/FOSL2
GOBP_METAL_ION_TRANSPORT	GOBP_METAL_ION_TRANSPORT	GOBP_METAL_ION_TRANSPORT	331	0.22433	1.87444	6.17e-06	0.00032923	0.00027653	1529	tags=31%, list=18%, signal=26%	SNCA/NDFIP2/FGF2/HOMER2/ITPR2/SLC41A2/STC2/SERPINE2/SLC30A10/TRPM6/WNK4/DRD2/SCN3A/KCNN3/KCNA4/PSEN2/SLC9A9/MRLN/STK39/NOS1/SLC22A5/TRPC3/THY1/NKAIN4/KCNJ8/TRPA1/KCNH1/IL16/HECW1/EGF/RGS7/VMP1/TTYH1/HFE/CYBRD1/PKD1L2/STEAP2/P2RX7/CACNA1A/FGF14/SLC24A2/SLC9A7/B2M/RGS4/SLC4A7/SCN2A/TMC1/SCN7A/HECW2/NSF/SLC6A15/STAC/UTRN/PLCG2/SLC4A5/NALCN/PTPN3/FCRL3/TMC2/CACNB4/ADCYAP1R1/SLC6A12/SLC6A13/ATP1A4/SLC…
GOBP_CYTOKINE_PRODUCTION	GOBP_CYTOKINE_PRODUCTION	GOBP_CYTOKINE_PRODUCTION	249	0.235569	1.87349	6.53e-05	0.00229505	0.00192768	1687	tags=33%, list=20%, signal=27%	HDAC9/BTN2A2/HOMER2/MERTK/IL12RB2/ALOX5/BTN3A1/TRIM21/DRD2/BTN3A2/ISL1/CYP1B1/SPN/C5/IL16/CD2AP/NOS2/HHLA2/DHX58/HFE/BTN3A3/P2RX7/SMAD3/BTN1A1/PLA2R1/EPHA2/SELENOS/B2M/F2RL1/HLA-B/HPSE/DTX4/CEBPB/CD36/IL1RAP/FN1/C3/IGF1/PLCG2/TMF1/TRIM38/VTCN1/ADORA2B/INPP5D/LTBP1/CD200R1/PIBF1/LITAF/AIF1/OAS3/LACC1/CYLD/CD84/EIF2AK2/PYHIN1/TRIM56/CD160/NAV3/STAT3/GPNMB/LTA/CHI3L1/BTN2A3P/RUNX1/CD34/EIF2AK3/PLD4/…
GOBP_REGULATION_OF_ION_TRANSPORT	GOBP_REGULATION_OF_ION_TRANSPORT	GOBP_REGULATION_OF_ION_TRANSPORT	268	0.232336	1.87208	3.52e-05	0.00139578	0.00117236	1529	tags=31%, list=18%, signal=26%	SNCA/ABCB1/HOMER2/STC2/SERPINE2/SLC30A10/WNK4/DRD2/SCN3A/SYT13/KCNA4/PSEN2/MRLN/CNR1/STK39/NOS1/ABAT/TRPC3/THY1/NKAIN4/KCNJ8/SNCG/KCNH1/IL16/HECW1/EGF/RGS7/VMP1/HFE/P2RX7/CACNA1A/PLA2R1/FGF14/SYT5/B2M/RGS4/PRKG2/SCN2A/CEBPB/TMC1/SCN7A/GRM5/HECW2/PRKAA1/BEST3/STAC/UTRN/PLCG2/NALCN/PTPN3/FCRL3/TMC2/CACNB4/ADCYAP1R1/KMO/SLC34A1/CD84/SLC30A1/KCNQ3/SYT17/CLIC5/CFTR/FGF23/EPPIN/RELN/KCNS3/SLC6A1/NETO2/…
WP_ENDODERM_DIFFERENTIATION	WP_ENDODERM_DIFFERENTIATION	WP_ENDODERM_DIFFERENTIATION	62	0.315594	1.87006	0.00260969	0.037359	0.0313788	2396	tags=48%, list=29%, signal=35%	DDAH1/TRIM71/HOXA1/TRERF1/NR3C1/SESN1/SIAH2/FOXA1/SMAD3/VAV3/TRIM5/AEBP2/TCEAL2/ASCC3/WNT8A/GRHL2/CDC73/PHF6/PAX3/MIXL1/JARID2/MBTD1/ONECUT1/PARP8/ELP4/ELK4/PIAS1/FOXN3/HOXC11/LAMC1
HOELZEL_NF1_TARGETS_DN	HOELZEL_NF1_TARGETS_DN	HOELZEL_NF1_TARGETS_DN	50	0.337202	1.86938	0.00280974	0.0393794	0.0330758	1474	tags=36%, list=18%, signal=30%	HDAC9/FAT3/ST8SIA1/ST6GALNAC5/BOC/PDK4/FRMD4A/NTRK3/GREM2/FN1/SLC16A14/C7/GUCY1A2/ADGRL3/AK5/PRICKLE1/HMCN1/CAMK1D
TAKEDA_TARGETS_OF_NUP98_HOXA9_FUSION_16D_DN	TAKEDA_TARGETS_OF_NUP98_HOXA9_FUSION_16D_DN	TAKEDA_TARGETS_OF_NUP98_HOXA9_FUSION_16D_DN	51	0.335539	1.86829	0.00364555	0.0468651	0.0393633	1510	tags=37%, list=18%, signal=31%	SVIP/FCGBP/CYP4F3/SYNJ2/DPP4/MGAM/CPNE2/FRMD4A/SEPSECS-AS1/ADTRP/CFLAR/PARM1/CEACAM6/TNS1/TFPI/SPAG1/CHI3L1/ELL2/BHLHE41
HP_INFERTILITY	HP_INFERTILITY	HP_INFERTILITY	70	0.302319	1.86681	0.00255174	0.0365963	0.0307383	1523	tags=37%, list=18%, signal=31%	TEX14/DNAH5/DDX3Y/NR3C1/DNAH8/DNAH10/SPEF2/PWRN1/DNAH2/HFE/PLIN1/PRLR/CFAP70/CFTR/CFAP221/DNAH9/SPAG1/BTG4/BLM/LHCGR/FSIP2/DNAAF4/SEMA3E/MNS1/DNAH11/DRC1
GOBP_REGULATION_OF_CYTOSOLIC_CALCIUM_ION_CONCENTRATION	GOBP_REGULATION_OF_CYTOSOLIC_CALCIUM_ION_CONCENTRATION	GOBP_REGULATION_OF_CYTOSOLIC_CALCIUM_ION_CONCENTRATION	104	0.278091	1.86669	0.00105492	0.0198655	0.0166855	1470	tags=32%, list=18%, signal=26%	SNCA/FGF2/ITPR2/CCKBR/DRD2/CALB1/CNR1/PTGER3/NOS1/TRPC3/THY1/RIC3/TRPA1/S1PR1/P2RX7/CACNA1A/SMAD3/SLC24A2/F2RL1/GLP1R/CD36/GRM5/PLCG2/ADCYAP1R1/GNA13/CD38/GRIN2B/GNG3/RYR3/TRDN/GRIA1/LCK/GP5
WINZEN_DEGRADED_VIA_KHSRP	WINZEN_DEGRADED_VIA_KHSRP	WINZEN_DEGRADED_VIA_KHSRP	36	0.362963	1.86551	0.00584989	0.064242	0.0539586	3338	tags=67%, list=40%, signal=40%	PAPPA/SERPINE2/LMO2/SCG5/ZFAND6/CLDN12/SMPDL3A/PDGFC/TMC7/PMAIP1/NFKBIZ/CXCL3/FRY/SDC2/CPEB4/SLC4A4/ANKRA2/GREM1/SERPINI1/ELOVL4/STK38L/TNF/TGFA/GEM
GOMF_ENDOPEPTIDASE_REGULATOR_ACTIVITY	GOMF_ENDOPEPTIDASE_REGULATOR_ACTIVITY	GOMF_ENDOPEPTIDASE_REGULATOR_ACTIVITY	55	0.327888	1.86303	0.0035817	0.0462654	0.0388596	1504	tags=36%, list=18%, signal=30%	SNCA/TIMP1/SERPINE2/SERPINB6/SERPINI2/C5/COL6A3/C3/SPINK5/SERPINB9/PROS1/UCHL5/TFPI/EPPIN/CAST/ANXA2/CPAMD8/A2M/A2ML1/NLRP1
HP_PERICARDITIS	HP_PERICARDITIS	HP_PERICARDITIS	12	0.543065	1.86262	0.00940334	0.0874737	0.0734716	2339	tags=67%, list=28%, signal=48%	ERAP1/FAS/HLA-B/LACC1/TNFRSF1A/STAT4/HLA-DPA1/HLA-DPB1
THUM_SYSTOLIC_HEART_FAILURE_UP	THUM_SYSTOLIC_HEART_FAILURE_UP	THUM_SYSTOLIC_HEART_FAILURE_UP	170	0.251405	1.8625	0.000230821	0.00621723	0.00522202	2378	tags=45%, list=28%, signal=33%	SERPINE2/DOCK2/ERAP1/MFGE8/GPX8/FAS/DNAJB4/BTN3A2/SLC9A9/IL2RG/PCNP/NFIA/SKAP2/CDC42EP3/ITGBL1/PLK2/NTRK3/MAN1A1/RGS4/NAMPT/UTRN/NBR1/VGLL3/PDGFC/AIF1/LURAP1L/DKK3/CMAHP/CLIC5/PLAT/FGF1/NECAB1/ZNF217/ATP1B4/MRC1/MINDY2/PRRX1/ENPP2/FRMD5/TMED2/TRDN/PKP2/EPHA4/BCLAF1/PREPL/GADD45A/ANKRD12/CD74/ID4/RAB5A/LYRM7/F13A1/CNKSR3/MYOM3/PLSCR4/NOTCH2/CCDC144NL-AS1/MORF4L1/ACTR2/SS18/NORAD/FBXO32/MSR1/SDC2/H…
SMID_BREAST_CANCER_RELAPSE_IN_BONE_DN	SMID_BREAST_CANCER_RELAPSE_IN_BONE_DN	SMID_BREAST_CANCER_RELAPSE_IN_BONE_DN	91	0.289522	1.86186	0.00189724	0.030525	0.0256388	1361	tags=31%, list=16%, signal=26%	PDPN/GLDC/QPCT/SYNM/IL12RB2/ST8SIA1/MFGE8/DNAJB4/COL4A2/PAX6/FNDC4/TTYH1/ACAN/MUC16/PRAME/EGFR/TRIM29/LTBP1/CHI3L2/PERP/QKI/KLF5/KYNU/ANP32E/DSG1/NMU/PLOD2/STXBP6
REACTOME_DAP12_SIGNALING	REACTOME_DAP12_SIGNALING	REACTOME_DAP12_SIGNALING	13	0.526851	1.86122	0.00643916	0.0681557	0.0572458	1940	tags=69%, list=23%, signal=53%	VAV3/B2M/PLCG2/GRAP2/KRAS/PIK3CB/LCK/TREM2/SOS1
GOBP_SODIUM_ION_TRANSMEMBRANE_TRANSPORT	GOBP_SODIUM_ION_TRANSMEMBRANE_TRANSPORT	GOBP_SODIUM_ION_TRANSMEMBRANE_TRANSPORT	77	0.296781	1.86114	0.00194508	0.0310181	0.026053	1492	tags=38%, list=18%, signal=31%	WNK4/SCN3A/SLC9A9/STK39/NOS1/HECW1/FGF14/SLC24A2/SLC9A7/SLC4A7/SCN2A/SCN7A/HECW2/SLC6A15/UTRN/SLC4A5/NALCN/PTPN3/SLC6A12/SLC6A13/ATP1A4/SLC34A1/SLC12A1/SLC6A1/NETO2/FXYD5/SLC17A4/SLC6A2/SCN10A
GOBP_POSITIVE_REGULATION_OF_INFLAMMATORY_RESPONSE	GOBP_POSITIVE_REGULATION_OF_INFLAMMATORY_RESPONSE	GOBP_POSITIVE_REGULATION_OF_INFLAMMATORY_RESPONSE	41	0.35201	1.86107	0.00411153	0.0509783	0.042818	1861	tags=46%, list=22%, signal=36%	SNCA/CAMK2N1/CNR1/PTGER3/IL16/CEBPB/C3/PLCG2/ADORA2B/TNFRSF1A/PDE2A/LTA/C2CD4B/MGST2/TREM2/NLRP1/NFKBIZ/CD47/ITGA2
HP_WHEEZING	HP_WHEEZING	HP_WHEEZING	21	0.441609	1.86005	0.00911296	0.0856591	0.0719474	1523	tags=48%, list=18%, signal=39%	DNAH5/NOS1/SPEF2/CFTR/CFAP221/DNAH9/SPAG1/DNAAF4/DNAH11/DRC1
REACTOME_ANCHORING_FIBRIL_FORMATION	REACTOME_ANCHORING_FIBRIL_FORMATION	REACTOME_ANCHORING_FIBRIL_FORMATION	11	0.550925	1.85699	0.00944344	0.0876209	0.0735952	2416	tags=73%, list=29%, signal=52%	COL4A2/LAMA3/COL4A6/COL4A1/COL1A1/TLL1/COL1A2/COL4A5
NABA_COLLAGENS	NABA_COLLAGENS	NABA_COLLAGENS	27	0.401714	1.85466	0.00713879	0.0731304	0.0614242	1358	tags=48%, list=16%, signal=40%	COL9A1/COL25A1/COL15A1/COL4A2/COL24A1/COL6A3/COL22A1/COL4A6/COL13A1/COL4A1/COL1A1/COL21A1/COL17A1
REACTOME_COLLAGEN_CHAIN_TRIMERIZATION	REACTOME_COLLAGEN_CHAIN_TRIMERIZATION	REACTOME_COLLAGEN_CHAIN_TRIMERIZATION	27	0.401714	1.85466	0.00713879	0.0731304	0.0614242	1358	tags=48%, list=16%, signal=40%	COL9A1/COL25A1/COL15A1/COL4A2/COL24A1/COL6A3/COL22A1/COL4A6/COL13A1/COL4A1/COL1A1/COL21A1/COL17A1
WOTTON_RUNX_TARGETS_DN	WOTTON_RUNX_TARGETS_DN	WOTTON_RUNX_TARGETS_DN	17	0.481071	1.85206	0.00478272	0.0555499	0.0466579	1408	tags=47%, list=17%, signal=39%	KITLG/ALCAM/SIPA1L2/SIX1/NR3C1/PRRX1/PLOD2/XDH
GOBP_EPITHELIAL_TUBE_BRANCHING_INVOLVED_IN_LUNG_MORPHOGENESIS	GOBP_EPITHELIAL_TUBE_BRANCHING_INVOLVED_IN_LUNG_MORPHOGENESIS	GOBP_EPITHELIAL_TUBE_BRANCHING_INVOLVED_IN_LUNG_MORPHOGENESIS	11	0.549157	1.85103	0.00991957	0.0903357	0.0758754	2139	tags=73%, list=26%, signal=54%	HHIP/FOXA1/BMP4/KRAS/CELSR1/RSPO2/WNT2B/LAMA1
GOBP_REGULATION_OF_CALCIUM_ION_TRANSPORT	GOBP_REGULATION_OF_CALCIUM_ION_TRANSPORT	GOBP_REGULATION_OF_CALCIUM_ION_TRANSPORT	86	0.28931	1.85029	0.00134083	0.0236074	0.0198285	1002	tags=27%, list=12%, signal=24%	SNCA/HOMER2/STC2/DRD2/PSEN2/MRLN/NOS1/TRPC3/THY1/IL16/EGF/VMP1/P2RX7/RGS4/TMC1/STAC/PLCG2/FCRL3/TMC2/CACNB4/ADCYAP1R1/CD84/SLC30A1
LU_EZH2_TARGETS_DN	LU_EZH2_TARGETS_DN	LU_EZH2_TARGETS_DN	143	0.258596	1.84985	0.000283978	0.00724951	0.00608906	1878	tags=36%, list=22%, signal=29%	DDAH1/ZNF483/FAM169A/DYNLT3/PCNP/GRB14/ANTXR1/BLZF1/ARMH4/PAPSS2/DLEU2/IL17RD/FBN2/DNAJC13/SPTLC1/TMEM154/EGFR/ASCC3/LITAF/DSG2/GNA13/TNFSF15/COL4A1/ELOVL6/PLAT/SCML2/ADGRG6/N4BP2/GJC1/LILRB3/ELL2/PSMD12/BCLAF1/RASSF5/ZNF493/NFKBIZ/TSPYL2/SEC63/PTPN12/ARHGEF10/DTWD2/MIGA1/PALLD/CREB5/PLSCR4/TERF1/MYBL1/UTP3/SEC24A/SRPX/PPTC7/DIPK2A
ROVERSI_GLIOMA_COPY_NUMBER_DN	ROVERSI_GLIOMA_COPY_NUMBER_DN	ROVERSI_GLIOMA_COPY_NUMBER_DN	15	0.503023	1.84957	0.00822543	0.0801612	0.0673296	1550	tags=60%, list=19%, signal=49%	KLHL32/CPNE2/LRP1B/ADAM12/KYNU/POU3F2/GPR63/KCNMA1/TAF3
BLANCO_MELO_COVID19_BRONCHIAL_EPITHELIAL_CELLS_SARS_COV_2_INFECTION_DN	BLANCO_MELO_COVID19_BRONCHIAL_EPITHELIAL_CELLS_SARS_COV_2_INFECTION_DN	BLANCO_MELO_COVID19_BRONCHIAL_EPITHELIAL_CELLS_SARS_COV_2_INFECTION_DN	24	0.413383	1.84946	0.00930459	0.0868536	0.0729507	1428	tags=46%, list=17%, signal=38%	CYP4F3/PDK4/TSC22D3/VAV3/PROS1/VTCN1/FGF1/GPNMB/SPTLC3/SEMA3E/EPHA4
HP_NASAL_CONGESTION	HP_NASAL_CONGESTION	HP_NASAL_CONGESTION	19	0.457252	1.84847	0.0101056	0.0909709	0.076409	1655	tags=47%, list=20%, signal=38%	DNAH5/SPEF2/CFAP221/DNAH9/SPAG1/DNAAF4/DNAH11/DRC1/DDC
BROWNE_HCMV_INFECTION_48HR_UP	BROWNE_HCMV_INFECTION_48HR_UP	BROWNE_HCMV_INFECTION_48HR_UP	80	0.290675	1.84725	0.00210432	0.0323659	0.027185	987	tags=25%, list=12%, signal=22%	SNCA/CTNNA2/ITPR2/RUNDC3B/GREB1/LMO2/PTGER3/NFIA/FRRS1L/SLC22A5/PAWR/PPM1H/CD2AP/NTRK3/DNAJC7/SKIL/PLCG2/SLC6A12/SRSF8/GABPA
DELYS_THYROID_CANCER_DN	DELYS_THYROID_CANCER_DN	DELYS_THYROID_CANCER_DN	96	0.283875	1.84599	0.0020549	0.0318775	0.0267748	1206	tags=33%, list=14%, signal=29%	GLDC/HLF/SYNM/TOB1/FCGBP/CRABP1/CA4/DNAJB4/LMO2/GNAI1/TLE4/GRB14/TSC22D3/LIPG/LRP1B/SLC26A4/CYBRD1/PLA2R1/SGCD/FAXDC2/CD36/NUCB2/RGS17/UCHL5/FMO2/NEB/MPPED2/ADH1B/TFPI/NPR1/RELN/LIFR
WUNDER_INFLAMMATORY_RESPONSE_AND_CHOLESTEROL_UP	WUNDER_INFLAMMATORY_RESPONSE_AND_CHOLESTEROL_UP	WUNDER_INFLAMMATORY_RESPONSE_AND_CHOLESTEROL_UP	20	0.445579	1.84396	0.00870363	0.0830882	0.0697881	2167	tags=60%, list=26%, signal=45%	SERPINI2/CASP7/PSMB8/B2M/HLA-B/PSMB9/AIF1/HLA-DMB/NFKBIZ/CD74/PRSS3/ERO1A
GOBP_REGULATION_OF_COAGULATION	GOBP_REGULATION_OF_COAGULATION	GOBP_REGULATION_OF_COAGULATION	22	0.42626	1.8435	0.00721076	0.0735892	0.0618096	1395	tags=55%, list=17%, signal=46%	SERPINE2/ENPP4/ABAT/F2RL1/HPSE/CD36/ADTRP/PROS1/PROCR/PLAT/TFPI/CD34
GOMF_MOLECULAR_TRANSDUCER_ACTIVITY	GOMF_MOLECULAR_TRANSDUCER_ACTIVITY	GOMF_MOLECULAR_TRANSDUCER_ACTIVITY	369	0.216614	1.84164	7.91e-06	0.000404212	0.000339509	1486	tags=30%, list=18%, signal=25%	GLRA1/RARB/MERTK/CCKBR/NGFR/IL12RB2/FZD2/GPR12/EPHA6/DRD2/GPR85/FAS/EDA2R/NR3C2/PKHD1L1/BMPR1B/NR3C1/IL2RG/CNR1/PTGER3/MMD/SPN/S1PR1/ADRB1/SEC62/GPR179/OPN5/ANTXR1/P2RX7/BTN1A1/PLA2R1/NTRK3/EPHA2/PKHD1/COLEC12/ADGRF1/ANXA2R/SELENOS/F2RL1/GLP1R/IL17RD/TRIM5/EFEMP1/TREML4/CD302/CHRND/CD36/IL1RAP/GRM5/ITGA11/ITGAX/GFRA1/NTRK2/ERBB4/CD300E/PRLR/GPR78/EGFR/ADORA2B/MC4R/IL22RA1/FCRL3/LTBP1/OR4D1/CD200R…
KORKOLA_YOLK_SAC_TUMOR	KORKOLA_YOLK_SAC_TUMOR	KORKOLA_YOLK_SAC_TUMOR	25	0.409762	1.84137	0.00994248	0.090361	0.0758967	763	tags=32%, list=9%, signal=29%	SALL1/PTPN13/CCKBR/FLRT3/C5/CEP70/COL4A6/ERBB4
HP_AKINESIA	HP_AKINESIA	HP_AKINESIA	17	0.478281	1.84132	0.00535499	0.0604629	0.0507844	1289	tags=47%, list=15%, signal=40%	SNCA/FGF14/CHRND/DNAJC13/MUSK/NEB/MAPT/ERBB3
GOBP_DIENCEPHALON_DEVELOPMENT	GOBP_DIENCEPHALON_DEVELOPMENT	GOBP_DIENCEPHALON_DEVELOPMENT	34	0.36652	1.84037	0.00883294	0.0838293	0.0704105	1270	tags=38%, list=15%, signal=33%	FGF2/SALL1/NDNF/PTCHD1/PITX2/DRD2/ISL1/PAX6/WNT4/BMP4/NRP1/SEMA5A/POU3F2
HP_MULTIFACTORIAL_INHERITANCE	HP_MULTIFACTORIAL_INHERITANCE	HP_MULTIFACTORIAL_INHERITANCE	30	0.386151	1.84017	0.00607206	0.0658141	0.0552791	1617	tags=40%, list=19%, signal=32%	DYNC2H1/F5/ALOX5/HLA-B/HLA-C/BMP4/FRZB/ADH1B/IRF6/A2ML1/NLRP1/BRCA1
HP_ABNORMAL_ATRIAL_ARRANGEMENT	HP_ABNORMAL_ATRIAL_ARRANGEMENT	HP_ABNORMAL_ATRIAL_ARRANGEMENT	17	0.477799	1.83947	0.00535499	0.0604629	0.0507844	1523	tags=47%, list=18%, signal=39%	DNAH5/SPEF2/CFAP221/DNAH9/SPAG1/DNAAF4/DNAH11/DRC1
GOCC_EXTRINSIC_COMPONENT_OF_PLASMA_MEMBRANE	GOCC_EXTRINSIC_COMPONENT_OF_PLASMA_MEMBRANE	GOCC_EXTRINSIC_COMPONENT_OF_PLASMA_MEMBRANE	77	0.293141	1.83831	0.00262912	0.0375074	0.0315035	1933	tags=42%, list=23%, signal=32%	CTNNA2/SERPINE2/SYTL2/CDH18/MFGE8/GNAI1/CDH8/RGS8/GNG2/CYTH3/SCUBE1/STAC/GNA13/EEA1/CYLD/LPAL2/SNX9/KRAS/FRK/CDH13/GNG3/AKAP9/CDH11/LCK/GNB4/TF/IQGAP1/GNAL/FMR1/GNAQ/ESYT3/USP8
HUPER_BREAST_BASAL_VS_LUMINAL_DN	HUPER_BREAST_BASAL_VS_LUMINAL_DN	HUPER_BREAST_BASAL_VS_LUMINAL_DN	23	0.416862	1.83682	0.0115385	0.0993945	0.0834842	821	tags=35%, list=10%, signal=31%	DDAH1/ALCAM/MLPH/MYO6/PSMB8/HLA-B/EFEMP1/PSMB9
TAKEDA_TARGETS_OF_NUP98_HOXA9_FUSION_16D_UP	TAKEDA_TARGETS_OF_NUP98_HOXA9_FUSION_16D_UP	TAKEDA_TARGETS_OF_NUP98_HOXA9_FUSION_16D_UP	62	0.309801	1.83573	0.00388047	0.0489701	0.0411313	1814	tags=39%, list=22%, signal=31%	HDAC9/ABCB1/HOMER2/ABCB4/NEGR1/GNAI1/ADRB1/CDC42EP3/AP1S3/HOPX/FN1/LTBP1/SMPDL3A/CD38/OAS3/SLITRK4/ELOVL6/BEND6/NCALD/XAF1/CLNK/HOXB3/PALLD/AFF3
GOMF_TRANSMEMBRANE_RECEPTOR_PROTEIN_TYROSINE_KINASE_ACTIVITY	GOMF_TRANSMEMBRANE_RECEPTOR_PROTEIN_TYROSINE_KINASE_ACTIVITY	GOMF_TRANSMEMBRANE_RECEPTOR_PROTEIN_TYROSINE_KINASE_ACTIVITY	33	0.370693	1.83479	0.00698204	0.0721389	0.0605914	1467	tags=48%, list=18%, signal=40%	MERTK/EPHA6/NTRK3/EPHA2/EFEMP1/NTRK2/ERBB4/EGFR/MET/MUSK/EFNB3/NRP1/ERBB3/EPHA5/EPHA4/CSF1R
VERHAAK_AML_WITH_NPM1_MUTATED_DN	VERHAAK_AML_WITH_NPM1_MUTATED_DN	VERHAAK_AML_WITH_NPM1_MUTATED_DN	94	0.281812	1.83392	0.0025408	0.0365426	0.0306932	2471	tags=50%, list=30%, signal=36%	SNCA/ABLIM1/ABCB1/MLLT3/SERPINE2/FZD2/ENDOD1/MEF2A/TM6SF1/B4GALT6/TGFBI/GNAI1/H1-0/PDE3B/HOPX/MAN1A1/F2RL1/PRAME/MPO/CEACAM6/CD38/TFPI/MYH11/CHI3L1/TRH/NPR3/CD34/SPON1/PMAIP1/PTPRM/IFI16/HGF/P2RX5/MEF2C/DACH1/OTULINL/THSD7A/HLA-DPA1/MDFIC/NIBAN1/SMAGP/HLA-DPB1/MEG3/LAMC1/NEDD4/SIDT1/MTMR11
CHYLA_CBFA2T3_TARGETS_UP	CHYLA_CBFA2T3_TARGETS_UP	CHYLA_CBFA2T3_TARGETS_UP	138	0.257018	1.8339	0.00140543	0.0243959	0.0204908	1529	tags=33%, list=18%, signal=27%	PPM1K/CFAP57/TM6SF1/B4GALT6/ICA1/TGFBI/KLF8/MGAM/ARHGEF3/ARMCX4/ZC2HC1A/ELOVL7/C1orf54/TSC22D3/DRAM1/P2RX7/GOLGA5/RASGRP2/HPSE/UACA/CEBPB/PPIC/GFRA1/PLCG2/NALCN/MAP3K15/SLC28A2/TESMIN/TNFRSF1A/IRF6/PDE2A/PLPP2/PKD1L3/MAST4/PRSS16/ARL11/DSG1/MGST2/KLHL5/CYTH4/CD34/MOGAT2/PLD4/ATP8B4/TF
HP_AORTIC_DISSECTION	HP_AORTIC_DISSECTION	HP_AORTIC_DISSECTION	14	0.507071	1.82732	0.0091399	0.0856856	0.0719697	1576	tags=50%, list=19%, signal=41%	TENT5A/ACTA2/SMAD3/HLA-B/HEY2/MYH11/MFAP5
GOCC_APICAL_PART_OF_CELL	GOCC_APICAL_PART_OF_CELL	GOCC_APICAL_PART_OF_CELL	171	0.246168	1.82648	0.000409317	0.00969822	0.0081458	1593	tags=32%, list=19%, signal=27%	PDPN/DYNC2H1/ABCB1/HOMER2/ABCB4/SNX10/IFIT5/TNIK/TRPM6/DPP4/CA4/MGAM/PSEN2/PLB1/LMO7/STK39/SLC22A5/THY1/SLC26A4/OCLN/RIPOR2/HFE/CYBRD1/PKHD1/SLC4A7/PRKG2/CD36/FN1/PRKAA1/SLC4A5/RAB18/TMEM30A/CEACAM6/SLC34A1/SLC22A8/CLIC5/PLAT/FAT1/CFTR/SLC12A1/SLC15A2/CYP4F12/CHL1/ERBB3/DSG1/MARVELD2/ADCY10/SLC17A4/CD34/KCNMA1/ABCC4/MAL2/TF/CD300LG/STK26
BROWNE_HCMV_INFECTION_8HR_DN	BROWNE_HCMV_INFECTION_8HR_DN	BROWNE_HCMV_INFECTION_8HR_DN	22	0.422198	1.82593	0.00814943	0.0797135	0.0669536	1224	tags=41%, list=15%, signal=35%	FZD2/SPN/CDC42EP3/RIPOR2/SMAD3/BMP4/PLIN2/CMAHP/NAV3
HP_PLEURAL_EFFUSION	HP_PLEURAL_EFFUSION	HP_PLEURAL_EFFUSION	20	0.441073	1.82532	0.0096983	0.0892211	0.0749393	1121	tags=40%, list=13%, signal=35%	ERAP1/HELLPAR/FAS/SPP1/HFE/HLA-B/LACC1/CFTR
GOBP_HORMONE_METABOLIC_PROCESS	GOBP_HORMONE_METABOLIC_PROCESS	GOBP_HORMONE_METABOLIC_PROCESS	68	0.300479	1.82484	0.00524516	0.0595956	0.050056	555	tags=25%, list=7%, signal=24%	CYP2S1/PNPLA4/STC2/CRABP1/DPP4/HSD17B2/PCSK2/SPP1/GCNT4/PLB1/CYP1B1/SCG5/WNT4/FOXA1/HFE/PAPSS2/AKR1B10
GOBP_REGULATION_OF_LEUKOCYTE_MEDIATED_CYTOTOXICITY	GOBP_REGULATION_OF_LEUKOCYTE_MEDIATED_CYTOTOXICITY	GOBP_REGULATION_OF_LEUKOCYTE_MEDIATED_CYTOTOXICITY	21	0.43324	1.8248	0.0103053	0.0922195	0.0774577	1115	tags=43%, list=13%, signal=37%	ITGAM/NOS2/P2RX7/B2M/F2RL1/HLA-B/SERPINB9/MICA/CD160
GOMF_EXTRACELLULAR_MATRIX_STRUCTURAL_CONSTITUENT	GOMF_EXTRACELLULAR_MATRIX_STRUCTURAL_CONSTITUENT	GOMF_EXTRACELLULAR_MATRIX_STRUCTURAL_CONSTITUENT	83	0.287662	1.82389	0.00209856	0.0323378	0.0271614	1729	tags=42%, list=21%, signal=34%	COL9A1/MFGE8/TGFBI/COL25A1/COL15A1/COL4A2/MUC4/COL24A1/MUC3A/COL6A3/LAMA3/ABI3BP/COL22A1/ACAN/EFEMP1/FBN2/FN1/COL4A6/COL13A1/LTBP1/TNC/COL4A1/COL1A1/MUC6/NID2/COL21A1/EDIL3/CHI3L1/HMCN1/COL17A1/LAMA4/SPON1/MFAP5/COL12A1/MATN3
WAMUNYOKOLI_OVARIAN_CANCER_GRADES_1_2_UP	WAMUNYOKOLI_OVARIAN_CANCER_GRADES_1_2_UP	WAMUNYOKOLI_OVARIAN_CANCER_GRADES_1_2_UP	66	0.301882	1.82363	0.0042099	0.0517421	0.0434596	1469	tags=33%, list=18%, signal=28%	DDAH1/SYTL2/SYT13/STK39/C3orf52/MYO6/ABCC3/NME7/GALNT7/ESRP1/PERP/C5orf24/ELOVL6/CMPK1/KLF5/FRK/GDA/TM9SF3/ERBB3/ELL2/MAL2/ETNK1
GOMF_SODIUM_ION_TRANSMEMBRANE_TRANSPORTER_ACTIVITY	GOMF_SODIUM_ION_TRANSMEMBRANE_TRANSPORTER_ACTIVITY	GOMF_SODIUM_ION_TRANSMEMBRANE_TRANSPORTER_ACTIVITY	62	0.307729	1.82345	0.00433433	0.052792	0.0443415	2657	tags=58%, list=32%, signal=40%	SCN3A/SLC9A9/SLC24A2/SLC9A7/SLC4A7/SCN2A/SCN7A/SLC6A15/SLC4A5/NALCN/SLC28A2/SLC6A12/SLC6A13/ATP1A4/SLC34A1/SLC12A1/SLC6A1/SLC17A4/SLC6A2/SCN10A/SLC10A5/SCN9A/SLC5A5/SLC6A4/SLC1A1/SLC13A1/ATP1A2/SLC1A2/SLC6A5/SLC23A1/ATP1B1/SLC13A2/SLC5A12/TRPM2/SCN1B/SLC4A4
BENPORATH_PRC2_TARGETS	BENPORATH_PRC2_TARGETS	BENPORATH_PRC2_TARGETS	231	0.23113	1.82291	0.000113861	0.00357215	0.00300035	1973	tags=38%, list=24%, signal=30%	LRCH2/REPS2/MLLT3/DDAH1/PAPPA/CNRIP1/SLCO5A1/ANKRD18B/CAMK2N1/FZD2/ANKRD18A/HHIP/PITX2/SIX1/GPR12/COL25A1/ISL1/PTGER3/COL24A1/RPS6KA6/PAX6/KCNH1/CA10/ADRB1/SLC26A4/SUSD4/ELMOD1/TTYH1/POU4F2/COLEC12/ADCY4/ANKRD20A1/ANXA2R/BARHL2/DCHS2/FBN2/COL4A6/NTRK2/PARM1/ERBB4/LHX6/SPAG6/DPY19L2/ALKAL1/ECEL1/PGM5/IKZF3/SERTM1/MAPT/KCNQ3/MIR137HG/ANKRD20A8P/TCEA3/ADGRL3/SLC6A1/GRIN3A/HPSE2/RYR3/ILDR2/TRH/EPHA5/…
BASSO_HAIRY_CELL_LEUKEMIA_UP	BASSO_HAIRY_CELL_LEUKEMIA_UP	BASSO_HAIRY_CELL_LEUKEMIA_UP	35	0.35999	1.82265	0.00753473	0.0757531	0.0636271	1576	tags=40%, list=19%, signal=33%	FGF2/TIMP1/KCTD12/EPB41L2/B2M/PPIC/SMPDL3A/AIF1/TNFRSF1A/PLOD2/SLITRK5/BMERB1/PTPRM/MFAP5
RAO_BOUND_BY_SALL4_ISOFORM_B	RAO_BOUND_BY_SALL4_ISOFORM_B	RAO_BOUND_BY_SALL4_ISOFORM_B	195	0.238297	1.82199	0.000130754	0.00397699	0.00334038	1978	tags=33%, list=24%, signal=26%	HDAC9/ABLIM1/BTN2A2/MAP7D3/GAP43/MLLT3/HLF/ADAM23/GDAP1L1/SERPINB6/ST8SIA1/NDUFA5/PITX2/HSD17B2/SPP1/PIP4P2/PCNP/ARHGEF3/DNAH14/PAX6/SKAP2/ZFAND6/STEAP2/SPTA1/VAV3/TRIM5/BMP4/GRAP2/RAB18/PRLR/CBX1/RCN1/CCP110/LRRCC1/ZBTB41/CD38/RO60/RAI14/TFPI/NID2/SHOC2/SLC6A1/UFM1/TRH/DCTN6/EPHA4/ANKRD55/TRA2A/LYPLA1/KLHL31/SRSF5/GADD45A/EIF1AY/PTPN12/NFE2L2/CD47/ZCRB1/MBTD1/DIPK2A/CD274/TCEAL8/GRHL3/TMPRSS7/G2…
PID_AVB3_INTEGRIN_PATHWAY	PID_AVB3_INTEGRIN_PATHWAY	PID_AVB3_INTEGRIN_PATHWAY	44	0.337337	1.82189	0.0087723	0.0833946	0.0700455	1467	tags=36%, list=18%, signal=30%	FGF2/COL9A1/MFGE8/RPS6KB1/SPP1/COL15A1/COL6A3/VAV3/FN1/COL4A6/COL13A1/COL4A1/COL1A1/EDIL3/COL17A1/CSF1R
GOBP_CELLULAR_HORMONE_METABOLIC_PROCESS	GOBP_CELLULAR_HORMONE_METABOLIC_PROCESS	GOBP_CELLULAR_HORMONE_METABOLIC_PROCESS	36	0.354158	1.82025	0.00820664	0.0801276	0.0673014	1012	tags=33%, list=12%, signal=29%	CYP2S1/PNPLA4/CRABP1/HSD17B2/SPP1/PLB1/CYP1B1/WNT4/AKR1B10/CYP27C1/DKK3/ADH1B
GOCC_PLATELET_ALPHA_GRANULE_LUMEN	GOCC_PLATELET_ALPHA_GRANULE_LUMEN	GOCC_PLATELET_ALPHA_GRANULE_LUMEN	24	0.406719	1.81964	0.0113915	0.0985205	0.0827501	1877	tags=50%, list=22%, signal=39%	TIMP1/F5/EGF/FN1/IGF1/PROS1/ACTN1/A2M/CLU/APOOL/F13A1/HGF
NUYTTEN_EZH2_TARGETS_UP	NUYTTEN_EZH2_TARGETS_UP	NUYTTEN_EZH2_TARGETS_UP	447	0.212143	1.81921	2.16e-06	0.000125962	0.000105799	1809	tags=31%, list=22%, signal=26%	NCOA7/LIPA/PPM1K/IFIT5/KITLG/CNRIP1/TENT5A/STC2/CPNE8/SERPINE2/TNIK/RGL1/FLRT3/PARP12/ERAP1/ENDOD1/B4GALT6/TRIM21/TGFBI/RBM11/FAS/DNAJB4/NR3C2/PIP4P2/OVOL1/TXNIP/LMO2/TLE4/PSEN2/SLC9A9/TMEM106B/LARP6/STK39/SLC22A5/EIF5A2/C1orf54/SPTSSA/C3orf52/DRAM1/PRSS35/MAP2/CASP7/S1PR1/NECTIN3/CDC42EP3/SPEF2/WNT4/SPAG9/BLZF1/SUSD4/GCNT2/LAMA3/BTN3A3/PLK2/MAN1A1/PSMB8/B2M/RGS4/HLA-B/TRIM5/EFEMP1/HLA-C/PLSCR1/C…
GOCC_COLLAGEN_TRIMER	GOCC_COLLAGEN_TRIMER	GOCC_COLLAGEN_TRIMER	35	0.359215	1.81873	0.00779015	0.0776005	0.0651788	1358	tags=43%, list=16%, signal=36%	COL9A1/COL25A1/COL15A1/COL4A2/COL24A1/COL6A3/COLEC12/COL22A1/COL4A6/COL13A1/C1QL3/COL4A1/COL1A1/COL21A1/COL17A1
GOBP_ADENYLATE_CYCLASE_ACTIVATING_G_PROTEIN_COUPLED_RECEPTOR_SIGNALING_PATHWAY	GOBP_ADENYLATE_CYCLASE_ACTIVATING_G_PROTEIN_COUPLED_RECEPTOR_SIGNALING_PATHWAY	GOBP_ADENYLATE_CYCLASE_ACTIVATING_G_PROTEIN_COUPLED_RECEPTOR_SIGNALING_PATHWAY	54	0.322122	1.8184	0.00790384	0.0783725	0.0658273	1946	tags=44%, list=23%, signal=34%	GPR12/DRD2/CNR1/PTGER3/S1PR1/ADRB1/GNG2/ADCY4/ADGRF1/GLP1R/GPR78/ADORA2B/MC4R/GNA13/RXFP1/ADGRL3/ADGRG6/LHCGR/OPRM1/ADGRE2/GNAL/GNAQ/RAPGEF4/LGR4
OHGUCHI_LIVER_HNF4A_TARGETS_UP	OHGUCHI_LIVER_HNF4A_TARGETS_UP	OHGUCHI_LIVER_HNF4A_TARGETS_UP	21	0.43168	1.81823	0.0108163	0.0951411	0.0799116	687	tags=33%, list=8%, signal=31%	ABCB1/QPCT/TXNIP/PDK4/ELOVL7/DRAM1/CD36
GOBP_COMPLEMENT_ACTIVATION	GOBP_COMPLEMENT_ACTIVATION	GOBP_COMPLEMENT_ACTIVATION	17	0.472088	1.81748	0.00658131	0.069254	0.0581684	1567	tags=53%, list=19%, signal=43%	C5/SUSD4/MASP1/C3/C7/C8A/A2M/TREM2/CLU
GOBP_WOUND_HEALING	GOBP_WOUND_HEALING	GOBP_WOUND_HEALING	168	0.246699	1.81589	0.000435672	0.0102553	0.00861373	1943	tags=36%, list=23%, signal=28%	PDPN/FGF2/NDNF/TIMP1/F5/MERTK/SERPINE2/ALOX5/ENPP4/ACTA2/DGKE/ABAT/CHMP2B/OCLN/WNT4/PAPSS2/SMAD3/VAV3/F2RL1/SYTL4/HPSE/PLSCR1/CD36/FN1/IGF1/ADTRP/CFLAR/SCUBE1/PROS1/PLCG2/DSP/CSRP1/SLC4A1/PROCR/GNA13/ACTN1/COL1A1/PLAT/FGF1/TFPI/FKBP10/PPL/ERBB3/PIK3CB/ELK3/CD34/OPRM1/LCK/GP5/FGFR1OP2/DGKG/PDCD10/PEAR1/NFE2L2/F13A1/NOTCH2/ITGA2/GNAQ/GRHL3/BLOC1S6/LNPK
ZHAN_MULTIPLE_MYELOMA_MS_UP	ZHAN_MULTIPLE_MYELOMA_MS_UP	ZHAN_MULTIPLE_MYELOMA_MS_UP	26	0.39984	1.81505	0.00908412	0.0855329	0.0718414	1859	tags=54%, list=22%, signal=42%	SERPINE2/RUNDC3B/FZD2/LARP6/PPM1H/MAGI1/KLHL13/TCEAL2/DSG2/DSEL/TRIM58/PALLD/DTNA/MYRIP
GOBP_REGULATION_OF_BONE_REMODELING	GOBP_REGULATION_OF_BONE_REMODELING	GOBP_REGULATION_OF_BONE_REMODELING	20	0.438436	1.8144	0.0108588	0.0953025	0.0800472	1529	tags=55%, list=18%, signal=45%	SPP1/PDK4/S1PR1/SUCO/P2RX7/MC4R/INPP5D/CD38/PPARGC1B/CSF1R/TF
GOCC_PRESYNAPTIC_MEMBRANE	GOCC_PRESYNAPTIC_MEMBRANE	GOCC_PRESYNAPTIC_MEMBRANE	74	0.291607	1.81337	0.00349785	0.0455773	0.0382817	1495	tags=35%, list=18%, signal=29%	KCTD16/ERC2/ADAM23/KCTD12/RIMS1/DRD2/STX1B/CNR1/OTOF/KCNH1/ITSN2/SCN2A/ZNRF2/ERBB4/PDE2A/EFNB3/SLC6A1/OPRK1/FCHO2/OPRM1/KCNJ9/SLC6A2/EPHA4/KCNA2/SCN10A/PRRT2
GOCC_MICROTUBULE_ASSOCIATED_COMPLEX	GOCC_MICROTUBULE_ASSOCIATED_COMPLEX	GOCC_MICROTUBULE_ASSOCIATED_COMPLEX	69	0.295421	1.813	0.00269383	0.0382792	0.0321518	1024	tags=29%, list=12%, signal=26%	KIF5C/DYNC2H1/DNAH5/KIF7/ACTA2/DYNLT3/DNAH8/SHTN1/DNAH14/DNAH10/MAP2/DNAH6/DNAH12/DNAH2/DYNLL2/KIF5A/KIF20B/KIF3A/DNAH7/CFAP70
CHIARADONNA_NEOPLASTIC_TRANSFORMATION_CDC25_UP	CHIARADONNA_NEOPLASTIC_TRANSFORMATION_CDC25_UP	CHIARADONNA_NEOPLASTIC_TRANSFORMATION_CDC25_UP	51	0.325536	1.8126	0.00563967	0.0625697	0.052554	1639	tags=39%, list=20%, signal=32%	PDPN/CRABP1/PDK4/LMO7/CYP1B1/THY1/PLA2R1/GREM2/PLSCR1/CEBPB/C3/TNC/CASP4/ANP32E/CHI3L1/XDH/LAMA4/IFI16/TAF1D/IGSF10
HP_ABNORMAL_CORNEAL_EPITHELIUM_MORPHOLOGY	HP_ABNORMAL_CORNEAL_EPITHELIUM_MORPHOLOGY	HP_ABNORMAL_CORNEAL_EPITHELIUM_MORPHOLOGY	36	0.35262	1.81235	0.00854332	0.082375	0.069189	1504	tags=39%, list=18%, signal=32%	PRDM5/ERAP1/TGFBI/FAS/PAX6/NGLY1/HLA-B/COL4A6/PLCG2/ABCA12/MTTP/COL17A1/NIPAL4/NLRP1
REACTOME_CELL_SURFACE_INTERACTIONS_AT_THE_VASCULAR_WALL	REACTOME_CELL_SURFACE_INTERACTIONS_AT_THE_VASCULAR_WALL	REACTOME_CELL_SURFACE_INTERACTIONS_AT_THE_VASCULAR_WALL	55	0.318939	1.81219	0.00547834	0.0615273	0.0516785	2283	tags=47%, list=27%, signal=35%	MERTK/ITGAM/GRB14/APOB/SPN/FN1/ITGAX/PROS1/INPP5D/SELL/CEACAM6/PROCR/CD84/COL1A1/KRAS/PECAM1/PIK3CB/LCK/CD74/CD47/SOS1/SDC2/GRB7/COL1A2/ATP1B1/YES1
GOBP_MICROTUBULE_BUNDLE_FORMATION	GOBP_MICROTUBULE_BUNDLE_FORMATION	GOBP_MICROTUBULE_BUNDLE_FORMATION	44	0.33533	1.81106	0.00962396	0.0888391	0.0746184	2265	tags=48%, list=27%, signal=35%	DNAH5/DNAH8/MAP2/SPEF2/DNAH2/CCDC66/TPPP2/SPAG6/DNAH7/SPAG1/FSIP2/DNAAF4/MNS1/DRC1/NCKAP5/CFAP65/NAV1/CFAP43/TTLL6/CCDC65/UBE2B
FONTAINE_PAPILLARY_THYROID_CARCINOMA_DN	FONTAINE_PAPILLARY_THYROID_CARCINOMA_DN	FONTAINE_PAPILLARY_THYROID_CARCINOMA_DN	35	0.357687	1.81099	0.0081307	0.0797135	0.0669536	1395	tags=43%, list=17%, signal=36%	F5/FCGBP/MLPH/SPEF2/PPIL4/KLK2/SH3RF2/CYTH3/PLCG2/CT75/FRZB/CD38/ABCA8/LILRB3/CD34
SMID_BREAST_CANCER_LUMINAL_A_UP	SMID_BREAST_CANCER_LUMINAL_A_UP	SMID_BREAST_CANCER_LUMINAL_A_UP	34	0.360556	1.81042	0.0114056	0.0985237	0.0827528	2150	tags=53%, list=26%, signal=39%	HLF/STC2/PTGER3/PLIN1/FAXDC2/IGF1/GFRA1/SVEP1/ADH1B/ABCA8/ENPP2/MYH11/RUNX1/F13A1/ESR1/ATP1A2/ATRNL1/MAP3K12
JOHNSTONE_PARVB_TARGETS_2_DN	JOHNSTONE_PARVB_TARGETS_2_DN	JOHNSTONE_PARVB_TARGETS_2_DN	159	0.249414	1.81	0.000512366	0.0115422	0.00969463	3530	tags=62%, list=42%, signal=36%	ALCAM/CPNE8/FAM126A/RUNDC3B/ENPP4/TRERF1/NR3C1/PCNP/STK17A/MAP2/NECTIN3/MANEA/SMURF2/LIN7C/GCNT2/CHML/GXYLT1/F2RL1/POPDC3/RUNX2/DCUN1D1/GALNT7/PDGFC/UCHL5/ATF1/GTF2A1/RO60/CAP2/PHC3/CCDC126/UFL1/TM9SF3/OXR1/MOB1B/DSEL/ETNK1/ARL5A/C1GALT1/ARHGEF10/RNF19A/NUFIP2/LNPK/DACH1/SLK/OSBPL8/XRN1/FXR1/AKIRIN1/ERO1A/RBMS3/RBM26/SMC3/RAP2C/LINC00888/FUBP1/STK17B/B3GALNT1/SHOX2/CDK13/MMUT/SRRM1/PARVA/WIPF1/SS…
GOBP_RESPONSE_TO_FIBROBLAST_GROWTH_FACTOR	GOBP_RESPONSE_TO_FIBROBLAST_GROWTH_FACTOR	GOBP_RESPONSE_TO_FIBROBLAST_GROWTH_FACTOR	38	0.350212	1.80814	0.00853007	0.0823634	0.0691793	1203	tags=34%, list=14%, signal=29%	FGF2/NDNF/TRIM71/NGFR/FLRT3/HHIP/WNT4/RUNX2/CPS1/COL1A1/FGF1/FGF23/SHOC2
DEURIG_T_CELL_PROLYMPHOCYTIC_LEUKEMIA_DN	DEURIG_T_CELL_PROLYMPHOCYTIC_LEUKEMIA_DN	DEURIG_T_CELL_PROLYMPHOCYTIC_LEUKEMIA_DN	126	0.260771	1.80813	0.00115959	0.0213823	0.0179596	3350	tags=60%, list=40%, signal=36%	ABCB1/ALCAM/GSAP/SYTL2/TNIK/ST8SIA1/FAS/GALNT10/NR3C2/STK17A/HOPX/MAN1A1/CFLAR/TCEAL2/IKZF3/SRSF8/PNISR/CYLD/CD84/CASP4/CIR1/CD160/STAT3/ANXA2/NLRP1/TRIM22/PMAIP1/PTPRM/PPP1R12A/UBL3/SRSF5/TAF1D/TRAF3IP3/ANKRD12/IK/PJA2/ARHGEF10/ARID4B/N4BP2L2/RNF19A/KLHL2/STAT4/HLA-DPA1/PTPRC/HNRNPH3/SGCB/NIBAN1/HAUS3/TRIM23/RAP2C/HLA-DPB1/RDX/FUBP1/SYT11/RBM48/PGRMC2/MAP3K5/THOC1/TBX21/SNHG14/MAN2A1/RCBTB2/CCSE…
GAUSSMANN_MLL_AF4_FUSION_TARGETS_G_UP	GAUSSMANN_MLL_AF4_FUSION_TARGETS_G_UP	GAUSSMANN_MLL_AF4_FUSION_TARGETS_G_UP	98	0.277729	1.80547	0.00138133	0.0241631	0.0202953	2505	tags=47%, list=30%, signal=33%	GAP43/NDNF/SYTL2/NEGR1/SYT13/ACTA2/FRRS1L/CYP1B1/MUC16/FBN2/DAAM2/C3/IGF1/PTPN3/RNFT1/LYVE1/MAPT/MPPED2/ADH1B/CLMP/RAI14/RELN/SUB1/POU3F2/MGST2/NCALD/TRIP11/OPRM1/UBL3/SESN3/BBS7/MXRA8/PALLD/AGPS/GRHL3/P2RX5/DOCK10/FBXO32/C1D/HSD17B11/CREBRF/SYT11/CHODL/VTA1/SLC35D3/ST8SIA5
GOBP_EPIDERMAL_CELL_DIFFERENTIATION	GOBP_EPIDERMAL_CELL_DIFFERENTIATION	GOBP_EPIDERMAL_CELL_DIFFERENTIATION	61	0.306916	1.80441	0.00563781	0.0625697	0.052554	1297	tags=38%, list=16%, signal=32%	MACROH2A2/PITX2/TCHH/OVOL1/TXNIP/EXPH5/PAX6/MYO6/EPHA2/SLC4A7/BMP4/TMC1/SPINK5/DSP/ABCA12/KRT10/ESRP1/HEY2/IRF6/GRHL2/CNFN/PPL/FOSL2
HP_ACQUIRED_ABNORMAL_HAIR_PATTERN	HP_ACQUIRED_ABNORMAL_HAIR_PATTERN	HP_ACQUIRED_ABNORMAL_HAIR_PATTERN	15	0.49049	1.80348	0.0103845	0.0927755	0.0779247	1661	tags=53%, list=20%, signal=43%	NECTIN4/NR3C1/WNT4/ANTXR1/SLC6A1/BLM/COL17A1/CHD2
GOCC_9PLUS2_MOTILE_CILIUM	GOCC_9PLUS2_MOTILE_CILIUM	GOCC_9PLUS2_MOTILE_CILIUM	53	0.321364	1.8029	0.00997883	0.090419	0.0759454	2015	tags=42%, list=24%, signal=32%	DRD2/DNAH5/DNAH8/CCDC181/SPEF2/DNAH2/CABYR/TPPP2/SPAG6/ATP1A4/CFAP70/CFAP221/DNAH9/SLC22A14/FSIP2/TACR3/MNS1/DNAH11/CFAP65/SEPTIN7/CFAP43/CATSPER4
AFFAR_YY1_TARGETS_UP	AFFAR_YY1_TARGETS_UP	AFFAR_YY1_TARGETS_UP	85	0.281854	1.80246	0.00132756	0.0234117	0.0196641	1794	tags=38%, list=21%, signal=30%	ALCAM/NGFR/TPH1/PDLIM3/HHIP/FAS/TXNIP/ABAT/PRSS35/PAWR/CASP7/MDM2/ST6GALNAC3/TP53INP1/EPHA2/EFEMP1/BMP4/MASP1/EGFR/MMP2/PERP/MYH3/TNNC2/CFTR/SPAG1/PLOD2/TAP1/PMAIP1/CLU/ID4/MAP6/PLCB4
PECE_MAMMARY_STEM_CELL_DN	PECE_MAMMARY_STEM_CELL_DN	PECE_MAMMARY_STEM_CELL_DN	59	0.312768	1.80205	0.00505873	0.0577805	0.0485314	3321	tags=63%, list=40%, signal=38%	FAT3/KITLG/SLC41A2/TXNIP/GNG2/SLC24A2/FN1/RGS17/GPRASP1/PNISR/RO60/NPEPPS/SPON1/FGFR1OP2/NPIPB5/UBL3/SNED1/SEC63/GUCY1B1/KLHL28/KPNB1/CNEP1R1/SCAF4/UBE2K/NEAT1/REXO2/ATRX/NEMF/RAB2B/PCDHB10/PCM1/COG6/CDC5L/SLC30A7/MARCHF7/JAK1/CCNL1
NABA_CORE_MATRISOME	NABA_CORE_MATRISOME	NABA_CORE_MATRISOME	118	0.261719	1.80026	0.00106067	0.0198917	0.0167076	1659	tags=36%, list=20%, signal=30%	NELL2/NDNF/COL9A1/PCOLCE2/MFGE8/TGFBI/COL25A1/SPP1/COL15A1/SLIT3/COL4A2/CRISPLD1/COL24A1/COL6A3/LAMA3/ABI3BP/COL22A1/ACAN/EFEMP1/FBN2/FN1/COL4A6/COL13A1/LTBP1/TNC/SVEP1/COL4A1/COL1A1/NID2/RELN/COL21A1/HAPLN3/EDIL3/HMCN1/COL17A1/LAMA4/SPON1/VWA3A/VWA5B1/SNED1/MFAP5/IGSF10/COL12A1
GOBP_MEMBRANE_INVAGINATION	GOBP_MEMBRANE_INVAGINATION	GOBP_MEMBRANE_INVAGINATION	31	0.370954	1.80024	0.00802711	0.0791905	0.0665143	1486	tags=42%, list=18%, signal=35%	MFGE8/ITGAM/BECN1/F2RL1/CD36/C3/PLCG2/AIF1/SNX9/BIN2/FCHO2/HAVCR1/TREM2
GOCC_APICAL_PLASMA_MEMBRANE	GOCC_APICAL_PLASMA_MEMBRANE	GOCC_APICAL_PLASMA_MEMBRANE	143	0.251213	1.79704	0.000557252	0.0122891	0.0103219	1593	tags=34%, list=19%, signal=28%	PDPN/ABCB1/ABCB4/TNIK/TRPM6/DPP4/CA4/MGAM/PSEN2/PLB1/LMO7/STK39/SLC22A5/THY1/SLC26A4/OCLN/RIPOR2/CYBRD1/PKHD1/SLC4A7/PRKG2/CD36/FN1/PRKAA1/SLC4A5/RAB18/TMEM30A/CEACAM6/SLC34A1/SLC22A8/CLIC5/FAT1/CFTR/SLC12A1/SLC15A2/CYP4F12/ERBB3/DSG1/MARVELD2/ADCY10/SLC17A4/CD34/KCNMA1/ABCC4/MAL2/TF/CD300LG/STK26
REACTOME_INTEGRIN_CELL_SURFACE_INTERACTIONS	REACTOME_INTEGRIN_CELL_SURFACE_INTERACTIONS	REACTOME_INTEGRIN_CELL_SURFACE_INTERACTIONS	38	0.347566	1.79448	0.00939074	0.0874737	0.0734716	1058	tags=37%, list=13%, signal=32%	ITGA1/COL9A1/ITGAM/SPP1/COL4A2/COL6A3/FN1/COL4A6/ITGA11/ITGAX/COL13A1/TNC/COL4A1/COL1A1
GOBP_KERATINOCYTE_DIFFERENTIATION	GOBP_KERATINOCYTE_DIFFERENTIATION	GOBP_KERATINOCYTE_DIFFERENTIATION	35	0.354357	1.79413	0.00915486	0.0857516	0.0720251	1797	tags=49%, list=22%, signal=38%	MACROH2A2/TCHH/TXNIP/EXPH5/PAX6/EPHA2/DSP/ABCA12/KRT10/IRF6/GRHL2/CNFN/PPL/FOSL2/FLG/PALLD/SGPP1
GEORGES_TARGETS_OF_MIR192_AND_MIR215	GEORGES_TARGETS_OF_MIR192_AND_MIR215	GEORGES_TARGETS_OF_MIR192_AND_MIR215	401	0.211114	1.79387	2.27e-06	0.000130959	0.000109996	2383	tags=38%, list=29%, signal=29%	KIF5C/NDFIP2/FGF2/LIPA/SNX10/ALCAM/HMMR/TRIM68/FAM126A/KCTD12/PGAP4/PCOLCE2/PDLIM3/ENPP4/ENDOD1/RPS6KB1/B4GALT6/ZNF385B/CCDC47/MOSMO/DNAJB4/OVOL1/ZMAT3/FAM171B/FAM241A/OSBPL10/RADX/PAWR/CASP7/PRKAA2/KDM1B/SPAG9/CHSY3/SASS6/FOXA1/CGNL1/PRRC1/LYSMD3/CHML/ZNF652/UACA/UBE2D1/ARNTL2/IL1RAP/NUCB2/NSF/CNTNAP3/SLC16A14/TMEM30A/RB1/LRRCC1/EAF2/VGLL3/PERP/KIF20B/EEA1/ATF1/C2orf49/IMPA1/CMPK1/RPAP3/RNPC3/MI…
GOBP_NEGATIVE_REGULATION_OF_IMMUNE_SYSTEM_PROCESS	GOBP_NEGATIVE_REGULATION_OF_IMMUNE_SYSTEM_PROCESS	GOBP_NEGATIVE_REGULATION_OF_IMMUNE_SYSTEM_PROCESS	152	0.248091	1.79334	0.000462822	0.0107773	0.00905214	1736	tags=34%, list=21%, signal=28%	BTN2A2/KITLG/MERTK/STAT6/DPP4/TRIM21/DRD2/CNR1/THY1/TSC22D3/PAWR/SPN/C5/RIPOR2/SUSD4/DHX58/HFE/PLK2/SELENOS/HLA-B/BMP4/CEBPB/SPINK5/ADTRP/SERPINB9/VTCN1/INPP5D/FCRL3/CD200R1/PIBF1/OAS3/NLRC5/CD84/MICA/CD160/PTPN2/FBXW7/GPNMB/ZNF675/ILDR2/LILRB3/RUNX1/A2M/TREM2/USP15/CLNK/TRIB1/IFI16/CD74/APPL1/ZC3H8/CD47
PEDERSEN_TARGETS_OF_611CTF_ISOFORM_OF_ERBB2	PEDERSEN_TARGETS_OF_611CTF_ISOFORM_OF_ERBB2	PEDERSEN_TARGETS_OF_611CTF_ISOFORM_OF_ERBB2	33	0.362271	1.7931	0.00984934	0.0902443	0.0757987	1343	tags=42%, list=16%, signal=36%	LMO7/C3orf52/AP1S3/DNM3/F2RL1/SLC4A7/PARM1/EGFR/COL13A1/MET/SH2D3A/ACTN1/TFPI/PLOD2
CHEN_HOXA5_TARGETS_9HR_UP	CHEN_HOXA5_TARGETS_9HR_UP	CHEN_HOXA5_TARGETS_9HR_UP	99	0.27421	1.79236	0.00235232	0.0348439	0.0292664	3758	tags=74%, list=45%, signal=41%	STC2/ZCCHC10/SCG5/TLK2/CEBPB/PIBF1/DNAJC2/KLF5/PTPN2/KLF10/FOSL2/NEDD9/PMAIP1/PPP1R12A/IFI16/TAF1D/PPIG/ARID4B/CREB5/CNOT4/SEC24A/ATF3/RYBP/SREK1/LINS1/MTHFD2L/AKIRIN1/MORC3/TANK/KRCC1/RELB/ODR4/WAC/FNBP4/RABGGTB/CENPC/SNX16/SLTM/GPATCH2/CDK7/RSRC2/PRPF38B/ZNF267/CCNT2/NEMF/CTH/DPP8/KHDC4/ZCCHC8/ZNF131/FEM1C/LIG4/RCHY1/MARCHF7/PYROXD1/CLK1/CHD9/CCNL1/GEM/THAP9-AS1/NRBF2/ASNS/CLK4/IFRD1/TUT7/CEBPG…
CHEMNITZ_RESPONSE_TO_PROSTAGLANDIN_E2_DN	CHEMNITZ_RESPONSE_TO_PROSTAGLANDIN_E2_DN	CHEMNITZ_RESPONSE_TO_PROSTAGLANDIN_E2_DN	151	0.248397	1.7921	0.00071098	0.0148907	0.0125071	1383	tags=28%, list=17%, signal=24%	NDFIP2/KCTD16/KITLG/PAPPA/SYTL2/TRHDE-AS1/IL12RB2/RUNDC3B/DPP4/TXNIP/LMO7/RAB3IP/NFIA/OSBPL10/PRKAA2/OCLN/MUC3A/PTCHD4/AP1S3/PKHD1/FREM2/TPMT/CNTN4/TRIM38/SPAG6/CLDN12/MET/DSG2/UBXN10/FAT1/HCG11/MINDY2/RELN/EDIL3/SEMA5A/CHL1/PPL/PRICKLE1/SPTLC3/STXBP6/IQCH/REV3L
LEE_NEURAL_CREST_STEM_CELL_UP	LEE_NEURAL_CREST_STEM_CELL_UP	LEE_NEURAL_CREST_STEM_CELL_UP	62	0.302398	1.79186	0.00570125	0.0630559	0.0529624	1377	tags=32%, list=16%, signal=27%	GAP43/ALCAM/NGFR/CRABP1/PITX2/SORBS1/TGFBI/SCN3A/SPP1/CNR1/C3orf52/SGCD/ST7/SERPINB9/LITAF/TNNC2/ADGRG6/ERBB3/ELK3/NPR3
WIELAND_UP_BY_HBV_INFECTION	WIELAND_UP_BY_HBV_INFECTION	WIELAND_UP_BY_HBV_INFECTION	32	0.365964	1.79021	0.00750133	0.0755576	0.0634629	1675	tags=47%, list=20%, signal=38%	RGL1/PARP12/DENND2D/C1orf54/DRAM1/BTN3A3/B2M/HLA-B/PSMB9/CD38/HLA-DMB/GPNMB/TRIM22/IFI16/CD74
GOBP_VASCULATURE_DEVELOPMENT	GOBP_VASCULATURE_DEVELOPMENT	GOBP_VASCULATURE_DEVELOPMENT	301	0.217743	1.7891	5.71e-05	0.00206071	0.00173085	1418	tags=29%, list=17%, signal=25%	HDAC9/PDPN/DYNC2H1/FGF2/NDNF/DDAH1/HOXA1/NGFR/ERAP1/ALOX5/MFGE8/SIX1/TGFBI/ACTA2/MINAR1/COL15A1/ISL1/PGF/COL4A2/CYP1B1/THY1/APOB/PAX6/S1PR1/C5/WNT4/EGF/ANTXR1/MDM2/AIMP1/PDE3B/PLK2/SGCD/EPHA2/COL22A1/FUT1/VAV3/HPSE/BMP4/FN1/C3/ADAMTS9/ITGAX/SPINK5/NTRK2/ADTRP/CFLAR/VEZF1/STAB2/MMP2/GNA13/SVEP1/HEY2/QKI/COL4A1/PDE2A/COL1A1/ADAM12/FGF1/KLF5/CD160/NPR1/CDH13/PRRX1/ENPP2/FBXW7/FKBP10/PLCD3/NRP1/STAT3…
COLDREN_GEFITINIB_RESISTANCE_DN	COLDREN_GEFITINIB_RESISTANCE_DN	COLDREN_GEFITINIB_RESISTANCE_DN	90	0.278154	1.7863	0.00281125	0.0393794	0.0330758	2853	tags=52%, list=34%, signal=35%	REPS2/NECTIN4/ENPP4/ENDOD1/OVOL1/EXPH5/LMO7/FAM171B/STK39/ZNF681/MYO6/GCNT2/ADGRF1/VAV3/ARFGEF3/MYH14/IRF6/GRHL2/PPL/ERBB3/SPTLC3/MAL2/FRMD4B/RASEF/TMPRSS4/GRAMD1C/WDFY1/GUCY1B1/GRHL3/CAPN8/SLC1A1/ZNF506/MFSD6/KRT15/SMAGP/CLDN4/TMEM123/FAM3C/TBC1D8B/KANSL1-AS1/LNX1/SPOPL/CYP2J2/ZDHHC21/SLC35A3/DST/BSPRY
OISHI_CHOLANGIOMA_STEM_CELL_LIKE_DN	OISHI_CHOLANGIOMA_STEM_CELL_LIKE_DN	OISHI_CHOLANGIOMA_STEM_CELL_LIKE_DN	120	0.259441	1.7848	0.00178549	0.0292485	0.0245666	1257	tags=29%, list=15%, signal=25%	SNCA/TIMP1/QPCT/RARB/ADAM23/SYTL2/CYP4F3/ALOX5/PDLIM3/ACTA2/IL2RG/CYP1B1/BNC2/ABI3BP/PAPSS2/PLA2R1/HOPX/EPHA2/MANSC1/BCAS1/EFEMP1/NUCB2/INPP1/RCN1/PROCR/FMO2/DKK3/TRIM31/PAQR3/KLF5/TMBIM1/TMC7/FBXW7/FKBP10/CYP4F12
MEISSNER_BRAIN_HCP_WITH_H3K4ME2_AND_H3K27ME3	MEISSNER_BRAIN_HCP_WITH_H3K4ME2_AND_H3K27ME3	MEISSNER_BRAIN_HCP_WITH_H3K4ME2_AND_H3K27ME3	22	0.412227	1.78281	0.0103765	0.0927755	0.0779247	1137	tags=41%, list=14%, signal=35%	HOXA1/CRABP1/PITX2/TSC22D3/FOXA1/ACAN/PPIC/LHX6/TCEA3
GOBP_REGULATION_OF_BLOOD_PRESSURE	GOBP_REGULATION_OF_BLOOD_PRESSURE	GOBP_REGULATION_OF_BLOOD_PRESSURE	70	0.288571	1.78192	0.00485637	0.0561347	0.0471491	1395	tags=33%, list=17%, signal=28%	TRHDE/DDAH1/ERAP1/DRD2/ACTA2/CNR1/STK39/NOS1/ABAT/ADRB1/NOS2/SMAD3/F2RL1/GLP1R/KLK2/SLC4A5/GNA13/NPR1/CYP4F12/NCALD/TACR3/NPR3/CD34
LEIN_MIDBRAIN_MARKERS	LEIN_MIDBRAIN_MARKERS	LEIN_MIDBRAIN_MARKERS	37	0.345345	1.78108	0.0107182	0.0946253	0.0794784	852	tags=32%, list=10%, signal=29%	GLRA1/KANK4/PCOLCE2/ENDOD1/COL15A1/EIF5A2/TSC22D3/BNC2/STEAP2/DNM3/GFRA1/VAT1L
LU_IL4_SIGNALING	LU_IL4_SIGNALING	LU_IL4_SIGNALING	31	0.366864	1.7804	0.00913387	0.0856856	0.0719697	1616	tags=45%, list=19%, signal=37%	HOMER2/ALOX5/PKN2/SIAH2/GNG2/CFLAR/SELL/KMO/SPAG1/SLC15A2/CLTC/PHF20L1/PMAIP1/NFKBIZ
HP_ANOREXIA	HP_ANOREXIA	HP_ANOREXIA	36	0.345414	1.77531	0.0114192	0.0985237	0.0827528	3476	tags=69%, list=42%, signal=41%	ERAP1/FAS/CACNA1A/PKHD1/HLA-B/PTPN3/SLC4A1/KRAS/STAT3/RUNX1/BRCA1/FIP1L1/PALLD/STAT4/ATP1A2/MLX/MMUT/PRKAR1A/CDKN2B/ATRX/ALPL/CDKN1A/TBL1XR1/TGFB1/SMAD4
GOBP_POSITIVE_REGULATION_OF_CYTOKINE_PRODUCTION	GOBP_POSITIVE_REGULATION_OF_CYTOKINE_PRODUCTION	GOBP_POSITIVE_REGULATION_OF_CYTOKINE_PRODUCTION	155	0.24597	1.77256	0.000823607	0.0166469	0.0139822	1683	tags=34%, list=20%, signal=28%	IL12RB2/BTN3A1/DRD2/BTN3A2/ISL1/CYP1B1/SPN/C5/IL16/NOS2/HHLA2/DHX58/P2RX7/SMAD3/PLA2R1/B2M/F2RL1/HPSE/CEBPB/CD36/IL1RAP/C3/PLCG2/TMF1/VTCN1/ADORA2B/PIBF1/AIF1/OAS3/LACC1/CD84/EIF2AK2/PYHIN1/TRIM56/CD160/STAT3/LTA/CHI3L1/RUNX1/CD34/EIF2AK3/CSF1R/TREM2/NLRP1/RAB7B/CLNK/PTAFR/CLU/IFI16/BRCA1/CAMK4/CD74/APPL1
REACTOME_INTERLEUKIN_4_AND_INTERLEUKIN_13_SIGNALING	REACTOME_INTERLEUKIN_4_AND_INTERLEUKIN_13_SIGNALING	REACTOME_INTERLEUKIN_4_AND_INTERLEUKIN_13_SIGNALING	45	0.326501	1.77137	0.00954541	0.0883399	0.0741992	834	tags=27%, list=10%, signal=24%	FGF2/TIMP1/STAT6/ALOX5/ITGAM/IL2RG/S1PR1/NOS2/CD36/FN1/ITGAX/MMP2
GOBP_REGULATION_OF_METAL_ION_TRANSPORT	GOBP_REGULATION_OF_METAL_ION_TRANSPORT	GOBP_REGULATION_OF_METAL_ION_TRANSPORT	154	0.245539	1.77099	0.00120583	0.021981	0.0184625	1529	tags=31%, list=18%, signal=25%	SNCA/HOMER2/STC2/SERPINE2/SLC30A10/WNK4/DRD2/PSEN2/MRLN/STK39/NOS1/TRPC3/THY1/NKAIN4/IL16/HECW1/EGF/RGS7/VMP1/HFE/P2RX7/FGF14/B2M/RGS4/TMC1/HECW2/STAC/UTRN/PLCG2/PTPN3/FCRL3/TMC2/CACNB4/ADCYAP1R1/CD84/SLC30A1/EPPIN/NETO2/AKAP9/TRDN/FXYD5/PKP2/OPRK1/ALG10B/CACNA1D/TREM2/TF
GOCC_ENDOPLASMIC_RETICULUM_LUMEN	GOCC_ENDOPLASMIC_RETICULUM_LUMEN	GOCC_ENDOPLASMIC_RETICULUM_LUMEN	124	0.25551	1.76965	0.00144826	0.0250107	0.0210072	1729	tags=35%, list=21%, signal=28%	TIMP1/F5/STC2/ERAP1/COL9A1/MFGE8/GPX8/COL25A1/SPP1/COL15A1/COL4A2/APOB/COL24A1/WNT4/COL6A3/COL22A1/B2M/BMP4/FN1/COL4A6/C3/RCN1/COL13A1/LTBP1/TNC/PDGFC/COL4A1/MGAT4A/COL1A1/MTTP/FGF23/DNAJC3/COL21A1/FKBP10/TRDN/COL17A1/UGGT2/SPON1/TF/CLU/COL12A1/MXRA8/MATN3
GOBP_CIRCULATORY_SYSTEM_DEVELOPMENT	GOBP_CIRCULATORY_SYSTEM_DEVELOPMENT	GOBP_CIRCULATORY_SYSTEM_DEVELOPMENT	464	0.205203	1.76925	5.02e-06	0.000274572	0.000230621	1528	tags=28%, list=18%, signal=25%	HDAC9/PDPN/DYNC2H1/FGF2/SALL1/NDNF/DDAH1/RARB/HOXA1/NGFR/FLRT3/ERAP1/ALOX5/FZD2/MFGE8/PDLIM3/PITX2/SIX1/MEF2A/TGFBI/DNAH5/ACTA2/MINAR1/COL15A1/ISL1/PGF/SLIT3/COL4A2/CYP1B1/THY1/APOB/KCNJ8/PAX6/HEXIM1/CASP7/S1PR1/C5/WNT4/EGF/ANTXR1/MDM2/AIMP1/POU4F2/PDE3B/PLK2/SMAD3/NTRK3/HOPX/SGCD/EPHA2/FREM2/COL22A1/FUT1/VAV3/RGS4/HPSE/BMP4/POPDC3/FN1/C3/IGF1/ADAMTS9/ITGAX/SPINK5/NTRK2/ADTRP/CFLAR/SCUBE1/ERBB4/V…
MCBRYAN_PUBERTAL_BREAST_4_5WK_UP	MCBRYAN_PUBERTAL_BREAST_4_5WK_UP	MCBRYAN_PUBERTAL_BREAST_4_5WK_UP	115	0.259183	1.76923	0.00211856	0.0324925	0.0272914	1773	tags=38%, list=21%, signal=31%	TIMP1/TRPS1/STC2/COL9A1/MFGE8/BOC/SPP1/ACTA2/BECN1/TLCD4/ARHGEF3/PAWR/OCLN/RIPOR2/FOXA1/ABCC3/PLK2/BTN1A1/MANSC1/FN1/DSP/PRLR/GDPD1/TNC/ESRP1/PERP/DKK3/IRF6/GRHL2/PLAT/KLF5/PLPP2/ERBB3/CHI3L1/RUNX1/CDH11/NPR3/SPON1/RAB7B/SESN3/FIP1L1/ID4/ELF5/PALLD
GOBP_REGULATION_OF_IMMUNE_RESPONSE	GOBP_REGULATION_OF_IMMUNE_RESPONSE	GOBP_REGULATION_OF_IMMUNE_RESPONSE	274	0.216588	1.76907	0.000210441	0.00576876	0.00484534	1736	tags=31%, list=21%, signal=26%	BTN2A2/STAT6/ERAP1/PAK3/BTN3A1/ITGAM/TRIM21/DRD2/BTN3A2/CNR1/THY1/HEXIM1/PAWR/SPN/C5/SUSD4/HHLA2/DHX58/HFE/BTN3A3/PLK2/MAPK10/P2RX7/SMAD3/BTN1A1/COLEC12/SELENOS/VAV3/USP29/B2M/F2RL1/HLA-B/TRIM5/PLSCR1/TREML4/CD36/MASP1/C3/SKAP1/SPINK5/SERPINB9/PLCG2/VTCN1/ADORA2B/INPP5D/FCRL3/CD200R1/C7/CD38/OAS3/LACC1/NLRC5/CYLD/CD84/MICA/PYHIN1/HLA-DMB/DDX60/TRIM56/CD160/PTPN2/SLC15A2/LTA/BTN2A3P/C8A/LCK/MICB/A…
GOBP_MONOCARBOXYLIC_ACID_TRANSPORT	GOBP_MONOCARBOXYLIC_ACID_TRANSPORT	GOBP_MONOCARBOXYLIC_ACID_TRANSPORT	38	0.342593	1.7688	0.01008	0.0909548	0.0763954	913	tags=32%, list=11%, signal=28%	ABCB4/DRD2/NOS2/ABCC3/P2RX7/PLA2R1/CD36/PRKAA1/SLCO1A2/SLC16A14/SLC6A12/SLC6A13
HP_CONGENITAL_MALFORMATION_OF_THE_RIGHT_HEART	HP_CONGENITAL_MALFORMATION_OF_THE_RIGHT_HEART	HP_CONGENITAL_MALFORMATION_OF_THE_RIGHT_HEART	31	0.364411	1.76849	0.0101582	0.0913563	0.0767327	1523	tags=39%, list=18%, signal=32%	DNAH5/SPEF2/HLA-B/MMP2/CFAP221/DNAH9/SPAG1/DNAAF4/SEMA3E/EIF2AK3/DNAH11/DRC1
WU_CELL_MIGRATION	WU_CELL_MIGRATION	WU_CELL_MIGRATION	66	0.292259	1.7655	0.00739817	0.0747674	0.0627992	1321	tags=35%, list=16%, signal=30%	FGF2/TGFBI/TXNIP/DYNLT3/COL4A2/SMURF2/LAMA3/EPB41L2/F2RL1/EFEMP1/DTX4/FN1/PLIN2/TRIM29/ESRP1/PDGFC/PERP/DKK3/COL4A1/KLF5/KYNU/PPL/NMU
GOBP_IMMUNE_RESPONSE_REGULATING_CELL_SURFACE_RECEPTOR_SIGNALING_PATHWAY	GOBP_IMMUNE_RESPONSE_REGULATING_CELL_SURFACE_RECEPTOR_SIGNALING_PATHWAY	GOBP_IMMUNE_RESPONSE_REGULATING_CELL_SURFACE_RECEPTOR_SIGNALING_PATHWAY	83	0.27782	1.76149	0.00336958	0.0444948	0.0373724	2388	tags=43%, list=29%, signal=31%	BTN2A2/PAK3/BTN3A1/BTN3A2/THY1/PAWR/HHLA2/BTN3A3/MAPK10/BTN1A1/VAV3/PLSCR1/SKAP1/PLCG2/VTCN1/INPP5D/FCRL3/CD200R1/CD38/CD160/PTPN2/BTN2A3P/LCK/MICB/KLHL6/NFKBIZ/APPL1/CD47/MEF2C/SOS1/PTPRC/ITK/FOXP1/YES1/HLA-DPB1/PDE4D
HALLMARK_UV_RESPONSE_DN	HALLMARK_UV_RESPONSE_DN	HALLMARK_UV_RESPONSE_DN	67	0.290842	1.76025	0.00447048	0.0534591	0.0449018	2806	tags=54%, list=34%, signal=36%	DDAH1/SYNJ2/FZD2/ICA1/NR3C1/CACNA1A/SMAD3/RGS4/EFEMP1/ADORA2B/LTBP1/MET/COL1A1/CAP2/TFPI/NRP1/ANXA2/PDLIM5/RUNX1/KCNMA1/PTPRM/NEK7/PLCB4/NOTCH2/MAGI2/NR1D2/SDC2/PTEN/COL1A2/LAMC1/CDK13/SPOP/ATRX/TJP1/FBLN5/GCNT1
NIKOLSKY_BREAST_CANCER_17Q21_Q25_AMPLICON	NIKOLSKY_BREAST_CANCER_17Q21_Q25_AMPLICON	NIKOLSKY_BREAST_CANCER_17Q21_Q25_AMPLICON	171	0.237193	1.75989	0.00119722	0.0218726	0.0183714	1416	tags=29%, list=17%, signal=25%	PPM1D/HLF/TOB1/NGFR/TEX14/CDK5RAP3/CA4/RPS6KB1/CCDC47/DGKE/SKA2/LUC7L3/MMD/CA10/TLK2/TOM1L1/SPAG9/SMURF2/VMP1/COIL/PCTP/ABCC3/ANKFN1/ZNF652/RGS9/RAD51C/SKAP1/CEP95/PPP1R27/RNF43/PTRH2/CD300E/MPO/MED13/CBX1/RNFT1/GDPD1/GNA13/DHX40/PNPO/COL1A1/ABCA8/EME1/UTP18/PECAM1/USP32/STXBP4/CLTC/CALCOCO2/DDX5
GOBP_ERK1_AND_ERK2_CASCADE	GOBP_ERK1_AND_ERK2_CASCADE	GOBP_ERK1_AND_ERK2_CASCADE	112	0.258464	1.75435	0.00244882	0.0358332	0.0300973	2153	tags=42%, list=26%, signal=32%	BTN2A2/FGF2/SLC30A10/DRD2/ACTA2/RPS6KA6/EGF/GCNT2/RAP1B/NTRK3/EPHA2/PKHD1/F2RL1/BMP4/CD36/FN1/IGF1/NTRK2/CFLAR/ERBB4/EGFR/ALKAL1/PDGFC/STYX/FGF1/FGF23/PTPN2/FBXW7/NRP1/GPNMB/CHI3L1/OPRM1/NDRG4/EPHA4/CSF1R/TREM2/TF/CD74/CNKSR3/NOTCH2/PDE8A/ATF3/GAREM1/CX3CL1/PTEN/MAP3K12/PTPRC
BROWNE_HCMV_INFECTION_6HR_DN	BROWNE_HCMV_INFECTION_6HR_DN	BROWNE_HCMV_INFECTION_6HR_DN	59	0.304288	1.75319	0.00635819	0.0675085	0.0567023	958	tags=27%, list=11%, signal=24%	HDAC9/FGF2/GSAP/ICA1/TXNIP/TLE4/NR3C1/S1PR1/MDM2/COIL/SMAD3/F2RL1/CFLAR/DSP/ADORA2B/PNISR
GOBP_INTERLEUKIN_6_PRODUCTION	GOBP_INTERLEUKIN_6_PRODUCTION	GOBP_INTERLEUKIN_6_PRODUCTION	55	0.308143	1.75084	0.00991883	0.0903357	0.0758754	2145	tags=47%, list=26%, signal=35%	ISL1/IL16/NOS2/P2RX7/SELENOS/F2RL1/HLA-B/CEBPB/CD36/IL1RAP/PLCG2/ADORA2B/INPP5D/CD200R1/AIF1/CD84/STAT3/TREM2/RAB7B/PTAFR/CD74/CD47/HGF/INAVA/CX3CL1/NLRX1
LIM_MAMMARY_LUMINAL_MATURE_DN	LIM_MAMMARY_LUMINAL_MATURE_DN	LIM_MAMMARY_LUMINAL_MATURE_DN	41	0.330409	1.74687	0.0077445	0.0772168	0.0648565	1018	tags=34%, list=12%, signal=30%	MERTK/KCTD12/B4GALT6/SORBS1/FAS/TLE4/COL4A2/FRMD4A/EPB41L2/NTRK2/SLC6A15/EGFR/HEY2/COL4A1
LEE_TARGETS_OF_PTCH1_AND_SUFU_DN	LEE_TARGETS_OF_PTCH1_AND_SUFU_DN	LEE_TARGETS_OF_PTCH1_AND_SUFU_DN	40	0.330201	1.7468	0.00802283	0.0791905	0.0665143	1807	tags=38%, list=22%, signal=30%	ABLIM1/CALB1/DYNLT3/TRPC3/THY1/ELMOD1/NRIP3/MASP1/KIF5A/GRIA1/SEMA3E/NDRG4/PREPL/ALDH1L1/NTM
GOMF_SIGNALING_RECEPTOR_REGULATOR_ACTIVITY	GOMF_SIGNALING_RECEPTOR_REGULATOR_ACTIVITY	GOMF_SIGNALING_RECEPTOR_REGULATOR_ACTIVITY	109	0.259347	1.74079	0.00225503	0.0338013	0.0283907	1457	tags=31%, list=17%, signal=26%	FGF2/TIMP1/KITLG/STC2/FLRT3/DPP4/SPP1/PGF/HDGFL3/C5/IL16/WNT4/EGF/AIMP1/FGF14/GREM2/EFEMP1/CMTM8/BMP4/NAMPT/IGF1/INHBE/WNT8A/PDGFC/TNFSF15/DKK3/FGF1/FGF23/GPNMB/SEMA5A/LTA/TRH/SEMA3E/IL19
ODONNELL_TFRC_TARGETS_UP	ODONNELL_TFRC_TARGETS_UP	ODONNELL_TFRC_TARGETS_UP	148	0.239918	1.73959	0.00154166	0.0262058	0.0220109	1582	tags=31%, list=19%, signal=26%	MACROH2A2/CMBL/PAPPA/ALOX5/SIX1/ITGAM/GPR85/FAS/TXNIP/LMO2/ZMAT3/PTGER3/ABAT/SESN1/TSC22D3/C3orf52/PRKAA2/CA10/CDC42EP3/SV2C/ABCC3/PLK2/TP53INP1/CACNA1A/PRKG2/FAXDC2/PPIC/TPPP2/CHIC1/SAMD4A/MYH14/TENT5C/PYHIN1/SYT17/MALAT1/KRAS/KLF10/TFPI/ENPP2/STXBP6/LILRB3/S100A7A/IGFN1/TRIM22/PTAFR/LINC00520
GOBP_POSITIVE_REGULATION_OF_DEFENSE_RESPONSE	GOBP_POSITIVE_REGULATION_OF_DEFENSE_RESPONSE	GOBP_POSITIVE_REGULATION_OF_DEFENSE_RESPONSE	91	0.270216	1.73771	0.00623602	0.0669877	0.0562649	1736	tags=35%, list=21%, signal=28%	SNCA/CAMK2N1/PAK3/CNR1/PTGER3/HEXIM1/IL16/USP29/F2RL1/TRIM5/PLSCR1/CEBPB/C3/PLCG2/ADORA2B/NLRC5/TNFRSF1A/PYHIN1/PDE2A/TRIM56/CD160/LTA/C2CD4B/MGST2/TREM2/NLRP1/PARP9/CLNK/IFI16/NFKBIZ/PGC/CD47
WP_MESODERMAL_COMMITMENT_PATHWAY	WP_MESODERMAL_COMMITMENT_PATHWAY	WP_MESODERMAL_COMMITMENT_PATHWAY	55	0.305651	1.73668	0.0104648	0.0932616	0.078333	1103	tags=29%, list=13%, signal=25%	DDAH1/RARB/TRIM71/PITX2/TRERF1/SESN1/PAX6/FOXA1/SMAD3/VAV3/TRIM5/AEBP2/BMP4/ASCC3/GRHL2/KLF5
GOBP_BLOOD_VESSEL_MORPHOGENESIS	GOBP_BLOOD_VESSEL_MORPHOGENESIS	GOBP_BLOOD_VESSEL_MORPHOGENESIS	251	0.218669	1.73528	0.00018526	0.00519687	0.00436499	1418	tags=29%, list=17%, signal=25%	HDAC9/FGF2/NDNF/DDAH1/HOXA1/NGFR/ERAP1/ALOX5/MFGE8/SIX1/TGFBI/MINAR1/COL15A1/ISL1/PGF/COL4A2/CYP1B1/THY1/APOB/S1PR1/C5/WNT4/EGF/AIMP1/PDE3B/PLK2/SGCD/EPHA2/COL22A1/FUT1/VAV3/HPSE/BMP4/FN1/C3/ADAMTS9/ITGAX/SPINK5/NTRK2/ADTRP/VEZF1/STAB2/MMP2/GNA13/HEY2/QKI/COL4A1/ADAM12/FGF1/KLF5/CD160/NPR1/CDH13/PRRX1/ENPP2/FBXW7/FKBP10/PLCD3/NRP1/STAT3/GPNMB/SEMA5A/GJC1/ANXA2/CHI3L1/PIK3CB/ELK3/RUNX1/YJEFN3/CD34…
GOBP_EXTERNAL_ENCAPSULATING_STRUCTURE_ORGANIZATION	GOBP_EXTERNAL_ENCAPSULATING_STRUCTURE_ORGANIZATION	GOBP_EXTERNAL_ENCAPSULATING_STRUCTURE_ORGANIZATION	121	0.251347	1.73425	0.0029269	0.0405274	0.0340401	1659	tags=34%, list=20%, signal=28%	PDPN/NDNF/PRDM5/COL9A1/DPP4/TGFBI/COL15A1/COL4A2/CYP1B1/COL24A1/ANTXR1/ABI3BP/SMAD3/ST7/COL22A1/COL4A6/ADAMTS9/SPINK5/ADTRP/CFLAR/COL13A1/MMP2/RB1/RXFP1/CCDC80/TNFRSF1A/WDR72/COL4A1/COL1A1/NID2/FKBP10/MYH11/HPSE2/HMCN1/COL17A1/RUNX1/ADAMTSL3/TLL1/ADAMTS17/ADAMTS20/COL12A1
GOBP_RESPONSE_TO_BACTERIUM	GOBP_RESPONSE_TO_BACTERIUM	GOBP_RESPONSE_TO_BACTERIUM	187	0.22694	1.73329	0.000902936	0.0176162	0.0147963	1717	tags=34%, list=21%, signal=27%	SNCA/PPM1D/TENT5A/IL12RB2/ERAP1/TMEM255A/RPS6KB1/CNR1/NOS1/SLC22A5/APOB/KCNJ8/CCDC186/SPN/NOS2/DHX58/P2RX7/EPHA2/COLEC12/SELENOS/B2M/F2RL1/HLA-B/TRIM5/CEBPB/CD36/SCN7A/C3/ADAMTS9/SPINK5/MPO/PLCG2/TMF1/CPS1/PRLR/STAB2/IL22RA1/LITAF/KMO/IKZF3/OAS3/CCDC80/MICA/TNFRSF1A/CD160/MRC1/EPPIN/CDC73/LTA/TRDN/OPRK1/HMCN1/OPRM1/TREM2/NLRP1/TF/CA3/PTAFR/TRIB1/KLHL6/STAB1/CXCL3/PGC
JINESH_BLEBBISHIELD_TRANSFORMED_STEM_CELL_SPHERES_UP	JINESH_BLEBBISHIELD_TRANSFORMED_STEM_CELL_SPHERES_UP	JINESH_BLEBBISHIELD_TRANSFORMED_STEM_CELL_SPHERES_UP	60	0.296671	1.73302	0.00664617	0.0696658	0.0585142	2364	tags=48%, list=28%, signal=35%	ABLIM1/ICA1/SPP1/TXNIP/TMEM106B/CYP1B1/SPTSSA/MLPH/SMAD3/AKR1B10/ADGRF1/F2RL1/CABYR/CEACAM6/TRIM31/RAB22A/KYNU/ANXA2/KLHL5/NDRG4/AP1S2/PPP1CB/UBE2Q2/FBXO32/SMIM14/MFSD6/NIBAN1/CYP3A5/CCPG1
MEBARKI_HCC_PROGENITOR_WNT_UP	MEBARKI_HCC_PROGENITOR_WNT_UP	MEBARKI_HCC_PROGENITOR_WNT_UP	75	0.276804	1.73223	0.00431308	0.0526517	0.0442236	1467	tags=35%, list=18%, signal=29%	PDLIM3/PITX2/ENDOD1/TCHH/TGFBI/PPP2R2C/ARHGEF3/CYP1B1/MMD/BNC2/SCG5/DNM3/FN1/RNF43/FLG-AS1/MMP2/CCDC80/SH3GL3/ACTN1/COL1A1/ADAM12/FRMD5/HMCN1/STXBP6/NDRG4/CSF1R
KRIGE_RESPONSE_TO_TOSEDOSTAT_24HR_UP	KRIGE_RESPONSE_TO_TOSEDOSTAT_24HR_UP	KRIGE_RESPONSE_TO_TOSEDOSTAT_24HR_UP	316	0.207778	1.73127	0.000171968	0.0049261	0.00413757	2998	tags=49%, list=36%, signal=33%	HDAC9/ITPR2/STC2/ERAP1/ALOX5/SERPINB6/SIPA1L2/ME1/MEF2A/MOSMO/TXNIP/DYNLT3/TRIQK/RAB3IP/STK39/LIN7A/SETD7/TUBE1/TSC22D3/ADRB1/ARHGAP30/ZNF652/PTBP3/MANSC1/PLSCR1/PCMTD1/CEBPB/NAMPT/GKAP1/INPP1/TMEM154/SKIL/SGTB/UTRN/PLIN2/TRIM38/NBR1/RCN1/PSIP1/SAMD9L/H2BC19P/ZBTB41/LACC1/CYLD/TCEA3/MINDY2/KLF10/ARID4A/CAST/BIN2/GOLGA2/ZRSR2/NRP1/FOSL2/CHI3L1/KLHL5/IFT80/UGGT2/RAB8B/CSGALNACT2/PTER/TAP1/PMAIP1/TR…
GOBP_INORGANIC_ANION_TRANSPORT	GOBP_INORGANIC_ANION_TRANSPORT	GOBP_INORGANIC_ANION_TRANSPORT	82	0.27212	1.73081	0.00544365	0.0612085	0.0514107	2175	tags=44%, list=26%, signal=33%	ANO5/ABCB1/GLRA1/WNK4/SLC26A4/TTYH1/ABCC3/SLC4A7/PRKG2/CEBPB/GRM5/BEST3/SLC4A5/BSND/SLC4A1/SLC34A1/SLC22A8/CLIC5/CFTR/FGF23/SLC26A7/GABRB2/SLC12A1/SLC6A1/GABRB1/ABCC4/PTAFR/SLC26A8/ANO4/BEST4/SLC5A5/SLC1A1/GLRA3/SLC13A1/CA2/ANO3
GOBP_SPROUTING_ANGIOGENESIS	GOBP_SPROUTING_ANGIOGENESIS	GOBP_SPROUTING_ANGIOGENESIS	61	0.294391	1.73078	0.00985734	0.0902443	0.0757987	1406	tags=31%, list=17%, signal=26%	HDAC9/FGF2/NGFR/ALOX5/PGF/PLK2/EPHA2/FUT1/BMP4/ADAMTS9/ADTRP/FGF1/CDH13/FBXW7/NRP1/SEMA5A/PIK3CB/YJEFN3/SEMA3E
GOBP_NEGATIVE_REGULATION_OF_SECRETION	GOBP_NEGATIVE_REGULATION_OF_SECRETION	GOBP_NEGATIVE_REGULATION_OF_SECRETION	69	0.281561	1.72794	0.00659719	0.0692864	0.0581956	1742	tags=39%, list=21%, signal=31%	SNCA/WNK4/DRD2/CNR1/PTGER3/STK39/ABAT/EGF/FRMD4A/RAP1B/PLA2R1/SYTL4/ADTRP/CD84/TNFRSF1A/SLC30A1/RAB33B/FGF23/ERBB3/OPRK1/TRH/STXBP6/OPRM1/REST/CD74/FMR1/NDUFAF2
NABA_ECM_REGULATORS	NABA_ECM_REGULATORS	NABA_ECM_REGULATORS	69	0.281488	1.72749	0.00659719	0.0692864	0.0581956	2009	tags=41%, list=24%, signal=31%	TIMP1/PAPPA/ADAM23/SERPINE2/SERPINB6/SERPINI2/NGLY1/HPSE/MASP1/ADAMTS9/SERPINB9/MMP2/ADAM12/PLAT/ADAM32/HPSE2/PLOD2/CPAMD8/A2M/A2ML1/ADAMTSL3/TLL1/ADAMTS17/ADAMTS20/F13A1/ADAM22/ADAMTS14/PRSS3
DER_IFN_BETA_RESPONSE_UP	DER_IFN_BETA_RESPONSE_UP	DER_IFN_BETA_RESPONSE_UP	49	0.31159	1.72526	0.0109669	0.0959976	0.0806311	1614	tags=35%, list=19%, signal=28%	LIPA/IFIT5/TRIM21/PSMB8/B2M/HLA-C/PLSCR1/PSMB9/DNAJC2/EIF2AK2/PLOD2/TAP1/BCLAF1/TRIM22/PMAIP1/IQGAP1/IFI16
MIYAGAWA_TARGETS_OF_EWSR1_ETS_FUSIONS_UP	MIYAGAWA_TARGETS_OF_EWSR1_ETS_FUSIONS_UP	MIYAGAWA_TARGETS_OF_EWSR1_ETS_FUSIONS_UP	115	0.252195	1.72153	0.00331182	0.0440004	0.0369572	590	tags=19%, list=7%, signal=18%	MAP7D3/MLLT3/FAT3/PTPN13/SLC35F2/NGFR/KCTD12/HHIP/SIX1/DPP4/HSD17B2/ITGAM/FAS/TNNT1/PGF/TSC22D3/PRSS35/STEAP2/P2RX7/AKR1B10/EPHA2/ADCY4
SATO_SILENCED_BY_METHYLATION_IN_PANCREATIC_CANCER_1	SATO_SILENCED_BY_METHYLATION_IN_PANCREATIC_CANCER_1	SATO_SILENCED_BY_METHYLATION_IN_PANCREATIC_CANCER_1	142	0.241744	1.71978	0.00174165	0.0286605	0.0240728	1539	tags=30%, list=18%, signal=25%	GLDC/SALL1/IFIT5/QPCT/HOXA1/NGFR/SYNJ2/B4GALT6/TNNT1/PGF/CDH8/CYP1B1/PAX6/WNT4/SUSD4/COL6A3/DHX58/ABCC3/CACNA1A/SMAD3/PSMB8/USP29/HLA-B/EFEMP1/ARNTL2/COL4A6/C3/ANKRD26/LHX6/RGS17/SLC4A1/PROCR/PDE2A/PLAT/COL21A1/NETO2/CHI3L1/OPRK1/RAB6A/LCK/SPON1/PMAIP1/KLHL11
ONDER_CDH1_TARGETS_1_UP	ONDER_CDH1_TARGETS_1_UP	ONDER_CDH1_TARGETS_1_UP	69	0.280053	1.71868	0.00741613	0.0748387	0.0628591	1944	tags=39%, list=23%, signal=30%	STC2/CYP4F3/TXNIP/ZMAT3/CYP1B1/TSC22D3/HCP5/MDM2/BTN3A3/AKR1B10/FBN2/IL1RAP/LHX6/EGFR/INPP5D/CEP152/GOLGA2/PRSS16/KCNMA1/BHLHE41/KDELR3/LINC00115/N4BP2L2/ATF3/PDE4DIP/ZMYM2/SENP6
GOCC_ACTIN_BASED_CELL_PROJECTION	GOCC_ACTIN_BASED_CELL_PROJECTION	GOCC_ACTIN_BASED_CELL_PROJECTION	91	0.267069	1.71747	0.00690245	0.0715213	0.0600727	906	tags=25%, list=11%, signal=23%	PDPN/GAP43/HOMER2/KITLG/PCDH15/CALB1/ACTA2/PKHD1L1/SHTN1/MAP2/SPN/ANTXR1/MYO6/RIPOR2/FOXA1/TTYH1/SLC4A7/CD302/TMC1/MYO3A/UTRN/TMC2/OSBPL3
GOBP_REGULATION_OF_OSSIFICATION	GOBP_REGULATION_OF_OSSIFICATION	GOBP_REGULATION_OF_OSSIFICATION	40	0.324635	1.71735	0.00984934	0.0902443	0.0757987	1136	tags=32%, list=14%, signal=28%	TENT5A/ALOX5/BMPR1B/S1PR1/WNT4/P2RX7/SMAD3/FBN2/BMP4/RUNX2/NBR1/FGF23/TXLNG
GOBP_SECOND_MESSENGER_MEDIATED_SIGNALING	GOBP_SECOND_MESSENGER_MEDIATED_SIGNALING	GOBP_SECOND_MESSENGER_MEDIATED_SIGNALING	99	0.262708	1.71718	0.00540912	0.0608836	0.0511378	1486	tags=33%, list=18%, signal=28%	NDNF/DDAH1/HOMER2/ITPR2/GNAI1/NOS1/NOS2/PDE3B/P2RX7/SGCD/GLP1R/CD36/GRM5/IGF1/PRKAA1/RCAN3/PLCG2/EGFR/ADORA2B/ADCYAP1R1/MAPT/PDE2A/GUCY1A2/GRIN2B/CAP2/NPR1/CDH13/ADGRG6/ERBB3/NCALD/EPHA5/EIF2AK3/TREM2
GOBP_CELLULAR_RESPONSE_TO_INORGANIC_SUBSTANCE	GOBP_CELLULAR_RESPONSE_TO_INORGANIC_SUBSTANCE	GOBP_CELLULAR_RESPONSE_TO_INORGANIC_SUBSTANCE	85	0.267982	1.71374	0.00312432	0.0422877	0.0355186	1733	tags=36%, list=21%, signal=29%	SNCA/GLRA1/CPNE8/SLC30A10/MYOG/MEF2A/SYT13/CPNE2/BECN1/KCNH1/PRKAA2/HFE/SYT5/B2M/RASGRP2/CFLAR/PRKAA1/PLCG2/EGFR/SLC34A1/SYT17/BLM/RYR3/ADCY10/EIF2AK3/TF/IQGAP1/CPNE4/NEK7/FMR1/NFE2L2
GOBP_ANION_TRANSPORT	GOBP_ANION_TRANSPORT	GOBP_ANION_TRANSPORT	200	0.223208	1.71046	0.00102498	0.0194274	0.0163176	1245	tags=26%, list=15%, signal=23%	ANO5/SNCA/PDPN/ABCB1/GLRA1/ABCB4/SLCO5A1/CA4/WNK4/DRD2/SLC9A9/ABAT/SLC26A4/NOS2/TTYH1/ABCC3/P2RX7/PLA2R1/SLC24A2/SLC9A7/RGS4/SLC4A7/SLC22A7/PRKG2/CEBPB/CD36/GRM5/NTRK2/PRKAA1/SLC6A15/SLCO1A2/BEST3/SLC16A14/SLC4A5/BSND/SLC4A1/SLC6A12/SLC6A13/KMO/SLC34A1/CYB5R4/SLC22A8/CLIC5/MTTP/CFTR/FGF23/SLC26A7/GABRB2/SLC12A1/SLC6A1/GABRB1/SLC22A14
GOCC_PLASMA_MEMBRANE_PROTEIN_COMPLEX	GOCC_PLASMA_MEMBRANE_PROTEIN_COMPLEX	GOCC_PLASMA_MEMBRANE_PROTEIN_COMPLEX	229	0.216567	1.70759	0.000614948	0.0131076	0.0110094	1492	tags=31%, list=18%, signal=26%	CTNNA2/TRBV4-2/ITGA1/TRBV4-1/CDH18/TRBV7-2/ITGAM/SORBS1/FAS/SCN3A/KCNA4/TRBV3-1/GNAI1/PSEN2/BMPR1B/LIN7A/CDH8/KCNJ8/KCNH1/C5/LIN7C/HFE/ITGBL1/GNG2/CACNA1A/SGCD/B2M/HLA-B/HLA-C/SCN2A/SCN7A/SKAP1/ITGA11/IGF1/ITGAX/GFRA1/CFLAR/UTRN/TRBV7-4/VWC2/EGFR/COL13A1/SGCZ/C7/CACNB4/ATP1A4/GNA13/PGM5/KCNQ3/HLA-DMB/GRIN2B/ATP1B4/CDH13/KCNS3/GNG3/GRIN3A/GJC1/ANXA2/AKAP9/ERBB3/GRIA1/CDH11/CLTC/C8A/KCNMA1/GNB4/KCN…
GOBP_CELL_FATE_COMMITMENT	GOBP_CELL_FATE_COMMITMENT	GOBP_CELL_FATE_COMMITMENT	84	0.266513	1.70198	0.00822492	0.0801612	0.0673296	1270	tags=29%, list=15%, signal=24%	PDPN/FGF2/GAP43/STAT6/MYOG/SIX1/ISL1/PAX6/SPN/WNT4/FOXA1/NTRK3/BARHL2/BMP4/ERBB4/RUNX2/WNT8A/ESRP1/HEY2/PRRX1/NRP1/CDC73/STAT3/POU3F2
RODWELL_AGING_KIDNEY_UP	RODWELL_AGING_KIDNEY_UP	RODWELL_AGING_KIDNEY_UP	216	0.218693	1.70065	0.000883096	0.0174174	0.0146294	1736	tags=31%, list=21%, signal=25%	SNCA/TIMP1/ITGA1/QPCT/SERPINE2/SYTL2/STAT6/PARP12/DOCK2/ALOX5/MFGE8/GPX8/TGFBI/FAS/KLF8/ZMAT3/COL15A1/SETD7/DRAM1/ANTXR1/BTN3A3/GNG2/PSMB8/ARHGAP30/HLA-B/ABRACL/FN1/DOCK11/GFRA1/RUNX2/VTCN1/PSMB9/C7/CHI3L2/SAMD9L/TNC/SVEP1/CD38/LACC1/NLRC5/DKK3/ACTN1/COL1A1/MRC1/TFPI/GPNMB/ANXA2/PRICKLE1/FXYD5/SLFN5/SPTLC3/CDH11/RAB8B/GNB4/A2M/CSF1R/TAP1/SPON1/BHLHE41/TRIM22/RASSF5/ADGRE2/NFKBIZ/STAB1/TMPRSS4/DTX…
REN_ALVEOLAR_RHABDOMYOSARCOMA_DN	REN_ALVEOLAR_RHABDOMYOSARCOMA_DN	REN_ALVEOLAR_RHABDOMYOSARCOMA_DN	187	0.222648	1.70051	0.00135774	0.0238663	0.0200459	1384	tags=26%, list=17%, signal=22%	FGF2/TIMP1/PTPN13/SNX7/QPCT/SERPINE2/STAT6/FZD2/MFGE8/ENDOD1/TGFBI/DYNLT3/STK39/CHMP2B/DRAM1/SKAP2/SPAG9/SMURF2/ITGBL1/PAPSS2/RAP1B/SMAD3/RAB21/EFEMP1/PPIC/FN1/NUCB2/TMED5/EGFR/MMP2/PDGFC/OSBPL3/TNFRSF1A/ARF4/ACTN1/COL1A1/PLAT/SNX2/CASP4/RAI14/CAST/FKBP10/NRP1/EDIL3/ANXA2/PDLIM5/FXYD5/ELK3/ELL2
GRAESSMANN_RESPONSE_TO_MC_AND_SERUM_DEPRIVATION_UP	GRAESSMANN_RESPONSE_TO_MC_AND_SERUM_DEPRIVATION_UP	GRAESSMANN_RESPONSE_TO_MC_AND_SERUM_DEPRIVATION_UP	76	0.271895	1.70007	0.00941891	0.0875433	0.07353	1067	tags=26%, list=13%, signal=23%	LIPA/PARP12/KCTD12/COL9A1/BOC/TRIM21/FAS/TXNIP/MMD/CASP7/EGF/ABI3BP/TP53INP1/DNM3/TRIM5/C3/DKK3/EIF2AK2/DDX60/GRHL2
GROSS_HYPOXIA_VIA_ELK3_DN	GROSS_HYPOXIA_VIA_ELK3_DN	GROSS_HYPOXIA_VIA_ELK3_DN	58	0.294019	1.6973	0.0111471	0.0972605	0.0816918	2932	tags=59%, list=35%, signal=38%	TRPS1/ACBD3/CDC42EP3/SIAH2/PLK2/PTBP3/PRKG2/CEBPB/C3/SKIL/KIF5A/TNC/ATF1/ACAP2/PDLIM5/NEDD9/IFI16/GADD45A/CXCL3/ALDH1L2/DZIP3/ERO1A/PFKFB3/ANPEP/PNRC1/LAMP2/RBPJ/RPS6KA5/IL13RA1/ACSL4/RIOK1/CTH/SCAF11/TXNL1
PEDERSEN_METASTASIS_BY_ERBB2_ISOFORM_4	PEDERSEN_METASTASIS_BY_ERBB2_ISOFORM_4	PEDERSEN_METASTASIS_BY_ERBB2_ISOFORM_4	40	0.320771	1.69691	0.0112439	0.0978347	0.082174	1659	tags=40%, list=20%, signal=32%	TIMP1/PTPN13/SYT13/PTGER3/CYP1B1/CGNL1/ABCC3/FREM2/FN1/GFRA1/ADORA2B/NECAB1/CLVS1/ELL2/CROT/COL12A1
REACTOME_EXTRACELLULAR_MATRIX_ORGANIZATION	REACTOME_EXTRACELLULAR_MATRIX_ORGANIZATION	REACTOME_EXTRACELLULAR_MATRIX_ORGANIZATION	135	0.240677	1.69348	0.00291089	0.0403969	0.0339305	1482	tags=33%, list=18%, signal=28%	FGF2/TIMP1/ITGA1/COL9A1/PCOLCE2/ITGAM/COL25A1/SPP1/COL15A1/COL4A2/COL24A1/SCUBE3/COL6A3/LAMA3/COL22A1/ACAN/EFEMP1/KLK2/FBN2/BMP4/FN1/COL4A6/ITGA11/ADAMTS9/ITGAX/SCUBE1/COL13A1/MMP2/LTBP1/CEACAM6/TNC/MUSK/COL4A1/ACTN1/COL1A1/ADAM12/CAST/NID2/COL21A1/PECAM1/PLOD2/COL17A1/A2M/LAMA4/TLL1
GOBP_POSITIVE_REGULATION_OF_LOCOMOTION	GOBP_POSITIVE_REGULATION_OF_LOCOMOTION	GOBP_POSITIVE_REGULATION_OF_LOCOMOTION	217	0.217674	1.69265	0.000741768	0.0153977	0.012933	1915	tags=35%, list=23%, signal=28%	HDAC9/PDPN/FGF2/KITLG/RPS6KB1/PAK3/ACTA2/PGF/STK39/CYP1B1/SHTN1/THY1/SPN/S1PR1/IL16/EGF/SPAG9/SMURF2/RIPOR2/GCNT2/PLK2/SMAD3/NTRK3/EPHA2/FUT1/F2RL1/BMP4/FN1/SH3RF2/IGF1/ITGAX/RRAS2/PLCG2/EGFR/MMP2/CEACAM6/LYVE1/PDGFC/MET/KIF20B/AIF1/COL1A1/FGF1/MALAT1/CDH13/RELN/ENPP2/NRP1/STAT3/GPNMB/SEMA5A/PECAM1/OPRK1/PIK3CB/TACR3/CCAR1/SEMA3E/EPHA4/CSF1R/CAMK1D/TREM2/NEDD9/BVES/TF/PTAFR/PDCD10/CBLL1/CD74/NFE2…
GOBP_INFLAMMATORY_RESPONSE	GOBP_INFLAMMATORY_RESPONSE	GOBP_INFLAMMATORY_RESPONSE	207	0.218337	1.68879	0.00191227	0.030585	0.0256892	1877	tags=34%, list=22%, signal=27%	SNCA/HDAC9/LIPA/TIMP1/ALOX5/CAMK2N1/SPP1/BMPR1B/ISL1/CNR1/PTGER3/STK39/FNDC4/C5/IL16/NOS2/AIMP1/PLK2/P2RX7/SMAD3/EPHA2/SELENOS/F2RL1/PLSCR1/CEBPB/CD36/IL1RAP/FN1/C3/IGF1/SCUBE1/PLCG2/ADORA2B/RB1/CD200R1/AIF1/LACC1/CYLD/TNFRSF1A/PDE2A/CASP4/PTPN2/UFL1/STAT3/LTA/C2CD4B/MGST2/CHI3L1/OPRM1/A2M/PLD4/CSF1R/CAMK1D/TREM2/NLRP1/PTAFR/ADGRE2/IFI16/NFKBIZ/CAMK4/STAB1/APPL1/PJA2/CXCL3/NFE2L2/CD47/ESR1/NOTCH2…
GOBP_TISSUE_REMODELING	GOBP_TISSUE_REMODELING	GOBP_TISSUE_REMODELING	60	0.288847	1.68732	0.00912127	0.0856592	0.0719476	1529	tags=37%, list=18%, signal=30%	LIPA/TIMP1/SNX10/SPP1/PDK4/S1PR1/SUCO/MDM2/P2RX7/EPHA2/MC4R/MMP2/INPP5D/CD38/TMBIM1/GPNMB/ZNF675/LRRK1/RUNX1/PPARGC1B/CSF1R/TF
WANG_CLIM2_TARGETS_DN	WANG_CLIM2_TARGETS_DN	WANG_CLIM2_TARGETS_DN	66	0.279202	1.68662	0.0100614	0.0908632	0.0763185	3894	tags=71%, list=47%, signal=38%	FAS/LIN7A/ACBD3/TSC22D3/BLZF1/COIL/RNFT1/GALNT7/TIPRL/GNA13/WHAMM/SCML2/SPAG1/ETNK1/REST/NEK7/DPM1/PHF11/SREK1IP1/SP100/PRPF40A/PFDN4/KPNA5/MYNN/SRRM1/C5orf51/RPP30/RBM48/CHMP5/TOPORS/CAPZA2/SEC23A/PGM3/RCHY1/STXBP3/TATDN1/BTBD10/ZNF91/IFRD1/IRF9/STRN3/SERINC3/ITM2B/ATG12/HINT3/MRPS11/DHX36
SMID_BREAST_CANCER_BASAL_DN	SMID_BREAST_CANCER_BASAL_DN	SMID_BREAST_CANCER_BASAL_DN	297	0.205938	1.68559	0.000242499	0.00639951	0.00537513	1316	tags=25%, list=16%, signal=22%	KIF5C/NELL2/REPS2/ABCB1/PNPLA4/ALCAM/STC2/SYTL2/TOB1/TNIK/TRIM68/FLRT3/CAMK2N1/SIX1/GREB1/ICA1/TNNT1/GALNT10/RGS5/BMPR1B/SLIT3/CNR1/PTGER3/NFIA/STK39/ABAT/LIN7A/C3orf52/MLPH/SNCG/TOM1L1/MYO6/ABCC3/ITGBL1/CYBRD1/MAN1A1/ZNF652/BCAS1/VAV3/SLC4A7/BMP4/PLIN1/FAXDC2/CD36/COL4A6/IGF1/NUCB2/GFRA1/NTRK2/ERBB4/PRLR/CEACAM6/GALNT7/ABCA12/KMO/TESMIN/SVEP1/SNPH/MAPT/ADH1B/SYT17/PLAT/MUC6/CCDC170/ABCA8/PIEZO2/…
LEE_RECENT_THYMIC_EMIGRANT	LEE_RECENT_THYMIC_EMIGRANT	LEE_RECENT_THYMIC_EMIGRANT	102	0.252847	1.68315	0.00628449	0.067308	0.0565339	2082	tags=43%, list=25%, signal=33%	SYTL2/TOB1/FAM126A/GNAI1/FAM241A/SKAP2/RBM7/PGM2/RNF138/CHML/VAV3/PLSCR1/AEBP2/RAB18/CHI3L2/DSG2/AIF1/OTUD6B/SENP7/MINDY2/MYSM1/N4BP2/SIKE1/OXR1/PCGF5/IFT80/GNB4/ANKRD55/LYPLA1/FUT8/IFI16/NFKBIZ/CAMK4/ARL5A/ZC3H8/ZNF720/ZNF738/VPS13C/ZBTB21/MBTD1/P2RX5/LCORL/MTHFD2L/XIAP
WP_PI3KAKT_SIGNALING_PATHWAY	WP_PI3KAKT_SIGNALING_PATHWAY	WP_PI3KAKT_SIGNALING_PATHWAY	141	0.235876	1.6776	0.00453706	0.0536771	0.0450849	1467	tags=31%, list=18%, signal=26%	FGF2/ITGA1/KITLG/NGFR/COL9A1/RPS6KB1/SPP1/PPP2R2C/IL2RG/PGF/COL4A2/PRKAA2/PKN2/EGF/MDM2/COL6A3/LAMA3/GNG2/FGF14/EPHA2/FN1/COL4A6/ITGA11/IGF1/NTRK2/PRKAA1/PRLR/EGFR/TNC/PDGFC/MET/COL4A1/COL1A1/FGF1/SGK2/FGF23/KRAS/RELN/GNG3/PIK3CB/PPP2R2A/GNB4/LAMA4/CSF1R
SWEET_LUNG_CANCER_KRAS_DN	SWEET_LUNG_CANCER_KRAS_DN	SWEET_LUNG_CANCER_KRAS_DN	145	0.233921	1.67608	0.00478648	0.0555499	0.0466579	1377	tags=27%, list=16%, signal=23%	SNCA/ABLIM1/CYP2S1/KITLG/TPH1/KCTD12/SORBS1/FAS/ACTA2/LMO2/ARHGEF3/SESN1/MYO6/RIPOR2/PGM2/GNG2/PAPSS2/HOPX/GREM2/SCN7A/C3/CYTH3/SLC4A5/RCN1/COL13A1/PSIP1/LYVE1/QKI/MAPT/ADH1B/TENT5C/COL1A1/TFPI/ENPP2/LIFR/MYH11/EPHA5/CDH11/NPR3
WP_FOCAL_ADHESION_PI3KAKTMTORSIGNALING_PATHWAY	WP_FOCAL_ADHESION_PI3KAKTMTORSIGNALING_PATHWAY	WP_FOCAL_ADHESION_PI3KAKTMTORSIGNALING_PATHWAY	130	0.235927	1.66575	0.0045183	0.0535482	0.0449766	1210	tags=28%, list=14%, signal=24%	FGF2/KITLG/NGFR/RPS6KB1/SPP1/PPP2R2C/IL2RG/PGF/COL4A2/NOS1/PRKAA2/EGF/NOS2/MDM2/FOXA1/LAMA3/GNG2/FGF14/EPHA2/FN1/COL4A6/ITGA11/IGF1/ITGAX/PRKAA1/PRLR/EGFR/TNC/PDGFC/MET/COL4A1/COL1A1/FGF1/KRAS/RELN/GNG3
PICCALUGA_ANGIOIMMUNOBLASTIC_LYMPHOMA_DN	PICCALUGA_ANGIOIMMUNOBLASTIC_LYMPHOMA_DN	PICCALUGA_ANGIOIMMUNOBLASTIC_LYMPHOMA_DN	66	0.275658	1.66521	0.0105956	0.0938866	0.078858	3712	tags=73%, list=44%, signal=41%	TOB1/TSC22D3/SUCO/SMURF2/NAMPT/SBDS/CCDC59/SLC30A1/MGAT4A/KLF10/FBXW7/FOSL2/CSGALNACT2/ETNK1/PMAIP1/SRSF5/GADD45A/TSPYL2/COG3/ZBTB10/JMY/FOXP1/HAUS3/EIF4E/IKZF5/STK17B/PDE4D/WIPF1/RGCC/CNOT6L/RSRC2/LINC-PINT/PNPLA8/PTP4A2/CHD1/DUSP10/RNF11/ZFC3H1/CLK1/ATP2B1-AS1/CCNL1/EIF1/IFRD1/MXD1/HIPK1/DDX3X/ZFAND5/IRF2BP2
ZWANG_CLASS_3_TRANSIENTLY_INDUCED_BY_EGF	ZWANG_CLASS_3_TRANSIENTLY_INDUCED_BY_EGF	ZWANG_CLASS_3_TRANSIENTLY_INDUCED_BY_EGF	90	0.258971	1.66311	0.00906885	0.0854635	0.0717832	1974	tags=36%, list=24%, signal=27%	NCOA7/HOXA1/TOB1/DPP4/MOSMO/LMO7/C3orf52/VMP1/BLZF1/FOXA1/PLK2/EPHA2/F2RL1/IL1RAP/ADAMTS9/PROS1/GALNT7/VGLL3/VTRNA1-3/ARL5B/FOSL2/RUNX1/ELL2/EIF2AK3/FRMD4B/TRIB1/NFKBIZ/ITGA2/ATF3/PPTC7/PDP1/CEMIP2
GOCC_MEMBRANE_MICRODOMAIN	GOCC_MEMBRANE_MICRODOMAIN	GOCC_MEMBRANE_MICRODOMAIN	138	0.23301	1.66259	0.00864862	0.0828736	0.0696079	1528	tags=30%, list=18%, signal=25%	PDPN/ITGA1/ABCB4/STAT6/SYNJ2/DPP4/ITGAM/SORBS1/FAS/PSEN2/CNR1/NOS1/THY1/S1PR1/SMURF2/RGS7/RAP1B/HPSE/PLSCR1/CD36/SKAP1/ADTRP/CFLAR/EGFR/INPP5D/ADCYAP1R1/ATP1A4/SLC34A1/MAPT/TNFRSF1A/PLPP2/TFPI/CDH13/PECAM1/ANXA2/KCNMA1/OPRM1/LCK/SLC6A2/MAL2/TREM2/BVES
GOBP_TRANSMEMBRANE_RECEPTOR_PROTEIN_TYROSINE_KINASE_SIGNALING_PATHWAY	GOBP_TRANSMEMBRANE_RECEPTOR_PROTEIN_TYROSINE_KINASE_SIGNALING_PATHWAY	GOBP_TRANSMEMBRANE_RECEPTOR_PROTEIN_TYROSINE_KINASE_SIGNALING_PATHWAY	251	0.209445	1.66207	0.000606391	0.0129763	0.0108991	1555	tags=28%, list=19%, signal=24%	SNCA/FGF2/REPS2/ITGA1/TRIM71/MERTK/NGFR/STAT6/FLRT3/SLC30A10/HHIP/RPS6KB1/PAK3/SORBS1/EPHA6/TXNIP/PDK4/PGF/COL4A2/GRB14/WNT4/EGF/NTRK3/SH3TC2/EPHA2/EFEMP1/NAMPT/COL4A6/IGF1/GKAP1/GFRA1/NTRK2/PRKAA1/ERBB4/RUNX2/PRLR/EGFR/PTPN3/MMP2/PDGFC/MET/MUSK/SVEP1/COL4A1/COL1A1/PLAT/FGF1/FGF23/SH2D6/PTPN2/FRK/CDH13/EFNB3/SHOC2/FBXW7/NRP1/STAT3/ERBB3/PIK3CB/EPHA5/STXBP4/XDH/LCK/EIF2AK3/NDRG4/EPHA4/CSF1R/NEDD9/…
GOBP_CYTOSOLIC_CALCIUM_ION_TRANSPORT	GOBP_CYTOSOLIC_CALCIUM_ION_TRANSPORT	GOBP_CYTOSOLIC_CALCIUM_ION_TRANSPORT	66	0.274521	1.65834	0.0107737	0.0948903	0.079701	2557	tags=47%, list=31%, signal=33%	SNCA/FGF2/ITPR2/DRD2/PSEN2/NOS1/TRPC3/THY1/TRPA1/P2RX7/SLC24A2/PLCG2/ADCYAP1R1/GRIN2B/RYR3/TRDN/LCK/GP5/TRPV3/P2RX5/MICU2/MCOLN3/ATP1A2/CX3CL1/PTPRC/ERO1A/TRPV6/PDE4D/MICU3/TRPM2/CCR7
JAATINEN_HEMATOPOIETIC_STEM_CELL_UP	JAATINEN_HEMATOPOIETIC_STEM_CELL_UP	JAATINEN_HEMATOPOIETIC_STEM_CELL_UP	140	0.231634	1.65228	0.00397172	0.0496603	0.041711	1842	tags=34%, list=22%, signal=27%	LRCH2/MLLT3/DDAH1/HLF/NEGR1/B4GALT6/SCN3A/SLC25A27/WDR49/GNAI1/FAM171B/HDGFL3/CRISPLD1/COL24A1/PPM1H/BEND4/SLC9A7/VAV3/F2RL1/TCEAL9/RUNX2/SLC16A14/RCN1/DPY19L2/PREX2/GALNT7/PDGFC/DSG2/CMAHP/SLITRK4/ZNF618/TFPI/ADGRG6/MAST4/PDE1A/MAP9/NPR3/ALG10B/CD34/QSER1/HSH2D/FRMD4B/TAF1D/HOXB3/CNKSR3/PLCB4/SPIN4/SCN9A
GOBP_EPIDERMIS_DEVELOPMENT	GOBP_EPIDERMIS_DEVELOPMENT	GOBP_EPIDERMIS_DEVELOPMENT	104	0.246089	1.65188	0.00808649	0.0795282	0.0667979	2060	tags=41%, list=25%, signal=32%	MACROH2A2/NGFR/PITX2/TCHH/EDA2R/OVOL1/TXNIP/EXPH5/PAX6/MYO6/LAMA3/EPHA2/SLC4A7/HPSE/BMP4/TMC1/SPINK5/DSP/EGFR/ABCA12/KRT10/ESRP1/SVEP1/HEY2/IRF6/GRHL2/CNFN/MYSM1/POU3F2/PPL/FOSL2/COL17A1/FLG/FLG2/LHFPL5/PALLD/SGPP1/GRHL3/SOS1/LGR4/MCOLN3/AP3B1/KAZN
GOCC_EXTERNAL_ENCAPSULATING_STRUCTURE	GOCC_EXTERNAL_ENCAPSULATING_STRUCTURE	GOCC_EXTERNAL_ENCAPSULATING_STRUCTURE	206	0.213941	1.65147	0.00189545	0.030525	0.0256388	1583	tags=32%, list=19%, signal=27%	NDNF/TIMP1/SERPINE2/FCGBP/FLRT3/COL9A1/SERPINB6/MFGE8/TGFBI/COL25A1/OTOGL/PKHD1L1/COL15A1/COL4A2/MUC4/COL24A1/ZAN/WNT4/COL6A3/LAMA3/ABI3BP/COLEC12/FREM2/COL22A1/ACAN/EFEMP1/HPSE/PLSCR1/FBN2/FN1/COL4A6/ADAMTS9/SERPINB9/VWC2/COL13A1/MMP2/LTBP1/INHBE/WNT8A/TNC/CCDC80/FREM3/COL4A1/COL1A1/PLAT/FGF1/MUC6/CDH13/NID2/RELN/COL21A1/HAPLN3/EDIL3/ANXA2/HPSE2/CHI3L1/HMCN1/COL17A1/A2M/LAMA4/FLG/ADAMTSL3/SPON1/…
GOBP_ADAPTIVE_IMMUNE_RESPONSE	GOBP_ADAPTIVE_IMMUNE_RESPONSE	GOBP_ADAPTIVE_IMMUNE_RESPONSE	135	0.234704	1.65146	0.00462	0.0542574	0.0455723	2354	tags=40%, list=28%, signal=29%	TRBV4-2/TRBV4-1/ALCAM/STAT6/TRBV7-2/ERAP1/BTN3A1/BTN3A2/TRBV3-1/SPN/C5/SUSD4/HFE/BTN3A3/P2RX7/B2M/HLA-B/HLA-C/C3/SKAP1/TRBV7-4/VTCN1/INPP5D/C7/CD84/MICA/HLA-DMB/CD160/STAT3/LTA/LILRB3/C8A/MICB/TREM2/TAP1/CLU/KLHL6/NFKBIZ/CAMK4/CD74/RAPGEF4/CD274/MEF2C/ERAP2/HLA-DOA/HLA-DPA1/PTPRC/TRGV9/ITK/HPX/EXOSC3/HLA-DPB1/TNFSF13B/RELB
GOBP_ANATOMICAL_STRUCTURE_HOMEOSTASIS	GOBP_ANATOMICAL_STRUCTURE_HOMEOSTASIS	GOBP_ANATOMICAL_STRUCTURE_HOMEOSTASIS	127	0.237883	1.65134	0.00764973	0.0765384	0.0642867	1467	tags=31%, list=18%, signal=26%	NELL2/LIPA/HOMER2/SNX10/PCDH15/CALB1/SPP1/PDK4/CNR1/STK39/SLC22A5/CHMP2B/MUC4/S1PR1/OCLN/GCNT2/P2RX7/B2M/CCDC66/PRKAA1/MC4R/CLDN12/BBS10/SGCZ/INPP5D/RB1/ABCA12/SLC28A2/CD38/MUC6/KRAS/PECAM1/ZNF675/LRRK1/ILDR2/CD34/SLC6A2/PPARGC1B/CSF1R
GOBP_NEGATIVE_REGULATION_OF_MULTICELLULAR_ORGANISMAL_PROCESS	GOBP_NEGATIVE_REGULATION_OF_MULTICELLULAR_ORGANISMAL_PROCESS	GOBP_NEGATIVE_REGULATION_OF_MULTICELLULAR_ORGANISMAL_PROCESS	382	0.195549	1.65122	0.000127776	0.00389734	0.00327349	1706	tags=29%, list=20%, signal=24%	HDAC9/BTN2A2/FGF2/TIMP1/GLRA1/HOMER2/RARB/STC2/MERTK/SERPINE2/NGFR/ALOX5/WNK4/DRD2/TNNT1/SPP1/MINAR1/PTGER3/STK39/COL4A2/ABAT/THY1/RPS6KA6/PAX6/MAP2/CD2AP/ADRB1/WNT4/FOXA1/POU4F2/PCTP/DHX58/HFE/PDE3B/PLK2/P2RX7/SMAD3/NTRK3/EPHA2/SELENOS/B2M/F2RL1/RGS4/IL17RD/EFEMP1/BMP4/DAAM2/FN1/IGF1/ADAMTS9/SPINK5/ADTRP/PROS1/EGFR/ADORA2B/MMP2/INPP5D/RB1/CD200R1/EAF2/FRZB/PIBF1/PROCR/CD38/OAS3/HEY2/CYLD/CD84/TN…
WELCSH_BRCA1_TARGETS_UP	WELCSH_BRCA1_TARGETS_UP	WELCSH_BRCA1_TARGETS_UP	97	0.25388	1.65118	0.00645163	0.0681762	0.0572631	3842	tags=68%, list=46%, signal=37%	LIPA/ITGA1/QPCT/ALCAM/HMMR/MFGE8/SCAMP1/ACTA2/GNAI1/H1-0/NR3C1/LAMA3/B2M/TSNAX/PPIC/NPEPPS/TRAM1/ENPP2/TMED2/ANXA2/RAB6A/MICB/IQGAP1/SRSF5/COPS2/ID4/CD47/AGPS/GUCY1B1/MEF2C/LIMS1/GET1/RDX/KIF2A/MAP4K5/PRKAR1A/TCEAL1/SSR1/RABGGTB/ZNF148/ZNF267/ATP6V0A1/RAB2A/CXADR/DR1/DEK/ANXA4/SEC23A/FOXD1/CDKN1A/SUCLG1/JAK1/NDUFA12/KIF5B/TXNDC9/PBX3/PCBD1/KIFAP3/TAF12/DDX3X/ADD3/SERINC3/EXOC5/ZNF711/CCNG2/EPCAM
GOBP_CELL_CELL_ADHESION	GOBP_CELL_CELL_ADHESION	GOBP_CELL_CELL_ADHESION	366	0.194954	1.64586	0.000366892	0.00888748	0.00746484	1409	tags=25%, list=17%, signal=22%	PDPN/PCDH19/BTN2A2/CTNNA2/ITGA1/FAT3/ALCAM/SERPINE2/NECTIN4/NEGR1/CDH18/FLRT3/ALOX5/BOC/PCDH15/DPP4/ITGAM/ABAT/CDH8/CYP1B1/THY1/TENM3/PAWR/SPN/FAT2/MAGI1/CD2AP/NECTIN3/ZAN/WNT4/RIPOR2/VMP1/FOXA1/TTYH1/GCNT2/HHLA2/LAMA3/HFE/SPTA1/PKHD1/B2M/HSPH1/DCHS2/BMP4/CEBPB/IL1RAP/FN1/CNTN4/SKAP1/ITGA11/IGF1/ITGAX/MPZ/ADTRP/DSP/CSRP1/VTCN1/EGFR/TRIM29/COL13A1/CLDN12/SELL/CEACAM6/CD200R1/ABCA12/PERP/DSG2/AIF1/…
HP_DECREASED_FERTILITY	HP_DECREASED_FERTILITY	HP_DECREASED_FERTILITY	100	0.249268	1.64407	0.00626825	0.0672006	0.0564436	1783	tags=36%, list=21%, signal=29%	NDNF/TEX14/FLRT3/DNAH5/DDX3Y/NR3C1/DNAH8/DNAH10/SPEF2/PWRN1/DNAH2/HFE/IL17RD/RAD51C/PLIN1/PRLR/CFAP70/CFTR/CFAP221/DNAH9/SPAG1/BTG4/PSMC3IP/BLM/LHCGR/FSIP2/DNAAF4/TACR3/SEMA3E/MNS1/DNAH11/DRC1/BRCA1/DCC/SLC26A8/CFAP65
SCHAEFFER_PROSTATE_DEVELOPMENT_48HR_UP	SCHAEFFER_PROSTATE_DEVELOPMENT_48HR_UP	SCHAEFFER_PROSTATE_DEVELOPMENT_48HR_UP	160	0.226137	1.64214	0.00329246	0.0438508	0.0368315	2723	tags=48%, list=33%, signal=33%	HDAC9/PTPN13/KCTD12/PCOLCE2/HHIP/ENDOD1/CALB1/DDX3Y/DENND2D/RAB3IP/CDH8/CYP1B1/COL24A1/TSC22D3/SPTSSA/SKAP2/WNT4/FOXA1/BEND4/ZBTB8B/HOPX/DCDC2/HLA-B/EFEMP1/PLSCR1/NAMPT/COL4A6/MASP1/CYTH3/SPINK5/PROS1/EAF2/GDPD1/PDGFC/ADH1B/SP6/TMC7/LRRK1/ABCC4/RIPPLY3/CLU/CYP7B1/CROT/CAMK4/GPX2/CPM/C5orf15/RAB5C/OTULINL/SMOC1/ISCU/TRPV6/KRT15/RCSD1/PIAS1/SMAGP/CLDN4/FAM3C/COL4A5/KRT7/MANBA/SYNPR/CA14/COLGALT2/PL…
BROWNE_HCMV_INFECTION_18HR_UP	BROWNE_HCMV_INFECTION_18HR_UP	BROWNE_HCMV_INFECTION_18HR_UP	75	0.262402	1.64211	0.0075795	0.0760619	0.0638865	3491	tags=61%, list=42%, signal=36%	GAP43/RUNDC3B/ENPP4/PAK3/MINAR1/SPTSSA/PRKAA2/CD2AP/COIL/ST7/MED13/PTPN3/MET/KIF3A/SH3GL3/RO60/KCNS3/CDC27/ERBB3/GOSR2/TAP1/SEC23IP/TERF1/SEC24A/MAN2A2/TGDS/FXR1/RSBN1/CYP19A1/MORC3/RPP30/PPP3R1/PPP1R2/PARP2/CXADR/KHDC4/MAGOH/CDC5L/MYOZ3/MITF/LYN/RETREG1/HELZ/FNBP1L/PEG3/SPAST
GOCC_CYTOPLASMIC_REGION	GOCC_CYTOPLASMIC_REGION	GOCC_CYTOPLASMIC_REGION	113	0.240079	1.63642	0.00871705	0.0830882	0.0697881	2048	tags=36%, list=25%, signal=28%	KIF5C/DYNC2H1/ERC2/RIMS1/DNAH5/GNAI1/DNAH8/DNAH14/DNAH10/MAP2/DNAH6/DNAH2/RAB21/DCDC2/KIF5A/SPAG6/KIF3A/ABHD13/DNAH7/MAPT/CFAP70/CFAP221/DNAH9/CFAP54/OPRM1/MNS1/CCDC113/DNAH11/DRC1/CCSAP/BBS7/FMR1/ARL6/SEPTIN7/GUCY1B1/LCA5/SPTBN5/BLOC1S6/AP3B1/CFAP43/RPGRIP1L
GOBP_MUSCLE_TISSUE_DEVELOPMENT	GOBP_MUSCLE_TISSUE_DEVELOPMENT	GOBP_MUSCLE_TISSUE_DEVELOPMENT	153	0.225129	1.63304	0.00435987	0.0529418	0.0444673	1528	tags=29%, list=18%, signal=24%	HDAC9/FGF2/HLF/RARB/MYOG/SIX1/MEF2A/RPS6KB1/ISL1/S1PR1/RIPOR2/SMAD3/HOPX/SGCD/RGS4/BMP4/CHRND/POPDC3/IGF1/ADAMTS9/CFLAR/PRKAA1/ERBB4/DSP/CSRP1/SGCZ/RB1/WNT8A/DSG2/PGM5/HEY2/NEB/MYH14/KLF5/MYH11/GJC1/PDLIM5/ERBB3/PKP2/RUNX1/DDX5/NDRG4/EYA1/VAMP5/BVES
HALLMARK_MYOGENESIS	HALLMARK_MYOGENESIS	HALLMARK_MYOGENESIS	85	0.255008	1.63078	0.00682952	0.0711058	0.0597237	1289	tags=31%, list=15%, signal=26%	ABLIM1/FGF2/STC2/MYOG/MEF2A/SORBS1/TNNT1/COL15A1/PSEN2/COL4A2/NOS1/KCNH1/COL6A3/SGCD/CD36/IGF1/RB1/MYH3/TNNC2/COL1A1/ADAM12/KLF5/ENO3/CDH13/MYH11/ERBB3
DELYS_THYROID_CANCER_UP	DELYS_THYROID_CANCER_UP	DELYS_THYROID_CANCER_UP	189	0.212818	1.6278	0.00413931	0.0510698	0.0428949	1516	tags=30%, list=18%, signal=25%	NELL2/TIMP1/QPCT/ALOX5/MFGE8/ENDOD1/DPP4/FAS/PCSK2/SPP1/CYP1B1/SCG5/MAP2/MYO6/ABCC3/EPHA2/DTX4/MYEF2/IL1RAP/FN1/C3/STAC/PROS1/PLIN2/DSP/MED13/TRIM29/COL13A1/CEACAM6/CHI3L2/TNC/MET/HEY2/SAMD4A/TNFSF15/TNFRSF1A/KCNQ3/COL1A1/ADAM12/FGF1/PLPP2/MRC1/ATP10B/SLC6A1/PPL/ANXA2/ERBB3/FXYD5/CHI3L1/NMU/RUNX1/EPHA4/CSF1R/TREM2/BMERB1/TRIM22/PMAIP1
GOBP_TUBE_DEVELOPMENT	GOBP_TUBE_DEVELOPMENT	GOBP_TUBE_DEVELOPMENT	426	0.190178	1.62565	0.000127687	0.00389734	0.00327349	1428	tags=25%, list=17%, signal=22%	HDAC9/PDPN/FGF2/SALL1/NDNF/LIPA/DDAH1/RARB/TRIM71/CCKBR/SERPINE2/HOXA1/NGFR/ERAP1/ALOX5/FZD2/MFGE8/HHIP/PITX2/SIX1/WNK4/TGFBI/CALB1/MINAR1/COL15A1/ISL1/PGF/COL4A2/CYP1B1/THY1/APOB/PAX6/S1PR1/C5/MAN1A2/WNT4/EGF/AIMP1/FOXA1/PDE3B/PLK2/SMAD3/HOPX/SGCD/EPHA2/PKHD1/COL22A1/FUT1/VAV3/HPSE/BMP4/FN1/C3/ADAMTS9/ITGAX/SPINK5/NTRK2/ADTRP/VEZF1/CPS1/EGFR/STAB2/MMP2/RB1/ABCA12/RGMA/PDGFC/MET/KIF20B/GNA13/RXFP…
YANG_BCL3_TARGETS_UP	YANG_BCL3_TARGETS_UP	YANG_BCL3_TARGETS_UP	133	0.231023	1.62242	0.00615503	0.0663811	0.0557554	1668	tags=32%, list=20%, signal=26%	TIMP1/MERTK/TNIK/TCEAL5/ENDOD1/CA4/ZNF385B/TGFBI/TNNT1/PDK4/CNR1/PTGER3/PGM2/DHX58/PSMB8/TRIM5/FAXDC2/MASP1/SPTLC1/PSMB9/ASCC3/KIF20B/EIF2AK2/IRF6/MYH3/CLMP/ELOVL6/PLAT/ENO3/ABCA8/NID2/NCALD/CKAP2/ELAVL2/GNB4/A2M/ETNK1/TAP1/DGKG/TF/CROT/IGSF10/BEX4
BENPORATH_ES_WITH_H3K27ME3	BENPORATH_ES_WITH_H3K27ME3	BENPORATH_ES_WITH_H3K27ME3	428	0.190202	1.62173	0.000174907	0.00498019	0.004183	1908	tags=33%, list=23%, signal=27%	LRCH2/REPS2/MLLT3/DDAH1/PAPPA/CNRIP1/SLCO5A1/STC2/HOXA1/NGFR/NEGR1/ANKRD18B/SLC30A10/CAMK2N1/FZD2/ANKRD18A/HHIP/PITX2/SIX1/GPR12/SLC25A27/COL25A1/PCSK2/OVOL1/ISL1/SLIT3/PTGER3/NFIA/COL24A1/RPS6KA6/PAX6/MLPH/KCNH1/CA10/SCUBE3/KLHL13/ADRB1/SLC26A4/SUSD4/ELMOD1/TTYH1/POU4F2/ABCC3/CACNA1A/COLEC12/ADCY4/ANKRD20A1/ANXA2R/VAV3/HLA-B/ACAN/NRIP3/HLA-C/HPSE/BARHL2/DCHS2/RGS9/FBN2/COL4A6/SKAP1/GKAP1/NTRK2/P…
MONNIER_POSTRADIATION_TUMOR_ESCAPE_DN	MONNIER_POSTRADIATION_TUMOR_ESCAPE_DN	MONNIER_POSTRADIATION_TUMOR_ESCAPE_DN	166	0.220653	1.61982	0.00400457	0.0498982	0.0419108	1800	tags=33%, list=22%, signal=26%	NDFIP2/TENT5A/HOXA1/SMIM10/FZD2/MFGE8/TMEM263/TRIM21/DYNLT3/H1-0/ZC2HC1A/TSC22D3/TARS3/SKAP2/SEC62/CDC42EP3/ZFAND6/GCNT2/COL6A3/CYBRD1/STEAP2/MIR4435-2HG/EPB41L2/CHML/TRIM5/POPDC3/CEP70/PPIC/PTRH2/SKIL/ABHD13/C5orf24/SGK2/MINDY2/KLF10/FRK/CAST/DNAJC3/PCGF5/PKP2/DSEL/PLAC1/UGP2/MZT1/CLU/SRSF5/NFKBIZ/COMMD6/APOOL/FBXL3/ZBTB10/KANSL1L/SPIN4/MOSPD2
RIGGI_EWING_SARCOMA_PROGENITOR_UP	RIGGI_EWING_SARCOMA_PROGENITOR_UP	RIGGI_EWING_SARCOMA_PROGENITOR_UP	193	0.211178	1.61786	0.00494838	0.0568801	0.0477752	1451	tags=28%, list=17%, signal=24%	NELL2/HDAC9/TRHDE/FAT3/PTPN13/SLC35F2/SLCO5A1/NGFR/FLRT3/ZCCHC12/TM6SF1/HSD17B2/ITGAM/TNNT1/PCSK2/SPP1/NR3C2/LMO2/RGS5/PGF/PTGER3/NOS1/PRSS35/C5/KLHL13/STEAP2/P2RX7/AKR1B10/CD36/IL1RAP/IGF1/SERPINB9/PARM1/PLCG2/TNC/FRZB/NT5DC1/KMO/MAPT/TNFSF15/SH3GL3/KBTBD8/MALAT1/FRK/RELN/COL21A1/SLC15A2/PCGF5/TRDN/HMCN1/CDH11/NPR3/EPHA4/A2M
GOBP_CELLULAR_ION_HOMEOSTASIS	GOBP_CELLULAR_ION_HOMEOSTASIS	GOBP_CELLULAR_ION_HOMEOSTASIS	217	0.208025	1.61761	0.00199245	0.0313495	0.0263313	1409	tags=26%, list=17%, signal=22%	SNCA/FGF2/ITPR2/STC2/CCKBR/SLC30A10/WNK4/GPR12/DRD2/CALB1/CCDC47/SLC9A9/TMEM106B/CNR1/PTGER3/NOS1/TRPC3/THY1/RIC3/TRPA1/S1PR1/HFE/CYBRD1/STEAP2/P2RX7/CACNA1A/SMAD3/PKHD1/SLC24A2/SLC9A7/F2RL1/GLP1R/SLC4A7/CD36/GRM5/PLCG2/SLC4A5/SLC4A1/ADCYAP1R1/ATP1A4/GNA13/TESMIN/SLC34A1/CD38/LACC1/SLC30A1/GRIN2B/CFTR/FGF23/GNG3/RYR3/TRDN/GRIA1/PIK3CB/KCNMA1/LCK
ACEVEDO_METHYLATED_IN_LIVER_CANCER_DN	ACEVEDO_METHYLATED_IN_LIVER_CANCER_DN	ACEVEDO_METHYLATED_IN_LIVER_CANCER_DN	261	0.200327	1.61693	0.00169028	0.0281574	0.0236502	2062	tags=38%, list=25%, signal=29%	KIF5C/SLCO5A1/SYTL2/COL9A1/SIPA1L2/DPP4/GPR12/CCDC47/EDA2R/PPP2R2C/EXPH5/BMPR1B/CNR1/GRB14/TRPC3/MUC4/COL24A1/MLPH/CCDC186/MUCL3/TDRD6/ASB5/FAT2/SLC26A4/OCLN/SPATA18/MDM2/RIPOR2/LPCAT2/CCSER1/ST6GALNAC3/UBE2D1/HMGN5/TSNAX/DCHS2/MAGEH1/GKAP1/GRAP2/PTPN3/FILIP1/GALNT7/LYVE1/ADCYAP1R1/TMEM229B/CCDC136/CCDC80/FGF1/TMEM170A/ADGB/ADAM5/DNAJC3/CDH13/GOLGA2/RNF17/FBXW7/DMKN/SUGT1/PDE1A/AK5/TM9SF3/MAP9/LT…
GOBP_RESPONSE_TO_METAL_ION	GOBP_RESPONSE_TO_METAL_ION	GOBP_RESPONSE_TO_METAL_ION	132	0.228986	1.61219	0.00706662	0.0729431	0.061267	1584	tags=33%, list=19%, signal=27%	SNCA/GLRA1/CPNE8/SLC30A10/MYOG/MEF2A/DRD2/SYT13/TXNIP/CPNE2/BECN1/ABAT/TRPC3/KCNH1/PRKAA2/HFE/CYBRD1/P2RX7/SYT5/B2M/RASGRP2/PLSCR1/SEC31A/PRKAA1/PLCG2/CPS1/EGFR/TESMIN/SLC34A1/MAPT/SLC30A1/ATF1/SYT17/MTTP/FGF23/SLC6A1/RYR3/KCNMA1/EIF2AK3/TF/IQGAP1/CPNE4/SLC30A4/NEK7
GOBP_ION_HOMEOSTASIS	GOBP_ION_HOMEOSTASIS	GOBP_ION_HOMEOSTASIS	274	0.197302	1.61154	0.00190307	0.0305733	0.0256793	1561	tags=27%, list=19%, signal=22%	SNCA/FGF2/SNX10/ITPR2/STC2/CCKBR/SLC30A10/WNK4/GPR12/DRD2/CALB1/CCDC47/PDK4/SLC9A9/TMEM106B/CNR1/PTGER3/STK39/NOS1/TRPC3/THY1/RIC3/TRPA1/S1PR1/SLC26A4/HFE/CYBRD1/STEAP2/P2RX7/CACNA1A/SMAD3/SGCD/PKHD1/SLC24A2/SLC9A7/B2M/F2RL1/GLP1R/SLC4A7/CD36/SCN7A/GRM5/PLCG2/SLC4A5/CPS1/PTPN3/SLC4A1/ADCYAP1R1/ATP1A4/GNA13/TESMIN/SLC34A1/CD38/LACC1/SLC30A1/GRIN2B/CFTR/FGF23/SLC12A1/NPR1/GNG3/CYP4F12/RYR3/TRDN/GRI…
GOBP_DIVALENT_INORGANIC_CATION_HOMEOSTASIS	GOBP_DIVALENT_INORGANIC_CATION_HOMEOSTASIS	GOBP_DIVALENT_INORGANIC_CATION_HOMEOSTASIS	160	0.221667	1.60967	0.00467581	0.0546399	0.0458935	1002	tags=21%, list=12%, signal=19%	SNCA/FGF2/SNX10/ITPR2/STC2/CCKBR/SLC30A10/GPR12/DRD2/CALB1/CCDC47/CNR1/PTGER3/NOS1/TRPC3/THY1/RIC3/TRPA1/S1PR1/P2RX7/CACNA1A/SMAD3/SGCD/PKHD1/SLC24A2/F2RL1/GLP1R/CD36/GRM5/PLCG2/ADCYAP1R1/GNA13/CD38/SLC30A1
GOBP_SENSORY_PERCEPTION	GOBP_SENSORY_PERCEPTION	GOBP_SENSORY_PERCEPTION	209	0.208674	1.60948	0.00303401	0.0414801	0.0348403	1492	tags=29%, list=18%, signal=24%	ABLIM1/GLRA1/HOMER2/USP53/SERPINE2/HOXA1/TMEM150C/SERPINB6/FZD2/PLCB2/RIMS1/SIX1/PCDH15/DRD2/TGFBI/OTOGL/PKHD1L1/CNR1/OTOF/PAX6/TRPA1/PHF24/SLC26A4/GPR179/OPN5/MYO6/RIPOR2/PGAP1/POU4F2/P2RX7/SLC24A2/DCDC2/B2M/EFEMP1/CCDC66/RGS9/CD36/TMC1/MYO3A/BBS10/OR4D1/TMC2/MYH14/CLIC5/COL1A1/OR2C3/GABRB2/PIEZO2/PKD1L3/OR2H2/GJC1/MARVELD2/OPRK1/HMCN1/OPRM1/TRPM3/KCNA2/CACNA1D/EYA1/SCN10A
GOBP_NERVOUS_SYSTEM_PROCESS	GOBP_NERVOUS_SYSTEM_PROCESS	GOBP_NERVOUS_SYSTEM_PROCESS	417	0.187485	1.60727	0.000311023	0.00774197	0.0065027	1495	tags=27%, list=18%, signal=23%	SNCA/ABLIM1/CTNNA2/GLRA1/HOMER2/USP53/SYNM/SERPINE2/HOXA1/TMEM150C/PTCHD1/CAMK2N1/SERPINB6/FZD2/PLCB2/RIMS1/SIX1/PCDH15/RPS6KB1/DRD2/TGFBI/TNNT1/SCN3A/CALB1/OTOGL/PKHD1L1/STX1B/CNR1/ABAT/CHMP2B/OTOF/PAX6/TRPA1/PHF24/S1PR1/SLC26A4/GPR179/OPN5/MYO6/RIPOR2/PGAP1/POU4F2/PLK2/P2RX7/ELAVL4/SLC24A2/ADGRF1/DCDC2/B2M/RGS4/GLP1R/EFEMP1/CCDC66/RGS9/SCN2A/CHRND/CEBPB/CD36/TMC1/SCN7A/GRM5/ITGAX/NTRK2/MYO3A/ST…
LEE_BMP2_TARGETS_UP	LEE_BMP2_TARGETS_UP	LEE_BMP2_TARGETS_UP	330	0.191758	1.60599	0.00131496	0.0232653	0.0195411	1219	tags=22%, list=15%, signal=20%	PDPN/REPS2/ABCB1/QPCT/ITPR2/F5/ALCAM/TRPS1/KLHL32/NGFR/RNF150/MFGE8/RIMS1/GREB1/DPP4/TNNT1/CALB1/SPP1/TXNIP/PDK4/LMO2/H1-0/LARP6/PTGER3/NFIA/GRB14/SETD7/SESN1/KCNJ8/CRISPLD1/MLPH/LIPG/RIPOR2/CGNL1/GNG2/P2RX7/TP53INP1/AKR1B10/MAN1A1/PSMB8/SYNPO2/ADCY4/RAB6B/VAV3/IL17RD/HLA-B/EFEMP1/DTX4/PLSCR1/SCN7A/NTRK2/DSP/PRLR/LTBP1/GDPD1/SMPDL3A/RGMA/ESRP1/DSG2/FMO2/PGM5/CCDC136/CCDC80/ADH1B/IRF6/PLAT/SLC26A7…
WANG_SMARCE1_TARGETS_DN	WANG_SMARCE1_TARGETS_DN	WANG_SMARCE1_TARGETS_DN	181	0.212409	1.60584	0.00564299	0.0625697	0.052554	1850	tags=33%, list=22%, signal=26%	FGF2/STC2/PARP12/PDLIM3/MEF2A/HSPA4L/DYNLT3/TLE4/TLCD4/CYP1B1/SHTN1/SMN1/CASP7/SMURF2/AIMP1/PLK2/ABI3BP/RNF138/MAN1A1/PSMB8/EPHA2/DLEU2/TRABD2A/RGS4/HLA-B/HSPH1/SLC4A7/HPSE/RRAS2/PRAME/PRR16/EGFR/PSMB9/GALNT7/UCHL5/OAS3/PNISR/MICA/ADAM12/ELOVL6/GUCY1A2/KYNU/SHOC2/PDLIM5/ZNF385D/GAR1/SLITRK5/LAMA4/TAP1/LYPLA1/TRIB1/FIP1L1/CFAP299/CXCL3/DCK/IDH3A/PLCB4/AFF3/MYBL1
GOBP_OSSIFICATION	GOBP_OSSIFICATION	GOBP_OSSIFICATION	158	0.221759	1.60416	0.00789555	0.0783725	0.0658273	1513	tags=28%, list=18%, signal=24%	FGF2/SNX10/TENT5A/TOB1/ALOX5/MYOG/CCDC47/SPP1/BMPR1B/S1PR1/SCUBE3/WNT4/SUCO/P2RX7/SMAD3/EPHA2/FBN2/BMP4/CEBPB/DNAJC13/ITGA11/IGF1/RRAS2/RUNX2/NBR1/EGFR/COL13A1/MMP2/TNC/SLC34A1/SBDS/COL1A1/FGF23/TXLNG/KLF10/UFL1/RUNX1/CDH11/CLTC/IFT80/DDX5/EIF2AK3/PPARGC1B/MIR548D1/REST
PILON_KLF1_TARGETS_UP	PILON_KLF1_TARGETS_UP	PILON_KLF1_TARGETS_UP	189	0.209558	1.60287	0.00510069	0.0581371	0.0488309	1721	tags=31%, list=21%, signal=25%	SNCA/REPS2/MLLT3/ALCAM/FAM126A/SLC30A10/CAMK2N1/ME1/DNAJB4/PTGER3/TLCD4/APOB/EIF5A2/MLPH/LIPG/C5/MDM2/ABCC3/MIER1/SPTA1/BTN1A1/AKR1B10/FBN2/TREML4/FN1/MASP1/TCEAL9/MED13/TMEM30A/STAB2/CYLD/SLC30A1/COL4A1/TENT5C/C2orf49/COL1A1/ADAM12/TLK1/MALAT1/ABCA8/CAP2/NID2/SHOC2/TMC7/FKBP10/N4BP2/RAB6A/ELL2/YPEL4/A2M/MZT1/ETNK1/TF/CLU/SRSF5/RNF157/C1GALT1/NAPG
DURCHDEWALD_SKIN_CARCINOGENESIS_DN	DURCHDEWALD_SKIN_CARCINOGENESIS_DN	DURCHDEWALD_SKIN_CARCINOGENESIS_DN	111	0.236092	1.60244	0.0109523	0.0959475	0.080589	1840	tags=32%, list=22%, signal=26%	PDPN/HOXA1/HMMR/FLRT3/SERPINB6/TGFBI/TMEM106B/CPNE2/LAMA3/PLK2/PTBP3/SLC4A7/HOOK1/UTRN/MED13/VGLL3/MET/QKI/EEA1/SNX9/ADAM12/RAB22A/CAST/CHI3L1/PIK3CB/RUNX1/ELL2/XDH/PMAIP1/UBL3/ATF7IP/PNCK/PTPN12/NFE2L2/AGPS/TWF1
SANSOM_APC_TARGETS_DN	SANSOM_APC_TARGETS_DN	SANSOM_APC_TARGETS_DN	144	0.22378	1.59883	0.00634091	0.0675085	0.0567023	1517	tags=28%, list=18%, signal=24%	NDFIP2/CMBL/LIPA/CYP2S1/MERTK/TOB1/FCGBP/TPH1/IL12RB2/CA4/GPR12/TGFBI/FAS/GALNT10/NFIA/MLPH/ABCC3/PAPSS2/AKR1B10/CD302/BMP4/ITGAX/SERPINB9/RUNX2/SLC4A5/PRLR/ADORA2B/INPP5D/MYH14/HLA-DMB/MTTP/CD160/TCEA3/OR2H2/MGST2/NPR3/XDH/MOGAT2/PLD4/TLL1/VAMP5
GOBP_TUBE_MORPHOGENESIS	GOBP_TUBE_MORPHOGENESIS	GOBP_TUBE_MORPHOGENESIS	352	0.189024	1.59587	0.00139714	0.024322	0.0204287	1428	tags=26%, list=17%, signal=23%	HDAC9/FGF2/SALL1/NDNF/DDAH1/TRIM71/HOXA1/NGFR/ERAP1/ALOX5/FZD2/MFGE8/HHIP/SIX1/WNK4/TGFBI/MINAR1/COL15A1/ISL1/PGF/COL4A2/CYP1B1/THY1/APOB/S1PR1/C5/WNT4/EGF/AIMP1/FOXA1/PDE3B/PLK2/SMAD3/SGCD/EPHA2/PKHD1/COL22A1/FUT1/VAV3/HPSE/BMP4/FN1/C3/ADAMTS9/ITGAX/SPINK5/NTRK2/ADTRP/VEZF1/EGFR/STAB2/MMP2/RGMA/MET/KIF20B/GNA13/HEY2/QKI/COL4A1/ADAM12/GRHL2/FGF1/KLF5/CD160/CEP290/KRAS/NPR1/CDH13/PRRX1/ENPP2/FBXW7…
GOMF_GATED_CHANNEL_ACTIVITY	GOMF_GATED_CHANNEL_ACTIVITY	GOMF_GATED_CHANNEL_ACTIVITY	131	0.226462	1.5958	0.00593185	0.064927	0.0545339	1520	tags=32%, list=18%, signal=27%	ANO5/GLRA1/ITPR2/TMEM150C/SCN3A/KCNN3/KCNA4/CNR1/KCNJ8/TRPA1/KCNH1/TTYH1/P2RX7/CACNA1A/SCN2A/CHRND/TMC1/SCN7A/NALCN/TMC2/CACNB4/KCNQ3/CLIC5/GRIN2B/CFTR/GABRB2/PIEZO2/KCNS3/TMC7/GABRB1/GRIN3A/RYR3/GRIA1/KCNMA1/OPRM1/KCNJ9/TRPM3/KCNA2/CACNA1D/SCN10A/TMC3/KCNH8
IVANOVA_HEMATOPOIESIS_MATURE_CELL	IVANOVA_HEMATOPOIESIS_MATURE_CELL	IVANOVA_HEMATOPOIESIS_MATURE_CELL	139	0.223515	1.59538	0.00898964	0.0851707	0.0715372	1396	tags=28%, list=17%, signal=24%	SNCA/FAM126A/SLC30A10/ENDOD1/TMEM255A/ITGAM/HSPA4L/ACTA2/NR3C1/TLCD4/ZBBX/EIF5A2/CDC42EP3/SPTA1/SH3TC2/COLEC12/RAD51C/C3/EGFR/STAB2/CCP110/SLC4A1/LYVE1/PAQR9/CMAHP/TENT5C/GTF2A1/COL1A1/CIR1/TRIM56/TMEM170A/ADGRL3/MRC1/MINDY2/CAST/USP32/PIK3CB/RAB6A/IFT80
GOBP_EPITHELIAL_CELL_DIFFERENTIATION	GOBP_EPITHELIAL_CELL_DIFFERENTIATION	GOBP_EPITHELIAL_CELL_DIFFERENTIATION	239	0.203046	1.59529	0.00225696	0.0338013	0.0283907	1305	tags=26%, list=16%, signal=22%	PDPN/MACROH2A2/FGF2/SALL1/RARB/FZD2/PITX2/SIX1/TCHH/OVOL1/TXNIP/ACTA2/EXPH5/COL15A1/PAX6/S1PR1/WNT4/MYO6/FOXA1/RAP1B/SMAD3/EPHA2/PKHD1/COL22A1/F2RL1/SLC4A7/HPSE/BMP4/CEBPB/TMC1/SPINK5/SCUBE1/ERBB4/SKIL/VEZF1/DSP/SLC4A5/CPS1/PRLR/CEP152/ABCA12/FRZB/KRT10/ESRP1/MET/HEY2/TNFRSF1A/IRF6/COL4A1/PDE2A/GRHL2/CNFN/RILPL2/FAT1/KLF5/ARID4A/NRP1/PECAM1/PPL/FOSL2/MARVELD2
GOBP_HEART_DEVELOPMENT	GOBP_HEART_DEVELOPMENT	GOBP_HEART_DEVELOPMENT	233	0.203092	1.59362	0.00383429	0.0486725	0.0408814	1528	tags=27%, list=18%, signal=23%	HDAC9/DYNC2H1/FGF2/SALL1/RARB/FLRT3/FZD2/PDLIM3/PITX2/SIX1/MEF2A/DNAH5/ISL1/SLIT3/KCNJ8/HEXIM1/CASP7/S1PR1/MDM2/POU4F2/SMAD3/NTRK3/HOPX/SGCD/FREM2/RGS4/BMP4/POPDC3/FN1/IGF1/ADAMTS9/SCUBE1/ERBB4/DSP/EGFR/MMP2/SGCZ/RB1/WNT8A/DSG2/HEY2/NEB/TNFRSF1A/PDE2A/GRHL2/ADGRG6/NRP1/MYH11/TMED2/GJC1/PDLIM5/ERBB3/PRICKLE1/PKP2/DNAAF4/RUNX1/TRIP11/NDRG4/DNAH11/RIPPLY3/EYA1/REST/DRC1/BVES
GOCC_SECRETORY_GRANULE	GOCC_SECRETORY_GRANULE	GOCC_SECRETORY_GRANULE	295	0.193629	1.58821	0.00144797	0.0250107	0.0210072	1589	tags=28%, list=19%, signal=23%	SNCA/TIMP1/ITGA1/SVIP/SNX10/QPCT/ITPR2/F5/SERPINE2/DOCK2/ALOX5/SERPINB6/MFGE8/SPESP1/ENPP4/SCAMP1/CA4/ICA1/ITGAM/DRD2/PCSK2/MGAM/SCG5/EGF/SPAG9/PGM2/RAP1B/RPH3A/SYT5/B2M/SYTL4/HLA-B/HLA-C/HPSE/KLK2/CD36/FN1/DNAJC13/C3/IGF1/ITGAX/SPINK5/SKIL/PROS1/MPO/DSP/RAB18/SPAG6/TMEM30A/SELL/CEACAM6/ABCA12/CD38/CCDC136/SH3GL3/ACTN1/COL1A1/PLAT/CEP290/FRK/DNAJC3/BIN2/TMBIM1/TMED2/PECAM1/ANXA2/DSG1/CHI3L1/TRH/L…
GOMF_PASSIVE_TRANSMEMBRANE_TRANSPORTER_ACTIVITY	GOMF_PASSIVE_TRANSMEMBRANE_TRANSPORTER_ACTIVITY	GOMF_PASSIVE_TRANSMEMBRANE_TRANSPORTER_ACTIVITY	177	0.210516	1.58798	0.00444501	0.0533598	0.0448184	1520	tags=30%, list=18%, signal=25%	ANO5/PDPN/GLRA1/ITPR2/TMEM150C/TRPM6/SCN3A/KCNN3/KCNA4/CNR1/TRPC3/KCNJ8/TRPA1/KCNH1/TTYH1/PKD1L2/P2RX7/CACNA1A/SLC24A2/SCN2A/CHRND/TMC1/SCN7A/BEST3/NALCN/BSND/TMC2/CACNB4/KCNQ3/CLIC5/GRIN2B/CFTR/SLC26A7/GABRB2/PIEZO2/PKD1L3/KCNS3/TMC7/GABRB1/GRIN3A/GJC1/ANXA2/RYR3/GRIA1/KCNMA1/OPRM1/KCNJ9/TRPM3/KCNA2/CACNA1D/SCN10A/TMC3/KCNH8
GOBP_MULTI_ORGANISM_REPRODUCTIVE_PROCESS	GOBP_MULTI_ORGANISM_REPRODUCTIVE_PROCESS	GOBP_MULTI_ORGANISM_REPRODUCTIVE_PROCESS	334	0.188807	1.58378	0.00163288	0.0273878	0.0230038	1368	tags=24%, list=16%, signal=21%	NELL2/MEIOC/TIMP1/GLRA1/PAPPA/STC2/MERTK/SERPINE2/TEX14/MFGE8/CFAP97/SPESP1/RIMS1/RPS6KB1/SPP1/OVOL1/DDX3Y/PLB1/BMPR1B/PGF/CNR1/ABAT/TRPC3/APOB/EIF5A2/TDRD6/NECTIN3/SPEF2/KDM1B/ZAN/WNT4/SMURF2/VMP1/POU4F2/PYGO1/NPM2/WIPF3/PIWIL2/TSNAX/CABYR/BMP4/RAD51C/HOOK1/TPPP2/IGF1/SKIL/TMF1/PRLR/SPAG6/MMP2/DPY19L2/RB1/ZCWPW1/ADCYAP1R1/ATP1A4/TESMIN/CD38/RXFP1/QKI/CCDC136/CLIC5/PLAT/CNTD1/CFTR/RAI14/ADAM5/ARI…
BENPORATH_EED_TARGETS	BENPORATH_EED_TARGETS	BENPORATH_EED_TARGETS	419	0.184581	1.58377	0.000353366	0.00861767	0.00723822	1973	tags=35%, list=24%, signal=28%	LRCH2/REPS2/MLLT3/TRHDE/DDAH1/PAPPA/HLF/CNRIP1/SLCO5A1/STC2/HOXA1/ANKRD18B/TRHDE-AS1/PARP12/ALOX5/CAMK2N1/ST8SIA1/FZD2/ANKRD18A/HHIP/PITX2/SIX1/TM6SF1/B4GALT6/GPR12/COL25A1/GALNT10/H1-0/BMPR1B/ISL1/PTGER3/CYP1B1/STK17A/SETD7/COL24A1/RPS6KA6/PAX6/TRPA1/KCNH1/CA10/SCUBE3/ADRB1/SLC26A4/SUSD4/ELMOD1/TTYH1/POU4F2/HOPX/COLEC12/ADCY4/ANKRD20A1/ANXA2R/SELENOS/HLA-B/NRIP3/HLA-C/BARHL2/DCHS2/FBN2/COL4A6/DO…
FOSTER_TOLERANT_MACROPHAGE_DN	FOSTER_TOLERANT_MACROPHAGE_DN	FOSTER_TOLERANT_MACROPHAGE_DN	177	0.209084	1.57718	0.00498379	0.0571658	0.0480151	2100	tags=36%, list=25%, signal=27%	NCOA7/PPM1K/SNX10/ALCAM/NECTIN4/ENDOD1/TRIM21/FAS/NR3C1/FAM241A/ARHGEF3/DRAM1/LIPG/CASP7/MTMR7/TLK2/NOS2/GCNT2/FRMD4A/HOPX/SLC4A7/UACA/AEBP2/NAMPT/INPP1/TMEM30A/RCN1/MITD1/TNC/WHAMM/TMEM229B/NLRC5/ZNF800/SLC30A1/ARF4/MGAT4A/RAI14/GDA/ADGRG6/SMIM36/STAT3/PDLIM5/PCGF5/SLFN5/PLOD2/LCK/GNB4/ETNK1/TRA2A/SLC30A4/NFKBIZ/FMR1/IQSEC2/CREB5/JARID2/SHISA3/FMNL2/LNPK/CEMIP2/USP12/XRN1/PARP8/CA2
GOCC_SECRETORY_GRANULE_MEMBRANE	GOCC_SECRETORY_GRANULE_MEMBRANE	GOCC_SECRETORY_GRANULE_MEMBRANE	122	0.227933	1.57639	0.0108808	0.0953984	0.0801278	1563	tags=31%, list=19%, signal=26%	SNCA/SVIP/ITPR2/SERPINB6/MFGE8/ENPP4/SCAMP1/CA4/ICA1/ITGAM/MGAM/RAP1B/SYT5/SYTL4/HLA-B/HLA-C/CD36/DNAJC13/ITGAX/DSP/RAB18/TMEM30A/SELL/CEACAM6/ABCA12/CD38/CCDC136/TMBIM1/TMED2/PECAM1/DSG1/LILRB3/RAB6A/TRIP11/ABCC4/ATP8B4/IQGAP1/PTAFR
LIM_MAMMARY_STEM_CELL_UP	LIM_MAMMARY_STEM_CELL_UP	LIM_MAMMARY_STEM_CELL_UP	217	0.202714	1.57631	0.00316447	0.042671	0.0358406	1399	tags=28%, list=17%, signal=24%	LRCH2/SNCA/PDPN/PCDH19/ITGA1/RARB/CNRIP1/CPNE8/SYNM/KANK4/NGFR/SORBS1/FAS/ACTA2/GNAI1/PGF/SLIT3/COL4A2/THY1/TENM3/CRISPLD1/NECTIN3/SIAH2/ANTXR1/LAMA3/ARMH4/ABI3BP/IL17RD/CD36/NTRK2/STAC/PROS1/EGFR/TRIM29/MMP2/VGLL3/CACNB4/SVEP1/QKI/DKK3/FAM184A/COL4A1/TNS1/CLMP/SCML2/CDH13/PRRX1/RELN/ENPP2/LIFR/NRP1/MYH11/NETO2/SEMA5A/GJC1/PRICKLE1/ELK3/COL17A1/STXBP4/KCNMA1
BLANCO_MELO_COVID19_SARS_COV_2_INFECTION_A594_ACE2_EXPRESSING_CELLS_UP	BLANCO_MELO_COVID19_SARS_COV_2_INFECTION_A594_ACE2_EXPRESSING_CELLS_UP	BLANCO_MELO_COVID19_SARS_COV_2_INFECTION_A594_ACE2_EXPRESSING_CELLS_UP	237	0.200467	1.57446	0.00291098	0.0403969	0.0339305	2842	tags=46%, list=34%, signal=31%	HDAC9/SALL1/PPM1K/IFIT5/SLCO5A1/PARP12/HOTAIRM1/TRIM21/LMO2/GOLGA7B/TLK2/DHX58/MIER1/ARHGAP30/PLSCR1/AEBP2/CEP85L/CEBPB/HDX/RUNX2/SKIL/SLC16A14/TRIM38/PSMB9/IL22RA1/CD200R1/SLC6A12/IKZF3/AGBL3/OAS3/NLRC5/CYLD/ARL5B/DDX60/CNTD1/LINC01881/H2BC20P/ADAM32/MYSM1/FBXW7/DCAF4L1/ATP6V1G2/IRF1-AS1/PSMB8-AS1/NIPAL4/SUGT1P1/H4C9/BHLHE41/HSH2D/PARP9/C3orf35/RASSF5/NFKBIZ/TAF1D/GADD45A/PPP4R2/ANKRD12/CHD2/LIN…
MASSARWEH_TAMOXIFEN_RESISTANCE_UP	MASSARWEH_TAMOXIFEN_RESISTANCE_UP	MASSARWEH_TAMOXIFEN_RESISTANCE_UP	243	0.19892	1.57123	0.00206703	0.0320197	0.0268942	1913	tags=32%, list=23%, signal=25%	PTPN13/TENT5A/ALCAM/SLC41A2/USP53/NECTIN4/RASGEF1A/HOTAIRM1/PITX2/MEF2A/B4GALT6/ICA1/FAS/GALNT10/HS6ST2/TRIQK/FAM171B/NFIA/HEXIM1/DRAM1/CASP7/PCTP/DYNLL2/EPB41L2/PSMB8/COLEC12/DNM3/MANSC1/BCAS1/ARFGEF3/CD36/TPMT/NUCB2/DOCK11/INPP1/PRAME/PARM1/ERBB4/SKIL/UTRN/CEACAM6/LITAF/PDGFC/LURAP1L/QKI/CYLD/SAMD4A/ARF4/MGAT4A/GUCY1A2/TCEA3/CAST/SPAG1/SH3BGRL/TM9SF3/ARAP3/CDH11/ELL2/KCNMA1/GOLT1B/UGGT2/MICB/SP…
GOBP_INORGANIC_ION_TRANSMEMBRANE_TRANSPORT	GOBP_INORGANIC_ION_TRANSMEMBRANE_TRANSPORT	GOBP_INORGANIC_ION_TRANSMEMBRANE_TRANSPORT	343	0.184579	1.55574	0.00129168	0.0229661	0.0192898	1568	tags=28%, list=19%, signal=24%	ANO5/SNCA/FGF2/GLRA1/ITPR2/SLC41A2/SLC30A10/TRPM6/WNK4/DRD2/SCN3A/KCNN3/KCNA4/PSEN2/SLC9A9/MRLN/STK39/NOS1/TRPC3/THY1/KCNJ8/TRPA1/KCNH1/SLC26A4/HECW1/RGS7/VMP1/TTYH1/HFE/PKD1L2/STEAP2/P2RX7/CACNA1A/FGF14/SLC24A2/SLC9A7/RGS4/SLC4A7/SCN2A/TMC1/SCN7A/GRM5/HECW2/SLC6A15/STAC/UTRN/PLCG2/SLC4A5/NALCN/PTPN3/SLC4A1/TMC2/CACNB4/SLC6A12/SLC6A13/ATP1A4/SLC34A1/SLC30A1/KCNQ3/GRIN2B/CFTR/ATP1B4/SLC26A7/GABRB2…
SMID_BREAST_CANCER_BASAL_UP	SMID_BREAST_CANCER_BASAL_UP	SMID_BREAST_CANCER_BASAL_UP	245	0.194839	1.54965	0.00337823	0.0445005	0.0373772	1490	tags=27%, list=18%, signal=22%	PDPN/GLDC/MACROH2A2/QPCT/CCKBR/SYNM/IL12RB2/CRABP1/ST8SIA1/PCOLCE2/MFGE8/HSPA4L/SPP1/DNAJB4/PART1/COL4A2/PAX6/FNDC4/MAP2/FAT2/TTYH1/CACNA1A/EPB41L2/CHML/DNM3/RAB6B/ACAN/MUC16/HPSE/PLSCR1/ARNTL2/RRAS2/PRAME/SLC6A15/PLIN2/EGFR/TRIM29/ADORA2B/LTBP1/TCEAL2/CHI3L2/MET/PERP/DSG2/CD38/QKI/ACTN1/FAT1/KLF5/ADGRG6/PRSS16/GJC1/ANP32E/DSG1/FXYD5/CHI3L1/NMU/NCALD/PLOD2/STXBP6/NPR3/CENPE/PCP4/TAP1/UGT8
GOBP_REGULATION_OF_RESPONSE_TO_EXTERNAL_STIMULUS	GOBP_REGULATION_OF_RESPONSE_TO_EXTERNAL_STIMULUS	GOBP_REGULATION_OF_RESPONSE_TO_EXTERNAL_STIMULUS	343	0.183844	1.54955	0.00155769	0.0263805	0.0221577	1736	tags=30%, list=21%, signal=25%	SNCA/FGF2/CTNNA2/SERPINE2/ERAP1/ALOX5/CAMK2N1/ENPP4/DPP4/PAK3/TRIM21/DRD2/SPP1/ISL1/PGF/CNR1/PTGER3/STK39/ABAT/HEXIM1/FNDC4/S1PR1/C5/IL16/WNT4/RIPOR2/SUSD4/POU4F2/DHX58/PLK2/SMAD3/NTRK3/HOPX/SELENOS/USP29/F2RL1/HLA-B/TRIM5/HPSE/PLSCR1/CEBPB/CD36/C3/IGF1/NUCB2/SPINK5/ADTRP/SERPINB9/PROS1/PLCG2/TRIM38/ADORA2B/RB1/CD200R1/RGMA/MET/AIF1/OAS3/LACC1/NLRC5/CYLD/MICA/TNFRSF1A/PYHIN1/PDE2A/DDX60/PLAT/FGF1…
GOBP_CALCIUM_ION_TRANSPORT	GOBP_CALCIUM_ION_TRANSPORT	GOBP_CALCIUM_ION_TRANSPORT	156	0.213972	1.54949	0.00928693	0.0867635	0.0728751	1470	tags=28%, list=18%, signal=23%	SNCA/FGF2/HOMER2/ITPR2/STC2/TRPM6/DRD2/PSEN2/MRLN/NOS1/TRPC3/THY1/TRPA1/IL16/EGF/VMP1/PKD1L2/P2RX7/CACNA1A/SLC24A2/RGS4/TMC1/STAC/PLCG2/NALCN/FCRL3/TMC2/CACNB4/ADCYAP1R1/CD84/SLC30A1/GRIN2B/EPPIN/PKD1L3/GRIN3A/ANXA2/RYR3/TRDN/OPRM1/LCK/TRPM3/CACNA1D/GP5
GOBP_REGULATION_OF_CELL_ADHESION	GOBP_REGULATION_OF_CELL_ADHESION	GOBP_REGULATION_OF_CELL_ADHESION	291	0.189026	1.54492	0.00235116	0.0348439	0.0292664	1453	tags=26%, list=17%, signal=22%	PDPN/BTN2A2/NDNF/SERPINE2/ALOX5/DPP4/TGFBI/SERPINI2/LMO7/ATXN3/ABAT/CYP1B1/THY1/TENM3/PAWR/SPN/S1PR1/MAGI1/WNT4/RIPOR2/FOXA1/GCNT2/HHLA2/LAMA3/HFE/PDE3B/ABI3BP/SPTA1/SMAD3/EPHA2/PKHD1/FUT1/VAV3/B2M/HSPH1/BMP4/CEBPB/CD36/FN1/CYTH3/SKAP1/IGF1/SPINK5/ADTRP/UTRN/PRLR/VWC2/VTCN1/MMP2/CEACAM6/ABCA12/TNC/AIF1/CCDC80/HLA-DMB/COL1A1/CD160/PTPN2/CDH13/EFNB3/NRP1/EDIL3/FRMD5/GPNMB/SEMA5A/ERBB3/C2CD4B/FXYD5/…
GOBP_RESPONSE_TO_ORGANIC_CYCLIC_COMPOUND	GOBP_RESPONSE_TO_ORGANIC_CYCLIC_COMPOUND	GOBP_RESPONSE_TO_ORGANIC_CYCLIC_COMPOUND	335	0.182656	1.54164	0.00246719	0.0359836	0.0302236	1575	tags=27%, list=19%, signal=23%	SNCA/GLDC/HOMER2/ABCB4/PAPPA/ITPR2/STC2/TRIM68/MYOG/SIX1/RPS6KB1/PAK3/DRD2/SPP1/NR3C2/TXNIP/GNAI1/TRERF1/NR3C1/ISL1/BECN1/SLIT3/CNR1/ABAT/CYP1B1/TRPC3/APOB/KCNJ8/TRPA1/CASP7/RGS8/FOXA1/POU4F2/GNG2/P2RX7/RAP1B/NTRK3/ELAVL4/COLEC12/RGS4/BMP4/CEBPB/CD36/ADTRP/CFLAR/PRKAA1/PLIN2/TMF1/CPS1/EGFR/MMP2/ADCYAP1R1/AIF1/SLC34A1/CD38/CCDC62/GABPA/ATF1/PDE2A/COL1A1/PLAT/CFTR/FGF23/GABRB2/TFPI/KYNU/SLC6A1/GABR…
WONG_ADULT_TISSUE_STEM_MODULE	WONG_ADULT_TISSUE_STEM_MODULE	WONG_ADULT_TISSUE_STEM_MODULE	310	0.185553	1.54107	0.0030115	0.0413813	0.0347573	1984	tags=32%, list=24%, signal=25%	ABCB1/MLLT3/HOMER2/SNX10/KITLG/HLF/ALCAM/TOB1/PRDM5/PGAP4/FZD2/MFGE8/PDLIM3/MEF2A/DNAJB4/LMO2/RGS5/PTGER3/COL4A2/CYP1B1/ARMCX4/MUC4/SESN1/TENM3/ZDBF2/SCG5/FOXA1/LYSMD3/PLK2/DYNLL2/MAN1A1/B2M/RGS4/SYTL4/CMTM8/CEBPB/PPIC/FN1/TCEAL9/GKAP1/SLC6A15/STAC/RCAN3/DCUN1D1/LTBP1/TNC/PROCR/DKK3/IRF6/COL4A1/MYH3/ACTN1/PDE2A/COL1A1/ELOVL6/FGF1/CASP4/CAPRIN2/RAI14/CPHXL/KLF10/NID2/RELN/TMBIM1/ZRSR2/EPHA5/ELL2/C…
HAN_SATB1_TARGETS_DN	HAN_SATB1_TARGETS_DN	HAN_SATB1_TARGETS_DN	167	0.209211	1.53751	0.00833572	0.08095	0.0679921	1706	tags=31%, list=20%, signal=25%	LIPA/QPCT/TENT5A/GSAP/SYNJ2/TGFBI/DNAJB4/NR3C2/TRERF1/LARP6/CYP1B1/SCG5/RADX/CDC42EP3/MYO6/HHLA2/COIL/CHML/SH3TC2/ADGRF1/RGS4/EFEMP1/HMGN5/RAD51C/FN1/PRR16/RUNX2/EGFR/PSMB9/INHBE/TNC/TUBG2/TNFSF15/PNPO/TNS1/PLAT/ADGRG6/MAST4/NRP1/PSMC3IP/ERBB3/SPTLC3/STXBP6/CDH11/NEDD9/QSER1/CLU/FUT8/ASTN1/MXRA8/ID4
GOBP_REGULATION_OF_CELL_ACTIVATION	GOBP_REGULATION_OF_CELL_ACTIVATION	GOBP_REGULATION_OF_CELL_ACTIVATION	196	0.199638	1.53359	0.00996681	0.0903857	0.0759175	1736	tags=30%, list=21%, signal=24%	SNCA/PDPN/BTN2A2/MERTK/SERPINE2/STAT6/DPP4/ITGAM/ACTA2/CNR1/ABAT/THY1/PAWR/SPN/RIPOR2/HHLA2/HFE/SPTA1/VAV3/B2M/F2RL1/HSPH1/PLSCR1/BMP4/CEBPB/FN1/IGF1/SPINK5/VTCN1/ADORA2B/INPP5D/FCRL3/PIBF1/AIF1/IKZF3/CD38/CD84/MICA/HLA-DMB/CD160/PTPN2/EFNB3/GPNMB/ILDR2/RUNX1/HAVCR1/LCK/GP5/TREM2/CLNK/PTAFR/ADGRE2/NFKBIZ/CAMK4/CD74/PJA2/ZC3H8/CD47
GOBP_REGULATION_OF_CELL_CELL_ADHESION	GOBP_REGULATION_OF_CELL_CELL_ADHESION	GOBP_REGULATION_OF_CELL_CELL_ADHESION	155	0.212453	1.53103	0.00965886	0.0890853	0.0748252	1409	tags=25%, list=17%, signal=21%	PDPN/BTN2A2/SERPINE2/ALOX5/DPP4/ABAT/THY1/TENM3/PAWR/SPN/MAGI1/WNT4/RIPOR2/FOXA1/GCNT2/HHLA2/HFE/SPTA1/PKHD1/B2M/HSPH1/BMP4/CEBPB/SKAP1/IGF1/ADTRP/VTCN1/CEACAM6/ABCA12/AIF1/HLA-DMB/CD160/PTPN2/EFNB3/GPNMB/FXYD5/ILDR2/RUNX1/LCK
GOBP_POSITIVE_REGULATION_OF_GENE_EXPRESSION	GOBP_POSITIVE_REGULATION_OF_GENE_EXPRESSION	GOBP_POSITIVE_REGULATION_OF_GENE_EXPRESSION	388	0.181497	1.53094	0.000825654	0.0166484	0.0139834	1733	tags=29%, list=21%, signal=24%	MEIOC/FGF2/TENT5A/TOB1/STAT6/IL12RB2/RIMS1/MEF2A/RPS6KB1/BTN3A1/DRD2/BTN3A2/ACTA2/LARP6/ISL1/CYP1B1/APOB/EIF5A2/PAX6/PAWR/SPN/C5/IL16/OCLN/EGF/NOS2/HHLA2/DHX58/HFE/P2RX7/TP53INP1/SMAD3/PLA2R1/NTRK3/ELAVL4/B2M/F2RL1/HPSE/BARHL2/HMGN5/PIWIL2/PLSCR1/BMP4/CEBPB/CD36/IL1RAP/FN1/C3/IGF1/ITGAX/NTRK2/ADTRP/PRKAA1/PRR16/RUNX2/PLCG2/TMF1/VTCN1/EGFR/ADORA2B/PIBF1/MUSK/AIF1/OAS3/LACC1/HEY2/QKI/SAMD4A/GABPA/C…
GOCC_SYNAPTIC_MEMBRANE	GOCC_SYNAPTIC_MEMBRANE	GOCC_SYNAPTIC_MEMBRANE	179	0.20171	1.52811	0.0104969	0.093317	0.0783795	1495	tags=30%, list=18%, signal=25%	KCTD16/GLRA1/ERC2/ADAM23/FLRT3/KCTD12/RIMS1/DRD2/STX1B/CNR1/LIN7A/CDH8/OTOF/KCNH1/NECTIN3/LIN7C/NTRK3/RPH3A/DNM3/ITSN2/RGS9/SCN2A/CHRND/GRM5/ZNRF2/ERBB4/UTRN/COL13A1/MUSK/SLC30A1/PDE2A/GRIN2B/GABRB2/EFNB3/SLC6A1/GABRB1/NRP1/GRIN3A/AKAP9/OPRK1/GRIA1/FCHO2/ATAD1/KCNMA1/OPRM1/KCNJ9/SLC6A2/EPHA4/STRN/KCNA2/CHRM5/SCN10A/PRRT2
GOBP_SECRETION	GOBP_SECRETION	GOBP_SECRETION	365	0.179847	1.52334	0.00248237	0.0359836	0.0302236	1568	tags=27%, list=19%, signal=23%	SNCA/ABCB4/SNX10/ERC2/MERTK/CCKBR/SERPINE2/SYTL2/TPH1/ALOX5/RIMS1/SCAMP1/WNK4/ICA1/ITGAM/DRD2/SYT13/SPP1/EXPH5/STX1B/ISL1/RAB3IP/CNR1/PTGER3/STK39/ABAT/LIN7A/OTOF/SYT16/SCG5/SNCG/CCDC186/CD2AP/EGF/LIN7C/NOS2/MYO6/AIMP1/HFE/STEAP2/P2RX7/FRMD4A/RAP1B/PLA2R1/RPH3A/RAB21/SYT5/F2RL1/SYTL4/IGF1/NTRK2/ADTRP/NSF/PRKAA1/ERBB4/SLC4A5/TMF1/PRLR/ADORA2B/MC4R/ABCA12/KMO/CD38/SNPH/CYB5R4/CD84/TNFRSF1A/SLC30A1/…
GOBP_IMMUNE_RESPONSE	GOBP_IMMUNE_RESPONSE	GOBP_IMMUNE_RESPONSE	485	0.175511	1.51839	0.000755023	0.0156317	0.0131295	1736	tags=28%, list=21%, signal=24%	SNCA/BTN2A2/TRBV4-2/TRBV4-1/IFIT5/ALCAM/STAT6/TRBV7-2/TRIM68/DOCK2/ERAP1/ALOX5/RPS6KB1/PAK3/BTN3A1/ITGAM/TRIM21/DRD2/FAS/BTN3A2/TRBV3-1/PKHD1L1/IL2RG/CNR1/THY1/HEXIM1/PAWR/SPN/C5/IL16/NOS2/SUSD4/HHLA2/DHX58/HFE/BTN3A3/PLK2/MAPK10/P2RX7/SMAD3/BTN1A1/COLEC12/SELENOS/VAV3/USP29/B2M/F2RL1/HLA-B/TRIM5/HLA-C/PLSCR1/TREML4/CEBPB/CD36/IL1RAP/MASP1/C3/SKAP1/DOCK11/SPINK5/SERPINB9/PLCG2/TRBV7-4/TRIM38/VTCN…
RODRIGUES_THYROID_CARCINOMA_POORLY_DIFFERENTIATED_DN	RODRIGUES_THYROID_CARCINOMA_POORLY_DIFFERENTIATED_DN	RODRIGUES_THYROID_CARCINOMA_POORLY_DIFFERENTIATED_DN	361	0.178504	1.51571	0.00280808	0.0393794	0.0330758	2441	tags=37%, list=29%, signal=28%	TMTC1/ABLIM1/ITGA1/HOMER2/CCDC152/TOB1/TMEM150C/SYNJ2/KCTD12/ERAP1/BOC/NDUFA5/GALNT10/SPP1/TXNIP/ACTA2/RGS5/TMEM106B/PGF/NFIA/ATXN3/ARHGEF3/COL4A2/ABAT/SESN1/C3orf52/TARS3/LIPG/MAGI1/SEC62/OCLN/CYBRD1/DYNLL2/ZNF652/MANSC1/SLC9A7/NUDT16/CD302/PCMTD1/TPMT/NAMPT/GXYLT2/CFLAR/RCAN3/TMF1/CSRP1/TRIM38/RAB18/SUGT1P3/SMPDL3A/SLAIN2/GPRASP1/PNISR/CYLD/CCDC80/WDR72/COL4A1/TNS1/GRHL2/PLAT/RILPL2/MALAT1/ABCA…
RODRIGUES_THYROID_CARCINOMA_ANAPLASTIC_DN	RODRIGUES_THYROID_CARCINOMA_ANAPLASTIC_DN	RODRIGUES_THYROID_CARCINOMA_ANAPLASTIC_DN	228	0.191535	1.50341	0.01083	0.0951841	0.0799478	2269	tags=36%, list=27%, signal=27%	MLLT3/ITGA1/TOB1/TMEM150C/FLRT3/KCTD12/NDUFA5/SLC25A27/ACTA2/GNAI1/RGS5/ABAT/SESN1/ZC2HC1A/MLPH/ASB5/MAGI1/SLC26A4/LPCAT2/ST6GALNAC3/CYBRD1/ABI3BP/PAPSS2/MAN1A1/SYNPO2/NME7/CD302/MAGEH1/PARM1/RCAN3/TMF1/CSRP1/RAB18/SLC6A13/GPRASP1/SERTM1/NEB/CYLD/CCDC80/WDR72/TENT5C/TNS1/RILPL2/ENO3/RNPC3/LIFR/GLIS3/SH3BGRL/PDLIM5/STXBP6/TRIM58/CAMK1D/NEDD9/SESN3/FRMD4B/TRIB1/CROT/RASSF5/NPAS3/ZNF678/BEX4/DCAF17/…
YOSHIMURA_MAPK8_TARGETS_UP	YOSHIMURA_MAPK8_TARGETS_UP	YOSHIMURA_MAPK8_TARGETS_UP	443	0.174713	1.49912	0.000914046	0.0177689	0.0149246	1487	tags=26%, list=18%, signal=23%	NELL2/SNCA/TRHDE/KITLG/RARB/NGFR/COL9A1/ALOX5/ST8SIA1/RIMS1/DPP4/PAK3/CHORDC1/DRD2/SCN3A/KCNN3/SERPINI2/KCNA4/ISL1/PTGER3/NOS1/ABAT/APOB/MUC4/KCNJ8/SCG5/SNCG/MAP2/MTMR7/FAT2/RGS8/DNAH6/ADRB1/NOS2/DNAH2/LAMA3/ST6GALNAC3/CACNA1A/NTRK3/ELAVL4/FGF14/PSMB8/SLC24A2/FUT1/F2RL1/GLP1R/ACAN/EFEMP1/BARHL2/SLC22A7/PRKG2/RGS9/HOOK1/SCN7A/GRM5/MASP1/IGF1/CEP95/NTRK2/SLCO1A2/ERBB4/VEZF1/PLCG2/PRLR/NALCN/VTCN1/E…
MEISSNER_BRAIN_HCP_WITH_H3K4ME3_AND_H3K27ME3	MEISSNER_BRAIN_HCP_WITH_H3K4ME3_AND_H3K27ME3	MEISSNER_BRAIN_HCP_WITH_H3K4ME3_AND_H3K27ME3	463	0.172704	1.4913	0.00159141	0.0267991	0.0225093	1532	tags=26%, list=18%, signal=23%	ANO5/GLDC/SALL1/NDNF/MYO16/TRHDE/SNX7/KITLG/PAPPA/SLCO5A1/CCKBR/SERPINE2/KANK4/SLC30A10/FZD2/TRPM6/HHIP/CA4/WNK4/DRD2/SYT13/TXNIP/MINAR1/COL15A1/CPNE2/ISL1/PGF/PTGER3/ABAT/LIN7A/KCNJ8/PAX6/BNC2/SKAP2/KCNH1/PAWR/S1PR1/CA10/SCUBE3/SLC26A4/OCLN/WNT4/LPCAT2/CGNL1/AP1S3/EPHA2/COLEC12/FREM2/F2RL1/IL17RD/NRIP3/UACA/CMTM8/CD302/POPDC3/FN1/GXYLT2/GFRA1/RRAS2/SCUBE1/STAC/UTRN/PROS1/PLCG2/VWC2/EGFR/PTPN3/AD…
GOBP_CIRCULATORY_SYSTEM_PROCESS	GOBP_CIRCULATORY_SYSTEM_PROCESS	GOBP_CIRCULATORY_SYSTEM_PROCESS	232	0.185913	1.46492	0.00936967	0.0873857	0.0733977	1492	tags=27%, list=18%, signal=23%	ABCB1/TRHDE/DDAH1/ITGA1/F5/ERAP1/MEF2A/DRD2/ACTA2/ISL1/CNR1/STK39/NOS1/ABAT/SLC22A5/KCNJ8/ADRB1/OCLN/NOS2/MDM2/ABCC3/SMAD3/HOPX/SGCD/F2RL1/RGS4/GLP1R/KLK2/CD36/DSP/SLC4A5/CPS1/ADORA2B/MMP2/SGCZ/SLC28A2/SLC6A13/DSG2/ATP1A4/GNA13/SVEP1/CD38/HEY2/SLC22A8/PDE2A/NPR1/SLC15A2/SLC6A1/CYP4F12/GJC1/AKAP9/C2CD4B/TRDN/PKP2/NCALD/TACR3/NPR3/CD34/KCNMA1/CACNA1D/ABCC4/SCN10A
GOBP_REGULATION_OF_IMMUNE_SYSTEM_PROCESS	GOBP_REGULATION_OF_IMMUNE_SYSTEM_PROCESS	GOBP_REGULATION_OF_IMMUNE_SYSTEM_PROCESS	461	0.168737	1.45595	0.00311919	0.0422877	0.0355186	1736	tags=28%, list=21%, signal=24%	SNCA/BTN2A2/KITLG/MERTK/STAT6/ERAP1/DPP4/PAK3/BTN3A1/ITGAM/TRIM21/DRD2/BTN3A2/PGF/CNR1/STK39/THY1/TSC22D3/HEXIM1/PAWR/SPN/C5/NOS2/RIPOR2/SUSD4/POU4F2/HHLA2/DHX58/HFE/BTN3A3/PLK2/MAPK10/P2RX7/SPTA1/SMAD3/BTN1A1/COLEC12/SELENOS/VAV3/USP29/B2M/F2RL1/HLA-B/HSPH1/TRIM5/PLSCR1/TREML4/BMP4/CEBPB/FAXDC2/CD36/FN1/MASP1/C3/SKAP1/IGF1/SPINK5/ADTRP/SERPINB9/PLCG2/VTCN1/ADORA2B/INPP5D/FCRL3/RB1/CD200R1/C7/LYV…
GOCC_SECRETORY_VESICLE	GOCC_SECRETORY_VESICLE	GOCC_SECRETORY_VESICLE	361	0.171367	1.45512	0.00692881	0.0717258	0.0602445	1877	tags=30%, list=22%, signal=24%	SNCA/TIMP1/ITGA1/SVIP/SNX10/QPCT/ITPR2/F5/SERPINE2/SYTL2/DOCK2/ALOX5/SERPINB6/MFGE8/SPESP1/ENPP4/SCAMP1/CA4/ICA1/ITGAM/DRD2/SYT13/PCSK2/MGAM/STX1B/RAB3IP/OTOF/SCG5/EGF/SPAG9/SV2C/BTBD8/PGM2/RAP1B/RPH3A/SYT5/B2M/SYTL4/HLA-B/HLA-C/HPSE/KLK2/CD36/FN1/DNAJC13/C3/IGF1/ITGAX/SPINK5/SKIL/PROS1/MPO/DSP/RAB18/SPAG6/TMEM30A/SELL/CEACAM6/ABCA12/CD38/CCDC136/SH3GL3/SYT17/ACTN1/COL1A1/PLAT/CEP290/FRK/DNAJC3/B…
GOMF_ZINC_ION_BINDING	GOMF_ZINC_ION_BINDING	GOMF_ZINC_ION_BINDING	325	0.174573	1.44913	0.0086665	0.0829716	0.0696901	2304	tags=35%, list=28%, signal=27%	SNCA/TIMP1/TRHDE/ZNF208/GLRA1/QPCT/PAPPA/RARB/TRPS1/TRIM71/TRIM68/ZCCHC12/ERAP1/HHIP/CA4/CHORDC1/ZNF385B/TRIM21/CALB1/NR3C2/ZMAT3/ZCCHC10/NR3C1/ZDBF2/CA10/KDM1B/SIAH2/ZFAND6/MDM2/DHX58/ESCO1/SMAD3/RPH3A/TRIM5/DTX4/PLSCR1/MARCHF11/ADAMTS9/UTRN/PGGT1B/CSRP1/ZNF385C/TRIM38/NBR1/TRIM29/MMP2/VAT1L/ZCWPW1/SMPDL3A/LITAF/AGBL3/EEA1/CYLD/ADH1B/SLU7/TRIM31/PDE2A/AGBL1/TRIM56/GRIN2B/TCEA3/NPEPPS/GDA/PHC3/EN…
GOBP_DEFENSE_RESPONSE_TO_OTHER_ORGANISM	GOBP_DEFENSE_RESPONSE_TO_OTHER_ORGANISM	GOBP_DEFENSE_RESPONSE_TO_OTHER_ORGANISM	335	0.171665	1.44888	0.00902291	0.0852531	0.0716064	1736	tags=29%, list=21%, signal=24%	SNCA/IFIT5/TRIM68/ERAP1/RPS6KB1/PAK3/ITGAM/TRIM21/DRD2/BECN1/KCNJ8/HEXIM1/SPN/C5/NOS2/SUSD4/DHX58/P2RX7/EPHA2/COLEC12/USP29/F2RL1/HLA-B/TRIM5/HLA-C/PLSCR1/TREML4/CEBPB/CD36/IL1RAP/MASP1/C3/ITGAX/SPINK5/SERPINB9/MPO/PLCG2/TMF1/TRIM38/TRIM29/STAB2/IL22RA1/C7/AIF1/OAS3/LACC1/NLRC5/CYLD/CD84/MICA/TNFRSF1A/EIF2AK2/PYHIN1/TRIM31/DDX60/CASP4/TRIM56/CD160/SENP7/PTPN2/MRC1/FRK/EPPIN/DNAJC3/KYNU/SLC15A2/LT…
GOCC_SUPRAMOLECULAR_POLYMER	GOCC_SUPRAMOLECULAR_POLYMER	GOCC_SUPRAMOLECULAR_POLYMER	386	0.171335	1.44828	0.0021243	0.0325346	0.0273267	1595	tags=27%, list=19%, signal=23%	KIF5C/SNCA/DYNC2H1/SYNM/PDLIM3/CDK5RAP3/MYH15/TNNT1/DNAH5/KIF7/ACTA2/DYNLT3/SKA2/PSEN2/COL4A2/ARHGAP18/DNAH8/SHTN1/CHMP2B/DNAH14/CCDC181/KCNJ8/TUBE1/SMN1/DNAH10/PAWR/MAP2/TLK2/CD2AP/DNAH6/MYO6/SMN2/DNAH12/COL6A3/DNAH2/DYNLL2/SYNPO2/DNM3/SELENOS/DCDC2/HSPH1/WIPF3/CCDC66/FBN2/RMDN2/HOOK1/TPPP2/COL4A6/MYO3A/KIF5A/DSP/CSRP1/NBR1/SPAG6/MMP2/LTBP1/SLC4A1/KRT10/KIF20B/KIF3A/AIF1/PGM5/WHAMM/SLAIN2/SNPH/T…
GOMF_TRANSITION_METAL_ION_BINDING	GOMF_TRANSITION_METAL_ION_BINDING	GOMF_TRANSITION_METAL_ION_BINDING	426	0.16833	1.4389	0.00358484	0.0462654	0.0388596	2304	tags=35%, list=28%, signal=27%	SNCA/TIMP1/TRHDE/ZNF208/GLRA1/CYP2S1/QPCT/PAPPA/F5/RARB/TRPS1/TRIM71/CYP4F3/TPH1/TRIM68/ZCCHC12/ERAP1/ALOX5/HHIP/ME1/TCHH/CA4/CHORDC1/ZNF385B/TRIM21/CALB1/NR3C2/ZMAT3/ZCCHC10/NR3C1/NOS1/CYP1B1/ZDBF2/SNCG/CA10/KDM1B/SIAH2/ZFAND6/MDM2/DHX58/ESCO1/SMAD3/RPH3A/TRIM5/DTX4/PLSCR1/NUDT16/FAXDC2/MARCHF11/ADAMTS9/UTRN/PGGT1B/CSRP1/ZNF385C/TRIM38/NBR1/TRIM29/MMP2/VAT1L/ZCWPW1/SMPDL3A/LITAF/AGBL3/LACC1/CYP2…
GOBP_ANATOMICAL_STRUCTURE_FORMATION_INVOLVED_IN_MORPHOGENESIS	GOBP_ANATOMICAL_STRUCTURE_FORMATION_INVOLVED_IN_MORPHOGENESIS	GOBP_ANATOMICAL_STRUCTURE_FORMATION_INVOLVED_IN_MORPHOGENESIS	467	0.163031	1.40627	0.00474732	0.0552731	0.0464254	1519	tags=25%, list=18%, signal=22%	HDAC9/PDPN/FGF2/SALL1/NDNF/DDAH1/TRIM71/HOXA1/NGFR/ERAP1/ALOX5/FZD2/MFGE8/MYOG/SIX1/MEF2A/TGFBI/TNNT1/CALB1/MINAR1/COL15A1/ISL1/PGF/COL4A2/NOS1/CYP1B1/THY1/PAX6/KCNH1/S1PR1/C5/WNT4/EGF/RIPOR2/AIMP1/FOXA1/LAMA3/PDE3B/PLK2/SMAD3/HOPX/EPHA2/COL22A1/FUT1/VAV3/HPSE/FBN2/BMP4/CD36/FN1/C3/ADAMTS9/ITGAX/SPINK5/ADTRP/CFLAR/SKIL/VEZF1/TMF1/CSRP1/STAB2/MMP2/WNT8A/RGMA/PERP/KIF20B/GNA13/PGM5/SLC34A1/HEY2/NEB…
GOBP_ENZYME_LINKED_RECEPTOR_PROTEIN_SIGNALING_PATHWAY	GOBP_ENZYME_LINKED_RECEPTOR_PROTEIN_SIGNALING_PATHWAY	GOBP_ENZYME_LINKED_RECEPTOR_PROTEIN_SIGNALING_PATHWAY	381	0.1672	1.40518	0.0088335	0.0838293	0.0704105	1555	tags=25%, list=19%, signal=21%	SNCA/FGF2/REPS2/ITGA1/TRIM71/MERTK/TOB1/NGFR/STAT6/FLRT3/SLC30A10/HHIP/RPS6KB1/PAK3/SORBS1/EPHA6/TXNIP/PDK4/BMPR1B/PGF/COL4A2/GRB14/SCUBE3/WNT4/EGF/SMURF2/GCNT2/HFE/SMAD3/NTRK3/SH3TC2/EPHA2/GREM2/IL17RD/EFEMP1/UBE2D1/FBN2/BMP4/NAMPT/COL4A6/IGF1/GKAP1/GFRA1/NTRK2/PRKAA1/ERBB4/RUNX2/SKIL/PRLR/VWC2/EGFR/PTPN3/MMP2/LTBP1/INHBE/RGMA/PDGFC/MET/MUSK/SVEP1/DKK3/COL4A1/COL1A1/PLAT/FGF1/FGF23/SH2D6/PTPN2/F…
GOBP_CHEMICAL_HOMEOSTASIS	GOBP_CHEMICAL_HOMEOSTASIS	GOBP_CHEMICAL_HOMEOSTASIS	443	0.156771	1.34518	0.0101069	0.0909709	0.076409	1596	tags=24%, list=19%, signal=21%	SNCA/HDAC9/FGF2/HOMER2/ABCB4/SNX10/PNPLA4/ITPR2/STC2/CCKBR/NGFR/ALOX5/SLC30A10/WNK4/GPR12/DRD2/CALB1/CCDC47/PDK4/SLC9A9/TMEM106B/CNR1/PTGER3/TLCD4/STK39/NOS1/TRPC3/TM6SF2/THY1/APOB/RIC3/EIF5A2/PAX6/TRPA1/CCDC186/LIPG/S1PR1/PRKAA2/SLC26A4/FOXA1/HFE/CYBRD1/STEAP2/P2RX7/CACNA1A/SMAD3/SGCD/PKHD1/SLC24A2/SLC9A7/B2M/F2RL1/GLP1R/SLC4A7/CD36/SCN7A/GRM5/PRKAA1/PLCG2/MED13/SLC4A5/CPS1/PTPN3/SLC4A1/ABCA12/A…

## Sheet: DN in 4xC
	ID	Description	setSize	enrichmentScore	NES	pvalue	p.adjust	qvalues	rank	leading_edge	core_enrichment
REACTOME_HDACS_DEACETYLATE_HISTONES	REACTOME_HDACS_DEACETYLATE_HISTONES	REACTOME_HDACS_DEACETYLATE_HISTONES	55	-0.653688	-3.48964	1e-10	1.8e-08	1.52e-08	1114	tags=60%, list=13%, signal=52%	H4C2/H2BC5/MTA1/H2AC17/H2AC11/H2AC13/H2AC14/H2AC21/H4C3/H2AC15/H2AC6/H3C2/H4-16/H4C15/H2BC11/H4C1/H4C13/H2BC17/H2AC8/H2BC8/H2BC18/HMG20B/H3C11/H2AC4/H2BC13/H2AC16/MBD3/H3C1/H3C13/H4C8/H3C10/H3C12/H3C6
REACTOME_DNA_METHYLATION	REACTOME_DNA_METHYLATION	REACTOME_DNA_METHYLATION	38	-0.693291	-3.38855	1e-10	1.8e-08	1.52e-08	735	tags=71%, list=9%, signal=65%	DNMT3A/H4C5/H4C2/H2BC5/H2AC14/DNMT1/H4C3/H2AC6/H3C2/H4-16/H4C15/H2BC11/H4C1/H4C13/H2BC17/H2AC8/H2BC8/UHRF1/H3C11/H2AC4/H2BC13/H3C1/H3C13/H4C8/H3C10/H3C12/H3C6
REACTOME_RMTS_METHYLATE_HISTONE_ARGININES	REACTOME_RMTS_METHYLATE_HISTONE_ARGININES	REACTOME_RMTS_METHYLATE_HISTONE_ARGININES	46	-0.663505	-3.35143	1e-10	1.8e-08	1.52e-08	1385	tags=67%, list=17%, signal=57%	DNMT3A/H4C5/WDR77/H4C2/SMARCA4/H2AC17/PRMT1/H2AC11/H2AC13/H2AC14/H2AC21/H4C3/H2AC15/H2AC6/H3C2/H4-16/H4C15/H4C1/H4C13/H2AC8/CDK4/CARM1/H3C11/H2AC4/H2AC16/H3C1/H3C13/H4C8/H3C10/H3C12/H3C6
NIKOLSKY_BREAST_CANCER_16P13_AMPLICON	NIKOLSKY_BREAST_CANCER_16P13_AMPLICON	NIKOLSKY_BREAST_CANCER_16P13_AMPLICON	75	-0.5835	-3.34051	1e-10	1.8e-08	1.52e-08	2841	tags=83%, list=34%, signal=55%	NHLRC4/CRAMP1/HAGH/FLYWCH2/ZNF598/IGFALS/HAGHL/WFIKKN1/PRSS27/METRN/SOX8/LMF1/SPSB3/DECR2/HS3ST6/KREMEN2/PKMYT1/NPRL3/MRPS34/CIAO3/TRAF7/HBQ1/HCFC1R1/ZNF205/IFT140/NUBP2/POLR3K/FAM234A/EME2/NME4/CLCN7/RAB11FIP3/ELOB/AXIN1/JMJD8/MPG/TSR3/STUB1/ANTKMT/RAB40C/CACNA1H/MAPK8IP3/PGAP6/MCRIP2/TBL3/THOC6/NPW/CHTF18/MRPL28/RPUSD1/SNRNP25/PKD1/METTL26/NTHL1/NME3/WDR90/RHOT2/PIGQ/CAPN15/PAQR4/RAB26/TELO2
REACTOME_HCMV_LATE_EVENTS	REACTOME_HCMV_LATE_EVENTS	REACTOME_HCMV_LATE_EVENTS	65	-0.601852	-3.33702	1e-10	1.8e-08	1.52e-08	2299	tags=75%, list=28%, signal=55%	CHMP3/VPS4A/H4C11/H2AC20/H4C12/MVB12A/H2BC21/VPS37C/NUP93/NUP85/H3C14/NUP62/NUP188/H4C5/NUP210/CHMP6/H4C2/VPS37B/H2BC5/H2AC17/H2AC11/H2AC13/H2AC14/H2AC21/H4C3/H2AC15/H2AC6/H3C2/H4-16/H4C15/H2BC11/H4C1/CHMP1A/H4C13/H2BC17/H2AC8/H2BC8/H2BC18/VPS28/H3C11/H2AC4/H2BC13/H2AC16/H3C1/H3C13/H4C8/H3C10/H3C12/H3C6
REACTOME_ACTIVATED_PKN1_STIMULATES_TRANSCRIPTION_OF_AR_ANDROGEN_RECEPTOR_REGULATED_GENES_KLK2_AND_KLK3	REACTOME_ACTIVATED_PKN1_STIMULATES_TRANSCRIPTION_OF_AR_ANDROGEN_RECEPTOR_REGULATED_GENES_KLK2_AND_KLK3	REACTOME_ACTIVATED_PKN1_STIMULATES_TRANSCRIPTION_OF_AR_ANDROGEN_RECEPTOR_REGULATED_GENES_KLK2_AND_KLK3	38	-0.679364	-3.32048	1e-10	1.8e-08	1.52e-08	735	tags=58%, list=9%, signal=53%	H2AC14/H4C3/H2AC6/H3C2/H4-16/H4C15/H2BC11/H4C1/H4C13/H2BC17/H2AC8/PKN1/H2BC8/H3C11/H2AC4/H2BC13/H3C1/H3C13/H4C8/H3C10/H3C12/H3C6
REACTOME_SIRT1_NEGATIVELY_REGULATES_RRNA_EXPRESSION	REACTOME_SIRT1_NEGATIVELY_REGULATES_RRNA_EXPRESSION	REACTOME_SIRT1_NEGATIVELY_REGULATES_RRNA_EXPRESSION	38	-0.679241	-3.31988	1e-10	1.8e-08	1.52e-08	735	tags=58%, list=9%, signal=53%	H2AC14/H4C3/H2AC6/H3C2/H4-16/TAF1C/H4C15/H2BC11/H4C1/H4C13/H2BC17/H2AC8/H2BC8/H3C11/H2AC4/H2BC13/H3C1/H3C13/H4C8/H3C10/H3C12/H3C6
REACTOME_ERCC6_CSB_AND_EHMT2_G9A_POSITIVELY_REGULATE_RRNA_EXPRESSION	REACTOME_ERCC6_CSB_AND_EHMT2_G9A_POSITIVELY_REGULATE_RRNA_EXPRESSION	REACTOME_ERCC6_CSB_AND_EHMT2_G9A_POSITIVELY_REGULATE_RRNA_EXPRESSION	41	-0.670655	-3.31463	1e-10	1.8e-08	1.52e-08	1114	tags=61%, list=13%, signal=53%	H4C2/H2BC5/MTA1/H2AC14/H4C3/H2AC6/H3C2/H4-16/H4C15/H2BC11/H4C1/H4C13/H2BC17/H2AC8/H2BC8/H3C11/H2AC4/H2BC13/MBD3/H3C1/H3C13/H4C8/H3C10/H3C12/H3C6
REACTOME_RNA_POLYMERASE_I_TRANSCRIPTION	REACTOME_RNA_POLYMERASE_I_TRANSCRIPTION	REACTOME_RNA_POLYMERASE_I_TRANSCRIPTION	55	-0.613131	-3.27313	1e-10	1.8e-08	1.52e-08	1367	tags=56%, list=16%, signal=47%	H4C5/POLR1E/ERCC2/H4C2/H2BC5/MTA1/POLR2L/H2AC14/H4C3/H2AC6/H3C2/H4-16/TAF1C/H4C15/H2BC11/H4C1/H4C13/H2BC17/H2AC8/H2BC8/H3C11/H2AC4/H2BC13/POLR2E/MBD3/H3C1/H3C13/H4C8/H3C10/H3C12/H3C6
REACTOME_ASSEMBLY_OF_THE_ORC_COMPLEX_AT_THE_ORIGIN_OF_REPLICATION	REACTOME_ASSEMBLY_OF_THE_ORC_COMPLEX_AT_THE_ORIGIN_OF_REPLICATION	REACTOME_ASSEMBLY_OF_THE_ORC_COMPLEX_AT_THE_ORIGIN_OF_REPLICATION	38	-0.667972	-3.2648	1e-10	1.8e-08	1.52e-08	735	tags=61%, list=9%, signal=55%	H4C2/H2BC5/H2AC14/H4C3/H2AC6/H3C2/H4-16/H4C15/H2BC11/H4C1/H4C13/H2BC17/H2AC8/H2BC8/H3C11/H2AC4/H2BC13/H3C1/H3C13/H4C8/H3C10/H3C12/H3C6
REACTOME_RNA_POLYMERASE_I_PROMOTER_ESCAPE	REACTOME_RNA_POLYMERASE_I_PROMOTER_ESCAPE	REACTOME_RNA_POLYMERASE_I_PROMOTER_ESCAPE	48	-0.635005	-3.26206	1e-10	1.8e-08	1.52e-08	1367	tags=60%, list=16%, signal=51%	H4C5/POLR1E/ERCC2/H4C2/H2BC5/POLR2L/H2AC14/H4C3/H2AC6/H3C2/H4-16/TAF1C/H4C15/H2BC11/H4C1/H4C13/H2BC17/H2AC8/H2BC8/H3C11/H2AC4/H2BC13/POLR2E/H3C1/H3C13/H4C8/H3C10/H3C12/H3C6
REACTOME_PRC2_METHYLATES_HISTONES_AND_DNA	REACTOME_PRC2_METHYLATES_HISTONES_AND_DNA	REACTOME_PRC2_METHYLATES_HISTONES_AND_DNA	42	-0.652613	-3.24882	1e-10	1.8e-08	1.52e-08	735	tags=64%, list=9%, signal=59%	DNMT3A/H4C5/H4C2/H2BC5/H2AC14/DNMT1/H4C3/H2AC6/H3C2/H4-16/H4C15/H2BC11/H4C1/H4C13/H2BC17/H2AC8/PHF19/H2BC8/H3C11/H2AC4/H2BC13/H3C1/H3C13/H4C8/H3C10/H3C12/H3C6
REACTOME_HCMV_EARLY_EVENTS	REACTOME_HCMV_EARLY_EVENTS	REACTOME_HCMV_EARLY_EVENTS	70	-0.575168	-3.23044	1e-10	1.8e-08	1.52e-08	2311	tags=71%, list=28%, signal=52%	DYNC1H1/TRIM28/H4C11/H2AC20/H4C12/H2BC21/NCOR2/TUBA1A/NUP93/NUP85/H3C14/NUP62/NUP188/HDAC3/TUBB2A/H4C5/NUP210/TUBB3/H4C2/H2BC5/H2AC17/H2AC11/H2AC13/H2AC14/H2AC21/H4C3/H2AC15/H2AC6/H3C2/H4-16/TUBA1B/H4C15/H2BC11/H4C1/H4C13/TUBB4B/H2BC17/H2AC8/H2BC8/H2BC18/H3C11/H2AC4/H2BC13/H2AC16/H3C1/H3C13/H4C8/H3C10/H3C12/H3C6
REACTOME_CONDENSATION_OF_PROPHASE_CHROMOSOMES	REACTOME_CONDENSATION_OF_PROPHASE_CHROMOSOMES	REACTOME_CONDENSATION_OF_PROPHASE_CHROMOSOMES	41	-0.652879	-3.22677	1e-10	1.8e-08	1.52e-08	735	tags=54%, list=9%, signal=49%	H2AC14/H4C3/H2AC6/H3C2/H4-16/H4C15/H2BC11/H4C1/H4C13/H2BC17/H2AC8/H2BC8/NCAPH2/H3C11/H2AC4/H2BC13/H3C1/H3C13/H4C8/H3C10/H3C12/H3C6
REACTOME_NEGATIVE_EPIGENETIC_REGULATION_OF_RRNA_EXPRESSION	REACTOME_NEGATIVE_EPIGENETIC_REGULATION_OF_RRNA_EXPRESSION	REACTOME_NEGATIVE_EPIGENETIC_REGULATION_OF_RRNA_EXPRESSION	53	-0.60845	-3.22527	1e-10	1.8e-08	1.52e-08	1367	tags=57%, list=16%, signal=48%	H4C5/POLR1E/ERCC2/H4C2/H2BC5/POLR2L/H2AC14/DNMT1/H4C3/H2AC6/H3C2/H4-16/TAF1C/H4C15/H2BC11/H4C1/H4C13/H2BC17/H2AC8/H2BC8/H3C11/H2AC4/H2BC13/POLR2E/H3C1/H3C13/H4C8/H3C10/H3C12/H3C6
REACTOME_PRE_NOTCH_EXPRESSION_AND_PROCESSING	REACTOME_PRE_NOTCH_EXPRESSION_AND_PROCESSING	REACTOME_PRE_NOTCH_EXPRESSION_AND_PROCESSING	58	-0.598033	-3.21864	1e-10	1.8e-08	1.52e-08	1115	tags=52%, list=13%, signal=45%	ATP2A3/H4C2/H2BC5/H2AC14/H4C3/MOV10/H2AC6/H3C2/H4-16/MAMLD1/H4C15/ST3GAL4/H2BC11/H4C1/H4C13/H2BC17/H2AC8/E2F1/SIRT6/H2BC8/LFNG/H3C11/H2AC4/H2BC13/H3C1/H3C13/H4C8/H3C10/H3C12/H3C6
REACTOME_HCMV_INFECTION	REACTOME_HCMV_INFECTION	REACTOME_HCMV_INFECTION	85	-0.545787	-3.21191	1e-10	1.8e-08	1.52e-08	2311	tags=68%, list=28%, signal=50%	DYNC1H1/TRIM28/CHMP3/VPS4A/H4C11/H2AC20/H4C12/MVB12A/H2BC21/NCOR2/TUBA1A/VPS37C/NUP93/NUP85/H3C14/NUP62/NUP188/HDAC3/TUBB2A/H4C5/NUP210/CHMP6/TUBB3/H4C2/VPS37B/H2BC5/H2AC17/H2AC11/H2AC13/H2AC14/H2AC21/H4C3/H2AC15/H2AC6/H3C2/H4-16/TUBA1B/H4C15/H2BC11/H4C1/CHMP1A/H4C13/TUBB4B/H2BC17/H2AC8/H2BC8/H2BC18/VPS28/H3C11/H2AC4/H2BC13/H2AC16/H3C1/H3C13/H4C8/H3C10/H3C12/H3C6
REACTOME_POSITIVE_EPIGENETIC_REGULATION_OF_RRNA_EXPRESSION	REACTOME_POSITIVE_EPIGENETIC_REGULATION_OF_RRNA_EXPRESSION	REACTOME_POSITIVE_EPIGENETIC_REGULATION_OF_RRNA_EXPRESSION	55	-0.597694	-3.19072	1e-10	1.8e-08	1.52e-08	1114	tags=78%, list=13%, signal=68%	H4C14/H2AX/H2AZ1/CHD4/POLR2F/POLR1A/H4C11/H2AC20/MTA2/H4C12/H2BC21/H3C14/ACTB/H4C5/POLR1E/H4C2/H2BC5/MTA1/POLR2L/H2AC14/H4C3/H2AC6/H3C2/H4-16/TAF1C/H4C15/H2BC11/H4C1/H4C13/H2BC17/H2AC8/H2BC8/H3C11/H2AC4/H2BC13/POLR2E/MBD3/H3C1/H3C13/H4C8/H3C10/H3C12/H3C6
REACTOME_B_WICH_COMPLEX_POSITIVELY_REGULATES_RRNA_EXPRESSION	REACTOME_B_WICH_COMPLEX_POSITIVELY_REGULATES_RRNA_EXPRESSION	REACTOME_B_WICH_COMPLEX_POSITIVELY_REGULATES_RRNA_EXPRESSION	49	-0.617291	-3.1861	1e-10	1.8e-08	1.52e-08	753	tags=49%, list=9%, signal=45%	POLR2L/H2AC14/H4C3/H2AC6/H3C2/H4-16/TAF1C/H4C15/H2BC11/H4C1/H4C13/H2BC17/H2AC8/H2BC8/H3C11/H2AC4/H2BC13/POLR2E/H3C1/H3C13/H4C8/H3C10/H3C12/H3C6
GOCC_DNA_PACKAGING_COMPLEX	GOCC_DNA_PACKAGING_COMPLEX	GOCC_DNA_PACKAGING_COMPLEX	74	-0.556273	-3.18203	1e-10	1.8e-08	1.52e-08	1122	tags=49%, list=13%, signal=42%	H1-4/H4C2/H2BC5/SPHK2/H2AC17/H2AC11/H2AC13/H2AC21/H4C3/H2AC15/H2AC6/H1-2/H3C2/H1-3/H4-16/H4C15/H2BC11/H1-10/H4C1/H4C13/H2BC17/H2AC8/H2BC8/H2BC18/NCAPH2/H3C11/H2AC4/H2BC13/H2AC16/H1-5/H3C1/H3C13/H4C8/H3C10/H3C12/H3C6
REACTOME_HATS_ACETYLATE_HISTONES	REACTOME_HATS_ACETYLATE_HISTONES	REACTOME_HATS_ACETYLATE_HISTONES	73	-0.558725	-3.17372	1e-10	1.8e-08	1.52e-08	1114	tags=45%, list=13%, signal=40%	H4C2/H2BC5/ELP5/H2AC17/H2AC11/TAF6L/H2AC13/H2AC14/H2AC21/H4C3/H2AC15/H2AC6/H3C2/H4-16/H4C15/H2BC11/H4C1/H4C13/H2BC17/H2AC8/MCRS1/H2BC8/H2BC18/H3C11/H2AC4/H2BC13/H2AC16/H3C1/H3C13/H4C8/H3C10/H3C12/H3C6
REACTOME_RUNX1_REGULATES_GENES_INVOLVED_IN_MEGAKARYOCYTE_DIFFERENTIATION_AND_PLATELET_FUNCTION	REACTOME_RUNX1_REGULATES_GENES_INVOLVED_IN_MEGAKARYOCYTE_DIFFERENTIATION_AND_PLATELET_FUNCTION	REACTOME_RUNX1_REGULATES_GENES_INVOLVED_IN_MEGAKARYOCYTE_DIFFERENTIATION_AND_PLATELET_FUNCTION	46	-0.625808	-3.16102	1e-10	1.8e-08	1.52e-08	1114	tags=54%, list=13%, signal=47%	H4C2/H2BC5/PRMT1/H2AC14/H4C3/MOV10/H2AC6/H3C2/H4-16/H4C15/H2BC11/H4C1/H4C13/H2BC17/H2AC8/H2BC8/H3C11/H2AC4/H2BC13/H3C1/H3C13/H4C8/H3C10/H3C12/H3C6
REACTOME_TRANSCRIPTIONAL_REGULATION_BY_SMALL_RNAS	REACTOME_TRANSCRIPTIONAL_REGULATION_BY_SMALL_RNAS	REACTOME_TRANSCRIPTIONAL_REGULATION_BY_SMALL_RNAS	54	-0.592979	-3.15963	1e-10	1.8e-08	1.52e-08	2610	tags=78%, list=31%, signal=54%	H4C14/H2AX/NUP133/H2AZ1/POLR2F/H4C11/H2AC20/H4C12/H2BC21/NUP93/NUP85/H3C14/NUP62/NUP188/POLR2G/H4C5/NUP210/H4C2/H2BC5/POLR2L/H2AC14/H4C3/H2AC6/H3C2/H4-16/H4C15/H2BC11/H4C1/H4C13/H2BC17/H2AC8/H2BC8/H3C11/H2AC4/H2BC13/POLR2E/H3C1/H3C13/H4C8/H3C10/H3C12/H3C6
REACTOME_FORMATION_OF_THE_BETA_CATENIN_TCF_TRANSACTIVATING_COMPLEX	REACTOME_FORMATION_OF_THE_BETA_CATENIN_TCF_TRANSACTIVATING_COMPLEX	REACTOME_FORMATION_OF_THE_BETA_CATENIN_TCF_TRANSACTIVATING_COMPLEX	51	-0.600712	-3.15334	1e-10	1.8e-08	1.52e-08	1114	tags=57%, list=13%, signal=50%	TLE3/H4C5/H4C2/SMARCA4/H2BC5/PYGO2/H2AC14/H4C3/H2AC6/H3C2/H4-16/H4C15/H2BC11/H4C1/H4C13/H2BC17/H2AC8/H2BC8/TERT/H3C11/H2AC4/H2BC13/H3C1/H3C13/H4C8/H3C10/TLE2/H3C12/H3C6
GINESTIER_BREAST_CANCER_ZNF217_AMPLIFIED_DN	GINESTIER_BREAST_CANCER_ZNF217_AMPLIFIED_DN	GINESTIER_BREAST_CANCER_ZNF217_AMPLIFIED_DN	179	-0.463091	-3.14418	1e-10	1.8e-08	1.52e-08	3064	tags=72%, list=37%, signal=47%	ARPC5L/SYMPK/GBA2/DPH7/PUS1/SCAF1/RNPS1/ZNF646/CC2D1B/C7orf26/SNRNP70/SH3BP5L/SNAPC4/RBM10/DDX11/DAGLB/KMT2D/RTKN/MEF2D/ZNF598/SUV39H1/CUL9/HIP1R/XPO5/LEMD2/SLC23A2/PDXP/MYO9B/NPM3/EIF3B/RPL18/TEPSIN/GGA1/POLR2F/RBM15B/ZNF358/ZNF133/SH3BP2/CFAP410/DRG2/EPN1/TEAD3/SMG5/AMPD2/ZNF316/ANKRD13D/CIC/LIMK2/VARS1/HSF4/ZNF524/GIGYF1/PPRC1/GRAMD4/TSPAN14/NUP62/MOGS/RCC1/AP5Z1/FBRSL1/CALR/L3MBTL2/RANGAP1/AR…
REACTOME_EPIGENETIC_REGULATION_OF_GENE_EXPRESSION	REACTOME_EPIGENETIC_REGULATION_OF_GENE_EXPRESSION	REACTOME_EPIGENETIC_REGULATION_OF_GENE_EXPRESSION	69	-0.560489	-3.13566	1e-10	1.8e-08	1.52e-08	1385	tags=51%, list=17%, signal=43%	DNMT3A/H4C5/POLR1E/ERCC2/H4C2/H2BC5/MTA1/POLR2L/H2AC14/DNMT1/H4C3/H2AC6/H3C2/H4-16/TAF1C/H4C15/H2BC11/H4C1/H4C13/H2BC17/H2AC8/PHF19/H2BC8/UHRF1/H3C11/H2AC4/H2BC13/POLR2E/MBD3/H3C1/H3C13/H4C8/H3C10/H3C12/H3C6
REACTOME_DISEASES_OF_PROGRAMMED_CELL_DEATH	REACTOME_DISEASES_OF_PROGRAMMED_CELL_DEATH	REACTOME_DISEASES_OF_PROGRAMMED_CELL_DEATH	55	-0.580793	-3.1005	1e-10	1.8e-08	1.52e-08	1385	tags=78%, list=17%, signal=66%	H4C14/PRDX1/H2AX/H2AZ1/CASP8/H4C11/H2AC20/CDK5/H4C12/H2BC21/CDC25A/CAPN1/H3C14/DNMT3A/H4C5/FADD/H4C2/H2BC5/TRAF2/H2AC14/DNMT1/H4C3/H2AC6/H3C2/H4-16/H4C15/H2BC11/H4C1/H4C13/H2BC17/H2AC8/PRDX2/CAPN2/H2BC8/H3C11/H2AC4/H2BC13/H3C1/H3C13/H4C8/H3C10/H3C12/H3C6
REACTOME_DNA_REPLICATION	REACTOME_DNA_REPLICATION	REACTOME_DNA_REPLICATION	93	-0.514281	-3.09165	1e-10	1.8e-08	1.52e-08	1645	tags=52%, list=20%, signal=42%	FEN1/H3C14/POLD2/POLE4/PSMB1/UBA52/H4C5/MCM3/ANAPC2/MCM5/H4C2/SKP2/MCM6/GINS3/H2BC5/PSMB5/POLE/GINS2/RBX1/H2AC14/MCM7/H4C3/E2F2/H2AC6/H3C2/PSMA7/H4-16/MCM2/H4C15/H2BC11/H4C1/H4C13/FZR1/H2BC17/H2AC8/E2F1/H2BC8/POLD1/H3C11/ANAPC11/H2AC4/H2BC13/H3C1/H3C13/H4C8/H3C10/H3C12/H3C6
REACTOME_TRANSCRIPTIONAL_REGULATION_OF_GRANULOPOIESIS	REACTOME_TRANSCRIPTIONAL_REGULATION_OF_GRANULOPOIESIS	REACTOME_TRANSCRIPTIONAL_REGULATION_OF_GRANULOPOIESIS	52	-0.579982	-3.07471	1e-10	1.8e-08	1.52e-08	1114	tags=50%, list=13%, signal=44%	H4C2/RXRA/H2BC5/H2AC14/H4C3/H2AC6/H3C2/H4-16/H4C15/H2BC11/H4C1/H4C13/H2BC17/H2AC8/CDK4/E2F1/H2BC8/H3C11/H2AC4/H2BC13/H3C1/H3C13/H4C8/H3C10/H3C12/H3C6
GOBP_DNA_REPLICATION_DEPENDENT_CHROMATIN_ORGANIZATION	GOBP_DNA_REPLICATION_DEPENDENT_CHROMATIN_ORGANIZATION	GOBP_DNA_REPLICATION_DEPENDENT_CHROMATIN_ORGANIZATION	21	-0.751943	-3.06233	1.58e-10	2.55e-08	2.15e-08	645	tags=67%, list=8%, signal=62%	H4C3/CHAF1A/H3C2/H4-16/H4C15/H4C1/H4C13/ASF1B/H3C11/H3C1/H4C8/H3C10/H3C12/H3C6
REACTOME_MEIOTIC_RECOMBINATION	REACTOME_MEIOTIC_RECOMBINATION	REACTOME_MEIOTIC_RECOMBINATION	47	-0.597726	-3.0458	1e-10	1.8e-08	1.52e-08	735	tags=47%, list=9%, signal=43%	H2AC14/H4C3/H2AC6/H3C2/H4-16/H4C15/H2BC11/H4C1/H4C13/H2BC17/H2AC8/CDK4/H2BC8/H3C11/H2AC4/H2BC13/H3C1/H3C13/H4C8/H3C10/H3C12/H3C6
REACTOME_DNA_REPLICATION_PRE_INITIATION	REACTOME_DNA_REPLICATION_PRE_INITIATION	REACTOME_DNA_REPLICATION_PRE_INITIATION	72	-0.536783	-3.03694	1e-10	1.8e-08	1.52e-08	1394	tags=50%, list=17%, signal=42%	PSMB1/UBA52/H4C5/MCM3/MCM5/H4C2/MCM6/H2BC5/PSMB5/POLE/H2AC14/MCM7/H4C3/E2F2/H2AC6/H3C2/PSMA7/H4-16/MCM2/H4C15/H2BC11/H4C1/H4C13/H2BC17/H2AC8/E2F1/H2BC8/H3C11/H2AC4/H2BC13/H3C1/H3C13/H4C8/H3C10/H3C12/H3C6
REACTOME_SENESCENCE_ASSOCIATED_SECRETORY_PHENOTYPE_SASP	REACTOME_SENESCENCE_ASSOCIATED_SECRETORY_PHENOTYPE_SASP	REACTOME_SENESCENCE_ASSOCIATED_SECRETORY_PHENOTYPE_SASP	60	-0.557369	-3.0178	1e-10	1.8e-08	1.52e-08	1386	tags=52%, list=17%, signal=43%	UBA52/H4C5/ANAPC2/H4C2/H2BC5/EHMT1/RPS6KA2/H2AC14/H4C3/H2AC6/H3C2/H4-16/H4C15/H2BC11/H4C1/H4C13/FZR1/H2BC17/H2AC8/CDK4/H2BC8/H3C11/ANAPC11/H2AC4/H2BC13/H3C1/H3C13/H4C8/H3C10/H3C12/H3C6
GOBP_NUCLEOSOME_ASSEMBLY	GOBP_NUCLEOSOME_ASSEMBLY	GOBP_NUCLEOSOME_ASSEMBLY	58	-0.560693	-3.01768	1e-10	1.8e-08	1.52e-08	1122	tags=50%, list=13%, signal=44%	H1-4/H4C2/H2BC5/GRWD1/H4C3/CHAF1A/H1-2/H3C2/H1-3/H4-16/MCM2/H4C15/H2BC11/H1-10/H4C1/H4C13/H2BC17/ASF1B/H2BC8/H2BC18/H3C11/H2BC13/H1-5/H3C1/H3C13/H4C8/H3C10/H3C12/H3C6
MARTENS_TRETINOIN_RESPONSE_DN	MARTENS_TRETINOIN_RESPONSE_DN	MARTENS_TRETINOIN_RESPONSE_DN	385	-0.385293	-2.96667	1e-10	1.8e-08	1.52e-08	2911	tags=61%, list=35%, signal=42%	COX7C/SOX12/SNX22/FAM89B/TMEM138/PPP1R3F/ACAT2/CRAMP1/ZNF629/MRPL40/ACD/RPL13A/HOMER3/ZNF598/ABT1/NT5C/RPL36/DHPS/FARSA/SLC1A5/TGIF1/SNRPE/PRSS53/ATRAID/H2AX/ENTR1/NEIL1/ARVCF/HAGHL/TIMM8B/WFIKKN1/PRDX5/RFESD/NPM3/HPDL/BABAM1/CYB561D2/RPL18/RPS6KB2/ORAI1/METRN/MORN1/TSSK6/TFAP4/KLF1/RBM15B/TRIM28/CAND2/MRPL57/MRPS16/ZNF628/RRP7BP/ZNF513/ERAL1/RNH1/PGLS/ARRDC1-AS1/ATP5MC3/HIGD2A/SYNGR2/TSPOAP1/SEP…
REACTOME_RHO_GTPASES_ACTIVATE_PKNS	REACTOME_RHO_GTPASES_ACTIVATE_PKNS	REACTOME_RHO_GTPASES_ACTIVATE_PKNS	49	-0.574607	-2.96579	7.15e-10	1.03e-07	8.67e-08	1114	tags=51%, list=13%, signal=44%	H4C2/PKN3/H2BC5/H2AC14/H4C3/H2AC6/H3C2/H4-16/H4C15/H2BC11/H4C1/H4C13/H2BC17/H2AC8/PKN1/H2BC8/H3C11/H2AC4/H2BC13/H3C1/H3C13/H4C8/H3C10/H3C12/H3C6
GOCC_PROTEIN_DNA_COMPLEX	GOCC_PROTEIN_DNA_COMPLEX	GOCC_PROTEIN_DNA_COMPLEX	111	-0.473615	-2.95417	1e-10	1.8e-08	1.52e-08	1369	tags=43%, list=16%, signal=37%	BRF1/H4C5/MCM3/MCM5/H1-4/H4C2/MCM6/GINS3/H2BC5/SPHK2/H2AC17/H2AC11/ZBTB17/GINS2/H2AC13/MCM7/H2AC21/H4C3/H2AC15/H2AC6/H1-2/H3C2/H1-3/H4-16/MCM2/H4C15/H2BC11/H1-10/H4C1/H4C13/H2BC17/H2AC8/H2BC8/H2BC18/POLD1/TERT/H3C11/H2AC4/H2BC13/H2AC16/WDR18/H1-5/H3C1/H3C13/H4C8/H3C10/H3C12/H3C6
KIM_ALL_DISORDERS_OLIGODENDROCYTE_NUMBER_CORR_UP	KIM_ALL_DISORDERS_OLIGODENDROCYTE_NUMBER_CORR_UP	KIM_ALL_DISORDERS_OLIGODENDROCYTE_NUMBER_CORR_UP	394	-0.381934	-2.94865	1e-10	1.8e-08	1.52e-08	2893	tags=61%, list=35%, signal=42%	GABARAP/GPR162/FAM89B/PSMD2/CTSH/PEBP1/KBTBD11/ATOX1/HAGH/MDH1/MRPL40/ACD/PISD/HADHB/ANXA6/PMVK/PGK1/STOML1/NRGN/COX5B/DHPS/FARSA/LGMN/TRAPPC12/GAPDH/MAST3/AP3M2/RUSC2/CORO2B/SNRPE/ATP6V1B2/SNN/TAF6/UBA1/FIG4/BAP1/PRDX1/WSB2/CLSTN1/RNF4/GOT2/PEF1/SCAP/PSMB4/PMM1/RNF41/DCTN2/TKT/SERPINF1/RASSF2/ADRM1/ECHS1/DYNC1H1/TALDO1/TRIM28/HRAS/TRAP1/EIF6/FAU/PRR36/ATP6AP1/PFKP/AMFR/RNH1/RTL8C/SPTAN1/RUVBL2/G…
REACTOME_HDMS_DEMETHYLATE_HISTONES	REACTOME_HDMS_DEMETHYLATE_HISTONES	REACTOME_HDMS_DEMETHYLATE_HISTONES	28	-0.656269	-2.91586	4.33e-09	4.98e-07	4.19e-07	645	tags=50%, list=8%, signal=46%	H4C3/H3C2/H4-16/H4C15/H4C1/H4C13/KDM4B/H3C11/H3C1/H3C13/H4C8/H3C10/H3C12/H3C6
REACTOME_ESTROGEN_DEPENDENT_GENE_EXPRESSION	REACTOME_ESTROGEN_DEPENDENT_GENE_EXPRESSION	REACTOME_ESTROGEN_DEPENDENT_GENE_EXPRESSION	82	-0.496078	-2.91339	1.06e-10	1.85e-08	1.55e-08	1382	tags=45%, list=17%, signal=38%	KANK1/TLE3/H4C5/USF2/AXIN1/H4C2/H2BC5/PRMT1/POLR2L/H2AC14/CTSD/H4C3/CXXC5/MOV10/H2AC6/H3C2/H4-16/CITED1/H4C15/H2BC11/H4C1/H4C13/KDM4B/H2BC17/H2AC8/CARM1/H2BC8/H3C11/H2AC4/H2BC13/POLR2E/H3C1/H3C13/H4C8/H3C10/H3C12/H3C6
IBRAHIM_NRF2_DOWN	IBRAHIM_NRF2_DOWN	IBRAHIM_NRF2_DOWN	108	-0.466828	-2.90754	1e-10	1.8e-08	1.52e-08	1360	tags=49%, list=16%, signal=42%	NBEAL2/TRPT1/ENGASE/RECQL4/COMTD1/TUBGCP6/PPP1R16A/KLHL17/PKN3/FJX1/TONSL/CTDSP1/PBXIP1/ACTR1B/MAMDC4/LRRC45/SIVA1/PPP1R35/VIM-AS1/MFSD3/AMDHD2/SEMA4C/TRAF1/CHTF18/TYK2/MOV10/VIM/SGSM2/SAPCD2/H2AC6/PHLDB2/ENC1/SEMA6C/METTL26/H4C15/ACAP3/H1-10/CYHR1/NME3/WDR90/RHOT2/RASSF7/SLC2A8/OGDHL/PIGQ/LINC02381/RHPN1/HMG20B/ABCA7/PAQR4/TK1/DPP7/RAB26
REACTOME_RUNX1_REGULATES_TRANSCRIPTION_OF_GENES_INVOLVED_IN_DIFFERENTIATION_OF_HSCS	REACTOME_RUNX1_REGULATES_TRANSCRIPTION_OF_GENES_INVOLVED_IN_DIFFERENTIATION_OF_HSCS	REACTOME_RUNX1_REGULATES_TRANSCRIPTION_OF_GENES_INVOLVED_IN_DIFFERENTIATION_OF_HSCS	61	-0.53501	-2.90741	4.85e-10	7.49e-08	6.3e-08	1426	tags=51%, list=17%, signal=42%	TP73/PSMB1/UBA52/H4C5/H4C2/H2BC5/PSMB5/ABL1/H2AC14/H4C3/H2AC6/H3C2/PSMA7/H4-16/H4C15/H2BC11/H4C1/H4C13/H2BC17/H2AC8/H2BC8/H3C11/TCF3/H2AC4/H2BC13/H3C1/H3C13/H4C8/H3C10/H3C12/H3C6
REACTOME_GENE_SILENCING_BY_RNA	REACTOME_GENE_SILENCING_BY_RNA	REACTOME_GENE_SILENCING_BY_RNA	65	-0.52272	-2.89826	9e-10	1.27e-07	1.06e-07	1805	tags=71%, list=22%, signal=56%	H4C14/H2AX/ELAC2/NUP133/H2AZ1/POLR2F/H4C11/H2AC20/H4C12/H2BC21/NUP93/NUP85/DGCR8/H3C14/NUP62/NUP188/POLR2G/H4C5/TARBP2/NUP210/MIR23B/H4C2/H2BC5/POLR2L/H2AC14/H4C3/H2AC6/H3C2/H4-16/H4C15/H2BC11/H4C1/H4C13/H2BC17/H2AC8/H2BC8/H3C11/H2AC4/H2BC13/POLR2E/H3C1/H3C13/H4C8/H3C10/H3C12/H3C6
NIKOLSKY_BREAST_CANCER_8Q23_Q24_AMPLICON	NIKOLSKY_BREAST_CANCER_8Q23_Q24_AMPLICON	NIKOLSKY_BREAST_CANCER_8Q23_Q24_AMPLICON	72	-0.51217	-2.89769	1.44e-10	2.39e-08	2.01e-08	1919	tags=62%, list=23%, signal=49%	LY6E/GRINA/KIFC2/LYNX1/ZNF250/TRAPPC9/C8orf33/C8orf82/SHARPIN/NAPRT/ZNF517/MAF1/EXOSC4/RECQL4/PYCR3/NRBP2/ST3GAL1/SCRIB/PPP1R16A/TONSL/CPSF1/HSF1/EEF1D/BOP1/ADCK5/TSNARE1/MFSD3/OPLAH/SLC45A4/CYC1/PTP4A3/LRRC14/SLC52A2/ARHGAP39/COMMD5/FBXL6/JRK/CYHR1/TIGD5/PUF60/RHPN1/THEM6/VPS28/LRRC24/GPAA1
KIM_ALL_DISORDERS_DURATION_CORR_DN	KIM_ALL_DISORDERS_DURATION_CORR_DN	KIM_ALL_DISORDERS_DURATION_CORR_DN	85	-0.490195	-2.88476	1e-10	1.8e-08	1.52e-08	2934	tags=75%, list=35%, signal=49%	RBM10/COX7C/ATOX1/ACD/STOML1/NRGN/DHPS/TRAPPC12/MAST3/PEF1/PMM1/DCTN2/TALDO1/HRAS/TRAP1/EIF6/ATP6AP1/RNH1/RUVBL2/GRHPR/NDUFC1/AMPD2/EIF3G/ACOT7/HCFC1R1/NUP93/NIPSNAP1/NBL1/NDUFAF3/NDUFS8/DHX30/SLC25A11/ATP6V0B/SNRPA/SUMO3/COX8A/ESYT1/TPI1/PSMB5/MARCKSL1/COL9A3/NSG2/ACTR1A/UQCRQ/CDIPT/TMEM147/PAFAH1B3/AKR1B1/RPL13/KLHL21/AKR1A1/ENDOG/NTHL1/MRPL23/ECSIT/GPX1/PUF60/ECI1/RPS29/VPS28/VPS51/CKB/PIN1/ND…
REACTOME_ACTIVATION_OF_ANTERIOR_HOX_GENES_IN_HINDBRAIN_DEVELOPMENT_DURING_EARLY_EMBRYOGENESIS	REACTOME_ACTIVATION_OF_ANTERIOR_HOX_GENES_IN_HINDBRAIN_DEVELOPMENT_DURING_EARLY_EMBRYOGENESIS	REACTOME_ACTIVATION_OF_ANTERIOR_HOX_GENES_IN_HINDBRAIN_DEVELOPMENT_DURING_EARLY_EMBRYOGENESIS	61	-0.529013	-2.87482	1.24e-09	1.72e-07	1.44e-07	2610	tags=75%, list=31%, signal=52%	H4C14/H2AX/H2AZ1/AJUBA/POLR2F/CNOT9/H4C11/RARG/RARA/H2AC20/H4C12/H2BC21/WDR5/H3C14/POLR2G/HDAC3/PAGR1/PBX1/H4C5/H4C2/RXRA/H2BC5/MEIS1/POLR2L/H2AC14/H4C3/H2AC6/H3C2/H4-16/H4C15/H2BC11/H4C1/H4C13/H2BC17/H2AC8/H2BC8/H3C11/H2AC4/H2BC13/POLR2E/H3C1/H3C13/H4C8/H3C10/H3C12/H3C6
REACTOME_OXIDATIVE_STRESS_INDUCED_SENESCENCE	REACTOME_OXIDATIVE_STRESS_INDUCED_SENESCENCE	REACTOME_OXIDATIVE_STRESS_INDUCED_SENESCENCE	69	-0.511458	-2.86135	5.27e-10	8.03e-08	6.75e-08	877	tags=48%, list=11%, signal=43%	CBX6/UBA52/H4C5/H4C2/H2BC5/MAPK11/MAP2K7/H2AC14/H4C3/MOV10/E2F2/H2AC6/H3C2/H4-16/H4C15/PHC2/H2BC11/H4C1/H4C13/H2BC17/H2AC8/CDK4/E2F1/H2BC8/H3C11/H2AC4/H2BC13/H3C1/H3C13/H4C8/H3C10/H3C12/H3C6
REACTOME_MEIOSIS	REACTOME_MEIOSIS	REACTOME_MEIOSIS	63	-0.520012	-2.84629	3e-09	3.64e-07	3.06e-07	735	tags=37%, list=9%, signal=34%	H2AC14/H4C3/REC8/H2AC6/H3C2/H4-16/H4C15/H2BC11/H4C1/H4C13/H2BC17/H2AC8/CDK4/H2BC8/H3C11/H2AC4/H2BC13/H3C1/H3C13/H4C8/H3C10/H3C12/H3C6
REACTOME_AMYLOID_FIBER_FORMATION	REACTOME_AMYLOID_FIBER_FORMATION	REACTOME_AMYLOID_FIBER_FORMATION	51	-0.541281	-2.84137	1.08e-08	1.14e-06	9.56e-07	735	tags=47%, list=9%, signal=43%	H2AC14/H4C3/H2AC6/H3C2/TSPAN15/H4-16/H4C15/H2BC11/APH1A/H4C1/H4C13/H2BC17/H2AC8/PRL/H2BC8/H3C11/H2AC4/H2BC13/H3C1/H3C13/H4C8/H3C10/H3C12/H3C6
KEGG_SYSTEMIC_LUPUS_ERYTHEMATOSUS	KEGG_SYSTEMIC_LUPUS_ERYTHEMATOSUS	KEGG_SYSTEMIC_LUPUS_ERYTHEMATOSUS	63	-0.517356	-2.83175	3.91e-09	4.61e-07	3.87e-07	1114	tags=49%, list=13%, signal=43%	H4C2/H2BC5/H2AC17/H2AC11/H2AC13/H2AC14/H2AC21/H4C3/H2AC15/H2AC6/H3C2/H4-16/H4C15/H2BC11/H4C1/H4C13/H2BC17/H2AC8/SNRPB/H2BC8/H2BC18/H3C11/H2AC4/H2BC13/H2AC16/H3C1/H3C13/H4C8/H3C10/H3C12/H3C6
REACTOME_CHROMATIN_MODIFYING_ENZYMES	REACTOME_CHROMATIN_MODIFYING_ENZYMES	REACTOME_CHROMATIN_MODIFYING_ENZYMES	124	-0.442344	-2.82164	1e-10	1.8e-08	1.52e-08	1163	tags=40%, list=14%, signal=35%	ACTB/HDAC3/DNMT3A/DOT1L/H4C5/WDR77/H4C2/SMARCA4/H2BC5/ELP5/EHMT1/MTA1/KMT5C/H2AC17/PRMT1/H2AC11/TAF6L/H2AC13/H2AC14/H2AC21/H4C3/H2AC15/H2AC6/H3C2/H4-16/H4C15/H2BC11/H4C1/H4C13/KDM4B/H2BC17/H2AC8/CDK4/MCRS1/CARM1/H2BC8/H2BC18/HMG20B/H3C11/H2AC4/H2BC13/H2AC16/MBD3/H3C1/H3C13/H4C8/H3C10/H3C12/H3C6
REACTOME_TCF_DEPENDENT_SIGNALING_IN_RESPONSE_TO_WNT	REACTOME_TCF_DEPENDENT_SIGNALING_IN_RESPONSE_TO_WNT	REACTOME_TCF_DEPENDENT_SIGNALING_IN_RESPONSE_TO_WNT	106	-0.453657	-2.81698	1.03e-10	1.82e-08	1.53e-08	1394	tags=43%, list=17%, signal=37%	PSMB1/UBA52/TLE3/H4C5/PPP2R5B/AKT2/AXIN1/H4C2/SMARCA4/H2BC5/PSMB5/PYGO2/CTNNBIP1/AKT1/RBX1/H2AC14/KREMEN1/H4C3/CTBP1/H2AC6/H3C2/PSMA7/H4-16/LRP5/H4C15/H2BC11/PPP2R1A/H4C1/H4C13/H2BC17/H2AC8/FZD8/DVL1/H2BC8/TERT/H3C11/H2AC4/CSNK1G2/H2BC13/H3C1/H3C13/H4C8/H3C10/TLE2/H3C12/H3C6
GOBP_NUCLEOSOME_ORGANIZATION	GOBP_NUCLEOSOME_ORGANIZATION	GOBP_NUCLEOSOME_ORGANIZATION	76	-0.486864	-2.79746	1.3e-09	1.77e-07	1.48e-07	1122	tags=41%, list=13%, signal=36%	H1-4/H4C2/SMARCA4/H2BC5/GRWD1/H4C3/CHAF1A/H1-2/H3C2/H1-3/H4-16/MCM2/H4C15/H2BC11/H1-10/H4C1/H4C13/H2BC17/ASF1B/MCRS1/H2BC8/H2BC18/H3C11/H2BC13/H1-5/H3C1/H3C13/H4C8/H3C10/H3C12/H3C6
REACTOME_MITOTIC_PROPHASE	REACTOME_MITOTIC_PROPHASE	REACTOME_MITOTIC_PROPHASE	69	-0.499593	-2.79497	2.29e-09	2.82e-07	2.36e-07	2614	tags=67%, list=31%, signal=46%	LEMD2/H4C14/GORASP1/H2AX/NUP133/H2AZ1/NCAPD3/H4C11/H2AC20/H4C12/H2BC21/NUP93/NUP85/H3C14/NUP62/NUP188/VRK1/PPP2R1B/H4C5/NUP210/RAB1B/H4C2/H2BC5/H2AC14/H4C3/H2AC6/H3C2/H4-16/H4C15/H2BC11/PPP2R1A/H4C1/H4C13/H2BC17/H2AC8/H2BC8/NCAPH2/H3C11/H2AC4/H2BC13/H3C1/H3C13/H4C8/H3C10/H3C12/H3C6
SANSOM_APC_MYC_TARGETS	SANSOM_APC_MYC_TARGETS	SANSOM_APC_MYC_TARGETS	109	-0.445254	-2.78255	1.25e-10	2.11e-08	1.77e-08	2466	tags=58%, list=30%, signal=41%	PMM1/TRAPPC6A/MTHFD1/TKT/SMPD4/POFUT1/USP20/CFAP410/TP53RK/USF1/SHMT1/BCL2L1/RRP9/VARS1/NFIC/FAM83G/MAPK7/NUBP2/DDX49/ABCC10/DENND6B/WDR4/TUBB2A/NBEAL2/SLC35B2/MCM3/VIPR1/NHP2/NDST1/ABCB8/ATP2A3/KPTN/PKN3/CTDSP2/INTS1/SF3B5/YJU2/SIVA1/POLE/SLC6A6/RAD23A/PTPRS/MCM7/OPLAH/MED22/GTPBP3/COLGALT1/SAPCD2/NPTX2/NTMT1/CITED1/PIAS4/TMEM141/QTRT1/SCAMP4/C20orf27/DHCR24/LFNG/MVK/VPS51/LMNB2/THOP1/TELO2
SANSOM_APC_TARGETS_REQUIRE_MYC	SANSOM_APC_TARGETS_REQUIRE_MYC	SANSOM_APC_TARGETS_REQUIRE_MYC	126	-0.432546	-2.76918	1e-10	1.8e-08	1.52e-08	2260	tags=56%, list=27%, signal=41%	POLR1A/SETD4/SMPD4/EMC8/POFUT1/USP20/PPP1R14B/DRG2/SLC29A2/TP53RK/SHMT1/RRP9/GTSE1/MFSD13A/VARS1/LRP8/RGS12/RNASEH2A/PDXK/MUS81/NSUN5/WDR54/MAPK7/AAR2/DDX49/DENND6B/WDR4/TUBB2A/EPHB2/NBEAL2/SLC35B2/TRMT9B/MCM3/BID/PTOV1/DTYMK/NHP2/TRMT61A/FBL/GRWD1/DUS3L/YJU2/FADS2/SIVA1/POLE/GINS2/RAD23A/D2HGDH/MCM7/CAD/MED22/GTPBP3/TRIM9/SAPCD2/NTMT1/CITED1/TMEM141/QTRT1/CDK4/BCL11B/GIPC1/LFNG/MVK/PCBP4/LMNB2/T…
REACTOME_REPRODUCTION	REACTOME_REPRODUCTION	REACTOME_REPRODUCTION	67	-0.495985	-2.76272	2.15e-09	2.68e-07	2.25e-07	735	tags=34%, list=9%, signal=32%	H2AC14/H4C3/REC8/H2AC6/H3C2/H4-16/H4C15/H2BC11/H4C1/H4C13/H2BC17/H2AC8/CDK4/H2BC8/H3C11/H2AC4/H2BC13/H3C1/H3C13/H4C8/H3C10/H3C12/H3C6
LU_EZH2_TARGETS_UP	LU_EZH2_TARGETS_UP	LU_EZH2_TARGETS_UP	149	-0.415025	-2.75962	1e-10	1.8e-08	1.52e-08	3034	tags=68%, list=36%, signal=44%	UQCR10/DDIT4/RGS19/PCNX3/LPCAT1/PARD6A/FAM219B/ATOX1/ZNF629/MAPKAPK3/SERF2/PMVK/RPS19BP1/RPL36/TRAPPC12/AZIN2/RARRES2/PDXP/HAGHL/TRIOBP/CYB561D2/RPS6KB2/GFOD2/ZNF133/TOR3A/H2AC20/PPP1R14B/CCDC107/PRSS23/SNHG11/OXLD1/PRDX4/RPLP0P6/HBQ1/HCFC1R1/MICAL2/TRIM16L/NAA38/ISG15/LAMTOR4/PCK2/ECHDC3/WDR54/C8orf82/HSD11B1L/RCC1L/PAGR1/SHARPIN/MKNK2/WDR83/MGMT/TRAPPC5/MEX3D/PIH1D1/GCHFR/GANAB/NUDCD3/NENF/PITX…
REACTOME_BASE_EXCISION_REPAIR	REACTOME_BASE_EXCISION_REPAIR	REACTOME_BASE_EXCISION_REPAIR	52	-0.516159	-2.73636	3.42e-08	3.16e-06	2.66e-06	2819	tags=73%, list=34%, signal=49%	ACD/SMUG1/NEIL2/RFC2/H4C14/H2AX/NEIL1/H2AZ1/H4C11/H2AC20/H4C12/H2BC21/PNKP/FEN1/POLD2/POLE4/H4C5/UNG/H4C2/MPG/H2BC5/POLE/H2AC14/H4C3/H2AC6/H4-16/NTHL1/H4C15/H2BC11/H4C1/H4C13/H2BC17/H2AC8/H2BC8/POLD1/H2AC4/H2BC13/H4C8
WELCSH_BRCA1_TARGETS_DN	WELCSH_BRCA1_TARGETS_DN	WELCSH_BRCA1_TARGETS_DN	76	-0.47564	-2.73296	4.17e-09	4.85e-07	4.08e-07	2968	tags=70%, list=36%, signal=45%	SNRNP70/MYC/NSDHL/DDX11/FARSA/SLC1A5/CDC37/FKBP4/SCAP/CHD4/EIF3B/MTHFD1/HRAS/FGFR3/TRAP1/AP3D1/GTF3C2/RRP1B/CTPS1/MRPS12/MOGS/NUP188/RCC1/PPM1F/FASN/SCRIB/SMARCA4/MGST1/RXRA/HSF1/BOP1/CYC1/CAD/USP5/H4C3/UBL4A/CHAF1A/BYSL/SLC19A1/TAF1C/AGPAT2/MCM2/H1-10/NME3/GALK1/RASSF7/CCDC85B/CDK4/DHCR24/PKN1/POLD1/LMNB2/POLRMT
REACTOME_BASE_EXCISION_REPAIR_AP_SITE_FORMATION	REACTOME_BASE_EXCISION_REPAIR_AP_SITE_FORMATION	REACTOME_BASE_EXCISION_REPAIR_AP_SITE_FORMATION	38	-0.558985	-2.73211	2.31e-07	1.84e-05	1.55e-05	2819	tags=82%, list=34%, signal=54%	ACD/SMUG1/NEIL2/H4C14/H2AX/NEIL1/H2AZ1/H4C11/H2AC20/H4C12/H2BC21/H4C5/UNG/H4C2/MPG/H2BC5/H2AC14/H4C3/H2AC6/H4-16/NTHL1/H4C15/H2BC11/H4C1/H4C13/H2BC17/H2AC8/H2BC8/H2AC4/H2BC13/H4C8
SHEDDEN_LUNG_CANCER_GOOD_SURVIVAL_A5	SHEDDEN_LUNG_CANCER_GOOD_SURVIVAL_A5	SHEDDEN_LUNG_CANCER_GOOD_SURVIVAL_A5	42	-0.54837	-2.72988	7.11e-08	6.16e-06	5.18e-06	1451	tags=60%, list=17%, signal=49%	MKNK2/ARID3A/KLHL26/ZNF562/XAB2/AP1M2/ZSCAN18/SEZ6L2/SHC2/ZNF443/SMARCA4/EFS/SLC25A23/RTN2/DCAF15/ADGRL1/PLPPR2/FZR1/KDM4B/ARHGEF18/CERS4/EPOR/GNA11/RANBP3/TLE2
RICKMAN_METASTASIS_DN	RICKMAN_METASTASIS_DN	RICKMAN_METASTASIS_DN	120	-0.427528	-2.72106	2.71e-10	4.32e-08	3.63e-08	1537	tags=43%, list=18%, signal=36%	MIR210/PPP2R1B/MTUS1/MKNK2/HELZ2/GAS2L1/ADAM15/MOB3A/MPDU1/ST6GALNAC4/LMF2/RXRA/TRIR/BCR/VASP/MAPK11/MAP2K7/MIER2/ZDHHC12/AGAP3/MRPL4/SEMA3F/SH3GLB2/ATG4D/MAPK12/DUSP7/R3HDM4/ENDOG/GET3/DNM2/SLC19A1/DAPK3/BTBD2/SH3GL1/FZR1/ATP5F1D/GUK1/KEAP1/TNPO2/CARM1/IGSF3/RNF126/DOCK8/GIPC1/TMEM259/CACTIN/BSG/BAIAP2/THOP1/ABHD17A/POLR2E/MAP2K2
SPIELMAN_LYMPHOBLAST_EUROPEAN_VS_ASIAN_UP	SPIELMAN_LYMPHOBLAST_EUROPEAN_VS_ASIAN_UP	SPIELMAN_LYMPHOBLAST_EUROPEAN_VS_ASIAN_UP	239	-0.378259	-2.70975	1e-10	1.8e-08	1.52e-08	2233	tags=47%, list=27%, signal=36%	WRAP73/FAU/PGLS/ATP5MC3/CDK5/ATP5MC2/DECR2/PSMB3/MBOAT7/WWP2/NAGLU/CD2BP2/TUBA1A/PHKA2/IVD/RPL39/ACOT7/RPLP2/RGS20/PPAN/OAZ1/RRP7A/TOMM40/PCK2/TGIF2/NDUFS8/RALY/PNPLA6/VRK1/CNPPD1/NDUFA3/ZNF212/ARID3A/DAZAP1/TUBB2A/KHSRP/ICMT/DUS1L/GCHFR/NME4/PARK7/NENF/CNPY3/RECQL4/ELOB/RREB1/RRP1/RAB1B/UCP2/MZF1/TECR/SMARCA4/RXRA/H2BC5/MTA1/DOK1/PSMB5/MARCKSL1/ACTG1/SCAND1/VASP/AP1B1/GSS/B3GAT3/CCNF/POLE/APBA3/…
WP_EFFECT_OF_PROGERIN_ON_GENES_INVOLVED_IN_HUTCHINSONGILFORD_PROGERIA_SYNDROME	WP_EFFECT_OF_PROGERIN_ON_GENES_INVOLVED_IN_HUTCHINSONGILFORD_PROGERIA_SYNDROME	WP_EFFECT_OF_PROGERIN_ON_GENES_INVOLVED_IN_HUTCHINSONGILFORD_PROGERIA_SYNDROME	20	-0.679358	-2.69976	6.1e-07	4.15e-05	3.49e-05	517	tags=50%, list=6%, signal=47%	H3C2/SREBF1/E2F1/H3C11/MBD3/H3C1/H3C13/H3C10/H3C12/H3C6
REACTOME_CELLULAR_SENESCENCE	REACTOME_CELLULAR_SENESCENCE	REACTOME_CELLULAR_SENESCENCE	107	-0.432409	-2.68509	1.9e-09	2.42e-07	2.03e-07	1668	tags=43%, list=20%, signal=35%	CABIN1/H3C14/CBX2/MAPK7/CBX6/UBA52/H4C5/ANAPC2/H1-4/H4C2/H2BC5/EHMT1/RPS6KA2/MAPK11/MAP2K7/H2AC14/H4C3/MOV10/E2F2/H2AC6/H1-2/H3C2/H1-3/H4-16/H4C15/PHC2/H2BC11/H4C1/H4C13/FZR1/H2BC17/H2AC8/CDK4/E2F1/H2BC8/H3C11/ANAPC11/H2AC4/H2BC13/H1-5/H3C1/H3C13/H4C8/H3C10/H3C12/H3C6
REACTOME_DEPOSITION_OF_NEW_CENPA_CONTAINING_NUCLEOSOMES_AT_THE_CENTROMERE	REACTOME_DEPOSITION_OF_NEW_CENPA_CONTAINING_NUCLEOSOMES_AT_THE_CENTROMERE	REACTOME_DEPOSITION_OF_NEW_CENPA_CONTAINING_NUCLEOSOMES_AT_THE_CENTROMERE	37	-0.556707	-2.67958	5.03e-07	3.51e-05	2.95e-05	1114	tags=49%, list=13%, signal=42%	H4C2/H2BC5/H2AC14/H4C3/H2AC6/CENPM/CENPX/H4-16/H4C15/H2BC11/H4C1/H4C13/H2BC17/H2AC8/H2BC8/H2AC4/H2BC13/H4C8
REACTOME_PKMTS_METHYLATE_HISTONE_LYSINES	REACTOME_PKMTS_METHYLATE_HISTONE_LYSINES	REACTOME_PKMTS_METHYLATE_HISTONE_LYSINES	35	-0.56466	-2.67068	2.25e-07	1.81e-05	1.52e-05	1673	tags=57%, list=20%, signal=46%	WDR5/H3C14/DOT1L/H4C5/H4C2/EHMT1/KMT5C/H4C3/H3C2/H4-16/H4C15/H4C1/H4C13/H3C11/H3C1/H3C13/H4C8/H3C10/H3C12/H3C6
REACTOME_RECOGNITION_AND_ASSOCIATION_OF_DNA_GLYCOSYLASE_WITH_SITE_CONTAINING_AN_AFFECTED_PURINE	REACTOME_RECOGNITION_AND_ASSOCIATION_OF_DNA_GLYCOSYLASE_WITH_SITE_CONTAINING_AN_AFFECTED_PURINE	REACTOME_RECOGNITION_AND_ASSOCIATION_OF_DNA_GLYCOSYLASE_WITH_SITE_CONTAINING_AN_AFFECTED_PURINE	33	-0.570233	-2.66852	4.9e-07	3.47e-05	2.92e-05	1114	tags=52%, list=13%, signal=45%	H4C2/MPG/H2BC5/H2AC14/H4C3/H2AC6/H4-16/H4C15/H2BC11/H4C1/H4C13/H2BC17/H2AC8/H2BC8/H2AC4/H2BC13/H4C8
LIN_APC_TARGETS	LIN_APC_TARGETS	LIN_APC_TARGETS	43	-0.532178	-2.6673	3.39e-07	2.55e-05	2.14e-05	2783	tags=74%, list=33%, signal=50%	ARHGDIA/SLC1A5/UBA1/CTDSPL/SCAP/FLOT2/GNA12/LY6E/RPL39L/CAPN1/ACTN4/EIF5A/NOP53/PRKCSH/HDAC3/CPSF4/ABCC1/SLC35B2/SYK/RAB1B/NSMF/MAP3K11/TPRA1/MTA1/DOK1/ADRA2C/AGRN/GIPC1/HMG20B/TLE5/TELO2/POLR2E
MOOTHA_HUMAN_MITODB_6_2002	MOOTHA_HUMAN_MITODB_6_2002	MOOTHA_HUMAN_MITODB_6_2002	187	-0.388351	-2.65558	1e-10	1.8e-08	1.52e-08	2565	tags=54%, list=31%, signal=38%	ATP7B/STARD3/CYBA/TIMM8B/GOT2/MRPS2/CASP8/MTHFD1/BCAT2/TST/GCAT/LYPLA2/MRPS28/BCKDK/ECHS1/MIPEP/PRDX3/TRAP1/MRPL57/MRPS16/EMC8/PCCB/UQCR11/ATP5MC3/HADH/NDUFC1/AIFM1/ATP5MC2/TIMM22/AFG3L2/SCP2/MDH2/CBARP/SHMT1/BCL2L1/UQCRH/IVD/TXN/RPLP2/TIMM44/NDUFAB1/FH/MRPS12/NDUFB2/TOMM40/PCK2/FARS2/NDUFS8/SLC25A1/NDUFA3/SLC25A11/RPL3/BID/NME4/ME3/MRPS7/ABCB8/COX8A/PPIF/DLST/UCP2/LMF2/ATP5F1E/SLC25A10/BDH1/DNAS…
BLANCO_MELO_INFLUENZA_A_INFECTION_A594_CELLS_DN	BLANCO_MELO_INFLUENZA_A_INFECTION_A594_CELLS_DN	BLANCO_MELO_INFLUENZA_A_INFECTION_A594_CELLS_DN	71	-0.470039	-2.64253	4.13e-08	3.73e-06	3.13e-06	2754	tags=68%, list=33%, signal=46%	MAFG-DT/MAFK/RPL36/SLC35E2B/NUDT3/NOTCH3/FAM20C/ZNF696/IFI27L2/SLC16A13/LMF1/KLHDC8B/KIAA0895L/CACFD1/ORAI2/RPL39/ZNF446/GIGYF1/SLC39A1/PCK2/C11orf68/SPDEF/NDUFA3/ZNHIT2/ENGASE/ZNF428/MZF1/MESP1/TONSL/STUB1/REXO1/CPLX2/TYSND1/SPATA2L/ELFN2/OPLAH/SLC25A29/SPC24/KIF12/COL27A1/ST3GAL2/OPN3/REX1BD/PIGQ/ZNF687/TBC1D16/MEGF6/WDR18
LI_DCP2_BOUND_MRNA	LI_DCP2_BOUND_MRNA	LI_DCP2_BOUND_MRNA	57	-0.489843	-2.6267	3.59e-07	2.65e-05	2.23e-05	2006	tags=65%, list=24%, signal=50%	NAA10/TST/NARF/RUVBL2/SCO2/HMOX2/EIF3G/RPSA/APEH/PDXK/MRPS12/NOP53/NT5DC2/NDUFS8/TRAPPC2L/CUEDC2/BID/DUS1L/EXOSC4/ELOB/HSD17B10/NQO2/EEF1D/POLR2L/APRT/CYC1/RPS5/UQCRC1/CHAF1A/AP2S1/DEAF1/MRPL23/MRPL12/UBXN6/NDUFB7/NDUFS7/MAP2K2
GOBP_PROTEIN_DNA_COMPLEX_ASSEMBLY	GOBP_PROTEIN_DNA_COMPLEX_ASSEMBLY	GOBP_PROTEIN_DNA_COMPLEX_ASSEMBLY	96	-0.431391	-2.6143	1.35e-08	1.4e-06	1.17e-06	1369	tags=40%, list=16%, signal=33%	BRF1/H4C5/POLR1E/PIH1D1/CENPV/H1-4/H4C2/SMARCA4/H2BC5/GRWD1/TAF6L/H4C3/CHAF1A/H1-2/H3C2/H1-3/CENPX/H4-16/TAF1C/MCM2/H4C15/H2BC11/H1-10/H4C1/H4C13/H2BC17/ASF1B/H2BC8/H2BC18/H3C11/H2BC13/H1-5/H3C1/H3C13/H4C8/H3C10/H3C12/H3C6
GOBP_DNA_PACKAGING	GOBP_DNA_PACKAGING	GOBP_DNA_PACKAGING	118	-0.411707	-2.60352	3.38e-09	4.02e-07	3.38e-07	662	tags=34%, list=8%, signal=32%	CENPV/AXIN1/H1-4/H4C2/H2BC5/SAMD1/GRWD1/DNMT1/H4C3/CTBP1/CHAF1A/H1-2/ATF7IP2/H3C2/H1-3/H4-16/MCM2/H4C15/H2BC11/H1-10/H4C1/CHMP1A/H4C13/H2BC17/ASF1B/SIRT6/H2BC8/H2BC18/NCAPH2/H3C11/H2BC13/MBD3/H1-5/H3C1/TTN/H3C13/H4C8/H3C10/H3C12/H3C6
REACTOME_INHIBITION_OF_DNA_RECOMBINATION_AT_TELOMERE	REACTOME_INHIBITION_OF_DNA_RECOMBINATION_AT_TELOMERE	REACTOME_INHIBITION_OF_DNA_RECOMBINATION_AT_TELOMERE	40	-0.528862	-2.58964	9.56e-07	6.09e-05	5.11e-05	2610	tags=70%, list=31%, signal=48%	H4C14/H2AX/H2AZ1/POLR2F/H4C11/H2AC20/H4C12/H2BC21/POLR2G/H4C5/H4C2/H2BC5/POLR2L/H2AC14/H4C3/H2AC6/H4-16/H4C15/H2BC11/H4C1/H4C13/H2BC17/H2AC8/H2BC8/H2AC4/H2BC13/POLR2E/H4C8
REACTOME_DNA_REPAIR	REACTOME_DNA_REPAIR	REACTOME_DNA_REPAIR	155	-0.385767	-2.58793	6.02e-10	8.81e-08	7.4e-08	1713	tags=39%, list=21%, signal=32%	SPIDR/PNKP/MUS81/ISG15/FEN1/POLD2/POLE4/POLR2G/ACTB/POLL/TOP3A/ACTR5/UBA52/H4C5/MGMT/EME2/XAB2/SUMO3/UNG/ERCC2/VCP/MAD2L2/H4C2/MPG/H2BC5/POLE/FANCC/RAD23A/ABL1/POLR2L/RBX1/H2AC14/DDB1/H4C3/GPS1/PPP4C/H2AC6/FANCG/FANCA/CENPX/H4-16/NTHL1/FAAP20/PIAS4/H4C15/H2BC11/H4C1/H4C13/KDM4B/H2BC17/H2AC8/MCRS1/SIRT6/FAAP100/H2BC8/POLD1/XRCC3/H2AC4/H2BC13/POLR2E/H4C8
REACTOME_TRANSCRIPTIONAL_REGULATION_BY_RUNX1	REACTOME_TRANSCRIPTIONAL_REGULATION_BY_RUNX1	REACTOME_TRANSCRIPTIONAL_REGULATION_BY_RUNX1	99	-0.423486	-2.58675	2.65e-08	2.5e-06	2.1e-06	1427	tags=39%, list=17%, signal=33%	CBX6/TP73/PSMB1/UBA52/H4C5/AXIN1/H4C2/SMARCA4/H2BC5/PSMB5/PRMT1/CCND3/ABL1/H2AC14/H4C3/MOV10/H2AC6/H3C2/PSMA7/H4-16/H4C15/PHC2/H2BC11/H4C1/H4C13/H2BC17/H2AC8/H2BC8/H3C11/TCF3/H2AC4/H2BC13/CLDN5/H3C1/H3C13/H4C8/H3C10/H3C12/H3C6
WP_HISTONE_MODIFICATIONS	WP_HISTONE_MODIFICATIONS	WP_HISTONE_MODIFICATIONS	34	-0.549658	-2.57146	2.79e-06	0.000157323	0.00013214	1375	tags=50%, list=16%, signal=42%	DOT1L/H4C5/H4C2/EHMT1/KMT5C/H4C3/H3C2/H4-16/H4C1/H4C13/H3C11/H3C1/H3C13/H4C8/H3C10/H3C12/H3C6
NIKOLSKY_BREAST_CANCER_16Q24_AMPLICON	NIKOLSKY_BREAST_CANCER_16Q24_AMPLICON	NIKOLSKY_BREAST_CANCER_16Q24_AMPLICON	33	-0.549	-2.56916	2.52e-06	0.000143461	0.000120497	3558	tags=94%, list=43%, signal=54%	GAS8/SPIRE2/ZFPM1/COX4I1/CDT1/CTU2/KLHDC4/PABPN1L/MVD/CYBA/TCF25/ACSF3/EMC8/CDK10/DBNDD1/TRAPPC2L/RNF166/VPS9D1/TUBB3/CPNE7/GALNS/JPH3/ZNF276/GINS2/SPATA2L/APRT/C16orf74/FANCA/RPL13/DEF8/CHMP1A
VERHAAK_GLIOBLASTOMA_CLASSICAL	VERHAAK_GLIOBLASTOMA_CLASSICAL	VERHAAK_GLIOBLASTOMA_CLASSICAL	83	-0.43529	-2.56615	1.06e-07	8.8e-06	7.39e-06	2298	tags=59%, list=28%, signal=43%	IRF3/FGFR3/ADAM19/HS3ST3B1/POFUT1/CLIP2/TEAD3/RBCK1/SARS2/POMT2/EXTL3/CC2D1A/RFX2/RGS12/ZNF446/TRIB2/FBXO17/TGIF2/RFXANK/RBM42/PEPD/CARMIL1/AKT2/ERCC2/KLHDC8A/MEGF8/WSCD1/NPEPL1/MEIS1/GAS1/APBA3/PLIN3/TMEM147/VPS16/R3HDM4/LRP5/QTRT1/BTBD2/KLHL4/PTPN14/SCAMP4/KEAP1/SNTA1/HMG20B/TMEM161A/LFNG/TMED1/CD151/TLE2
REACTOME_ESR_MEDIATED_SIGNALING	REACTOME_ESR_MEDIATED_SIGNALING	REACTOME_ESR_MEDIATED_SIGNALING	115	-0.404852	-2.55623	6.67e-09	7.29e-07	6.12e-07	1382	tags=37%, list=17%, signal=32%	KANK1/TLE3/H4C5/USF2/AKT2/AXIN1/H4C2/H2BC5/PRMT1/GNB3/AKT1/POLR2L/H2AC14/CTSD/H4C3/CXXC5/MOV10/GNG11/H2AC6/H3C2/H4-16/CITED1/H4C15/GNB5/H2BC11/H4C1/H4C13/KDM4B/H2BC17/H2AC8/SPHK1/CARM1/H2BC8/H3C11/H2AC4/H2BC13/POLR2E/H3C1/H3C13/H4C8/H3C10/H3C12/H3C6
SCHLOSSER_MYC_AND_SERUM_RESPONSE_SYNERGY	SCHLOSSER_MYC_AND_SERUM_RESPONSE_SYNERGY	SCHLOSSER_MYC_AND_SERUM_RESPONSE_SYNERGY	20	-0.641716	-2.55018	6.07e-06	0.000327003	0.000274659	1959	tags=75%, list=23%, signal=58%	LIMK2/MRPS12/TOMM40/KHSRP/NME4/SNRPA/MTA1/PYCR1/FPGS/MRPL12/CCDC85B/RNF126/ARMC6/SGTA/NCLN
FOSTER_KDM1A_TARGETS_DN	FOSTER_KDM1A_TARGETS_DN	FOSTER_KDM1A_TARGETS_DN	102	-0.416181	-2.54914	1.52e-08	1.54e-06	1.29e-06	2734	tags=63%, list=33%, signal=43%	ACOT8/RPP25L/POLA2/KRBA1/RARRES2/ELMO3/SNN/CELSR3/HAGHL/TRIOBP/POLDIP2/LZTR1/METRN/RTL6/GCAT/ECHS1/RARG/INTS11/PEX11A/PGLS/RUVBL2/DRG2/FAM110A/SCYL1/CPLX1/URAHP/QARS1/NADK/EVC/STRIP1/GTPBP2/VRK1/TUBGCP2/NAPRT/FASTK/AP2M1/IRF2BP1/ATP2A3/APLP1/NPEPL1/RDM1/CORO1A/AP1B1/GRK6/PTPA/NISCH/RAC3/R3HDM4/TMEM141/NME3/WDR90/GFPT2/KDM4B/SNX17/COTL1/B4GAT1/TRABD/ARG2/DIRAS1/GNA11/NDUFB11/BAIAP2/MZT2B/TK1
GOBP_CHROMATIN_ASSEMBLY_OR_DISASSEMBLY	GOBP_CHROMATIN_ASSEMBLY_OR_DISASSEMBLY	GOBP_CHROMATIN_ASSEMBLY_OR_DISASSEMBLY	110	-0.407264	-2.5438	1.91e-08	1.88e-06	1.58e-06	1195	tags=35%, list=14%, signal=30%	CENPV/AXIN1/H1-4/H4C2/SMARCA4/H2BC5/SAMD1/GRWD1/DNMT1/H4C3/CTBP1/CHAF1A/H1-2/ATF7IP2/H3C2/H1-3/H4-16/MCM2/H4C15/H2BC11/H1-10/H4C1/H4C13/H2BC17/ASF1B/SIRT6/H2BC8/H2BC18/H3C11/H2BC13/MBD3/H1-5/H3C1/H3C13/H4C8/H3C10/H3C12/H3C6
REACTOME_SIGNALING_BY_WNT	REACTOME_SIGNALING_BY_WNT	REACTOME_SIGNALING_BY_WNT	149	-0.381866	-2.53913	1.92e-09	2.42e-07	2.03e-07	1402	tags=38%, list=17%, signal=32%	GNGT1/AP2M1/PSMB1/UBA52/TLE3/H4C5/PPP2R5B/AKT2/AXIN1/H4C2/SCRIB/SMARCA4/H2BC5/PSMB5/PYGO2/CTNNBIP1/GNB3/ITPR3/AKT1/RBX1/H2AC14/KREMEN1/H4C3/MOV10/CTBP1/GNG11/H2AC6/RAC3/H3C2/PSMA7/AP2S1/H4-16/LRP5/H4C15/GNB5/H2BC11/PPP2R1A/H4C1/H4C13/H2BC17/H2AC8/FZD8/DVL1/H2BC8/TERT/TLE5/H3C11/H2AC4/CSNK1G2/H2BC13/H3C1/H3C13/H4C8/H3C10/TLE2/H3C12/H3C6
YAO_TEMPORAL_RESPONSE_TO_PROGESTERONE_CLUSTER_17	YAO_TEMPORAL_RESPONSE_TO_PROGESTERONE_CLUSTER_17	YAO_TEMPORAL_RESPONSE_TO_PROGESTERONE_CLUSTER_17	93	-0.422206	-2.53813	4.74e-08	4.24e-06	3.56e-06	2453	tags=58%, list=29%, signal=41%	NAA10/NR2F6/DCTN2/SRSF9/TALDO1/EXOC7/ARL3/DPP3/INPP5A/EIF4A3/SAE1/MDH2/MRPL36/MRPS34/RPN2/AURKAIP1/NDUFAB1/MRPS12/C8orf82/LAMTOR1/ACTB/POLR3K/PTDSS1/MRPS7/COPE/STUB1/CENPB/GSTP1/MARCKSL1/TMEM109/YJU2/TMEM160/EVL/TWF2/AKT1/PC/PHB2/HMBS/UQCRQ/DDOST/UBL4A/TUBB/PSMA7/DOHH/CDK4/PUF60/CAPN2/LSM4/NDUFA11/ROMO1/CKB/NDUFB7/TIMM13/LSM7
MOOTHA_MITOCHONDRIA	MOOTHA_MITOCHONDRIA	MOOTHA_MITOCHONDRIA	196	-0.36846	-2.53611	1e-10	1.8e-08	1.52e-08	2517	tags=53%, list=30%, signal=38%	CYBA/GRB10/TIMM8B/GOT2/DDX28/MRPS2/ATPAF2/MCAT/CASP8/MTHFD1/BCAT2/TST/LYPLA2/MRPS28/FAM3A/BCKDK/ECHS1/MIPEP/PRDX3/MRPL57/MRPS16/EMC8/PCCB/UQCR11/ATP5MC3/CFAP410/HADH/NDUFC1/AIFM1/MTX2/ATP5MC2/ADCK2/TIMM22/AFG3L2/MDH2/CBARP/BCL2L1/UQCRH/HTRA2/IVD/POR/G6PD/TIMM44/NDUFAB1/FH/MRPS12/NDUFB2/TOMM40/PCK2/FARS2/NDUFS8/SLC25A1/NDUFA3/SLC25A11/BID/NME4/ME3/MRPS7/ABCB8/COX8A/UCP2/LMF2/ATP5F1E/SLC25A10/NT5M/…
REACTOME_DNA_DAMAGE_TELOMERE_STRESS_INDUCED_SENESCENCE	REACTOME_DNA_DAMAGE_TELOMERE_STRESS_INDUCED_SENESCENCE	REACTOME_DNA_DAMAGE_TELOMERE_STRESS_INDUCED_SENESCENCE	48	-0.492264	-2.52879	1.29e-06	7.99e-05	6.71e-05	2213	tags=58%, list=27%, signal=43%	H4C11/H2AC20/H4C12/H2BC21/HMGA2/CDK2/CABIN1/H4C5/H1-4/H4C2/H2BC5/H2AC14/H4C3/H2AC6/H1-2/H1-3/H4-16/H4C15/H2BC11/H4C1/H4C13/H2BC17/H2AC8/H2BC8/H2AC4/H2BC13/H1-5/H4C8
REACTOME_SIGNALING_BY_NOTCH	REACTOME_SIGNALING_BY_NOTCH	REACTOME_SIGNALING_BY_NOTCH	114	-0.401329	-2.5273	1.86e-08	1.85e-06	1.55e-06	2213	tags=52%, list=27%, signal=39%	H4C11/POFUT1/H2AC20/H4C12/H2BC21/PSMB3/WWP2/PSENEN/NCOR2/ARRB1/RFNG/NEURL1/HDAC4/DTX1/H3C14/HDAC3/PBX1/PSMB1/UBA52/TLE3/H4C5/ATP2A3/H4C2/H2BC5/DLL1/PSMB5/WWC1/AKT1/RBX1/H2AC14/H4C3/MOV10/H2AC6/H3C2/PSMA7/H4-16/MAMLD1/H4C15/ST3GAL4/H2BC11/APH1A/H4C1/H4C13/H2BC17/H2AC8/E2F1/SIRT6/H2BC8/LFNG/H3C11/H2AC4/H2BC13/H3C1/H3C13/H4C8/H3C10/TLE2/H3C12/H3C6
BARRIER_CANCER_RELAPSE_NORMAL_SAMPLE_DN	BARRIER_CANCER_RELAPSE_NORMAL_SAMPLE_DN	BARRIER_CANCER_RELAPSE_NORMAL_SAMPLE_DN	20	-0.635145	-2.52406	8.07e-06	0.000410294	0.000344617	2177	tags=80%, list=26%, signal=59%	SPTAN1/ATG4B/VPS37C/CDK10/TLE6/GNB1L/CNPY3/NSMF/BCR/CPSF1/INTS1/STK25/TYK2/RHOT2/FAAP100/CSNK1G2
SATOH_COLORECTAL_CANCER_MYC_UP	SATOH_COLORECTAL_CANCER_MYC_UP	SATOH_COLORECTAL_CANCER_MYC_UP	36	-0.529315	-2.51886	6.96e-06	0.000362152	0.000304181	2017	tags=72%, list=24%, signal=55%	POLA2/SLC25A17/ADCY3/TST/AMPD2/ALDH1B1/CTPS1/POLD2/SLC12A9/POLR3K/SLCO4A1/POLR1E/UCKL1/DTYMK/PYCR3/PFAS/PFKM/POLR3H/AHCY/CAD/PYCR1/SLC19A1/SLC4A2/B4GALT2/CDK4/POLD1
GOCC_RIBOSOMAL_SUBUNIT	GOCC_RIBOSOMAL_SUBUNIT	GOCC_RIBOSOMAL_SUBUNIT	80	-0.430374	-2.50808	2.62e-07	2.04e-05	1.72e-05	2496	tags=56%, list=30%, signal=40%	MRPL52/MRPS2/MRPL55/RPL18/MRPS28/MRPL57/MRPS16/MRPL36/MRPS34/B3GALT4/RPL39/RPL39L/RPLP0P6/RPLP2/RPS12/RPSA/MPV17L2/MRPS12/ISG15/RPS9/RACK1/RPS21/RPS14/RPS19/RPL10/UBA52/RPL3/RPLP0/MRPS7/RPL29/MRPS26/RPL23A/RPL18A/MRPL4/MRPL28/RPS5/MRPL14/RPL13/MRPL41/MRPL23/MRPL12/RPS29/MRPL54/RPS15/RPS28
REACTOME_EUKARYOTIC_TRANSLATION_ELONGATION	REACTOME_EUKARYOTIC_TRANSLATION_ELONGATION	REACTOME_EUKARYOTIC_TRANSLATION_ELONGATION	42	-0.501411	-2.49611	3.18e-06	0.000178223	0.000149694	1869	tags=55%, list=22%, signal=43%	RPL39/RPL39L/RPLP2/RPS12/RPSA/RPS9/RPS21/RPS14/RPS19/RPL10/UBA52/RPL3/RPLP0/RPL29/RPL23A/EEF1D/RPL18A/RPS5/EEF2/RPL13/RPS29/RPS15/RPS28
GOCC_CYTOSOLIC_RIBOSOME	GOCC_CYTOSOLIC_RIBOSOME	GOCC_CYTOSOLIC_RIBOSOME	44	-0.493651	-2.47904	4.11e-06	0.000228398	0.000191837	1900	tags=55%, list=23%, signal=42%	B3GALT4/RPL39/RPL39L/RPLP0P6/RPLP2/RPS12/RPSA/ISG15/RPS9/RPS21/RPS14/RPS19/RPL10/UBA52/RPL3/RPLP0/RPL29/RPL23A/RPL18A/RPS5/RPL13/RPS29/RPS15/RPS28
MANALO_HYPOXIA_DN	MANALO_HYPOXIA_DN	MANALO_HYPOXIA_DN	133	-0.382722	-2.47799	1.24e-08	1.29e-06	1.09e-06	2977	tags=62%, list=36%, signal=41%	MRTO4/MCM10/ABCF2/MAP2K3/DDX11/ACAT2/SCLY/MRPL40/RFC2/POLA2/EXOSC2/FBXO42/SLC1A5/DGCR11/H2AX/NCAPD3/RITA1/NOL12/TRIP13/MTHFD1/PRMT7/TOR3A/TTLL4/DHX35/PKMYT1/RRP1B/TOE1/RRP9/POMT2/RPL39L/VARS1/LRP8/NUP85/CTPS1/MRPS12/FEN1/POLD2/NUP188/VRK1/TOP3A/POLR3K/WDR4/SLCO4A1/FASN/MCM3/MCM5/PFAS/WDR77/PPIF/RRP1/SKP2/MCM6/GINS3/ILF3/SLC25A10/GRWD1/CCNF/GINS2/BOP1/URB2/POLR2L/AMDHD2/LETM1/CAD/HMBS/NLE1/SLC5A6/…
GOBP_CHROMATIN_REMODELING	GOBP_CHROMATIN_REMODELING	GOBP_CHROMATIN_REMODELING	115	-0.391384	-2.4712	3.15e-08	2.94e-06	2.47e-06	1195	tags=33%, list=14%, signal=29%	CENPV/H1-4/H4C2/SMARCA4/H2BC5/GRWD1/MTA1/TAF6L/H4C3/CHAF1A/H1-2/H3C2/H1-3/H4-16/MCM2/H4C15/H2BC11/H1-10/H4C1/H4C13/KDM4B/H2BC17/ASF1B/MLLT1/MCRS1/H2BC8/H2BC18/MPND/H3C11/H2BC13/MBD3/H1-5/H3C1/H3C13/H4C8/H3C10/H3C12/H3C6
REACTOME_TELOMERE_MAINTENANCE	REACTOME_TELOMERE_MAINTENANCE	REACTOME_TELOMERE_MAINTENANCE	63	-0.450488	-2.46575	1.86e-06	0.00011085	9.31e-05	2704	tags=62%, list=32%, signal=42%	RFC2/POLA2/H4C14/H2AX/H2AZ1/POLR2F/H4C11/RUVBL2/H2AC20/H4C12/H2BC21/CDK2/PIF1/FEN1/POLD2/POLR2G/H4C5/NHP2/H4C2/H2BC5/POLR2L/H2AC14/CHTF18/H4C3/H2AC6/H4-16/H4C15/H2BC11/H4C1/H4C13/H2BC17/H2AC8/H2BC8/POLD1/TERT/H2AC4/H2BC13/POLR2E/H4C8
GOCC_CHROMOSOME_CENTROMERIC_CORE_DOMAIN	GOCC_CHROMOSOME_CENTROMERIC_CORE_DOMAIN	GOCC_CHROMOSOME_CENTROMERIC_CORE_DOMAIN	16	-0.656971	-2.45983	1.4e-05	0.000643148	0.000540198	1367	tags=94%, list=16%, signal=79%	H4C14/RCC2/H4C11/H4C12/H4C5/H4C2/H4C3/H4-16/H4C15/H2BC11/H4C1/H4C13/H2AC8/H2AC4/H4C8
GOMF_STRUCTURAL_CONSTITUENT_OF_RIBOSOME	GOMF_STRUCTURAL_CONSTITUENT_OF_RIBOSOME	GOMF_STRUCTURAL_CONSTITUENT_OF_RIBOSOME	74	-0.429319	-2.45582	7.33e-07	4.9e-05	4.11e-05	2496	tags=55%, list=30%, signal=39%	MRPL52/MRPS2/MRPL55/RPL18/MRPL57/MRPS16/MRPL36/MRPS34/RPL39/RPL39L/RPLP0P6/RPLP2/RPS12/RPSA/MRPS12/ISG15/RPS9/RPS21/RPS14/RNA5S9/RPS19/RPL10/UBA52/RPL3/RPLP0/MRPS7/RPL29/RPL23A/RPL18A/MRPL4/MRPL28/RPS5/MRPL14/RPL13/MRPL41/MRPL23/MRPL12/RPS29/MRPL54/RPS15/RPS28
WP_NUCLEOTIDE_EXCISION_REPAIR_IN_XERODERMA_PIGMENTOSUM	WP_NUCLEOTIDE_EXCISION_REPAIR_IN_XERODERMA_PIGMENTOSUM	WP_NUCLEOTIDE_EXCISION_REPAIR_IN_XERODERMA_PIGMENTOSUM	37	-0.506311	-2.43701	1.62e-05	0.000729577	0.000612792	1623	tags=51%, list=19%, signal=42%	POLD2/POLE4/H4C5/XAB2/ERCC2/H4C2/POLE/RAD23A/RBX1/DDB1/H4C3/GPS1/H2AC6/H4-16/H4C15/H4C1/H4C13/POLD1/H4C8
MILI_PSEUDOPODIA_HAPTOTAXIS_DN	MILI_PSEUDOPODIA_HAPTOTAXIS_DN	MILI_PSEUDOPODIA_HAPTOTAXIS_DN	342	-0.32255	-2.43203	1e-10	1.8e-08	1.52e-08	2692	tags=52%, list=32%, signal=37%	GGA2/PLEC/PIGO/SLC35F6/ATP13A1/RNF26/SLC39A13/SLC23A2/ADGRL2/GAA/SSH1/ATG16L1/CLSTN1/PLOD3/GOT2/PLAGL2/CST3/ZC3H4/SBF1/KIF22/CYB561D2/PTCH1/ORAI1/MFSD11/EXT2/POMGNT2/FAM3A/ZNF740/ADGRA3/CDS2/SLC16A13/PDIA5/STEAP3/CANT1/ATP6AP1/NCAM1/AP2A2/SLC39A14/ERGIC1/SYNGR2/SREBF2/TTLL4/CCDC107/NRM/PTTG1IP/PRSS23/MBOAT7/RNF121/NAGPA/PKMYT1/PHRF1/PTPRF/LY6E/THBS3/PRDX4/TNRC18/POMT2/QSOX1/CD276/VARS1/MFSD5/POR/…
DEBIASI_APOPTOSIS_BY_REOVIRUS_INFECTION_DN	DEBIASI_APOPTOSIS_BY_REOVIRUS_INFECTION_DN	DEBIASI_APOPTOSIS_BY_REOVIRUS_INFECTION_DN	163	-0.359669	-2.42532	2.51e-08	2.41e-06	2.02e-06	3022	tags=66%, list=36%, signal=43%	PLTP/ARHGEF17/OBSL1/MYC/VCAN/LPCAT1/MAP2K3/ARHGAP35/REEP2/RRBP1/MAPKAPK3/INSIG1/POLA2/GGA2/PLEC/TRAPPC12/GTF2I/SLC1A5/ATG2A/FIG4/ATP7B/ADCY3/NOTCH3/CLSTN1/MYO9B/CHD4/JCAD/SBF1/TCF25/FGFR3/GNAI2/GRHPR/NCDN/TSPOAP1/SPTBN2/PODXL/RIMS3/ABR/ENO2/FAM114A1/SCO2/IMPA2/SHMT1/PTPRF/NAGA/ALDH1B1/MARCHF2/MGAT5/DNAL4/CAPN1/POR/KHK/TRIM27/MBTPS1/DEPP1/DOP1B/PNPLA6/ABCC10/CD9/IFT27/KANK1/IDH1/EPHB2/GLB1/PPP2R5B…
GOBP_PROTEIN_DNA_COMPLEX_SUBUNIT_ORGANIZATION	GOBP_PROTEIN_DNA_COMPLEX_SUBUNIT_ORGANIZATION	GOBP_PROTEIN_DNA_COMPLEX_SUBUNIT_ORGANIZATION	113	-0.384483	-2.41699	2.68e-07	2.06e-05	1.73e-05	1431	tags=35%, list=17%, signal=30%	ACTR5/BRF1/H4C5/POLR1E/PIH1D1/CENPV/H1-4/H4C2/SMARCA4/H2BC5/GRWD1/TAF6L/H4C3/CHAF1A/H1-2/H3C2/H1-3/CENPX/H4-16/TAF1C/MCM2/H4C15/H2BC11/H1-10/H4C1/H4C13/H2BC17/ASF1B/MCRS1/H2BC8/H2BC18/H3C11/H2BC13/H1-5/H3C1/H3C13/H4C8/H3C10/H3C12/H3C6
ACOSTA_PROLIFERATION_INDEPENDENT_MYC_TARGETS_UP	ACOSTA_PROLIFERATION_INDEPENDENT_MYC_TARGETS_UP	ACOSTA_PROLIFERATION_INDEPENDENT_MYC_TARGETS_UP	52	-0.454862	-2.4114	6.4e-06	0.000336555	0.000282682	2024	tags=50%, list=24%, signal=38%	EIF4A3/RRP1B/MAST2/NRTN/CTPS1/CLUH/FBXO41/NUP210/DUSP9/SKP2/STUB1/UCK2/REPIN1/SLC17A7/PTK7/MRPL4/HDHD5/SORD/OPN3/DHCR7/GLB1L2/PEX5/TMEM161A/GCDH/MATK/CD320
WP_PYRIMIDINE_METABOLISM	WP_PYRIMIDINE_METABOLISM	WP_PYRIMIDINE_METABOLISM	40	-0.491979	-2.40904	1.49e-05	0.000673937	0.000566059	1696	tags=55%, list=20%, signal=44%	CTPS1/POLD2/POLE4/POLR2G/DCTD/POLR3K/POLR1E/UCKL1/NME4/DTYMK/NT5M/UCK2/POLR3H/POLE/POLR2L/CAD/UCK1/NME3/DCTPP1/POLD1/TK1/POLR2E
REACTOME_METALLOPROTEASE_DUBS	REACTOME_METALLOPROTEASE_DUBS	REACTOME_METALLOPROTEASE_DUBS	15	-0.659327	-2.408	2.7e-05	0.00111991	0.000940646	933	tags=73%, list=11%, signal=65%	UBA52/H2AC17/H2AC11/H2AC13/H2AC14/H2AC21/H2AC15/H2AC6/H2AC8/H2AC4/H2AC16
IRITANI_MAD1_TARGETS_DN	IRITANI_MAD1_TARGETS_DN	IRITANI_MAD1_TARGETS_DN	23	-0.575448	-2.40735	1.76e-05	0.000787366	0.000661331	1128	tags=52%, list=14%, signal=45%	FBL/MCM6/AHCY/CAD/SLC5A6/EEF2/UQCRC1/RPL13/METTL26/LONP1/DCTPP1/POLD1
GOCC_SMALL_RIBOSOMAL_SUBUNIT	GOCC_SMALL_RIBOSOMAL_SUBUNIT	GOCC_SMALL_RIBOSOMAL_SUBUNIT	31	-0.528315	-2.40379	1.39e-05	0.000642432	0.000539596	2435	tags=68%, list=29%, signal=48%	MRPS2/MRPS28/MRPS16/MRPS34/B3GALT4/RPS12/RPSA/MRPS12/ISG15/RPS9/RACK1/RPS21/RPS14/RPS19/UBA52/MRPS7/MRPS26/RPS5/RPS29/RPS15/RPS28
GOBP_DNA_CONFORMATION_CHANGE	GOBP_DNA_CONFORMATION_CHANGE	GOBP_DNA_CONFORMATION_CHANGE	165	-0.355529	-2.40269	1.08e-08	1.14e-06	9.56e-07	1203	tags=30%, list=14%, signal=26%	MCM5/RECQL4/CENPV/ERCC2/AXIN1/H1-4/H4C2/MCM6/GINS3/H2BC5/SAMD1/GRWD1/GINS2/ABL1/MCM7/CHTF18/DNMT1/H4C3/CTBP1/CHAF1A/H1-2/ATF7IP2/H3C2/H1-3/H4-16/MCM2/H4C15/H2BC11/H1-10/H4C1/CHMP1A/H4C13/H2BC17/ASF1B/SIRT6/H2BC8/H2BC18/NCAPH2/H3C11/H2BC13/MBD3/H1-5/H3C1/TTN/H3C13/H4C8/H3C10/H3C12/H3C6
WANG_RESPONSE_TO_GSK3_INHIBITOR_SB216763_DN	WANG_RESPONSE_TO_GSK3_INHIBITOR_SB216763_DN	WANG_RESPONSE_TO_GSK3_INHIBITOR_SB216763_DN	180	-0.350995	-2.39063	1.31e-09	1.77e-07	1.48e-07	2001	tags=59%, list=24%, signal=46%	MRTO4/MYC/MCM10/LPCAT1/CCM2/TGFBR1/CDC45/PHLDA1/ACAT2/RNF122/INSIG1/SUV39H1/SDF2L1/RFC2/EHD1/H2AX/H2AZ1/FKBP4/NCAPD3/APBB1/CTDSPL/JADE2/GINS4/TRIP13/MCAT/KIF22/PFKP/SLC39A14/EMP2/PKMYT1/CDK2/TCF19/CDC25A/ALDH1B1/TOE1/LY6E/FABP5/ARRB1/LRP8/LDLR/CTPS1/MRPS12/RRP7A/FEN1/ISYNA1/ATAD3B/CABLES1/WDR4/SLCO4A1/CASTOR2/FASN/MCM3/MAF1/PIH1D1/MOB3A/NHP2/EXOSC4/MCM5/PYCR3/CENPV/UNG/H1-4/H4C2/MCM6/GINS3/RNF144…
REACTOME_CHROMOSOME_MAINTENANCE	REACTOME_CHROMOSOME_MAINTENANCE	REACTOME_CHROMOSOME_MAINTENANCE	72	-0.421744	-2.38609	2.23e-06	0.000129194	0.000108514	2704	tags=58%, list=32%, signal=40%	RFC2/POLA2/H4C14/H2AX/H2AZ1/CENPO/POLR2F/H4C11/RUVBL2/H2AC20/H4C12/H2BC21/CDK2/PIF1/FEN1/POLD2/POLR2G/H4C5/NHP2/H4C2/H2BC5/POLR2L/H2AC14/CHTF18/H4C3/H2AC6/CENPM/CENPX/H4-16/H4C15/H2BC11/H4C1/H4C13/H2BC17/H2AC8/H2BC8/POLD1/TERT/H2AC4/H2BC13/POLR2E/H4C8
MANNE_COVID19_COMBINED_COHORT_VS_HEALTHY_DONOR_PLATELETS_UP	MANNE_COVID19_COMBINED_COHORT_VS_HEALTHY_DONOR_PLATELETS_UP	MANNE_COVID19_COMBINED_COHORT_VS_HEALTHY_DONOR_PLATELETS_UP	79	-0.410745	-2.38231	1.45e-06	8.93e-05	7.5e-05	2445	tags=58%, list=29%, signal=42%	SEC14L2/METRN/LYRM4/TPRN/NRSN2/KLF1/CERCAM/ARL3/GADD45G/EMID1/MVB12A/DECR2/ITPKC/NAGLU/LY6E/ACACA/KIFC2/SPATA20/POR/CLN6/NUDT14/ISG15/TGIF2/NDUFS8/MIIP/TSPAN17/PSPN/APLP1/RNF144A/ARL2/MAMDC4/UQCC3/ADCK5/PPP6R2/NPW/KREMEN1/HMBS/MAPK12/CASZ1/ASIC4/TSPAN4/MRPL12/FAM174C/LRP3/C4orf48/PCYT2
REACTOME_DNA_DOUBLE_STRAND_BREAK_RESPONSE	REACTOME_DNA_DOUBLE_STRAND_BREAK_RESPONSE	REACTOME_DNA_DOUBLE_STRAND_BREAK_RESPONSE	38	-0.486802	-2.37931	2.87e-05	0.00116783	0.000980892	2610	tags=66%, list=31%, signal=45%	H4C14/BAP1/H2AX/APBB1/BABAM1/H4C11/H4C12/H2BC21/UBA52/H4C5/H4C2/H2BC5/ABL1/H4C3/H4-16/PIAS4/H4C15/H2BC11/H4C1/H4C13/KDM4B/H2BC17/H2BC8/H2BC13/H4C8
BHAT_ESR1_TARGETS_VIA_AKT1_UP	BHAT_ESR1_TARGETS_VIA_AKT1_UP	BHAT_ESR1_TARGETS_VIA_AKT1_UP	149	-0.356146	-2.36812	6.06e-08	5.34e-06	4.48e-06	2567	tags=54%, list=31%, signal=38%	AKNA/ADCY3/FKBP4/JADE2/EIF3B/SEC14L2/LRIG1/KLC1/HPDL/UNC5A/GADD45G/CCM2L/RARA/LMO1/PODXL/SYNDIG1/NCOR2/TOE1/LHX4/SLC7A2/HDAC4/KHK/UNC119/GLA/PPRC1/BRD9/TOMM40/CLUH/FGFRL1/GADD45B/MED24/TGIF2/SCARB1/IER5L/PAK4/ADARB1/HPCAL1/QSOX2/RAB11FIP3/PITX1/RECQL4/AXIN1/CELSR2/PPIF/TRMT61A/FLAD1/RNF144A/MTFP1/DUSP2/AP1B1/GINS2/SLC6A6/WWC1/EFHD2/MCRIP2/MANEAL/MCM7/CTSD/CA12/LETM1/SBNO2/C16orf74/CXXC5/E2F2/NCS1…
YAO_TEMPORAL_RESPONSE_TO_PROGESTERONE_CLUSTER_12	YAO_TEMPORAL_RESPONSE_TO_PROGESTERONE_CLUSTER_12	YAO_TEMPORAL_RESPONSE_TO_PROGESTERONE_CLUSTER_12	39	-0.483144	-2.36706	2.85e-05	0.00116407	0.000977732	2628	tags=69%, list=31%, signal=48%	HIKESHI/EBF1/SHD/CASP8/GNA12/SNAPC2/GNAI2/HIGD2A/CLN6/QARS1/FARS2/FKBP9/IDH1/MCM3/ERGIC3/MPDU1/HMGN2/HSD17B10/PLEKHO1/AHCY/PC/GNG11/CIRBP/CYHR1/RAB3D/TRIM59/H2AC4
REACTOME_MEIOTIC_SYNAPSIS	REACTOME_MEIOTIC_SYNAPSIS	REACTOME_MEIOTIC_SYNAPSIS	44	-0.470989	-2.36523	2.08e-05	0.000893749	0.000750685	1114	tags=39%, list=13%, signal=34%	H4C2/H2BC5/H2AC14/H4C3/REC8/H2AC6/H4-16/H4C15/H2BC11/H4C1/H4C13/H2BC17/H2AC8/H2BC8/H2AC4/H2BC13/H4C8
DURCHDEWALD_SKIN_CARCINOGENESIS_UP	DURCHDEWALD_SKIN_CARCINOGENESIS_UP	DURCHDEWALD_SKIN_CARCINOGENESIS_UP	41	-0.477197	-2.35848	8.62e-06	0.000424239	0.00035633	1122	tags=44%, list=13%, signal=38%	H1-4/E4F1/MGST1/H2BC5/HSD17B10/PANK4/SLC45A3/EXTL1/CASZ1/MAOA/GUK1/PDLIM4/CERS4/CKB/P3H3/COL16A1/H2BC13/NDUFS7
REACTOME_RHO_GTPASE_EFFECTORS	REACTOME_RHO_GTPASE_EFFECTORS	REACTOME_RHO_GTPASE_EFFECTORS	142	-0.357287	-2.35099	1.47e-07	1.2e-05	1.01e-05	1665	tags=51%, list=20%, signal=41%	H4C14/RCC2/LIMK1/H2AX/NUP133/CYBA/H2AZ1/PPP1R14A/CENPO/FMNL3/KLC1/DYNC1H1/H4C11/H2AC20/H4C12/H2BC21/MYLK/LIMK2/TUBA1A/RHOB/NUP85/DVL2/B9D2/H3C14/BIRC5/CFL1/PPP2R1B/RANGAP1/ACTB/TUBB2A/H4C5/PPP2R5B/TUBB3/FLNA/H4C2/PKN3/H2BC5/ACTG1/MAPK11/EVL/ABL1/H2AC14/H4C3/SPC24/H2AC6/CENPM/H3C2/H4-16/TUBA1B/H4C15/H2BC11/PPP2R1A/H4C1/H4C13/TUBB4B/H2BC17/H2AC8/DVL1/RHPN1/PKN1/H2BC8/H3C11/BAIAP2/PIN1/H2AC4/H2BC13/…
CREIGHTON_AKT1_SIGNALING_VIA_MTOR_DN	CREIGHTON_AKT1_SIGNALING_VIA_MTOR_DN	CREIGHTON_AKT1_SIGNALING_VIA_MTOR_DN	13	-0.686818	-2.3402	7.45e-05	0.00254569	0.0021382	1389	tags=69%, list=17%, signal=58%	ATP6V0B/MRPS7/PPP4C/PAFAH1B3/RGL2/PPP2R1A/TUBB4B/DHCR7/PFKL
REACTOME_INTERLEUKIN_7_SIGNALING	REACTOME_INTERLEUKIN_7_SIGNALING	REACTOME_INTERLEUKIN_7_SIGNALING	17	-0.615372	-2.337	0.00016763	0.0048274	0.00405467	517	tags=41%, list=6%, signal=39%	H3C2/H3C11/H3C1/H3C13/H3C10/H3C12/H3C6
STARK_PREFRONTAL_CORTEX_22Q11_DELETION_DN	STARK_PREFRONTAL_CORTEX_22Q11_DELETION_DN	STARK_PREFRONTAL_CORTEX_22Q11_DELETION_DN	257	-0.324439	-2.33406	5.54e-10	8.32e-08	6.99e-08	2945	tags=56%, list=35%, signal=37%	GDE1/ARHGAP35/COX7C/TANGO2/NOP10/MPI/SMARCB1/ACAT2/ATOX1/HAGH/MRPL40/NR1H2/SERF2/MVD/ABT1/COX5B/TMEM42/FABP3/TRMT2A/FIG4/PRDX1/DPM2/ARVCF/HAGHL/TIMM8B/H2AZ1/SMIM7/PSMB4/COPRS/GINS4/MRPL55/RPL18/TST/MLLT6/MRPS28/HS3ST4/SIRT2/PRDX3/VPS4A/MRPL57/SNAPC2/EIF6/SPSB3/ATP6AP1/UQCR11/HIGD2A/CDK5/PET100/NAXE/ELOF1/PSMB3/EMP2/SSR4/MDH2/CYB561A3/HMOX2/TXN/HCFC1R1/EIF3L/COQ4/RGS20/FH/NIPSNAP1/DGCR8/WDR82/MRPS…
GOCC_MITOCHONDRIAL_PROTEIN_CONTAINING_COMPLEX	GOCC_MITOCHONDRIAL_PROTEIN_CONTAINING_COMPLEX	GOCC_MITOCHONDRIAL_PROTEIN_CONTAINING_COMPLEX	118	-0.368287	-2.32894	5.62e-07	3.85e-05	3.24e-05	2509	tags=50%, list=30%, signal=35%	TIMM8B/MRPL52/MRPS2/MRPL55/COX4I2/MRPS28/BCKDK/MRPL57/MRPS16/UQCR11/ATP5MC3/NDUFC1/MTX2/ATP5MC2/TIMM22/AFG3L2/CHCHD6/MRPL36/UQCRH/MRPS34/NDUFAB1/MPV17L2/MRPS12/NDUFB2/TOMM40/NDUFS8/NDUFA3/MRPS7/COX8A/PPIF/ATP5F1A/TIMM50/MRPS26/ATP5F1E/HSD17B10/NDUFV1/MRPL4/CYC1/PHB2/MRPL28/UQCRQ/TIMM29/UQCRC1/NDUFA2/MRPL14/MICOS13/MRPL41/MRPL23/ATP5F1D/MRPL12/TIMM17B/NDUFA11/ROMO1/MRPL54/NDUFB11/POLRMT/NDUFB7/TIM…
POMEROY_MEDULLOBLASTOMA_DESMOPLASIC_VS_CLASSIC_UP	POMEROY_MEDULLOBLASTOMA_DESMOPLASIC_VS_CLASSIC_UP	POMEROY_MEDULLOBLASTOMA_DESMOPLASIC_VS_CLASSIC_UP	37	-0.483587	-2.32763	5.06e-05	0.00188186	0.00158062	2085	tags=57%, list=25%, signal=43%	NEUROG1/OLFM1/RPN2/NUCB1/LRP8/PPP2R1B/MYL5/USP11/SUSD6/KANK1/APLP1/PSMB5/GNB3/ABL2/GPX4/CITED1/THBS4/AANAT/E2F1/BSG/ILVBL
HP_MATERNAL_DIABETES	HP_MATERNAL_DIABETES	HP_MATERNAL_DIABETES	12	-0.69759	-2.3192	7.25e-05	0.00248611	0.00208815	1347	tags=75%, list=16%, signal=63%	CDON/MTHFR/KCNJ11/DLL1/GAS1/OTX2/FUZ/ABCC8/DISP1
WP_FBXL10_ENHANCEMENT_OF_MAPERK_SIGNALING_IN_DIFFUSE_LARGE_BCELL_LYMPHOMA	WP_FBXL10_ENHANCEMENT_OF_MAPERK_SIGNALING_IN_DIFFUSE_LARGE_BCELL_LYMPHOMA	WP_FBXL10_ENHANCEMENT_OF_MAPERK_SIGNALING_IN_DIFFUSE_LARGE_BCELL_LYMPHOMA	15	-0.634379	-2.31688	0.000100905	0.00328671	0.0027606	517	tags=47%, list=6%, signal=44%	H3C2/H3C11/H3C1/H3C13/H3C10/H3C12/H3C6
SCHUHMACHER_MYC_TARGETS_UP	SCHUHMACHER_MYC_TARGETS_UP	SCHUHMACHER_MYC_TARGETS_UP	42	-0.464929	-2.3145	3.86e-05	0.00151846	0.00127539	3301	tags=79%, list=40%, signal=48%	SRM/SLC20A1/POLR2H/MYC/EXOSC7/PEBP1/EXOSC2/FKBP4/MTHFD1/ATP1B3/TRAP1/SLC39A14/RRP1B/FABP5/PRDX4/VARS1/LRP8/CTPS1/POLD2/RCC1/VRK1/FASN/MGST1/UCK2/BOP1/CYP51A1/TBL3/AHCY/CAD/PYCR1/SORD/CDK4/ACSL1
REACTOME_INFECTIOUS_DISEASE	REACTOME_INFECTIOUS_DISEASE	REACTOME_INFECTIOUS_DISEASE	381	-0.300388	-2.31057	1e-10	1.8e-08	1.52e-08	1907	tags=38%, list=23%, signal=31%	RPN2/CTDP1/MGAT5/FXYD6/VPS37C/TXN/RPL39/RPL39L/RPLP2/NUP93/HGS/RPS12/PRKACB/RPSA/NUP85/TRIM27/DVL2/ISG15/FEN1/H3C14/NELFCD/NUP62/MOGS/NUP188/RCC1/RPS9/RPS21/PRKCSH/RPS14/POLR2G/CALR/RPS19/RANGAP1/ACTB/ADCY1/HDAC3/GNGT1/CD9/RPL10/AP2M1/PSMB1/TUBB2A/UBA52/CPSF4/H4C5/RPL3/RPLP0/AP1M2/VIPR1/NUP210/GANAB/CHMP6/TUBB3/RPL29/ELOB/SYK/ERCC2/ST6GALNAC4/VCP/ST3GAL1/MGAT4B/H4C2/VPS37B/RPL23A/MGAT1/H2BC5/MTA1…
PECE_MAMMARY_STEM_CELL_UP	PECE_MAMMARY_STEM_CELL_UP	PECE_MAMMARY_STEM_CELL_UP	72	-0.408269	-2.30985	8.32e-06	0.000418784	0.000351748	3459	tags=72%, list=41%, signal=43%	DDR1/CLTB/COX4I1/COX6C/TUBA4A/RPLP1/STK35/DYNLL1/EIF3K/RPS18/HINT1/RPL13A/RPS19BP1/KARS1/GAPDH/TIMM8B/TALDO1/FAU/UQCR11/PET100/OXLD1/TXN/RPL39/RPLP2/RPS12/RPSA/NOP53/NDUFB2/RPS14/CNPPD1/RPS19/TUBB2A/UBA52/TRAPPC5/TMSB10/IL4R/RPL23A/SMARCA4/ATP5F1E/DLL1/ACTG1/GUCD1/EEF1D/RPL18A/DUSP7/RPL13/TUBB4B/PRDX2/UBL5/RPS29/NDUFA11/RPS28
GOBP_RIBOSOME_ASSEMBLY	GOBP_RIBOSOME_ASSEMBLY	GOBP_RIBOSOME_ASSEMBLY	40	-0.471376	-2.30815	4.84e-05	0.00181861	0.0015275	2481	tags=65%, list=30%, signal=46%	DDX28/MRPS2/EIF6/RRP7BP/ERAL1/DHX37/TRAF7/RPLP0P6/RPSA/MPV17L2/PPAN/RRP7A/NOP53/RPS14/DHX30/RPS19/RPL10/RPL3/RPLP0/MRPS7/RPL23A/BOP1/NLE1/RPS5/RPS15/RPS28
ENK_UV_RESPONSE_KERATINOCYTE_UP	ENK_UV_RESPONSE_KERATINOCYTE_UP	ENK_UV_RESPONSE_KERATINOCYTE_UP	248	-0.320568	-2.30293	5.34e-09	6.09e-07	5.12e-07	1948	tags=39%, list=23%, signal=31%	TRAF4/LY6E/P4HB/EIF3G/NUCB1/ACTN4/TIMM44/RGS12/NEDD8/OAZ1/MRPS12/GLA/ISG15/GADD45B/RPS9/MSI1/RACK1/RPS21/NDUFS8/RALY/CFL1/UBE2M/SELENOW/RPL10/PEPD/JUNB/TUBB2A/ATP6V0B/MGMT/MCM3/ERGIC3/GCHFR/NME4/MPDU1/PTOV1/RPL29/RECQL4/ELOB/COPE/VCP/PPIF/ATP5F1A/STOML2/TECR/MPG/RXRA/GSTP1/VASP/HLA-A/PPP1CA/COMT/ABL1/POLR2L/CTSD/RPL18A/HLA-F/APRT/PLIN3/CYC1/PHB2/MYCN/HMBS/RPS5/PPP4C/GPX4/UQCRC1/H1-3/ST3GAL2/AKR1B…
GOCC_CYTOSOLIC_SMALL_RIBOSOMAL_SUBUNIT	GOCC_CYTOSOLIC_SMALL_RIBOSOMAL_SUBUNIT	GOCC_CYTOSOLIC_SMALL_RIBOSOMAL_SUBUNIT	21	-0.565198	-2.3018	0.000106924	0.00342538	0.00287707	1900	tags=62%, list=23%, signal=48%	B3GALT4/RPS12/RPSA/ISG15/RPS9/RPS21/RPS14/RPS19/UBA52/RPS5/RPS29/RPS15/RPS28
HELLER_HDAC_TARGETS_UP	HELLER_HDAC_TARGETS_UP	HELLER_HDAC_TARGETS_UP	173	-0.339016	-2.29935	7.59e-08	6.52e-06	5.48e-06	1949	tags=42%, list=23%, signal=33%	H2AC18/TUBA1A/ACACA/NRTN/HCFC1R1/IFT140/POR/TOP3B/G6PD/CADM4/KHK/FGFR4/MICALL2/LPCAT3/CDK10/ISG15/GSTM4/BIRC5/HDAC3/PAGR1/CD9/ADARB1/JUNB/TUBB2A/TMSB15A/ADAM15/LLGL2/SEZ6L2/APLP1/MARCKSL1/DBN1/H2AC17/H2AC11/CCNF/CSRP2/SLC17A7/ATP13A2/SGK3/MGST3/H2AC13/RTN2/H2AC14/FSCN1/TYK2/AGRN/H2AC6/H3C2/DNM2/TSPAN4/DAPK3/TMEFF1/H1-10/MAOA/PLPPR2/H2AC8/COTL1/PRDX2/H2BC8/SNTA1/MFSD12/HMG20B/ARG2/TMEM259/ALDH4A1/…
CAIRO_HEPATOBLASTOMA_CLASSES_UP	CAIRO_HEPATOBLASTOMA_CLASSES_UP	CAIRO_HEPATOBLASTOMA_CLASSES_UP	276	-0.316159	-2.29885	5.72e-10	8.48e-08	7.13e-08	2464	tags=46%, list=30%, signal=33%	NPM3/EIF3B/GINS4/NR2F6/TRIP13/KIF22/RPL18/LYRM4/PRDX6/SRSF9/ZNF696/TRIM28/TRAP1/ANGEL1/ATP6AP1/RUVBL2/ATP5MC2/HMGA2/EIF4A3/GTF3C2/SAE1/UQCRH/HTRA2/CDC25A/HIC2/RPN2/P4HB/PRDX4/VARS1/EIF3L/NUP93/NUP85/QARS1/RNASEH2A/PNKP/NT5DC2/DOP1B/RCC1/C8orf33/MMS19/RPS9/DDX56/RACK1/RPS21/RPS14/BIRC5/VRK1/RFXANK/ARID3A/DAZAP1/PTDSS1/DGKD/DNMT3A/SLCO4A1/BZW2/MCM3/RPLP0/BFAR/ERGIC3/TRMU/NUP210/DTYMK/NHP2/DUSP9/MRP…
REACTOME_CELL_CYCLE_MITOTIC	REACTOME_CELL_CYCLE_MITOTIC	REACTOME_CELL_CYCLE_MITOTIC	251	-0.317019	-2.28931	3.31e-09	3.98e-07	3.34e-07	1645	tags=33%, list=20%, signal=28%	FEN1/B9D2/H3C14/NUP62/POLD2/NUP188/RCC1/POLE4/BIRC5/VRK1/PPP2R1B/RANGAP1/TUBGCP2/CABLES1/PSMB1/TUBB2A/UBA52/H4C5/PPP2R5B/MCM3/ANAPC2/NUP210/AKT2/CHMP6/TUBB3/CEP72/MCM5/TUBGCP6/RAB1B/H4C2/SKP2/MCM6/GINS3/H2BC5/PSMB5/CCND3/POLE/ESPL1/GINS2/ABL1/AKT1/RBX1/H2AC14/MCM7/H4C3/ACTR1A/SPC24/E2F2/H2AC6/CENPM/H3C2/TUBB/PSMA7/SSNA1/H4-16/TUBA1B/MCM2/H4C15/H2BC11/PPP2R1A/H4C1/H4C13/FZR1/TUBB4B/MZT2A/H2BC17/H2…
WHITEFORD_PEDIATRIC_CANCER_MARKERS	WHITEFORD_PEDIATRIC_CANCER_MARKERS	WHITEFORD_PEDIATRIC_CANCER_MARKERS	51	-0.434962	-2.28327	5.43e-05	0.00197779	0.0016612	1235	tags=39%, list=15%, signal=34%	DTYMK/MCM5/RECQL4/RRP1/ILF3/ESPL1/GINS2/MCM7/DNMT1/MYCN/H4C3/PAFAH1B3/TMEFF1/ASF1B/CDK4/E2F1/NUDT1/UHRF1/LMNB2/TK1
GARCIA_TARGETS_OF_FLI1_AND_DAX1_DN	GARCIA_TARGETS_OF_FLI1_AND_DAX1_DN	GARCIA_TARGETS_OF_FLI1_AND_DAX1_DN	74	-0.398552	-2.27983	7.57e-06	0.000388304	0.000326148	2021	tags=49%, list=24%, signal=37%	NAGPA/CDK2/TCF19/CDC25A/TOE1/RRP9/NDN/WDR5/FEN1/CBX2/RCC1/INF2/TGIF2/UBA52/H4C5/TRMT61A/SKP2/GINS3/ELP5/SLC25A10/GINS2/MYO10/AMDHD2/H4C3/UCK1/SLC5A6/E2F2/CENPM/PSMA7/CENPX/C19orf48/H4C13/NCAPH2/ZNF560/TELO2/POLR2E
GOBP_RIBONUCLEOSIDE_TRIPHOSPHATE_BIOSYNTHETIC_PROCESS	GOBP_RIBONUCLEOSIDE_TRIPHOSPHATE_BIOSYNTHETIC_PROCESS	GOBP_RIBONUCLEOSIDE_TRIPHOSPHATE_BIOSYNTHETIC_PROCESS	38	-0.466055	-2.2779	9.51e-05	0.00313996	0.00263734	1696	tags=50%, list=20%, signal=40%	CTPS1/PINK1/UCKL1/VPS9D1/NME4/VCP/ATP5F1A/NUDT2/STOML2/ATP5F1E/ANTKMT/SPHK2/UCK2/UQCC3/CAD/UCK1/NME3/ATP5F1D/TMSB4X
DUTERTRE_ESTRADIOL_RESPONSE_24HR_UP	DUTERTRE_ESTRADIOL_RESPONSE_24HR_UP	DUTERTRE_ESTRADIOL_RESPONSE_24HR_UP	145	-0.345424	-2.27766	4.34e-07	3.11e-05	2.62e-05	2720	tags=54%, list=33%, signal=37%	SUV39H1/RFC2/POLA2/EXOSC2/TTF2/H2AX/HAUS4/FKBP4/NCAPD3/CENPO/LRIG1/TRIP13/MTHFD1/TST/TFAP4/ARL3/TMED8/PKMYT1/CDK2/IMPA2/TCF19/DHTKD1/GTSE1/NUP85/RNASEH2A/GLA/FEN1/POLD2/BIRC5/VRK1/ADCY1/MCM3/MCM5/RECQL4/UNG/CELSR2/PPIF/H1-4/SKP2/MCM6/GINS3/TONSL/POLE/ESPL1/GINS2/FANCC/SGK3/MANEAL/MCM7/CTSD/CA12/CHTF18/C21orf58/DNMT1/SPC24/COLGALT1/E2F2/SNRNP25/EXOSC5/CHAF1A/CENPM/H1-2/FANCG/CDCA4/FANCA/MCM2/NR2C2…
REACTOME_HOMOLOGY_DIRECTED_REPAIR	REACTOME_HOMOLOGY_DIRECTED_REPAIR	REACTOME_HOMOLOGY_DIRECTED_REPAIR	66	-0.410633	-2.26984	2.13e-05	0.00090506	0.000760185	1713	tags=42%, list=21%, signal=34%	SPIDR/MUS81/FEN1/POLD2/POLE4/TOP3A/UBA52/H4C5/EME2/H4C2/H2BC5/POLE/ABL1/H4C3/PPP4C/H4-16/PIAS4/H4C15/H2BC11/H4C1/H4C13/H2BC17/SIRT6/H2BC8/POLD1/XRCC3/H2BC13/H4C8
KEGG_RIBOSOME	KEGG_RIBOSOME	KEGG_RIBOSOME	38	-0.463975	-2.26774	0.000105986	0.00341554	0.00286881	1869	tags=50%, list=22%, signal=39%	RPL39/RPLP2/RPS12/RPSA/RPS9/RPS21/RPS19/RPL10/UBA52/RPL3/RPLP0/RPL29/RPL23A/RPL18A/RPS5/RPL13/RPS29/RPS15/RPS28
REACTOME_SIGNALING_BY_NUCLEAR_RECEPTORS	REACTOME_SIGNALING_BY_NUCLEAR_RECEPTORS	REACTOME_SIGNALING_BY_NUCLEAR_RECEPTORS	143	-0.344564	-2.26381	3.6e-07	2.65e-05	2.23e-05	1475	tags=34%, list=18%, signal=29%	HDAC3/GNGT1/KANK1/TLE3/H4C5/USF2/FASN/AKT2/AXIN1/RDH13/H4C2/RXRA/H2BC5/PRMT1/GNB3/AKT1/POLR2L/H2AC14/CTSD/H4C3/CXXC5/MOV10/GNG11/H2AC6/H3C2/H4-16/CITED1/SREBF1/H4C15/GNB5/H2BC11/H4C1/H4C13/KDM4B/H2BC17/H2AC8/SPHK1/CARM1/H2BC8/H3C11/H2AC4/H2BC13/POLR2E/H3C1/H3C13/H4C8/H3C10/H3C12/H3C6
REACTOME_NONHOMOLOGOUS_END_JOINING_NHEJ	REACTOME_NONHOMOLOGOUS_END_JOINING_NHEJ	REACTOME_NONHOMOLOGOUS_END_JOINING_NHEJ	34	-0.483303	-2.26103	0.000162023	0.00470345	0.00395056	1460	tags=44%, list=17%, signal=37%	POLL/H4C5/H4C2/H2BC5/H4C3/H4-16/PIAS4/H4C15/H2BC11/H4C1/H4C13/H2BC17/H2BC8/H2BC13/H4C8
HP_ABNORMALITY_OF_THE_POSTERIOR_PITUITARY	HP_ABNORMALITY_OF_THE_POSTERIOR_PITUITARY	HP_ABNORMALITY_OF_THE_POSTERIOR_PITUITARY	21	-0.553751	-2.25519	0.000184867	0.00519687	0.00436499	3312	tags=90%, list=40%, signal=55%	NF2/SMO/PI4KA/SMARCB1/TGIF1/BAP1/PTCH1/TRAF7/LHX4/GPR161/CDON/MTHFR/DLL1/GAS1/AKT1/OTX2/DISP1/PUF60/TERT
KEGG_PYRIMIDINE_METABOLISM	KEGG_PYRIMIDINE_METABOLISM	KEGG_PYRIMIDINE_METABOLISM	46	-0.446369	-2.25465	7.1e-05	0.0024631	0.00206883	1696	tags=50%, list=20%, signal=40%	CTPS1/POLD2/POLE4/POLR2G/DCTD/POLR3K/POLR1E/UCKL1/NME4/DTYMK/NUDT2/NT5M/UCK2/POLR3H/POLE/POLR2L/CAD/UCK1/NME3/ENTPD6/POLD1/TK1/POLR2E
YAO_TEMPORAL_RESPONSE_TO_PROGESTERONE_CLUSTER_13	YAO_TEMPORAL_RESPONSE_TO_PROGESTERONE_CLUSTER_13	YAO_TEMPORAL_RESPONSE_TO_PROGESTERONE_CLUSTER_13	90	-0.377346	-2.25028	8.42e-06	0.000420324	0.000353042	2178	tags=56%, list=26%, signal=42%	CYBA/TIMM8B/H2AZ1/MRPL52/TKT/PCCB/UQCR11/NDUFC1/DBNL/ELOF1/COMMD1/GSTM3/TCF19/TSEN34/NEDD8/NAA38/CUEDC2/LAGE3/NDUFA3/TXNDC17/POLR3K/ABCC1/SLC35B2/PARK7/SUMO3/ELOB/SNRPD2/NUDT16L1/ATP5F1E/DGCR6L/CUTA/SF3B5/CSRP2/PC/MRPL28/GPX4/NDUFA2/PAFAH1B3/SSNA1/MICOS13/MRPL23/REX1BD/GUK1/PRDX2/UBL5/TMEM205/ROMO1/NDUFB11/ILVBL/CD320
GOCC_MITOCHONDRIAL_MATRIX	GOCC_MITOCHONDRIAL_MATRIX	GOCC_MITOCHONDRIAL_MATRIX	212	-0.320644	-2.24856	2.57e-08	2.44e-06	2.05e-06	2828	tags=54%, list=34%, signal=37%	HAGH/MRPL40/CCNB1/HADHB/KARS1/MRPL30/ACAD8/ISCA2/GSTZ1/MTG1/NMNAT3/ELAC2/GOT2/MRPL52/DDX28/PRDX5/POLDIP2/MRPS2/MCAT/MRPL55/BCAT2/TST/LYRM4/ETHE1/CARS2/MRPS28/BCKDK/ECHS1/ACSF3/MIPEP/PRDX3/TRAP1/MRPL57/MRPS16/ERAL1/MRM3/PCCB/HADH/NAXE/MDH2/SCO2/MRPL36/BCL2L1/ALDH1B1/DHTKD1/ACOT2/MRPS34/IVD/SARS2/TIMM44/NDUFAB1/FH/QARS1/MPV17L2/MRPS12/BTD/GADD45GIP1/PCK2/FARS2/NDUFS8/DHX30/FASTK/TOP3A/UQCC2/ATAD3A/…
CREIGHTON_AKT1_SIGNALING_VIA_MTOR_UP	CREIGHTON_AKT1_SIGNALING_VIA_MTOR_UP	CREIGHTON_AKT1_SIGNALING_VIA_MTOR_UP	27	-0.51203	-2.24627	0.000274796	0.00705094	0.00592228	1811	tags=52%, list=22%, signal=41%	POR/NEDD8/CYB561/CORO1B/UBE2M/MMP15/TOLLIP/AKT1/GPX4/TJP3/RNF126/MVK/BSG/CDC34
KRIGE_RESPONSE_TO_TOSEDOSTAT_6HR_DN	KRIGE_RESPONSE_TO_TOSEDOSTAT_6HR_DN	KRIGE_RESPONSE_TO_TOSEDOSTAT_6HR_DN	459	-0.283888	-2.24394	1e-10	1.8e-08	1.52e-08	2169	tags=40%, list=26%, signal=31%	ATP5MC3/ERGIC1/NDUFC1/SYNGR2/PPP1R14B/TSPOAP1/TIMM22/ARHGAP25/NAXE/NOC2L/ELOF1/BAHCC1/SLC29A2/NAGPA/SCO2/MRPL36/DNAJB1/RRP1B/SFXN4/ALDH1B1/VKORC1/LY6E/FABP5/ARRB1/DHX37/HMOX2/RRP9/PRDX4/ACOT7/AURKAIP1/VARS1/CD81/MICAL2/HDAC4/PLAAT1/ZNF574/CYB561/PPAN/CCDC124/MRPS12/GLA/RRP7A/ARHGEF40/NAA38/GADD45GIP1/GRAMD4/NELFCD/NUP62/CLUH/POLD2/GADD45B/MOGS/RCC1/INF2/MED24/CLPTM1L/TGIF2/FBRSL1/TRAPPC2L/SCARB1/…
AMIT_EGF_RESPONSE_480_HELA	AMIT_EGF_RESPONSE_480_HELA	AMIT_EGF_RESPONSE_480_HELA	87	-0.37954	-2.24205	1.18e-05	0.000558557	0.000469147	3112	tags=67%, list=37%, signal=42%	GAK/FGFR1/PLPP3/TNFRSF21/ERCC1/MAP2K3/FAM50B/RRBP1/ARHGDIA/HOMER3/HMGXB3/DHPS/PLEC/SLC35F6/SLC1A5/EHD1/TOR4A/BRD3OS/MYO9B/EGLN1/BCL2L1/PTPRF/TRAF4/LY6E/MICAL2/CYB561/PMEPA1/TSPAN14/GRAMD1B/RANGAP1/PPDPF/TUBB2A/USF2/XAB2/HPCAL1/PPIF/BIN1/RRP1/MTA1/YJU2/VASP/CCND3/PGAP6/ITPR3/EFHD2/AGRN/DUSP7/DGAT1/ENC1/SLC19A1/DAPK3/PHC2/TUBB4B/ARHGEF18/SPHK1/RNF126/GPAA1/NCLN
WONG_MITOCHONDRIA_GENE_MODULE	WONG_MITOCHONDRIA_GENE_MODULE	WONG_MITOCHONDRIA_GENE_MODULE	99	-0.366864	-2.24089	8.4e-06	0.000420324	0.000353042	3230	tags=66%, list=39%, signal=41%	CYB5A/GLUD1/ATP5F1B/SLC16A3/TIMM10/UQCR10/SFXN5/COX7C/ATOX1/MRPL40/KARS1/COX5B/SLC25A17/GSTZ1/TIMM8B/GOT2/PRDX5/MCAT/ATP1B3/GCAT/MRPS28/ECHS1/MIPEP/MRPS16/ATP6AP1/PCCB/UQCR11/ATP5MC3/NDUFC1/AIFM1/MTX2/ATP5MC2/SCP2/SCO2/MRPL36/NDUFAB1/FH/NIPSNAP1/NDUFB2/TOMM40/PCK2/NDUFS8/SLC25A1/NDUFA3/NME4/UNG/COX8A/PPIF/ATP5F1E/HSD17B10/NDUFV1/NT5M/SLC25A22/BOP1/CYC1/UQCRQ/GPX4/MAOA/MRPL12/CLPP/LONP1/TIMM17B/EC…
REACTOME_INFLUENZA_INFECTION	REACTOME_INFLUENZA_INFECTION	REACTOME_INFLUENZA_INFECTION	70	-0.398516	-2.23828	2.8e-05	0.00114843	0.000964602	1869	tags=46%, list=22%, signal=36%	RPL39/RPL39L/RPLP2/NUP93/RPS12/RPSA/NUP85/ISG15/NUP62/NUP188/RPS9/RPS21/RPS14/POLR2G/CALR/RPS19/RPL10/UBA52/CPSF4/RPL3/RPLP0/NUP210/RPL29/RPL23A/POLR2L/RPL18A/RPS5/RPL13/RPS29/RPS15/RPS28/POLR2E
ACEVEDO_NORMAL_TISSUE_ADJACENT_TO_LIVER_TUMOR_DN	ACEVEDO_NORMAL_TISSUE_ADJACENT_TO_LIVER_TUMOR_DN	ACEVEDO_NORMAL_TISSUE_ADJACENT_TO_LIVER_TUMOR_DN	164	-0.332412	-2.23751	3.9e-07	2.85e-05	2.4e-05	1806	tags=38%, list=22%, signal=31%	CD99L2/NUDT14/QARS1/LDLR/PDXK/OAZ1/NAA38/NUP62/FGFRL1/SLC25A1/ZNF689/PPM1F/CTSB/FASN/EEF2K/MXD4/MYDGF/CENPV/RIC8A/NUDT2/MRPS26/VPS37B/TECR/RXRA/HPS6/CPSF1/ACTG1/CACNA1H/MAMDC4/SLC25A22/TMEM160/EVL/EFHD2/STK11/VPS26B/AHCY/H4C3/UCK1/SNRNP25/EEF2/ZNF672/PRADC1/CENPX/DGAT1/ENDOG/LRP5/AGPAT2/APH1A/MAOA/TUBB4B/BOK/TBC1D16/CLPP/LONP1/ARMC6/MVK/VPS28/FEM1A/ROMO1/MPND/MACROD1/REEP6/THOP1
NIKOLSKY_BREAST_CANCER_7P22_AMPLICON	NIKOLSKY_BREAST_CANCER_7P22_AMPLICON	NIKOLSKY_BREAST_CANCER_7P22_AMPLICON	23	-0.534638	-2.23662	0.000166521	0.00480825	0.00403858	2463	tags=70%, list=29%, signal=49%	EIF3B/GNA12/FAM20C/TNRC18/TTYH3/MICALL2/AP5Z1/ACTB/RADIL/SNX8/INTS1/C7orf50/BRAT1/SLC29A4/NUDT1/LFNG
GOMF_PROTEIN_HETERODIMERIZATION_ACTIVITY	GOMF_PROTEIN_HETERODIMERIZATION_ACTIVITY	GOMF_PROTEIN_HETERODIMERIZATION_ACTIVITY	149	-0.336043	-2.23445	9.27e-07	5.97e-05	5.02e-05	1114	tags=28%, list=13%, signal=25%	H4C2/JAM3/H2BC5/HSF1/H2AC17/H2AC11/MAPK4/TAF6L/H2AC13/ADRA2C/PHB2/H2AC21/H4C3/H2AC15/H2AC6/PAFAH1B3/H3C2/H4-16/H4C15/QTRT1/H2BC11/PPP2R1A/H4C1/H4C13/H2BC17/H2AC8/BOK/H2BC8/H2BC18/KATNB1/TENM1/H3C11/TCF3/H2AC4/H2BC13/H2AC16/H3C1/H3C13/H4C8/H3C10/H3C12/H3C6
WP_OXIDATIVE_PHOSPHORYLATION	WP_OXIDATIVE_PHOSPHORYLATION	WP_OXIDATIVE_PHOSPHORYLATION	24	-0.524628	-2.22999	0.000255027	0.00660828	0.00555048	2208	tags=67%, list=26%, signal=49%	ATP6AP1/ATP5MC3/NDUFC1/ATP5MC2/NDUFAB1/NDUFB2/NDUFS8/NDUFA3/ATP5F1A/ATP5F1E/NDUFV1/NDUFA2/ATP5F1D/NDUFA11/NDUFB7/NDUFS7
WAMUNYOKOLI_OVARIAN_CANCER_LMP_UP	WAMUNYOKOLI_OVARIAN_CANCER_LMP_UP	WAMUNYOKOLI_OVARIAN_CANCER_LMP_UP	139	-0.340883	-2.22372	7.71e-07	5.09e-05	4.27e-05	1984	tags=45%, list=24%, signal=35%	IMPA2/CACFD1/TRAF4/DHTKD1/OXLD1/TXN/QSOX1/AURKAIP1/CC2D1A/POR/TMEM129/RRP7A/TOMM40/INF2/CLPTM1L/C8orf82/RALY/CNPPD1/ACTB/MKNK2/PPDPF/BZW2/TRAPPC5/LLGL2/TTLL12/CENPV/VPS37B/SMARCA4/GSTP1/GSS/UQCC3/EFHD2/MCRIP2/MYO10/ARRDC1/CXXC5/UQCRQ/PRXL2B/SLC22A23/NOSIP/GALE/GRTP1/ANKRD9/MRPL14/MGLL/PWWP2B/DOHH/MRPL41/CHMP1A/TJP3/FAM174B/RNF126/AACS/FAAP100/MED16/GIPC1/RABL6/TMEM259/GNA11/MPST/LSM7/PLEKHJ1
HP_INFANTILE_AXIAL_HYPOTONIA	HP_INFANTILE_AXIAL_HYPOTONIA	HP_INFANTILE_AXIAL_HYPOTONIA	17	-0.584543	-2.21992	0.000469446	0.0108289	0.00909548	2650	tags=82%, list=32%, signal=56%	TGIF1/PTCH1/SLC39A14/GRIN2A/EXTL3/TSEN34/PSAP/CDON/TUBB3/TSEN54/DLL1/GAS1/DISP1/MAN2B1
DACOSTA_UV_RESPONSE_VIA_ERCC3_UP	DACOSTA_UV_RESPONSE_VIA_ERCC3_UP	DACOSTA_UV_RESPONSE_VIA_ERCC3_UP	162	-0.327654	-2.20672	4.42e-07	3.15e-05	2.65e-05	3439	tags=66%, list=41%, signal=40%	CLTB/ARPC4/PLCB3/RNF40/PNP/TBCC/MOAP1/PCNA/CDT1/TUBA4A/EIF4EBP1/CDKN2C/ASL/RAD9A/GLUD1/MYBL2/PPP2R5D/PLTP/LHX2/ERCC1/DMPK/CEP68/ACAA1/RPUSD2/MVD/RFC2/SLC1A5/AP3M2/GALNT2/CDKN1C/UBA1/PLXNA3/RBM38/RPS6KB2/TST/NFKBIE/GCAT/FGFR3/OAZ2/GRHPR/NCDN/MBOAT7/PLEKHO2/SCO2/PKMYT1/CDK2/SHMT1/ALDH1B1/ACOT2/LY6E/GRINA/RHOB/MRPS12/ISG15/FEN1/CBX2/KCNJ4/SELENOW/JUNB/TUBB2A/U2AF2/ERGIC3/SNRPA/MPDU1/FLNA/MCM5/ERCC2/…
BURTON_ADIPOGENESIS_5	BURTON_ADIPOGENESIS_5	BURTON_ADIPOGENESIS_5	66	-0.398662	-2.20367	5.34e-05	0.00195385	0.00164109	2343	tags=56%, list=28%, signal=41%	H2AC19/ECHS1/TALDO1/PRDX3/PEX11A/UQCR11/AIFM1/MTX2/MDH2/UQCRH/MRPS34/FABP5/IVD/POR/G6PD/NDUFAB1/TOMM40/MKNK2/RREB1/PPIF/MRPS26/PTGES2/JAGN1/TYSND1/GUCD1/MGST3/CYC1/PC/PHB2/C16orf74/SLC5A6/ESRRA/PRADC1/MRPL12/SIPA1/ACSL1/H2AC4
GRAHAM_NORMAL_QUIESCENT_VS_NORMAL_DIVIDING_DN	GRAHAM_NORMAL_QUIESCENT_VS_NORMAL_DIVIDING_DN	GRAHAM_NORMAL_QUIESCENT_VS_NORMAL_DIVIDING_DN	29	-0.488806	-2.20282	0.000479117	0.010968	0.00921235	2952	tags=76%, list=35%, signal=49%	MCM10/CDC45/AQP3/NPM3/TRIP13/ATP5MC3/CDC25A/FABP5/NUP85/RNASEH2A/FEN1/BIRC5/VRK1/MCM5/PPIF/MCM6/GINS2/SNRNP25/CENPM/MCM2/COTL1/TK1
REACTOME_SUMOYLATION_OF_CHROMATIN_ORGANIZATION_PROTEINS	REACTOME_SUMOYLATION_OF_CHROMATIN_ORGANIZATION_PROTEINS	REACTOME_SUMOYLATION_OF_CHROMATIN_ORGANIZATION_PROTEINS	35	-0.465718	-2.20272	0.000116505	0.00362503	0.00304477	1805	tags=60%, list=22%, signal=47%	H4C11/H4C12/NUP93/CBX8/HDAC4/NUP85/NUP62/CBX2/NUP188/L3MBTL2/H4C5/NUP210/SUMO3/H4C2/H4C3/H4-16/H4C15/PHC2/H4C1/H4C13/H4C8
MORI_EMU_MYC_LYMPHOMA_BY_ONSET_TIME_UP	MORI_EMU_MYC_LYMPHOMA_BY_ONSET_TIME_UP	MORI_EMU_MYC_LYMPHOMA_BY_ONSET_TIME_UP	55	-0.412348	-2.20127	0.000109492	0.00348701	0.00292883	2545	tags=56%, list=30%, signal=39%	EBF1/CENPO/MTHFD1/TRIM28/SMPD4/ELOF1/SHMT1/TRAF4/MED9/TRIB2/CBX2/U2AF2/DAB2IP/ZNF428/SMARCA4/ILF3/CPLX2/TYSND1/GINS2/MCM7/AHCY/PHB2/SAPCD2/H1-3/CDCA4/JMJD4/LLGL1/SNRPB/UHRF1/CACTIN/TCF3
BILANGES_SERUM_AND_RAPAMYCIN_SENSITIVE_GENES	BILANGES_SERUM_AND_RAPAMYCIN_SENSITIVE_GENES	BILANGES_SERUM_AND_RAPAMYCIN_SENSITIVE_GENES	27	-0.50158	-2.20042	0.00049668	0.0112984	0.00948986	1810	tags=63%, list=22%, signal=49%	RPL18/FAU/EIF3L/TMEM121B/QARS1/NOP53/RPS9/RACK1/RPS14/RPS19/RPL10/UBA52/RPL29/RPL18A/RPS5/EEF2/RPL13
FAELT_B_CLL_WITH_VH3_21_UP	FAELT_B_CLL_WITH_VH3_21_UP	FAELT_B_CLL_WITH_VH3_21_UP	28	-0.494208	-2.19581	0.000338826	0.00833821	0.00700349	4021	tags=96%, list=48%, signal=50%	VDAC1/ARHGEF1/E2F4/CDK16/STXBP2/HMGA1/KDM5C/SRC/PPP5C/MYO9B/PPT2/GNA12/SMG5/PKMYT1/KCNAB2/POR/TOP3B/ACTN4/TOMM40/CLUH/PRKCSH/CALR/VCP/BCR/SBNO2/DVL1/TK1
HP_CENTRAL_HYPOTHYROIDISM	HP_CENTRAL_HYPOTHYROIDISM	HP_CENTRAL_HYPOTHYROIDISM	26	-0.504006	-2.1907	0.000570187	0.0124225	0.010434	3342	tags=88%, list=40%, signal=53%	OCA2/NF2/SMO/FGFR1/SMARCB1/TGIF1/BAP1/PTCH1/GLI3/SETBP1/TRAF7/LHX4/NDN/RPL10/CDON/DLL1/GAS1/AKT1/OTX2/DISP1/INSR/CDH23/TERT
GOBP_CYTOPLASMIC_SEQUESTERING_OF_PROTEIN	GOBP_CYTOPLASMIC_SEQUESTERING_OF_PROTEIN	GOBP_CYTOPLASMIC_SEQUESTERING_OF_PROTEIN	10	-0.704132	-2.18978	0.000208837	0.00573931	0.00482061	1217	tags=70%, list=15%, signal=60%	FLNA/DBN1/CCDC22/MDFI/PKD1/KEAP1/TMSB4X
GOCC_SPLICEOSOMAL_TRI_SNRNP_COMPLEX	GOCC_SPLICEOSOMAL_TRI_SNRNP_COMPLEX	GOCC_SPLICEOSOMAL_TRI_SNRNP_COMPLEX	16	-0.584403	-2.18812	0.000424808	0.0100433	0.00843563	666	tags=62%, list=8%, signal=58%	CD2BP2/RNU4-2/SNRPD2/LSM2/RNU5B-1/SNRPB/LSM4/LSM7/RNU5A-1/RNU4-1
GOCC_RIBOSOME	GOCC_RIBOSOME	GOCC_RIBOSOME	94	-0.363492	-2.18729	2.53e-05	0.00106036	0.00089063	2832	tags=55%, list=34%, signal=37%	RRBP1/MRPL40/RPL13A/RPL36/MRPL30/MTG1/MRPL52/MRPS2/MRPL55/RPL18/MRPS28/MRPL57/MRPS16/MRPL36/MRPS34/B3GALT4/RPL39/RPL39L/RPLP0P6/RPLP2/RPS12/RPSA/MPV17L2/MRPS12/ISG15/RPS9/RACK1/RPS21/RPS14/RNA5S9/RPS19/RPL10/UBA52/RPL3/RPLP0/MRPS7/RPL29/MRPS26/RPL23A/RPL18A/MRPL4/MRPL28/RPS5/MRPL14/RPL13/MRPL41/MRPL23/MRPL12/RPS29/MRPL54/RPS15/RPS28
GOBP_MONOSACCHARIDE_BIOSYNTHETIC_PROCESS	GOBP_MONOSACCHARIDE_BIOSYNTHETIC_PROCESS	GOBP_MONOSACCHARIDE_BIOSYNTHETIC_PROCESS	30	-0.484882	-2.18688	0.000331305	0.00819033	0.00687929	2316	tags=67%, list=28%, signal=48%	FAM3A/SIRT7/MIR103A1/SLC39A14/ENO2/PGP/G6PD/WDR5/PCK2/SLC25A1/SLC25A10/TPI1/STK11/DDB1/PC/SLC37A4/AKR1B1/SORD/AKR1A1/ERFE
BLANCO_MELO_COVID19_SARS_COV_2_POS_PATIENT_LUNG_TISSUE_DN	BLANCO_MELO_COVID19_SARS_COV_2_POS_PATIENT_LUNG_TISSUE_DN	BLANCO_MELO_COVID19_SARS_COV_2_POS_PATIENT_LUNG_TISSUE_DN	91	-0.364341	-2.18076	4.72e-05	0.0017808	0.00149574	1411	tags=35%, list=17%, signal=30%	DCHS1/XAB2/MAF1/ADAM15/CHFR/NDST1/ZSCAN18/RASA3/MEIS1/BCR/DLL1/FBXW5/ACTR1B/HMCES/GUCD1/PPP6R2/THOC6/MCM7/LETM1/HDHD5/SEMA3F/SLC25A29/SGSM2/KLHDC3/SLC66A2/OSBPL5/PLEKHM2/C19orf48/SPHK1/ENTPD6/NCAPH2/ILVBL
REACTOME_CELL_CYCLE	REACTOME_CELL_CYCLE	REACTOME_CELL_CYCLE	306	-0.292341	-2.17262	1.02e-08	1.09e-06	9.17e-07	1645	tags=31%, list=20%, signal=26%	FEN1/B9D2/H3C14/NUP62/POLD2/NUP188/RCC1/POLE4/BIRC5/POLR2G/VRK1/PPP2R1B/RANGAP1/TUBGCP2/CABLES1/TOP3A/PSMB1/TUBB2A/UBA52/H4C5/PPP2R5B/MCM3/ANAPC2/NUP210/NHP2/AKT2/CHMP6/TUBB3/CEP72/MCM5/TUBGCP6/RAB1B/H4C2/SKP2/MCM6/GINS3/H2BC5/PSMB5/CCND3/POLE/ESPL1/GINS2/ABL1/AKT1/POLR2L/RBX1/H2AC14/MCM7/CHTF18/H4C3/ACTR1A/REC8/SPC24/E2F2/H2AC6/CENPM/H3C2/TUBB/PSMA7/SSNA1/CENPX/H4-16/TUBA1B/PIAS4/MCM2/H4C15/H2BC…
BENPORATH_MYC_TARGETS_WITH_EBOX	BENPORATH_MYC_TARGETS_WITH_EBOX	BENPORATH_MYC_TARGETS_WITH_EBOX	99	-0.355557	-2.17182	2.22e-05	0.000937361	0.000787315	1736	tags=42%, list=21%, signal=34%	SLC2A4/FGFR4/GLA/CDK10/POLD2/RCC1/RPS19/ACTB/HDAC3/RPL10/JUNB/PSMB1/UBA52/H4C5/FASN/HMGN2/MTHFR/RPL23A/GALNS/MGST1/GSTP1/ACTG1/IFRD2/AP4M1/MCM7/HMBS/FPGS/AKR1A1/H4-16/NTHL1/SLC19A1/H4C15/SLC4A2/CDK4/INSR/TIMM17B/E2F1/TERT/RPS15/LMNB2/BSG/NTN3
GOBP_PYRIMIDINE_DEOXYRIBONUCLEOTIDE_METABOLIC_PROCESS	GOBP_PYRIMIDINE_DEOXYRIBONUCLEOTIDE_METABOLIC_PROCESS	GOBP_PYRIMIDINE_DEOXYRIBONUCLEOTIDE_METABOLIC_PROCESS	11	-0.672023	-2.16813	0.00068893	0.0145415	0.0122138	2747	tags=100%, list=33%, signal=67%	NT5C/NEIL2/NEIL1/SHMT1/DCTD/DTYMK/UNG/NT5M/NTHL1/DCTPP1
GOCC_INNER_MITOCHONDRIAL_MEMBRANE_PROTEIN_COMPLEX	GOCC_INNER_MITOCHONDRIAL_MEMBRANE_PROTEIN_COMPLEX	GOCC_INNER_MITOCHONDRIAL_MEMBRANE_PROTEIN_COMPLEX	67	-0.389074	-2.1672	5.33e-05	0.00195385	0.00164109	2171	tags=48%, list=26%, signal=36%	UQCR11/ATP5MC3/NDUFC1/MTX2/ATP5MC2/TIMM22/AFG3L2/CHCHD6/UQCRH/NDUFAB1/NDUFB2/NDUFS8/NDUFA3/COX8A/ATP5F1A/TIMM50/ATP5F1E/NDUFV1/CYC1/PHB2/UQCRQ/TIMM29/UQCRC1/NDUFA2/MICOS13/ATP5F1D/TIMM17B/NDUFA11/ROMO1/NDUFB11/NDUFB7/NDUFS7
DANG_REGULATED_BY_MYC_UP	DANG_REGULATED_BY_MYC_UP	DANG_REGULATED_BY_MYC_UP	35	-0.458062	-2.1665	0.000214147	0.00585551	0.0049182	1963	tags=54%, list=24%, signal=42%	RUVBL2/SHMT1/RRP9/TXN/VARS1/UNC119/UXT/VRK1/SNRPD2/TRAF2/UCK2/TBL3/SREBF1/SNRPB/SYNGR1/TERT/TCF3/TK1/THOP1
REACTOME_PROCESSING_OF_DNA_DOUBLE_STRAND_BREAK_ENDS	REACTOME_PROCESSING_OF_DNA_DOUBLE_STRAND_BREAK_ENDS	REACTOME_PROCESSING_OF_DNA_DOUBLE_STRAND_BREAK_ENDS	46	-0.428261	-2.16319	0.000226554	0.00613282	0.00515113	1433	tags=59%, list=17%, signal=49%	RFC2/H4C14/H2AX/RNF4/BABAM1/H4C11/H4C12/H2BC21/CDK2/TOP3A/UBA52/H4C5/H4C2/H2BC5/H4C3/PPP4C/H4-16/PIAS4/H4C15/H2BC11/H4C1/H4C13/H2BC17/SIRT6/H2BC8/H2BC13/H4C8
DOUGLAS_BMI1_TARGETS_UP	DOUGLAS_BMI1_TARGETS_UP	DOUGLAS_BMI1_TARGETS_UP	289	-0.29411	-2.16243	2.38e-08	2.31e-06	1.94e-06	2322	tags=44%, list=28%, signal=33%	CARS2/CXCL14/RBM15B/HRAS/CERCAM/SS18L1/POLR1A/STEAP3/MPRIP/PGAM5/LOXL2/SLC39A14/RUVBL2/IGDCC4/PDE9A/SEPTIN5/CDH24/ITPKA/SPTBN2/PODXL/EMP2/MBOAT7/INPP5A/FAM110A/EIF4A3/KCTD15/NCOR2/OLFM1/ACACA/GRK2/ADGRB2/ZBED4/NUP93/LRP8/NDN/MPP1/FGFR4/APEH/NT5DC2/TRIB2/ATG9A/NEO1/SCARB1/APCDD1/LAMTOR1/TMEM54/CRMP1/CABLES1/ADARB1/POLR3K/DCHS1/TAOK2/TUBB2A/SLCO4A1/FASN/CDON/UCKL1/ICMT/OBSCN/DAB2IP/TARBP2/CPNE7/REC…
CAMPS_COLON_CANCER_COPY_NUMBER_UP	CAMPS_COLON_CANCER_COPY_NUMBER_UP	CAMPS_COLON_CANCER_COPY_NUMBER_UP	41	-0.436751	-2.15859	0.000109182	0.00348701	0.00292883	2284	tags=54%, list=27%, signal=39%	SIRT7/CANT1/MPRIP/SHMT1/P4HB/TRAF7/UPF1/XPNPEP1/TOP3A/DAZAP1/RXRA/PANK4/BOP1/MIEF2/PYCR1/BRSK2/LLGL1/GPSM1/DIRAS1/RPS15/ANAPC11/PCYT2
GOBP_DNA_REPLICATION_INDEPENDENT_CHROMATIN_ORGANIZATION	GOBP_DNA_REPLICATION_INDEPENDENT_CHROMATIN_ORGANIZATION	GOBP_DNA_REPLICATION_INDEPENDENT_CHROMATIN_ORGANIZATION	17	-0.568248	-2.15804	0.000860032	0.01715	0.0144047	2213	tags=71%, list=27%, signal=52%	H4C11/H4C12/CABIN1/H4C5/H4C2/H4C3/H4-16/H4C15/H4C1/H4C13/ASF1B/H4C8
LOCKWOOD_AMPLIFIED_IN_LUNG_CANCER	LOCKWOOD_AMPLIFIED_IN_LUNG_CANCER	LOCKWOOD_AMPLIFIED_IN_LUNG_CANCER	102	-0.352153	-2.15697	1.21e-05	0.000568665	0.000477638	3010	tags=60%, list=36%, signal=39%	PI4KA/PRCC/MYC/ABCF2/LPCAT1/ALKBH4/PMVK/ANAPC15/TAF6/MANBAL/PSMB4/ZNF3/TMEM134/KLC1/DPP3/CDK5/CCDC107/COCH/NAXE/MRPL36/LY6E/FAM131A/CORO1B/SLC39A1/CLPTM1L/KCNH2/ARHGEF11/LAMTOR1/FKBP9/FASTK/PBX1/CERS2/AP2M1/MAF1/SNAPIN/FADD/RTN4R/IGSF8/PPP1R16A/FJX1/CPSF1/PYGO2/SIVA1/PPP1CA/ZNF74/RAD23A/AKT1/MCM7/PC/INPPL1/CCDC85C/MRPL23/C14orf132/SLC4A2/CDK4/DHCR7/PUF60/NUDT1/BCL11B/GPAA1/GCDH
GOBP_AEROBIC_RESPIRATION	GOBP_AEROBIC_RESPIRATION	GOBP_AEROBIC_RESPIRATION	77	-0.373414	-2.15505	3.94e-05	0.00153979	0.00129331	2007	tags=47%, list=24%, signal=36%	MDH2/UQCRH/DHTKD1/NDUFAB1/FH/NOP53/NDUFB2/NDUFS8/MIR210/NDUFA3/PINK1/UQCC2/IDH1/BID/ME3/PARK7/VCP/PPIF/ATP5F1A/DLST/STOML2/ATP5F1E/ANTKMT/NDUFV1/ARL2/SLC25A23/UQCC3/CHCHD2/CYC1/UQCRQ/UQCRC1/NDUFA2/ATP5F1D/OGDHL/NDUFB7/NDUFS7
GOBP_PYRIMIDINE_CONTAINING_COMPOUND_METABOLIC_PROCESS	GOBP_PYRIMIDINE_CONTAINING_COMPOUND_METABOLIC_PROCESS	GOBP_PYRIMIDINE_CONTAINING_COMPOUND_METABOLIC_PROCESS	35	-0.455512	-2.15444	0.00025017	0.00653515	0.00548906	1696	tags=51%, list=20%, signal=41%	CTPS1/CRMP1/DCTD/UCKL1/NME4/DPYSL5/DTYMK/UNG/NT5M/UCK2/CAD/UCK1/DPYSL3/NTHL1/DPYSL4/NME3/DCTPP1/TK1
BARRIER_COLON_CANCER_RECURRENCE_DN	BARRIER_COLON_CANCER_RECURRENCE_DN	BARRIER_COLON_CANCER_RECURRENCE_DN	12	-0.646859	-2.15054	0.000429544	0.0101331	0.00851109	1858	tags=67%, list=22%, signal=52%	NUCB1/CDK10/KCNAB1/BTBD2/SPPL2B/PFKL/TLE5/BSG
HP_TURRICEPHALY	HP_TURRICEPHALY	HP_TURRICEPHALY	20	-0.540526	-2.14805	0.000721754	0.0150581	0.0126477	2519	tags=70%, list=30%, signal=49%	ARVCF/ZIC1/FAM20C/FGFR3/SOX6/P4HB/POR/RECQL4/RREB1/MEGF8/COMT/GPX4/KDM4B/PEX5
WONG_EMBRYONIC_STEM_CELL_CORE	WONG_EMBRYONIC_STEM_CELL_CORE	WONG_EMBRYONIC_STEM_CELL_CORE	155	-0.319629	-2.14424	4.6e-06	0.000253882	0.000213242	3103	tags=59%, list=37%, signal=38%	FGFR1/MYBL2/PUS1/EIF3K/APEX1/CTNNA1/RNPS1/MRTO4/ALDOC/MYC/NOP10/NCAPH/EXOSC7/BANF1/ACAD8/COX5B/FARSA/TGIF1/CDKN1C/RCC2/PRDX1/TIMM8B/MRPS2/TRIP13/KIF22/POLR2F/MRPS28/ECHS1/EIF6/DPP3/EMC8/UQCR11/HADH/RUVBL2/TCF19/UQCRH/GTSE1/EIF3L/TCF7L1/RPS12/TIMM44/NDUFAB1/FH/RPSA/NIPSNAP1/NT5DC2/RCC1/TGIF2/BIRC5/VRK1/RPS19/POLR3K/MCM3/NME4/SNRPA/AMOTL2/DTYMK/NHP2/MCM5/WDR77/FBL/STOML2/PSMB5/PRMT1/CCNF/CSRP2/MCM7…
HP_ABNORMAL_CIRCULATING_CARBOHYDRATE_CONCENTRATION	HP_ABNORMAL_CIRCULATING_CARBOHYDRATE_CONCENTRATION	HP_ABNORMAL_CIRCULATING_CARBOHYDRATE_CONCENTRATION	25	-0.499688	-2.14309	0.000586928	0.012659	0.0106327	984	tags=48%, list=12%, signal=42%	NDUFAF3/NDUFS8/NDUFV1/ITPR3/PC/GALE/SORD/GALK1/LONP1/NDUFA11/NDUFB11/NDUFS7
REACTOME_M_PHASE	REACTOME_M_PHASE	REACTOME_M_PHASE	182	-0.314289	-2.14264	6.58e-07	4.44e-05	3.73e-05	1640	tags=33%, list=20%, signal=27%	B9D2/H3C14/NUP62/NUP188/RCC1/BIRC5/VRK1/PPP2R1B/RANGAP1/TUBGCP2/PSMB1/TUBB2A/UBA52/H4C5/PPP2R5B/ANAPC2/NUP210/CHMP6/TUBB3/CEP72/TUBGCP6/RAB1B/H4C2/H2BC5/PSMB5/ESPL1/H2AC14/H4C3/ACTR1A/SPC24/H2AC6/CENPM/H3C2/TUBB/PSMA7/SSNA1/H4-16/TUBA1B/H4C15/H2BC11/PPP2R1A/H4C1/H4C13/TUBB4B/MZT2A/H2BC17/H2AC8/H2BC8/NCAPH2/H3C11/ANAPC11/MZT2B/H2AC4/H2BC13/H3C1/H3C13/H4C8/H3C10/H3C12/H3C6
BURTON_ADIPOGENESIS_PEAK_AT_16HR	BURTON_ADIPOGENESIS_PEAK_AT_16HR	BURTON_ADIPOGENESIS_PEAK_AT_16HR	21	-0.525467	-2.14	0.000690278	0.0145415	0.0122138	1896	tags=57%, list=23%, signal=44%	PGP/FEN1/MCM3/MCM5/MCM6/GRWD1/IFRD2/MCM7/DNMT1/FAM111A/ASF1B/POLD1
HAMAI_APOPTOSIS_VIA_TRAIL_DN	HAMAI_APOPTOSIS_VIA_TRAIL_DN	HAMAI_APOPTOSIS_VIA_TRAIL_DN	91	-0.357308	-2.13866	8.75e-05	0.00294329	0.00247215	3258	tags=68%, list=39%, signal=42%	PARD6G/BEGAIN/STK16/RPP25/NMB/SSTR2/PLTP/ALDOC/SCLY/SGSH/ZNF629/PACSIN3/RPP25L/SLC1A5/TMEM42/CYBA/PPP1R14A/LINC01006/OTUD7A/SNAPC2/STEAP3/TRAC/SYNGR4/ASPHD1/PTPRF/TRAF4/ARRB1/EMILIN1/ISG15/PCK2/ECHDC3/INF2/ISYNA1/PNPLA6/PAGR1/TAOK2/SLCO4A1/IL4R/POMK/VCP/GRWD1/MTA1/KMT5C/VASP/FBLN1/ADRA2C/GTPBP3/SLC27A5/NLE1/PYCR1/SLC5A6/LRRC14/MAPK8IP2/H1-10/MAOA/CHMP1A/FZR1/H2AC8/CCDC85B/SPHK1/TERT/CDC34
HP_SYMPTOMATIC_SEIZURES	HP_SYMPTOMATIC_SEIZURES	HP_SYMPTOMATIC_SEIZURES	13	-0.627242	-2.13721	0.000689724	0.0145415	0.0122138	1232	tags=62%, list=15%, signal=53%	AKT2/UCP2/KCNJ11/SLC37A4/FAM111A/ABCC8/INSR/CYP27B1
REACTOME_NONSENSE_MEDIATED_DECAY_NMD	REACTOME_NONSENSE_MEDIATED_DECAY_NMD	REACTOME_NONSENSE_MEDIATED_DECAY_NMD	51	-0.406604	-2.1344	0.000289027	0.00732923	0.00615602	2029	tags=49%, list=24%, signal=37%	SMG5/EIF4A3/RPL39/RPL39L/RPLP2/UPF1/RPS12/RPSA/RPS9/RPS21/RPS14/RPS19/RPL10/UBA52/RPL3/RPLP0/RPL29/RPL23A/RPL18A/RPS5/RPL13/PPP2R1A/RPS29/RPS15/RPS28
REACTOME_DNA_DOUBLE_STRAND_BREAK_REPAIR	REACTOME_DNA_DOUBLE_STRAND_BREAK_REPAIR	REACTOME_DNA_DOUBLE_STRAND_BREAK_REPAIR	80	-0.366237	-2.13431	7.64e-05	0.00260286	0.00218621	1713	tags=38%, list=21%, signal=30%	SPIDR/MUS81/FEN1/POLD2/POLE4/POLL/TOP3A/UBA52/H4C5/EME2/H4C2/H2BC5/POLE/ABL1/H4C3/PPP4C/H4-16/PIAS4/H4C15/H2BC11/H4C1/H4C13/KDM4B/H2BC17/SIRT6/H2BC8/POLD1/XRCC3/H2BC13/H4C8
MATTIOLI_MGUS_VS_PCL	MATTIOLI_MGUS_VS_PCL	MATTIOLI_MGUS_VS_PCL	49	-0.412378	-2.12846	0.000304062	0.00758615	0.00637182	2061	tags=49%, list=25%, signal=37%	AP3D1/SSR4/TUBA1A/RRP9/ITPA/NUP62/GADD45B/JUNB/FADD/NUP210/EXOSC4/MCM5/ESYT1/MCM6/SMARCA4/CORO1A/TBRG4/CAD/TUBB/TUBA1B/MCM2/LAPTM4B/KIF21B/WDR18
KEGG_DNA_REPLICATION	KEGG_DNA_REPLICATION	KEGG_DNA_REPLICATION	19	-0.54665	-2.12801	0.0015113	0.025797	0.0216676	1707	tags=58%, list=20%, signal=46%	RNASEH2A/FEN1/POLD2/POLE4/MCM3/MCM5/MCM6/POLE/MCM7/MCM2/POLD1
GOBP_PYRIMIDINE_CONTAINING_COMPOUND_CATABOLIC_PROCESS	GOBP_PYRIMIDINE_CONTAINING_COMPOUND_CATABOLIC_PROCESS	GOBP_PYRIMIDINE_CONTAINING_COMPOUND_CATABOLIC_PROCESS	14	-0.601262	-2.1249	0.0008418	0.0168484	0.0141515	2747	tags=86%, list=33%, signal=58%	SMUG1/NT5C/NEIL2/NEIL1/CRMP1/DPYSL5/UNG/NT5M/DPYSL3/NTHL1/DPYSL4/DCTPP1
HP_OPISTHOTONUS	HP_OPISTHOTONUS	HP_OPISTHOTONUS	14	-0.601182	-2.12461	0.0008418	0.0168484	0.0141515	2322	tags=79%, list=28%, signal=57%	CARS2/SETBP1/EXTL3/GLYCTK/PSAP/MOCS1/TSEN54/ACP2/FUZ/CRLF1/GCDH
HALLMARK_MYC_TARGETS_V2	HALLMARK_MYC_TARGETS_V2	HALLMARK_MYC_TARGETS_V2	29	-0.471247	-2.1237	0.000978882	0.0186608	0.0156737	2056	tags=55%, list=25%, signal=42%	SLC29A2/MAP3K6/RRP9/PPAN/PPRC1/MCM5/UNG/GRWD1/DUSP2/TBRG4/EXOSC5/SORD/BYSL/SLC19A1/CDK4/DCTPP1
REACTOME_GLUCOSE_METABOLISM	REACTOME_GLUCOSE_METABOLISM	REACTOME_GLUCOSE_METABOLISM	42	-0.426188	-2.12164	0.000297154	0.00744811	0.00625588	3059	tags=71%, list=37%, signal=45%	PPP2R5D/NUP42/ALDOC/MDH1/PGK1/GAPDH/NUP133/GOT2/ADPGK/PFKP/ENO2/MDH2/PGP/NUP93/PRKACB/NUP85/NUP62/NUP188/PCK2/SLC25A1/PPP2R1B/SLC25A11/NUP210/SLC25A10/PFKM/TPI1/PC/SLC37A4/PPP2R1A/PFKL
GOBP_NUCLEOSIDE_TRIPHOSPHATE_BIOSYNTHETIC_PROCESS	GOBP_NUCLEOSIDE_TRIPHOSPHATE_BIOSYNTHETIC_PROCESS	GOBP_NUCLEOSIDE_TRIPHOSPHATE_BIOSYNTHETIC_PROCESS	43	-0.423078	-2.12049	0.000485011	0.0110795	0.00930601	1476	tags=44%, list=18%, signal=37%	PINK1/UCKL1/VPS9D1/NME4/DTYMK/VCP/ATP5F1A/NUDT2/STOML2/ATP5F1E/ANTKMT/SPHK2/UCK2/UQCC3/CAD/UCK1/NME3/ATP5F1D/TMSB4X
RASHI_RESPONSE_TO_IONIZING_RADIATION_3	RASHI_RESPONSE_TO_IONIZING_RADIATION_3	RASHI_RESPONSE_TO_IONIZING_RADIATION_3	14	-0.599755	-2.11957	0.0008418	0.0168484	0.0141515	2251	tags=71%, list=27%, signal=52%	ZNF358/IMPA2/ACTB/ABCC1/MAPK8IP3/WWC1/MICOS13/PCSK4/TAF1C/TRABD
GOBP_NEGATIVE_REGULATION_OF_MEGAKARYOCYTE_DIFFERENTIATION	GOBP_NEGATIVE_REGULATION_OF_MEGAKARYOCYTE_DIFFERENTIATION	GOBP_NEGATIVE_REGULATION_OF_MEGAKARYOCYTE_DIFFERENTIATION	14	-0.5978	-2.11266	0.000875137	0.0173236	0.0145505	1367	tags=79%, list=16%, signal=66%	H4C11/H4C12/H4C5/H4C2/PRMT1/H4C3/H4-16/H4C15/H4C1/H4C13/H4C8
GOBP_REGULATION_OF_PROTON_TRANSPORT	GOBP_REGULATION_OF_PROTON_TRANSPORT	GOBP_REGULATION_OF_PROTON_TRANSPORT	10	-0.678819	-2.11106	0.0006147	0.0131076	0.0110094	1799	tags=80%, list=22%, signal=63%	ACTN4/PARK7/PPIF/TESC/ANTKMT/SPHK2/PHB2/TMSB4X
REACTOME_CHOLESTEROL_BIOSYNTHESIS	REACTOME_CHOLESTEROL_BIOSYNTHESIS	REACTOME_CHOLESTEROL_BIOSYNTHESIS	14	-0.595912	-2.10599	0.000925144	0.0179203	0.0150518	778	tags=43%, list=9%, signal=39%	CYP51A1/FDPS/DHCR7/DHCR24/LSS/MVK
GOBP_MITOCHONDRIAL_TRANSPORT	GOBP_MITOCHONDRIAL_TRANSPORT	GOBP_MITOCHONDRIAL_TRANSPORT	80	-0.361042	-2.10404	0.000104625	0.00338174	0.00284042	2694	tags=52%, list=32%, signal=36%	HIP1R/SLC35F6/BAP1/STARD3/TIMM8B/MIPEP/RTL10/AIFM1/SREBF2/MTX2/TIMM22/SAE1/BCL2L1/HTRA2/BCL2L2/ZNF205/UBE2J2/TIMM44/MICALL2/TOMM40/PINK1/FIS1/BID/MUL1/PPIF/ATP5F1A/TIMM50/STOML2/ATP5F1E/ANTKMT/SLC25A10/BAD/TIMM29/SREBF1/RHOT2/ATP5F1D/BOK/TIMM17B/UBL5/ROMO1/ALKBH7/TIMM13
WP_CYTOPLASMIC_RIBOSOMAL_PROTEINS	WP_CYTOPLASMIC_RIBOSOMAL_PROTEINS	WP_CYTOPLASMIC_RIBOSOMAL_PROTEINS	43	-0.419543	-2.10277	0.000589226	0.012659	0.0106327	1869	tags=49%, list=22%, signal=38%	RPL39/RPLP2/RPS12/RPSA/RPS9/RPS21/RPS14/RPS19/RPL10/UBA52/RPL3/RPLP0/RPL29/RPL23A/RPS6KA2/RPL18A/RPS5/RPL13/RPS29/RPS15/RPS28
REACTOME_CELLULAR_RESPONSES_TO_STIMULI	REACTOME_CELLULAR_RESPONSES_TO_STIMULI	REACTOME_CELLULAR_RESPONSES_TO_STIMULI	357	-0.277001	-2.10239	9e-09	9.75e-07	8.19e-07	3049	tags=52%, list=37%, signal=35%	ATP6V0D1/CDKN2D/TUBA4B/RPS18/NUP42/HIF3A/SCMH1/TNFRSF21/MAP2K3/ATP6V1H/DDX11/COX7C/PSMD2/EXOSC7/ATOX1/MAP2K6/ACD/MEF2D/MAPKAPK3/GPX3/RPL13A/RPS19BP1/MAFK/RPL36/COX5B/EXOSC2/ANAPC15/HSBP1/ADD1/LIMD1/HIKESHI/H4C14/ATP6V1B2/PRDX1/H2AX/NUP133/CYBA/GRB10/H2AZ1/FKBP4/PSMB4/PRDX5/AJUBA/EGLN1/RPL18/DCTN2/RPTOR/PRDX6/DYNC1H1/CASTOR1/PRDX3/PDIA5/FAU/H4C11/H2AC20/H4C12/H2BC21/PSMB3/HMGA2/SCO2/CDK2/CAMK2G/DN…
REACTOME_RESPONSE_OF_EIF2AK4_GCN2_TO_AMINO_ACID_DEFICIENCY	REACTOME_RESPONSE_OF_EIF2AK4_GCN2_TO_AMINO_ACID_DEFICIENCY	REACTOME_RESPONSE_OF_EIF2AK4_GCN2_TO_AMINO_ACID_DEFICIENCY	45	-0.415972	-2.09933	0.000478287	0.010968	0.00921235	1869	tags=47%, list=22%, signal=36%	RPL39/RPL39L/RPLP2/RPS12/RPSA/RPS9/RPS21/RPS14/RPS19/RPL10/UBA52/RPL3/RPLP0/RPL29/RPL23A/RPL18A/RPS5/RPL13/RPS29/RPS15/RPS28
REACTOME_FACTORS_INVOLVED_IN_MEGAKARYOCYTE_DEVELOPMENT_AND_PLATELET_PRODUCTION	REACTOME_FACTORS_INVOLVED_IN_MEGAKARYOCYTE_DEVELOPMENT_AND_PLATELET_PRODUCTION	REACTOME_FACTORS_INVOLVED_IN_MEGAKARYOCYTE_DEVELOPMENT_AND_PLATELET_PRODUCTION	68	-0.375504	-2.098	0.000199919	0.00555057	0.00466208	1989	tags=43%, list=24%, signal=33%	CDK2/CAPZB/TUBA1A/KIFC2/ITPK1/PRKACB/H3C14/ACTB/CABLES1/TUBB2A/CARMIL1/TUBB3/PRKAR1B/ABL1/KIF26A/KIF12/H3C2/TUBA1B/TUBB4B/KIF19/KIF21B/DOCK8/HMG20B/H3C11/H3C1/H3C13/H3C10/H3C12/H3C6
MARTENS_TRETINOIN_RESPONSE_UP	MARTENS_TRETINOIN_RESPONSE_UP	MARTENS_TRETINOIN_RESPONSE_UP	267	-0.288916	-2.09519	1.21e-07	1e-05	8.42e-06	2398	tags=46%, list=29%, signal=34%	ITPRIPL1/COX4I2/STRA6/SOX8/PLIN5/FAM20C/CXCL14/EFNA2/UNC5A/HRAS/IFI27L2/SH2D5/HTR1B/KCNC1/CCM2L/LMO1/TTLL4/HOOK2/CDH24/ELOF1/HS3ST6/ZNF749/ENO2/MRPL36/CBARP/PTPRF/ALDH1B1/OLFM1/EMC10/SPATA20/ZNF439/HRH3/AMER3/SNCB/SIX6/FGFR4/UNC119/DEPP1/CHRNB4/BCAN/ECHDC3/WNK2/MSI1/MYO7A/ICAM4/KCNJ4/PAK4/GNGT1/NAPRT/DENND6B/IFT27/MMP15/MXD4/GRM2/HPCAL1/RNF215/IGFBPL1/TMSB10/AKT2/NMUR1/SLC6A17/NRBP2/CELSR2/KLHDC8…
HP_APLASIA_HYPOPLASIA_AFFECTING_THE_FUNDUS	HP_APLASIA_HYPOPLASIA_AFFECTING_THE_FUNDUS	HP_APLASIA_HYPOPLASIA_AFFECTING_THE_FUNDUS	45	-0.415131	-2.09509	0.000525719	0.0117371	0.0098583	1857	tags=47%, list=22%, signal=36%	POMT2/LHX4/SIX6/ABCA4/GPR161/DNMT3A/ATAD3A/CDON/TUBB3/POMK/GMPPB/CACNA1F/HPS6/OTX2/LARGE1/PDE6H/SALL4/HMX1/PPP2R1A/PUF60/MAP2K2
LOPEZ_MBD_TARGETS	LOPEZ_MBD_TARGETS	LOPEZ_MBD_TARGETS	437	-0.266394	-2.0935	1.51e-08	1.54e-06	1.29e-06	2196	tags=39%, list=26%, signal=30%	NCAM1/USP20/SPTAN1/UQCR11/RARA/NDUFC1/CDK5/TMEM53/SREBF2/ATP5MC2/TKFC/COMMD1/DECR2/PSMB3/PTTG1IP/SLC29A2/RNF121/GSTM3/CDK2/VTN/SERINC2/PTPRF/CAPZB/TUBA1A/SFXN4/CYB561A3/MAST2/SLC43A1/RHOB/QSOX1/CAPN1/ENKD1/UPF1/CD99L2/ACTN4/COQ4/MAP3K10/NDUFAB1/SNAP47/ANO6/WDR82/SPIDR/FGFR4/CTPS1/MBTPS1/TRAPPC9/MUS81/MICALL2/TOMM40/CLUH/GADD45B/RACK1/RPS21/NDUFS8/POLE4/PRKCSH/RPS14/BIRC5/CORO2A/VRK1/NUBP2/CFL1/TL…
FRASOR_RESPONSE_TO_SERM_OR_FULVESTRANT_DN	FRASOR_RESPONSE_TO_SERM_OR_FULVESTRANT_DN	FRASOR_RESPONSE_TO_SERM_OR_FULVESTRANT_DN	28	-0.470874	-2.09214	0.00115815	0.0213823	0.0179596	1343	tags=64%, list=16%, signal=54%	RFC2/POLA2/H2AX/MTHFD1/TTLL4/RNASEH2A/MCM3/MCM5/MCM6/POLE/MCM7/CHAF1A/MCM2/E2F1/RNF126/NUDT1/POLRMT/TK1
GOCC_ORGANELLE_INNER_MEMBRANE	GOCC_ORGANELLE_INNER_MEMBRANE	GOCC_ORGANELLE_INNER_MEMBRANE	242	-0.291195	-2.09015	2.34e-07	1.85e-05	1.56e-05	2405	tags=43%, list=29%, signal=31%	MRPL55/COX4I2/GCAT/TMEM177/MRPS28/IFFO1/TRAP1/CDS2/MRPL57/MRPS16/ERAL1/COA1/UQCR11/ATP5MC3/HIGD2A/NDUFC1/AIFM1/MTX2/ATP5MC2/TIMM22/PET100/AFG3L2/CHCHD6/NRM/ADCK1/SCO2/MRPL36/BCL2L1/UQCRH/SFXN4/MRPS34/AURKAIP1/COQ4/TIMM44/NDUFAB1/MPV17L2/MRPS12/NDUFAF3/NDUFB2/TOMM40/NDUFS8/SLC25A1/ATAD3B/RCC1L/NDUFA3/PINK1/PGS1/SLC25A11/UQCC2/ATAD3A/DHRS13/NME4/MTLN/MRPS7/ABCB8/COX8A/ATP5F1A/TIMM50/RDH13/UCP2/STOM…
SIG_CD40PATHWAYMAP	SIG_CD40PATHWAYMAP	SIG_CD40PATHWAYMAP	14	-0.590727	-2.08767	0.00112517	0.0209696	0.0176129	1020	tags=57%, list=12%, signal=50%	TONSL/TRAF2/MAPK11/MAP2K7/MAPK8IP3/MAPK12/TRAF3/MAPK8IP2
BLANCO_MELO_HUMAN_PARAINFLUENZA_VIRUS_3_INFECTION_A594_CELLS_DN	BLANCO_MELO_HUMAN_PARAINFLUENZA_VIRUS_3_INFECTION_A594_CELLS_DN	BLANCO_MELO_HUMAN_PARAINFLUENZA_VIRUS_3_INFECTION_A594_CELLS_DN	55	-0.390929	-2.08693	0.000403845	0.00961063	0.00807223	2166	tags=51%, list=26%, signal=38%	FGFR3/ADM5/SYNGR4/HS3ST6/LINC02593/CACFD1/ARRB1/FGFR4/CAMSAP3/HSD17B8/LLGL2/VWA1/NUDT16L1/SHC2/MCF2L/NPW/CHTF18/C21orf58/SPC24/CAPS/KIF12/DIPK1B/SLC29A4/SEMA6B/TJP3/CERS4/ZNF219/RAB26
HP_ABNORMAL_BRAINSTEM_MORPHOLOGY	HP_ABNORMAL_BRAINSTEM_MORPHOLOGY	HP_ABNORMAL_BRAINSTEM_MORPHOLOGY	120	-0.327745	-2.08598	5.14e-05	0.00190433	0.0015995	2448	tags=50%, list=29%, signal=36%	ABCD1/ZIC1/PTCH1/ETHE1/DYNC1H1/FGFR3/VPS4A/EXOC7/ARL3/SMPD4/SPTAN1/AIFM1/SCO2/DNM1/TUBA1A/NAGA/TOE1/POMT2/TRAF7/TSEN34/FH/NDUFAF3/FARS2/NDUFS8/VRK1/PIGS/CUX2/TUBB2A/BRF1/CDON/TUBB3/TSEN54/POMK/GMPPB/FCSK/LAMB1/STUB1/NDUFV1/DLL1/INPP5E/GAS1/AKT1/AHCY/GTPBP3/DNMT1/LARGE1/SLC5A6/TUBB/FUZ/PPP2R1A/CHMP1A/DISP1/B4GAT1/MAST1/TERT/NDUFA11/VPS51/NDUFB11/NDUFS7/LAMA2
JOHNSTONE_PARVB_TARGETS_2_UP	JOHNSTONE_PARVB_TARGETS_2_UP	JOHNSTONE_PARVB_TARGETS_2_UP	72	-0.368543	-2.0851	0.000150875	0.00442731	0.00371862	2207	tags=56%, list=26%, signal=41%	GNAI2/SPTAN1/GPR137/GSTM3/BCL2L1/LY6E/GRINA/G6PD/HGS/CORO1B/BRD9/ISG15/GRAMD1B/CLPTM1L/SLC25A1/CALR/CFL1/ACTB/USP11/FASN/ERGIC3/FLNA/NSMF/TFPI2/ACTG1/RAMP1/HLA-A/WWC1/PTPA/SBNO2/RAB11B/AKR1B1/AGPAT2/SLC4A2/SCAMP4/COTL1/TNFAIP3/PKN1/BSG/CD151
HALLMARK_OXIDATIVE_PHOSPHORYLATION	HALLMARK_OXIDATIVE_PHOSPHORYLATION	HALLMARK_OXIDATIVE_PHOSPHORYLATION	101	-0.339109	-2.07384	6.24e-05	0.00220715	0.00185385	3772	tags=74%, list=45%, signal=41%	GRPEL1/OGDH/COX5A/PMPCA/ETFB/SURF1/UQCRFS1/MRPL11/HADHA/SLC25A3/ATP5PD/MFN2/COX4I1/MRPL15/COX6C/CYB5A/GLUD1/ATP5F1B/OXA1L/TIMM10/UQCR10/CYB5R3/ATP6V1H/COX7C/MDH1/ACAA1/HADHB/COX5B/TIMM8B/GOT2/POLR2F/ECHS1/PRDX3/ATP6AP1/UQCR11/ATP5MC3/NDUFC1/AIFM1/MTX2/ATP5MC2/AFG3L2/MDH2/UQCRH/HTRA2/POR/NDUFAB1/FH/MRPS12/NDUFB2/NDUFS8/NDUFA3/SLC25A11/ATP6V0B/IDH1/COX8A/ATP5F1A/TIMM50/DLST/ATP5F1E/HSD17B10/NDUFV1/…
GOBP_MITOCHONDRIAL_MEMBRANE_ORGANIZATION	GOBP_MITOCHONDRIAL_MEMBRANE_ORGANIZATION	GOBP_MITOCHONDRIAL_MEMBRANE_ORGANIZATION	49	-0.401719	-2.07344	0.000515266	0.0115753	0.00972243	2239	tags=53%, list=27%, signal=39%	RTL10/MTX2/TIMM22/AFG3L2/CHCHD6/ADCK1/BCL2L1/BCL2L2/ZNF205/RCC1L/PINK1/BID/MUL1/PPIF/TIMM50/UQCC3/BAD/LETM1/TIMM29/MICOS13/RHOT2/BOK/PEX5/ROMO1/ALKBH7/TIMM13
GOCC_LARGE_RIBOSOMAL_SUBUNIT	GOCC_LARGE_RIBOSOMAL_SUBUNIT	GOCC_LARGE_RIBOSOMAL_SUBUNIT	50	-0.39707	-2.07262	0.000362577	0.00880264	0.00739358	2821	tags=58%, list=34%, signal=39%	MRPL40/RPL13A/RPL36/MRPL30/MRPL52/MRPL55/RPL18/MRPL57/MRPL36/RPL39/RPL39L/RPLP0P6/RPLP2/MPV17L2/RPL10/UBA52/RPL3/RPLP0/RPL29/RPL23A/RPL18A/MRPL4/MRPL28/MRPL14/RPL13/MRPL41/MRPL23/MRPL12/MRPL54
CUI_TCF21_TARGETS_2_UP	CUI_TCF21_TARGETS_2_UP	CUI_TCF21_TARGETS_2_UP	222	-0.29276	-2.07118	1.05e-06	6.67e-05	5.6e-05	1732	tags=36%, list=21%, signal=29%	RPSA/NFATC4/NIPSNAP1/UNC119/NT5DC2/POLD2/RPS9/MSI1/RACK1/APCDD1/ACTB/CAMSAP3/SELENOW/ATAD3A/BZW2/NRP2/MCM3/PIH1D1/SUMO3/DTYMK/MCM5/PYCR3/CENPV/SKP2/IGSF8/ELP5/MEIS1/EFS/DGCR6L/RELT/GRWD1/PRKAR1B/MATN2/ECHDC2/TBRG4/ESPL1/TAF6L/MCM7/PIMREG/APRT/TMEM132A/CAD/MYCN/COL8A2/PYCR1/SPC24/EXOSC5/PAFAH1B3/AKR7A2/AMER2/DIPK1B/CENPX/LRFN4/ARHGAP39/MAOA/GALK1/B4GALT2/PALM/GUK1/C19orf25/BOK/PDLIM4/PRDX2/SNRPB/D…
GOBP_TELOMERE_ORGANIZATION	GOBP_TELOMERE_ORGANIZATION	GOBP_TELOMERE_ORGANIZATION	74	-0.36153	-2.06805	0.000140442	0.00422419	0.00354801	1375	tags=30%, list=16%, signal=25%	DOT1L/H4C5/NHP2/RECQL4/H4C2/MAP2K7/H4C3/H3C2/H4-16/H4C15/H4C1/H4C13/SIRT6/TERT/XRCC3/H3C11/TELO2/H3C1/H4C8/H3C10/H3C12/H3C6
HP_HYPOPLASIA_OF_THE_PONS	HP_HYPOPLASIA_OF_THE_PONS	HP_HYPOPLASIA_OF_THE_PONS	36	-0.433566	-2.06321	0.00121534	0.02208	0.0185456	1931	tags=64%, list=23%, signal=49%	MDH1/TRAPPC12/TGIF1/ZIC1/PTCH1/TOE1/POMT2/VRK1/PIGS/BRF1/CDON/TSEN54/POMK/GMPPB/STUB1/DLL1/GAS1/AHCY/LARGE1/SLC5A6/PPP2R1A/DISP1/VPS51
SHIPP_DLBCL_VS_FOLLICULAR_LYMPHOMA_UP	SHIPP_DLBCL_VS_FOLLICULAR_LYMPHOMA_UP	SHIPP_DLBCL_VS_FOLLICULAR_LYMPHOMA_UP	16	-0.550876	-2.06258	0.0019493	0.0310397	0.0260711	3760	tags=100%, list=45%, signal=55%	HCK/CCT3/HMGA1/PSME2/EXOSC7/CCNB1/SLC1A5/PRDX1/TRAP1/PFKP/P4HB/MCM7/CTSD/SNRPB/THOP1
GOBP_PYRIMIDINE_NUCLEOSIDE_TRIPHOSPHATE_METABOLIC_PROCESS	GOBP_PYRIMIDINE_NUCLEOSIDE_TRIPHOSPHATE_METABOLIC_PROCESS	GOBP_PYRIMIDINE_NUCLEOSIDE_TRIPHOSPHATE_METABOLIC_PROCESS	13	-0.604355	-2.05922	0.00128421	0.0228707	0.0192097	1696	tags=69%, list=20%, signal=55%	CTPS1/UCKL1/NME4/DTYMK/UCK2/CAD/UCK1/NME3/DCTPP1
GOBP_RIBONUCLEOSIDE_TRIPHOSPHATE_METABOLIC_PROCESS	GOBP_RIBONUCLEOSIDE_TRIPHOSPHATE_METABOLIC_PROCESS	GOBP_RIBONUCLEOSIDE_TRIPHOSPHATE_METABOLIC_PROCESS	44	-0.409972	-2.05882	0.000690278	0.0145415	0.0122138	2169	tags=50%, list=26%, signal=37%	ATP5MC3/ATP5MC2/ITPA/CTPS1/PINK1/UCKL1/VPS9D1/NME4/VCP/ATP5F1A/NUDT2/STOML2/ATP5F1E/ANTKMT/SPHK2/UCK2/UQCC3/CAD/UCK1/NME3/ATP5F1D/TMSB4X
MOOTHA_VOXPHOS	MOOTHA_VOXPHOS	MOOTHA_VOXPHOS	42	-0.41354	-2.05868	0.000589226	0.012659	0.0106327	2171	tags=50%, list=26%, signal=37%	UQCR11/ATP5MC3/NDUFC1/ATP5MC2/CBARP/BCL2L1/UQCRH/NDUFAB1/NDUFB2/NDUFS8/NDUFA3/COX8A/ATP5F1E/CYC1/UQCRQ/UQCRC1/NDUFA2/ATP5F1D/NDUFB7/NDUFS7/MBD3
REACTOME_RRNA_PROCESSING	REACTOME_RRNA_PROCESSING	REACTOME_RRNA_PROCESSING	91	-0.343921	-2.05853	0.0002351	0.00623936	0.00524061	1964	tags=42%, list=24%, signal=32%	RRP36/DHX37/RRP9/RPL39/RPL39L/RPLP2/RPS12/RPSA/RRP7A/RPS9/RPS21/RPS14/RPS19/DDX49/RPL10/UBA52/RPL3/RPLP0/NHP2/EXOSC4/RPL29/RRP1/FBL/RPL23A/TSR3/SENP3/HSD17B10/BOP1/TBL3/RPL18A/RPS5/EXOSC5/RPL13/BYSL/RPS29/RPS15/RPS28/WDR18
DACOSTA_UV_RESPONSE_VIA_ERCC3_TTD_UP	DACOSTA_UV_RESPONSE_VIA_ERCC3_TTD_UP	DACOSTA_UV_RESPONSE_VIA_ERCC3_TTD_UP	34	-0.43964	-2.05677	0.0012832	0.0228707	0.0192097	1679	tags=47%, list=20%, signal=38%	MRPS12/CBX2/CALR/MPDU1/FLNA/ERCC2/PPIF/STK25/BAD/MRPL28/UBL4A/GET3/GALK1/TLE5/EPOR/BSG
REACTOME_G2_M_CHECKPOINTS	REACTOME_G2_M_CHECKPOINTS	REACTOME_G2_M_CHECKPOINTS	69	-0.367519	-2.05609	0.000253655	0.00660234	0.00554549	3406	tags=70%, list=41%, signal=42%	RMI2/PSMB6/RPA1/RNF8/H2BC15/RAD9A/PSME2/MCM10/PSMD2/CDC45/CCNB1/RFC2/H4C14/H2AX/PSMB4/BABAM1/H4C11/H4C12/H2BC21/PSMB3/PKMYT1/CDK2/CDC25A/GTSE1/TOP3A/PSMB1/UBA52/H4C5/MCM3/MCM5/H4C2/MCM6/H2BC5/PSMB5/MCM7/H4C3/PSMA7/H4-16/PIAS4/MCM2/H4C15/H2BC11/H4C1/H4C13/H2BC17/H2BC8/H2BC13/H4C8
BLUM_RESPONSE_TO_SALIRASIB_DN	BLUM_RESPONSE_TO_SALIRASIB_DN	BLUM_RESPONSE_TO_SALIRASIB_DN	155	-0.306213	-2.05424	2.12e-05	0.00090506	0.000760185	2720	tags=51%, list=33%, signal=35%	SUV39H1/RFC2/POLA2/ID2/GTF2I/GALNT2/BRD3OS/H2AZ1/TRIP13/MTHFD1/KIF22/NARF/MIPEP/PRDX3/OAZ2/ATP5MC3/PIK3R3/COCH/PXMP2/PRSS23/GTF3C2/CDK2/SHMT1/MYLK/TUBA1A/CDC25A/ACACA/RNASEH2A/LPCAT3/FEN1/ISYNA1/VRK1/JUNB/TUBB2A/FASN/MCM3/NNAT/NME4/DTYMK/MCM5/RECQL4/SKP2/MCM6/TECR/ZNF443/DGCR2/SLC25A10/TPI1/MATN2/CCND3/CCNF/POLE/ESPL1/GINS2/RBX1/DNMT1/DDX39A/DPYSL3/NDUFA2/PAFAH1B3/CHAF1A/TUBB/FANCA/ENC1/NTHL1/MRP…
KOBAYASHI_EGFR_SIGNALING_24HR_DN	KOBAYASHI_EGFR_SIGNALING_24HR_DN	KOBAYASHI_EGFR_SIGNALING_24HR_DN	107	-0.330813	-2.05422	0.000118044	0.00366241	0.00307616	2045	tags=42%, list=24%, signal=32%	HMGA2/ENO2/PKMYT1/CDK2/TUBA1A/CDC25A/FABP5/GTSE1/RNASEH2A/CTPS1/FEN1/BIRC5/VRK1/RANGAP1/POLR3K/TUBB2A/SLCO4A1/MCM3/MCM5/UNG/PPIF/MCM6/GINS3/TFPI2/UCK2/CCND3/CCNF/ESPL1/GINS2/MCM7/PIMREG/DDX39A/H4C3/FAM111A/CHAF1A/CENPM/TUBB/CDCA4/MCM2/TUBB4B/ASF1B/SPHK1/E2F1/LMNB2/TK1
HP_ORGANIC_ACIDURIA	HP_ORGANIC_ACIDURIA	HP_ORGANIC_ACIDURIA	34	-0.438327	-2.05063	0.00139619	0.024322	0.0204287	2922	tags=62%, list=35%, signal=40%	PPOX/ACAD9/ACAD8/PRDX1/ETHE1/ACSF3/PCCB/HADH/GRHPR/DHTKD1/BTD/SLC25A1/FLAD1/MMAB/D2HGDH/HMBS/SLC52A2/MVK/ACADS/GCDH/CD320
REACTOME_SELENOAMINO_ACID_METABOLISM	REACTOME_SELENOAMINO_ACID_METABOLISM	REACTOME_SELENOAMINO_ACID_METABOLISM	51	-0.390545	-2.0501	0.000705665	0.0148368	0.0124618	1869	tags=45%, list=22%, signal=35%	RPL39/RPL39L/RPLP2/RPS12/RPSA/QARS1/RPS9/RPS21/RPS14/RPS19/RPL10/UBA52/RPL3/RPLP0/RPL29/RPL23A/RPL18A/AHCY/RPS5/RPL13/RPS29/RPS15/RPS28
REACTOME_EUKARYOTIC_TRANSLATION_INITIATION	REACTOME_EUKARYOTIC_TRANSLATION_INITIATION	REACTOME_EUKARYOTIC_TRANSLATION_INITIATION	53	-0.386576	-2.04916	0.000570187	0.0124225	0.010434	1870	tags=72%, list=22%, signal=56%	EIF3I/RPS10/RPL31/RPL4/EIF4EBP1/RPLP1/EIF4H/EIF3K/RPS18/EIF2B5/RPL13A/RPL36/EIF3B/RPL18/FAU/EIF3G/RPL39/RPL39L/RPLP2/EIF3L/RPS12/RPSA/RPS9/RPS21/RPS14/RPS19/RPL10/UBA52/RPL3/RPLP0/RPL29/RPL23A/RPL18A/RPS5/RPL13/RPS29/RPS15/RPS28
REACTOME_METABOLISM_OF_NUCLEOTIDES	REACTOME_METABOLISM_OF_NUCLEOTIDES	REACTOME_METABOLISM_OF_NUCLEOTIDES	41	-0.414464	-2.04844	0.000389458	0.00939209	0.00788868	2017	tags=51%, list=24%, signal=39%	AMPD2/TXN/ITPA/CTPS1/DCTD/UCKL1/NME4/DTYMK/PFAS/NT5M/UCK2/APRT/CAD/UCK1/DNPH1/NME3/GUK1/DCTPP1/ENTPD6/NUDT1/TK1
GOBP_OXIDATIVE_PHOSPHORYLATION	GOBP_OXIDATIVE_PHOSPHORYLATION	GOBP_OXIDATIVE_PHOSPHORYLATION	58	-0.379979	-2.04507	0.000297924	0.00745017	0.0062576	1743	tags=45%, list=21%, signal=36%	NDUFAB1/NDUFB2/NDUFS8/MIR210/NDUFA3/PINK1/UQCC2/BID/PARK7/VCP/PPIF/ATP5F1A/STOML2/ATP5F1E/ANTKMT/NDUFV1/SLC25A23/UQCC3/CHCHD2/CYC1/UQCRQ/UQCRC1/NDUFA2/ATP5F1D/NDUFB7/NDUFS7
HP_APLASIA_HYPOPLASIA_OF_THE_OPTIC_NERVE	HP_APLASIA_HYPOPLASIA_OF_THE_OPTIC_NERVE	HP_APLASIA_HYPOPLASIA_OF_THE_OPTIC_NERVE	31	-0.449167	-2.04367	0.000801885	0.0163827	0.0137603	1857	tags=52%, list=22%, signal=40%	POMT2/LHX4/SIX6/GPR161/DNMT3A/ATAD3A/CDON/TUBB3/POMK/GMPPB/OTX2/LARGE1/SALL4/PPP2R1A/PUF60/MAP2K2
CHNG_MULTIPLE_MYELOMA_HYPERPLOID_UP	CHNG_MULTIPLE_MYELOMA_HYPERPLOID_UP	CHNG_MULTIPLE_MYELOMA_HYPERPLOID_UP	26	-0.468986	-2.03848	0.00211271	0.0324488	0.0272547	3993	tags=92%, list=48%, signal=48%	IMP3/RPS6/RPL35A/RPS3/RPL4/RPLP1/EIF3K/SNRNP70/RPL13A/RPL36/DHPS/RPL18/EIF3G/RPLP2/RPSA/QARS1/RPS9/RPS14/RPS19/UBA52/RPL29/FBL/EEF2/RPS15
GOCC_DNA_REPLICATION_PREINITIATION_COMPLEX	GOCC_DNA_REPLICATION_PREINITIATION_COMPLEX	GOCC_DNA_REPLICATION_PREINITIATION_COMPLEX	10	-0.655389	-2.0382	0.00155924	0.0263805	0.0221577	1343	tags=70%, list=16%, signal=59%	MCM3/MCM5/MCM6/GINS3/GINS2/MCM7/MCM2
GOBP_PYRIMIDINE_NUCLEOSIDE_TRIPHOSPHATE_BIOSYNTHETIC_PROCESS	GOBP_PYRIMIDINE_NUCLEOSIDE_TRIPHOSPHATE_BIOSYNTHETIC_PROCESS	GOBP_PYRIMIDINE_NUCLEOSIDE_TRIPHOSPHATE_BIOSYNTHETIC_PROCESS	10	-0.655104	-2.03731	0.00155924	0.0263805	0.0221577	1696	tags=80%, list=20%, signal=64%	CTPS1/UCKL1/NME4/DTYMK/UCK2/CAD/UCK1/NME3
GOMF_S_ADENOSYLMETHIONINE_DEPENDENT_METHYLTRANSFERASE_ACTIVITY	GOMF_S_ADENOSYLMETHIONINE_DEPENDENT_METHYLTRANSFERASE_ACTIVITY	GOMF_S_ADENOSYLMETHIONINE_DEPENDENT_METHYLTRANSFERASE_ACTIVITY	61	-0.374796	-2.03675	0.000408096	0.0096905	0.00813932	1716	tags=43%, list=21%, signal=34%	WDR82/WDR5/NSUN5/PCMTD2/WDR4/DNMT3A/DOT1L/ICMT/FBLL1/TTLL12/COMTD1/TRMT61A/FBL/EHMT1/ANTKMT/KMT5C/PRMT1/PRMT8/COMT/PCIF1/DNMT1/CMTR1/TRMT1/CARM1/PEMT/GAMT
HP_OPTIC_NERVE_HYPOPLASIA	HP_OPTIC_NERVE_HYPOPLASIA	HP_OPTIC_NERVE_HYPOPLASIA	28	-0.457799	-2.03404	0.00200219	0.0313495	0.0263313	1857	tags=54%, list=22%, signal=42%	POMT2/LHX4/SIX6/GPR161/DNMT3A/ATAD3A/CDON/TUBB3/POMK/GMPPB/OTX2/LARGE1/PPP2R1A/PUF60/MAP2K2
HP_LEUKOENCEPHALOPATHY	HP_LEUKOENCEPHALOPATHY	HP_LEUKOENCEPHALOPATHY	98	-0.333308	-2.03231	0.000177393	0.00502829	0.0042234	2735	tags=55%, list=33%, signal=37%	KARS1/FARSA/ISCA2/HIKESHI/UBA1/DPM2/NOTCH3/RNASET2/ABCD1/DYNC1H1/AIFM1/SCP2/NAXE/SSR4/AMPD2/CIC/POMT2/CLN6/CPLX1/NDUFAF3/FGFRL1/PSAP/AP5Z1/NDUFS8/RPL10/BRF1/MARS2/TSEN54/ERCC2/MTHFR/GMPPB/LAMB1/NDUFV1/DLL1/ARSA/ATP13A2/AP4M1/HTRA1/LETM1/PC/LARGE1/COLGALT1/CTBP1/KIRREL3/DEAF1/BRSK2/GJC2/TRMT1/PUF60/LONP1/DOCK8/NDUFA11/NDUFB11/NDUFS7
REACTOME_FANCONI_ANEMIA_PATHWAY	REACTOME_FANCONI_ANEMIA_PATHWAY	REACTOME_FANCONI_ANEMIA_PATHWAY	16	-0.542525	-2.03132	0.00248243	0.0359836	0.0302236	1684	tags=56%, list=20%, signal=45%	MUS81/UBA52/EME2/FANCC/FANCG/FANCA/CENPX/FAAP20/FAAP100
ZAMORA_NOS2_TARGETS_DN	ZAMORA_NOS2_TARGETS_DN	ZAMORA_NOS2_TARGETS_DN	39	-0.414281	-2.02968	0.000934377	0.0179789	0.015101	1799	tags=46%, list=22%, signal=36%	ACTN4/CD81/EIF5A/ACTB/MGAT1/EFS/AP1B1/PPP1CA/DDB1/EEF2/SORD/TSPAN4/PPP2R1A/GALK1/ATP5F1D/LONP1/CD151/MAP2K2
WP_GLYCEROLIPIDS_AND_GLYCEROPHOSPHOLIPIDS	WP_GLYCEROLIPIDS_AND_GLYCEROPHOSPHOLIPIDS	WP_GLYCEROLIPIDS_AND_GLYCEROPHOSPHOLIPIDS	11	-0.62885	-2.02884	0.00247187	0.0359836	0.0302236	1401	tags=64%, list=17%, signal=53%	PTDSS1/AGPAT4/CDIPT/DGAT1/PTDSS2/PEMT/PCYT2
REACTOME_G2_M_DNA_DAMAGE_CHECKPOINT	REACTOME_G2_M_DNA_DAMAGE_CHECKPOINT	REACTOME_G2_M_DNA_DAMAGE_CHECKPOINT	41	-0.410182	-2.02727	0.000504626	0.0114312	0.00960135	1433	tags=37%, list=17%, signal=30%	TOP3A/H4C5/H4C2/H2BC5/H4C3/H4-16/PIAS4/H4C15/H2BC11/H4C1/H4C13/H2BC17/H2BC8/H2BC13/H4C8
HP_DECREASED_ACTIVITY_OF_MITOCHONDRIAL_COMPLEX_I	HP_DECREASED_ACTIVITY_OF_MITOCHONDRIAL_COMPLEX_I	HP_DECREASED_ACTIVITY_OF_MITOCHONDRIAL_COMPLEX_I	23	-0.484325	-2.02614	0.001256	0.0224794	0.018881	1643	tags=48%, list=20%, signal=39%	NDUFAF3/NDUFS8/TRMU/SLC25A10/NDUFV1/MIEF2/GTPBP3/MRPL12/NDUFA11/NDUFB11/NDUFS7
CROMER_METASTASIS_DN	CROMER_METASTASIS_DN	CROMER_METASTASIS_DN	33	-0.432948	-2.02607	0.00171449	0.0283861	0.0238422	2288	tags=58%, list=27%, signal=42%	ST6GALNAC2/PFKP/AFG3L2/IMPA2/MRPS12/UBE2M/TTLL12/ATP5F1A/TICAM1/FLAD1/GSTP1/PPP4C/DUSP7/SH3GL1/ATP5F1D/IGSF3/ALDH4A1/CKB/BAIAP2
SOTIRIOU_BREAST_CANCER_GRADE_1_VS_3_UP	SOTIRIOU_BREAST_CANCER_GRADE_1_VS_3_UP	SOTIRIOU_BREAST_CANCER_GRADE_1_VS_3_UP	63	-0.370121	-2.02586	0.000519226	0.0116401	0.00977687	2064	tags=46%, list=25%, signal=35%	QPRT/PKMYT1/CDK2/TUBA1A/CDC25A/TXN/GTSE1/NUP93/RNASEH2A/FEN1/BIRC5/VRK1/LAGE3/MCM3/ORMDL2/H4C2/MCM6/HMCES/ESPL1/PIMREG/DDX39A/SLC52A2/PSMA7/BYSL/TUBA1B/MCM2/MRPL12/E2F1/NUDT1
MOOTHA_PGC	MOOTHA_PGC	MOOTHA_PGC	193	-0.294422	-2.02471	8.58e-06	0.000424239	0.00035633	3064	tags=56%, list=37%, signal=36%	PUS1/HSPBP1/CDKN2D/UQCR10/DDIT4/MAP2K3/DHX16/COX7C/NOP10/ATP1A1/PHLDA1/MRPL40/HADHB/PGK1/SPSB2/COX5B/ID2/GAPDH/RANGRF/CIAO2B/FABP3/ARVCF/TIMM8B/TSPAN12/PMM1/POLDIP2/MRPS2/EGLN1/POLR2F/PRDX3/PFKP/RXRB/NCAM1/PGLS/RUVBL2/SPINT1/NDUFC1/AIFM1/MTX2/PRSS23/UNC119B/MDH2/SHMT1/MRPS34/TRAK2/ACOT7/AURKAIP1/EIF3L/ITPK1/TIMM44/NDUFAB1/SLC2A4/FH/PDXK/MRPS12/TOMM40/FARS2/GTPBP2/RANGAP1/CRMP1/FASTK/SLC25A11/BID/…
GOBP_REGULATION_OF_EXTRINSIC_APOPTOTIC_SIGNALING_PATHWAY_IN_ABSENCE_OF_LIGAND	GOBP_REGULATION_OF_EXTRINSIC_APOPTOTIC_SIGNALING_PATHWAY_IN_ABSENCE_OF_LIGAND	GOBP_REGULATION_OF_EXTRINSIC_APOPTOTIC_SIGNALING_PATHWAY_IN_ABSENCE_OF_LIGAND	17	-0.532855	-2.02362	0.00253408	0.0365426	0.0306932	1958	tags=65%, list=23%, signal=50%	BCL2L1/HTRA2/MAPK7/PPP2R1B/STRADB/PPP1CA/AKT1/SNAI2/PPP2R1A/PRDX2/TERT
REACTOME_TRANSLATION	REACTOME_TRANSLATION	REACTOME_TRANSLATION	130	-0.315626	-2.02345	5.87e-05	0.00209957	0.00176348	4001	tags=74%, list=48%, signal=39%	RPL3L/RPS6/RPL35A/MARS1/MRPS21/MRPL20/SSR2/RPS3/EIF3F/EEF1A1/AIMP2/PPA2/MRPL37/EIF3I/RPS10/TRMT112/MRPL11/RPL31/NARS2/SEC61B/RPL4/MRPL16/MRPL15/EIF4EBP1/RPLP1/EIF4H/OXA1L/EIF3K/RPS18/CHCHD1/EIF2B5/MRPL40/RPL13A/RPL36/KARS1/MRPL30/FARSA/MRPL52/EIF3B/MRPS2/MRPL55/RPL18/CARS2/MRPS28/MRPL57/MRPS16/FAU/ERAL1/SSR4/MRPL36/MRPS34/RPN2/EIF3G/RPL39/SARS2/RPL39L/AURKAIP1/VARS1/RPLP2/EIF3L/RPS12/RPSA/QARS1/A…
HP_ABNORMAL_PONS_MORPHOLOGY	HP_ABNORMAL_PONS_MORPHOLOGY	HP_ABNORMAL_PONS_MORPHOLOGY	47	-0.396695	-2.02142	0.000717491	0.0149981	0.0125973	2684	tags=57%, list=32%, signal=39%	TRAPPC12/TGIF1/ZIC1/PTCH1/VPS4A/ARL3/TOE1/POMT2/TSEN34/VRK1/PIGS/BRF1/CDON/TSEN54/POMK/GMPPB/STUB1/DLL1/INPP5E/GAS1/AHCY/LARGE1/SLC5A6/PPP2R1A/DISP1/VPS51/LAMA2
GOBP_PIGMENT_BIOSYNTHETIC_PROCESS	GOBP_PIGMENT_BIOSYNTHETIC_PROCESS	GOBP_PIGMENT_BIOSYNTHETIC_PROCESS	16	-0.539829	-2.02122	0.00261571	0.0373653	0.0313842	705	tags=38%, list=8%, signal=34%	APRT/HMBS/CITED1/OPN3/GIPC1/MFSD12
GOCC_NUCLEAR_CHROMOSOME	GOCC_NUCLEAR_CHROMOSOME	GOCC_NUCLEAR_CHROMOSOME	111	-0.324029	-2.02113	0.000125162	0.00383923	0.00322468	1782	tags=33%, list=21%, signal=27%	LRWD1/RGS12/SPIDR/POLD2/RCC1/POLE4/BIRC5/ACTR5/H4C5/MCM3/MCM5/H4C2/MCM6/GINS3/TONSL/REPIN1/POLE/GINS2/MCM7/H4C3/REC8/H3C2/H4-16/MCM2/H4C15/H4C1/CHMP1A/H4C13/MCRS1/POLD1/H3C11/H3C1/TTN/H4C8/H3C10/H3C12/H3C6
HP_DIFFUSE_CEREBRAL_ATROPHY	HP_DIFFUSE_CEREBRAL_ATROPHY	HP_DIFFUSE_CEREBRAL_ATROPHY	24	-0.475302	-2.02032	0.00200639	0.0313495	0.0263313	1961	tags=58%, list=23%, signal=45%	GRIN2A/PNKP/BTD/PSAP/FARS2/NEUROD2/GLB1/HSD17B10/PRKAR1B/SLC25A22/ATP13A2/UQCRC1/VPS16/PIGQ
KIM_BIPOLAR_DISORDER_OLIGODENDROCYTE_DENSITY_CORR_UP	KIM_BIPOLAR_DISORDER_OLIGODENDROCYTE_DENSITY_CORR_UP	KIM_BIPOLAR_DISORDER_OLIGODENDROCYTE_DENSITY_CORR_UP	328	-0.268101	-2.01783	2.49e-07	1.95e-05	1.64e-05	2893	tags=52%, list=35%, signal=35%	GABARAP/GPR162/PSMD2/PEBP1/KBTBD11/ATOX1/HAGH/MRPL40/PISD/ANXA6/PMVK/PGK1/FARSA/HSBP1/AP3M2/ADD1/CORO2B/NUDT3/SNRPE/ATP6V1B2/SNN/TAF6/UBA1/BAP1/PRDX1/CLSTN1/RNF4/GOT2/SCAP/PSMB4/PMM1/LZTR1/TKT/PRDX6/SRSF9/ADRM1/ECHS1/DYNC1H1/TALDO1/TRIM28/HRAS/FGFR3/CAND2/TRAP1/EIF6/FAU/ATP6AP1/RNH1/KIF3C/RTL8C/ATP5MC3/GRHPR/NDUFC1/NCDN/CDK5/ITPKA/SPTBN2/PSMB3/RIMS3/SSR4/ENO2/CAMK2G/DNM1/UQCRH/MARCHF2/ADGRB2/P4HB…
REACTOME_SRP_DEPENDENT_COTRANSLATIONAL_PROTEIN_TARGETING_TO_MEMBRANE	REACTOME_SRP_DEPENDENT_COTRANSLATIONAL_PROTEIN_TARGETING_TO_MEMBRANE	REACTOME_SRP_DEPENDENT_COTRANSLATIONAL_PROTEIN_TARGETING_TO_MEMBRANE	52	-0.380553	-2.01746	0.00049952	0.0113392	0.00952411	2023	tags=46%, list=24%, signal=35%	SSR4/RPN2/RPL39/RPL39L/RPLP2/RPS12/RPSA/RPS9/RPS21/RPS14/RPS19/RPL10/UBA52/RPL3/RPLP0/RPL29/RPL23A/RPL18A/RPS5/DDOST/RPL13/RPS29/RPS15/RPS28
GOBP_CELLULAR_RESPIRATION	GOBP_CELLULAR_RESPIRATION	GOBP_CELLULAR_RESPIRATION	96	-0.332669	-2.01603	0.000248742	0.00652149	0.00547758	2007	tags=43%, list=24%, signal=33%	MDH2/SCO2/UQCRH/DHTKD1/NDUFAB1/FH/NFATC4/NOP53/NDUFB2/NDUFS8/MIR210/NDUFA3/PINK1/UQCC2/IDH1/BID/ME3/PARK7/MTLN/VCP/PPIF/ATP5F1A/DLST/STOML2/ATP5F1E/ANTKMT/NDUFV1/ARL2/SLC25A23/SLC25A22/UQCC3/CHCHD2/CYC1/UQCRQ/UQCRC1/NDUFA2/OPN3/ATP5F1D/OGDHL/NDUFB7/NDUFS7
GOBP_GLUCOSE_METABOLIC_PROCESS	GOBP_GLUCOSE_METABOLIC_PROCESS	GOBP_GLUCOSE_METABOLIC_PROCESS	83	-0.341801	-2.01501	0.000291585	0.00733534	0.00616116	2330	tags=51%, list=28%, signal=37%	ADPGK/FAM3A/BCKDK/SIRT7/MIR103A1/PFKP/SLC39A14/ENO2/FABP5/PGP/G6PD/H6PD/KHK/WDR5/WDTC1/PCK2/SLC25A1/MIR210/AKT2/KCNJ11/MIDN/SLC25A10/PFKM/TPI1/PPP1CA/SLC45A3/GNB3/STK11/AKT1/PASK/BAD/DDB1/PC/SLC37A4/INPPL1/TSTD1/SORD/BRAT1/LRP5/ERFE/INSR/PFKL
GOBP_INNER_MITOCHONDRIAL_MEMBRANE_ORGANIZATION	GOBP_INNER_MITOCHONDRIAL_MEMBRANE_ORGANIZATION	GOBP_INNER_MITOCHONDRIAL_MEMBRANE_ORGANIZATION	19	-0.516609	-2.01107	0.0044186	0.0531017	0.0446016	2128	tags=63%, list=25%, signal=47%	MTX2/TIMM22/AFG3L2/CHCHD6/ADCK1/PINK1/UQCC3/LETM1/TIMM29/MICOS13/ROMO1/TIMM13
LIAO_METASTASIS	LIAO_METASTASIS	LIAO_METASTASIS	270	-0.276448	-2.01056	6.6e-07	4.44e-05	3.73e-05	2172	tags=40%, list=26%, signal=31%	DUSP22/RUVBL2/SPINT1/GRAMD1A/TTLL4/CTNND2/SMG5/FAM110A/ENO2/SERINC2/ORAI2/LIMK2/FABP5/HIC2/KIFC2/DLG5/TOB2/GTSE1/CLN6/G6PD/ACTN4/NUDT14/ALPK3/PLBD2/PNKP/WDR5/RRP7A/BRD9/CBX2/WDR54/KCNH2/RACK1/BIRC5/MIR210/FHOD3/PPM1F/SMPD2/RAPGEF1/CBX6/TUBB2A/FBXO41/SNRPA/TMSB10/CHFR/DTYMK/DUSP9/FLNA/PYCR3/SHKBP1/POMK/TSSC4/UCP2/SCRIB/DGCR2/TBC1D13/LAMB1/CPSF1/DBN1/NDOR1/B3GAT3/C11orf49/NIBAN2/ITPR3/ATP13A2/FBLN1…
KIM_GASTRIC_CANCER_CHEMOSENSITIVITY	KIM_GASTRIC_CANCER_CHEMOSENSITIVITY	KIM_GASTRIC_CANCER_CHEMOSENSITIVITY	45	-0.398381	-2.01056	0.00107252	0.0200228	0.0168177	1572	tags=58%, list=19%, signal=47%	MPZL1/MEF2D/MAPKAPK3/RPL13A/ADCY3/ANGEL1/NCAM1/CFAP410/SLC26A6/MYO7A/BORCS6/POLR1E/NME4/NENF/UNG/ABCB8/IFRD2/B3GAT3/FKBP8/DOHH/PPP2R1A/KDM4B/ARMC6/SGTA/BAIAP2/ZNF219
HP_INFANTILE_MUSCULAR_HYPOTONIA	HP_INFANTILE_MUSCULAR_HYPOTONIA	HP_INFANTILE_MUSCULAR_HYPOTONIA	89	-0.33769	-2.00923	0.000257734	0.00666048	0.00559432	2757	tags=58%, list=33%, signal=40%	PACS1/MAN1B1/PIGO/TGIF1/COL5A1/ATP6V1B2/UBA1/GAA/CLTCL1/PTCH1/FGFR3/PRMT7/SLC39A14/SCO2/GRIN2A/POMT2/EXTL3/TSEN34/GLYCTK/PNKP/NDUFAF3/NUP62/MOGS/PSAP/NEUROD2/RPL10/DCHS1/DNMT3A/GLB1/CDON/TUBB3/TSEN54/GMPPB/SMARCA4/PGAP3/DLL1/SLC25A22/ADAT3/GAS1/AHCY/GTPBP3/LARGE1/DEAF1/LRP5/PIGQ/NACC1/DISP1/NTNG2/MAN2B1/ACADS/GAMT/TELO2
REACTOME_METABOLISM_OF_CARBOHYDRATES	REACTOME_METABOLISM_OF_CARBOHYDRATES	REACTOME_METABOLISM_OF_CARBOHYDRATES	129	-0.312817	-2.00625	3.51e-05	0.00139531	0.00117196	2369	tags=49%, list=28%, signal=36%	EXT2/TKT/ADPGK/TALDO1/HS3ST4/HS3ST3B1/PFKP/PGLS/TKFC/HS3ST6/NAGLU/ENO2/MDH2/PHKA2/B3GALT4/PGP/NUP93/G6PD/PRKACB/KHK/NUP85/GLYCTK/NUP62/BCAN/NUP188/PCK2/SLC25A1/PPP2R1B/SLC25A11/UBA52/GLB1/SLC35B2/NUP210/NDST1/GUSB/ST3GAL1/GALNS/SLC25A10/PFKM/TPI1/B3GAT3/PC/AGRN/SLC37A4/GALE/GPC1/HYAL2/HS6ST1/ST3GAL2/AKR1B1/SORD/AKR1A1/MAN2C1/ST3GAL4/PYGB/PPP2R1A/GALK1/B4GALT2/B4GAT1/CSPG4/PFKL/MAN2B1/GPC2
ZHANG_RESPONSE_TO_CANTHARIDIN_DN	ZHANG_RESPONSE_TO_CANTHARIDIN_DN	ZHANG_RESPONSE_TO_CANTHARIDIN_DN	39	-0.409439	-2.00596	0.00114201	0.0212469	0.0178459	2463	tags=59%, list=29%, signal=42%	EIF3B/MTHFD1/TKT/TRAP1/ATP5MC3/RUVBL2/ATP5MC2/UQCRH/FABP5/RPSA/CTPS1/NDUFB2/POLD2/RPS14/SNRPA/RPL29/ERCC2/EEF1D/MCM7/FANCG/CDK4/TIMM17B/PFKL
GOMF_4_IRON_4_SULFUR_CLUSTER_BINDING	GOMF_4_IRON_4_SULFUR_CLUSTER_BINDING	GOMF_4_IRON_4_SULFUR_CLUSTER_BINDING	19	-0.514858	-2.00425	0.00455352	0.0537683	0.0451614	1924	tags=58%, list=23%, signal=45%	CIAO3/NDUFS8/NUBP2/MOCS1/ERCC2/NDUFV1/CIAPIN1/POLE/NTHL1/POLD1/NDUFS7
GOBP_PROTEIN_METHYLATION	GOBP_PROTEIN_METHYLATION	GOBP_PROTEIN_METHYLATION	78	-0.346297	-2.00322	0.000244383	0.00642277	0.00539467	1716	tags=49%, list=21%, signal=39%	COPRS/PAX5/MLLT6/SIRT7/SETD4/PRMT7/CHTOP/EEF2KMT/WDR82/WDR5/PCMTD2/PAGR1/DNMT3A/DOT1L/ICMT/PIH1D1/FBLL1/TTLL12/MTHFR/FBL/H1-4/EHMT1/ANTKMT/KMT5C/PRMT1/PRMT8/PYGO2/DNMT1/H1-2/H1-3/NTMT1/JMJD4/MCRS1/CARM1/PHF19/SNRPB/RAB3D/H1-5
WP_DNA_REPLICATION	WP_DNA_REPLICATION	WP_DNA_REPLICATION	20	-0.504071	-2.00317	0.00278232	0.0392277	0.0329485	3322	tags=85%, list=40%, signal=51%	PCNA/CDT1/RPA1/MCM10/CDC45/RFC2/POLA2/CDK2/POLD2/UBA52/MCM3/MCM5/MCM6/POLE/MCM7/MCM2/POLD1
GOMF_NUCLEOSOME_BINDING	GOMF_NUCLEOSOME_BINDING	GOMF_NUCLEOSOME_BINDING	31	-0.440093	-2.00239	0.00125534	0.0224794	0.018881	2510	tags=61%, list=30%, signal=43%	RNF4/H2AZ1/CHD4/MLLT6/MTA2/NOC2L/HMGA2/CABIN1/RCC1/ACTB/HMGN2/H1-4/SMARCA4/H1-2/H1-3/H1-10/PWWP3A/MBD3/H1-5
WP_CHOLESTEROL_METABOLISM_WITH_BLOCH_AND_KANDUTSCHRUSSELL_PATHWAYS	WP_CHOLESTEROL_METABOLISM_WITH_BLOCH_AND_KANDUTSCHRUSSELL_PATHWAYS	WP_CHOLESTEROL_METABOLISM_WITH_BLOCH_AND_KANDUTSCHRUSSELL_PATHWAYS	27	-0.456201	-2.00135	0.00274473	0.0388495	0.0326308	889	tags=78%, list=11%, signal=70%	HMGCS1/EBP/FADS1/SCD/NSDHL/ACAT2/NR1H2/PMVK/MVD/SREBF2/ACOT2/FASN/FADS2/CYP51A1/FDPS/SREBF1/DHCR7/DHCR24/ACSL1/LSS/MVK
WP_CHOLESTEROL_BIOSYNTHESIS_PATHWAY	WP_CHOLESTEROL_BIOSYNTHESIS_PATHWAY	WP_CHOLESTEROL_BIOSYNTHESIS_PATHWAY	10	-0.643407	-2.00093	0.00200365	0.0313495	0.0263313	778	tags=50%, list=9%, signal=45%	CYP51A1/FDPS/DHCR7/LSS/MVK
RIZKI_TUMOR_INVASIVENESS_2D_DN	RIZKI_TUMOR_INVASIVENESS_2D_DN	RIZKI_TUMOR_INVASIVENESS_2D_DN	25	-0.465928	-1.99829	0.00218001	0.0331225	0.0278205	1676	tags=48%, list=20%, signal=38%	NBL1/FEN1/BCAR1/DOK1/TRPC5/CTSD/COL8A2/PPP4C/PSD/MED16/NCAPH2/MBD3
SANSOM_APC_TARGETS_UP	SANSOM_APC_TARGETS_UP	SANSOM_APC_TARGETS_UP	64	-0.363055	-1.99768	0.00044924	0.0105062	0.00882445	2439	tags=53%, list=29%, signal=38%	LRIG1/CCDC86/SNAPC2/SLC39A14/ERGIC1/EMP2/IMPA2/DYRK3/CTPS1/CHRNB4/ZNF282/MSI1/TUBB2A/EPHB2/MCM3/GNB1L/DTYMK/UNG/ACOT1/SKP2/MCM6/MRI1/MARCKSL1/PASK/MCM7/CA12/SP5/REC8/CITED1/MCM2/PRDX2/SHF/HES6/CD320
REACTOME_DNA_STRAND_ELONGATION	REACTOME_DNA_STRAND_ELONGATION	REACTOME_DNA_STRAND_ELONGATION	19	-0.512763	-1.99609	0.00475589	0.0553134	0.0464593	3322	tags=84%, list=40%, signal=51%	PCNA/RPA1/CDC45/RFC2/POLA2/GINS4/FEN1/POLD2/MCM3/MCM5/MCM6/GINS3/GINS2/MCM7/MCM2/POLD1
HP_ABNORMAL_CHORIORETINAL_MORPHOLOGY	HP_ABNORMAL_CHORIORETINAL_MORPHOLOGY	HP_ABNORMAL_CHORIORETINAL_MORPHOLOGY	63	-0.36431	-1.99405	0.000742298	0.0153977	0.012933	2065	tags=48%, list=25%, signal=36%	C12orf57/CRB1/TCTN3/PEX19/POMT2/SIX6/B9D2/PNPLA6/ACTB/CRX/TUBGCP6/POMK/PEX16/CLDN19/INPP5E/HLA-A/AKT1/CCDC22/LARGE1/COL8A2/SALL4/MICOS13/LRP5/DPP6/DISP1/B4GAT1/PEX5/NDUFB11/NRL/GUCY2D
HALLMARK_REACTIVE_OXYGEN_SPECIES_PATHWAY	HALLMARK_REACTIVE_OXYGEN_SPECIES_PATHWAY	HALLMARK_REACTIVE_OXYGEN_SPECIES_PATHWAY	25	-0.464514	-1.99223	0.00221183	0.0334063	0.0280589	2834	tags=80%, list=34%, signal=53%	CDKN2D/ATOX1/GPX3/PRDX1/PRDX6/PFKP/HMOX2/PRDX4/TXN/G6PD/PDLIM1/JUNB/ABCC1/ERCC2/MGST1/STK25/PTPA/SBNO2/GPX4/PRDX2
GOBP_RIBOSOMAL_SMALL_SUBUNIT_ASSEMBLY	GOBP_RIBOSOMAL_SMALL_SUBUNIT_ASSEMBLY	GOBP_RIBOSOMAL_SMALL_SUBUNIT_ASSEMBLY	14	-0.563299	-1.99073	0.00242896	0.035638	0.0299333	2214	tags=71%, list=27%, signal=53%	RRP7BP/ERAL1/RPSA/RRP7A/RPS14/RPS19/MRPS7/RPS5/RPS15/RPS28
REACTOME_COMPLEX_I_BIOGENESIS	REACTOME_COMPLEX_I_BIOGENESIS	REACTOME_COMPLEX_I_BIOGENESIS	23	-0.475616	-1.98971	0.00172047	0.0284416	0.0238889	2176	tags=61%, list=26%, signal=45%	COA1/NDUFC1/NDUFAB1/NDUFAF3/NDUFB2/NDUFS8/NDUFA3/NDUFV1/NDUFA2/ECSIT/NDUFA11/NDUFB11/NDUFB7/NDUFS7
WP_DNA_REPAIR_PATHWAYS_FULL_NETWORK	WP_DNA_REPAIR_PATHWAYS_FULL_NETWORK	WP_DNA_REPAIR_PATHWAYS_FULL_NETWORK	50	-0.380934	-1.9884	0.000894641	0.0175175	0.0147134	1691	tags=40%, list=20%, signal=32%	PNKP/FEN1/POLD2/POLE4/POLL/MGMT/UNG/ERCC2/MPG/POLE/FANCC/RAD23A/RBX1/DDB1/FANCG/FANCA/CENPX/NTHL1/FAAP100/POLD1
HP_TYPE_II_LISSENCEPHALY	HP_TYPE_II_LISSENCEPHALY	HP_TYPE_II_LISSENCEPHALY	10	-0.63877	-1.98651	0.00244889	0.0358332	0.0300973	2331	tags=80%, list=28%, signal=58%	POMGNT2/POMT2/TUBB3/POMK/GMPPB/LAMB1/LARGE1/B4GAT1
HP_INCREASED_CSF_LACTATE	HP_INCREASED_CSF_LACTATE	HP_INCREASED_CSF_LACTATE	36	-0.417293	-1.98578	0.00254104	0.0365426	0.0306932	2416	tags=56%, list=29%, signal=40%	HPDL/ECHS1/AIFM1/PET100/NAXE/MDH2/SCO2/HTRA2/MRPS34/NDUFAF3/NDUFS8/COX8A/HSD17B10/NDUFV1/NDUFA2/LONP1/ALDH4A1/NDUFA11/NDUFB11/NDUFS7
GOBP_SPLICEOSOMAL_TRI_SNRNP_COMPLEX_ASSEMBLY	GOBP_SPLICEOSOMAL_TRI_SNRNP_COMPLEX_ASSEMBLY	GOBP_SPLICEOSOMAL_TRI_SNRNP_COMPLEX_ASSEMBLY	13	-0.582501	-1.98476	0.00271784	0.0385698	0.0323958	1950	tags=62%, list=23%, signal=47%	CD2BP2/RNU4-2/AAR2/LSM2/RNU5B-1/RNU6ATAC/RNU5A-1/RNU4-1
ACEVEDO_LIVER_CANCER_WITH_H3K27ME3_DN	ACEVEDO_LIVER_CANCER_WITH_H3K27ME3_DN	ACEVEDO_LIVER_CANCER_WITH_H3K27ME3_DN	82	-0.337698	-1.98325	0.00039649	0.00949823	0.00797782	1114	tags=37%, list=13%, signal=32%	H3C14/RALY/CRMP1/H4C5/INSM2/H4C2/H2BC5/H2AC17/H2AC11/CPLX2/POLR3H/H2AC13/H2AC14/H4C3/H2AC15/COL27A1/H4-16/PROX1/H4C15/H2BC11/H4C1/H4C13/H2BC17/H2AC8/IGSF3/H2BC8/H2AC4/NCLN/H2AC16/H4C8
BONOME_OVARIAN_CANCER_POOR_SURVIVAL_DN	BONOME_OVARIAN_CANCER_POOR_SURVIVAL_DN	BONOME_OVARIAN_CANCER_POOR_SURVIVAL_DN	15	-0.542968	-1.98303	0.00224512	0.0337642	0.0283595	1848	tags=60%, list=22%, signal=47%	ACOT7/CLN6/PPAN/ASPSCR1/DNASE2/BOP1/GRK6/COLGALT1/HDHD3
HP_HYPOPLASIA_OF_THE_BRAINSTEM	HP_HYPOPLASIA_OF_THE_BRAINSTEM	HP_HYPOPLASIA_OF_THE_BRAINSTEM	35	-0.418924	-1.98139	0.00144716	0.0250107	0.0210072	2311	tags=63%, list=28%, signal=46%	DYNC1H1/EXOC7/SMPD4/TUBA1A/TOE1/POMT2/TSEN34/FH/TUBB2A/BRF1/TUBB3/TSEN54/POMK/GMPPB/FCSK/LAMB1/INPP5E/LARGE1/TUBB/CHMP1A/B4GAT1/MAST1
MARSON_BOUND_BY_E2F4_UNSTIMULATED	MARSON_BOUND_BY_E2F4_UNSTIMULATED	MARSON_BOUND_BY_E2F4_UNSTIMULATED	324	-0.263279	-1.97869	5.09e-07	3.53e-05	2.97e-05	2027	tags=35%, list=24%, signal=27%	FAM110A/SAE1/PLEKHO2/TCF19/SHMT1/CD2BP2/CDC25A/TOE1/PEX19/PIF1/RPN2/KCNAB2/EIF3G/SARS2/GTSE1/ENKD1/CC2D1A/FH/NUP85/DGCR8/TRIM27/TEDC2/TMEM129/MRPS12/FEN1/POLD2/C16orf86/POLE4/BIRC5/VRK1/RANGAP1/PAK4/ZNF689/RAB24/TOP3A/IFT27/IRF2BP1/MCM3/RPL3/PITPNM1/CMSS1/MARS2/FADD/MPDU1/NHP2/ITPRIP/CEP72/MCM5/RECQL4/PYCR3/UNG/COX8A/TIMM50/NUDT2/SKP2/MCM6/FLAD1/GINS3/H2BC5/TONSL/TBC1D13/HDGFL2/RDM1/SLC25A10/SF3B…
TONKS_TARGETS_OF_RUNX1_RUNX1T1_FUSION_MONOCYTE_UP	TONKS_TARGETS_OF_RUNX1_RUNX1T1_FUSION_MONOCYTE_UP	TONKS_TARGETS_OF_RUNX1_RUNX1T1_FUSION_MONOCYTE_UP	93	-0.328871	-1.97704	0.000291109	0.00733534	0.00616116	2606	tags=51%, list=31%, signal=35%	FABP3/RHOBTB1/CTDSPL/EIF3B/NR2F6/TRIP13/ATP1B3/ECHS1/TBXA2R/PFKP/SPTAN1/PPP1R14B/QPRT/AMPD2/MDH2/LY6E/RRP9/SASH1/NDUFAB1/CTPS1/ISG15/TUBB2A/SLCO4A1/KHSRP/BZW2/KANK2/TRMU/NHP2/UNG/JAM3/SMARCA4/FJX1/TFPI2/PFKM/PSMB5/IFRD2/SIVA1/MREG/SORD/CENPX/PTDSS2/TNPO2/LAPTM4B/ARG2/CKB/PXDN/NCLN
WP_BASE_EXCISION_REPAIR	WP_BASE_EXCISION_REPAIR	WP_BASE_EXCISION_REPAIR	18	-0.513641	-1.97692	0.00283099	0.0396047	0.033265	1691	tags=56%, list=20%, signal=44%	PNKP/FEN1/POLD2/POLE4/POLL/UNG/MPG/POLE/NTHL1/POLD1
PRAMOONJAGO_SOX4_TARGETS_DN	PRAMOONJAGO_SOX4_TARGETS_DN	PRAMOONJAGO_SOX4_TARGETS_DN	30	-0.43802	-1.97552	0.00217447	0.0331156	0.0278147	2848	tags=67%, list=34%, signal=44%	PEBP1/CCNB1/FAHD2A/NR2F6/METRN/LY6E/ACOT7/MRPS12/BIRC5/ADAM15/BIN1/UCP2/SKP2/PTBP1/LSM2/KCNQ2/ATP5F1D/LAPTM4B/POLD1/MAP2K2
REACTOME_DNA_DAMAGE_RECOGNITION_IN_GG_NER	REACTOME_DNA_DAMAGE_RECOGNITION_IN_GG_NER	REACTOME_DNA_DAMAGE_RECOGNITION_IN_GG_NER	15	-0.540509	-1.97405	0.0023449	0.0348294	0.0292542	1504	tags=53%, list=18%, signal=44%	ACTB/ACTR5/UBA52/RAD23A/RBX1/DDB1/GPS1/MCRS1
GOCC_MITOCHONDRIAL_ENVELOPE	GOCC_MITOCHONDRIAL_ENVELOPE	GOCC_MITOCHONDRIAL_ENVELOPE	333	-0.262438	-1.97392	5.16e-07	3.56e-05	2.99e-05	3201	tags=53%, list=38%, signal=34%	CPT1B/SLC25A33/ZDHHC8/ATP5F1B/SRC/ALDH18A1/RAB5IF/ATCAY/OXA1L/FOXRED1/SLC25A25/SLC25A28/MYO19/MAPK8IP1/TIMM10/UQCR10/MIEF1/CHCHD1/DMAC2L/TMEM14DP/CYB5R3/BPHL/PPOX/SFXN5/COX7C/SMDT1/DMPK/RNF185/ACAD9/MRPL40/PISD/HADHB/UQCRHL/NRGN/MRPL30/COX5B/PLEC/C19orf12/SNN/MTG1/TIMM8B/MRPL52/RNASET2/ABCD1/MRPS2/CASP8/MRPL55/COX4I2/GCAT/TMEM177/MRPS28/IFI27L2/TRAP1/CDS2/MRPL57/MRPS16/PGAM5/ERAL1/COA1/UQCR11/ATP…
REACTOME_ACTIVATION_OF_GENE_EXPRESSION_BY_SREBF_SREBP	REACTOME_ACTIVATION_OF_GENE_EXPRESSION_BY_SREBF_SREBP	REACTOME_ACTIVATION_OF_GENE_EXPRESSION_BY_SREBF_SREBP	22	-0.476723	-1.97255	0.00335797	0.0444501	0.0373348	1436	tags=55%, list=17%, signal=45%	SREBF2/ACACA/HELZ2/FASN/RXRA/CYP51A1/FDPS/SREBF1/DHCR7/CARM1/LSS/MVK
HONMA_DOCETAXEL_RESISTANCE	HONMA_DOCETAXEL_RESISTANCE	HONMA_DOCETAXEL_RESISTANCE	21	-0.483359	-1.96851	0.00422793	0.051846	0.0435468	2124	tags=62%, list=25%, signal=46%	PPP1R14B/RPN2/CLPTM1L/RACK1/CALR/CFL1/MYDGF/MAD2L2/ATP5F1E/GSTP1/APRT/TUBB/TUBA1B
STEIN_ESRRA_TARGETS_UP	STEIN_ESRRA_TARGETS_UP	STEIN_ESRRA_TARGETS_UP	181	-0.288623	-1.96834	1.85e-05	0.000822608	0.000690931	2868	tags=51%, list=34%, signal=34%	FAM50B/THAP4/MDH1/ACAA1/ANXA6/ALDH3A2/COX5B/ZNF768/NUDT3/FAHD2A/RBM38/RNF4/GOT2/RNASET2/NPM3/SEC14L2/EGLN1/FBXL15/DHRS11/MIPEP/STEAP3/PFKP/RTL8C/COA1/DUSP22/ATP5MC3/SPINT1/AIFM1/MTX2/AFG3L2/NAGPA/MDH2/IMPA2/CPTP/TRAK2/HMOX2/NUCB1/FH/QARS1/MRPS12/LPCAT3/MED9/CLUH/GSTM4/NDUFS8/ADCY1/IFT27/GAS2L1/VPS9D1/NECAB3/ST6GALNAC4/PPIF/TIMM50/DLST/DHDDS/ATP2A3/ELP5/NDUFV1/ISOC2/NQO2/PFKM/CIAPIN1/TWF2/WWC1/MGS…
GOBP_REGULATION_OF_PHOSPHOLIPID_METABOLIC_PROCESS	GOBP_REGULATION_OF_PHOSPHOLIPID_METABOLIC_PROCESS	GOBP_REGULATION_OF_PHOSPHOLIPID_METABOLIC_PROCESS	15	-0.538652	-1.96727	0.00254447	0.0365426	0.0306932	1701	tags=60%, list=20%, signal=48%	LDLR/SCARB1/IDH1/STOML2/ABCA2/GNB3/PHB2/ADGRF5/CAPN2
REACTOME_SIGNALING_BY_WNT_IN_CANCER	REACTOME_SIGNALING_BY_WNT_IN_CANCER	REACTOME_SIGNALING_BY_WNT_IN_CANCER	12	-0.591704	-1.96718	0.0032446	0.0433735	0.0364306	1528	tags=75%, list=18%, signal=61%	KREMEN2/PPP2R1B/PPP2R5B/AXIN1/KREMEN1/CTBP1/LRP5/PPP2R1A/FZD8
NIKOLSKY_BREAST_CANCER_1Q21_AMPLICON	NIKOLSKY_BREAST_CANCER_1Q21_AMPLICON	NIKOLSKY_BREAST_CANCER_1Q21_AMPLICON	15	-0.538586	-1.96703	0.00254447	0.0365426	0.0306932	3541	tags=93%, list=42%, signal=54%	SCAMP3/EFNA4/DPM3/THEM4/RUSC1/PMVK/FAM189B/HCN3/THBS3/ADAM15/FLAD1/PBXIP1/PYGO2/FDPS
BASAKI_YBX1_TARGETS_UP	BASAKI_YBX1_TARGETS_UP	BASAKI_YBX1_TARGETS_UP	136	-0.302123	-1.96563	9.18e-05	0.00306592	0.00257515	2994	tags=57%, list=36%, signal=37%	CENPI/HINT1/TNFRSF21/MCM10/CCM2/DDX11/PSMD2/CCNB1/RFC2/POLA2/RNF26/SLC1A5/GALNT2/H2AX/CENPO/AJUBA/KLC1/TRIP13/MTHFD1/KIF22/WDR1/DHRS11/CNOT9/SMPD4/PGAM5/PRSS23/EMP2/SMG5/SAE1/CDK2/TUBA1A/GTSE1/NUP93/CTPS1/PMEPA1/FEN1/LINC01224/BIRC5/RANGAP1/PINK1/DAZAP1/WDR4/TUBB2A/MCM3/DTYMK/FLNA/MCM5/UNG/WDR77/GSTP1/IFRD2/CCND3/SIVA1/ZNF71/ESPL1/GINS2/WWC1/POLR2L/MCM7/CAD/DDX39A/COMMD4/ACTR1A/SPC24/DPYSL3/CHAF1…
GOCC_SPLICEOSOMAL_SNRNP_COMPLEX	GOCC_SPLICEOSOMAL_SNRNP_COMPLEX	GOCC_SPLICEOSOMAL_SNRNP_COMPLEX	33	-0.419666	-1.96391	0.00302837	0.0414553	0.0348195	2018	tags=48%, list=24%, signal=37%	SF3A2/CD2BP2/RNU4-2/AAR2/SNRPA/SNRPD2/SF3B5/RNVU1-7/LSM2/RNU5B-1/SNRPB/LSM4/RNU6ATAC/LSM7/RNU5A-1/RNU4-1
HP_MENINGOCELE	HP_MENINGOCELE	HP_MENINGOCELE	29	-0.435588	-1.96299	0.00491874	0.0566416	0.0475749	1217	tags=38%, list=15%, signal=33%	FLNA/RREB1/GMPPB/INPP5E/COMT/LARGE1/FUZ/DLL3/SNRPB/LFNG/GRIP1
GOBP_CHROMOSOME_CONDENSATION	GOBP_CHROMOSOME_CONDENSATION	GOBP_CHROMOSOME_CONDENSATION	22	-0.474387	-1.96289	0.00355358	0.0460265	0.0386589	523	tags=32%, list=6%, signal=30%	H1-2/H1-3/H1-10/CHMP1A/NCAPH2/H1-5/TTN
HP_ABNORMAL_URINE_PH	HP_ABNORMAL_URINE_PH	HP_ABNORMAL_URINE_PH	37	-0.407744	-1.96258	0.00198719	0.0313495	0.0263313	2922	tags=59%, list=35%, signal=39%	PPOX/ACAD9/ACAD8/PRDX1/MRPS2/ETHE1/ACSF3/PCCB/HADH/GRHPR/DHTKD1/BTD/SLC25A1/FLAD1/MMAB/D2HGDH/HMBS/SLC52A2/MVK/ACADS/GCDH/CD320
GOCC_NADH_DEHYDROGENASE_COMPLEX	GOCC_NADH_DEHYDROGENASE_COMPLEX	GOCC_NADH_DEHYDROGENASE_COMPLEX	18	-0.509139	-1.95959	0.00323302	0.0432722	0.0363455	1743	tags=56%, list=21%, signal=44%	NDUFAB1/NDUFB2/NDUFS8/NDUFA3/NDUFV1/NDUFA2/NDUFA11/NDUFB11/NDUFB7/NDUFS7
GOBP_ENERGY_DERIVATION_BY_OXIDATION_OF_ORGANIC_COMPOUNDS	GOBP_ENERGY_DERIVATION_BY_OXIDATION_OF_ORGANIC_COMPOUNDS	GOBP_ENERGY_DERIVATION_BY_OXIDATION_OF_ORGANIC_COMPOUNDS	132	-0.303634	-1.95811	0.000169466	0.00486732	0.0040882	2007	tags=40%, list=24%, signal=31%	MDH2/SCO2/UQCRH/DHTKD1/PHKA2/NDUFAB1/KHK/FH/NFATC4/NOP53/NDUFB2/NDUFS8/MIR210/STK40/NDUFA3/PINK1/UQCC2/IDH1/BID/ME3/PARK7/MTLN/AKT2/VCP/PPIF/ATP5F1A/DLST/STOML2/ATP5F1E/ANTKMT/NDUFV1/PFKM/ARL2/SLC25A23/SLC25A22/PPP1CA/UQCC3/AKT1/PASK/CHCHD2/CYC1/UQCRQ/UQCRC1/NDUFA2/ADGRF5/PYGB/OPN3/GFPT2/ATP5F1D/OGDHL/INSR/NDUFB7/NDUFS7
GOBP_POSITIVE_REGULATION_OF_MEMBRANE_POTENTIAL	GOBP_POSITIVE_REGULATION_OF_MEMBRANE_POTENTIAL	GOBP_POSITIVE_REGULATION_OF_MEMBRANE_POTENTIAL	10	-0.629569	-1.9579	0.00309964	0.0421115	0.0353706	1302	tags=70%, list=16%, signal=59%	BID/MTLN/AKT2/VCP/STOML2/AKT1/BAD
REACTOME_GLUCONEOGENESIS	REACTOME_GLUCONEOGENESIS	REACTOME_GLUCONEOGENESIS	17	-0.515534	-1.95784	0.0044186	0.0531017	0.0446016	2966	tags=82%, list=36%, signal=53%	ALDOC/MDH1/PGK1/GAPDH/GOT2/ENO2/MDH2/PCK2/SLC25A1/SLC25A11/SLC25A10/TPI1/PC/SLC37A4
HASLINGER_B_CLL_WITH_6Q21_DELETION	HASLINGER_B_CLL_WITH_6Q21_DELETION	HASLINGER_B_CLL_WITH_6Q21_DELETION	13	-0.574568	-1.95773	0.00374477	0.047873	0.0402098	1506	tags=62%, list=18%, signal=51%	RAP1GDS1/H2BC5/H2AC11/H2AC15/H2AC6/H2BC17/H2BC8/H2AC16
REACTOME_RESOLUTION_OF_ABASIC_SITES_AP_SITES	REACTOME_RESOLUTION_OF_ABASIC_SITES_AP_SITES	REACTOME_RESOLUTION_OF_ABASIC_SITES_AP_SITES	20	-0.492367	-1.95666	0.00391785	0.0493285	0.0414323	3940	tags=95%, list=47%, signal=50%	RPA2/LIG1/PARP1/PCNA/RPA1/APEX1/SMUG1/NEIL2/RFC2/NEIL1/PNKP/FEN1/POLD2/POLE4/UNG/MPG/POLE/NTHL1/POLD1
SCHLOSSER_MYC_TARGETS_AND_SERUM_RESPONSE_UP	SCHLOSSER_MYC_TARGETS_AND_SERUM_RESPONSE_UP	SCHLOSSER_MYC_TARGETS_AND_SERUM_RESPONSE_UP	26	-0.450143	-1.95658	0.0045017	0.0535482	0.0449766	1008	tags=69%, list=12%, signal=61%	MYC/CEP68/SLC1A5/CCDC86/ATP1B3/SLC39A14/PPRC1/PTDSS1/ILF3/UCK2/PRMT1/COMT/GEMIN4/DDB1/SNRPB/LMNB2/LSM7/THOP1
FISCHER_DREAM_TARGETS	FISCHER_DREAM_TARGETS	FISCHER_DREAM_TARGETS	447	-0.246982	-1.95312	1.6e-07	1.29e-05	1.09e-05	2027	tags=32%, list=24%, signal=26%	FAM110A/GTF3C2/SAE1/PKMYT1/CDK2/TCF19/CDC25A/DHTKD1/TOE1/ACACA/PIF1/PGP/RRP9/RPL39L/TOB2/GTSE1/NUP93/CLN6/KHK/NUP85/DGCR8/RNASEH2A/TEDC2/LDLR/FEN1/TOMM40/NUP62/POLD2/RCC1/BIRC5/GTPBP2/VRK1/L3MBTL2/RANGAP1/ATAD3B/TOP3A/POLR3K/WDR4/ATAD3A/KHSRP/H4C5/POLR1E/MCM3/MIIP/CMSS1/SNRPA/TMEM18/DTYMK/CEP72/MCM5/RECQL4/PYCR3/HMGN2/UNG/PFAS/CDC42EP4/SKP2/MCM6/GINS3/ELP5/TONSL/ILF3/RDM1/GRWD1/H2AC17/TMEM109/H2A…
HP_CONGENITAL_ONSET	HP_CONGENITAL_ONSET	HP_CONGENITAL_ONSET	169	-0.288438	-1.95067	6.6e-05	0.0023061	0.00193696	2309	tags=41%, list=28%, signal=31%	KLF1/HRAS/MRPS16/DSTYK/MED25/ERGIC1/CDK5/WDR81/MBOAT7/SSR4/SCO2/TOE1/POMT2/PRKACB/HDAC4/EIF5A/RRP7A/CDK10/NDUFAF3/MOGS/PSAP/MYO7A/VRK1/TOP3A/RPL10/DCHS1/WDR4/KANK1/MARS2/MPDU1/TUBB3/PITX1/YIF1B/TUBGCP6/TSEN54/POMK/GMPPB/FCSK/ATP5F1A/JAM3/KPTN/ARL2/POLE/UQCC3/SLC6A6/AP4M1/CTSD/PC/LARGE1/VIM/CHAT/NDUFA2/TUBB/MICOS13/DNM2/SREBF1/CHMP1A/CRB2/PUF60/B4GAT1/PEX5/DVL1/CAPN15/BCL11B/KATNB1/LMNB2/NDUFB11/T…
GOBP_RIBOSOMAL_LARGE_SUBUNIT_ASSEMBLY	GOBP_RIBOSOMAL_LARGE_SUBUNIT_ASSEMBLY	GOBP_RIBOSOMAL_LARGE_SUBUNIT_ASSEMBLY	19	-0.500884	-1.94985	0.00677965	0.0708499	0.0595088	1842	tags=58%, list=22%, signal=45%	TRAF7/RPLP0P6/PPAN/NOP53/DHX30/RPL10/RPL3/RPLP0/RPL23A/BOP1/NLE1
GOCC_VACUOLAR_LUMEN	GOCC_VACUOLAR_LUMEN	GOCC_VACUOLAR_LUMEN	59	-0.359959	-1.94979	0.00102627	0.0194274	0.0163176	1755	tags=46%, list=21%, signal=36%	PLBD2/GLA/BCAN/PSAP/NAPRT/CTSB/GLB1/TOLLIP/VCP/GUSB/GALNS/PTGES2/ARSA/ATP13A2/CTSD/NSG2/ACP2/AGRN/GPC1/TUBB/PYGB/TUBB4B/CHID1/CSPG4/MAN2B1/GPC2/DPP7
HP_PITUITARY_HYPOTHYROIDISM	HP_PITUITARY_HYPOTHYROIDISM	HP_PITUITARY_HYPOTHYROIDISM	11	-0.604269	-1.94954	0.00448176	0.0534591	0.0449018	3312	tags=100%, list=40%, signal=60%	SMO/SMARCB1/BAP1/GLI3/TRAF7/LHX4/AKT1/OTX2/CDH23/TERT
MARTENS_BOUND_BY_PML_RARA_FUSION	MARTENS_BOUND_BY_PML_RARA_FUSION	MARTENS_BOUND_BY_PML_RARA_FUSION	214	-0.276928	-1.94946	1.61e-05	0.00072473	0.000608721	2647	tags=48%, list=32%, signal=33%	AZIN2/NUDT3/ELL/DNAJB12/ATP2B4/AKNA/SIRPA/MYO9B/ADAMTS10/ZC3H4/SLC7A5P1/GGA1/ACSF3/CDS2/SH3BP2/PGLS/RARA/CDK5/TSPOAP1/DRG2/WDR81/KRI1/TMCC2/CAMK2G/NCOR2/ARRB1/GRK2/FXYD6/KCNAB2/RFX2/H6PD/HDAC4/NUP85/LRRC20/NADK/OAZ1/FAM53B/TOMM40/PSAP/RPS9/SCARB1/CORO2A/ICAM4/RPS19/PREX1/TUBGCP2/RAPGEF1/PKIG/TMEM115/IDH1/DOT1L/BRF1/NUP210/HPCAL1/KSR1/NMUR1/EXOSC4/RAB11FIP3/MCM5/GUSB/TESC/HIVEP3/RASA3/ELAVL1/MPG/K…
GOBP_FATTY_ACID_BETA_OXIDATION	GOBP_FATTY_ACID_BETA_OXIDATION	GOBP_FATTY_ACID_BETA_OXIDATION	38	-0.398721	-1.9488	0.00214978	0.0328318	0.0275764	2844	tags=63%, list=34%, signal=42%	ACAT2/ACAA1/HADHB/ACOT8/SLC25A17/ABCD1/MCAT/PLIN5/ECHS1/HADH/SCP2/DECR2/IVD/ACOX3/MTLN/AKT2/HSD17B10/ECHDC2/TYSND1/AKT1/ECI1/PEX5/ACADS/GCDH
REACTOME_DUAL_INCISION_IN_TC_NER	REACTOME_DUAL_INCISION_IN_TC_NER	REACTOME_DUAL_INCISION_IN_TC_NER	28	-0.438266	-1.94726	0.00448218	0.0534591	0.0449018	1623	tags=43%, list=19%, signal=35%	POLD2/POLE4/POLR2G/UBA52/XAB2/ERCC2/POLE/POLR2L/RBX1/DDB1/POLD1/POLR2E
CASORELLI_ACUTE_PROMYELOCYTIC_LEUKEMIA_DN	CASORELLI_ACUTE_PROMYELOCYTIC_LEUKEMIA_DN	CASORELLI_ACUTE_PROMYELOCYTIC_LEUKEMIA_DN	308	-0.261093	-1.94379	2.1e-06	0.000122988	0.000103301	2205	tags=40%, list=26%, signal=30%	PFKP/PRMT7/CHTOP/MRM3/COA1/HADH/PIK3R3/AIFM1/QPRT/PRSS23/HMGA2/ENO2/CD2BP2/CDC25A/DHTKD1/ACOT2/ACACA/RRP9/VPS37C/PRDX4/GTSE1/CC2D1A/UPF1/NUP93/CLN6/TIMM44/NDN/TEDC2/LDLR/CTPS1/PPAN/EIF5A/LPCAT3/DVL2/FEN1/POLD2/BIRC5/RALY/ICAM4/SLC25A1/VRK1/PPP2R1B/RANGAP1/ACTB/RCC1L/ARFGAP2/AP2M1/IP6K1/MCM3/RPL3/CARMIL1/TTLL12/EXOSC4/MCM5/RECQL4/MYDGF/FAM171A1/VCP/RRP1/TIMM50/TECR/MEIS1/PTGES2/ILF3/NDUFV1/PFKM/TP…
GOCC_ORGANELLAR_RIBOSOME	GOCC_ORGANELLAR_RIBOSOME	GOCC_ORGANELLAR_RIBOSOME	37	-0.403835	-1.94376	0.0022828	0.0340002	0.0285577	2821	tags=59%, list=34%, signal=40%	MRPL40/MRPL30/MTG1/MRPL52/MRPS2/MRPL55/MRPS28/MRPL57/MRPS16/MRPL36/MRPS34/MPV17L2/MRPS12/MRPS7/MRPS26/MRPL4/MRPL28/MRPL14/MRPL41/MRPL23/MRPL12/MRPL54
GOBP_ATP_SYNTHESIS_COUPLED_PROTON_TRANSPORT	GOBP_ATP_SYNTHESIS_COUPLED_PROTON_TRANSPORT	GOBP_ATP_SYNTHESIS_COUPLED_PROTON_TRANSPORT	11	-0.60212	-1.94261	0.00489866	0.0565487	0.0474968	2169	tags=73%, list=26%, signal=54%	ATP5MC3/ATP5MC2/VPS9D1/ATP5F1A/STOML2/ATP5F1E/ANTKMT/ATP5F1D
HP_ABNORMAL_FULL_FIELD_ELECTRORETINOGRAM	HP_ABNORMAL_FULL_FIELD_ELECTRORETINOGRAM	HP_ABNORMAL_FULL_FIELD_ELECTRORETINOGRAM	26	-0.446892	-1.94245	0.00469326	0.0547025	0.0459461	2471	tags=58%, list=30%, signal=41%	GRK1/GNAT2/ZNF513/PDE6B/ABCA4/NUP62/MCOLN1/RP1/CACNA1F/GRM6/GNB3/LARGE1/PDE6H/AIPL1/GUCY2D
KEGG_PARKINSONS_DISEASE	KEGG_PARKINSONS_DISEASE	KEGG_PARKINSONS_DISEASE	52	-0.366354	-1.94218	0.00115962	0.0213823	0.0179596	2171	tags=50%, list=26%, signal=37%	UQCR11/ATP5MC3/NDUFC1/ATP5MC2/SEPTIN5/UQCRH/HTRA2/UBE2J2/NDUFAB1/NDUFB2/NDUFS8/NDUFA3/PINK1/PARK7/COX8A/ATP5F1A/ATP5F1E/NDUFV1/CYC1/UQCRQ/UQCRC1/NDUFA2/ATP5F1D/NDUFB7/SLC6A3/NDUFS7
CHOW_RASSF1_TARGETS_DN	CHOW_RASSF1_TARGETS_DN	CHOW_RASSF1_TARGETS_DN	18	-0.504553	-1.94194	0.00360254	0.0464385	0.039005	1919	tags=61%, list=23%, signal=47%	LY6E/P4HB/NDUFS8/PRKCSH/EXOSC4/CELSR2/PPP1CA/EEF1D/PYCR1/KLHL21/PTPRN2
MANNE_COVID19_ICU_VS_HEALTHY_DONOR_PLATELETS_UP	MANNE_COVID19_ICU_VS_HEALTHY_DONOR_PLATELETS_UP	MANNE_COVID19_ICU_VS_HEALTHY_DONOR_PLATELETS_UP	69	-0.347093	-1.94181	0.000778134	0.0160488	0.0134799	2445	tags=51%, list=29%, signal=36%	SEC14L2/METRN/TPRN/NRSN2/KLF1/CERCAM/DECR2/MBOAT7/ITPKC/CACFD1/LY6E/ACACA/KIFC2/SPATA20/HCFC1R1/POR/CLN6/NUDT14/PLBD2/ISG15/MIIP/TSPAN17/PSPN/APLP1/ARL2/PPP6R2/NPW/KREMEN1/TSPAN4/MRPL12/C20orf27/FAM174C/LRP3/C4orf48/PCYT2
MULLIGHAN_MLL_SIGNATURE_2_UP	MULLIGHAN_MLL_SIGNATURE_2_UP	MULLIGHAN_MLL_SIGNATURE_2_UP	190	-0.283551	-1.94002	2.73e-05	0.00112729	0.000946843	2035	tags=38%, list=24%, signal=30%	ABR/KRI1/NAGPA/CD2BP2/NAGA/HIC2/P4HB/FXYD6/VPS37C/GTSE1/MFSD13A/RFX2/UPF1/LRRC20/UNC119/ZNF446/OAZ1/FAM53B/RRP7A/ARHGEF40/NUP62/RANGAP1/DDX49/PAGR1/ADARB1/BID/FADD/TOLLIP/NUP210/CLCN7/AKT2/EXOSC4/FLNA/CNPY3/SYK/ASPSCR1/COX8A/PPIF/RXRA/MEIS1/ISOC2/CCND3/ECHDC2/PTPN9/ESPL1/RNPEPL1/EFHD2/GRK6/PLIN3/TNFAIP2/THAP11/COMMD4/SH3GLB2/COLGALT1/SNRNP25/UQCRC1/SMCO4/DUSP7/AKR7A2/SLC52A2/LRFN4/DNPH1/THBS4/RAS…
REACTOME_NUCLEOTIDE_EXCISION_REPAIR	REACTOME_NUCLEOTIDE_EXCISION_REPAIR	REACTOME_NUCLEOTIDE_EXCISION_REPAIR	48	-0.377261	-1.93801	0.00182331	0.029823	0.0250491	1623	tags=38%, list=19%, signal=30%	POLD2/POLE4/POLR2G/ACTB/ACTR5/UBA52/XAB2/SUMO3/ERCC2/POLE/RAD23A/POLR2L/RBX1/DDB1/GPS1/MCRS1/POLD1/POLR2E
BILANGES_SERUM_RESPONSE_TRANSLATION	BILANGES_SERUM_RESPONSE_TRANSLATION	BILANGES_SERUM_RESPONSE_TRANSLATION	16	-0.51733	-1.93698	0.00592696	0.064927	0.0545339	1974	tags=56%, list=24%, signal=43%	DNM1/RACK1/RPS19/RPL10/KHSRP/RPL29/RPL18A/RPS5/KIF21B
HP_ABNORMAL_BRAINSTEM_MRI_SIGNAL_INTENSITY	HP_ABNORMAL_BRAINSTEM_MRI_SIGNAL_INTENSITY	HP_ABNORMAL_BRAINSTEM_MRI_SIGNAL_INTENSITY	16	-0.515538	-1.93027	0.0065297	0.0688448	0.0578246	1643	tags=62%, list=20%, signal=50%	ETHE1/AIFM1/NDUFAF3/NDUFS8/NDUFV1/GTPBP3/NDUFA11/NDUFB11/NDUFS7/LAMA2
DELACROIX_RARG_BOUND_MEF	DELACROIX_RARG_BOUND_MEF	DELACROIX_RARG_BOUND_MEF	161	-0.286624	-1.92765	0.000141989	0.00425889	0.00357716	2217	tags=43%, list=27%, signal=32%	ZNF319/LOXL2/RARG/AP2A2/HOOK2/PLA2G6/PTTG1IP/PALMD/AMPD2/PRX/DNM1/MAST2/RFX1/TNRC18/G6PD/ZNF574/MPV17L2/CCDC124/MED9/ECHDC3/INF2/DBNDD1/NDUFS8/TPST2/CALR/CTSB/CERS2/JUNB/CPSF4/EPHB2/NCK2/ME3/PARK7/PITX1/ABCB8/TRMT61A/RRP1/H2BC5/MIDN/STUB1/GDPD5/DPP9/POLR3H/ARSA/PPM1L/DENND2B/STK11/PTPRS/CTSD/FSCN1/CA12/TYK2/UCK1/DPYSL3/INPPL1/H1-2/DGAT1/JRK/H1-10/CHMP1A/REX1BD/PDLIM4/CLPP/SIRT6/PKN1/ALKBH7/CKB/BS…
GOCC_LYSOSOMAL_LUMEN	GOCC_LYSOSOMAL_LUMEN	GOCC_LYSOSOMAL_LUMEN	37	-0.400484	-1.92764	0.0026441	0.0376715	0.0316413	1755	tags=51%, list=21%, signal=41%	PLBD2/GLA/BCAN/PSAP/CTSB/GLB1/GUSB/GALNS/ARSA/ATP13A2/CTSD/NSG2/ACP2/AGRN/GPC1/CHID1/CSPG4/MAN2B1/GPC2
CAFFAREL_RESPONSE_TO_THC_DN	CAFFAREL_RESPONSE_TO_THC_DN	CAFFAREL_RESPONSE_TO_THC_DN	18	-0.500674	-1.92701	0.00414123	0.0510698	0.0428949	1947	tags=61%, list=23%, signal=47%	TUBA1A/SPIDR/MCM3/PPIF/MCM6/TMEM109/CYP51A1/TUBB/DHCR7/GIPC1/UHRF1
GOMF_NUCLEOSOMAL_DNA_BINDING	GOMF_NUCLEOSOMAL_DNA_BINDING	GOMF_NUCLEOSOMAL_DNA_BINDING	19	-0.494824	-1.92626	0.00860968	0.0827083	0.069469	2504	tags=74%, list=30%, signal=52%	H2AZ1/CHD4/MTA2/HMGA2/RCC1/ACTB/HMGN2/H1-4/SMARCA4/H1-2/H1-3/H1-10/MBD3/H1-5
GOBP_RIBONUCLEOPROTEIN_COMPLEX_SUBUNIT_ORGANIZATION	GOBP_RIBONUCLEOPROTEIN_COMPLEX_SUBUNIT_ORGANIZATION	GOBP_RIBONUCLEOPROTEIN_COMPLEX_SUBUNIT_ORGANIZATION	102	-0.314385	-1.92563	0.000322377	0.00800619	0.00672462	2618	tags=50%, list=31%, signal=35%	SNRPE/RNU4ATAC/RNVU1-2A/DDX28/KLC1/SRSF9/EIF6/RRP7BP/ERAL1/PRMT7/RUVBL2/SF3A2/CD2BP2/RNU4-2/DYRK3/TRAF7/RPLP0P6/RPSA/PPAN/RRP7A/NOP53/RPS14/DHX30/AAR2/RPS19/RPL10/RPL3/RPLP0/XAB2/PIH1D1/TARBP2/MRPS7/SNRPD2/VCP/RPL23A/YJU2/GEMIN4/BOP1/RNVU1-7/LSM2/NLE1/RPS5/RNU5B-1/PUF60/SNRPB/LSM4/RPS15/RPS28/RNU6ATAC/RNU5A-1/RNU4-1
REACTOME_RESPIRATORY_ELECTRON_TRANSPORT_ATP_SYNTHESIS_BY_CHEMIOSMOTIC_COUPLING_AND_HEAT_PRODUCTION_BY_UNCOUPLING_PROTEINS	REACTOME_RESPIRATORY_ELECTRON_TRANSPORT_ATP_SYNTHESIS_BY_CHEMIOSMOTIC_COUPLING_AND_HEAT_PRODUCTION_BY_UNCOUPLING_PROTEINS	REACTOME_RESPIRATORY_ELECTRON_TRANSPORT_ATP_SYNTHESIS_BY_CHEMIOSMOTIC_COUPLING_AND_HEAT_PRODUCTION_BY_UNCOUPLING_PROTEINS	59	-0.355406	-1.92512	0.00123913	0.0223249	0.0187513	2274	tags=47%, list=27%, signal=35%	TRAP1/COA1/UQCR11/ATP5MC3/NDUFC1/ATP5MC2/SCO2/UQCRH/NDUFAB1/NDUFAF3/NDUFB2/NDUFS8/NDUFA3/COX8A/ATP5F1A/UCP2/ATP5F1E/NDUFV1/CYC1/UQCRQ/UQCRC1/NDUFA2/ECSIT/ATP5F1D/NDUFA11/NDUFB11/NDUFB7/NDUFS7
HP_DIFFUSE_WHITE_MATTER_ABNORMALITIES	HP_DIFFUSE_WHITE_MATTER_ABNORMALITIES	HP_DIFFUSE_WHITE_MATTER_ABNORMALITIES	20	-0.484345	-1.92478	0.0049224	0.0566416	0.0475749	2006	tags=65%, list=24%, signal=50%	PLEKHG2/SCO2/POMT2/PNKP/NDUFAF3/NEUROD2/GLB1/POMK/GMPPB/TIMM50/SLC25A22/HTRA1/PIGQ
GOBP_DOUBLE_STRAND_BREAK_REPAIR_VIA_BREAK_INDUCED_REPLICATION	GOBP_DOUBLE_STRAND_BREAK_REPAIR_VIA_BREAK_INDUCED_REPLICATION	GOBP_DOUBLE_STRAND_BREAK_REPAIR_VIA_BREAK_INDUCED_REPLICATION	10	-0.618656	-1.92396	0.00437127	0.0529418	0.0444673	1684	tags=90%, list=20%, signal=72%	CDC45/GINS4/MUS81/MCM3/MCM5/MCM6/GINS2/MCM7/MCM2
BLANCO_MELO_BRONCHIAL_EPITHELIAL_CELLS_INFLUENZA_A_INFECTION_DN	BLANCO_MELO_BRONCHIAL_EPITHELIAL_CELLS_INFLUENZA_A_INFECTION_DN	BLANCO_MELO_BRONCHIAL_EPITHELIAL_CELLS_INFLUENZA_A_INFECTION_DN	43	-0.38347	-1.92197	0.00302792	0.0414553	0.0348195	3324	tags=70%, list=40%, signal=42%	AIF1L/UBE2S/RAB5IF/TGFBR3L/ATG16L2/C15orf61/NUDT8/CDC45/NUDT3/PPP1R14A/CASTOR1/EMP2/UPK3B/RPL39/CCDC74A/ZNF524/TEDC2/GCHFR/RECQL4/COMTD1/TMEM160/SLC25A29/TPGS1/CAPS/ANKRD9/PDF/TJP3/E2F1/RHPN1/C4orf48
WINTER_HYPOXIA_UP	WINTER_HYPOXIA_UP	WINTER_HYPOXIA_UP	39	-0.392274	-1.92186	0.0022632	0.0338013	0.0283907	954	tags=33%, list=11%, signal=30%	TPI1/GSS/CA12/C16orf74/PLEKHG3/ANKRD9/CDCA4/MRPL14/PSMA7/NTMT1/TUBB4B/B4GALT2/PTGFRN
GOBP_SIGNAL_TRANSDUCTION_IN_ABSENCE_OF_LIGAND	GOBP_SIGNAL_TRANSDUCTION_IN_ABSENCE_OF_LIGAND	GOBP_SIGNAL_TRANSDUCTION_IN_ABSENCE_OF_LIGAND	26	-0.442141	-1.9218	0.00533179	0.0603266	0.05067	1958	tags=62%, list=23%, signal=47%	BCL2L1/HTRA2/BCL2L2/MAPK7/PPP2R1B/MKNK2/STRADB/FADD/PPP1CA/AKT1/BAD/SNAI2/PPP2R1A/BOK/PRDX2/TERT
MISSIAGLIA_REGULATED_BY_METHYLATION_DN	MISSIAGLIA_REGULATED_BY_METHYLATION_DN	MISSIAGLIA_REGULATED_BY_METHYLATION_DN	50	-0.368104	-1.92143	0.00167082	0.0279161	0.0234475	1707	tags=58%, list=20%, signal=46%	NCAPH/CDC45/ACAT2/NRGN/H2AZ1/NCAPD3/KIF22/TRIM28/SHMT1/RNASEH2A/POLD2/RCC1/FASN/SNRPA/DTYMK/MCM5/HMGN2/FBL/MTFP1/ILF3/ESPL1/MDFI/HDHD5/CAD/DNMT1/CENPM/SEMA3A/TK1/RAB26
WP_MIRNAS_INVOLVED_IN_DNA_DAMAGE_RESPONSE	WP_MIRNAS_INVOLVED_IN_DNA_DAMAGE_RESPONSE	WP_MIRNAS_INVOLVED_IN_DNA_DAMAGE_RESPONSE	12	-0.577559	-1.92015	0.00575405	0.0633854	0.0532391	1942	tags=83%, list=23%, signal=64%	MYC/H2AX/CDC25A/MIR210/MIR23B/MIR25/MIR27B/CCND3/ABL1/E2F1
HP_ABNORMALITY_OF_THE_ENDOMETRIUM	HP_ABNORMALITY_OF_THE_ENDOMETRIUM	HP_ABNORMALITY_OF_THE_ENDOMETRIUM	10	-0.61707	-1.91903	0.00437127	0.0529418	0.0444673	1196	tags=60%, list=14%, signal=51%	SLC6A17/POLE/AKT1/THOC6/NTHL1/POLD1
MOOTHA_FFA_OXYDATION	MOOTHA_FFA_OXYDATION	MOOTHA_FFA_OXYDATION	13	-0.563204	-1.91901	0.00456929	0.0538957	0.0452685	1110	tags=46%, list=13%, signal=40%	LMF2/HSD17B10/ACSL1/ECI1/NCAPH2/ACADS
GOBP_DNA_UNWINDING_INVOLVED_IN_DNA_REPLICATION	GOBP_DNA_UNWINDING_INVOLVED_IN_DNA_REPLICATION	GOBP_DNA_UNWINDING_INVOLVED_IN_DNA_REPLICATION	15	-0.525049	-1.91759	0.00384393	0.0487378	0.0409362	1343	tags=53%, list=16%, signal=45%	MCM3/MCM5/RECQL4/MCM6/GINS3/GINS2/MCM7/MCM2
HP_LACTIC_ACIDOSIS	HP_LACTIC_ACIDOSIS	HP_LACTIC_ACIDOSIS	72	-0.338883	-1.91729	0.000993848	0.0189128	0.0158854	2427	tags=49%, list=29%, signal=35%	ATPAF2/LYRM4/ETHE1/MIPEP/MRPS16/PCCB/HADH/TKFC/PET100/NAXE/SCO2/SFXN4/PHKA2/MRPS34/FH/NDUFAF3/FARS2/NDUFS8/TRMU/MRPS7/COX8A/ATP5F1E/HSD17B10/NDUFV1/UQCC3/CYC1/GTPBP3/PC/SLC37A4/MICOS13/ATP5F1D/LONP1/NDUFA11/NDUFB11/NDUFS7
GOBP_ATP_BIOSYNTHETIC_PROCESS	GOBP_ATP_BIOSYNTHETIC_PROCESS	GOBP_ATP_BIOSYNTHETIC_PROCESS	28	-0.431142	-1.91561	0.00598713	0.0652856	0.0548352	1476	tags=43%, list=18%, signal=35%	PINK1/VPS9D1/VCP/ATP5F1A/NUDT2/STOML2/ATP5F1E/ANTKMT/SPHK2/UQCC3/ATP5F1D/TMSB4X
GOBP_BASE_EXCISION_REPAIR	GOBP_BASE_EXCISION_REPAIR	GOBP_BASE_EXCISION_REPAIR	23	-0.457115	-1.91231	0.00300678	0.041369	0.034747	3940	tags=91%, list=47%, signal=48%	RPA2/LIG1/RPS3/USP47/PRMT6/PCNA/RPA1/APEX1/SMUG1/NEIL2/NEIL1/HMGA2/PNKP/FEN1/POLL/UNG/MPG/POLE/NTHL1/SIRT6/POLD1
GOCC_ANCHORED_COMPONENT_OF_PLASMA_MEMBRANE	GOCC_ANCHORED_COMPONENT_OF_PLASMA_MEMBRANE	GOCC_ANCHORED_COMPONENT_OF_PLASMA_MEMBRANE	24	-0.44962	-1.91116	0.00603272	0.0654532	0.054976	1121	tags=42%, list=13%, signal=36%	RTN4R/IGSF21/PRMT8/GAS1/RTN4RL1/GPC1/HYAL2/NTNG2/GPC2/ABHD17A
HP_ABNORMAL_PERIVENTRICULAR_WHITE_MATTER_MORPHOLOGY	HP_ABNORMAL_PERIVENTRICULAR_WHITE_MATTER_MORPHOLOGY	HP_ABNORMAL_PERIVENTRICULAR_WHITE_MATTER_MORPHOLOGY	51	-0.364025	-1.91089	0.00247263	0.0359836	0.0302236	2699	tags=57%, list=32%, signal=39%	FARSA/ISCA2/HIKESHI/UBA1/DPM2/ABCD1/SSR4/AMPD2/POMT2/CPLX1/FGFRL1/PSAP/AP5Z1/RPL10/BRF1/TSEN54/ERCC2/MTHFR/GMPPB/ARSA/ATP13A2/AP4M1/LETM1/PC/LARGE1/CTBP1/TRMT1/PUF60/LONP1
HOLLEMAN_VINCRISTINE_RESISTANCE_ALL_DN	HOLLEMAN_VINCRISTINE_RESISTANCE_ALL_DN	HOLLEMAN_VINCRISTINE_RESISTANCE_ALL_DN	14	-0.540383	-1.90975	0.0044779	0.0534591	0.0449018	1823	tags=64%, list=22%, signal=50%	RPLP2/RPS12/RPL10/TMSB10/RPL23A/INTS1/ATP13A2/VIM/LSM7
TAKAO_RESPONSE_TO_UVB_RADIATION_UP	TAKAO_RESPONSE_TO_UVB_RADIATION_UP	TAKAO_RESPONSE_TO_UVB_RADIATION_UP	40	-0.389791	-1.90866	0.00302837	0.0414553	0.0348195	2765	tags=60%, list=33%, signal=40%	PIGH/COX5B/CDC37/H2AZ1/PRDX3/GNAT2/ATP5MC3/H2AC18/TXN/ACOT7/RPS9/SELENOW/ATP6V0B/RPLP0/PTOV1/COX8A/EEF1D/POLR2L/RPS5/GPX4/CCDC85B/PRDX2/IER2/RPS28
ZHOU_TNF_SIGNALING_30MIN	ZHOU_TNF_SIGNALING_30MIN	ZHOU_TNF_SIGNALING_30MIN	27	-0.434952	-1.90813	0.0056456	0.0625697	0.052554	2473	tags=59%, list=30%, signal=42%	PRDX5/TRAP1/ATP5MC2/MRPL36/SLC39A1/DDX56/RPL10/JUNB/ERGIC3/MCM7/EEF2/PPP2R1A/TUBB4B/PRDX2/TNFAIP3/IER2
GOBP_HISTONE_METHYLATION	GOBP_HISTONE_METHYLATION	GOBP_HISTONE_METHYLATION	63	-0.348506	-1.90755	0.00200425	0.0313495	0.0263313	2455	tags=49%, list=29%, signal=35%	COPRS/PAX5/MLLT6/SIRT7/SETD4/PRMT7/CHTOP/WDR82/WDR5/PAGR1/DOT1L/PIH1D1/FBLL1/TTLL12/MTHFR/FBL/H1-4/EHMT1/KMT5C/PRMT1/PRMT8/PYGO2/DNMT1/H1-2/H1-3/NTMT1/JMJD4/MCRS1/CARM1/PHF19/H1-5
RIZKI_TUMOR_INVASIVENESS_2D_UP	RIZKI_TUMOR_INVASIVENESS_2D_UP	RIZKI_TUMOR_INVASIVENESS_2D_UP	32	-0.411902	-1.90323	0.00711719	0.0731051	0.061403	2734	tags=62%, list=33%, signal=42%	ACOT8/UBA1/DPM2/STARD3/RNF4/MLLT6/DPP3/SPTAN1/TAOK2/NAB2/NQO2/SPHK2/DUSP2/CAD/TMEFF1/CYP27B1/LSS/GNA11/LRP3/LSM7
BURTON_ADIPOGENESIS_PEAK_AT_24HR	BURTON_ADIPOGENESIS_PEAK_AT_24HR	BURTON_ADIPOGENESIS_PEAK_AT_24HR	20	-0.478607	-1.90198	0.00559211	0.0622956	0.0523238	1592	tags=50%, list=19%, signal=41%	ISYNA1/RANGAP1/TRAPPC5/ELAVL1/CAD/EXOSC5/GALK1/PRL/DCTPP1/TK1
REACTOME_TRANSCRIPTION_COUPLED_NUCLEOTIDE_EXCISION_REPAIR_TC_NER	REACTOME_TRANSCRIPTION_COUPLED_NUCLEOTIDE_EXCISION_REPAIR_TC_NER	REACTOME_TRANSCRIPTION_COUPLED_NUCLEOTIDE_EXCISION_REPAIR_TC_NER	32	-0.411531	-1.90152	0.00711719	0.0731051	0.061403	1623	tags=41%, list=19%, signal=33%	POLD2/POLE4/POLR2G/UBA52/XAB2/ERCC2/POLE/POLR2L/RBX1/DDB1/GPS1/POLD1/POLR2E
HOSHIDA_LIVER_CANCER_LATE_RECURRENCE_DN	HOSHIDA_LIVER_CANCER_LATE_RECURRENCE_DN	HOSHIDA_LIVER_CANCER_LATE_RECURRENCE_DN	31	-0.417222	-1.89833	0.00291374	0.0403969	0.0339305	1396	tags=42%, list=17%, signal=35%	CUX2/USF2/U2AF2/GCHFR/PITX1/PRKAR1B/URB2/ACP2/MAOA/ATP5F1D/PRL/PEMT/PCYT2
GOMF_ACTIN_MONOMER_BINDING	GOMF_ACTIN_MONOMER_BINDING	GOMF_ACTIN_MONOMER_BINDING	13	-0.556131	-1.89491	0.0060122	0.0654039	0.0549345	1332	tags=54%, list=16%, signal=45%	TMSB15A/TMSB10/CORO1A/TWF2/ABL1/ABL2/TMSB4X
HP_APLASIA_HYPOPLASIA_AFFECTING_THE_EYE	HP_APLASIA_HYPOPLASIA_AFFECTING_THE_EYE	HP_APLASIA_HYPOPLASIA_AFFECTING_THE_EYE	175	-0.279443	-1.89489	0.000123293	0.00380347	0.00319464	2584	tags=47%, list=31%, signal=33%	FIG4/LIMK1/ARVCF/ADAMTS10/TSPAN12/NAA10/FANCE/ZIC1/TRIP13/PTCH1/GLI3/STRA6/POMGNT2/TRIM28/HRAS/GNAT2/MED25/CLIP2/GTF2IRD1/TKFC/C12orf57/CRB1/MDH2/TCTN3/CTDP1/VAC14/POMT2/LHX4/CPLX1/FH/SIX6/ABCA4/TMEM98/GPR161/B9D2/FGFRL1/NUP188/ACTB/SLC25A11/ATOH7/AP2M1/DNMT3A/ATAD3A/CDON/TUBB3/RECQL4/TUBGCP6/ERCC2/RREB1/POMK/GMPPB/MAD2L2/CACNA1F/DLST/TONSL/HPS6/INTS1/ACTG1/COMT/FANCC/LETM1/OTX2/LARGE1/CTBP1/FAM1…
GOBP_MONOSACCHARIDE_METABOLIC_PROCESS	GOBP_MONOSACCHARIDE_METABOLIC_PROCESS	GOBP_MONOSACCHARIDE_METABOLIC_PROCESS	112	-0.302411	-1.89477	0.00039235	0.00941987	0.00791201	2753	tags=53%, list=33%, signal=36%	PGK1/FUT5/INPP5K/GAPDH/B3GLCT/SLC23A2/GAA/PMM1/ADPGK/FAM3A/BCKDK/SIRT7/MIR103A1/PFKP/POFUT1/SLC39A14/ENO2/FABP5/PGP/G6PD/H6PD/KHK/GLYCTK/WDR5/WDTC1/PCK2/SLC25A1/MIR210/GLB1/AKT2/KCNJ11/MIDN/SLC25A10/PFKM/TPI1/PPP1CA/SLC45A3/GNB3/STK11/AKT1/PASK/BAD/DDB1/PC/SLC37A4/GALE/INPPL1/TSTD1/AKR1B1/SORD/AKR1A1/MAN2C1/BRAT1/LRP5/ERFE/GALK1/INSR/PFKL/MAN2B1
GOBP_REGULATION_OF_MITOCHONDRIAL_MEMBRANE_POTENTIAL	GOBP_REGULATION_OF_MITOCHONDRIAL_MEMBRANE_POTENTIAL	GOBP_REGULATION_OF_MITOCHONDRIAL_MEMBRANE_POTENTIAL	34	-0.4047	-1.89331	0.00485761	0.0561347	0.0471491	1573	tags=59%, list=19%, signal=48%	ABCD1/PRDX3/RTL10/BCL2L1/RACK1/OPRD1/PINK1/BID/PARK7/MTLN/AKT2/MUL1/VCP/UCP2/STOML2/ABL1/AKT1/BAD/PYCR1/BOK
BLANCO_MELO_COVID19_SARS_COV_2_INFECTION_A594_CELLS_DN	BLANCO_MELO_COVID19_SARS_COV_2_INFECTION_A594_CELLS_DN	BLANCO_MELO_COVID19_SARS_COV_2_INFECTION_A594_CELLS_DN	39	-0.386405	-1.89311	0.00300154	0.041369	0.034747	2723	tags=64%, list=33%, signal=43%	NRGN/SDF2L1/H2AX/HPDL/PIK3R3/SYNGR4/SLC26A9/UPK3B/FGFR4/FEN1/SPDEF/RADIL/FASN/MCM5/RECQL4/TONSL/SLC25A10/LRRC45/CCND3/ADAT3/FAM222A/PDF/PACSIN1/DHCR24/TK1
REACTOME_SYNTHESIS_OF_DNA	REACTOME_SYNTHESIS_OF_DNA	REACTOME_SYNTHESIS_OF_DNA	52	-0.357013	-1.89266	0.00173631	0.028616	0.0240354	1645	tags=40%, list=20%, signal=33%	FEN1/POLD2/POLE4/PSMB1/UBA52/MCM3/ANAPC2/MCM5/SKP2/MCM6/GINS3/PSMB5/POLE/GINS2/RBX1/MCM7/PSMA7/MCM2/FZR1/POLD1/ANAPC11
GOBP_PHOSPHATIDYLCHOLINE_BIOSYNTHETIC_PROCESS	GOBP_PHOSPHATIDYLCHOLINE_BIOSYNTHETIC_PROCESS	GOBP_PHOSPHATIDYLCHOLINE_BIOSYNTHETIC_PROCESS	14	-0.535531	-1.8926	0.00528593	0.0599959	0.0503922	1920	tags=57%, list=23%, signal=44%	SLC44A1/FABP5/LPCAT3/CHAT/SLC44A3/CAPN2/PEMT/SLC44A2
GOBP_PYRIMIDINE_NUCLEOTIDE_METABOLIC_PROCESS	GOBP_PYRIMIDINE_NUCLEOTIDE_METABOLIC_PROCESS	GOBP_PYRIMIDINE_NUCLEOTIDE_METABOLIC_PROCESS	26	-0.435374	-1.89239	0.00648114	0.0683994	0.0574506	2747	tags=69%, list=33%, signal=47%	SMUG1/NT5C/NEIL2/NEIL1/SHMT1/CTPS1/DCTD/UCKL1/NME4/DTYMK/UNG/NT5M/UCK2/CAD/UCK1/NTHL1/NME3/DCTPP1
SCHLOSSER_SERUM_RESPONSE_AUGMENTED_BY_MYC	SCHLOSSER_SERUM_RESPONSE_AUGMENTED_BY_MYC	SCHLOSSER_SERUM_RESPONSE_AUGMENTED_BY_MYC	61	-0.348101	-1.89169	0.00198749	0.0313495	0.0263313	2200	tags=49%, list=26%, signal=36%	RNH1/UQCR11/SYNGR2/MAU2/NCOR2/P4HB/KCNAB2/HGS/CABIN1/NUP62/MED24/KCNH2/UBE2M/RBM42/POMK/BCR/NDUFV1/TMEM109/CCNF/TAF6L/RAD23A/STK11/CYC1/UQCRQ/PKD1/DNPH1/PPP2R1A/CYHR1/GUK1/MAST1
REN_BOUND_BY_E2F	REN_BOUND_BY_E2F	REN_BOUND_BY_E2F	27	-0.431184	-1.8916	0.00635533	0.0675085	0.0567023	2704	tags=63%, list=32%, signal=43%	RFC2/POLA2/H2AX/H2AZ1/H2BC21/CDK2/H2AC18/CDC25A/FEN1/MCM3/MCM5/UNG/MCM6/E2F2/H2AC6/POLD1/TK1
REACTOME_UCH_PROTEINASES	REACTOME_UCH_PROTEINASES	REACTOME_UCH_PROTEINASES	42	-0.379647	-1.88995	0.00238024	0.0351134	0.0294927	1504	tags=40%, list=18%, signal=33%	ACTB/ACTR5/PSMB1/UBA52/PSMB5/H2AC17/H2AC11/H2AC13/H2AC14/H2AC21/H2AC15/H2AC6/PSMA7/H2AC8/MCRS1/H2AC4/H2AC16
GOBP_FATTY_ACID_CATABOLIC_PROCESS	GOBP_FATTY_ACID_CATABOLIC_PROCESS	GOBP_FATTY_ACID_CATABOLIC_PROCESS	49	-0.365998	-1.88907	0.00295277	0.0407814	0.0342534	3027	tags=61%, list=36%, signal=39%	IRS1/NUDT8/ACAT2/ACAA1/HADHB/ACOT8/SLC25A17/ABCD1/MCAT/PLIN5/ECHS1/PCCB/HADH/SCP2/DECR2/IVD/PCK2/ACOX3/MTLN/AKT2/SLC27A4/HSD17B10/ECHDC2/TYSND1/AKT1/ECI1/PEX5/ACADS/ILVBL/GCDH
MORI_PRE_BI_LYMPHOCYTE_UP	MORI_PRE_BI_LYMPHOCYTE_UP	MORI_PRE_BI_LYMPHOCYTE_UP	31	-0.415033	-1.88837	0.00317419	0.0427489	0.035906	1947	tags=45%, list=23%, signal=35%	TUBA1A/PRDX4/TXN/ACTN4/HMGN2/MCM6/RAMP1/MCM7/TUBB/TUBA1B/MCM2/TUBB4B/SSBP4/H2AC4
GOBP_MONOSACCHARIDE_CATABOLIC_PROCESS	GOBP_MONOSACCHARIDE_CATABOLIC_PROCESS	GOBP_MONOSACCHARIDE_CATABOLIC_PROCESS	17	-0.497127	-1.88794	0.00806735	0.079412	0.0667004	2205	tags=65%, list=26%, signal=48%	PFKP/ENO2/GLYCTK/MIR210/GLB1/PFKM/BAD/GALE/LRP5/GALK1/PFKL
GOBP_ATP_METABOLIC_PROCESS	GOBP_ATP_METABOLIC_PROCESS	GOBP_ATP_METABOLIC_PROCESS	122	-0.296217	-1.8854	0.000398057	0.00950987	0.00798761	1759	tags=43%, list=21%, signal=34%	EIF6/PFKP/ATP5MC3/NDUFC1/ATP5MC2/ENO2/UQCRH/DHTKD1/HDAC4/NDUFAB1/NADK/NDUFB2/NDUFS8/MIR210/NDUFA3/PINK1/FIS1/UQCC2/VPS9D1/BID/PARK7/VCP/PPIF/ATP5F1A/JMJD8/NUDT2/STOML2/ATP5F1E/ANTKMT/NDUFV1/SPHK2/PFKM/TPI1/ARL2/SLC25A23/UQCC3/CHCHD2/BAD/CYC1/UQCRQ/UQCRC1/NDUFA2/GALK1/ATP5F1D/OGDHL/SLC2A6/INSR/TMSB4X/SIRT6/PFKL/NDUFB7/NDUFS7
WP_METABOLIC_REPROGRAMMING_IN_COLON_CANCER	WP_METABOLIC_REPROGRAMMING_IN_COLON_CANCER	WP_METABOLIC_REPROGRAMMING_IN_COLON_CANCER	19	-0.483729	-1.88307	0.0110502	0.0966488	0.081178	3191	tags=79%, list=38%, signal=49%	GLUD1/SLC16A3/PGK1/GAPDH/SLC1A5/GOT2/TKT/TALDO1/MDH2/G6PD/FH/FASN/DLST/PYCR1/PFKL
HP_KETOSIS	HP_KETOSIS	HP_KETOSIS	25	-0.43883	-1.88207	0.0046374	0.0543439	0.0456449	1930	tags=52%, list=23%, signal=40%	PHKA2/IVD/BTD/POLR3K/KCNJ11/MMAB/ITPR3/CYC1/SLC37A4/ABCC8/ATP5F1D/INSR/GCDH
POMEROY_MEDULLOBLASTOMA_PROGNOSIS_DN	POMEROY_MEDULLOBLASTOMA_PROGNOSIS_DN	POMEROY_MEDULLOBLASTOMA_PROGNOSIS_DN	22	-0.454583	-1.88095	0.00622685	0.0669557	0.0562379	3554	tags=91%, list=43%, signal=52%	RPL35A/SLC29A1/RPS10/NCAPD2/HMGA1/MYBL2/RPS18/TKT/FGFR3/TRAP1/ATP5MC2/RPSA/RPS14/RPS19/NME4/RPL29/SNRPD2/COX8A/CAD/BYSL
HP_DECREASED_CIRCULATING_CORTISOL_LEVEL	HP_DECREASED_CIRCULATING_CORTISOL_LEVEL	HP_DECREASED_CIRCULATING_CORTISOL_LEVEL	10	-0.604197	-1.87899	0.00636756	0.0675085	0.0567023	3312	tags=100%, list=40%, signal=60%	SMO/SMARCB1/BAP1/ABCD1/GLI3/TRAF7/POR/AKT1/TERT
REACTOME_GLOBAL_GENOME_NUCLEOTIDE_EXCISION_REPAIR_GG_NER	REACTOME_GLOBAL_GENOME_NUCLEOTIDE_EXCISION_REPAIR_GG_NER	REACTOME_GLOBAL_GENOME_NUCLEOTIDE_EXCISION_REPAIR_GG_NER	35	-0.397198	-1.87863	0.0033639	0.0444741	0.037355	1623	tags=40%, list=19%, signal=32%	POLD2/POLE4/ACTB/ACTR5/UBA52/SUMO3/ERCC2/POLE/RAD23A/RBX1/DDB1/GPS1/MCRS1/POLD1
WP_FATTY_ACID_BIOSYNTHESIS	WP_FATTY_ACID_BIOSYNTHESIS	WP_FATTY_ACID_BIOSYNTHESIS	10	-0.604072	-1.8786	0.00636756	0.0675085	0.0567023	2313	tags=80%, list=28%, signal=58%	ECHS1/HADH/ACACA/ECHDC3/FASN/ECHDC2/PC/ACSL1
GOBP_SECONDARY_ALCOHOL_METABOLIC_PROCESS	GOBP_SECONDARY_ALCOHOL_METABOLIC_PROCESS	GOBP_SECONDARY_ALCOHOL_METABOLIC_PROCESS	57	-0.350225	-1.87802	0.00441791	0.0531017	0.0446016	2999	tags=61%, list=36%, signal=40%	CYB5R3/TSKU/NSDHL/PMVK/MVD/INSIG1/STARD3/SCAP/SEC14L2/ABCG4/SREBF2/MIR182/POR/CLN6/G6PD/LDLR/MBTPS1/LPCAT3/SCARB1/IDH1/RXRA/DISP3/ABCA2/GNB3/CYP51A1/FDPS/OSBPL5/LRP5/SREBF1/SNX17/DHCR7/DHCR24/CYP27B1/LSS/MVK
GOBP_CELLULAR_METABOLIC_COMPOUND_SALVAGE	GOBP_CELLULAR_METABOLIC_COMPOUND_SALVAGE	GOBP_CELLULAR_METABOLIC_COMPOUND_SALVAGE	15	-0.513939	-1.87701	0.00584941	0.064242	0.0539586	2017	tags=60%, list=24%, signal=46%	AMPD2/PDXK/NAPRT/UCKL1/FCSK/MRI1/UCK2/APRT/UCK1
REACTOME_NUCLEAR_ENVELOPE_NE_REASSEMBLY	REACTOME_NUCLEAR_ENVELOPE_NE_REASSEMBLY	REACTOME_NUCLEAR_ENVELOPE_NE_REASSEMBLY	35	-0.396703	-1.87629	0.00342921	0.0450079	0.0378034	3715	tags=83%, list=44%, signal=46%	NUP205/TUBB2B/RAN/TUBB6/TUBA4A/TUBA4B/ANKLE2/CC2D1B/BANF1/CCNB1/LEMD2/NUP133/CHMP3/SIRT2/VPS4A/TUBA1A/NUP93/NUP85/NUP62/NUP188/RCC1/VRK1/RANGAP1/TUBB2A/CHMP6/TUBB3/TUBA1B/PPP2R1A/TUBB4B
GOBP_DNA_DEPENDENT_DNA_REPLICATION	GOBP_DNA_DEPENDENT_DNA_REPLICATION	GOBP_DNA_DEPENDENT_DNA_REPLICATION	67	-0.33666	-1.87525	0.00116139	0.0213823	0.0179596	1813	tags=39%, list=22%, signal=31%	UPF1/LRWD1/PNKP/MUS81/FEN1/POLD2/POLE4/MCM3/EME2/MCM5/RECQL4/MCM6/STOML2/GINS3/TONSL/POLE/GINS2/MCM7/CHTF18/FAM111A/CENPX/ENDOG/MCM2/POLD1/CDC34/WDR18
HP_ATRIOVENTRICULAR_CANAL_DEFECT	HP_ATRIOVENTRICULAR_CANAL_DEFECT	HP_ATRIOVENTRICULAR_CANAL_DEFECT	11	-0.581058	-1.87466	0.00803021	0.0791905	0.0665143	2855	tags=82%, list=34%, signal=54%	CDC45/LZTR1/GLI3/PRKACB/EVC/CCDC22/DHCR7/PUF60/LONP1
GOBP_MITOCHONDRIAL_GENE_EXPRESSION	GOBP_MITOCHONDRIAL_GENE_EXPRESSION	GOBP_MITOCHONDRIAL_GENE_EXPRESSION	33	-0.400531	-1.87437	0.00602223	0.0654049	0.0549354	2756	tags=73%, list=33%, signal=49%	MRPL16/TWNK/SLC25A33/PUS1/CDK5RAP1/MTG1/ELAC2/MRPS2/MRPS28/MRPL57/MRPS16/MRPS34/SARS2/MPV17L2/MRPS12/RCC1L/FASTK/UQCC2/MRPS7/HSD17B10/TBRG4/MRPL23/MRPL12/POLRMT
SENGUPTA_EBNA1_ANTICORRELATED	SENGUPTA_EBNA1_ANTICORRELATED	SENGUPTA_EBNA1_ANTICORRELATED	71	-0.333366	-1.87417	0.00136429	0.0239037	0.0200774	2059	tags=44%, list=25%, signal=33%	WDR81/PRX/MARCHF2/B3GALT4/KCNAB2/AURKAIP1/H6PD/CCDC74A/WDTC1/GADD45B/NSUN5/BORCS6/RAPGEF1/CRX/PITX1/RRP1/RASA3/MCF2L/GALNS/GDPD5/ZBTB17/TP53I13/HLA-A/HLA-F/TECPR1/PWWP2B/PACSIN1/SREBF1/COTL1/SLC39A3/CCDC141
HP_PAROXYSMAL_INVOLUNTARY_EYE_MOVEMENTS	HP_PAROXYSMAL_INVOLUNTARY_EYE_MOVEMENTS	HP_PAROXYSMAL_INVOLUNTARY_EYE_MOVEMENTS	13	-0.549681	-1.87293	0.00738843	0.0747674	0.0627992	1694	tags=54%, list=20%, signal=43%	ABCA4/NDUFAF3/NDUFS8/NDUFV1/NDUFA11/NDUFB11/NDUFS7
KYNG_RESPONSE_TO_H2O2_VIA_ERCC6_DN	KYNG_RESPONSE_TO_H2O2_VIA_ERCC6_DN	KYNG_RESPONSE_TO_H2O2_VIA_ERCC6_DN	26	-0.43073	-1.8722	0.00712282	0.0731051	0.061403	2460	tags=62%, list=29%, signal=44%	FLOT2/OAZ2/ELOF1/DNAJB1/RCC1/RACK1/GAS2L1/UNG/PDZD2/BDH1/CYP51A1/DDB1/RPS5/PLXNA1/TCF3/CDC34
PID_PS1_PATHWAY	PID_PS1_PATHWAY	PID_PS1_PATHWAY	18	-0.48585	-1.86996	0.00710533	0.0731051	0.061403	3126	tags=78%, list=37%, signal=49%	FZD1/PPP2R5D/MYC/NKD1/KREMEN2/PSENEN/TAB1/DTX1/AXIN1/DLL1/CTBP1/APH1A/DVL1/TLE5
HP_ENLARGED_CISTERNA_MAGNA	HP_ENLARGED_CISTERNA_MAGNA	HP_ENLARGED_CISTERNA_MAGNA	16	-0.499164	-1.86896	0.00989342	0.0902494	0.0758029	1369	tags=44%, list=16%, signal=37%	BRF1/PITX1/PACS2/SLC5A6/MAN2B1/VPS51/KATNB1
HP_OCCIPITAL_ENCEPHALOCELE	HP_OCCIPITAL_ENCEPHALOCELE	HP_OCCIPITAL_ENCEPHALOCELE	14	-0.528829	-1.86892	0.00589195	0.0646384	0.0542916	1857	tags=57%, list=22%, signal=45%	POMT2/B9D2/POMK/GMPPB/LAMB1/INPP5E/LARGE1/B4GAT1
MANNE_COVID19_NONICU_VS_HEALTHY_DONOR_PLATELETS_UP	MANNE_COVID19_NONICU_VS_HEALTHY_DONOR_PLATELETS_UP	MANNE_COVID19_NONICU_VS_HEALTHY_DONOR_PLATELETS_UP	68	-0.334404	-1.86836	0.00221058	0.0334063	0.0280589	2445	tags=51%, list=29%, signal=37%	SEC14L2/METRN/LYRM4/TPRN/NRSN2/KLF1/ARL3/GADD45G/MVB12A/NAGLU/LY6E/DYRK3/CLN6/ISG15/TGIF2/MIIP/NECAB3/STOML2/PSPN/APLP1/RNF144A/ARL2/ZNF77/UQCC3/ADCK5/PPP6R2/NPW/HMBS/MAPK12/ASIC4/TSPAN4/MRPL12/FAM174C/LRP3/C4orf48
HP_ABNORMALITY_OF_THE_ANUS	HP_ABNORMALITY_OF_THE_ANUS	HP_ABNORMALITY_OF_THE_ANUS	95	-0.308982	-1.86797	0.00187816	0.0303987	0.0255327	2004	tags=44%, list=24%, signal=34%	PSENEN/TCTN3/SETBP1/KCNAB2/POMT2/EXTL3/POR/CD81/SPECC1L/DCHS1/PTDSS1/CDON/RECQL4/SYK/RREB1/MAD2L2/EHMT1/PGAP3/DLL1/COMT/FANCC/GAS1/ABL1/CCDC22/THOC6/DDB1/MYCN/LARGE1/FANCG/CASZ1/FANCA/SALL4/FUZ/MAMLD1/NXN/DISP1/LONP1/SNRPB/CAPN15/DOCK8/NDUFB11/GRIP1
PID_CD40_PATHWAY	PID_CD40_PATHWAY	PID_CD40_PATHWAY	10	-0.600183	-1.86651	0.00740217	0.0747674	0.0627992	1014	tags=60%, list=12%, signal=53%	TRAF2/MAPK11/AKT1/TRAF1/TRAF3/TNFAIP3
GOBP_MITOCHONDRIAL_TRANSLATION	GOBP_MITOCHONDRIAL_TRANSLATION	GOBP_MITOCHONDRIAL_TRANSLATION	21	-0.458168	-1.86592	0.00810238	0.0796121	0.0668684	2756	tags=67%, list=33%, signal=45%	CDK5RAP1/MTG1/MRPS2/MRPS28/MRPL57/MRPS16/MRPS34/SARS2/MPV17L2/MRPS12/RCC1L/UQCC2/MRPS7/MRPL23
HP_ABNORMALITY_OF_THE_OPTIC_NERVE	HP_ABNORMALITY_OF_THE_OPTIC_NERVE	HP_ABNORMALITY_OF_THE_OPTIC_NERVE	350	-0.24653	-1.86435	7.21e-06	0.000373441	0.000313663	2219	tags=37%, list=27%, signal=28%	SH3BP2/ZNF513/TBC1D7/SLC39A14/CFAP410/AIFM1/PET100/AFG3L2/PLA2G6/PDE6B/CRB1/AMPD2/SCO2/DNM1/DALRD3/NAGA/TCTN3/TOE1/MRPS34/SLC44A1/PEX19/KCNAB2/POMT2/SCYL1/TRAF7/LHX4/IFT140/CPLX1/ABHD12/FH/SIX6/LDLR/ABCA4/GLA/TMEM98/BTD/GPR161/NDUFAF3/B9D2/NUP62/MOGS/PSAP/NDUFS8/GTPBP2/PNPLA6/ACTB/TUBGCP2/POLR3K/WDR4/DNMT3A/ATAD3A/MCOLN1/RP1/GLB1/CDON/CRX/CLCN7/MPDU1/DPYSL5/TUBB3/RECQL4/TUBGCP6/ERCC2/RREB1/POMK/M…
BUYTAERT_PHOTODYNAMIC_THERAPY_STRESS_DN	BUYTAERT_PHOTODYNAMIC_THERAPY_STRESS_DN	BUYTAERT_PHOTODYNAMIC_THERAPY_STRESS_DN	304	-0.251049	-1.86418	2e-05	0.000871857	0.000732297	2598	tags=46%, list=31%, signal=33%	ISOC1/DFFB/EMC9/DPM2/H2AX/EML3/ANKFY1/TIMM8B/CTDSPL/RNASET2/GINS4/MCAT/PHTF1/RPS6KB2/ZHX3/TMEM177/DHRS11/TMEM80/MRPL57/RTL10/LOXL2/STX10/PRMT7/INTS9/TOR3A/AP2A2/COA1/HADH/CDK5/TTLL4/PXMP2/PRSS23/GTF3C2/MDH2/NCOR2/SHMT1/BCL2L1/ALDH1B1/TCTN3/PIP4K2B/IVD/PGP/EEF2KMT/HMOX2/HCFC1R1/CLN6/LRP8/CTPS1/BTD/ISG15/TGIF2/BIRC5/RRAGA/LAGE3/PPM1F/NDUFA3/PAGR1/POLR3K/SLC25A11/PTDSS1/KANK1/MCM3/UCKL1/ICMT/KANK2/G…
REACTOME_UB_SPECIFIC_PROCESSING_PROTEASES	REACTOME_UB_SPECIFIC_PROCESSING_PROTEASES	REACTOME_UB_SPECIFIC_PROCESSING_PROTEASES	88	-0.314012	-1.86389	0.00122692	0.0221458	0.0186009	1502	tags=34%, list=18%, signal=28%	DDX58/USP11/PSMB1/UBA52/RNF123/MUL1/AXIN1/SKP2/H2BC5/TRAF2/PSMB5/H2AC17/H2AC11/H2AC13/H2AC14/FKBP8/H2AC21/USP5/H2AC15/H2AC6/PSMA7/H2BC11/H2BC17/H2AC8/KEAP1/H2BC8/H2BC18/H2AC4/H2BC13/H2AC16
REACTOME_DEUBIQUITINATION	REACTOME_DEUBIQUITINATION	REACTOME_DEUBIQUITINATION	115	-0.295128	-1.86343	0.00058823	0.012659	0.0106327	1504	tags=33%, list=18%, signal=27%	ACTB/DDX58/USP11/ACTR5/PSMB1/UBA52/RNF123/MUL1/AXIN1/VCP/SKP2/JOSD2/H2BC5/TRAF2/PSMB5/H2AC17/H2AC11/RAD23A/H2AC13/H2AC14/FKBP8/H2AC21/USP5/H2AC15/H2AC6/TRAF3/PSMA7/H2BC11/H2BC17/H2AC8/MCRS1/KEAP1/TNFAIP3/H2BC8/H2BC18/H2AC4/H2BC13/H2AC16
REACTOME_RECOGNITION_OF_DNA_DAMAGE_BY_PCNA_CONTAINING_REPLICATION_COMPLEX	REACTOME_RECOGNITION_OF_DNA_DAMAGE_BY_PCNA_CONTAINING_REPLICATION_COMPLEX	REACTOME_RECOGNITION_OF_DNA_DAMAGE_BY_PCNA_CONTAINING_REPLICATION_COMPLEX	12	-0.559983	-1.86172	0.00904171	0.0853061	0.0716509	1623	tags=58%, list=19%, signal=47%	POLD2/POLE4/UBA52/POLE/RBX1/DDB1/POLD1
VERNELL_RETINOBLASTOMA_PATHWAY_UP	VERNELL_RETINOBLASTOMA_PATHWAY_UP	VERNELL_RETINOBLASTOMA_PATHWAY_UP	32	-0.402681	-1.86063	0.00985953	0.0902443	0.0757987	1983	tags=47%, list=24%, signal=36%	TCF19/CDC25A/FEN1/VRK1/KANK2/RECQL4/SKP2/MANEAL/MCM7/E2F2/FAM111A/CHAF1A/CDCA4/FANCA/ASF1B
REACTOME_PROTEIN_FOLDING	REACTOME_PROTEIN_FOLDING	REACTOME_PROTEIN_FOLDING	45	-0.368612	-1.86032	0.00491021	0.0566217	0.0475581	1504	tags=40%, list=18%, signal=33%	ACTB/FKBP9/HDAC3/USP11/GNGT1/TUBB2A/TUBB3/FBXW5/ARL2/GNB3/FBXW9/KIFC3/GNG11/TUBA1B/GNB5/TUBB4B/SPHK1/GNA11
MOREAUX_B_LYMPHOCYTE_MATURATION_BY_TACI_UP	MOREAUX_B_LYMPHOCYTE_MATURATION_BY_TACI_UP	MOREAUX_B_LYMPHOCYTE_MATURATION_BY_TACI_UP	40	-0.379842	-1.85994	0.00454084	0.0536771	0.0450849	1578	tags=45%, list=19%, signal=37%	PRX/SASH1/KCNH2/PINK1/KHSRP/NUP210/MOB3A/NPEPL1/HMCES/SPATA2L/CAPS/RAB11B/PLXNA1/MAMLD1/MAPK8IP2/RHPN1/SNTA1/GNA11
GOCC_CYTOSOLIC_LARGE_RIBOSOMAL_SUBUNIT	GOCC_CYTOSOLIC_LARGE_RIBOSOMAL_SUBUNIT	GOCC_CYTOSOLIC_LARGE_RIBOSOMAL_SUBUNIT	24	-0.437514	-1.8597	0.00862372	0.0827083	0.069469	1869	tags=75%, list=22%, signal=58%	RPL31/RPL4/RPLP1/RPL13A/RPL36/RPL18/RPL39/RPL39L/RPLP0P6/RPLP2/RPL10/UBA52/RPL3/RPLP0/RPL29/RPL23A/RPL18A/RPL13
GOCC_HETEROCHROMATIN	GOCC_HETEROCHROMATIN	GOCC_HETEROCHROMATIN	37	-0.386286	-1.85929	0.00458815	0.0540005	0.0453565	2720	tags=65%, list=33%, signal=44%	SUV39H1/UBA1/H2AZ1/NCAPD3/TRIM28/SIRT2/HMGA2/TNKS1BP1/RRP1B/LRWD1/CBX8/NOP53/CBX2/CBX6/DNMT3A/H1-4/CENPB/KMT5C/HSF1/DNMT1/SALL4/UHRF1/MBD3/H1-5
STARK_HYPPOCAMPUS_22Q11_DELETION_DN	STARK_HYPPOCAMPUS_22Q11_DELETION_DN	STARK_HYPPOCAMPUS_22Q11_DELETION_DN	17	-0.489407	-1.85862	0.00996551	0.0903857	0.0759175	3190	tags=76%, list=38%, signal=47%	ZDHHC8/TANGO2/MRPL40/TRMT2A/ARVCF/DGCR8/SLC25A1/RTN4R/DGCR2/DGCR6L/COMT/SNORA74A/CLDN5
HP_RETINAL_DYSPLASIA	HP_RETINAL_DYSPLASIA	HP_RETINAL_DYSPLASIA	11	-0.574989	-1.85507	0.00858882	0.0827083	0.069469	1168	tags=73%, list=14%, signal=63%	POMGNT2/POMT2/POMK/INPP5E/LARGE1/TUBB/B4GAT1/NDUFB11
CHARAFE_BREAST_CANCER_LUMINAL_VS_BASAL_UP	CHARAFE_BREAST_CANCER_LUMINAL_VS_BASAL_UP	CHARAFE_BREAST_CANCER_LUMINAL_VS_BASAL_UP	191	-0.269836	-1.85394	7.03e-05	0.00244876	0.00205678	2463	tags=46%, list=29%, signal=33%	EIF3B/FLOT2/LZTR1/GGA1/DENND1A/NKAIN1/TMEM80/CANT1/PRR36/ATP6AP1/CHTOP/PATZ1/ERGIC1/SYNGR2/CTNND2/EMP2/ANKRD13D/KCTD15/CACFD1/ATXN7L3B/IVD/ARRB1/ADGRB2/RHOB/VPS37C/KIFC2/TNRC18/GARNL3/ABHD12/CYB561/FGFR4/TRAPPC9/GRAMD4/DOP1B/PCK2/TGIF2/FBRSL1/NDUFS8/SPDEF/PREX1/CAMSAP3/PBX1/ARID3A/CERS2/TLE3/VIPR1/LLGL2/RAB11FIP3/EPS8L1/RDH13/PPP1R16A/WDR6/EFR3B/RAB40C/KLHL22/EVL/POLE/ZNF74/SPATA2L/ASTN2/CA12/SLC…
HP_ABNORMAL_LIGHT_AND_DARK_ADAPTED_ELECTRORETINOGRAM	HP_ABNORMAL_LIGHT_AND_DARK_ADAPTED_ELECTRORETINOGRAM	HP_ABNORMAL_LIGHT_AND_DARK_ADAPTED_ELECTRORETINOGRAM	17	-0.487146	-1.85003	0.010779	0.0948903	0.079701	2211	tags=53%, list=26%, signal=39%	ZNF513/PDE6B/NUP62/MCOLN1/RP1/CACNA1F/LARGE1/AIPL1/GUCY2D
HP_TRANSIENT_GLOBAL_AMNESIA	HP_TRANSIENT_GLOBAL_AMNESIA	HP_TRANSIENT_GLOBAL_AMNESIA	10	-0.594724	-1.84953	0.00823229	0.0801612	0.0673296	3391	tags=100%, list=41%, signal=59%	NF2/SMO/CTSH/SMARCB1/P2RY11/BAP1/TRAF7/AKT1/TERT
GOCC_CHROMATIN	GOCC_CHROMATIN	GOCC_CHROMATIN	492	-0.232014	-1.84944	1.12e-06	7.06e-05	5.93e-05	2215	tags=37%, list=27%, signal=29%	TFAP4/ZNF740/KLF1/TRIM28/IRF3/SIRT2/SIRT7/SS18L1/LOXL2/H4C11/RXRB/RARG/RUVBL2/RARA/H2AC20/SREBF2/MTA2/H4C12/SOX6/MAU2/NEUROG1/H2BC21/HMGA2/TEAD3/CIC/TNKS1BP1/RRP1B/USF1/NCOR2/HTRA2/H2AC18/HMX2/TSPY26P/ARRB1/RFX1/EBF4/ZBED4/LHX4/NFIC/RFX2/UPF1/HSF4/LRWD1/CBX8/NFATC4/SIX6/WDR82/UXT/ZNF446/NOP53/BRD9/H3C14/MEIS3/CBX2/RCC1/TGIF2/NPAS1/SPDEF/ACTB/NEUROD2/ZBTB22/PINK1/SIX5/TBX20/PBX1/ACTR5/CBX6/TP73/AT…
HP_KETOACIDOSIS	HP_KETOACIDOSIS	HP_KETOACIDOSIS	13	-0.542666	-1.84903	0.00876941	0.0833946	0.0700455	2285	tags=69%, list=27%, signal=50%	ACSF3/IVD/BTD/KCNJ11/ITPR3/CYC1/ABCC8/ATP5F1D/INSR
WALLACE_JAK2_TARGETS_UP	WALLACE_JAK2_TARGETS_UP	WALLACE_JAK2_TARGETS_UP	12	-0.555987	-1.84843	0.0097426	0.0894766	0.0751539	1142	tags=50%, list=14%, signal=43%	BIN1/TMEM109/POLE/MGST3/H1-10/MRPL12
REACTOME_DISEASES_OF_CARBOHYDRATE_METABOLISM	REACTOME_DISEASES_OF_CARBOHYDRATE_METABOLISM	REACTOME_DISEASES_OF_CARBOHYDRATE_METABOLISM	15	-0.505833	-1.84741	0.00678531	0.0708499	0.0595088	3320	tags=87%, list=40%, signal=52%	PPP1R3C/GYS1/NHLRC1/SGSH/GAA/TALDO1/NAGLU/KHK/UBA52/GLB1/GUSB/GALNS/SLC37A4
HP_ABNORMAL_CSF_METABOLITE_LEVEL	HP_ABNORMAL_CSF_METABOLITE_LEVEL	HP_ABNORMAL_CSF_METABOLITE_LEVEL	47	-0.362348	-1.8464	0.00380768	0.0485054	0.040741	2131	tags=51%, list=26%, signal=38%	HPDL/ECHS1/AIFM1/TSPOAP1/PET100/NAXE/MDH2/SCO2/HTRA2/MRPS34/RNASEH2A/NDUFAF3/NDUFS8/COX8A/TICAM1/HSD17B10/NDUFV1/NDUFA2/TRAF3/LONP1/ALDH4A1/NDUFA11/NDUFB11/NDUFS7
REACTOME_REGULATION_OF_EXPRESSION_OF_SLITS_AND_ROBOS	REACTOME_REGULATION_OF_EXPRESSION_OF_SLITS_AND_ROBOS	REACTOME_REGULATION_OF_EXPRESSION_OF_SLITS_AND_ROBOS	68	-0.330352	-1.84573	0.002798	0.0393463	0.0330481	2073	tags=44%, list=25%, signal=33%	PSMB3/EIF4A3/RPL39/RPL39L/LHX4/RPLP2/RPS12/RPSA/RPS9/MSI1/RPS21/RPS14/RPS19/RPL10/PSMB1/UBA52/RPL3/RPLP0/RPL29/ELOB/RPL23A/PSMB5/RBX1/RPL18A/RPS5/PSMA7/RPL13/RPS29/RPS15/RPS28
HP_ANTERIORLY_PLACED_ANUS	HP_ANTERIORLY_PLACED_ANUS	HP_ANTERIORLY_PLACED_ANUS	26	-0.424547	-1.84532	0.0081495	0.0797135	0.0669536	2675	tags=73%, list=32%, signal=50%	PIGO/TGIF1/B3GLCT/CHD4/PTCH1/GLI3/SETBP1/POR/DCHS1/PTDSS1/CDON/RECQL4/PGAP3/DLL1/GAS1/DDB1/DISP1/SNRPB/NDUFB11
GOBP_NUCLEOSIDE_METABOLIC_PROCESS	GOBP_NUCLEOSIDE_METABOLIC_PROCESS	GOBP_NUCLEOSIDE_METABOLIC_PROCESS	21	-0.453073	-1.84517	0.0104738	0.0932647	0.0783356	1336	tags=43%, list=16%, signal=36%	UCKL1/ICMT/NME4/DTYMK/APRT/DNPH1/NUDT1/MACROD1/TK1
GOMF_OXIDOREDUCTASE_ACTIVITY_ACTING_ON_THE_CH_CH_GROUP_OF_DONORS	GOMF_OXIDOREDUCTASE_ACTIVITY_ACTING_ON_THE_CH_CH_GROUP_OF_DONORS	GOMF_OXIDOREDUCTASE_ACTIVITY_ACTING_ON_THE_CH_CH_GROUP_OF_DONORS	20	-0.464204	-1.84474	0.0081436	0.0797135	0.0669536	2922	tags=80%, list=35%, signal=52%	PPOX/ACAD9/ACAA1/ACAD8/DECR2/IVD/ACOX3/FASN/DUS1L/TECR/PTGES2/DUS3L/DHCR7/DHCR24/ACADS/GCDH
GOBP_GENERATION_OF_PRECURSOR_METABOLITES_AND_ENERGY	GOBP_GENERATION_OF_PRECURSOR_METABOLITES_AND_ENERGY	GOBP_GENERATION_OF_PRECURSOR_METABOLITES_AND_ENERGY	209	-0.262609	-1.84038	5.74e-05	0.00206324	0.00173297	2344	tags=42%, list=28%, signal=31%	TKT/ADPGK/TALDO1/TRAP1/EIF6/PDIA5/LOXL2/PFKP/PGLS/UQCR11/NDUFC1/ENO2/MDH2/SCO2/UQCRH/DHTKD1/PHKA2/POR/G6PD/H6PD/HDAC4/NDUFAB1/KHK/FH/CYB561/NFATC4/NOP53/NDUFB2/NDUFS8/MIR210/STK40/NDUFA3/PINK1/UQCC2/IDH1/BID/ME3/PARK7/MTLN/AKT2/COX8A/VCP/PPIF/ATP5F1A/DLST/JMJD8/STOML2/ATP5F1E/ANTKMT/NDUFV1/NQO2/SPHK2/PFKM/TPI1/CIAPIN1/ARL2/SLC25A23/SLC25A22/NDOR1/PPP1CA/UQCC3/AKT1/PASK/CHCHD2/CYC1/PHB2/SLC27A5/UQ…
HP_EXCESSIVE_DAYTIME_SOMNOLENCE	HP_EXCESSIVE_DAYTIME_SOMNOLENCE	HP_EXCESSIVE_DAYTIME_SOMNOLENCE	27	-0.419371	-1.83977	0.0106986	0.0946253	0.0794784	3515	tags=85%, list=42%, signal=49%	PRPS1/TNFSF4/NF2/TWNK/TBC1D24/SMO/DMPK/CTSH/SMARCB1/MYOD1/P2RY11/BAP1/NAA10/POMT2/TRAF7/TICAM1/AKT1/DNMT1/HMBS/LARGE1/TRAF3/DHCR7/TERT
HP_MACULAR_THICKENING	HP_MACULAR_THICKENING	HP_MACULAR_THICKENING	14	-0.52055	-1.83966	0.00724066	0.0737553	0.0619491	1131	tags=43%, list=14%, signal=37%	DHDDS/HLA-A/LRP5/ARHGEF18/NRL/REEP6
MILI_PSEUDOPODIA_CHEMOTAXIS_DN	MILI_PSEUDOPODIA_CHEMOTAXIS_DN	MILI_PSEUDOPODIA_CHEMOTAXIS_DN	206	-0.264225	-1.83933	0.00010677	0.00342538	0.00287707	3269	tags=58%, list=39%, signal=36%	PPP1R10/SLC20A1/BCL9/EMC1/SLC1A4/SCD/FOSB/POLDIP3/TMEM43/FGFR1/GLG1/CTNNA1/RNPS1/NPR2/PCNX3/ARMC9/SIRT3/MPZL1/ATP1A1/CYBC1/SF3B3/EDEM2/RRBP1/ZDHHC5/GMPR2/RGS3/LGMN/SLC35F6/ATP13A1/RUSC2/TGIF1/COL5A1/SLC23A2/PLXNA3/GAA/ADNP2/CLSTN1/P3H1/MFSD11/SERPINF1/SS18L1/CDS2/PDIA5/STEAP3/POFUT1/AP2A2/SLC39A14/RARA/SREBF2/NOC2L/WWP2/SMG5/NAGLU/PTPRF/NAGA/LY6E/RPN2/THBS3/EMILIN1/QSOX1/POR/ABHD12/KHK/LDLR/GLA/F…
REACTOME_SIGNALING_BY_RHO_GTPASES_MIRO_GTPASES_AND_RHOBTB3	REACTOME_SIGNALING_BY_RHO_GTPASES_MIRO_GTPASES_AND_RHOBTB3	REACTOME_SIGNALING_BY_RHO_GTPASES_MIRO_GTPASES_AND_RHOBTB3	333	-0.24435	-1.83788	1.03e-05	0.000495525	0.000416205	1560	tags=28%, list=19%, signal=24%	BIRC5/CFL1/PPP2R1B/RANGAP1/ARHGEF11/PAK4/LAMTOR1/LRRC41/RAP1GDS1/ACTB/PREX1/SEMA4F/RAPGEF1/ARFGAP2/TUBB2A/H4C5/PPP2R5B/NCK2/OBSCN/ARHGEF4/STARD13/TUBB3/FLNA/SHKBP1/VCP/CDC42EP4/H4C2/ESYT1/TIAM2/MAP3K11/SCRIB/MCF2L/WDR6/PKN3/H2BC5/BCR/ACTG1/DBN1/MAPK11/EVL/EFHD2/ABL1/H2AC14/PLIN3/LETM1/NISCH/ABL2/H4C3/GPS1/SRGAP3/SPC24/VIM/FARP2/H2AC6/RAC3/PLEKHG3/CENPM/H3C2/PLXNA1/ARAP1/ARHGAP39/H4-16/TUBA1B/H4C1…
GOBP_REGULATION_OF_MEMBRANE_PERMEABILITY	GOBP_REGULATION_OF_MEMBRANE_PERMEABILITY	GOBP_REGULATION_OF_MEMBRANE_PERMEABILITY	26	-0.422798	-1.83772	0.00853451	0.0823634	0.0691793	2694	tags=58%, list=32%, signal=39%	HIP1R/SLC35F6/RTL10/BCL2L1/BCL2L2/ZNF205/BID/MUL1/PPIF/JAM3/BAD/RHOT2/BOK/LAPTM4B/ALKBH7
GRADE_COLON_VS_RECTAL_CANCER_UP	GRADE_COLON_VS_RECTAL_CANCER_UP	GRADE_COLON_VS_RECTAL_CANCER_UP	14	-0.519926	-1.83745	0.00724066	0.0737553	0.0619491	2046	tags=64%, list=25%, signal=49%	PALMD/CTPS1/GADD45B/LAGE3/JUNB/ENGASE/ADGRF5/ASF1B/BCL11B
HP_DICARBOXYLIC_ACIDURIA	HP_DICARBOXYLIC_ACIDURIA	HP_DICARBOXYLIC_ACIDURIA	21	-0.450987	-1.83667	0.0107372	0.0946766	0.0795215	2833	tags=62%, list=34%, signal=41%	ACAD9/ACAD8/PRDX1/ETHE1/ACSF3/HADH/DHTKD1/SLC25A1/MMAB/D2HGDH/ACADS/GCDH/CD320
HP_CONGENITAL_DIAPHRAGMATIC_HERNIA	HP_CONGENITAL_DIAPHRAGMATIC_HERNIA	HP_CONGENITAL_DIAPHRAGMATIC_HERNIA	38	-0.375777	-1.83666	0.00575019	0.0633854	0.0532391	1789	tags=45%, list=21%, signal=35%	CPLX1/HDAC4/PBX1/FLNA/MTHFR/ADAT3/B3GAT3/ABL1/LETM1/CTBP1/MAMLD1/DLL3/DHCR7/DISP1/LFNG/NDUFB11/RPS28
NUTT_GBM_VS_AO_GLIOMA_DN	NUTT_GBM_VS_AO_GLIOMA_DN	NUTT_GBM_VS_AO_GLIOMA_DN	22	-0.443383	-1.8346	0.00923901	0.0863903	0.0725616	1143	tags=86%, list=14%, signal=75%	TMEM97/RPS6/EIF3F/AIMP2/TNK2/RPL4/RPL9P7/HIP1R/POLR2F/NCAM1/RPLP2/PPIF/RPL23A/BCR/PFKM/CIRBP/ABCC8/KCNK3/AFAP1
KEGG_LYSOSOME	KEGG_LYSOSOME	KEGG_LYSOSOME	56	-0.341539	-1.83412	0.00338663	0.044557	0.0374247	3439	tags=73%, list=41%, signal=43%	IGF2R/CLTB/ABCB9/SORT1/SUMF1/LAMP1/ATP6V0D1/ATP6V1H/CTSH/SGSH/GGA2/LGMN/AP3M2/GAA/CLTCL1/PPT2/GGA1/ATP6AP1/AP3D1/NAGLU/NAGPA/NAGA/GLA/PSAP/CTSB/ATP6V0B/MCOLN1/GLB1/AP1M2/GUSB/GALNS/AP1B1/ABCA2/ARSA/DNASE2/AP4M1/CTSD/ACP2/AP1M1/LAPTM4B/MAN2B1
REACTOME_THE_CITRIC_ACID_TCA_CYCLE_AND_RESPIRATORY_ELECTRON_TRANSPORT	REACTOME_THE_CITRIC_ACID_TCA_CYCLE_AND_RESPIRATORY_ELECTRON_TRANSPORT	REACTOME_THE_CITRIC_ACID_TCA_CYCLE_AND_RESPIRATORY_ELECTRON_TRANSPORT	79	-0.316127	-1.83353	0.00174683	0.0287021	0.0241077	2176	tags=43%, list=26%, signal=32%	COA1/UQCR11/ATP5MC3/NDUFC1/ATP5MC2/MDH2/SCO2/UQCRH/NDUFAB1/FH/NDUFAF3/NDUFB2/NDUFS8/NDUFA3/ME3/COX8A/ATP5F1A/DLST/UCP2/RXRA/ATP5F1E/NDUFV1/D2HGDH/CYC1/UQCRQ/UQCRC1/NDUFA2/ECSIT/ATP5F1D/NDUFA11/BSG/NDUFB11/NDUFB7/NDUFS7
BILANGES_SERUM_SENSITIVE_GENES	BILANGES_SERUM_SENSITIVE_GENES	BILANGES_SERUM_SENSITIVE_GENES	30	-0.406499	-1.83336	0.00696218	0.0720023	0.0604768	3450	tags=83%, list=41%, signal=49%	RRAGD/PCP2/MDN1/RPL31/TLX2/ASL/CPT1B/EIF3K/RPS18/PLPP3/RPH3AL/CDC37/CDKN1C/RCC2/NAA10/DNM1/TUBB2A/TLE3/KHSRP/AHCY/TMEM9/TUBB/PSD/CRLF1/KIF21B
HP_ENCEPHALOCELE	HP_ENCEPHALOCELE	HP_ENCEPHALOCELE	52	-0.344355	-1.82556	0.00308152	0.0419707	0.0352524	2397	tags=46%, list=29%, signal=33%	PTCH1/FGFR3/ARL3/CRB1/TCTN3/POMT2/IFT140/B9D2/CDON/CRX/FLNA/POMK/GMPPB/RD3/LAMB1/DLL1/INPP5E/GAS1/LARGE1/AIPL1/DISP1/B4GAT1/GUCY2D/GRIP1
REACTOME_MITOCHONDRIAL_TRANSLATION	REACTOME_MITOCHONDRIAL_TRANSLATION	REACTOME_MITOCHONDRIAL_TRANSLATION	42	-0.366641	-1.8252	0.00387277	0.0489315	0.041099	2496	tags=55%, list=30%, signal=39%	MRPL40/MRPL30/MRPL52/MRPS2/MRPL55/MRPS28/MRPL57/MRPS16/ERAL1/MRPL36/MRPS34/AURKAIP1/MRPS12/GADD45GIP1/MRPS7/MRPS26/MRPL4/MRPL28/MRPL14/MRPL41/MRPL23/MRPL12/MRPL54
WP_FLUOROPYRIMIDINE_ACTIVITY	WP_FLUOROPYRIMIDINE_ACTIVITY	WP_FLUOROPYRIMIDINE_ACTIVITY	13	-0.535081	-1.82319	0.0100123	0.090567	0.0760697	1186	tags=54%, list=14%, signal=46%	ERCC2/MTHFR/UCK2/UCK1/FPGS/XRCC3/TK1
REACTOME_CELL_CYCLE_CHECKPOINTS	REACTOME_CELL_CYCLE_CHECKPOINTS	REACTOME_CELL_CYCLE_CHECKPOINTS	114	-0.289155	-1.82091	0.00136281	0.0239037	0.0200774	3298	tags=59%, list=39%, signal=36%	RPA1/UBE2S/RNF8/H2BC15/RAD9A/DYNLL1/PSME2/PPP2R5D/CENPI/MCM10/PSMD2/CDC45/CCNB1/RFC2/ANAPC15/H4C14/RCC2/H2AX/NUP133/PSMB4/CENPO/BABAM1/DYNC1H1/H4C11/H4C12/H2BC21/PSMB3/PKMYT1/CDK2/CDC25A/GTSE1/NUP85/B9D2/BIRC5/PPP2R1B/RANGAP1/TOP3A/PSMB1/UBA52/H4C5/PPP2R5B/MCM3/ANAPC2/MCM5/H4C2/MCM6/H2BC5/PSMB5/MCM7/H4C3/SPC24/CENPM/PSMA7/H4-16/PIAS4/MCM2/H4C15/H2BC11/PPP2R1A/H4C1/H4C13/H2BC17/H2BC8/PCBP4/ANAPC11…
CROONQUIST_IL6_DEPRIVATION_DN	CROONQUIST_IL6_DEPRIVATION_DN	CROONQUIST_IL6_DEPRIVATION_DN	41	-0.368358	-1.82056	0.00345191	0.045251	0.0380076	1343	tags=37%, list=16%, signal=31%	MCM3/DTYMK/SKP2/CCNF/MCM7/PTP4A3/SBNO2/GPX4/GALE/CHAF1A/MCM2/H2BC11/GALK1/POLD1/TK1
GOBP_SPLICEOSOMAL_SNRNP_ASSEMBLY	GOBP_SPLICEOSOMAL_SNRNP_ASSEMBLY	GOBP_SPLICEOSOMAL_SNRNP_ASSEMBLY	25	-0.424394	-1.82016	0.0084207	0.0815787	0.0685202	812	tags=60%, list=10%, signal=54%	SNRPE/RNU4ATAC/PRMT7/CD2BP2/RNU4-2/AAR2/SNRPD2/GEMIN4/LSM2/RNU5B-1/SNRPB/LSM4/RNU6ATAC/RNU5A-1/RNU4-1
[truncated: 222 more rows]
