# Supplementary material for: Early Mechanisms of Chemoresistance in Retinoblastoma
Source: Cancers (Basel). 2022 Oct 10;14(19):4966. doi: 10.3390/cancers14194966 (PMC9563111; doi:10.3390/cancers14194966)
Supplement: Supplementary file 1 [file cancers-14-04966-s001.zip › Table S3_Samp3vSamp1_DEandGO.xlsx]

## Sheet: DE_markers
	gene	p_val	avg_log2FC	pct.1	pct.2	p_val_adj	description
1	GADD45A	0	0.97409359931654	0.825	0.294	0	growth arrest and DNA damage inducible alpha [Source:HGNC Symbol;Acc:HGNC:4095]
2	JUN	0	1.48198421586438	0.917	0.34	0	Jun proto-oncogene, AP-1 transcription factor subunit [Source:HGNC Symbol;Acc:HGNC:6204]
3	IER5	0	0.682397495686547	0.819	0.29	0	immediate early response 5 [Source:HGNC Symbol;Acc:HGNC:5393]
4	CCNL1	0	0.997405838155165	0.824	0.31	0	cyclin L1 [Source:HGNC Symbol;Acc:HGNC:20569]
5	EIF4A2	0	1.09339978004946	0.962	0.482	0	eukaryotic translation initiation factor 4A2 [Source:HGNC Symbol;Acc:HGNC:3284]
6	MSMO1	0	1.19721606632602	0.89	0.405	0	methylsterol monooxygenase 1 [Source:HGNC Symbol;Acc:HGNC:10545]
7	MED10	0	0.489972911110577	0.762	0.274	0	mediator complex subunit 10 [Source:HGNC Symbol;Acc:HGNC:28760]
8	STARD4	0	0.721591128496415	0.799	0.308	0	StAR related lipid transfer domain containing 4 [Source:HGNC Symbol;Acc:HGNC:18058]
9	CREBRF	0	1.09612579556777	0.725	0.198	0	CREB3 regulatory factor [Source:HGNC Symbol;Acc:HGNC:24050]
10	SERINC1	0	0.573496048882349	0.82	0.305	0	serine incorporator 1 [Source:HGNC Symbol;Acc:HGNC:13464]
11	H3C2	0	-2.64387119647693	0.314	0.751	0	H3 clustered histone 2 [Source:HGNC Symbol;Acc:HGNC:4776]
12	VEGFA	0	1.04068477371626	0.821	0.334	0	vascular endothelial growth factor A [Source:HGNC Symbol;Acc:HGNC:12680]
13	H4C3	0	-2.22378009152493	0.952	0.998	0	H4 clustered histone 3 [Source:HGNC Symbol;Acc:HGNC:4787]
14	DNAJB9	0	0.543826770918392	0.676	0.212	0	DnaJ heat shock protein family (Hsp40) member B9 [Source:HGNC Symbol;Acc:HGNC:6968]
15	GNGT1	0	-1.45171460275204	0.872	0.921	0	G protein subunit gamma transducin 1 [Source:HGNC Symbol;Acc:HGNC:4411]
16	VMA21	0	0.52954275734893	0.809	0.305	0	vacuolar ATPase assembly factor VMA21 [Source:HGNC Symbol;Acc:HGNC:22082]
17	GADD45G	0	0.949264050116117	0.889	0.371	0	growth arrest and DNA damage inducible gamma [Source:HGNC Symbol;Acc:HGNC:4097]
18	HSPA5	0	1.39126355997563	0.931	0.363	0	heat shock protein family A (Hsp70) member 5 [Source:HGNC Symbol;Acc:HGNC:5238]
19	UGCG	0	0.834315898872377	0.802	0.271	0	UDP-glucose ceramide glucosyltransferase [Source:HGNC Symbol;Acc:HGNC:12524]
20	TAF1D	0	1.08716951315138	0.933	0.391	0	TATA-box binding protein associated factor, RNA polymerase I subunit D [Source:HGNC Symbol;Acc:HGNC:28759]
21	CSKMT	0	0.458323377295775	0.749	0.254	0	citrate synthase lysine methyltransferase [Source:HGNC Symbol;Acc:HGNC:33113]
22	SLC3A2	0	0.924244011305518	0.802	0.296	0	solute carrier family 3 member 2 [Source:HGNC Symbol;Acc:HGNC:11026]
23	SMNDC1	0	0.555948047995832	0.782	0.287	0	survival motor neuron domain containing 1 [Source:HGNC Symbol;Acc:HGNC:16900]
24	DDIT4	0	1.27753576531312	0.903	0.42	0	DNA damage inducible transcript 4 [Source:HGNC Symbol;Acc:HGNC:24944]
25	RSRC2	0	1.07514534706911	0.945	0.432	0	arginine and serine rich coiled-coil 2 [Source:HGNC Symbol;Acc:HGNC:30559]
26	DNAJC3	0	0.753351396821425	0.801	0.294	0	DnaJ heat shock protein family (Hsp40) member C3 [Source:HGNC Symbol;Acc:HGNC:9439]
27	POLR1D	0	0.657144464134712	0.877	0.371	0	RNA polymerase I and III subunit D [Source:HGNC Symbol;Acc:HGNC:20422]
28	HERPUD1	0	0.638177419476028	0.675	0.201	0	homocysteine inducible ER protein with ubiquitin like domain 1 [Source:HGNC Symbol;Acc:HGNC:13744]
29	ALDOC	0	0.827441096579431	0.786	0.267	0	aldolase, fructose-bisphosphate C [Source:HGNC Symbol;Acc:HGNC:418]
30	KRT10	0	0.62896509703819	0.831	0.324	0	keratin 10 [Source:HGNC Symbol;Acc:HGNC:6413]
31	FTL	0	1.28152286930356	0.962	0.715	0	ferritin light chain [Source:HGNC Symbol;Acc:HGNC:3999]
32	IER2	0	0.812878248044623	0.869	0.335	0	immediate early response 2 [Source:HGNC Symbol;Acc:HGNC:28871]
33	HSPB1	1.38017711167615e-307	0.810297878342521	0.879	0.373	2.17488309257927e-303	heat shock protein family B (small) member 1 [Source:HGNC Symbol;Acc:HGNC:5246]
34	COPS2	4.19171864227652e-306	0.554719172235011	0.821	0.321	6.60531023649934e-302	COP9 signalosome subunit 2 [Source:HGNC Symbol;Acc:HGNC:30747]
35	ARF1	9.1017615464966e-306	0.752675666428144	0.927	0.428	1.43425558449693e-301	ADP ribosylation factor 1 [Source:HGNC Symbol;Acc:HGNC:652]
36	NFIL3	1.46660474268774e-305	0.651652605119463	0.688	0.225	2.31107575352734e-301	nuclear factor, interleukin 3 regulated [Source:HGNC Symbol;Acc:HGNC:7787]
37	UHMK1	3.4637467310515e-304	0.816362306638506	0.667	0.208	5.45817209879095e-300	U2AF homology motif kinase 1 [Source:HGNC Symbol;Acc:HGNC:19683]
38	ACBD3	1.62170749200891e-302	0.628061594236594	0.763	0.286	2.55548666590764e-298	acyl-CoA binding domain containing 3 [Source:HGNC Symbol;Acc:HGNC:15453]
39	RSL1D1	7.92263232957038e-302	0.636153173922249	0.879	0.355	1.2484484024937e-297	ribosomal L1 domain containing 1 [Source:HGNC Symbol;Acc:HGNC:24534]
40	INSIG1	4.18141396008245e-299	0.689048096462481	0.83	0.323	6.58907211829792e-295	insulin induced gene 1 [Source:HGNC Symbol;Acc:HGNC:6083]
41	SMIM13	8.89912502372183e-298	0.647497795207349	0.795	0.309	1.40232412123809e-293	small integral membrane protein 13 [Source:HGNC Symbol;Acc:HGNC:27356]
42	KMT2E	9.68528903518284e-296	0.744094909217846	0.891	0.373	1.52620784616411e-291	lysine methyltransferase 2E (inactive) [Source:HGNC Symbol;Acc:HGNC:18541]
43	SBDS	4.28240247687491e-293	0.413832959511809	0.726	0.259	6.74820982305949e-289	SBDS ribosome maturation factor [Source:HGNC Symbol;Acc:HGNC:19440]
44	HSF2	1.33954173004522e-292	0.511744867809051	0.745	0.277	2.11084985820526e-288	heat shock transcription factor 2 [Source:HGNC Symbol;Acc:HGNC:5225]
45	MKRN1	2.13536465323681e-292	0.531988000856846	0.678	0.223	3.36490762057057e-288	makorin ring finger protein 1 [Source:HGNC Symbol;Acc:HGNC:7112]
46	YPEL5	2.67012628550667e-290	0.498241912282066	0.743	0.272	4.20758500070141e-286	yippee like 5 [Source:HGNC Symbol;Acc:HGNC:18329]
47	OXR1	4.20038883964019e-290	0.522823661788139	0.84	0.34	6.61897273350501e-286	oxidation resistance 1 [Source:HGNC Symbol;Acc:HGNC:15822]
48	YY1	1.57228909877515e-288	0.726119147783675	0.932	0.406	2.47761316184988e-284	YY1 transcription factor [Source:HGNC Symbol;Acc:HGNC:12856]
49	TNXB	8.45137489267686e-288	1.06328001022813	0.586	0.126	1.33176765558802e-283	tenascin XB [Source:HGNC Symbol;Acc:HGNC:11976]
50	PPP1R15B	1.30771458042488e-287	0.807490811902421	0.696	0.242	2.06069663583352e-283	protein phosphatase 1 regulatory subunit 15B [Source:HGNC Symbol;Acc:HGNC:14951]
51	BRIX1	5.41643430117561e-287	0.543769042599198	0.805	0.32	8.53521717179252e-283	biogenesis of ribosomes BRX1 [Source:HGNC Symbol;Acc:HGNC:24170]
52	UNC119	6.20187408569741e-284	0.492817799705733	0.827	0.325	9.77291318424198e-280	unc-119 lipid binding chaperone [Source:HGNC Symbol;Acc:HGNC:12565]
53	ENSG00000271793	2.55393837986113e-283	0.387600720249473	0.706	0.248	4.02449609898517e-279	NA
54	KDM5B	2.26309819446188e-281	0.947493066452613	0.805	0.321	3.56619013483303e-277	lysine demethylase 5B [Source:HGNC Symbol;Acc:HGNC:18039]
55	SERP1	4.71014443602133e-280	0.397934739796051	0.823	0.338	7.42224560228241e-276	stress associated endoplasmic reticulum protein 1 [Source:HGNC Symbol;Acc:HGNC:10759]
56	RIOK3	3.844892051955e-279	0.513912365211577	0.815	0.323	6.05878089547069e-275	RIO kinase 3 [Source:HGNC Symbol;Acc:HGNC:11451]
57	ARF4	1.0129991463067e-277	0.634113329955237	0.75	0.288	1.59628405475009e-273	ADP ribosylation factor 4 [Source:HGNC Symbol;Acc:HGNC:655]
58	GOLT1B	3.09674015971647e-277	0.462392135955325	0.633	0.194	4.87984314368121e-273	golgi transport 1B [Source:HGNC Symbol;Acc:HGNC:20175]
59	PIM3	5.79935963629808e-277	0.603700246936634	0.695	0.244	9.13863091487852e-273	Pim-3 proto-oncogene, serine/threonine kinase [Source:HGNC Symbol;Acc:HGNC:19310]
60	GOLGA4	1.0584314030004e-276	0.968793600722247	0.764	0.298	1.66787620484803e-272	golgin A4 [Source:HGNC Symbol;Acc:HGNC:4427]
61	UFM1	1.4390859460243e-276	0.499253541861013	0.769	0.299	2.2677116337451e-272	ubiquitin fold modifier 1 [Source:HGNC Symbol;Acc:HGNC:20597]
62	EIF4H	2.58566942369695e-272	0.509497122562089	0.893	0.383	4.07449787786166e-268	eukaryotic translation initiation factor 4H [Source:HGNC Symbol;Acc:HGNC:12741]
63	SRSF4	3.19645975528715e-271	0.615862114709296	0.883	0.373	5.0369812823815e-267	serine and arginine rich splicing factor 4 [Source:HGNC Symbol;Acc:HGNC:10786]
64	CCDC59	6.03560178637583e-271	0.37029823988803	0.811	0.327	9.51090129497103e-267	coiled-coil domain containing 59 [Source:HGNC Symbol;Acc:HGNC:25005]
65	NAMPT	8.25690835359144e-271	0.699459108395553	0.89	0.39	1.30112361835894e-266	nicotinamide phosphoribosyltransferase [Source:HGNC Symbol;Acc:HGNC:30092]
66	OSER1	8.58574544477762e-271	0.538505816862891	0.646	0.218	1.35294176718806e-266	oxidative stress responsive serine rich 1 [Source:HGNC Symbol;Acc:HGNC:16105]
67	ANKRD37	1.03275689037387e-270	0.697177445713446	0.735	0.288	1.62741830785114e-266	ankyrin repeat domain 37 [Source:HGNC Symbol;Acc:HGNC:29593]
68	PDCL	2.441893460391e-270	0.311976418581678	0.767	0.295	3.84793571488414e-266	phosducin like [Source:HGNC Symbol;Acc:HGNC:8770]
69	RPN1	5.81949266504141e-269	0.388710196669078	0.746	0.274	9.17035654157226e-265	ribophorin I [Source:HGNC Symbol;Acc:HGNC:10381]
70	DNAJB1	2.56810120013127e-268	1.31462884170428	0.742	0.278	4.04681387116685e-264	DnaJ heat shock protein family (Hsp40) member B1 [Source:HGNC Symbol;Acc:HGNC:5270]
71	RNMT	2.91243717954618e-268	0.64727289265166	0.902	0.396	4.58941850752887e-264	RNA guanine-7 methyltransferase [Source:HGNC Symbol;Acc:HGNC:10075]
72	STX3	7.76363933901104e-268	0.444978146933019	0.813	0.321	1.22339428704136e-263	syntaxin 3 [Source:HGNC Symbol;Acc:HGNC:11438]
73	CCNB1IP1	2.52022846437569e-266	0.586498990651571	0.859	0.379	3.97137601416322e-262	cyclin B1 interacting protein 1 [Source:HGNC Symbol;Acc:HGNC:19437]
74	VAPA	9.14011668328528e-266	0.448193764384802	0.866	0.364	1.44029958695209e-261	VAMP associated protein A [Source:HGNC Symbol;Acc:HGNC:12648]
75	IFRD1	1.29539710651002e-264	0.515846279160127	0.627	0.197	2.04128676043849e-260	interferon related developmental regulator 1 [Source:HGNC Symbol;Acc:HGNC:5456]
76	FDFT1	1.93242196487648e-264	0.698156126199777	0.869	0.382	3.04511053225236e-260	farnesyl-diphosphate farnesyltransferase 1 [Source:HGNC Symbol;Acc:HGNC:3629]
77	FDFT1	1.93242196487648e-264	0.698156126199777	0.869	0.382	3.04511053225236e-260	farnesyl-diphosphate farnesyltransferase 1 [Source:NCBI gene (formerly Entrezgene);Acc:2222]
78	HSP90AB1	2.23538555778296e-263	0.876582897479706	0.988	0.884	3.5225205619544e-259	heat shock protein 90 alpha family class B member 1 [Source:HGNC Symbol;Acc:HGNC:5258]
79	NFKBIA	8.70054945693291e-263	0.590133384702062	0.634	0.207	1.37103258342349e-258	NFKB inhibitor alpha [Source:HGNC Symbol;Acc:HGNC:7797]
80	MXD1	4.09343207646221e-262	0.599356601493439	0.622	0.195	6.45043026608915e-258	MAX dimerization protein 1 [Source:HGNC Symbol;Acc:HGNC:6761]
81	KLHL24	8.43195296314237e-262	0.629797119734386	0.751	0.281	1.32870714793197e-257	kelch like family member 24 [Source:HGNC Symbol;Acc:HGNC:25947]
82	ING1	9.33405492041106e-262	0.474467530514728	0.756	0.299	1.47086037435838e-257	inhibitor of growth family member 1 [Source:HGNC Symbol;Acc:HGNC:6062]
83	CDKN2AIP	1.40685075536911e-261	0.417856205315235	0.634	0.207	2.21691542031064e-257	CDKN2A interacting protein [Source:HGNC Symbol;Acc:HGNC:24325]
84	LRRC58	4.91231603370579e-261	0.629225806175449	0.721	0.266	7.74082760591359e-257	leucine rich repeat containing 58 [Source:HGNC Symbol;Acc:HGNC:26968]
85	PNISR	8.43947150098135e-261	0.874490264351376	0.947	0.438	1.32989191912464e-256	PNN interacting serine and arginine rich protein [Source:HGNC Symbol;Acc:HGNC:21222]
86	PJA2	1.04287076320183e-259	0.444410373663713	0.832	0.347	1.64335574865344e-255	praja ring finger ubiquitin ligase 2 [Source:HGNC Symbol;Acc:HGNC:17481]
87	DDIT3	3.74652952852073e-259	0.558899160501045	0.631	0.187	5.90378123104297e-255	DNA damage inducible transcript 3 [Source:HGNC Symbol;Acc:HGNC:2726]
88	PRPF38B	1.10807718163861e-258	0.532701330852835	0.815	0.33	1.74610802282612e-254	pre-mRNA processing factor 38B [Source:HGNC Symbol;Acc:HGNC:25512]
89	PNRC1	1.12283835653285e-258	0.444342504242859	0.828	0.344	1.76936868222447e-254	proline rich nuclear receptor coactivator 1 [Source:HGNC Symbol;Acc:HGNC:17278]
90	TMEM123	6.71903283656065e-258	0.415262673298795	0.841	0.34	1.05878519438523e-253	transmembrane protein 123 [Source:HGNC Symbol;Acc:HGNC:30138]
91	BTG3	1.78697239059978e-257	0.460435880570198	0.764	0.306	2.81591109310713e-253	BTG anti-proliferation factor 3 [Source:HGNC Symbol;Acc:HGNC:1132]
92	ING2	2.23421176086307e-257	0.420424775422284	0.721	0.276	3.52067089276802e-253	inhibitor of growth family member 2 [Source:HGNC Symbol;Acc:HGNC:6063]
93	PAPOLA	2.29393649540706e-257	0.48716562915505	0.917	0.414	3.61478512946245e-253	poly(A) polymerase alpha [Source:HGNC Symbol;Acc:HGNC:14981]
94	SLC25A36	1.031046466311e-256	0.531075127711726	0.866	0.366	1.62472302161288e-252	solute carrier family 25 member 36 [Source:HGNC Symbol;Acc:HGNC:25554]
95	SYF2	2.06778129724682e-256	0.295777389033846	0.829	0.347	3.25840976820154e-252	SYF2 pre-mRNA splicing factor [Source:HGNC Symbol;Acc:HGNC:19824]
96	PHF3	1.15636905026269e-255	0.594285930723089	0.874	0.371	1.82220634940395e-251	PHD finger protein 3 [Source:HGNC Symbol;Acc:HGNC:8921]
97	FNIP1	2.0856076211981e-255	0.520907943394469	0.695	0.256	3.28650048948396e-251	folliculin interacting protein 1 [Source:HGNC Symbol;Acc:HGNC:29418]
98	LAPTM4A	3.15499349282037e-255	0.401436478961353	0.824	0.337	4.97163874598634e-251	lysosomal protein transmembrane 4 alpha [Source:HGNC Symbol;Acc:HGNC:6924]
99	NXT1	1.81391197000895e-254	0.359663285080696	0.736	0.275	2.85836248234011e-250	nuclear transport factor 2 like export factor 1 [Source:HGNC Symbol;Acc:HGNC:15913]
100	TFG	2.19430685339643e-253	0.468255493591482	0.791	0.321	3.4577887395821e-249	trafficking from ER to golgi regulator [Source:HGNC Symbol;Acc:HGNC:11758]
101	PPIG	6.33602921746443e-253	0.639749846346789	0.92	0.417	9.98431484088045e-249	peptidylprolyl isomerase G [Source:HGNC Symbol;Acc:HGNC:14650]
102	SUGT1	6.37017806174973e-253	0.338985025656986	0.828	0.35	1.00381265897052e-248	SGT1 homolog, MIS12 kinetochore complex assembly cochaperone [Source:HGNC Symbol;Acc:HGNC:16987]
103	CRABP2	6.52806969874125e-253	0.517422655337301	0.417	0.027	1.02869322312765e-248	cellular retinoic acid binding protein 2 [Source:HGNC Symbol;Acc:HGNC:2339]
104	XBP1	1.72007895289931e-252	0.386730928862638	0.647	0.22	2.71050041397873e-248	X-box binding protein 1 [Source:HGNC Symbol;Acc:HGNC:12801]
105	MRPS30	1.78012347481388e-252	0.335284453355397	0.659	0.234	2.80511857161171e-248	mitochondrial ribosomal protein S30 [Source:HGNC Symbol;Acc:HGNC:8769]
106	C16orf87	2.92178332311913e-252	0.375802237739158	0.75	0.3	4.60414616057112e-248	chromosome 16 open reading frame 87 [Source:HGNC Symbol;Acc:HGNC:33754]
107	UIMC1	2.18878925173444e-251	0.345328644885889	0.685	0.252	3.44909410288314e-247	ubiquitin interaction motif containing 1 [Source:HGNC Symbol;Acc:HGNC:30298]
108	GKAP1	3.67587521423054e-251	0.471807940080258	0.856	0.379	5.79244416258449e-247	G kinase anchoring protein 1 [Source:HGNC Symbol;Acc:HGNC:17496]
109	RAB1A	5.56443242954882e-251	0.344585583987532	0.8	0.32	8.76843262248303e-247	RAB1A, member RAS oncogene family [Source:HGNC Symbol;Acc:HGNC:9758]
110	CD164	7.03019106249366e-251	0.459155474309579	0.674	0.245	1.10781750762775e-246	CD164 molecule [Source:HGNC Symbol;Acc:HGNC:1632]
111	KCMF1	1.34521878452069e-250	0.346017380581057	0.697	0.261	2.1197957606477e-246	potassium channel modulatory factor 1 [Source:HGNC Symbol;Acc:HGNC:20589]
112	NEUROD1	1.60365948241091e-250	0.787539094100248	0.949	0.444	2.52704661238311e-246	neuronal differentiation 1 [Source:HGNC Symbol;Acc:HGNC:7762]
113	SMAD5	5.03439709672232e-250	0.570386162391818	0.824	0.33	7.93320294501504e-246	SMAD family member 5 [Source:HGNC Symbol;Acc:HGNC:6771]
114	ALDOA	1.05451139883134e-249	0.36089770278799	0.701	0.26	1.66169906227843e-245	aldolase, fructose-bisphosphate A [Source:HGNC Symbol;Acc:HGNC:414]
115	IMPDH2	1.17544784314749e-248	0.330140042189326	0.869	0.38	1.85227071123181e-244	inosine monophosphate dehydrogenase 2 [Source:HGNC Symbol;Acc:HGNC:6053]
116	HMGCR	7.52914566347476e-248	0.597554823053461	0.809	0.335	1.18644277365035e-243	3-hydroxy-3-methylglutaryl-CoA reductase [Source:HGNC Symbol;Acc:HGNC:5006]
117	TIAL1	3.61317930398201e-247	0.42579811927531	0.854	0.359	5.69364794721484e-243	TIA1 cytotoxic granule associated RNA binding protein like 1 [Source:HGNC Symbol;Acc:HGNC:11804]
118	HILPDA	4.05249881889052e-247	0.475126031141209	0.679	0.248	6.38592763880768e-243	hypoxia inducible lipid droplet associated [Source:HGNC Symbol;Acc:HGNC:28859]
119	H1-5	4.37449930226569e-247	-2.3868201867422	0.233	0.581	6.89333600051027e-243	H1.5 linker histone, cluster member [Source:HGNC Symbol;Acc:HGNC:4719]
120	EIF2A	3.07145769180573e-246	0.319038290626365	0.799	0.334	4.84000303074746e-242	eukaryotic translation initiation factor 2A [Source:HGNC Symbol;Acc:HGNC:3254]
121	JUNB	6.83197597678596e-245	0.369384529809347	0.644	0.228	1.07658277442193e-240	JunB proto-oncogene, AP-1 transcription factor subunit [Source:HGNC Symbol;Acc:HGNC:6205]
122	SRRM1	7.33576150160242e-245	0.698414991546095	0.951	0.484	1.15596929742251e-240	serine and arginine repetitive matrix 1 [Source:HGNC Symbol;Acc:HGNC:16638]
123	MEAF6	7.91789211799187e-244	0.304554066931755	0.834	0.344	1.24770143995316e-239	MYST/Esa1 associated factor 6 [Source:HGNC Symbol;Acc:HGNC:25674]
124	CLK1	3.02830632475134e-243	0.510636268640277	0.695	0.264	4.77200510654316e-239	CDC like kinase 1 [Source:HGNC Symbol;Acc:HGNC:2068]
125	HSP90B1	9.84093979148819e-243	0.907699979039267	0.921	0.434	1.55073529234271e-238	heat shock protein 90 beta family member 1 [Source:HGNC Symbol;Acc:HGNC:12028]
126	SCML1	1.90443310230324e-242	0.423897372659736	0.755	0.294	3.00100568260944e-238	Scm polycomb group protein like 1 [Source:HGNC Symbol;Acc:HGNC:10580]
127	MORF4L1	2.8425822362294e-242	0.473138807772597	0.925	0.431	4.47934108785028e-238	mortality factor 4 like 1 [Source:HGNC Symbol;Acc:HGNC:16989]
128	EIF1	2.20224137298311e-241	0.966509696307135	0.969	0.714	3.47029195554678e-237	eukaryotic translation initiation factor 1 [Source:HGNC Symbol;Acc:HGNC:3249]
129	DUSP12	4.35573035656195e-241	0.319579059752033	0.703	0.268	6.86375989587032e-237	dual specificity phosphatase 12 [Source:HGNC Symbol;Acc:HGNC:3067]
130	EIF4E	1.13982954490028e-240	0.296345046120912	0.799	0.329	1.79614339685386e-236	eukaryotic translation initiation factor 4E [Source:HGNC Symbol;Acc:HGNC:3287]
131	RBM22	1.05984240397835e-239	0.358901345203704	0.683	0.256	1.67009966018908e-235	RNA binding motif protein 22 [Source:HGNC Symbol;Acc:HGNC:25503]
132	SMIM26	2.31467322875089e-239	0.338159327186725	0.864	0.394	3.64746207386565e-235	small integral membrane protein 26 [Source:HGNC Symbol;Acc:HGNC:43430]
133	DYNC1LI1	3.82480232578359e-239	0.280980302650112	0.773	0.316	6.02712350496978e-235	dynein cytoplasmic 1 light intermediate chain 1 [Source:HGNC Symbol;Acc:HGNC:18745]
134	MPHOSPH10	2.29527476233139e-238	0.467241448153327	0.801	0.332	3.6168939704818e-234	M-phase phosphoprotein 10 [Source:HGNC Symbol;Acc:HGNC:7213]
135	C2orf69	5.23182260859796e-238	0.507672627077444	0.643	0.229	8.24430606662866e-234	chromosome 2 open reading frame 69 [Source:HGNC Symbol;Acc:HGNC:26799]
136	NUFIP2	1.24247399892972e-237	0.513868410690728	0.826	0.356	1.95789052751345e-233	nuclear FMR1 interacting protein 2 [Source:HGNC Symbol;Acc:HGNC:17634]
137	PPP1R2	2.67576579373254e-237	0.397157904577147	0.715	0.277	4.21647173776373e-233	protein phosphatase 1 regulatory inhibitor subunit 2 [Source:HGNC Symbol;Acc:HGNC:9288]
138	HSPA1B	1.18948925535179e-236	1.69256163803436	0.572	0.167	1.87439716858335e-232	heat shock protein family A (Hsp70) member 1B [Source:HGNC Symbol;Acc:HGNC:5233]
139	TRAM1	3.23302931647654e-236	0.377037786291839	0.685	0.259	5.09460759690374e-232	translocation associated membrane protein 1 [Source:HGNC Symbol;Acc:HGNC:20568]
140	NR1D2	1.07401263231828e-235	0.506070613589614	0.661	0.242	1.69242910600714e-231	nuclear receptor subfamily 1 group D member 2 [Source:HGNC Symbol;Acc:HGNC:7963]
141	WBP11	1.32487545559681e-235	0.388071692226238	0.832	0.347	2.08773874292945e-231	WW domain binding protein 11 [Source:HGNC Symbol;Acc:HGNC:16461]
142	MXI1	1.61205393864692e-235	0.388891464274327	0.78	0.326	2.54027459651982e-231	MAX interactor 1, dimerization protein [Source:HGNC Symbol;Acc:HGNC:7534]
143	POLR2C	1.4678273186068e-234	0.282326907374226	0.751	0.299	2.3130022886606e-230	RNA polymerase II subunit C [Source:HGNC Symbol;Acc:HGNC:9189]
144	ZC3H15	2.28211874539976e-234	0.351860368031544	0.896	0.393	3.59616271900094e-230	zinc finger CCCH-type containing 15 [Source:HGNC Symbol;Acc:HGNC:29528]
145	SRSF11	3.48927461023523e-234	0.604281816139877	0.941	0.462	5.49839893080868e-230	serine and arginine rich splicing factor 11 [Source:HGNC Symbol;Acc:HGNC:10782]
146	TMEM242	7.24870648081214e-234	0.309942701215137	0.656	0.244	1.14225116724638e-229	transmembrane protein 242 [Source:HGNC Symbol;Acc:HGNC:17206]
147	CIR1	4.29233140282996e-233	0.390414137597965	0.711	0.283	6.76385582457946e-229	corepressor interacting with RBPJ, CIR1 [Source:HGNC Symbol;Acc:HGNC:24217]
148	SLC38A2	4.58538957092635e-233	0.392874073693726	0.824	0.355	7.22565688586574e-229	solute carrier family 38 member 2 [Source:HGNC Symbol;Acc:HGNC:13448]
149	EIF3H	1.11647445949108e-232	0.520965493905489	0.914	0.463	1.75934045326605e-228	eukaryotic translation initiation factor 3 subunit H [Source:HGNC Symbol;Acc:HGNC:3273]
150	RPL17	1.97336325537868e-232	0.267784892706729	0.887	0.408	3.10962581782573e-228	ribosomal protein L17 [Source:HGNC Symbol;Acc:HGNC:10307]
151	PHF1	2.10408537171507e-232	0.443545207677978	0.736	0.294	3.31561772874861e-228	PHD finger protein 1 [Source:HGNC Symbol;Acc:HGNC:8919]
152	RSBN1L	2.20486753837239e-232	0.462191961105408	0.887	0.389	3.47443026696721e-228	round spermatid basic protein 1 like [Source:HGNC Symbol;Acc:HGNC:24765]
153	TMEM38B	2.62445834874976e-232	0.396770726082472	0.874	0.389	4.13562146595988e-228	transmembrane protein 38B [Source:HGNC Symbol;Acc:HGNC:25535]
154	BUD31	7.39727809426945e-231	0.33995447960979	0.821	0.358	1.16566308209498e-226	BUD31 homolog [Source:HGNC Symbol;Acc:HGNC:29629]
155	RAB11A	3.27248346575603e-230	0.286583649699792	0.826	0.361	5.15677944533835e-226	RAB11A, member RAS oncogene family [Source:HGNC Symbol;Acc:HGNC:9760]
156	LSM12	1.78607508033296e-229	0.315487867951017	0.707	0.281	2.81449711158867e-225	LSM12 homolog [Source:HGNC Symbol;Acc:HGNC:26407]
157	NECAP1	1.60309931431491e-228	0.556607328697857	0.602	0.209	2.52616389949744e-224	NECAP endocytosis associated 1 [Source:HGNC Symbol;Acc:HGNC:24539]
158	GPBP1	6.20225296945956e-228	0.442782169408847	0.9	0.404	9.77351022927438e-224	GC-rich promoter binding protein 1 [Source:HGNC Symbol;Acc:HGNC:29520]
159	IST1	1.03540088701799e-227	0.469499452499523	0.69	0.265	1.63158471776294e-223	IST1 factor associated with ESCRT-III [Source:HGNC Symbol;Acc:HGNC:28977]
160	DNAJA2	1.30298434423103e-227	0.282065001448548	0.751	0.303	2.05324272963926e-223	DnaJ heat shock protein family (Hsp40) member A2 [Source:HGNC Symbol;Acc:HGNC:14884]
161	JMJD6	5.03353505032169e-227	0.397290130226572	0.648	0.242	7.93184453229691e-223	jumonji domain containing 6, arginine demethylase and lysine hydroxylase [Source:HGNC Symbol;Acc:HGNC:19355]
162	PRPF39	5.39739567760383e-227	0.525751438905545	0.603	0.208	8.50521610876812e-223	pre-mRNA processing factor 39 [Source:HGNC Symbol;Acc:HGNC:20314]
163	SSR3	7.76396296200743e-227	0.287649752572191	0.865	0.385	1.22344528355313e-222	signal sequence receptor subunit 3 [Source:HGNC Symbol;Acc:HGNC:11325]
164	LMO4	9.75254832534113e-227	0.424115141619947	0.821	0.343	1.53680656510726e-222	LIM domain only 4 [Source:HGNC Symbol;Acc:HGNC:6644]
165	ALKBH5	1.13420157323744e-225	0.329299983207807	0.725	0.284	1.78727483910756e-221	alkB homolog 5, RNA demethylase [Source:HGNC Symbol;Acc:HGNC:25996]
166	PCBD1	3.10299934326356e-225	0.329499474935731	0.589	0.199	4.88970636511472e-221	pterin-4 alpha-carbinolamine dehydratase 1 [Source:HGNC Symbol;Acc:HGNC:8646]
167	MRPL34	8.03911976178843e-225	0.36086305875103	0.868	0.392	1.26680449206262e-220	mitochondrial ribosomal protein L34 [Source:HGNC Symbol;Acc:HGNC:14488]
168	RBM33	9.56438480106621e-225	0.452898854684426	0.723	0.297	1.50715575695201e-220	RNA binding motif protein 33 [Source:HGNC Symbol;Acc:HGNC:27223]
169	GLUL	1.10522259752471e-224	0.253832208425521	0.745	0.303	1.74160976917943e-220	glutamate-ammonia ligase [Source:HGNC Symbol;Acc:HGNC:4341]
170	RALBP1	2.0918970791811e-224	0.345149729215954	0.83	0.354	3.29641141737358e-220	ralA binding protein 1 [Source:HGNC Symbol;Acc:HGNC:9841]
171	NPC2	3.35883674620707e-224	0.292804323611331	0.575	0.183	5.29285494467311e-220	NPC intracellular cholesterol transporter 2 [Source:HGNC Symbol;Acc:HGNC:14537]
172	FIP1L1	5.15533985155711e-224	0.298386556745633	0.685	0.27	8.12378453808369e-220	factor interacting with PAPOLA and CPSF1 [Source:HGNC Symbol;Acc:HGNC:19124]
173	SF3B2	9.27188092447958e-224	0.430587899242797	0.883	0.374	1.46106299607949e-219	splicing factor 3b subunit 2 [Source:HGNC Symbol;Acc:HGNC:10769]
174	ZMAT3	1.17677166124071e-223	0.622053872121072	0.572	0.181	1.85435678378311e-219	zinc finger matrin-type 3 [Source:HGNC Symbol;Acc:HGNC:29983]
175	BBC3	2.25073458112643e-223	0.302574685428608	0.597	0.195	3.54670755293903e-219	BCL2 binding component 3 [Source:HGNC Symbol;Acc:HGNC:17868]
176	TRIAP1	5.11251890753398e-223	0.261375254428253	0.679	0.259	8.05630729449204e-219	TP53 regulated inhibitor of apoptosis 1 [Source:HGNC Symbol;Acc:HGNC:26937]
177	BHLHE40	8.81420289575402e-223	0.624522935450944	0.416	0.052	1.38894209231292e-218	basic helix-loop-helix family member e40 [Source:HGNC Symbol;Acc:HGNC:1046]
178	DUSP1	1.34786116492519e-222	0.578205489220049	0.538	0.159	2.12395962368912e-218	dual specificity phosphatase 1 [Source:HGNC Symbol;Acc:HGNC:3064]
179	RPS8	1.70027637072113e-222	0.571493489516634	0.985	0.931	2.67929550498236e-218	ribosomal protein S8 [Source:HGNC Symbol;Acc:HGNC:10441]
180	CNBP	2.91985174812827e-222	0.538177845750506	0.921	0.446	4.60110238470052e-218	CCHC-type zinc finger nucleic acid binding protein [Source:HGNC Symbol;Acc:HGNC:13164]
181	ARPP19	5.32034305461478e-222	0.450400880032727	0.91	0.427	8.38379658546197e-218	cAMP regulated phosphoprotein 19 [Source:HGNC Symbol;Acc:HGNC:16967]
182	BRD2	8.64754640293833e-222	0.686838804435201	0.963	0.469	1.36268036217502e-217	bromodomain containing 2 [Source:HGNC Symbol;Acc:HGNC:1103]
183	LUC7L2	1.10462711784933e-221	0.344792265132711	0.732	0.29	1.74067141230697e-217	LUC7 like 2, pre-mRNA splicing factor [Source:HGNC Symbol;Acc:HGNC:21608]
184	LMAN1	2.98453485385659e-221	0.418159598090382	0.864	0.374	4.70303002270722e-217	lectin, mannose binding 1 [Source:HGNC Symbol;Acc:HGNC:6631]
185	SUCO	7.4459030698653e-220	0.449678453001069	0.696	0.281	1.17332540574937e-215	SUN domain containing ossification factor [Source:HGNC Symbol;Acc:HGNC:1240]
186	MMADHC	1.24020610410892e-219	0.346030916798134	0.674	0.263	1.95431677885484e-215	metabolism of cobalamin associated D [Source:HGNC Symbol;Acc:HGNC:25221]
187	KPNA4	2.65269266297873e-219	0.336165502717129	0.748	0.311	4.18011309832188e-215	karyopherin subunit alpha 4 [Source:HGNC Symbol;Acc:HGNC:6397]
188	OGA	1.06922087542072e-218	0.609706617468265	0.794	0.328	1.68487825548796e-214	O-GlcNAcase [Source:HGNC Symbol;Acc:HGNC:7056]
189	MTF2	1.24074703941973e-218	0.467472914472023	0.809	0.344	1.95516918471761e-214	metal response element binding transcription factor 2 [Source:HGNC Symbol;Acc:HGNC:29535]
190	COPB1	1.58587377983994e-218	0.337550560014404	0.746	0.313	2.49901990227177e-214	COPI coat complex subunit beta 1 [Source:HGNC Symbol;Acc:HGNC:2231]
191	ZMYM5	1.82098503599931e-218	0.413380491679416	0.668	0.263	2.86950821972771e-214	zinc finger MYM-type containing 5 [Source:HGNC Symbol;Acc:HGNC:13029]
192	APP	1.45324643239956e-217	0.380830685150272	0.812	0.345	2.29002572817523e-213	amyloid beta precursor protein [Source:HGNC Symbol;Acc:HGNC:620]
193	CGGBP1	1.71418168329573e-217	0.250360251888245	0.776	0.33	2.70120749653741e-213	CGG triplet repeat binding protein 1 [Source:HGNC Symbol;Acc:HGNC:1888]
194	MAN1A2	2.11321765355171e-217	0.367149268417981	0.724	0.285	3.33000837846679e-213	mannosidase alpha class 1A member 2 [Source:HGNC Symbol;Acc:HGNC:6822]
195	SAP18	2.12442692670849e-217	0.358531798560002	0.902	0.448	3.34767195110724e-213	Sin3A associated protein 18 [Source:HGNC Symbol;Acc:HGNC:10530]
196	RABGGTB	3.50400551152631e-217	0.355258660408261	0.628	0.234	5.52161188506316e-213	Rab geranylgeranyltransferase subunit beta [Source:HGNC Symbol;Acc:HGNC:9796]
197	HBP1	8.26652026865103e-217	0.418657711941014	0.54	0.159	1.30263826393403e-212	HMG-box transcription factor 1 [Source:HGNC Symbol;Acc:HGNC:23200]
198	GGNBP2	2.50627887198119e-216	0.285072805288083	0.794	0.347	3.94939424646796e-212	gametogenetin binding protein 2 [Source:HGNC Symbol;Acc:HGNC:19357]
199	RBM25	5.43743267466463e-216	0.567223948934186	0.925	0.424	8.56830640873653e-212	RNA binding motif protein 25 [Source:HGNC Symbol;Acc:HGNC:23244]
200	RHOB	6.76639905845081e-216	0.33677124898691	0.574	0.187	1.06624916363068e-211	ras homolog family member B [Source:HGNC Symbol;Acc:HGNC:668]
201	TMEM183A	2.12385256607277e-215	0.268429998551002	0.843	0.352	3.34676687361748e-211	transmembrane protein 183A [Source:HGNC Symbol;Acc:HGNC:20173]
202	RAD21	2.98367785110204e-215	0.730010640056017	0.939	0.451	4.7016795577666e-211	RAD21 cohesin complex component [Source:HGNC Symbol;Acc:HGNC:9811]
203	SIKE1	3.17018341833123e-215	0.25140589806262	0.669	0.264	4.99557503060635e-211	suppressor of IKBKE 1 [Source:HGNC Symbol;Acc:HGNC:26119]
204	CDV3	4.08735472658626e-215	0.32603767809845	0.881	0.392	6.44085357815463e-211	CDV3 homolog [Source:HGNC Symbol;Acc:HGNC:26928]
205	C1orf52	2.22713305018532e-214	0.335490752045893	0.631	0.236	3.50951626048202e-210	chromosome 1 open reading frame 52 [Source:HGNC Symbol;Acc:HGNC:24871]
206	PTBP3	2.76587536281641e-214	0.389544832318152	0.767	0.317	4.3584663967261e-210	polypyrimidine tract binding protein 3 [Source:HGNC Symbol;Acc:HGNC:10253]
207	ALYREF	3.29585068929192e-214	0.307881883545154	0.721	0.289	5.19360151618621e-210	Aly/REF export factor [Source:HGNC Symbol;Acc:HGNC:19071]
208	CAMLG	3.42648376615344e-214	0.462924716029927	0.929	0.462	5.3994531187046e-210	calcium modulating ligand [Source:HGNC Symbol;Acc:HGNC:1471]
209	PREPL	4.08890212618424e-214	0.325269794071834	0.752	0.312	6.44329197044113e-210	prolyl endopeptidase like [Source:HGNC Symbol;Acc:HGNC:30228]
210	TMED9	4.42472964635786e-214	0.30182138444028	0.729	0.302	6.97248897673072e-210	transmembrane p24 trafficking protein 9 [Source:HGNC Symbol;Acc:HGNC:24878]
211	CALR	1.05176722269765e-213	0.784699287269875	0.927	0.48	1.65737478952695e-209	calreticulin [Source:HGNC Symbol;Acc:HGNC:1455]
212	PPP4R2	1.15643997864069e-213	0.332236169235836	0.77	0.325	1.82231811834201e-209	protein phosphatase 4 regulatory subunit 2 [Source:HGNC Symbol;Acc:HGNC:18296]
213	P4HA1	1.20745359061672e-213	0.590712548010154	0.775	0.344	1.90270536809383e-209	prolyl 4-hydroxylase subunit alpha 1 [Source:HGNC Symbol;Acc:HGNC:8546]
214	UBQLN1	2.22497610746028e-213	0.263806380999661	0.841	0.367	3.50611735013591e-209	ubiquilin 1 [Source:HGNC Symbol;Acc:HGNC:12508]
215	FNBP4	5.45517555495177e-213	0.389775567721862	0.732	0.3	8.596265639493e-209	formin binding protein 4 [Source:HGNC Symbol;Acc:HGNC:19752]
216	STXBP1	1.09738300006457e-212	0.312434605835639	0.765	0.316	1.72925613150175e-208	syntaxin binding protein 1 [Source:HGNC Symbol;Acc:HGNC:11444]
217	BCLAF1	4.60932401602663e-212	0.744732177843796	0.888	0.391	7.26337278445477e-208	BCL2 associated transcription factor 1 [Source:HGNC Symbol;Acc:HGNC:16863]
218	BNIP1	9.41295162305977e-212	0.303237430951323	0.539	0.17	1.48329291676176e-207	BCL2 interacting protein 1 [Source:HGNC Symbol;Acc:HGNC:1082]
219	NSD3	1.00305480730822e-211	0.47001640736025	0.925	0.426	1.58061376535629e-207	nuclear receptor binding SET domain protein 3 [Source:HGNC Symbol;Acc:HGNC:12767]
220	EPC1	1.47563671690321e-211	0.297180878793044	0.752	0.313	2.32530833849608e-207	enhancer of polycomb homolog 1 [Source:HGNC Symbol;Acc:HGNC:19876]
221	CDC5L	1.65454244766014e-211	0.561434184633006	0.924	0.442	2.60722798902284e-207	cell division cycle 5 like [Source:HGNC Symbol;Acc:HGNC:1743]
222	ELOVL5	2.23349071567058e-211	0.415274819156949	0.893	0.406	3.5195346697537e-207	ELOVL fatty acid elongase 5 [Source:HGNC Symbol;Acc:HGNC:21308]
223	TMSB4X	3.12379691714916e-211	-0.798602443828025	0.972	0.977	4.92247918204364e-207	thymosin beta 4 X-linked [Source:HGNC Symbol;Acc:HGNC:11881]
224	PTAR1	6.57807236417855e-210	0.509484976162818	0.782	0.337	1.03657264314726e-205	protein prenyltransferase alpha subunit repeat containing 1 [Source:HGNC Symbol;Acc:HGNC:30449]
225	RBM39	2.57166192653205e-209	0.832955323734368	0.974	0.542	4.05242486382921e-205	RNA binding motif protein 39 [Source:HGNC Symbol;Acc:HGNC:15923]
226	RP9	1.02553687437455e-208	0.379413807753739	0.639	0.247	1.61604100663942e-204	RP9 pre-mRNA splicing factor [Source:HGNC Symbol;Acc:HGNC:10288]
227	ZIC2	1.80474629781793e-208	0.444334604034005	0.624	0.232	2.84391921610149e-204	Zic family member 2 [Source:HGNC Symbol;Acc:HGNC:12873]
228	PDE6H	2.32374150426911e-208	0.856769791243913	0.656	0.264	3.66175186242726e-204	phosphodiesterase 6H [Source:HGNC Symbol;Acc:HGNC:8790]
229	ZNF24	3.04554952096718e-208	0.371725705786548	0.726	0.295	4.79917693514009e-204	zinc finger protein 24 [Source:HGNC Symbol;Acc:HGNC:13032]
230	IER5L	4.62828616942152e-208	0.287713014765418	0.617	0.224	7.29325334577444e-204	immediate early response 5 like [Source:HGNC Symbol;Acc:HGNC:23679]
231	RCOR3	1.16957976403135e-207	0.335014376164746	0.661	0.262	1.8430237921606e-203	REST corepressor 3 [Source:HGNC Symbol;Acc:HGNC:25594]
232	DRAM2	1.8367894236961e-207	0.284373705166671	0.596	0.217	2.89441277386031e-203	DNA damage regulated autophagy modulator 2 [Source:HGNC Symbol;Acc:HGNC:28769]
233	FGFR1OP2	2.12930935340034e-207	0.287193516936142	0.656	0.26	3.35536567908826e-203	FGFR1 oncogene partner 2 [Source:HGNC Symbol;Acc:HGNC:23098]
234	CEBPB	2.77046506066482e-207	0.341349569304991	0.442	0.077	4.36569884259562e-203	CCAAT enhancer binding protein beta [Source:HGNC Symbol;Acc:HGNC:1834]
235	SPTY2D1	3.21007897752704e-207	0.539265460352843	0.531	0.169	5.05844245278711e-203	SPT2 chromatin protein domain containing 1 [Source:HGNC Symbol;Acc:HGNC:26818]
236	ITM2B	8.04998256900621e-207	0.422097429900224	0.876	0.404	1.268516253224e-202	integral membrane protein 2B [Source:HGNC Symbol;Acc:HGNC:6174]
237	CEBPG	1.41609164060651e-206	0.412730248637727	0.638	0.25	2.23147720726774e-202	CCAAT enhancer binding protein gamma [Source:HGNC Symbol;Acc:HGNC:1837]
238	TOMM20	1.24387866677907e-205	0.725029890067018	0.946	0.595	1.96010400311046e-201	translocase of outer mitochondrial membrane 20 [Source:HGNC Symbol;Acc:HGNC:20947]
239	TMEM106C	1.20259193809723e-204	0.37986045501479	0.737	0.314	1.89504437605362e-200	transmembrane protein 106C [Source:HGNC Symbol;Acc:HGNC:28775]
240	ARFGAP3	1.89590110605608e-204	0.321300093420336	0.603	0.227	2.98756096292317e-200	ADP ribosylation factor GTPase activating protein 3 [Source:HGNC Symbol;Acc:HGNC:661]
241	ERO1A	2.43198850282075e-204	0.27995159229302	0.744	0.311	3.83232748274494e-200	endoplasmic reticulum oxidoreductase 1 alpha [Source:HGNC Symbol;Acc:HGNC:13280]
242	BRI3	2.89667905666415e-204	0.260815754978016	0.856	0.394	4.56458685749136e-200	brain protein I3 [Source:HGNC Symbol;Acc:HGNC:1109]
243	AFF4	3.13579981541206e-204	0.5481715599841	0.79	0.338	4.94139334912632e-200	AF4/FMR2 family member 4 [Source:HGNC Symbol;Acc:HGNC:17869]
244	SREK1IP1	4.67082754741775e-204	0.259367588165353	0.781	0.333	7.36029004922089e-200	SREK1 interacting protein 1 [Source:HGNC Symbol;Acc:HGNC:26716]
245	WDR45B	5.07016025857164e-204	0.280253241531052	0.618	0.234	7.98955853545719e-200	WD repeat domain 45B [Source:HGNC Symbol;Acc:HGNC:25072]
246	SREK1	1.29215880032944e-203	0.552500764979425	0.811	0.349	2.03618383755913e-199	splicing regulatory glutamic acid and lysine rich protein 1 [Source:HGNC Symbol;Acc:HGNC:17882]
247	CDC42	2.03500540681088e-203	0.36726968240469	0.909	0.443	3.20676152005258e-199	cell division cycle 42 [Source:HGNC Symbol;Acc:HGNC:1736]
248	TMCO3	3.36382609656196e-203	0.254721268732627	0.722	0.308	5.30071716296233e-199	transmembrane and coiled-coil domains 3 [Source:HGNC Symbol;Acc:HGNC:20329]
249	RSBN1	4.11924187645153e-203	0.449052743138593	0.701	0.294	6.49110134891232e-199	round spermatid basic protein 1 [Source:HGNC Symbol;Acc:HGNC:25642]
250	SRP54	7.44616929247661e-203	0.317192887828044	0.733	0.317	1.17336735710846e-198	signal recognition particle 54 [Source:HGNC Symbol;Acc:HGNC:11301]
251	SAT2	1.08777396666895e-202	0.308167928762765	0.741	0.308	1.71411421667694e-198	spermidine/spermine N1-acetyltransferase family member 2 [Source:HGNC Symbol;Acc:HGNC:23160]
252	TERF2IP	1.39854625419096e-202	0.326135751372379	0.878	0.393	2.20382918735412e-198	TERF2 interacting protein [Source:HGNC Symbol;Acc:HGNC:19246]
253	MIEN1	1.75362599308792e-202	0.259004593798792	0.677	0.267	2.76336383990794e-198	migration and invasion enhancer 1 [Source:HGNC Symbol;Acc:HGNC:28230]
254	TMEM59	3.98170364536614e-202	0.292230517625837	0.874	0.414	6.27436860436796e-198	transmembrane protein 59 [Source:HGNC Symbol;Acc:HGNC:1239]
255	IK	1.83383520635829e-201	0.322744140866513	0.88	0.394	2.88975751817939e-197	IK cytokine [Source:HGNC Symbol;Acc:HGNC:5958]
256	YPEL2	2.54197199312036e-201	0.470698983395782	0.625	0.241	4.00563946675906e-197	yippee like 2 [Source:HGNC Symbol;Acc:HGNC:18326]
257	PPP2R2A	4.40569263671849e-201	0.311221297323333	0.606	0.228	6.94249045694099e-197	protein phosphatase 2 regulatory subunit Balpha [Source:HGNC Symbol;Acc:HGNC:9304]
258	RWDD1	1.744461785783e-200	0.363405974255323	0.856	0.401	2.74892288203685e-196	RWD domain containing 1 [Source:HGNC Symbol;Acc:HGNC:20993]
259	NKTR	4.99372249243922e-200	0.505995813518533	0.911	0.421	7.86910790358573e-196	natural killer cell triggering receptor [Source:HGNC Symbol;Acc:HGNC:7833]
260	MPZL1	6.58398622780527e-200	0.303548280859308	0.727	0.3	1.03750454977755e-195	myelin protein zero like 1 [Source:HGNC Symbol;Acc:HGNC:7226]
261	SNX3	1.35058507647994e-199	0.290329140795809	0.843	0.372	2.1282519635171e-195	sorting nexin 3 [Source:HGNC Symbol;Acc:HGNC:11174]
262	SRPK2	2.25443786837346e-199	0.299586455191574	0.711	0.291	3.5525431929829e-195	SRSF protein kinase 2 [Source:HGNC Symbol;Acc:HGNC:11306]
263	PTPN2	2.52283291810893e-199	0.313258816783871	0.838	0.387	3.97548011235606e-195	protein tyrosine phosphatase non-receptor type 2 [Source:HGNC Symbol;Acc:HGNC:9650]
264	ZFAND5	3.28296745722201e-199	0.474451894014932	0.87	0.395	5.17330011909045e-195	zinc finger AN1-type containing 5 [Source:HGNC Symbol;Acc:HGNC:13008]
265	TOB1	4.76886503742184e-199	0.334334031309578	0.573	0.209	7.51477752596934e-195	transducer of ERBB2, 1 [Source:HGNC Symbol;Acc:HGNC:11979]
266	CCT4	5.40170809941294e-199	0.540522199429297	0.932	0.509	8.51201162305492e-195	chaperonin containing TCP1 subunit 4 [Source:HGNC Symbol;Acc:HGNC:1617]
267	MRPL17	1.10546598129461e-198	0.261546894307456	0.723	0.305	1.74199329332404e-194	mitochondrial ribosomal protein L17 [Source:HGNC Symbol;Acc:HGNC:14053]
268	TBL1XR1	1.1944905744583e-198	0.404933795018846	0.765	0.329	1.88227824723138e-194	TBL1X receptor 1 [Source:HGNC Symbol;Acc:HGNC:29529]
269	STARD7	9.96730020842125e-198	0.400241453583165	0.742	0.322	1.57064716684302e-193	StAR related lipid transfer domain containing 7 [Source:HGNC Symbol;Acc:HGNC:18063]
270	REEP3	2.6584611598358e-197	0.284546790202785	0.644	0.259	4.18920309566926e-193	receptor accessory protein 3 [Source:HGNC Symbol;Acc:HGNC:23711]
271	YOD1	3.13402453090342e-197	0.517903545254677	0.534	0.179	4.9385958557976e-193	YOD1 deubiquitinase [Source:HGNC Symbol;Acc:HGNC:25035]
272	ARMCX3	5.19630013373565e-197	0.300978855124392	0.672	0.276	8.18832975074064e-193	armadillo repeat containing X-linked 3 [Source:HGNC Symbol;Acc:HGNC:24065]
273	RPS15A	5.71859742363878e-197	0.521511617802538	0.981	0.952	9.01136582017e-193	ribosomal protein S15a [Source:HGNC Symbol;Acc:HGNC:10389]
274	CHEK1	1.76542877604215e-196	0.253367054035156	0.746	0.323	2.78196266528722e-192	checkpoint kinase 1 [Source:HGNC Symbol;Acc:HGNC:1925]
275	SIAH1	2.96578109489758e-196	0.344067774704233	0.6	0.231	4.67347784933961e-192	siah E3 ubiquitin protein ligase 1 [Source:HGNC Symbol;Acc:HGNC:10857]
276	PTBP1	3.09691767142026e-196	0.414341706474287	0.802	0.352	4.88012286662404e-192	polypyrimidine tract binding protein 1 [Source:HGNC Symbol;Acc:HGNC:9583]
277	IRS2	4.4822205486977e-196	0.427722701306696	0.671	0.271	7.06308314063784e-192	insulin receptor substrate 2 [Source:HGNC Symbol;Acc:HGNC:6126]
278	WTAP	5.0137100796238e-196	0.305423039842434	0.751	0.323	7.90060434347118e-192	WT1 associated protein [Source:HGNC Symbol;Acc:HGNC:16846]
279	H3-3A	5.05982905867788e-196	-0.562661229804559	0.978	0.986	7.9732786306646e-192	H3.3 histone A [Source:HGNC Symbol;Acc:HGNC:4764]
280	DHX15	6.20164902186915e-196	0.413126143976593	0.842	0.371	9.77255852866141e-192	DEAH-box helicase 15 [Source:HGNC Symbol;Acc:HGNC:2738]
281	ARID4B	1.184338782757e-195	0.480241331556989	0.838	0.364	1.86628105386848e-191	AT-rich interaction domain 4B [Source:HGNC Symbol;Acc:HGNC:15550]
282	MIER1	2.18481000430556e-195	0.328992949573249	0.689	0.288	3.4428236047847e-191	MIER1 transcriptional regulator [Source:HGNC Symbol;Acc:HGNC:29657]
283	YPEL3	3.22109195993621e-195	0.317405443349021	0.586	0.214	5.07579671046748e-191	yippee like 3 [Source:HGNC Symbol;Acc:HGNC:18327]
284	SH3BGRL3	4.2791088623644e-195	0.503512963999764	0.864	0.414	6.74301974531382e-191	SH3 domain binding glutamate rich protein like 3 [Source:HGNC Symbol;Acc:HGNC:15568]
285	REEP5	4.77398109959738e-195	0.261613042259626	0.641	0.25	7.52283941674556e-191	receptor accessory protein 5 [Source:HGNC Symbol;Acc:HGNC:30077]
286	PNN	5.22909735946943e-195	0.586402906064009	0.948	0.491	8.24001161905192e-191	pinin, desmosome associated protein [Source:HGNC Symbol;Acc:HGNC:9162]
287	ACSL3	6.8509153036771e-195	0.362122512559823	0.769	0.327	1.07956723355344e-190	acyl-CoA synthetase long chain family member 3 [Source:HGNC Symbol;Acc:HGNC:3570]
288	CDKN1A	3.69341088207442e-194	0.703762361409326	0.662	0.255	5.82007686797287e-190	cyclin dependent kinase inhibitor 1A [Source:HGNC Symbol;Acc:HGNC:1784]
289	RNF114	4.5030918183787e-194	0.292708220575479	0.638	0.247	7.09597208740115e-190	ring finger protein 114 [Source:HGNC Symbol;Acc:HGNC:13094]
290	HEXIM1	5.13099023147419e-194	0.294136136311373	0.508	0.142	8.08541440675703e-190	HEXIM P-TEFb complex subunit 1 [Source:HGNC Symbol;Acc:HGNC:24953]
291	RO60	1.24546693844624e-193	0.26726272080925	0.837	0.373	1.96260680160358e-189	Ro60, Y RNA binding protein [Source:HGNC Symbol;Acc:HGNC:11313]
292	LAMTOR3	3.02017991900392e-193	0.265389299672506	0.577	0.217	4.75919951636638e-189	late endosomal/lysosomal adaptor, MAPK and MTOR activator 3 [Source:HGNC Symbol;Acc:HGNC:15606]
293	PRPF40A	1.16621432586129e-192	0.473696275851694	0.92	0.418	1.83772053469222e-188	pre-mRNA processing factor 40 homolog A [Source:HGNC Symbol;Acc:HGNC:16463]
294	H2AC20	1.4144315459725e-192	-2.20954205033427	0.64	0.722	2.22886123014347e-188	H2A clustered histone 20 [Source:HGNC Symbol;Acc:HGNC:4738]
295	UBC	2.37100037764222e-192	0.821869042972019	0.966	0.591	3.7362223950886e-188	ubiquitin C [Source:HGNC Symbol;Acc:HGNC:12468]
296	RPL24	2.51611444249893e-192	0.534414277528207	0.981	0.918	3.96489313848982e-188	ribosomal protein L24 [Source:HGNC Symbol;Acc:HGNC:10325]
297	ERP29	3.27092037634642e-192	0.422472918551042	0.913	0.467	5.15431632904669e-188	endoplasmic reticulum protein 29 [Source:HGNC Symbol;Acc:HGNC:13799]
298	ID2	2.95000901162157e-191	0.409550227538135	0.44	0.086	4.64862420051327e-187	inhibitor of DNA binding 2 [Source:HGNC Symbol;Acc:HGNC:5361]
299	STMN1	8.19146281544657e-191	-0.645263075235714	0.985	0.98	1.29081071045807e-186	stathmin 1 [Source:HGNC Symbol;Acc:HGNC:6510]
300	TCERG1	1.01115455372514e-190	0.409171731132591	0.846	0.381	1.59337734576008e-186	transcription elongation regulator 1 [Source:HGNC Symbol;Acc:HGNC:15630]
301	SAFB2	3.38574086238649e-190	0.480851392918661	0.715	0.303	5.33525045094864e-186	scaffold attachment factor B2 [Source:HGNC Symbol;Acc:HGNC:21605]
302	PPP2CA	5.1530078648358e-190	0.368276122450211	0.855	0.382	8.12010979340825e-186	protein phosphatase 2 catalytic subunit alpha [Source:HGNC Symbol;Acc:HGNC:9299]
303	CDT1	6.10336837603766e-190	0.355360413605238	0.784	0.345	9.61768788696015e-186	chromatin licensing and DNA replication factor 1 [Source:HGNC Symbol;Acc:HGNC:24576]
304	YTHDC1	1.0147985942838e-189	0.354810271577811	0.838	0.382	1.59911962487242e-185	YTH domain containing 1 [Source:HGNC Symbol;Acc:HGNC:30626]
305	CENPC	1.16273810330688e-189	0.471335043971477	0.706	0.306	1.83224270319098e-185	centromere protein C [Source:HGNC Symbol;Acc:HGNC:1854]
306	ATF4	1.57249501824429e-189	0.530408589756647	0.922	0.482	2.47793764974935e-185	activating transcription factor 4 [Source:HGNC Symbol;Acc:HGNC:786]
307	CCDC6	1.79633057135501e-189	0.34751294118165	0.619	0.25	2.83065771434122e-185	coiled-coil domain containing 6 [Source:HGNC Symbol;Acc:HGNC:18782]
308	ODR4	2.33957312769132e-189	0.330292968396406	0.699	0.298	3.68669933461597e-185	odr-4 GPCR localization factor homolog [Source:HGNC Symbol;Acc:HGNC:24299]
309	SLC39A7	3.50317379163817e-189	0.322411590848842	0.705	0.297	5.52030126086343e-185	solute carrier family 39 member 7 [Source:HGNC Symbol;Acc:HGNC:4927]
310	CALU	5.98263377861969e-189	0.344558007213369	0.714	0.297	9.4274343083489e-185	calumenin [Source:HGNC Symbol;Acc:HGNC:1458]
311	ANKRD10	1.83171068793334e-188	0.3121204865546	0.862	0.385	2.88640970204536e-184	ankyrin repeat domain 10 [Source:HGNC Symbol;Acc:HGNC:20265]
312	SF1	2.5410280410223e-188	0.538439645283547	0.891	0.399	4.00415198704294e-184	splicing factor 1 [Source:HGNC Symbol;Acc:HGNC:12950]
313	RAD1	3.39210755908002e-188	0.280697417798576	0.661	0.278	5.3452830915983e-184	RAD1 checkpoint DNA exonuclease [Source:HGNC Symbol;Acc:HGNC:9806]
314	G3BP2	6.09292125271745e-188	0.255214379614008	0.814	0.359	9.60122531003216e-184	G3BP stress granule assembly factor 2 [Source:HGNC Symbol;Acc:HGNC:30291]
315	PANK3	9.13637329763059e-188	0.564212321165176	0.886	0.413	1.43970970424063e-183	pantothenate kinase 3 [Source:HGNC Symbol;Acc:HGNC:19365]
316	VDAC2	2.02544946966883e-187	0.516530050419811	0.913	0.502	3.19170327430415e-183	voltage dependent anion channel 2 [Source:HGNC Symbol;Acc:HGNC:12672]
317	CCNT2	2.24184426190081e-187	0.389044776040206	0.621	0.249	3.5326981879033e-183	cyclin T2 [Source:HGNC Symbol;Acc:HGNC:1600]
318	DDX3X	4.54304317132718e-187	0.372333019658578	0.781	0.349	7.15892742937737e-183	DEAD-box helicase 3 X-linked [Source:HGNC Symbol;Acc:HGNC:2745]
319	MARCHF5	1.64706891026316e-186	0.266663798697273	0.58	0.217	2.59545118879269e-182	membrane associated ring-CH-type finger 5 [Source:HGNC Symbol;Acc:HGNC:26025]
320	PRPF4B	2.96592022196817e-186	0.380441868532671	0.96	0.484	4.67369708577744e-182	pre-mRNA processing factor 4B [Source:HGNC Symbol;Acc:HGNC:17346]
321	RBP7	2.63566397711973e-185	0.298704831283863	0.514	0.163	4.15327929514527e-181	retinol binding protein 7 [Source:HGNC Symbol;Acc:HGNC:30316]
322	TRA2A	8.25174885587536e-185	0.343340153339446	0.779	0.349	1.30031058470884e-180	transformer 2 alpha homolog [Source:HGNC Symbol;Acc:HGNC:16645]
323	PPIB	1.25890218201846e-184	0.264933316229228	0.837	0.375	1.98377805842468e-180	peptidylprolyl isomerase B [Source:HGNC Symbol;Acc:HGNC:9255]
324	TRMT112	1.38140019168811e-184	0.277010928447376	0.895	0.443	2.17681042206212e-180	tRNA methyltransferase subunit 11-2 [Source:HGNC Symbol;Acc:HGNC:26940]
325	DDX39B	2.30565551626221e-184	0.367863614648412	0.784	0.348	3.633251962526e-180	DExD-box helicase 39B [Source:HGNC Symbol;Acc:HGNC:13917]
326	RNF138	6.88570295881109e-184	0.338255315675258	0.589	0.231	1.08504907224945e-179	ring finger protein 138 [Source:HGNC Symbol;Acc:HGNC:17765]
327	PPP4R3A	7.57905033659051e-184	0.336106209050357	0.772	0.344	1.19430675203993e-179	protein phosphatase 4 regulatory subunit 3A [Source:HGNC Symbol;Acc:HGNC:20219]
328	DDX24	8.35951830528969e-184	0.367326417737172	0.906	0.438	1.31729289454755e-179	DEAD-box helicase 24 [Source:HGNC Symbol;Acc:HGNC:13266]
329	HSPA9	1.13129113296651e-183	0.509826865580535	0.885	0.409	1.78268856732863e-179	heat shock protein family A (Hsp70) member 9 [Source:HGNC Symbol;Acc:HGNC:5244]
330	RPS13	1.15671554718466e-183	0.523628588781497	0.967	0.917	1.82275235925359e-179	ribosomal protein S13 [Source:HGNC Symbol;Acc:HGNC:10386]
331	C1GALT1	1.33792658091951e-183	0.30874616349911	0.764	0.341	2.10830470621297e-179	core 1 synthase, glycoprotein-N-acetylgalactosamine 3-beta-galactosyltransferase 1 [Source:HGNC Symbol;Acc:HGNC:24337]
332	PURA	1.87209896410606e-183	0.333965358681745	0.838	0.371	2.95005354763833e-179	purine rich element binding protein A [Source:HGNC Symbol;Acc:HGNC:9701]
333	CUL3	8.56082180931197e-183	0.250035520137515	0.752	0.331	1.34901430071138e-178	cullin 3 [Source:HGNC Symbol;Acc:HGNC:2553]
334	PER3	9.71990986218087e-183	0.293465977405461	0.663	0.278	1.53166339608246e-178	period circadian regulator 3 [Source:HGNC Symbol;Acc:HGNC:8847]
335	ATF2	1.28444559671518e-182	0.287327166760548	0.651	0.273	2.02402937130377e-178	activating transcription factor 2 [Source:HGNC Symbol;Acc:HGNC:784]
336	UBE2R2	2.13168515380748e-182	0.294201175625213	0.763	0.313	3.35910946536983e-178	ubiquitin conjugating enzyme E2 R2 [Source:HGNC Symbol;Acc:HGNC:19907]
337	ITPRID2	3.40341480316942e-182	0.339083500551699	0.573	0.218	5.36310104683438e-178	ITPR interacting domain containing 2 [Source:HGNC Symbol;Acc:HGNC:11319]
338	WAC	2.02737268700486e-181	0.486678358327208	0.845	0.373	3.19473388018225e-177	WW domain containing adaptor with coiled-coil [Source:HGNC Symbol;Acc:HGNC:17327]
339	GARS1	4.06325828718344e-181	0.457038330101583	0.719	0.31	6.40288240894366e-177	glycyl-tRNA synthetase 1 [Source:HGNC Symbol;Acc:HGNC:4162]
340	SFSWAP	4.3058786781219e-181	0.303935757723916	0.666	0.281	6.78520362098448e-177	splicing factor SWAP [Source:HGNC Symbol;Acc:HGNC:10790]
341	CCSAP	4.52448997027116e-181	0.327608681031059	0.832	0.372	7.12969129515329e-177	centriole, cilia and spindle associated protein [Source:HGNC Symbol;Acc:HGNC:29578]
342	KCTD3	5.10827564393792e-181	0.299727048417223	0.71	0.297	8.04962075971738e-177	potassium channel tetramerization domain containing 3 [Source:HGNC Symbol;Acc:HGNC:21305]
343	CCNG1	6.33435643377037e-181	0.439239183530948	0.921	0.482	9.98167886833535e-177	cyclin G1 [Source:HGNC Symbol;Acc:HGNC:1592]
344	BTG1	1.02970985956839e-180	0.445852674505957	0.931	0.474	1.62261679670787e-176	BTG anti-proliferation factor 1 [Source:HGNC Symbol;Acc:HGNC:1130]
345	CHORDC1	2.10540382397301e-180	0.389634016831216	0.676	0.29	3.31769534581667e-176	cysteine and histidine rich domain containing 1 [Source:HGNC Symbol;Acc:HGNC:14525]
346	TRA2B	2.3582820965891e-180	0.647185741700386	0.928	0.46	3.71618092780511e-176	transformer 2 beta homolog [Source:HGNC Symbol;Acc:HGNC:10781]
347	MTHFD2	3.00119799082408e-180	0.328676004442667	0.82	0.367	4.72928779394059e-176	methylenetetrahydrofolate dehydrogenase (NADP+ dependent) 2, methenyltetrahydrofolate cyclohydrolase [Source:HGNC Symbol;Acc:HGNC:7434]
348	PPP1R15A	4.19472058975294e-180	0.456430324509484	0.478	0.14	6.61004070533269e-176	protein phosphatase 1 regulatory subunit 15A [Source:HGNC Symbol;Acc:HGNC:14375]
349	SEC31A	4.30779713401716e-180	0.331355416938793	0.669	0.284	6.78822672378423e-176	SEC31 homolog A, COPII coat complex component [Source:HGNC Symbol;Acc:HGNC:17052]
350	TMF1	1.60598726130808e-179	0.357545156322911	0.634	0.263	2.53071472636928e-175	TATA element modulatory factor 1 [Source:HGNC Symbol;Acc:HGNC:11870]
351	ASCC3	4.1319604014765e-179	0.269391044047204	0.715	0.318	6.51114320064668e-175	activating signal cointegrator 1 complex subunit 3 [Source:HGNC Symbol;Acc:HGNC:18697]
352	TAF7	4.28952757241675e-179	0.505107822995789	0.896	0.424	6.75943754861432e-175	TATA-box binding protein associated factor 7 [Source:HGNC Symbol;Acc:HGNC:11541]
353	SYPL1	4.79402018357697e-179	0.336345147629323	0.436	0.112	7.55441700528059e-175	synaptophysin like 1 [Source:HGNC Symbol;Acc:HGNC:11507]
354	SMC5	6.11613260162531e-179	0.307092277640005	0.762	0.339	9.63780175364116e-175	structural maintenance of chromosomes 5 [Source:HGNC Symbol;Acc:HGNC:20465]
355	RAB21	2.35640180441365e-178	0.315938137509328	0.622	0.255	3.71321796339502e-174	RAB21, member RAS oncogene family [Source:HGNC Symbol;Acc:HGNC:18263]
356	ATL1	3.21418730359873e-178	0.320392732823258	0.662	0.276	5.06491635301088e-174	atlastin GTPase 1 [Source:HGNC Symbol;Acc:HGNC:11231]
357	VKORC1	9.67767586864635e-178	0.361214148983726	0.866	0.406	1.52500816338129e-173	vitamin K epoxide reductase complex subunit 1 [Source:HGNC Symbol;Acc:HGNC:23663]
358	DCP2	1.54470144905539e-177	0.370198318097977	0.889	0.429	2.43414054342148e-173	decapping mRNA 2 [Source:HGNC Symbol;Acc:HGNC:24452]
359	SLC30A1	1.13153859713585e-176	0.361884288388174	0.463	0.135	1.78307852136667e-172	solute carrier family 30 member 1 [Source:HGNC Symbol;Acc:HGNC:11012]
360	TARS1	1.14666019724555e-176	0.350370370744502	0.686	0.292	1.80690713881954e-172	threonyl-tRNA synthetase 1 [Source:HGNC Symbol;Acc:HGNC:11572]
361	FAM8A1	1.43096964131332e-176	0.329904999337965	0.579	0.227	2.25492196078153e-172	family with sequence similarity 8 member A1 [Source:HGNC Symbol;Acc:HGNC:16372]
362	RAB6A	1.68017354280975e-176	0.308822560375963	0.686	0.294	2.6476174687596e-172	RAB6A, member RAS oncogene family [Source:HGNC Symbol;Acc:HGNC:9786]
363	SQLE	2.35282567866154e-176	0.597992114382709	0.896	0.438	3.70758270443485e-172	squalene epoxidase [Source:HGNC Symbol;Acc:HGNC:11279]
364	NUP93	5.55959813758482e-176	0.311038637551878	0.576	0.224	8.76081474520616e-172	nucleoporin 93 [Source:HGNC Symbol;Acc:HGNC:28958]
365	RAB3A	5.7988121737277e-176	0.252613591113542	0.571	0.209	9.1377682233601e-172	RAB3A, member RAS oncogene family [Source:HGNC Symbol;Acc:HGNC:9777]
366	BUB3	6.1747166295887e-176	0.393958783783156	0.874	0.414	9.73011846490588e-172	BUB3 mitotic checkpoint protein [Source:HGNC Symbol;Acc:HGNC:1151]
367	C12orf29	9.03595886445936e-176	0.270262536363237	0.525	0.186	1.42388639786151e-171	chromosome 12 open reading frame 29 [Source:HGNC Symbol;Acc:HGNC:25322]
368	NSA2	1.31442439232292e-175	0.364703660440936	0.911	0.472	2.07126995742246e-171	NSA2 ribosome biogenesis factor [Source:HGNC Symbol;Acc:HGNC:30728]
369	BPNT2	2.98764400556515e-175	0.315946623120195	0.546	0.205	4.70792942396957e-171	3'(2'), 5'-bisphosphate nucleotidase 2 [Source:HGNC Symbol;Acc:HGNC:26019]
370	INTS6	4.51621510319625e-175	0.353880105238473	0.637	0.263	7.11665175961666e-171	integrator complex subunit 6 [Source:HGNC Symbol;Acc:HGNC:14879]
371	BICD1	6.14271035361492e-175	0.290464847581136	0.762	0.335	9.6796829752264e-171	BICD cargo adaptor 1 [Source:HGNC Symbol;Acc:HGNC:1049]
372	IRF2BP2	6.78747146056939e-175	0.266240511914877	0.653	0.266	1.06956975275652e-170	interferon regulatory factor 2 binding protein 2 [Source:HGNC Symbol;Acc:HGNC:21729]
373	BRD4	8.78213586683148e-175	0.383282774075497	0.844	0.367	1.3838889698953e-170	bromodomain containing 4 [Source:HGNC Symbol;Acc:HGNC:13575]
374	MT-CYB	1.06732769053193e-174	0.835563929867695	0.991	0.702	1.68189497474022e-170	mitochondrially encoded cytochrome b [Source:HGNC Symbol;Acc:HGNC:7427]
375	PCDH10	1.42766086936324e-174	0.350885920592348	0.409	0.083	2.24970799794259e-170	protocadherin 10 [Source:HGNC Symbol;Acc:HGNC:13404]
376	TMBIM6	1.79792861627879e-174	0.367694947208533	0.897	0.427	2.83317591353212e-170	transmembrane BAX inhibitor motif containing 6 [Source:HGNC Symbol;Acc:HGNC:11723]
377	PTP4A2	2.70250650225786e-174	0.333099653266473	0.869	0.382	4.25860974625793e-170	protein tyrosine phosphatase 4A2 [Source:HGNC Symbol;Acc:HGNC:9635]
378	ARL4D	7.52101665760512e-174	0.277199637454871	0.606	0.244	1.18516180490541e-169	ADP ribosylation factor like GTPase 4D [Source:HGNC Symbol;Acc:HGNC:656]
379	RASD1	1.00964802749122e-173	0.330685486434687	0.57	0.218	1.59100336172067e-169	ras related dexamethasone induced 1 [Source:HGNC Symbol;Acc:HGNC:15828]
380	RLIM	1.81498511833046e-173	0.383017514991481	0.633	0.265	2.86005354946514e-169	ring finger protein, LIM domain interacting [Source:HGNC Symbol;Acc:HGNC:13429]
381	PUM1	1.87311202372835e-173	0.405309251353083	0.744	0.324	2.95164992699113e-169	pumilio RNA binding family member 1 [Source:HGNC Symbol;Acc:HGNC:14957]
382	POLR2A	1.06886992324166e-172	0.316575333749417	0.718	0.3	1.68432522504421e-168	RNA polymerase II subunit A [Source:HGNC Symbol;Acc:HGNC:9187]
383	TOPORS	1.23020171675704e-172	0.347104915093887	0.662	0.281	1.93855186526574e-168	TOP1 binding arginine/serine rich protein, E3 ubiquitin ligase [Source:HGNC Symbol;Acc:HGNC:21653]
384	ZBTB11	1.33279234032109e-172	0.371231281879182	0.532	0.195	2.10021416987797e-168	zinc finger and BTB domain containing 11 [Source:HGNC Symbol;Acc:HGNC:16740]
385	NUP58	7.61789261814745e-172	0.336713547431134	0.832	0.384	1.20042751876768e-167	nucleoporin 58 [Source:HGNC Symbol;Acc:HGNC:20261]
386	KLF6	1.29738680363641e-171	0.481558664894038	0.674	0.282	2.04442212517025e-167	Kruppel like factor 6 [Source:HGNC Symbol;Acc:HGNC:2235]
387	PIM1	4.29057789772152e-171	0.288005920376892	0.582	0.236	6.76109265122957e-167	Pim-1 proto-oncogene, serine/threonine kinase [Source:HGNC Symbol;Acc:HGNC:8986]
388	CADM2	3.01001551112528e-170	0.334469372924513	0.727	0.312	4.74318244243122e-166	cell adhesion molecule 2 [Source:HGNC Symbol;Acc:HGNC:29849]
389	DNAJC2	1.0983533297475e-169	0.268822329352996	0.662	0.287	1.73078517701611e-165	DnaJ heat shock protein family (Hsp40) member C2 [Source:HGNC Symbol;Acc:HGNC:13192]
390	UBE2B	2.26778253903213e-169	0.313947491545338	0.905	0.444	3.57357172500683e-165	ubiquitin conjugating enzyme E2 B [Source:HGNC Symbol;Acc:HGNC:12473]
391	PPP1CC	2.81045212854375e-169	0.483473665823453	0.929	0.481	4.42871046415925e-165	protein phosphatase 1 catalytic subunit gamma [Source:HGNC Symbol;Acc:HGNC:9283]
392	H2AC11	3.28211265874637e-169	-2.15425249442254	0.413	0.642	5.17195312765252e-165	H2A clustered histone 11 [Source:HGNC Symbol;Acc:HGNC:4737]
393	MTRNR2L8	3.384991615918e-169	-2.20085676945115	0.995	0.912	5.33406978836359e-165	MT-RNR2 like 8 [Source:HGNC Symbol;Acc:HGNC:37165]
394	ASNS	3.71942451391065e-169	0.331221126901797	0.593	0.231	5.86106914902041e-165	asparagine synthetase (glutamine-hydrolyzing) [Source:HGNC Symbol;Acc:HGNC:753]
395	CHD1	8.78101393681552e-169	0.393734741727704	0.762	0.339	1.38371217616339e-164	chromodomain helicase DNA binding protein 1 [Source:HGNC Symbol;Acc:HGNC:1915]
396	ZBTB43	2.78045443228891e-168	0.403682842030686	0.561	0.218	4.38144009440086e-164	zinc finger and BTB domain containing 43 [Source:HGNC Symbol;Acc:HGNC:17908]
397	PCMTD1	2.33626629166869e-167	0.290224903450586	0.628	0.267	3.68148842241153e-163	protein-L-isoaspartate (D-aspartate) O-methyltransferase domain containing 1 [Source:HGNC Symbol;Acc:HGNC:30483]
398	C12orf57	3.54604614188219e-167	0.334952787888411	0.899	0.493	5.58785951037796e-163	chromosome 12 open reading frame 57 [Source:HGNC Symbol;Acc:HGNC:29521]
399	PRRC1	5.118266040515e-167	0.303435157579673	0.565	0.224	8.06536362664353e-163	proline rich coiled-coil 1 [Source:HGNC Symbol;Acc:HGNC:28164]
400	MBIP	1.16453688364828e-166	0.25556589627079	0.573	0.232	1.83507722125296e-162	MAP3K12 binding inhibitory protein 1 [Source:HGNC Symbol;Acc:HGNC:20427]
401	CRKL	8.47499928907038e-166	0.390104030110093	0.547	0.214	1.33549038797171e-161	CRK like proto-oncogene, adaptor protein [Source:HGNC Symbol;Acc:HGNC:2363]
402	AK4	1.52796103181467e-165	0.275424820645062	0.762	0.332	2.40776099393356e-161	adenylate kinase 4 [Source:HGNC Symbol;Acc:HGNC:363]
403	ARL5B	1.53570319193156e-164	0.282933070446641	0.625	0.269	2.41996108984576e-160	ADP ribosylation factor like GTPase 5B [Source:HGNC Symbol;Acc:HGNC:23052]
404	DIS3	1.57950967152089e-164	0.305372840227308	0.631	0.267	2.48899134038262e-160	DIS3 homolog, exosome endoribonuclease and 3'-5' exoribonuclease [Source:HGNC Symbol;Acc:HGNC:20604]
405	PHIP	2.6436496009571e-164	0.479724202859959	0.828	0.383	4.16586304118821e-160	pleckstrin homology domain interacting protein [Source:HGNC Symbol;Acc:HGNC:15673]
406	NAA25	2.94393199856192e-164	0.350587050151478	0.644	0.28	4.63904804333387e-160	N-alpha-acetyltransferase 25, NatB auxiliary subunit [Source:HGNC Symbol;Acc:HGNC:25783]
407	F12	3.3131536163767e-164	0.263447869998284	0.363	0.064	5.22086746868641e-160	coagulation factor XII [Source:HGNC Symbol;Acc:HGNC:3530]
408	UBXN7	4.7011599407075e-164	0.344302856919698	0.722	0.316	7.40808783456689e-160	UBX domain protein 7 [Source:HGNC Symbol;Acc:HGNC:29119]
409	ZBTB10	2.2685707386055e-163	0.439586971780094	0.582	0.24	3.57481376989455e-159	zinc finger and BTB domain containing 10 [Source:HGNC Symbol;Acc:HGNC:30953]
410	GNL2	5.05105376500817e-163	0.250964457300568	0.593	0.243	7.95945052289987e-159	G protein nucleolar 2 [Source:HGNC Symbol;Acc:HGNC:29925]
411	COMMD6	1.41030279863873e-162	0.304239013767182	0.884	0.457	2.2223551500949e-158	COMM domain containing 6 [Source:HGNC Symbol;Acc:HGNC:24015]
412	KLHL28	2.09481442278216e-162	0.335157314980602	0.47	0.155	3.30100856742012e-158	kelch like family member 28 [Source:HGNC Symbol;Acc:HGNC:19741]
413	MT-ND4	2.60078243411765e-162	0.688160642519904	0.998	0.84	4.09831295968259e-158	mitochondrially encoded NADH:ubiquinone oxidoreductase core subunit 4 [Source:HGNC Symbol;Acc:HGNC:7459]
414	BAZ1B	2.73718064062285e-162	0.399146493189644	0.86	0.383	4.31324925349348e-158	bromodomain adjacent to zinc finger domain 1B [Source:HGNC Symbol;Acc:HGNC:961]
415	MAFG	3.8965159137691e-162	0.436175087481281	0.5	0.183	6.14012977691736e-158	MAF bZIP transcription factor G [Source:HGNC Symbol;Acc:HGNC:6781]
416	HMGCS1	4.28660156770219e-162	0.664448165366793	0.835	0.418	6.75482675038511e-158	3-hydroxy-3-methylglutaryl-CoA synthase 1 [Source:HGNC Symbol;Acc:HGNC:5007]
417	CSNK2A1	7.6709164011034e-162	0.264382175706918	0.861	0.394	1.20878300648587e-157	casein kinase 2 alpha 1 [Source:HGNC Symbol;Acc:HGNC:2457]
418	BAZ2A	7.77781727321678e-162	0.269788216546366	0.688	0.291	1.2256284459135e-157	bromodomain adjacent to zinc finger domain 2A [Source:HGNC Symbol;Acc:HGNC:962]
419	DIPK2A	1.00873111721308e-161	0.332306864012393	0.581	0.243	1.58955849450437e-157	divergent protein kinase domain 2A [Source:HGNC Symbol;Acc:HGNC:28490]
420	EIF1B	2.89084872594271e-161	0.334983138830802	0.914	0.505	4.55539942234052e-157	eukaryotic translation initiation factor 1B [Source:HGNC Symbol;Acc:HGNC:30792]
421	RNF145	3.81905582461294e-161	0.260180313448122	0.739	0.328	6.01806816842506e-157	ring finger protein 145 [Source:HGNC Symbol;Acc:HGNC:20853]
422	KTN1	7.44521292055612e-161	0.352420114054031	0.905	0.429	1.17321665202123e-156	kinectin 1 [Source:HGNC Symbol;Acc:HGNC:6467]
423	PRRC2C	8.34664238855397e-161	0.666072297994993	0.97	0.491	1.31526390758833e-156	proline rich coiled-coil 2C [Source:HGNC Symbol;Acc:HGNC:24903]
424	ATF7IP	9.68873017316958e-161	0.273788807459871	0.651	0.285	1.52675010068806e-156	activating transcription factor 7 interacting protein [Source:HGNC Symbol;Acc:HGNC:20092]
425	SRPRA	1.15111424760631e-160	0.35398227010376	0.551	0.223	1.81392583137802e-156	SRP receptor subunit alpha [Source:HGNC Symbol;Acc:HGNC:11307]
426	GOLGA2	2.67386596229306e-160	0.406139050012838	0.639	0.282	4.21347798338141e-156	golgin A2 [Source:HGNC Symbol;Acc:HGNC:4425]
427	SCARB2	3.67769275333223e-160	0.346588723089566	0.888	0.411	5.79530824070093e-156	scavenger receptor class B member 2 [Source:HGNC Symbol;Acc:HGNC:1665]
428	RICTOR	4.30506946850498e-160	0.423200424175649	0.606	0.257	6.78392846847015e-156	RPTOR independent companion of MTOR complex 2 [Source:HGNC Symbol;Acc:HGNC:28611]
429	C11orf96	4.72575585452844e-160	0.365151530219347	0.403	0.102	7.44684607556592e-156	chromosome 11 open reading frame 96 [Source:HGNC Symbol;Acc:HGNC:38675]
430	RBPJ	5.79865369229082e-160	0.40246084087807	0.893	0.424	9.13751848831187e-156	recombination signal binding protein for immunoglobulin kappa J region [Source:HGNC Symbol;Acc:HGNC:5724]
431	GPI	6.62168273073681e-160	0.456583290365489	0.881	0.413	1.04344476470951e-155	glucose-6-phosphate isomerase [Source:HGNC Symbol;Acc:HGNC:4458]
432	C6orf136	1.13089587517792e-159	0.261657358568809	0.52	0.197	1.78206572010537e-155	chromosome 6 open reading frame 136 [Source:HGNC Symbol;Acc:HGNC:21301]
433	DARS1	1.70855652632529e-159	0.429486378706228	0.857	0.401	2.69234337418339e-155	aspartyl-tRNA synthetase 1 [Source:HGNC Symbol;Acc:HGNC:2678]
434	DYNLL2	1.90952375259493e-159	0.263473995563332	0.626	0.271	3.00902752933908e-155	dynein light chain LC8-type 2 [Source:HGNC Symbol;Acc:HGNC:24596]
435	CXCR4	2.65962551447124e-159	0.314151231001038	0.776	0.355	4.19103788570378e-155	C-X-C motif chemokine receptor 4 [Source:HGNC Symbol;Acc:HGNC:2561]
436	BBX	4.78213100820434e-159	0.307811289234994	0.615	0.258	7.5356820427284e-155	BBX high mobility group box domain containing [Source:HGNC Symbol;Acc:HGNC:14422]
437	EIF3F	8.13620928631081e-159	0.441839401869424	0.925	0.5	1.28210385933686e-154	eukaryotic translation initiation factor 3 subunit F [Source:HGNC Symbol;Acc:HGNC:3275]
438	LMNA	2.95963525542437e-158	0.296079970012592	0.569	0.22	4.66379323549773e-154	lamin A/C [Source:HGNC Symbol;Acc:HGNC:6636]
439	RSRP1	3.5015477712169e-158	0.321542052990222	0.635	0.28	5.5177389778836e-154	arginine and serine rich protein 1 [Source:HGNC Symbol;Acc:HGNC:25234]
440	ASH1L	8.51467112992114e-158	0.446596711057252	0.818	0.377	1.34174187665297e-153	ASH1 like histone lysine methyltransferase [Source:HGNC Symbol;Acc:HGNC:19088]
441	EBP	8.92177349006479e-158	0.258199868405001	0.841	0.403	1.40589306656441e-153	EBP cholestenol delta-isomerase [Source:HGNC Symbol;Acc:HGNC:3133]
442	USP15	1.52406376250471e-157	0.269884349304207	0.613	0.265	2.40161967695492e-153	ubiquitin specific peptidase 15 [Source:HGNC Symbol;Acc:HGNC:12613]
443	THAP1	1.97443576199522e-157	0.282036278336959	0.429	0.126	3.11131587375206e-153	THAP domain containing 1 [Source:HGNC Symbol;Acc:HGNC:20856]
444	ZNF451	2.659961412632e-157	0.374190881527729	0.898	0.426	4.1915671940255e-153	zinc finger protein 451 [Source:HGNC Symbol;Acc:HGNC:21091]
445	CCDC186	2.865444461686e-157	0.253324001915677	0.506	0.184	4.51536738272479e-153	coiled-coil domain containing 186 [Source:HGNC Symbol;Acc:HGNC:24349]
446	ELF2	5.56295728500268e-157	0.258444871783858	0.662	0.291	8.76610808970722e-153	E74 like ETS transcription factor 2 [Source:HGNC Symbol;Acc:HGNC:3317]
447	TECR	3.70177550863731e-156	0.736755390863795	0.932	0.474	5.83325784651067e-152	trans-2,3-enoyl-CoA reductase [Source:HGNC Symbol;Acc:HGNC:4551]
448	CYCS	5.62948089618106e-156	0.321095637023926	0.915	0.473	8.87093599620212e-152	cytochrome c, somatic [Source:HGNC Symbol;Acc:HGNC:19986]
449	RPL22L1	6.01959223599039e-156	0.310685679427404	0.795	0.38	9.48567344547366e-152	ribosomal protein L22 like 1 [Source:HGNC Symbol;Acc:HGNC:27610]
450	BDP1	9.46604850153786e-156	0.371642868295674	0.796	0.366	1.49165992287234e-151	B double prime 1, subunit of RNA polymerase III transcription initiation factor IIIB [Source:HGNC Symbol;Acc:HGNC:13652]
451	G3BP1	1.0988089875806e-155	0.524678796863655	0.891	0.42	1.73150320262952e-151	G3BP stress granule assembly factor 1 [Source:HGNC Symbol;Acc:HGNC:30292]
452	ZEB1	1.1322588954542e-155	0.268641315694175	0.764	0.348	1.78421356745673e-151	zinc finger E-box binding homeobox 1 [Source:HGNC Symbol;Acc:HGNC:11642]
453	NACA	2.66530035723824e-155	0.496563767113412	0.968	0.841	4.19998030293602e-151	nascent polypeptide associated complex subunit alpha [Source:HGNC Symbol;Acc:HGNC:7629]
454	EIF3A	2.85787086781224e-155	0.501917548032769	0.938	0.444	4.50343291349853e-151	eukaryotic translation initiation factor 3 subunit A [Source:HGNC Symbol;Acc:HGNC:3271]
455	PAFAH1B1	9.41939054819611e-155	0.301278523053802	0.82	0.384	1.48430756258474e-150	platelet activating factor acetylhydrolase 1b regulatory subunit 1 [Source:HGNC Symbol;Acc:HGNC:8574]
456	HSPH1	9.59368696995351e-155	1.00657837536644	0.658	0.292	1.51177319272527e-150	heat shock protein family H (Hsp110) member 1 [Source:HGNC Symbol;Acc:HGNC:16969]
457	SSR1	1.97369596190554e-154	0.273340000210653	0.879	0.408	3.11015009677074e-150	signal sequence receptor subunit 1 [Source:HGNC Symbol;Acc:HGNC:11323]
458	DDX3Y	2.26139774032326e-154	0.610958296537266	0.522	0.206	3.5635105592014e-150	DEAD-box helicase 3 Y-linked [Source:HGNC Symbol;Acc:HGNC:2699]
459	SLC2A3	1.0581665860063e-153	0.439596153513627	0.47	0.165	1.66745890622873e-149	solute carrier family 2 member 3 [Source:HGNC Symbol;Acc:HGNC:11007]
460	PAXBP1	1.31658871515906e-153	0.356891739893227	0.748	0.358	2.07468049734765e-149	PAX3 and PAX7 binding protein 1 [Source:HGNC Symbol;Acc:HGNC:13579]
461	SPAG9	1.45940087402275e-153	0.316274323023012	0.776	0.36	2.29972389728505e-149	sperm associated antigen 9 [Source:HGNC Symbol;Acc:HGNC:14524]
462	RRAGD	2.83941552901639e-153	0.257773498342964	0.495	0.189	4.47435099062402e-149	Ras related GTP binding D [Source:HGNC Symbol;Acc:HGNC:19903]
463	ZFPL1	5.62365828633569e-153	0.276046760336603	0.506	0.199	8.86176072760778e-149	zinc finger protein like 1 [Source:HGNC Symbol;Acc:HGNC:12868]
464	FBXL3	6.39780422446593e-153	0.389084620817166	0.459	0.16	1.00816598969134e-148	F-box and leucine rich repeat protein 3 [Source:HGNC Symbol;Acc:HGNC:13599]
465	FAM53C	2.76641019823183e-152	0.272713468442475	0.55	0.219	4.35930919037372e-148	family with sequence similarity 53 member C [Source:HGNC Symbol;Acc:HGNC:1336]
466	SLC20A1	1.82991158856126e-151	0.354068959904513	0.724	0.324	2.88357468125484e-147	solute carrier family 20 member 1 [Source:HGNC Symbol;Acc:HGNC:10946]
467	TMEM170A	3.52119149801898e-151	0.276390648588397	0.543	0.222	5.54869356257831e-147	transmembrane protein 170A [Source:HGNC Symbol;Acc:HGNC:29577]
468	GPX1	3.75576851088478e-151	0.373574932949113	0.893	0.461	5.91834001945224e-147	glutathione peroxidase 1 [Source:HGNC Symbol;Acc:HGNC:4553]
469	RSF1	6.01226963367566e-151	0.261626818333947	0.805	0.363	9.47413448874611e-147	remodeling and spacing factor 1 [Source:HGNC Symbol;Acc:HGNC:18118]
470	XIAP	1.55900673266383e-150	0.293842439489072	0.56	0.234	2.45668280933167e-146	X-linked inhibitor of apoptosis [Source:HGNC Symbol;Acc:HGNC:592]
471	AKAP17A	2.50605330574684e-150	0.285815436577834	0.493	0.187	3.94903879919586e-146	A-kinase anchoring protein 17A [Source:HGNC Symbol;Acc:HGNC:18783]
472	ZNF143	2.72711988642974e-150	0.294135992082793	0.511	0.2	4.29739551703598e-146	zinc finger protein 143 [Source:HGNC Symbol;Acc:HGNC:12928]
473	NECTIN3	3.33180102762268e-150	0.298948841962322	0.491	0.187	5.25025205932781e-146	nectin cell adhesion molecule 3 [Source:HGNC Symbol;Acc:HGNC:17664]
474	RPL39	3.15740300601683e-149	0.39109224670366	0.972	0.939	4.97543565688132e-145	ribosomal protein L39 [Source:HGNC Symbol;Acc:HGNC:10350]
475	SEPTIN7	3.07422646551063e-148	0.380196273578105	0.932	0.49	4.84436606435165e-144	septin 7 [Source:HGNC Symbol;Acc:HGNC:1717]
476	CRY1	4.29721543119477e-148	0.281331093695183	0.516	0.204	6.77155207647673e-144	cryptochrome circadian regulator 1 [Source:HGNC Symbol;Acc:HGNC:2384]
477	AKAP9	5.01021596121119e-148	0.460260554267181	0.907	0.422	7.8950983116766e-144	A-kinase anchoring protein 9 [Source:HGNC Symbol;Acc:HGNC:379]
478	CELF1	5.33531300611123e-148	0.53671867859208	0.8	0.354	8.40738623503008e-144	CUGBP Elav-like family member 1 [Source:HGNC Symbol;Acc:HGNC:2549]
479	CNOT4	5.54793934403119e-148	0.266492904912905	0.634	0.285	8.74244281832435e-144	CCR4-NOT transcription complex subunit 4 [Source:HGNC Symbol;Acc:HGNC:7880]
480	PDIA6	1.70073000267586e-147	0.312738937266696	0.907	0.461	2.68001033821662e-143	protein disulfide isomerase family A member 6 [Source:HGNC Symbol;Acc:HGNC:30168]
481	PTPRK	4.77844413063879e-147	0.325267763979813	0.442	0.144	7.52987226106061e-143	protein tyrosine phosphatase receptor type K [Source:HGNC Symbol;Acc:HGNC:9674]
482	RPL14	1.27373537774191e-146	0.43217976724646	0.983	0.921	2.00715220824571e-142	ribosomal protein L14 [Source:HGNC Symbol;Acc:HGNC:10305]
483	ATXN2L	7.08529947634646e-146	0.282445958389257	0.692	0.303	1.11650149148267e-141	ataxin 2 like [Source:HGNC Symbol;Acc:HGNC:31326]
484	PLEKHB2	7.37624767167758e-146	0.343063639262801	0.508	0.201	1.16234910810295e-141	pleckstrin homology domain containing B2 [Source:HGNC Symbol;Acc:HGNC:19236]
485	FOXO3	9.61891869574666e-146	0.313140637919231	0.6	0.258	1.51574920807576e-141	forkhead box O3 [Source:HGNC Symbol;Acc:HGNC:3821]
486	MVD	1.12288997651464e-145	0.28171693796699	0.556	0.234	1.76945002499178e-141	mevalonate diphosphate decarboxylase [Source:HGNC Symbol;Acc:HGNC:7529]
487	USP1	2.92310894846346e-144	0.275050941539336	0.865	0.42	4.60623508098871e-140	ubiquitin specific peptidase 1 [Source:HGNC Symbol;Acc:HGNC:12607]
488	RLF	1.24294292382706e-143	0.329978504402904	0.615	0.275	1.95862945936668e-139	RLF zinc finger [Source:HGNC Symbol;Acc:HGNC:10025]
489	RAD23A	1.62064002442043e-143	0.289116947570971	0.866	0.413	2.55380455048171e-139	RAD23 homolog A, nucleotide excision repair protein [Source:HGNC Symbol;Acc:HGNC:9812]
490	SBNO1	2.37423240875104e-143	0.28770312920769	0.686	0.306	3.74131542970988e-139	strawberry notch homolog 1 [Source:HGNC Symbol;Acc:HGNC:22973]
491	MTRNR2L12	4.11234809950799e-143	-2.31901580711248	0.979	0.84	6.4802381352047e-139	MT-RNR2 like 12 [Source:HGNC Symbol;Acc:HGNC:37169]
492	RHOA	4.95868132148362e-143	0.326686986748798	0.931	0.489	7.81389002639389e-139	ras homolog family member A [Source:HGNC Symbol;Acc:HGNC:667]
493	ZMYM2	6.68319102591151e-143	0.333090367956944	0.768	0.355	1.05313724186314e-138	zinc finger MYM-type containing 2 [Source:HGNC Symbol;Acc:HGNC:12989]
494	ZHX1	3.47091326843905e-142	0.282710165262431	0.667	0.299	5.46946512840626e-138	zinc fingers and homeoboxes 1 [Source:HGNC Symbol;Acc:HGNC:12871]
495	MEX3B	2.39217342911133e-141	0.296234056757313	0.497	0.199	3.76958688959364e-137	mex-3 RNA binding family member B [Source:HGNC Symbol;Acc:HGNC:25297]
496	SMC3	1.04288286433985e-140	0.397156538935983	0.929	0.481	1.64337481762673e-136	structural maintenance of chromosomes 3 [Source:HGNC Symbol;Acc:HGNC:2468]
497	HNRNPC	1.1145728149359e-140	0.568894128388385	0.965	0.581	1.75634384177599e-136	heterogeneous nuclear ribonucleoprotein C [Source:HGNC Symbol;Acc:HGNC:5035]
498	KPNB1	1.42467986018801e-139	0.380276092034698	0.929	0.437	2.24501052368426e-135	karyopherin subunit beta 1 [Source:HGNC Symbol;Acc:HGNC:6400]
499	ATF3	1.78374529783654e-139	0.300654561614077	0.373	0.089	2.81082584033082e-135	activating transcription factor 3 [Source:HGNC Symbol;Acc:HGNC:785]
500	RPL32	3.3232820310667e-138	0.390950374064106	0.985	0.975	5.2368278245549e-134	ribosomal protein L32 [Source:HGNC Symbol;Acc:HGNC:10336]
501	NRIP1	1.02033996979354e-137	0.330473912747503	0.63	0.286	1.60785172440067e-133	nuclear receptor interacting protein 1 [Source:HGNC Symbol;Acc:HGNC:8001]
502	ARHGAP5	2.90391826977699e-137	0.327311910591934	0.673	0.319	4.57599440951458e-133	Rho GTPase activating protein 5 [Source:HGNC Symbol;Acc:HGNC:675]
503	ZNF207	5.53736841236002e-137	0.355955212049364	0.839	0.394	8.72578514419692e-133	zinc finger protein 207 [Source:HGNC Symbol;Acc:HGNC:12998]
504	FEM1B	5.83838567865686e-137	0.280042459935563	0.559	0.243	9.20012815242748e-133	fem-1 homolog B [Source:HGNC Symbol;Acc:HGNC:3649]
505	EIF4B	8.8598332513199e-137	0.322940002222433	0.935	0.502	1.39613252374299e-132	eukaryotic translation initiation factor 4B [Source:HGNC Symbol;Acc:HGNC:3285]
506	RTN3	2.17366987174341e-136	0.292940175938126	0.943	0.497	3.42526898389326e-132	reticulon 3 [Source:HGNC Symbol;Acc:HGNC:10469]
507	KHDC4	3.73194835567518e-136	0.257755454256296	0.663	0.303	5.88080421887295e-132	KH domain containing 4, pre-mRNA splicing factor [Source:HGNC Symbol;Acc:HGNC:29145]
508	DGKE	4.18350348103794e-136	0.283465728136452	0.454	0.17	6.59236478541958e-132	diacylglycerol kinase epsilon [Source:HGNC Symbol;Acc:HGNC:2852]
509	ATP13A3	7.4511037269828e-136	0.42562986735334	0.587	0.265	1.17414492529795e-131	ATPase 13A3 [Source:HGNC Symbol;Acc:HGNC:24113]
510	NR1D1	8.29318304626927e-136	0.259621229770523	0.332	0.07	1.30683978443111e-131	nuclear receptor subfamily 1 group D member 1 [Source:HGNC Symbol;Acc:HGNC:7962]
511	GNA13	1.12366654354914e-135	0.263673602392145	0.49	0.198	1.77067373932473e-131	G protein subunit alpha 13 [Source:HGNC Symbol;Acc:HGNC:4381]
512	FAR1	1.46366511733783e-135	0.303388697499528	0.621	0.291	2.30644349190095e-131	fatty acyl-CoA reductase 1 [Source:HGNC Symbol;Acc:HGNC:26222]
513	FBXO7	2.94058805008185e-135	0.264443791011394	0.492	0.201	4.63377864931898e-131	F-box protein 7 [Source:HGNC Symbol;Acc:HGNC:13586]
514	RPL5	3.72847330475016e-135	0.460814337050492	0.984	0.928	5.87532823362531e-131	ribosomal protein L5 [Source:HGNC Symbol;Acc:HGNC:10360]
515	HELZ	5.46597977393953e-135	0.296842943595023	0.653	0.295	8.61329092777391e-131	helicase with zinc finger [Source:HGNC Symbol;Acc:HGNC:16878]
516	RPS24	8.95468884215836e-135	0.366117049279255	0.987	0.966	1.41107986774731e-130	ribosomal protein S24 [Source:HGNC Symbol;Acc:HGNC:10411]
517	UBE2D3	1.08406081315007e-134	0.258692825102612	0.931	0.471	1.70826302936187e-130	ubiquitin conjugating enzyme E2 D3 [Source:HGNC Symbol;Acc:HGNC:12476]
518	RPL8	1.09302948529309e-134	0.396906614845572	0.97	0.891	1.72239586292485e-130	ribosomal protein L8 [Source:HGNC Symbol;Acc:HGNC:10368]
519	TPT1	2.32058441593963e-134	0.417365193396806	0.973	0.869	3.65677692263766e-130	tumor protein, translationally-controlled 1 [Source:HGNC Symbol;Acc:HGNC:12022]
520	PDLIM1	5.61013249765389e-134	0.332154788348991	0.883	0.446	8.840446789803e-130	PDZ and LIM domain 1 [Source:HGNC Symbol;Acc:HGNC:2067]
521	SETD5	9.91447407587357e-134	0.272646068019159	0.784	0.361	1.56232282487616e-129	SET domain containing 5 [Source:HGNC Symbol;Acc:HGNC:25566]
522	ELK4	5.13723344766903e-133	0.377533046808191	0.467	0.181	8.09525246683686e-129	ETS transcription factor ELK4 [Source:HGNC Symbol;Acc:HGNC:3326]
523	RAB18	9.65099117474123e-133	0.302024392192422	0.513	0.216	1.52080318931572e-128	RAB18, member RAS oncogene family [Source:HGNC Symbol;Acc:HGNC:14244]
524	RYBP	3.57425889201895e-132	0.253703717647324	0.584	0.263	5.63231716204346e-128	RING1 and YY1 binding protein [Source:HGNC Symbol;Acc:HGNC:10480]
525	RYBP	3.57425889201895e-132	0.253703717647324	0.584	0.263	5.63231716204346e-128	RING1 and YY1 binding protein [Source:NCBI gene (formerly Entrezgene);Acc:23429]
526	COX7A2L	1.05582112359543e-131	0.339261491333307	0.907	0.518	1.66376292656168e-127	cytochrome c oxidase subunit 7A2 like [Source:HGNC Symbol;Acc:HGNC:2289]
527	MORC3	1.42526823804186e-131	0.275841550956532	0.478	0.192	2.24593768950636e-127	MORC family CW-type zinc finger 3 [Source:HGNC Symbol;Acc:HGNC:23572]
528	MT-ND2	1.90723799483924e-131	0.602802420234425	0.992	0.708	3.00542563226767e-127	mitochondrially encoded NADH:ubiquinone oxidoreductase core subunit 2 [Source:HGNC Symbol;Acc:HGNC:7456]
529	TSC22D2	3.0623206240271e-130	0.335194098900491	0.441	0.168	4.8256048393419e-126	TSC22 domain family member 2 [Source:HGNC Symbol;Acc:HGNC:29095]
530	KIF5B	5.07027685766086e-130	0.309061223142699	0.914	0.454	7.98974227230198e-126	kinesin family member 5B [Source:HGNC Symbol;Acc:HGNC:6324]
531	MYLIP	8.4849456039936e-130	0.308081264357248	0.376	0.109	1.33705772827731e-125	myosin regulatory light chain interacting protein [Source:HGNC Symbol;Acc:HGNC:21155]
532	RPL9	4.96003846278632e-129	0.364674884748868	0.977	0.934	7.81602860965868e-125	ribosomal protein L9 [Source:HGNC Symbol;Acc:HGNC:10369]
533	BTF3	4.4395454928963e-128	0.457607015020298	0.947	0.698	6.99583578770599e-124	basic transcription factor 3 [Source:HGNC Symbol;Acc:HGNC:1125]
534	SRSF1	4.92117078953206e-128	0.264172259031761	0.783	0.364	7.75478093014463e-124	serine and arginine rich splicing factor 1 [Source:HGNC Symbol;Acc:HGNC:10780]
535	ELOA	3.14042215478224e-127	0.294143982593335	0.472	0.195	4.94867723150585e-123	elongin A [Source:HGNC Symbol;Acc:HGNC:11620]
536	CANX	8.48509048953519e-127	0.315198870106289	0.915	0.468	1.33708055934096e-122	calnexin [Source:HGNC Symbol;Acc:HGNC:1473]
537	JMY	8.70722990968896e-127	0.308216857388268	0.483	0.202	1.37208528916879e-122	junction mediating and regulatory protein, p53 cofactor [Source:HGNC Symbol;Acc:HGNC:28916]
538	ST13	9.11947976073197e-127	0.310587535036944	0.921	0.503	1.43704762069614e-122	ST13 Hsp70 interacting protein [Source:HGNC Symbol;Acc:HGNC:11343]
539	ELP1	3.4149646354644e-126	0.339083811104067	0.601	0.276	5.3813012725648e-122	elongator complex protein 1 [Source:HGNC Symbol;Acc:HGNC:5959]
540	NPEPPS	1.06526875310403e-125	0.253637346928412	0.776	0.362	1.67865050114134e-121	aminopeptidase puromycin sensitive [Source:HGNC Symbol;Acc:HGNC:7900]
541	UBR5	2.56958170467714e-125	0.346792871172685	0.628	0.29	4.04914685023023e-121	ubiquitin protein ligase E3 component n-recognin 5 [Source:HGNC Symbol;Acc:HGNC:16806]
542	NAA16	2.17144636597535e-124	0.254447522945846	0.508	0.221	3.42176518350396e-120	N-alpha-acetyltransferase 16, NatA auxiliary subunit [Source:HGNC Symbol;Acc:HGNC:26164]
543	PTMS	1.19830366752533e-123	-0.765462551095654	0.945	0.832	1.88828691928641e-119	parathymosin [Source:HGNC Symbol;Acc:HGNC:9629]
544	MATR3.1	3.77850184420728e-123	0.449349221584797	0.569	0.264	5.95416320610183e-119	NA
545	ZNF281	4.11073342212752e-123	0.250798309478875	0.616	0.281	6.47769372658855e-119	zinc finger protein 281 [Source:HGNC Symbol;Acc:HGNC:13075]
546	SGK1	1.0312401350442e-122	0.257867557948538	0.42	0.147	1.62502820480265e-118	serum/glucocorticoid regulated kinase 1 [Source:HGNC Symbol;Acc:HGNC:10810]
547	MSH6	2.53926541968583e-122	0.32145551382746	0.902	0.467	4.00137444834093e-118	mutS homolog 6 [Source:HGNC Symbol;Acc:HGNC:7329]
548	SIN3A	2.7131346541932e-122	0.274404808346493	0.553	0.248	4.27535758807764e-118	SIN3 transcription regulator family member A [Source:HGNC Symbol;Acc:HGNC:19353]
549	PPM1D	3.09273194940586e-122	0.261568801562405	0.492	0.213	4.87352700587375e-118	protein phosphatase, Mg2+/Mn2+ dependent 1D [Source:HGNC Symbol;Acc:HGNC:9277]
550	NAP1L1	7.71895207380993e-122	0.47257428565614	0.977	0.726	1.21635246779097e-117	nucleosome assembly protein 1 like 1 [Source:HGNC Symbol;Acc:HGNC:7637]
551	MSL2	9.11725640690535e-122	0.417458554056402	0.439	0.174	1.43669726460015e-117	MSL complex subunit 2 [Source:HGNC Symbol;Acc:HGNC:25544]
552	EIF3B	1.07977008534232e-120	0.268029243992966	0.697	0.331	1.70150170048243e-116	eukaryotic translation initiation factor 3 subunit B [Source:HGNC Symbol;Acc:HGNC:3280]
553	PRKAB2	2.14054684393817e-120	0.25954613729912	0.465	0.195	3.37307371667777e-116	protein kinase AMP-activated non-catalytic subunit beta 2 [Source:HGNC Symbol;Acc:HGNC:9379]
554	UBA6	2.48315191813659e-120	0.260071403141031	0.623	0.3	3.91295079259964e-116	ubiquitin like modifier activating enzyme 6 [Source:HGNC Symbol;Acc:HGNC:25581]
555	CEP350	7.94675211089578e-120	0.252218039035165	0.747	0.363	1.25224919763496e-115	centrosomal protein 350 [Source:HGNC Symbol;Acc:HGNC:24238]
556	PABPN1	9.36423332916946e-120	0.278259825147789	0.53	0.231	1.47561588801052e-115	poly(A) binding protein nuclear 1 [Source:HGNC Symbol;Acc:HGNC:8565]
557	MED13	3.39469823452781e-119	0.255067205707471	0.606	0.284	5.34936547796892e-115	mediator complex subunit 13 [Source:HGNC Symbol;Acc:HGNC:22474]
558	CACYBP	3.95868487636663e-118	0.36586220989312	0.927	0.514	6.23809562817853e-114	calcyclin binding protein [Source:HGNC Symbol;Acc:HGNC:30423]
559	PCBP2	4.1247776393354e-118	0.501721340272364	0.958	0.526	6.49982460406473e-114	poly(rC) binding protein 2 [Source:HGNC Symbol;Acc:HGNC:8648]
560	KLHL15	4.4833907318888e-118	0.295969139825827	0.421	0.158	7.06492711531037e-114	kelch like family member 15 [Source:HGNC Symbol;Acc:HGNC:29347]
561	CIART	1.22118858435945e-117	0.346569050451106	0.354	0.108	1.92434897123361e-113	circadian associated repressor of transcription [Source:HGNC Symbol;Acc:HGNC:25200]
562	BTBD7	1.64889441296414e-117	0.356655871525929	0.563	0.258	2.59832781594888e-113	BTB domain containing 7 [Source:HGNC Symbol;Acc:HGNC:18269]
563	EIF3E	2.30147349956373e-117	0.425516345874625	0.961	0.608	3.62666194061253e-113	eukaryotic translation initiation factor 3 subunit E [Source:HGNC Symbol;Acc:HGNC:3277]
564	DUSP8	3.04393082310176e-117	0.2515377992165	0.399	0.14	4.79662619104376e-113	dual specificity phosphatase 8 [Source:HGNC Symbol;Acc:HGNC:3074]
565	SRSF10	3.83355509526688e-117	0.362098924904518	0.942	0.499	6.04091611912155e-113	serine and arginine rich splicing factor 10 [Source:HGNC Symbol;Acc:HGNC:16713]
566	SLC5A3	2.37215664493828e-116	0.392966790270464	0.548	0.254	3.73804444109374e-112	solute carrier family 5 member 3 [Source:HGNC Symbol;Acc:HGNC:11038]
567	TFF1	2.5493333623205e-115	-0.717045420318127	0.923	0.87	4.01723951234464e-111	trefoil factor 1 [Source:HGNC Symbol;Acc:HGNC:11755]
568	LDLR	2.69633426051873e-115	0.359558094189325	0.623	0.301	4.24888352772542e-111	low density lipoprotein receptor [Source:HGNC Symbol;Acc:HGNC:6547]
569	AHCTF1	4.37767148267353e-115	0.341639698544844	0.642	0.31	6.89833472239695e-111	AT-hook containing transcription factor 1 [Source:HGNC Symbol;Acc:HGNC:24618]
570	MMS22L	4.91171264877943e-115	0.33866798096229	0.641	0.31	7.73987679194662e-111	MMS22 like, DNA repair protein [Source:HGNC Symbol;Acc:HGNC:21475]
571	ZNF292	2.34266586948681e-114	0.350503472619505	0.869	0.42	3.69157287713731e-110	zinc finger protein 292 [Source:HGNC Symbol;Acc:HGNC:18410]
572	SCD	3.63798958895213e-114	0.364671615159729	0.907	0.461	5.73274399427077e-110	stearoyl-CoA desaturase [Source:HGNC Symbol;Acc:HGNC:10571]
573	ANP32B	1.1081522538171e-113	0.4566634511112	0.941	0.57	1.74622632156499e-109	acidic nuclear phosphoprotein 32 family member B [Source:HGNC Symbol;Acc:HGNC:16677]
574	ZFAND2A	1.49664081519248e-113	0.457600559063153	0.329	0.091	2.35840659658031e-109	zinc finger AN1-type containing 2A [Source:HGNC Symbol;Acc:HGNC:28073]
575	H3C4	1.48537499447028e-112	-0.96080247004606	0.036	0.217	2.34065391628627e-108	H3 clustered histone 4 [Source:HGNC Symbol;Acc:HGNC:4767]
576	RPLP1	2.28106888209462e-112	0.295985319997078	0.987	0.989	3.5945083444047e-108	ribosomal protein lateral stalk subunit P1 [Source:HGNC Symbol;Acc:HGNC:10372]
577	FEM1C	2.79301075682772e-112	0.254410347789234	0.379	0.131	4.40122635060911e-108	fem-1 homolog C [Source:HGNC Symbol;Acc:HGNC:16933]
578	NRN1	3.25649249580928e-112	0.48407708274677	0.914	0.539	5.13158087489627e-108	neuritin 1 [Source:HGNC Symbol;Acc:HGNC:17972]
579	PDK1	3.33207399752971e-112	0.383653712439167	0.826	0.409	5.25068220530731e-108	pyruvate dehydrogenase kinase 1 [Source:HGNC Symbol;Acc:HGNC:8809]
580	PABPC1	3.44490012554071e-112	0.48637753607062	0.971	0.587	5.42847361782705e-108	poly(A) binding protein cytoplasmic 1 [Source:HGNC Symbol;Acc:HGNC:8554]
581	RPL12	8.34401157790444e-112	0.430493365433566	0.981	0.937	1.31484934444618e-107	ribosomal protein L12 [Source:HGNC Symbol;Acc:HGNC:10302]
582	KHSRP	1.33021216255158e-111	0.298669818491379	0.88	0.424	2.09614832574877e-107	KH-type splicing regulatory protein [Source:HGNC Symbol;Acc:HGNC:6316]
583	SSR2	3.75094818422716e-110	0.269230328916194	0.912	0.475	5.91074414870516e-106	signal sequence receptor subunit 2 [Source:HGNC Symbol;Acc:HGNC:11324]
584	CKB	7.37502744654724e-109	-0.54950671272818	0.966	0.899	1.16215682502691e-104	creatine kinase B [Source:HGNC Symbol;Acc:HGNC:1991]
585	RPLP0	7.46665399349104e-109	0.319954809182639	0.975	0.943	1.17659533629432e-104	ribosomal protein lateral stalk subunit P0 [Source:HGNC Symbol;Acc:HGNC:10371]
586	NIPBL	1.38452492164653e-108	0.276193786873005	0.757	0.374	2.18173437153061e-104	NIPBL cohesin loading factor [Source:HGNC Symbol;Acc:HGNC:28862]
587	TBR1	1.49800935594616e-108	0.270324880660702	0.5	0.23	2.36056314309996e-104	T-box brain transcription factor 1 [Source:HGNC Symbol;Acc:HGNC:11590]
588	TFRC	6.9156463278881e-108	0.310041155722908	0.537	0.258	1.08976754834861e-103	transferrin receptor [Source:HGNC Symbol;Acc:HGNC:11763]
589	SRRM2	7.48579090230786e-108	0.390279050254811	0.955	0.493	1.17961093038567e-103	serine/arginine repetitive matrix 2 [Source:HGNC Symbol;Acc:HGNC:16639]
590	TUBA1A	1.85402297677545e-107	-0.900018487288025	0.915	0.805	2.92156940680276e-103	tubulin alpha 1a [Source:HGNC Symbol;Acc:HGNC:20766]
591	RPS10	2.25193396433691e-107	0.312631272934665	0.979	0.964	3.5485975410021e-103	ribosomal protein S10 [Source:HGNC Symbol;Acc:HGNC:10383]
592	EWSR1	2.12014801829242e-106	0.28459275449793	0.779	0.38	3.3409292472252e-102	EWS RNA binding protein 1 [Source:HGNC Symbol;Acc:HGNC:3508]
593	HES6	5.81900267127209e-106	0.286230002159059	0.905	0.502	9.16958440939056e-102	hes family bHLH transcription factor 6 [Source:HGNC Symbol;Acc:HGNC:18254]
594	GXYLT1	7.7206928225044e-106	0.268280001980342	0.455	0.199	1.21662677497024e-101	glucoside xylosyltransferase 1 [Source:HGNC Symbol;Acc:HGNC:27482]
595	KLF5	1.15108158382227e-104	0.276850574952641	0.327	0.099	1.81387435978713e-100	Kruppel like factor 5 [Source:HGNC Symbol;Acc:HGNC:6349]
596	RORA	5.70266075610079e-102	0.283084399625352	0.509	0.241	8.98625281946363e-98	RAR related orphan receptor A [Source:HGNC Symbol;Acc:HGNC:10258]
597	RPL11	4.37984746260287e-101	0.297533966249622	0.984	0.956	6.90176363156961e-97	ribosomal protein L11 [Source:HGNC Symbol;Acc:HGNC:10301]
598	H1-2	4.5039708360502e-101	-1.53237015245532	0.82	0.784	7.09735724344791e-97	H1.2 linker histone, cluster member [Source:HGNC Symbol;Acc:HGNC:4716]
599	SLC25A5	3.23418134520115e-100	0.27649902373095	0.902	0.516	5.09642296376797e-96	solute carrier family 25 member 5 [Source:HGNC Symbol;Acc:HGNC:10991]
600	TCF7L1	5.66272194237182e-100	0.264279940973012	0.414	0.168	8.92331723678951e-96	transcription factor 7 like 1 [Source:HGNC Symbol;Acc:HGNC:11640]
601	GOLGB1	1.36920703937957e-99	0.462519372868688	0.724	0.376	2.15759645265433e-95	golgin B1 [Source:HGNC Symbol;Acc:HGNC:4429]
602	SYDE2	1.17752910754807e-98	0.274251021651364	0.369	0.142	1.85555036767424e-94	synapse defective Rho GTPase homolog 2 [Source:HGNC Symbol;Acc:HGNC:25841]
603	MED17	1.27681300098361e-98	0.388027546918274	0.423	0.186	2.01200192694997e-94	mediator complex subunit 17 [Source:HGNC Symbol;Acc:HGNC:2375]
604	RPL15	8.89067643335712e-98	0.323589190054947	0.977	0.953	1.40099279236842e-93	ribosomal protein L15 [Source:HGNC Symbol;Acc:HGNC:10306]
605	PCBP1	1.53409640963428e-96	0.251395309946532	0.928	0.485	2.41742912230169e-92	poly(rC) binding protein 1 [Source:HGNC Symbol;Acc:HGNC:8647]
606	TKT	2.06352096902371e-96	0.286704892510496	0.922	0.53	3.25169634298757e-92	transketolase [Source:HGNC Symbol;Acc:HGNC:11834]
607	MED13L	5.67021757321029e-96	0.3340652531393	0.601	0.297	8.93512885186478e-92	mediator complex subunit 13L [Source:HGNC Symbol;Acc:HGNC:22962]
608	ARGLU1	2.97129438839534e-94	0.397526840329644	0.98	0.584	4.68216569723338e-90	arginine and glutamate rich 1 [Source:HGNC Symbol;Acc:HGNC:25482]
609	KDM3A	4.721360311296e-94	0.290410396374081	0.541	0.273	7.43991957854024e-90	lysine demethylase 3A [Source:HGNC Symbol;Acc:HGNC:20815]
610	HSPA1A	1.5166004641217e-93	1.57859730628234	0.185	0.012	2.38985901136298e-89	heat shock protein family A (Hsp70) member 1A [Source:HGNC Symbol;Acc:HGNC:5232]
611	RPL30	5.57673373070098e-93	0.274613170028545	0.969	0.959	8.7878170128386e-89	ribosomal protein L30 [Source:HGNC Symbol;Acc:HGNC:10333]
612	HMGN2	2.00299100784785e-92	-0.582611509754734	0.961	0.817	3.15631323016665e-88	high mobility group nucleosomal binding domain 2 [Source:HGNC Symbol;Acc:HGNC:4986]
613	RPL29	2.38640708564434e-92	0.340499456261903	0.967	0.915	3.76050028555836e-88	ribosomal protein L29 [Source:HGNC Symbol;Acc:HGNC:10331]
614	HMGB1	6.72481053826392e-90	-0.556805420278401	0.978	0.908	1.05969564461963e-85	high mobility group box 1 [Source:HGNC Symbol;Acc:HGNC:4983]
615	COX6A1	1.58354799051581e-89	0.291692705740128	0.922	0.58	2.49535492345481e-85	cytochrome c oxidase subunit 6A1 [Source:HGNC Symbol;Acc:HGNC:2277]
616	FAU	2.24400024155528e-89	0.270922679351891	0.955	0.873	3.53609558064281e-85	FAU ubiquitin like and ribosomal protein S30 fusion [Source:HGNC Symbol;Acc:HGNC:3597]
617	SUMO2	7.45375307939125e-89	0.341196824240852	0.943	0.678	1.17456241025047e-84	small ubiquitin like modifier 2 [Source:HGNC Symbol;Acc:HGNC:11125]
618	XPO1	1.53421201786992e-88	0.420752271755345	0.926	0.479	2.41761129775942e-84	exportin 1 [Source:HGNC Symbol;Acc:HGNC:12825]
619	KLHL11	5.47442989586262e-88	0.296102558653868	0.332	0.122	8.62660662990031e-84	kelch like family member 11 [Source:HGNC Symbol;Acc:HGNC:19008]
620	RPS7	1.42268059233756e-87	0.288820941462848	0.991	0.99	2.24186007740553e-83	ribosomal protein S7 [Source:HGNC Symbol;Acc:HGNC:10440]
621	SPEN	7.53816430732472e-87	0.300037798654531	0.638	0.33	1.18786393154823e-82	spen family transcriptional repressor [Source:HGNC Symbol;Acc:HGNC:17575]
622	FUT11	3.26906726887973e-86	0.256600754924818	0.464	0.227	5.15139620230068e-82	fucosyltransferase 11 [Source:HGNC Symbol;Acc:HGNC:19233]
623	HSP90AA1	6.42885546147365e-86	0.686146280989064	0.984	0.793	1.01305904361902e-81	heat shock protein 90 alpha family class A member 1 [Source:HGNC Symbol;Acc:HGNC:5253]
624	GADD45B	2.52561840364312e-85	0.292378754171747	0.184	0.017	3.97986948046084e-81	growth arrest and DNA damage inducible beta [Source:HGNC Symbol;Acc:HGNC:4096]
625	SEC61G	4.01288273344061e-84	0.297907959638022	0.917	0.556	6.32350061135571e-80	SEC61 translocon subunit gamma [Source:HGNC Symbol;Acc:HGNC:18277]
626	SLC25A3	8.43472834127894e-84	0.289611304783119	0.944	0.613	1.32914449201874e-79	solute carrier family 25 member 3 [Source:HGNC Symbol;Acc:HGNC:10989]
627	TPR	1.35069955091066e-82	0.306058174537431	0.939	0.504	2.12843235232501e-78	translocated promoter region, nuclear basket protein [Source:HGNC Symbol;Acc:HGNC:12017]
628	H4C5	2.21581309944257e-82	-1.82869349309147	0.366	0.521	3.49167828210161e-78	H4 clustered histone 5 [Source:HGNC Symbol;Acc:HGNC:4790]
629	FBXO5	7.69395987489609e-82	0.346180567780401	0.587	0.308	1.21241419708613e-77	F-box protein 5 [Source:HGNC Symbol;Acc:HGNC:13584]
630	RPS27A	1.25127447215321e-81	0.277651367853535	0.987	0.984	1.97175831321903e-77	ribosomal protein S27a [Source:HGNC Symbol;Acc:HGNC:10417]
631	ADAM9	1.36909568492685e-81	0.336088205960378	0.367	0.158	2.15742098030772e-77	ADAM metallopeptidase domain 9 [Source:HGNC Symbol;Acc:HGNC:216]
632	RPS3A	5.05775608019103e-80	0.258908522184652	0.987	0.974	7.97001203116502e-76	ribosomal protein S3A [Source:HGNC Symbol;Acc:HGNC:10421]
633	RPS3	1.74333547334571e-79	0.279075797618902	0.975	0.953	2.74714803889817e-75	ribosomal protein S3 [Source:HGNC Symbol;Acc:HGNC:10420]
634	RPL22	6.54387498753677e-78	0.278373229920454	0.971	0.876	1.03118382053604e-73	ribosomal protein L22 [Source:HGNC Symbol;Acc:HGNC:10315]
635	H3-3B	7.57749281007955e-78	0.613039548092857	0.974	0.774	1.19406131701234e-73	H3.3 histone B [Source:HGNC Symbol;Acc:HGNC:4765]
636	TUBA1B	9.93431546688507e-76	-0.498131353677933	0.966	0.901	1.56544943127175e-71	tubulin alpha 1b [Source:HGNC Symbol;Acc:HGNC:18809]
637	DMAC1	9.35127934626066e-72	-0.266488205936166	0.659	0.342	1.47357459938376e-67	distal membrane arm assembly complex 1 [Source:HGNC Symbol;Acc:HGNC:30536]
638	RPL26	1.00903900070079e-70	0.264695402295762	0.975	0.955	1.5900436573043e-66	ribosomal protein L26 [Source:HGNC Symbol;Acc:HGNC:10327]
639	MT-ATP8	2.16620811162327e-70	-0.492824095157179	0.691	0.392	3.41351074229595e-66	mitochondrially encoded ATP synthase membrane subunit 8 [Source:HGNC Symbol;Acc:HGNC:7415]
640	CALM2	2.623667616797e-69	-0.397958969208814	0.969	0.851	4.13437543054871e-65	calmodulin 2 [Source:HGNC Symbol;Acc:HGNC:1445]
641	ARL6IP1	2.9872485127239e-68	0.254693456516162	0.793	0.427	4.70730620635032e-64	ADP ribosylation factor like GTPase 6 interacting protein 1 [Source:HGNC Symbol;Acc:HGNC:697]
642	HNRNPDL	6.5289716771184e-68	0.328388124650704	0.952	0.574	1.02883535688032e-63	heterogeneous nuclear ribonucleoprotein D like [Source:HGNC Symbol;Acc:HGNC:5037]
643	H1-4	1.51498806765301e-66	-1.33274026061167	0.79	0.719	2.38731819700761e-62	H1.4 linker histone, cluster member [Source:HGNC Symbol;Acc:HGNC:4718]
644	ATP5PB	7.69127664917487e-64	-0.267639055695433	0.815	0.427	1.21199137437698e-59	ATP synthase peripheral stalk-membrane subunit b [Source:HGNC Symbol;Acc:HGNC:840]
645	NCBP2	1.53231466650073e-63	-0.256252462099081	0.755	0.4	2.41462145147186e-59	nuclear cap binding protein subunit 2 [Source:HGNC Symbol;Acc:HGNC:7659]
646	POLR2J	8.6729428791412e-62	-0.278032565321695	0.701	0.369	1.36668233889507e-57	RNA polymerase II subunit J [Source:HGNC Symbol;Acc:HGNC:9197]
647	RPL19	2.0188866267378e-60	0.275568145183381	0.974	0.946	3.18136154641343e-56	ribosomal protein L19 [Source:HGNC Symbol;Acc:HGNC:10312]
648	JUND	9.3306994214992e-60	0.344055337273282	0.967	0.682	1.47033161483984e-55	JunD proto-oncogene, AP-1 transcription factor subunit [Source:HGNC Symbol;Acc:HGNC:6206]
649	MT-ND1	1.66537422293831e-59	0.394565085187601	0.99	0.716	2.6242967005062e-55	mitochondrially encoded NADH:ubiquinone oxidoreductase core subunit 1 [Source:HGNC Symbol;Acc:HGNC:7455]
650	NPM1	1.7119377878819e-59	0.270017696597017	0.981	0.884	2.69767156614429e-55	nucleophosmin 1 [Source:HGNC Symbol;Acc:HGNC:7910]
651	HSPA6	5.73206772366295e-59	0.996832188077798	0.112	0.004	9.03259231894808e-55	heat shock protein family A (Hsp70) member 6 [Source:HGNC Symbol;Acc:HGNC:5239]
652	CCNI	1.61794530227507e-56	0.31976276828826	0.945	0.639	2.54955820732505e-52	cyclin I [Source:HGNC Symbol;Acc:HGNC:1595]
653	PSMB4	2.16439171669229e-55	-0.275030508374421	0.829	0.433	3.41064846716372e-51	proteasome 20S subunit beta 4 [Source:HGNC Symbol;Acc:HGNC:9541]
654	PKM	3.51960249158878e-54	0.277230976597152	0.963	0.597	5.54618960624559e-50	pyruvate kinase M1/2 [Source:HGNC Symbol;Acc:HGNC:9021]
655	CDKN2AIPNL	2.50429128688167e-53	-0.252582433692225	0.62	0.336	3.94626220986813e-49	CDKN2A interacting protein N-terminal like [Source:HGNC Symbol;Acc:HGNC:30545]
656	NDUFV3	3.60810765314444e-53	-0.284334778665147	0.673	0.372	5.68565603982501e-49	NADH:ubiquinone oxidoreductase subunit V3 [Source:HGNC Symbol;Acc:HGNC:7719]
657	MT-ATP6	8.12048985610591e-53	0.468064278701479	0.995	0.804	1.27962679152517e-48	mitochondrially encoded ATP synthase membrane subunit 6 [Source:HGNC Symbol;Acc:HGNC:7414]
658	LAMTOR2	9.71685254192676e-53	-0.313265794864454	0.694	0.379	1.53118162355682e-48	late endosomal/lysosomal adaptor, MAPK and MTOR activator 2 [Source:HGNC Symbol;Acc:HGNC:29796]
659	CNIH4	1.28576828673463e-52	-0.272851686600776	0.809	0.441	2.02611366623643e-48	cornichon family AMPA receptor auxiliary protein 4 [Source:HGNC Symbol;Acc:HGNC:25013]
660	GTF2A2	4.07421365517689e-52	-0.253467136730811	0.781	0.411	6.42014587782774e-48	general transcription factor IIA subunit 2 [Source:HGNC Symbol;Acc:HGNC:4647]
661	MT-CO1	3.11608865296149e-51	0.359136811177955	0.999	0.904	4.91033249933672e-47	mitochondrially encoded cytochrome c oxidase I [Source:HGNC Symbol;Acc:HGNC:7419]
662	TPI1	1.53619828129517e-50	0.31618228628257	0.956	0.72	2.42074125166493e-46	triosephosphate isomerase 1 [Source:HGNC Symbol;Acc:HGNC:12009]
663	CMSS1	1.84527168572281e-50	-0.328939050020369	0.707	0.392	2.90777912236201e-46	cms1 ribosomal small subunit homolog [Source:HGNC Symbol;Acc:HGNC:28666]
664	RTN4	1.94701598775513e-50	0.265313566372282	0.962	0.557	3.06810779350454e-46	reticulon 4 [Source:HGNC Symbol;Acc:HGNC:14085]
665	NOSIP	1.36298001681044e-49	-0.283985489496754	0.676	0.367	2.14778391048989e-45	nitric oxide synthase interacting protein [Source:HGNC Symbol;Acc:HGNC:17946]
666	RPL4	3.53913020935877e-49	0.270613743359688	0.961	0.751	5.57696138390756e-45	ribosomal protein L4 [Source:HGNC Symbol;Acc:HGNC:10353]
667	TUBA4A	3.60616823711737e-49	-0.265992984241662	0.601	0.336	5.68259990804955e-45	tubulin alpha 4a [Source:HGNC Symbol;Acc:HGNC:12407]
668	NPDC1	3.84527325667928e-49	-0.295715978932068	0.676	0.373	6.05938159787521e-45	neural proliferation, differentiation and control 1 [Source:HGNC Symbol;Acc:HGNC:7899]
669	TBCB	4.46237124420421e-49	-0.285909202449547	0.689	0.372	7.031804606617e-45	tubulin folding cofactor B [Source:HGNC Symbol;Acc:HGNC:1989]
670	NDUFV1	5.37803474004872e-49	-0.26584107952875	0.621	0.336	8.47470714336878e-45	NADH:ubiquinone oxidoreductase core subunit V1 [Source:HGNC Symbol;Acc:HGNC:7716]
671	ACOT13	6.5843795363995e-49	-0.265229707316055	0.681	0.395	1.03756652734583e-44	acyl-CoA thioesterase 13 [Source:HGNC Symbol;Acc:HGNC:20999]
672	MGST3	1.55042206354441e-48	-0.576450462544905	0.919	0.735	2.44315508773328e-44	microsomal glutathione S-transferase 3 [Source:HGNC Symbol;Acc:HGNC:7064]
673	TPX2	2.51029648249569e-48	0.250353921380811	0.659	0.379	3.95572519711671e-44	TPX2 microtubule nucleation factor [Source:HGNC Symbol;Acc:HGNC:1249]
674	UBE2N	2.90280513342153e-48	-0.312543237886635	0.698	0.376	4.57424032924565e-44	ubiquitin conjugating enzyme E2 N [Source:HGNC Symbol;Acc:HGNC:12492]
675	INA	3.30091979884401e-48	-0.272260171368965	0.71	0.369	5.20158941901839e-44	internexin neuronal intermediate filament protein alpha [Source:HGNC Symbol;Acc:HGNC:6057]
676	MRPL55	1.52845956226364e-47	-0.265673992566496	0.627	0.344	2.40854657821504e-43	mitochondrial ribosomal protein L55 [Source:HGNC Symbol;Acc:HGNC:16686]
677	AKR7A2	1.56678090750156e-47	-0.265749420016256	0.565	0.313	2.46893335404096e-43	aldo-keto reductase family 7 member A2 [Source:HGNC Symbol;Acc:HGNC:389]
678	FAT3	8.88126750893658e-47	-0.378819244873787	0.047	0.155	1.39951013405823e-42	FAT atypical cadherin 3 [Source:HGNC Symbol;Acc:HGNC:23112]
679	MT-ND4L	1.17649064789727e-46	-0.517033504107589	0.932	0.583	1.85391396295652e-42	mitochondrially encoded NADH:ubiquinone oxidoreductase core subunit 4L [Source:HGNC Symbol;Acc:HGNC:7460]
680	PFDN6	1.68285234111144e-46	-0.295661738661811	0.784	0.432	2.6518387191234e-42	prefoldin subunit 6 [Source:HGNC Symbol;Acc:HGNC:4926]
681	TALDO1	2.67116779649842e-46	-0.293895221997305	0.744	0.399	4.20922621372221e-42	transaldolase 1 [Source:HGNC Symbol;Acc:HGNC:11559]
682	TMSB10	2.54901587549656e-45	-0.293328726045686	0.976	0.978	4.01673921660747e-41	thymosin beta 10 [Source:HGNC Symbol;Acc:HGNC:11879]
683	MRPL36	5.53845377225909e-45	-0.296165067429327	0.614	0.342	8.72749545432587e-41	mitochondrial ribosomal protein L36 [Source:HGNC Symbol;Acc:HGNC:14490]
684	H4C4	8.91175597721779e-45	-0.631220765434996	0.061	0.17	1.40431450688998e-40	H4 clustered histone 4 [Source:HGNC Symbol;Acc:HGNC:4782]
685	MED4	1.73605013132995e-44	-0.288095681891195	0.732	0.416	2.73566779694974e-40	mediator complex subunit 4 [Source:HGNC Symbol;Acc:HGNC:17903]
686	FIS1	6.02487216494018e-44	-0.305709142857559	0.737	0.397	9.49399355751274e-40	fission, mitochondrial 1 [Source:HGNC Symbol;Acc:HGNC:21689]
687	ITGB3BP	1.34368429354468e-43	-0.283212645078146	0.616	0.359	2.1173777097677e-39	integrin subunit beta 3 binding protein [Source:HGNC Symbol;Acc:HGNC:6157]
688	GAPDH	3.45940131681647e-43	0.276627221037917	0.978	0.926	5.45132459503939e-39	glyceraldehyde-3-phosphate dehydrogenase [Source:HGNC Symbol;Acc:HGNC:4141]
689	LRRC75A	5.57162806303689e-43	-0.344972280683091	0.555	0.323	8.77977150173353e-39	leucine rich repeat containing 75A [Source:HGNC Symbol;Acc:HGNC:32403]
690	RAMP1	6.76432781390397e-43	-0.257107152358058	0.701	0.391	1.06592277691499e-38	receptor activity modifying protein 1 [Source:HGNC Symbol;Acc:HGNC:9843]
691	PTGR1	2.04378351417969e-42	-0.284153401793315	0.742	0.425	3.22059406164436e-38	prostaglandin reductase 1 [Source:HGNC Symbol;Acc:HGNC:18429]
692	CDKN2A	2.51486122058902e-42	-0.286263865688531	0.79	0.432	3.96291831140417e-38	cyclin dependent kinase inhibitor 2A [Source:HGNC Symbol;Acc:HGNC:1787]
693	HRAS	3.9889715583606e-42	-0.349807735773971	0.679	0.37	6.28582138166463e-38	HRas proto-oncogene, GTPase [Source:HGNC Symbol;Acc:HGNC:5173]
694	SKA2	4.07157045760643e-42	-0.281436730126405	0.817	0.456	6.41598072709622e-38	spindle and kinetochore associated complex subunit 2 [Source:HGNC Symbol;Acc:HGNC:28006]
695	KCNK12	5.3997121070278e-42	-0.258147419178703	0.581	0.341	8.50886633825441e-38	potassium two pore domain channel subfamily K member 12 [Source:HGNC Symbol;Acc:HGNC:6274]
696	AURKAIP1	5.6284773866832e-42	-0.30598496844275	0.811	0.441	8.86935466593539e-38	aurora kinase A interacting protein 1 [Source:HGNC Symbol;Acc:HGNC:24114]
697	SMDT1	1.24645565540673e-41	-0.29595341860556	0.688	0.382	1.96416482178993e-37	single-pass membrane protein with aspartate rich tail 1 [Source:HGNC Symbol;Acc:HGNC:25055]
698	NSF	2.13250369721715e-41	-0.293281977065638	0.574	0.344	3.36039932607479e-37	N-ethylmaleimide sensitive factor, vesicle fusing ATPase [Source:HGNC Symbol;Acc:HGNC:8016]
699	MAGOH	2.56662595722646e-41	-0.300033493600361	0.604	0.348	4.04448918339746e-37	mago homolog, exon junction complex subunit [Source:HGNC Symbol;Acc:HGNC:6815]
700	WDR76	2.86985719920652e-41	-0.259215118259535	0.658	0.377	4.52232097450963e-37	WD repeat domain 76 [Source:HGNC Symbol;Acc:HGNC:25773]
701	MAGED2	2.94449876036773e-41	-0.288980284638339	0.612	0.35	4.63994114658747e-37	MAGE family member D2 [Source:HGNC Symbol;Acc:HGNC:16353]
702	TMEM160	3.44493458464241e-41	-0.383555325280303	0.723	0.401	5.42852791847951e-37	transmembrane protein 160 [Source:HGNC Symbol;Acc:HGNC:26042]
703	HNRNPA2B1	3.94059229025231e-41	-0.385758836477478	0.977	0.805	6.20958533097959e-37	heterogeneous nuclear ribonucleoprotein A2/B1 [Source:HGNC Symbol;Acc:HGNC:5033]
704	CKLF	7.21932806839854e-41	-0.261414614932447	0.59	0.352	1.13762171701824e-36	chemokine like factor [Source:HGNC Symbol;Acc:HGNC:13253]
705	NAA10	7.49796195743989e-41	-0.314354518960465	0.645	0.353	1.18152884525338e-36	N-alpha-acetyltransferase 10, NatA catalytic subunit [Source:HGNC Symbol;Acc:HGNC:18704]
706	NRP2	1.79724296912312e-40	-0.273604400061873	0.676	0.377	2.83209547074421e-36	neuropilin 2 [Source:HGNC Symbol;Acc:HGNC:8005]
707	PRIM1	5.58909451780874e-40	-0.272612265091005	0.551	0.334	8.80729514116301e-36	DNA primase subunit 1 [Source:HGNC Symbol;Acc:HGNC:9369]
708	MICOS13	4.85631050504649e-39	-0.289695693768377	0.665	0.377	7.65257409385226e-35	mitochondrial contact site and cristae organizing system subunit 13 [Source:HGNC Symbol;Acc:HGNC:33702]
709	PLEKHJ1	5.22575856911332e-39	-0.344410654707254	0.732	0.404	8.23475035320877e-35	pleckstrin homology domain containing J1 [Source:HGNC Symbol;Acc:HGNC:18211]
710	NTHL1	1.24552747382234e-38	-0.27569083493845	0.487	0.283	1.96270219324924e-34	nth like DNA glycosylase 1 [Source:HGNC Symbol;Acc:HGNC:8028]
711	TMA16	1.75258977090481e-38	-0.314934468684135	0.707	0.39	2.7617309609918e-34	translation machinery associated 16 homolog [Source:HGNC Symbol;Acc:HGNC:25638]
712	CRX	2.34003750989811e-38	-0.257104999465984	0.657	0.366	3.68743110809744e-34	cone-rod homeobox [Source:HGNC Symbol;Acc:HGNC:2383]
713	TAF11	2.42978851470914e-38	-0.257813832416486	0.746	0.411	3.82886074147866e-34	TATA-box binding protein associated factor 11 [Source:HGNC Symbol;Acc:HGNC:11544]
714	PAFAH1B3	3.61488344724583e-38	-0.285516794627303	0.821	0.452	5.69633333616998e-34	platelet activating factor acetylhydrolase 1b catalytic subunit 3 [Source:HGNC Symbol;Acc:HGNC:8576]
715	SYNC	4.740276780923e-38	-0.424119423312229	0.645	0.387	7.46972815137847e-34	syncoilin, intermediate filament protein [Source:HGNC Symbol;Acc:HGNC:28897]
716	H2BC4	9.14308930610262e-38	-1.30709255663662	0.254	0.365	1.44076801285565e-33	H2B clustered histone 4 [Source:HGNC Symbol;Acc:HGNC:4757]
717	DERA	1.19397901595741e-37	-0.267920450039783	0.638	0.363	1.88147213334569e-33	deoxyribose-phosphate aldolase [Source:HGNC Symbol;Acc:HGNC:24269]
718	TAF15	1.52628775775126e-37	-0.29811522797723	0.564	0.34	2.40512424866444e-33	TATA-box binding protein associated factor 15 [Source:HGNC Symbol;Acc:HGNC:11547]
719	ACBD6	2.95627724173512e-37	-0.328779703876135	0.722	0.413	4.6585016775262e-33	acyl-CoA binding domain containing 6 [Source:HGNC Symbol;Acc:HGNC:23339]
720	TMEM14B	4.15334317774647e-37	-0.458286385309459	0.928	0.75	6.54483817949288e-33	transmembrane protein 14B [Source:HGNC Symbol;Acc:HGNC:21384]
721	HSPB11	4.30408640402339e-37	-0.379248377413932	0.753	0.423	6.78237935546006e-33	heat shock protein family B (small) member 11 [Source:HGNC Symbol;Acc:HGNC:25019]
722	FSTL5	4.42726899070224e-37	-0.310489656956805	0.871	0.492	6.97649047554859e-33	follistatin like 5 [Source:HGNC Symbol;Acc:HGNC:21386]
723	CTPS1	4.67711342397993e-37	-0.260988517968778	0.582	0.342	7.37019533350758e-33	CTP synthase 1 [Source:HGNC Symbol;Acc:HGNC:2519]
724	EIF3J	6.17214088492628e-37	-0.381126267490132	0.713	0.399	9.72605960646683e-33	eukaryotic translation initiation factor 3 subunit J [Source:HGNC Symbol;Acc:HGNC:3270]
725	TXNL4A	7.23368803498326e-37	-0.3287097035896	0.711	0.393	1.13988456055266e-32	thioredoxin like 4A [Source:HGNC Symbol;Acc:HGNC:30551]
726	ECI1	2.19046527277869e-36	-0.341945948505558	0.697	0.394	3.45173517684466e-32	enoyl-CoA delta isomerase 1 [Source:HGNC Symbol;Acc:HGNC:2703]
727	VPS29	2.60445409734231e-36	-0.282531082433238	0.639	0.369	4.10409876659201e-32	VPS29 retromer complex component [Source:HGNC Symbol;Acc:HGNC:14340]
728	CAMTA1	3.51436038257621e-36	-0.267847026516978	0.871	0.494	5.53792909086359e-32	calmodulin binding transcription activator 1 [Source:HGNC Symbol;Acc:HGNC:18806]
729	PXMP2	1.04429601130794e-35	-0.32266759896582	0.611	0.349	1.64560165461905e-31	peroxisomal membrane protein 2 [Source:HGNC Symbol;Acc:HGNC:9716]
730	AHI1	1.12959877151358e-35	-0.348877756691294	0.67	0.393	1.7800217441511e-31	Abelson helper integration site 1 [Source:HGNC Symbol;Acc:HGNC:21575]
731	NOVA1	3.35869277620031e-35	-0.278184582812166	0.701	0.4	5.29262807673644e-31	NOVA alternative splicing regulator 1 [Source:HGNC Symbol;Acc:HGNC:7886]
732	H2AC4	1.89688631407827e-34	-0.790488542537151	0.126	0.239	2.98911345372453e-30	H2A clustered histone 4 [Source:HGNC Symbol;Acc:HGNC:4734]
733	TRAPPC2L	3.45963498884814e-34	-0.31958276459893	0.587	0.341	5.4516928154269e-30	trafficking protein particle complex 2 like [Source:HGNC Symbol;Acc:HGNC:30887]
734	H3C12	5.31625644962507e-34	-0.53781849285938	0.079	0.179	8.37735691331918e-30	H3 clustered histone 12 [Source:HGNC Symbol;Acc:HGNC:4774]
735	ATOX1	5.35382939464971e-34	-0.419970135579345	0.751	0.425	8.43656436008902e-30	antioxidant 1 copper chaperone [Source:HGNC Symbol;Acc:HGNC:798]
736	RNASEH2B	6.25364901601897e-34	-0.303006740569438	0.662	0.38	9.85450011944269e-30	ribonuclease H2 subunit B [Source:HGNC Symbol;Acc:HGNC:25671]
737	RRP36	1.03204742912901e-33	-0.342301398321978	0.706	0.399	1.6263003388215e-29	ribosomal RNA processing 36 [Source:HGNC Symbol;Acc:HGNC:21374]
738	TRIM13	1.46056854995266e-33	-0.317214608629669	0.515	0.319	2.3015639210154e-29	tripartite motif containing 13 [Source:HGNC Symbol;Acc:HGNC:9976]
739	EVL	1.50836088979791e-33	-0.253382399105652	0.596	0.34	2.37687509014354e-29	Enah/Vasp-like [Source:HGNC Symbol;Acc:HGNC:20234]
740	MAP2K2	2.48546096910716e-33	-0.283202060316436	0.867	0.478	3.91658939511906e-29	mitogen-activated protein kinase kinase 2 [Source:HGNC Symbol;Acc:HGNC:6842]
741	RAD51C	2.74689515459729e-33	-0.355544625009538	0.695	0.406	4.3285573846144e-29	RAD51 paralog C [Source:HGNC Symbol;Acc:HGNC:9820]
742	MRPL57	2.8054724169961e-33	-0.320636072177452	0.729	0.415	4.42086343470246e-29	mitochondrial ribosomal protein L57 [Source:HGNC Symbol;Acc:HGNC:14514]
743	PDCD4	3.31038252053297e-33	-0.271085077855414	0.574	0.354	5.21650077585585e-29	programmed cell death 4 [Source:HGNC Symbol;Acc:HGNC:8763]
744	NDUFA3	3.54612036298611e-33	-0.404095485114943	0.821	0.475	5.58797646799351e-29	NADH:ubiquinone oxidoreductase subunit A3 [Source:HGNC Symbol;Acc:HGNC:7686]
745	FSD1L	6.69346502718134e-33	-0.280871348034986	0.713	0.406	1.05475621898323e-28	fibronectin type III and SPRY domain containing 1 like [Source:HGNC Symbol;Acc:HGNC:13753]
746	TPRKB	9.46376080330602e-33	-0.407830174103099	0.802	0.447	1.49129942738496e-28	TP53RK binding protein [Source:HGNC Symbol;Acc:HGNC:24259]
747	ARG2	2.50309517308679e-32	-0.250837704346633	0.669	0.391	3.94437737375017e-28	arginase 2 [Source:HGNC Symbol;Acc:HGNC:664]
748	SNRPG	3.57111996377399e-32	-0.603596900978427	0.914	0.684	5.62737083891506e-28	small nuclear ribonucleoprotein polypeptide G [Source:HGNC Symbol;Acc:HGNC:11163]
749	ARL3	4.00822307883666e-32	-0.284672440437843	0.86	0.49	6.31615792763081e-28	ADP ribosylation factor like GTPase 3 [Source:HGNC Symbol;Acc:HGNC:694]
750	PHC2	8.00005371392462e-32	-0.282770741068085	0.592	0.345	1.26064846424024e-27	polyhomeotic homolog 2 [Source:HGNC Symbol;Acc:HGNC:3183]
751	FDPS	8.39058558089771e-32	-0.621731776093325	0.907	0.689	1.32218847583786e-27	farnesyl diphosphate synthase [Source:HGNC Symbol;Acc:HGNC:3631]
752	DDX50	1.29484359635351e-31	-0.300026609329782	0.638	0.379	2.04041453913386e-27	DExD-box helicase 50 [Source:HGNC Symbol;Acc:HGNC:17906]
753	PEPD	1.51134595041387e-31	-0.2727636885767	0.539	0.316	2.38157894866218e-27	peptidase D [Source:HGNC Symbol;Acc:HGNC:8840]
754	PSMD4	3.61820757450281e-31	-0.332634917831606	0.7	0.4	5.70157149590154e-27	proteasome 26S subunit, non-ATPase 4 [Source:HGNC Symbol;Acc:HGNC:9561]
755	DYNLL1	4.31050891825513e-31	-0.834587882426422	0.875	0.647	6.79249995338643e-27	dynein light chain LC8-type 1 [Source:HGNC Symbol;Acc:HGNC:15476]
756	BEX3	7.98689340656595e-31	-0.35882950881447	0.81	0.451	1.25857466300666e-26	brain expressed X-linked 3 [Source:HGNC Symbol;Acc:HGNC:13388]
757	NUDT5	9.12083862123238e-31	-0.297622584420068	0.634	0.365	1.4372617499338e-26	nudix hydrolase 5 [Source:HGNC Symbol;Acc:HGNC:8052]
758	PDAP1	9.79122829273232e-31	-0.328339657088563	0.686	0.397	1.54290175436876e-26	PDGFA associated protein 1 [Source:HGNC Symbol;Acc:HGNC:14634]
759	PRDX2	2.08379885034785e-30	-0.442722127417444	0.912	0.735	3.28365022837814e-26	peroxiredoxin 2 [Source:HGNC Symbol;Acc:HGNC:9353]
760	NCAPD3	2.21595848167539e-30	-0.30748701772176	0.649	0.389	3.49190737542408e-26	non-SMC condensin II complex subunit D3 [Source:HGNC Symbol;Acc:HGNC:28952]
761	COMMD1	3.13559052336921e-30	-0.316369448508981	0.531	0.321	4.94106354672521e-26	copper metabolism domain containing 1 [Source:HGNC Symbol;Acc:HGNC:23024]
762	NDUFB10	2.08602539497962e-29	-0.352971798571062	0.84	0.461	3.28715881740889e-25	NADH:ubiquinone oxidoreductase subunit B10 [Source:HGNC Symbol;Acc:HGNC:7696]
763	SMIM4	3.59473137631246e-29	-0.313707129638863	0.507	0.312	5.66457770279317e-25	small integral membrane protein 4 [Source:HGNC Symbol;Acc:HGNC:37257]
764	DENR	3.7135188445925e-29	-0.337410006755447	0.615	0.366	5.85176299530886e-25	density regulated re-initiation and release factor [Source:HGNC Symbol;Acc:HGNC:2769]
765	HES4	5.38388743773887e-29	-0.45915245481294	0.693	0.411	8.48392982438892e-25	hes family bHLH transcription factor 4 [Source:HGNC Symbol;Acc:HGNC:24149]
766	RAB26	5.59962118249359e-29	-0.285315233222461	0.558	0.328	8.8238830593734e-25	RAB26, member RAS oncogene family [Source:HGNC Symbol;Acc:HGNC:14259]
767	FHIT	6.49032407053169e-29	-0.345457618401158	0.633	0.389	1.02274526703438e-24	fragile histidine triad diadenosine triphosphatase [Source:HGNC Symbol;Acc:HGNC:3701]
768	NCBP2AS2	2.6404009137564e-28	-0.352345334510119	0.626	0.365	4.16074375989733e-24	NCBP2 antisense 2 (head to head) [Source:HGNC Symbol;Acc:HGNC:25121]
769	UCHL1	5.62210910936268e-28	-0.319289602417668	0.522	0.323	8.85931953453371e-24	ubiquitin C-terminal hydrolase L1 [Source:HGNC Symbol;Acc:HGNC:12513]
770	PIH1D1	6.15948369358133e-28	-0.338277483833742	0.525	0.325	9.70611440434546e-24	PIH1 domain containing 1 [Source:HGNC Symbol;Acc:HGNC:26075]
771	ARL6IP6	8.69182719289318e-28	-0.259020911111569	0.548	0.342	1.36965812905611e-23	ADP ribosylation factor like GTPase 6 interacting protein 6 [Source:HGNC Symbol;Acc:HGNC:24048]
772	THOC7	1.85854295824344e-27	-0.390076613194294	0.671	0.391	2.92869199360001e-23	THO complex 7 [Source:HGNC Symbol;Acc:HGNC:29874]
773	FIBP	3.90051980234508e-27	-0.254750627232479	0.532	0.323	6.14643910453539e-23	FGF1 intracellular binding protein [Source:HGNC Symbol;Acc:HGNC:3705]
774	NDUFB6	3.99309996486191e-27	-0.453964966824307	0.766	0.44	6.2923269246294e-23	NADH:ubiquinone oxidoreductase subunit B6 [Source:HGNC Symbol;Acc:HGNC:7701]
775	GPANK1	1.01269047931769e-26	-0.333583423642525	0.699	0.406	1.59579765730882e-22	G-patch domain and ankyrin repeats 1 [Source:HGNC Symbol;Acc:HGNC:13920]
776	PDE3B	1.18614365401288e-26	-0.330022940913913	0.126	0.227	1.8691251699935e-22	phosphodiesterase 3B [Source:HGNC Symbol;Acc:HGNC:8779]
777	UPF3A	1.33706772283545e-26	-0.267613231811106	0.846	0.468	2.1069513176441e-22	UPF3A regulator of nonsense mediated mRNA decay [Source:HGNC Symbol;Acc:HGNC:20332]
778	E2F1	1.39566750637572e-26	-0.269296814886636	0.651	0.388	2.19929285654686e-22	E2F transcription factor 1 [Source:HGNC Symbol;Acc:HGNC:3113]
779	TMEM237	1.43196759572136e-26	-0.274166214965154	0.524	0.319	2.25649453733771e-22	transmembrane protein 237 [Source:HGNC Symbol;Acc:HGNC:14432]
780	NME1	1.4923763264959e-26	-0.352063939668505	0.755	0.433	2.35168661529224e-22	NME/NM23 nucleoside diphosphate kinase 1 [Source:HGNC Symbol;Acc:HGNC:7849]
781	REEP6	1.59398048941684e-26	-0.29422267607998	0.668	0.38	2.51179445522306e-22	receptor accessory protein 6 [Source:HGNC Symbol;Acc:HGNC:30078]
782	ZNF431	1.86491338669571e-26	-0.273394320274574	0.595	0.359	2.9387305147551e-22	zinc finger protein 431 [Source:HGNC Symbol;Acc:HGNC:20809]
783	ZNF738	2.11406023398765e-26	-0.325209541550027	0.768	0.434	3.33133611671774e-22	zinc finger protein 738 [Source:HGNC Symbol;Acc:HGNC:32469]
784	SNF8	2.31404298616948e-26	-0.348307095465585	0.681	0.399	3.64646893760587e-22	SNF8 subunit of ESCRT-II [Source:HGNC Symbol;Acc:HGNC:17028]
785	PEG10	2.73623250598363e-26	-0.453455431591858	0.956	0.731	4.31175518292901e-22	paternally expressed 10 [Source:HGNC Symbol;Acc:HGNC:14005]
786	RAB8A	3.64574178640381e-26	-0.258180737164305	0.494	0.309	5.74495990701513e-22	RAB8A, member RAS oncogene family [Source:HGNC Symbol;Acc:HGNC:7007]
787	GPM6A	4.12157311637082e-26	-0.328418298249293	0.611	0.359	6.49477491677714e-22	glycoprotein M6A [Source:HGNC Symbol;Acc:HGNC:4460]
788	AHCY	5.5534341612871e-26	-0.340105381168853	0.779	0.426	8.75110155135622e-22	adenosylhomocysteinase [Source:HGNC Symbol;Acc:HGNC:343]
789	COX17	5.56155353305974e-26	-0.441710686767962	0.828	0.494	8.76389605739554e-22	cytochrome c oxidase copper chaperone COX17 [Source:HGNC Symbol;Acc:HGNC:2264]
790	SPTBN1	6.11712630353696e-26	-0.295795873833254	0.628	0.385	9.63936762911355e-22	spectrin beta, non-erythrocytic 1 [Source:HGNC Symbol;Acc:HGNC:11275]
791	DHX30	9.24345742105171e-26	-0.268151672084681	0.504	0.317	1.45658402040933e-21	DExH-box helicase 30 [Source:HGNC Symbol;Acc:HGNC:16716]
792	MATK	1.02419545440277e-25	-0.264008749347236	0.526	0.318	1.61392719704789e-21	megakaryocyte-associated tyrosine kinase [Source:HGNC Symbol;Acc:HGNC:6906]
793	PSMC5	1.42804326185955e-25	-0.340017856529811	0.601	0.36	2.25031057203828e-21	proteasome 26S subunit, ATPase 5 [Source:HGNC Symbol;Acc:HGNC:9552]
794	CSRP2	1.4678739342792e-25	-0.2500814910782	0.804	0.475	2.31307574563716e-21	cysteine and glycine rich protein 2 [Source:HGNC Symbol;Acc:HGNC:2470]
795	SLIT3	2.46809206582353e-25	-0.261884207430161	0.071	0.155	3.88921947732472e-21	slit guidance ligand 3 [Source:HGNC Symbol;Acc:HGNC:11087]
796	TMEM107	3.06530910062003e-25	-0.294305154741014	0.502	0.317	4.83031408075704e-21	transmembrane protein 107 [Source:HGNC Symbol;Acc:HGNC:28128]
797	ETFB	3.40546909759205e-25	-0.400136393803532	0.582	0.362	5.36633820398556e-21	electron transfer flavoprotein subunit beta [Source:HGNC Symbol;Acc:HGNC:3482]
798	ATP5PD	5.35215230222596e-25	-0.35711853918789	0.811	0.468	8.43392159784767e-21	ATP synthase peripheral stalk subunit d [Source:HGNC Symbol;Acc:HGNC:845]
799	KCTD20	6.43188293228609e-25	-0.291945286714164	0.628	0.36	1.01353611246964e-20	potassium channel tetramerization domain containing 20 [Source:HGNC Symbol;Acc:HGNC:21052]
800	NEDD8	7.82732606962911e-25	-0.291674219309435	0.838	0.481	1.23343004205216e-20	NEDD8 ubiquitin like modifier [Source:HGNC Symbol;Acc:HGNC:7732]
801	SRRM4	8.88717186469916e-25	-0.253953773511209	0.616	0.367	1.40044054243929e-20	serine/arginine repetitive matrix 4 [Source:HGNC Symbol;Acc:HGNC:29389]
802	TIMM10	8.98198774043013e-25	-0.417309559340621	0.543	0.33	1.41538162813698e-20	translocase of inner mitochondrial membrane 10 [Source:HGNC Symbol;Acc:HGNC:11814]
803	CHCHD5	1.3439669031922e-24	-0.262952698085833	0.462	0.292	2.11782304605028e-20	coiled-coil-helix-coiled-coil-helix domain containing 5 [Source:HGNC Symbol;Acc:HGNC:17840]
804	H2AC16	2.03811889264555e-24	-0.446983402650199	0.04	0.106	3.21166775103086e-20	H2A clustered histone 16 [Source:HGNC Symbol;Acc:HGNC:4730]
805	PSMA4	2.29918849732314e-24	-0.343573057503318	0.869	0.5	3.6230612340818e-20	proteasome 20S subunit alpha 4 [Source:HGNC Symbol;Acc:HGNC:9533]
806	CDH23	2.63036729906414e-24	-0.269644938425533	0.532	0.339	4.14493278986527e-20	cadherin related 23 [Source:HGNC Symbol;Acc:HGNC:13733]
807	H4C8	2.71855840303086e-24	-0.535423474715417	0.097	0.185	4.28390433149603e-20	H4 clustered histone 8 [Source:HGNC Symbol;Acc:HGNC:4788]
808	E2F3	3.35839089141308e-24	-0.316668021696869	0.65	0.394	5.29215236668873e-20	E2F transcription factor 3 [Source:HGNC Symbol;Acc:HGNC:3115]
809	MRPS18C	3.81682489027429e-24	-0.415636499518621	0.555	0.346	6.01455266209423e-20	mitochondrial ribosomal protein S18C [Source:HGNC Symbol;Acc:HGNC:16633]
810	ARPC5	5.64411087240463e-24	-0.346807277400393	0.796	0.46	8.89398991273522e-20	actin related protein 2/3 complex subunit 5 [Source:HGNC Symbol;Acc:HGNC:708]
811	NDUFB2	8.04493335176319e-24	-0.685802681881694	0.891	0.652	1.26772059757084e-19	NADH:ubiquinone oxidoreductase subunit B2 [Source:HGNC Symbol;Acc:HGNC:7697]
812	PSMB7	1.45480656145974e-23	-0.304623778392012	0.867	0.494	2.29248417954827e-19	proteasome 20S subunit beta 7 [Source:HGNC Symbol;Acc:HGNC:9544]
813	CD320	1.48030224784523e-23	-0.339021823289535	0.611	0.367	2.33266028215451e-19	CD320 molecule [Source:HGNC Symbol;Acc:HGNC:16692]
814	STMN3	3.00069317587549e-23	-0.36789127493161	0.683	0.393	4.72849230654459e-19	stathmin 3 [Source:HGNC Symbol;Acc:HGNC:15926]
815	MAGEF1	3.07853114723633e-23	-0.302022307723999	0.476	0.31	4.85114938181501e-19	MAGE family member F1 [Source:HGNC Symbol;Acc:HGNC:29639]
816	FMC1	3.08377315735005e-23	-0.447087487823723	0.622	0.384	4.8594097413522e-19	formation of mitochondrial complex V assembly factor 1 homolog [Source:HGNC Symbol;Acc:HGNC:26946]
817	SUPT16H	3.23417044479535e-23	-0.321110400593365	0.796	0.458	5.09640578690851e-19	SPT16 homolog, facilitates chromatin remodeling subunit [Source:HGNC Symbol;Acc:HGNC:11465]
818	TXNDC17	3.23562761033934e-23	-0.463972145907714	0.752	0.426	5.09870198837274e-19	thioredoxin domain containing 17 [Source:HGNC Symbol;Acc:HGNC:28218]
819	H2AC13	3.31666873004372e-23	-0.697496065936021	0.13	0.219	5.2264065848029e-19	H2A clustered histone 13 [Source:HGNC Symbol;Acc:HGNC:4725]
820	RPA3	3.69479349487299e-23	-0.401795204079549	0.729	0.429	5.82225558922086e-19	replication protein A3 [Source:HGNC Symbol;Acc:HGNC:10291]
821	MRLN	4.05841571129511e-23	-0.327374298672977	0.503	0.33	6.39525147785884e-19	myoregulin [Source:HGNC Symbol;Acc:HGNC:48649]
822	PSMB1	4.13909947368714e-23	-0.276283827670909	0.875	0.506	6.52239295063619e-19	proteasome 20S subunit beta 1 [Source:HGNC Symbol;Acc:HGNC:9537]
823	NELFE	4.16766155211098e-23	-0.377259412796343	0.688	0.41	6.56740107381648e-19	negative elongation factor complex member E [Source:HGNC Symbol;Acc:HGNC:13974]
824	H2BC17	4.24491835115142e-23	-0.817851388528576	0.163	0.254	6.6891423377444e-19	H2B clustered histone 17 [Source:HGNC Symbol;Acc:HGNC:4758]
825	AAK1	4.57065429307348e-23	-0.250713006704867	0.507	0.323	7.20243703502519e-19	AP2 associated kinase 1 [Source:HGNC Symbol;Acc:HGNC:19679]
826	FAM172A	5.87045487609214e-23	-0.252870968652068	0.412	0.273	9.250662793746e-19	family with sequence similarity 172 member A [Source:HGNC Symbol;Acc:HGNC:25365]
827	COA4	7.29996798929207e-23	-0.268337938661289	0.514	0.33	1.15032895575264e-18	cytochrome c oxidase assembly factor 4 homolog [Source:HGNC Symbol;Acc:HGNC:24604]
828	C4orf48	7.7106904067098e-23	-0.416545193115405	0.514	0.329	1.21505059428933e-18	chromosome 4 open reading frame 48 [Source:HGNC Symbol;Acc:HGNC:34437]
829	H2AC17	1.03096006843869e-22	-1.35702172717062	0.524	0.519	1.62458687584568e-18	H2A clustered histone 17 [Source:HGNC Symbol;Acc:HGNC:4735]
830	TRPC5	1.92554783670163e-22	-0.277078276867535	0.122	0.215	3.03427828107443e-18	transient receptor potential cation channel subfamily C member 5 [Source:HGNC Symbol;Acc:HGNC:12337]
831	NDUFB8	2.91387331570575e-22	-0.272312309970401	0.863	0.51	4.59168157088911e-18	NADH:ubiquinone oxidoreductase subunit B8 [Source:HGNC Symbol;Acc:HGNC:7703]
832	DPP10	3.13684385286696e-22	-0.331118959950273	0.713	0.424	4.94303854334775e-18	dipeptidyl peptidase like 10 [Source:HGNC Symbol;Acc:HGNC:20823]
833	ISL1	7.08133074604673e-22	-0.297319944625632	0.107	0.193	1.11587609896204e-17	ISL LIM homeobox 1 [Source:HGNC Symbol;Acc:HGNC:6132]
834	RALGAPA1	9.21149363057194e-22	-0.361073027318936	0.716	0.416	1.45154716630553e-17	Ral GTPase activating protein catalytic subunit alpha 1 [Source:HGNC Symbol;Acc:HGNC:17770]
835	TMEM141	9.87122816014622e-22	-0.361884856741264	0.54	0.34	1.55550813347584e-17	transmembrane protein 141 [Source:HGNC Symbol;Acc:HGNC:28211]
836	CENPW	9.94841415734172e-22	-0.362347156317492	0.576	0.368	1.56767110291391e-17	centromere protein W [Source:HGNC Symbol;Acc:HGNC:21488]
837	CLPTM1L	1.19362310111687e-21	-0.256516830723889	0.482	0.303	1.88091128273997e-17	CLPTM1 like [Source:HGNC Symbol;Acc:HGNC:24308]
838	CST3	1.33815048007045e-21	-0.283624732817215	0.536	0.338	2.10865752649502e-17	cystatin C [Source:HGNC Symbol;Acc:HGNC:2475]
839	LARS1	1.36493415856763e-21	-0.329009246247423	0.77	0.466	2.15086324707088e-17	leucyl-tRNA synthetase 1 [Source:HGNC Symbol;Acc:HGNC:6512]
840	CNPY2	1.41909313156892e-21	-0.3155392427064	0.578	0.363	2.23620695672631e-17	canopy FGF signaling regulator 2 [Source:HGNC Symbol;Acc:HGNC:13529]
841	ADGRV1	1.63668253477227e-21	-0.410285637458484	0.567	0.364	2.57908433829415e-17	adhesion G protein-coupled receptor V1 [Source:HGNC Symbol;Acc:HGNC:17416]
842	PTBP2	4.17599684908446e-21	-0.328839454461216	0.679	0.412	6.58053583478729e-17	polypyrimidine tract binding protein 2 [Source:HGNC Symbol;Acc:HGNC:17662]
843	PSMG1	4.60122432931622e-21	-0.281447453271603	0.486	0.312	7.25060929813651e-17	proteasome assembly chaperone 1 [Source:HGNC Symbol;Acc:HGNC:3043]
844	LHX4	4.99207492893583e-21	-0.302039237637421	0.781	0.439	7.86651167301707e-17	LIM homeobox 4 [Source:HGNC Symbol;Acc:HGNC:21734]
845	SSBP1	7.52989013507032e-21	-0.347247096121301	0.833	0.48	1.18656008748438e-16	single stranded DNA binding protein 1 [Source:HGNC Symbol;Acc:HGNC:11317]
846	COPS9	9.08020418720587e-21	-0.37835465683098	0.831	0.471	1.4308585758199e-16	COP9 signalosome subunit 9 [Source:HGNC Symbol;Acc:HGNC:21314]
847	ZNF141	9.75298963333684e-21	-0.258936927101697	0.524	0.343	1.53687610642122e-16	zinc finger protein 141 [Source:HGNC Symbol;Acc:HGNC:12926]
848	ROBO1	9.98974655961309e-21	-0.25251237805767	0.662	0.397	1.57418426286383e-16	roundabout guidance receptor 1 [Source:HGNC Symbol;Acc:HGNC:10249]
849	H4C15	1.22338814323704e-20	-0.580202947267012	0.111	0.192	1.92781503611293e-16	H4 clustered histone 15 [Source:HGNC Symbol;Acc:HGNC:29607]
850	CADPS	1.25821480199366e-20	-0.343665213829095	0.652	0.396	1.9826948849816e-16	calcium dependent secretion activator [Source:HGNC Symbol;Acc:HGNC:1426]
851	ANAPC15	2.20290689999232e-20	-0.39872071120539	0.546	0.335	3.4713406930079e-16	anaphase promoting complex subunit 15 [Source:HGNC Symbol;Acc:HGNC:24531]
852	NDUFV2	3.35059121227254e-20	-0.483296393844399	0.724	0.418	5.27986163229907e-16	NADH:ubiquinone oxidoreductase core subunit V2 [Source:HGNC Symbol;Acc:HGNC:7717]
853	DNMT3A	3.57451577774438e-20	-0.326093164123696	0.571	0.349	5.6327219625696e-16	DNA methyltransferase 3 alpha [Source:HGNC Symbol;Acc:HGNC:2978]
854	TSTD1	5.15671881886452e-20	-0.502590798771729	0.648	0.396	8.12595751476671e-16	thiosulfate sulfurtransferase like domain containing 1 [Source:HGNC Symbol;Acc:HGNC:35410]
855	PTPRA	5.76728803763048e-20	-0.295909215309434	0.448	0.301	9.08809248969812e-16	protein tyrosine phosphatase receptor type A [Source:HGNC Symbol;Acc:HGNC:9664]
856	NRXN1	1.13681614421706e-19	-0.61934434104119	0.886	0.512	1.79139488005725e-15	neurexin 1 [Source:HGNC Symbol;Acc:HGNC:8008]
857	DTYMK	1.45029339037529e-19	-0.343968250592389	0.636	0.406	2.28537232455339e-15	deoxythymidylate kinase [Source:HGNC Symbol;Acc:HGNC:3061]
858	POLR2L	2.14520480882812e-19	-0.466926997348075	0.754	0.453	3.38041373775135e-15	RNA polymerase II, I and III subunit L [Source:HGNC Symbol;Acc:HGNC:9199]
859	ODC1	2.29798080545222e-19	-0.269482167896623	0.855	0.505	3.62115815323161e-15	ornithine decarboxylase 1 [Source:HGNC Symbol;Acc:HGNC:8109]
860	MRPS25	2.69556476676734e-19	-0.259887375514387	0.481	0.316	4.24767095947197e-15	mitochondrial ribosomal protein S25 [Source:HGNC Symbol;Acc:HGNC:14511]
861	GPC5	2.87715169615197e-19	-0.404843901286522	0.549	0.365	4.53381564279627e-15	glypican 5 [Source:HGNC Symbol;Acc:HGNC:4453]
862	NEK2	3.14871814556286e-19	0.423318413310451	0.36	0.251	4.96175005377796e-15	NIMA related kinase 2 [Source:HGNC Symbol;Acc:HGNC:7745]
863	PBRM1	4.21413971005518e-19	-0.255209029658538	0.595	0.371	6.64064135510495e-15	polybromo 1 [Source:HGNC Symbol;Acc:HGNC:30064]
864	DDX1	4.45543562495097e-19	-0.382375444998416	0.751	0.434	7.02087545779775e-15	DEAD-box helicase 1 [Source:HGNC Symbol;Acc:HGNC:2734]
865	APRT	4.78838245854021e-19	-0.375739500154276	0.528	0.34	7.54553307816766e-15	adenine phosphoribosyltransferase [Source:HGNC Symbol;Acc:HGNC:626]
866	PSMC3	4.82734322667777e-19	-0.501712367948845	0.734	0.431	7.60692745659884e-15	proteasome 26S subunit, ATPase 3 [Source:HGNC Symbol;Acc:HGNC:9549]
867	NAP1L4	5.35030244614307e-19	-0.324132520481226	0.744	0.442	8.43100659463225e-15	nucleosome assembly protein 1 like 4 [Source:HGNC Symbol;Acc:HGNC:7640]
868	XPO5	6.42596161107133e-19	-0.340975444371736	0.561	0.355	1.01260303067262e-14	exportin 5 [Source:HGNC Symbol;Acc:HGNC:17675]
869	TFPI2	9.76953602208977e-19	-0.261833235246871	0.484	0.32	1.53948348636091e-14	tissue factor pathway inhibitor 2 [Source:HGNC Symbol;Acc:HGNC:11761]
870	SNRPE	1.33571406862048e-18	-0.439198945018674	0.915	0.697	2.10481822933214e-14	small nuclear ribonucleoprotein polypeptide E [Source:HGNC Symbol;Acc:HGNC:11161]
871	DPYSL3	1.6126937457128e-18	-0.370949307040736	0.77	0.435	2.54128280449423e-14	dihydropyrimidinase like 3 [Source:HGNC Symbol;Acc:HGNC:3015]
872	AGPAT1	2.32420815063446e-18	-0.303071589905122	0.545	0.338	3.66248720376977e-14	1-acylglycerol-3-phosphate O-acyltransferase 1 [Source:HGNC Symbol;Acc:HGNC:324]
873	PRADC1	2.46972342072871e-18	-0.309007622786486	0.453	0.294	3.8917901663843e-14	protease associated domain containing 1 [Source:HGNC Symbol;Acc:HGNC:16047]
874	UBL5	2.51834556819846e-18	-0.44800290962634	0.913	0.711	3.96840894636713e-14	ubiquitin like 5 [Source:HGNC Symbol;Acc:HGNC:13736]
875	STRADB	2.52915631129269e-18	-0.890564481795939	0.428	0.41	3.98544451533503e-14	STE20 related adaptor beta [Source:HGNC Symbol;Acc:HGNC:13205]
876	CENPK	3.00680528913503e-18	-0.354771053892157	0.522	0.344	4.73812377461899e-14	centromere protein K [Source:HGNC Symbol;Acc:HGNC:29479]
877	NDUFA13	3.20611940465808e-18	-0.77780616181514	0.859	0.629	5.0522029578602e-14	NADH:ubiquinone oxidoreductase subunit A13 [Source:HGNC Symbol;Acc:HGNC:17194]
878	BOLA3	3.5405336869802e-18	-0.351102942381534	0.527	0.341	5.57917298394341e-14	bolA family member 3 [Source:HGNC Symbol;Acc:HGNC:24415]
879	SACS	3.54842880601996e-18	-0.307894387229262	0.54	0.353	5.59161411252625e-14	sacsin molecular chaperone [Source:HGNC Symbol;Acc:HGNC:10519]
880	EPB41	3.84937572070123e-18	-0.375234776426411	0.696	0.419	6.065846260681e-14	erythrocyte membrane protein band 4.1 [Source:HGNC Symbol;Acc:HGNC:3377]
881	CPSF3	4.20366920738636e-18	-0.342787387263057	0.488	0.323	6.62414193699942e-14	cleavage and polyadenylation specific factor 3 [Source:HGNC Symbol;Acc:HGNC:2326]
882	ARL6IP4	5.30542996770905e-18	-0.411946151125889	0.81	0.471	8.36029654311592e-14	ADP ribosylation factor like GTPase 6 interacting protein 4 [Source:HGNC Symbol;Acc:HGNC:18076]
883	ANK2	8.7354416932239e-18	-0.291596748971999	0.561	0.362	1.37653090201822e-13	ankyrin 2 [Source:HGNC Symbol;Acc:HGNC:493]
884	FKBP3	1.17419964716644e-17	-0.345814246835046	0.841	0.485	1.85030380400488e-13	FKBP prolyl isomerase 3 [Source:HGNC Symbol;Acc:HGNC:3719]
885	SLC38A5	1.62159419918698e-17	-0.348318750378393	0.583	0.366	2.55530813907884e-13	solute carrier family 38 member 5 [Source:HGNC Symbol;Acc:HGNC:18070]
886	NAE1	4.57560675148381e-17	-0.356951096953033	0.542	0.35	7.21024111898819e-13	NEDD8 activating enzyme E1 subunit 1 [Source:HGNC Symbol;Acc:HGNC:621]
887	SRGAP3	5.87441016851465e-17	-0.350202774780262	0.554	0.357	9.25689554354539e-13	SLIT-ROBO Rho GTPase activating protein 3 [Source:HGNC Symbol;Acc:HGNC:19744]
888	MXD4	6.23428633713186e-17	-0.363174296910068	0.555	0.346	9.82398841005239e-13	MAX dimerization protein 4 [Source:HGNC Symbol;Acc:HGNC:13906]
889	POLR2J3.1	6.63304783860876e-17	-0.309324680020512	0.615	0.367	1.04523567840797e-12	NA
890	MACROH2A1	7.43193175791925e-17	-0.480553621228175	0.933	0.667	1.17112380641291e-12	macroH2A.1 histone [Source:HGNC Symbol;Acc:HGNC:4740]
891	C17orf75	9.57642792542359e-17	-0.311133892159476	0.407	0.282	1.50905351248825e-12	chromosome 17 open reading frame 75 [Source:HGNC Symbol;Acc:HGNC:30173]
892	REC8	1.17345138266425e-16	-0.432220228092224	0.663	0.405	1.84912468880232e-12	REC8 meiotic recombination protein [Source:HGNC Symbol;Acc:HGNC:16879]
893	PCNA	1.18300438851589e-16	-0.322365207540951	0.818	0.498	1.86417831542335e-12	proliferating cell nuclear antigen [Source:HGNC Symbol;Acc:HGNC:8729]
894	H2BC5	1.19811090458679e-16	-0.28064984471689	0.31	0.209	1.88798316344786e-12	H2B clustered histone 5 [Source:HGNC Symbol;Acc:HGNC:4747]
895	COMMD4	2.02351065652053e-16	-0.416492613389293	0.559	0.36	3.18864809254505e-12	COMM domain containing 4 [Source:HGNC Symbol;Acc:HGNC:26027]
896	GEMIN6	2.21944609722814e-16	-0.26738618722496	0.407	0.282	3.4974031600121e-12	gem nuclear organelle associated protein 6 [Source:HGNC Symbol;Acc:HGNC:20044]
897	FANCI	2.25441420866212e-16	-0.343046356022777	0.513	0.34	3.55250591000976e-12	FA complementation group I [Source:HGNC Symbol;Acc:HGNC:25568]
898	MICOS10	4.0385007398095e-16	-0.475580583737858	0.721	0.425	6.36386946579182e-12	mitochondrial contact site and cristae organizing system subunit 10 [Source:HGNC Symbol;Acc:HGNC:32068]
899	MYBPHL	4.06865747630876e-16	-0.265353638906458	0.283	0.194	6.41139045116735e-12	myosin binding protein H like [Source:HGNC Symbol;Acc:HGNC:30434]
900	DPYSL2	4.99234611239384e-16	-0.36748891251633	0.56	0.36	7.86693900391021e-12	dihydropyrimidinase like 2 [Source:HGNC Symbol;Acc:HGNC:3014]
901	KIAA1841	6.17694852052574e-16	-0.294938645892651	0.424	0.295	9.73363547864446e-12	KIAA1841 [Source:HGNC Symbol;Acc:HGNC:29387]
902	NCKAP5	8.04486134478966e-16	-0.309026320281636	0.564	0.36	1.26770925071196e-11	NCK associated protein 5 [Source:HGNC Symbol;Acc:HGNC:29847]
903	CTNNA3	1.00326175251075e-15	-0.346302248953756	0.152	0.229	1.58093986960643e-11	catenin alpha 3 [Source:HGNC Symbol;Acc:HGNC:2511]
904	VRK1	1.24092295429267e-15	-0.320139410437173	0.814	0.483	1.9554463913744e-11	VRK serine/threonine kinase 1 [Source:HGNC Symbol;Acc:HGNC:12718]
905	MRPL20	1.26628080372767e-15	-0.439171070102246	0.586	0.375	1.99540529051407e-11	mitochondrial ribosomal protein L20 [Source:HGNC Symbol;Acc:HGNC:14478]
906	LSM4	1.34302959147156e-15	-0.446125562679119	0.901	0.682	2.11634603024088e-11	LSM4 homolog, U6 small nuclear RNA and mRNA degradation associated [Source:HGNC Symbol;Acc:HGNC:17259]
907	OARD1	1.34632782832074e-15	-0.427524544641277	0.651	0.406	2.12154339186782e-11	O-acyl-ADP-ribose deacylase 1 [Source:HGNC Symbol;Acc:HGNC:21257]
908	DNAAF4	1.64736238975193e-15	-0.275703953025036	0.106	0.18	2.59591365377109e-11	dynein axonemal assembly factor 4 [Source:HGNC Symbol;Acc:HGNC:21493]
909	STUB1	1.66522733540044e-15	-0.351011194716207	0.479	0.317	2.62406523512402e-11	STIP1 homology and U-box containing protein 1 [Source:HGNC Symbol;Acc:HGNC:11427]
910	PRMT1	1.83537023897665e-15	-0.372360419515586	0.872	0.512	2.89217642257941e-11	protein arginine methyltransferase 1 [Source:HGNC Symbol;Acc:HGNC:5187]
911	GCSH	2.44257862035717e-15	-0.329628465191927	0.607	0.382	3.84901538995883e-11	glycine cleavage system protein H [Source:HGNC Symbol;Acc:HGNC:4208]
912	ARHGDIA	2.59568055170261e-15	-0.268267888293449	0.495	0.314	4.09027341337298e-11	Rho GDP dissociation inhibitor alpha [Source:HGNC Symbol;Acc:HGNC:678]
913	ST6GALNAC5	3.35357608717385e-15	-0.655478505280702	0.265	0.321	5.28456519816855e-11	ST6 N-acetylgalactosaminide alpha-2,6-sialyltransferase 5 [Source:HGNC Symbol;Acc:HGNC:19342]
914	MAML2	4.87470887706306e-15	-0.449033401381297	0.581	0.369	7.68156624847597e-11	mastermind like transcriptional coactivator 2 [Source:HGNC Symbol;Acc:HGNC:16259]
915	RNASEH2C	6.53071882068674e-15	-0.460053211929948	0.709	0.435	1.02911067176382e-10	ribonuclease H2 subunit C [Source:HGNC Symbol;Acc:HGNC:24116]
916	BLOC1S1	9.31514606260069e-15	-0.527788958888544	0.8	0.476	1.46788071654462e-10	biogenesis of lysosomal organelles complex 1 subunit 1 [Source:HGNC Symbol;Acc:HGNC:4200]
917	EFCAB2	9.36415323624551e-15	-0.290201624558151	0.435	0.3	1.47560326696757e-10	EF-hand calcium binding domain 2 [Source:HGNC Symbol;Acc:HGNC:28166]
918	PMVK	9.86399748063594e-15	-0.269166167087758	0.441	0.304	1.55436872299861e-10	phosphomevalonate kinase [Source:HGNC Symbol;Acc:HGNC:9141]
919	DDX17	2.78268463888464e-14	-0.330412173034924	0.861	0.491	4.38495445395441e-10	DEAD-box helicase 17 [Source:HGNC Symbol;Acc:HGNC:2740]
920	GPAA1	3.33156002547944e-14	-0.308297769154548	0.469	0.313	5.2498722881505e-10	glycosylphosphatidylinositol anchor attachment 1 [Source:HGNC Symbol;Acc:HGNC:4446]
921	SNRNP25	3.52829960583261e-14	-0.442661554826106	0.569	0.364	5.55989451887102e-10	small nuclear ribonucleoprotein U11/U12 subunit 25 [Source:HGNC Symbol;Acc:HGNC:14161]
922	ENSG00000187186	3.55087791464266e-14	-0.27703031468374	0.351	0.249	5.5954734178939e-10	NA
923	MRPS21	4.25026582873938e-14	-0.317777041816	0.866	0.499	6.69756889292751e-10	mitochondrial ribosomal protein S21 [Source:HGNC Symbol;Acc:HGNC:14046]
924	ATP5F1C	6.04890595182223e-14	-0.339385660327499	0.873	0.515	9.53186599888147e-10	ATP synthase F1 subunit gamma [Source:HGNC Symbol;Acc:HGNC:833]
925	ADD2	8.09870622181547e-14	-0.328777552154899	0.637	0.395	1.27619412643368e-09	adducin 2 [Source:HGNC Symbol;Acc:HGNC:244]
926	MBOAT2	8.39481044255117e-14	-0.253655473170713	0.432	0.297	1.32285422953721e-09	membrane bound O-acyltransferase domain containing 2 [Source:HGNC Symbol;Acc:HGNC:25193]
927	SUGP2	1.12543662435103e-13	-0.382223812662322	0.718	0.44	1.77346303265236e-09	SURP and G-patch domain containing 2 [Source:HGNC Symbol;Acc:HGNC:18641]
928	NFATC2IP	1.2847615280858e-13	-0.320843264539666	0.538	0.352	2.0245272159576e-09	nuclear factor of activated T cells 2 interacting protein [Source:HGNC Symbol;Acc:HGNC:25906]
929	ACLY	1.33593689355299e-13	-0.359405339042882	0.625	0.386	2.10516935686079e-09	ATP citrate lyase [Source:HGNC Symbol;Acc:HGNC:115]
930	RABL6	1.43661658066182e-13	-0.393152273928378	0.718	0.431	2.26382040780689e-09	RAB, member RAS oncogene family like 6 [Source:HGNC Symbol;Acc:HGNC:24703]
931	DAB1	1.63651975226144e-13	-0.261318197082056	0.138	0.21	2.57882782561357e-09	DAB adaptor protein 1 [Source:HGNC Symbol;Acc:HGNC:2661]
932	NDUFA2	1.80809803209092e-13	-0.322386112154893	0.871	0.515	2.84920087896887e-09	NADH:ubiquinone oxidoreductase subunit A2 [Source:HGNC Symbol;Acc:HGNC:7685]
933	FBXO9	2.03249088729322e-13	-0.355656639663238	0.552	0.359	3.20279914019666e-09	F-box protein 9 [Source:HGNC Symbol;Acc:HGNC:13588]
934	ELMOD2	2.0746988202048e-13	-0.277550034878653	0.348	0.254	3.26931040087872e-09	ELMO domain containing 2 [Source:HGNC Symbol;Acc:HGNC:28111]
935	RAB3C	2.15069060000385e-13	-0.290411294035355	0.387	0.278	3.38905824748606e-09	RAB3C, member RAS oncogene family [Source:HGNC Symbol;Acc:HGNC:30269]
936	PPP1R9A	2.9337816501503e-13	-0.267249282684305	0.4	0.285	4.62305312430685e-09	protein phosphatase 1 regulatory subunit 9A [Source:HGNC Symbol;Acc:HGNC:14946]
937	ACAP3	3.4126081993697e-13	-0.268209464889056	0.446	0.305	5.37758800056678e-09	ArfGAP with coiled-coil, ankyrin repeat and PH domains 3 [Source:HGNC Symbol;Acc:HGNC:16754]
938	NDUFAF8	3.72984098104677e-13	-0.373289431572102	0.489	0.332	5.87748341793349e-09	NADH:ubiquinone oxidoreductase complex assembly factor 8 [Source:HGNC Symbol;Acc:HGNC:33551]
939	FADS2	5.76883803579051e-13	-0.357716793459934	0.534	0.347	9.09053497679869e-09	fatty acid desaturase 2 [Source:HGNC Symbol;Acc:HGNC:3575]
940	CENPM	5.84444632321896e-13	-0.254404824804107	0.408	0.287	9.20967851612844e-09	centromere protein M [Source:HGNC Symbol;Acc:HGNC:18352]
941	C1QBP	7.88887360707499e-13	-0.31199427768404	0.864	0.508	1.24312870300288e-08	complement C1q binding protein [Source:HGNC Symbol;Acc:HGNC:1243]
942	MAK	8.1233306017834e-13	-0.549534252202222	0.681	0.421	1.28007443622903e-08	male germ cell associated kinase [Source:HGNC Symbol;Acc:HGNC:6816]
943	VPS28	1.32837227799981e-12	-0.497487444614904	0.567	0.369	2.09324903567211e-08	VPS28 subunit of ESCRT-I [Source:HGNC Symbol;Acc:HGNC:18178]
944	CTXN1	1.88272048683613e-12	-0.322315453800739	0.479	0.311	2.96679094315637e-08	cortexin 1 [Source:HGNC Symbol;Acc:HGNC:31108]
945	IMPG2	2.9722053606809e-12	-0.358366792599639	0.712	0.445	4.68360120736096e-08	interphotoreceptor matrix proteoglycan 2 [Source:HGNC Symbol;Acc:HGNC:18362]
946	EBNA1BP2	3.70656142257574e-12	-0.408553843816825	0.516	0.344	5.84079948969486e-08	EBNA1 binding protein 2 [Source:HGNC Symbol;Acc:HGNC:15531]
947	VPS13C	3.858036600431e-12	-0.258830826804808	0.349	0.263	6.07949407495917e-08	vacuolar protein sorting 13 homolog C [Source:HGNC Symbol;Acc:HGNC:23594]
948	LIG1	5.8805897258949e-12	-0.295195167041406	0.411	0.289	9.26663329006519e-08	DNA ligase 1 [Source:HGNC Symbol;Acc:HGNC:6598]
949	NME4	6.00352364056607e-12	-0.389580197788876	0.566	0.36	9.46035255280402e-08	NME/NM23 nucleoside diphosphate kinase 4 [Source:HGNC Symbol;Acc:HGNC:7852]
950	GOPC	6.6832349220316e-12	-0.300699350276636	0.435	0.305	1.05314415901374e-07	golgi associated PDZ and coiled-coil motif containing [Source:HGNC Symbol;Acc:HGNC:17643]
951	ABHD14A	7.53407232510246e-12	-0.395630646732341	0.568	0.362	1.18721911698965e-07	abhydrolase domain containing 14A [Source:HGNC Symbol;Acc:HGNC:24538]
952	MYH10	8.77085276230581e-12	-0.354196080984539	0.683	0.42	1.38211097828415e-07	myosin heavy chain 10 [Source:HGNC Symbol;Acc:HGNC:7568]
953	LSM6	1.14494788392126e-11	-0.417061969977564	0.543	0.359	1.80420887548312e-07	LSM6 homolog, U6 small nuclear RNA and mRNA degradation associated [Source:HGNC Symbol;Acc:HGNC:17017]
954	PLCG2	1.27081556343071e-11	-2.25504944362523	0.955	0.709	2.00255116485412e-07	phospholipase C gamma 2 [Source:HGNC Symbol;Acc:HGNC:9066]
955	TIMM8B	1.60536465391168e-11	-0.521069700786204	0.659	0.394	2.52973362163403e-07	translocase of inner mitochondrial membrane 8 homolog B [Source:HGNC Symbol;Acc:HGNC:11818]
956	SIPA1L1	1.64901923586722e-11	-0.420245512329344	0.531	0.36	2.59852451187956e-07	signal induced proliferation associated 1 like 1 [Source:HGNC Symbol;Acc:HGNC:20284]
957	CAMKV	1.70648460460556e-11	-0.274719732390425	0.13	0.192	2.68907843993744e-07	CaM kinase like vesicle associated [Source:HGNC Symbol;Acc:HGNC:28788]
958	EID1	1.71452238464151e-11	-0.702029057984982	0.859	0.574	2.7017443737181e-07	EP300 interacting inhibitor of differentiation 1 [Source:HGNC Symbol;Acc:HGNC:1191]
959	H3C10	1.99120493333362e-11	-0.657365716025241	0.124	0.182	3.13774073394712e-07	H3 clustered histone 10 [Source:HGNC Symbol;Acc:HGNC:4775]
960	OTX2	2.61942181257431e-11	-0.291778022204416	0.873	0.512	4.12768489225459e-07	orthodenticle homeobox 2 [Source:HGNC Symbol;Acc:HGNC:8522]
961	NOL4	3.00275319074713e-11	-0.430088211746994	0.674	0.413	4.73173847797933e-07	nucleolar protein 4 [Source:HGNC Symbol;Acc:HGNC:7870]
962	C19orf25	3.10146884154933e-11	-0.266821715727025	0.457	0.323	4.88729460051343e-07	chromosome 19 open reading frame 25 [Source:HGNC Symbol;Acc:HGNC:26711]
963	PGLS	3.16494770028667e-11	-0.434164106676322	0.573	0.37	4.98732458611173e-07	6-phosphogluconolactonase [Source:HGNC Symbol;Acc:HGNC:8903]
964	H2BC13	3.48842262218883e-11	-0.384006168957304	0.09	0.143	5.49705636804516e-07	H2B clustered histone 13 [Source:HGNC Symbol;Acc:HGNC:4748]
965	MCRIP1	3.72143289723892e-11	-0.455662641314192	0.555	0.365	5.86423395946908e-07	MAPK regulated corepressor interacting protein 1 [Source:HGNC Symbol;Acc:HGNC:28007]
966	HSPE1	3.78501565998001e-11	-0.552413577161617	0.9	0.638	5.9644276769965e-07	heat shock protein family E (Hsp10) member 1 [Source:HGNC Symbol;Acc:HGNC:5269]
967	NDUFB3	4.3465484354314e-11	-0.60333332876349	0.775	0.479	6.8492910245528e-07	NADH:ubiquinone oxidoreductase subunit B3 [Source:HGNC Symbol;Acc:HGNC:7698]
968	PPFIA2	4.68695912123749e-11	-0.30848810756069	0.454	0.323	7.38571018324604e-07	PTPRF interacting protein alpha 2 [Source:HGNC Symbol;Acc:HGNC:9246]
969	SOX12	4.71826169179444e-11	-0.298982601945762	0.483	0.33	7.43503677392967e-07	SRY-box transcription factor 12 [Source:HGNC Symbol;Acc:HGNC:11198]
970	FAAP20	5.24928382624173e-11	-0.510627475849826	0.649	0.403	8.27182145339172e-07	FA core complex associated protein 20 [Source:HGNC Symbol;Acc:HGNC:26428]
971	SLC44A1	5.34369841027972e-11	-0.546914508993154	0.93	0.614	8.42059995491878e-07	solute carrier family 44 member 1 [Source:HGNC Symbol;Acc:HGNC:18798]
972	ANKRD36C	5.52102098831449e-11	-0.412369376015226	0.397	0.3	8.70002487338597e-07	ankyrin repeat domain 36C [Source:HGNC Symbol;Acc:HGNC:32946]
973	GPR180	7.97942508864443e-11	-0.344214878875414	0.594	0.395	1.25739780546859e-06	G protein-coupled receptor 180 [Source:HGNC Symbol;Acc:HGNC:28899]
974	BORCS8	8.36141874704614e-11	-0.300468596737161	0.37	0.271	1.31759236615953e-06	BLOC-1 related complex subunit 8 [Source:HGNC Symbol;Acc:HGNC:37247]
975	GTPBP2	8.4629636691471e-11	-0.255383425369596	0.343	0.254	1.3335938149842e-06	GTP binding protein 2 [Source:HGNC Symbol;Acc:HGNC:4670]
976	PDCD5	9.06651112691177e-11	-0.520606103964186	0.834	0.494	1.42870082337876e-06	programmed cell death 5 [Source:HGNC Symbol;Acc:HGNC:8764]
977	REX1BD	1.04507127573294e-10	-0.444871273592742	0.555	0.374	1.64682331629996e-06	required for excision 1-B domain containing [Source:HGNC Symbol;Acc:HGNC:26098]
978	NDUFC2	1.2259744233494e-10	-0.299335057157041	0.882	0.548	1.93189049631399e-06	NADH:ubiquinone oxidoreductase subunit C2 [Source:HGNC Symbol;Acc:HGNC:7706]
979	AKR1B1	1.22808089756174e-10	-0.393767548450416	0.54	0.352	1.93520987837779e-06	aldo-keto reductase family 1 member B [Source:HGNC Symbol;Acc:HGNC:381]
980	UCP2	1.32801735619619e-10	-0.394408202794543	0.564	0.373	2.09268974989396e-06	uncoupling protein 2 [Source:HGNC Symbol;Acc:HGNC:12518]
981	NCOR2	1.66149436902086e-10	-0.284798384530942	0.489	0.336	2.61818282670308e-06	nuclear receptor corepressor 2 [Source:HGNC Symbol;Acc:HGNC:7673]
982	HMGN3	1.78434284043854e-10	-0.492561047934835	0.724	0.438	2.81176744796305e-06	high mobility group nucleosomal binding domain 3 [Source:HGNC Symbol;Acc:HGNC:12312]
983	TTN	1.8249987105577e-10	-0.596453706448625	0.237	0.296	2.87583296809682e-06	titin [Source:HGNC Symbol;Acc:HGNC:12403]
984	GPSM1	2.2052945407893e-10	-0.326461664647552	0.425	0.296	3.47510313737579e-06	G protein signaling modulator 1 [Source:HGNC Symbol;Acc:HGNC:17858]
985	GABBR2	2.7587254586103e-10	-0.3335431208538	0.484	0.33	4.34719957767812e-06	gamma-aminobutyric acid type B receptor subunit 2 [Source:HGNC Symbol;Acc:HGNC:4507]
986	FAM89B	3.12564353156429e-10	-0.30743563102991	0.411	0.291	4.92538907703901e-06	family with sequence similarity 89 member B [Source:HGNC Symbol;Acc:HGNC:16708]
987	ZBTB8OS	3.72617230701774e-10	-0.411549177163312	0.5	0.353	5.87170232139856e-06	zinc finger and BTB domain containing 8 opposite strand [Source:HGNC Symbol;Acc:HGNC:24094]
988	SEMA6B	3.82173760957919e-10	-0.286843079048027	0.463	0.322	6.02229412517488e-06	semaphorin 6B [Source:HGNC Symbol;Acc:HGNC:10739]
989	EIF4EBP2	3.91873480008992e-10	-0.252448448617645	0.454	0.317	6.17514229798169e-06	eukaryotic translation initiation factor 4E binding protein 2 [Source:HGNC Symbol;Acc:HGNC:3289]
990	CYHR1	4.79232438259979e-10	-0.264471238167497	0.385	0.278	7.55174476210075e-06	cysteine and histidine rich 1 [Source:HGNC Symbol;Acc:HGNC:17806]
991	SMIM19	5.20471398276436e-10	-0.283321401712684	0.391	0.287	8.20158829404008e-06	small integral membrane protein 19 [Source:HGNC Symbol;Acc:HGNC:25166]
992	BCL11B	6.07763076132444e-10	-0.295875633066681	0.46	0.332	9.57713055369505e-06	BAF chromatin remodeling complex subunit BCL11B [Source:HGNC Symbol;Acc:HGNC:13222]
993	CBX3	6.67154880813608e-10	-0.472429549265713	0.931	0.639	1.05130266118608e-05	chromobox 3 [Source:HGNC Symbol;Acc:HGNC:1553]
994	ZDHHC12	9.08514611546785e-10	-0.272823447385411	0.372	0.273	1.43163732487542e-05	zinc finger DHHC-type palmitoyltransferase 12 [Source:HGNC Symbol;Acc:HGNC:19159]
995	SRP9	1.07428742416191e-09	-0.536150046425399	0.896	0.615	1.69286212299433e-05	signal recognition particle 9 [Source:HGNC Symbol;Acc:HGNC:11304]
996	PRDX1	1.09781727175433e-09	-0.618500183602861	0.885	0.628	1.72994045683048e-05	peroxiredoxin 1 [Source:HGNC Symbol;Acc:HGNC:9352]
997	PTTG1	1.56397382178563e-09	-0.300136727661816	0.893	0.684	2.4645099483698e-05	PTTG1 regulator of sister chromatid separation, securin [Source:HGNC Symbol;Acc:HGNC:9690]
998	MOSMO	1.66344115631511e-09	-0.281545906760513	0.153	0.209	2.62125057412135e-05	modulator of smoothened [Source:HGNC Symbol;Acc:HGNC:27087]
999	SLC12A2	1.84074106259983e-09	-0.666638469914872	0.3	0.325	2.90063976644482e-05	solute carrier family 12 member 2 [Source:HGNC Symbol;Acc:HGNC:10911]
1000	CRMP1	1.9159237509927e-09	-0.410641507451575	0.535	0.354	3.01911264681429e-05	collapsin response mediator protein 1 [Source:HGNC Symbol;Acc:HGNC:2365]
1001	ATP5MJ	1.92580554990004e-09	-0.265659012710952	0.903	0.597	3.03468438553248e-05	NA
1002	PCLAF	2.348045326063e-09	-0.449810513604558	0.51	0.357	3.70004982481008e-05	PCNA clamp associated factor [Source:HGNC Symbol;Acc:HGNC:28961]
1003	RIMS2	3.4841422051958e-09	-0.307153233860399	0.441	0.319	5.49031128694755e-05	regulating synaptic membrane exocytosis 2 [Source:HGNC Symbol;Acc:HGNC:17283]
1004	ABCF1	3.5993869663704e-09	-0.429544710129704	0.798	0.483	5.67191398160647e-05	ATP binding cassette subfamily F member 1 [Source:HGNC Symbol;Acc:HGNC:70]
1005	CADM1	3.68215516564989e-09	-0.250429578257014	0.408	0.297	5.80234011003109e-05	cell adhesion molecule 1 [Source:HGNC Symbol;Acc:HGNC:5951]
1006	CHGA	4.11762419960647e-09	-0.346862894131703	0.531	0.363	6.48855221373988e-05	chromogranin A [Source:HGNC Symbol;Acc:HGNC:1929]
1007	ITGB1BP1	5.07060889356251e-09	-0.448293519577495	0.694	0.434	7.9902654944758e-05	integrin subunit beta 1 binding protein 1 [Source:HGNC Symbol;Acc:HGNC:23927]
1008	H2AC15	5.0827824699349e-09	-0.749202106555444	0.255	0.3	8.00944861612342e-05	H2A clustered histone 15 [Source:HGNC Symbol;Acc:HGNC:4726]
1009	C11orf58	8.00622062699276e-09	-0.366791231396466	0.795	0.494	0.000126162024640152	chromosome 11 open reading frame 58 [Source:HGNC Symbol;Acc:HGNC:16990]
1010	ELP6	1.06858558707668e-08	-0.326510248504486	0.408	0.303	0.000168387716811543	elongator acetyltransferase complex subunit 6 [Source:HGNC Symbol;Acc:HGNC:25976]
1011	GPC6	1.07712146442581e-08	-0.44667996777853	0.479	0.345	0.000169732800364219	glypican 6 [Source:HGNC Symbol;Acc:HGNC:4454]
1012	PCBP4	1.25666573221482e-08	-0.632800381869505	0.904	0.6	0.000198025386082411	poly(rC) binding protein 4 [Source:HGNC Symbol;Acc:HGNC:8652]
1013	KIAA1614	1.61025409374383e-08	-0.557736148906031	0.341	0.344	0.000253743840092153	KIAA1614 [Source:HGNC Symbol;Acc:HGNC:29327]
1014	LMO3	1.91863511972768e-08	-0.274159662873233	0.891	0.534	0.000302338522166688	LIM domain only 3 [Source:HGNC Symbol;Acc:HGNC:6643]
1015	BCL2L1	2.10459355544726e-08	-0.522948181113394	0.711	0.43	0.00033164185246738	BCL2 like 1 [Source:HGNC Symbol;Acc:HGNC:992]
1016	NREP	2.40117812280083e-08	-0.430051604102472	0.739	0.439	0.000378377648590955	neuronal regeneration related protein [Source:HGNC Symbol;Acc:HGNC:16834]
1017	TP53I11	3.59040842865346e-08	-0.426478184220084	0.555	0.359	0.000565776560187212	tumor protein p53 inducible protein 11 [Source:HGNC Symbol;Acc:HGNC:16842]
1018	ANAPC7	3.8240444049449e-08	-0.276090644465503	0.409	0.302	0.000602592917331218	anaphase promoting complex subunit 7 [Source:HGNC Symbol;Acc:HGNC:17380]
1019	SSBP4	4.21819434233525e-08	-0.572691153008138	0.726	0.448	0.000664703064465188	single stranded DNA binding protein 4 [Source:HGNC Symbol;Acc:HGNC:15676]
1020	RD3	4.30529074081374e-08	-0.34922666899105	0.244	0.285	0.000678427714937429	retinal degeneration 3, GUCY2D regulator [Source:HGNC Symbol;Acc:HGNC:19689]
1021	CHMP3	4.3084133124364e-08	-0.365606270249966	0.403	0.297	0.000678919769773727	charged multivesicular body protein 3 [Source:HGNC Symbol;Acc:HGNC:29865]
1022	TANC1	4.58340549287997e-08	-0.268242829164611	0.383	0.288	0.000722253037568025	tetratricopeptide repeat, ankyrin repeat and coiled-coil containing 1 [Source:HGNC Symbol;Acc:HGNC:29364]
1023	DNPH1	4.65734405486074e-08	-0.485093512033327	0.608	0.406	0.000733904276164956	2'-deoxynucleoside 5'-phosphate N-hydrolase 1 [Source:HGNC Symbol;Acc:HGNC:21218]
1024	HMGB3	6.06378057522372e-08	-0.542825279058238	0.736	0.464	0.000955530543043754	high mobility group box 3 [Source:HGNC Symbol;Acc:HGNC:5004]
1025	ENSG00000269825	6.65149451271697e-08	-0.260784659429115	0.144	0.198	0.00104814250531394	NA
1026	EIF3K	7.23818069667959e-08	-0.321459088372047	0.884	0.554	0.00114059251418277	eukaryotic translation initiation factor 3 subunit K [Source:HGNC Symbol;Acc:HGNC:24656]
1027	ARHGEF9	7.8204836257043e-08	-0.495654474703539	0.629	0.404	0.00123235180973848	Cdc42 guanine nucleotide exchange factor 9 [Source:HGNC Symbol;Acc:HGNC:14561]
1028	PWWP3A	8.45500757144662e-08	-0.368800238770621	0.499	0.351	0.00133234009310856	PWWP domain containing 3A, DNA repair factor [Source:HGNC Symbol;Acc:HGNC:29641]
1029	HNRNPD	1.07974121492428e-07	-0.433349547371941	0.931	0.624	0.00170145620647768	heterogeneous nuclear ribonucleoprotein D [Source:HGNC Symbol;Acc:HGNC:5036]
1030	RUVBL1	1.18823389928264e-07	-0.405439986723208	0.467	0.334	0.00187241897848959	RuvB like AAA ATPase 1 [Source:HGNC Symbol;Acc:HGNC:10474]
1031	DACH1	1.24512239966538e-07	-0.360214541847359	0.576	0.38	0.0019620638773927	dachshund family transcription factor 1 [Source:HGNC Symbol;Acc:HGNC:2663]
1032	MT-ND6	1.74167009704224e-07	-0.571691040781647	0.814	0.51	0.00274452373891915	mitochondrially encoded NADH:ubiquinone oxidoreductase core subunit 6 [Source:HGNC Symbol;Acc:HGNC:7462]
1033	NDUFB4	1.79005213569561e-07	-0.2686098066658	0.899	0.597	0.00282076415542914	NADH:ubiquinone oxidoreductase subunit B4 [Source:HGNC Symbol;Acc:HGNC:7699]
1034	SMARCA4	1.84698955341551e-07	-0.395738120781534	0.765	0.452	0.00291048613827217	SWI/SNF related, matrix associated, actin dependent regulator of chromatin, subfamily a, member 4 [Source:HGNC Symbol;Acc:HGNC:11100]
1035	MRPS18A	1.97529674395712e-07	-0.344130228070128	0.4	0.301	0.00311267260912763	mitochondrial ribosomal protein S18A [Source:HGNC Symbol;Acc:HGNC:14515]
1036	GNB3	2.26274343244886e-07	-0.421203407368767	0.866	0.637	0.00356563110085291	G protein subunit beta 3 [Source:HGNC Symbol;Acc:HGNC:4400]
1037	NEUROD4	2.43012157145965e-07	-0.46239640047311	0.569	0.389	0.00382938557230612	neuronal differentiation 4 [Source:HGNC Symbol;Acc:HGNC:13802]
1038	GSTA4	2.8424765184603e-07	-0.26567290853122	0.361	0.274	0.00447917449778974	glutathione S-transferase alpha 4 [Source:HGNC Symbol;Acc:HGNC:4629]
1039	PCP2	3.07278071245884e-07	-0.311353658734832	0.435	0.325	0.00484208784669264	Purkinje cell protein 2 [Source:HGNC Symbol;Acc:HGNC:30209]
1040	MRPL23	3.3131181817456e-07	-0.646085387606256	0.664	0.423	0.00522081163079472	mitochondrial ribosomal protein L23 [Source:HGNC Symbol;Acc:HGNC:10322]
1041	UBE2T	3.35655878655672e-07	-0.34201911678164	0.806	0.542	0.00528926533585608	ubiquitin conjugating enzyme E2 T [Source:HGNC Symbol;Acc:HGNC:25009]
1042	PCNX4	3.68595793185984e-07	-0.291111300022313	0.467	0.342	0.00580833250902474	pecanex 4 [Source:HGNC Symbol;Acc:HGNC:20349]
1043	RPS6KL1	3.78085469785093e-07	-0.265626920106042	0.302	0.234	0.00595787083287349	ribosomal protein S6 kinase like 1 [Source:HGNC Symbol;Acc:HGNC:20222]
1044	PALMD	4.13794023515286e-07	-0.876388263668219	0.665	0.502	0.00652056622255387	palmdelphin [Source:HGNC Symbol;Acc:HGNC:15846]
1045	PLEKHO1	4.56456757530985e-07	-0.364259683971466	0.43	0.315	0.00719284558517326	pleckstrin homology domain containing O1 [Source:HGNC Symbol;Acc:HGNC:24310]
1046	ZNF681	5.34637353021997e-07	-0.269896997570073	0.311	0.249	0.00842481540892063	zinc finger protein 681 [Source:HGNC Symbol;Acc:HGNC:26457]
1047	PIN4	6.19364875284963e-07	-0.552583979827037	0.611	0.411	0.00975995170474045	peptidylprolyl cis/trans isomerase, NIMA-interacting 4 [Source:HGNC Symbol;Acc:HGNC:8992]
1048	ENDOG	9.07757168378307e-07	-0.873390711513362	0.482	0.429	0.0143044374593054	endonuclease G [Source:HGNC Symbol;Acc:HGNC:3346]
1049	BCL11A	1.02892096299968e-06	-0.442545485607162	0.618	0.39	0.0162137365349489	BAF chromatin remodeling complex subunit BCL11A [Source:HGNC Symbol;Acc:HGNC:13221]
1050	MCC	1.04296342324582e-06	-0.452302391843829	0.666	0.426	0.0164350176235076	MCC regulator of WNT signaling pathway [Source:HGNC Symbol;Acc:HGNC:6935]
1051	CACNA2D1	1.40407498133013e-06	-0.487101227299135	0.525	0.38	0.0221254135558002	calcium voltage-gated channel auxiliary subunit alpha2delta 1 [Source:HGNC Symbol;Acc:HGNC:1399]
1052	CHRNA3	1.46478912139599e-06	-0.380594739783448	0.485	0.337	0.023082146974958	cholinergic receptor nicotinic alpha 3 subunit [Source:HGNC Symbol;Acc:HGNC:1957]
1053	MBD3	1.77774543693841e-06	-0.339599588385458	0.384	0.289	0.0280137125952755	methyl-CpG binding domain protein 3 [Source:HGNC Symbol;Acc:HGNC:6918]
1054	PRL	1.87542506126063e-06	-0.817927326921294	0.692	0.516	0.029552948115345	prolactin [Source:HGNC Symbol;Acc:HGNC:9445]
1055	ESRRG	2.44715687367169e-06	-0.458439503047267	0.562	0.385	0.0385622980153184	estrogen related receptor gamma [Source:HGNC Symbol;Acc:HGNC:3474]
1056	MARCKSL1	2.64729756616406e-06	-0.375339971925645	0.843	0.494	0.0417161150476132	MARCKS like 1 [Source:HGNC Symbol;Acc:HGNC:7142]
1057	FAM161A	2.9847739958089e-06	-0.45814157060361	0.781	0.47	0.0470340686259567	FAM161 centrosomal protein A [Source:HGNC Symbol;Acc:HGNC:25808]
1058	ZNF302	3.28554749186506e-06	-0.346680856202141	0.448	0.337	0.0517736573768095	zinc finger protein 302 [Source:HGNC Symbol;Acc:HGNC:13848]
1059	EYA2	4.311520198974e-06	-0.381030147014568	0.465	0.331	0.0679409352954323	EYA transcriptional coactivator and phosphatase 2 [Source:HGNC Symbol;Acc:HGNC:3520]
1060	ZNF462	4.49812755042128e-06	-0.271774118563155	0.424	0.317	0.0708814939395386	zinc finger protein 462 [Source:HGNC Symbol;Acc:HGNC:21684]
1061	NT5DC2	4.72815841599228e-06	-0.49740729361885	0.687	0.446	0.0745063203192063	5'-nucleotidase domain containing 2 [Source:HGNC Symbol;Acc:HGNC:25717]
1062	FKBP5	8.07982913503973e-06	-0.390346605969923	0.502	0.353	0.127321947509956	FKBP prolyl isomerase 5 [Source:HGNC Symbol;Acc:HGNC:3721]
1063	MAP2	1.40600128484648e-05	-0.284661122477265	0.197	0.238	0.221557682466108	microtubule associated protein 2 [Source:HGNC Symbol;Acc:HGNC:6839]
1064	IFT22	1.46338667799985e-05	-0.281024549849967	0.372	0.285	0.230600472719216	intraflagellar transport 22 [Source:HGNC Symbol;Acc:HGNC:21895]
1065	SPAG16	1.57995312908889e-05	-0.481856136628361	0.463	0.344	0.248969014081827	sperm associated antigen 16 [Source:HGNC Symbol;Acc:HGNC:23225]
1066	ABL2	1.59588582799074e-05	-0.470320966810523	0.662	0.418	0.25147968877478	ABL proto-oncogene 2, non-receptor tyrosine kinase [Source:HGNC Symbol;Acc:HGNC:77]
1067	AGL	1.60844820348515e-05	-0.931674450393479	0.718	0.499	0.25345926790519	amylo-alpha-1, 6-glucosidase, 4-alpha-glucanotransferase [Source:HGNC Symbol;Acc:HGNC:321]
1068	HMGB2	1.90658849284948e-05	0.324083812459412	0.978	0.8	0.300440214703222	high mobility group box 2 [Source:HGNC Symbol;Acc:HGNC:5000]
1069	CNTN1	1.90900020941583e-05	-0.324170630549249	0.385	0.296	0.300820252999747	contactin 1 [Source:HGNC Symbol;Acc:HGNC:2171]
1070	IGF2BP3	2.1175276250292e-05	-0.320326254626611	0.443	0.34	0.333680003152102	insulin like growth factor 2 mRNA binding protein 3 [Source:HGNC Symbol;Acc:HGNC:28868]
1071	PCP4	2.83719765217213e-05	-0.561935827254842	0.123	0.158	0.447085606029284	Purkinje cell protein 4 [Source:HGNC Symbol;Acc:HGNC:8742]
1072	AUTS2	2.87107893380285e-05	-0.431824869698403	0.26	0.285	0.452424618388653	activator of transcription and developmental regulator AUTS2 [Source:HGNC Symbol;Acc:HGNC:14262]
1073	MMAB	3.36697150146789e-05	-0.384549197574541	0.406	0.304	0.53056736920131	metabolism of cobalamin associated B [Source:HGNC Symbol;Acc:HGNC:19331]
1074	CREB1	3.81271666467393e-05	-0.352601177866691	0.42	0.326	0.600807892019319	cAMP responsive element binding protein 1 [Source:HGNC Symbol;Acc:HGNC:2345]
1075	PEX5L	3.83961215111008e-05	-0.267603253061052	0.384	0.306	0.605046082771926	peroxisomal biogenesis factor 5 like [Source:HGNC Symbol;Acc:HGNC:30024]
1076	RPL7L1	4.08148075631705e-05	-0.369423636286302	0.848	0.517	0.643159737580441	ribosomal protein L7 like 1 [Source:HGNC Symbol;Acc:HGNC:21370]
1077	PIN1	4.58664656774184e-05	-0.402492802743737	0.837	0.525	0.722763766144759	peptidylprolyl cis/trans isomerase, NIMA-interacting 1 [Source:HGNC Symbol;Acc:HGNC:8988]
1078	HOOK2	5.16571583950716e-05	-0.262754379657656	0.331	0.266	0.814013501989538	hook microtubule tethering protein 2 [Source:HGNC Symbol;Acc:HGNC:19885]
1079	HERC2	6.70290573201079e-05	-0.355704044839552	0.43	0.33	1	HECT and RLD domain containing E3 ubiquitin protein ligase 2 [Source:HGNC Symbol;Acc:HGNC:4868]
1080	PRDM1	7.13139591233992e-05	-0.415332636112727	0.474	0.34	1	PR/SET domain 1 [Source:HGNC Symbol;Acc:HGNC:9346]
1081	UROS	0.000103585057324207	-0.310103768830261	0.185	0.224	1	uroporphyrinogen III synthase [Source:HGNC Symbol;Acc:HGNC:12592]
1082	CCDC141	0.00013186009720934	-0.346830686476288	0.226	0.259	1	coiled-coil domain containing 141 [Source:HGNC Symbol;Acc:HGNC:26821]
1083	LRRTM2	0.000137208969795837	-0.25591608125984	0.199	0.239	1	leucine rich repeat transmembrane neuronal 2 [Source:HGNC Symbol;Acc:HGNC:19409]
1084	DHFR	0.000154267815077028	-0.415642861238832	0.466	0.337	1	dihydrofolate reductase [Source:HGNC Symbol;Acc:HGNC:2861]
1085	DPYSL5	0.000165508110594141	-0.354156946231392	0.408	0.301	1	dihydropyrimidinase like 5 [Source:HGNC Symbol;Acc:HGNC:20637]
1086	MDGA1	0.0001803120683865	-0.574815309962609	0.361	0.355	1	MAM domain containing glycosylphosphatidylinositol anchor 1 [Source:HGNC Symbol;Acc:HGNC:19267]
1087	PSMG4	0.000236348377360432	-0.531740319942076	0.553	0.395	1	proteasome assembly chaperone 4 [Source:HGNC Symbol;Acc:HGNC:21108]
1088	DCLRE1C	0.000237690962841652	-0.287485046847051	0.348	0.282	1	DNA cross-link repair 1C [Source:HGNC Symbol;Acc:HGNC:17642]
1089	ATP5ME	0.000246913272312467	-0.448879432167501	0.891	0.58	1	ATP synthase membrane subunit e [Source:HGNC Symbol;Acc:HGNC:846]
1090	H2AC6	0.000253400938620494	-0.979664698900206	0.447	0.416	1	H2A clustered histone 6 [Source:HGNC Symbol;Acc:HGNC:4733]
1091	GNG11	0.000266080146110884	-0.262761835167628	0.313	0.259	1	G protein subunit gamma 11 [Source:HGNC Symbol;Acc:HGNC:4403]
1092	MYBL2	0.00026797383058778	-0.319027610591159	0.345	0.266	1	MYB proto-oncogene like 2 [Source:HGNC Symbol;Acc:HGNC:7548]
1093	H2BC7	0.000269515982131427	-0.471070301883855	0.116	0.145	1	H2B clustered histone 7 [Source:HGNC Symbol;Acc:HGNC:4752]
1094	ISOC1	0.000270630078838081	-0.437813166697264	0.841	0.52	1	isochorismatase domain containing 1 [Source:HGNC Symbol;Acc:HGNC:24254]
1095	NDUFA11	0.000271701961484112	-0.611139029539445	0.869	0.594	1	NADH:ubiquinone oxidoreductase subunit A11 [Source:HGNC Symbol;Acc:HGNC:20371]
1096	MEX3A	0.000274635872253202	-0.318325506164024	0.453	0.332	1	mex-3 RNA binding family member A [Source:HGNC Symbol;Acc:HGNC:33482]
1097	UQCR10	0.00031438856114381	-0.350342729057748	0.881	0.575	1	ubiquinol-cytochrome c reductase, complex III subunit X [Source:HGNC Symbol;Acc:HGNC:30863]
1098	CETN3	0.000351069454592015	-0.257106407806751	0.286	0.243	1	centrin 3 [Source:HGNC Symbol;Acc:HGNC:1868]
1099	ASTN2	0.000364756264824147	-0.340193081992713	0.381	0.295	1	astrotactin 2 [Source:HGNC Symbol;Acc:HGNC:17021]
1100	PROM1	0.000492709300590716	-0.375416160104078	0.413	0.326	1	prominin 1 [Source:HGNC Symbol;Acc:HGNC:9454]
1101	ZNF730	0.000595127043173684	-0.365599140705259	0.41	0.331	1	zinc finger protein 730 [Source:HGNC Symbol;Acc:HGNC:32470]
1102	PIP5K1C	0.000614378866562262	-0.277141784166272	0.361	0.29	1	phosphatidylinositol-4-phosphate 5-kinase type 1 gamma [Source:HGNC Symbol;Acc:HGNC:8996]
1103	CBX5	0.000824615416725243	-0.678921007446372	0.789	0.539	1	chromobox 5 [Source:HGNC Symbol;Acc:HGNC:1555]
1104	NUP188	0.000852689815533086	-0.334586856091622	0.366	0.289	1	nucleoporin 188 [Source:HGNC Symbol;Acc:HGNC:17859]
1105	PRTFDC1	0.000874852846316319	-0.286575431955161	0.301	0.251	1	phosphoribosyl transferase domain containing 1 [Source:HGNC Symbol;Acc:HGNC:23333]
1106	CENPA	0.000931936838421612	-0.285805584692433	0.203	0.236	1	centromere protein A [Source:HGNC Symbol;Acc:HGNC:1851]
1107	TULP1	0.0010609404075825	-0.475473239083516	0.801	0.498	1	TUB like protein 1 [Source:HGNC Symbol;Acc:HGNC:12423]
1108	ERH	0.00108038213791624	-0.353286901254646	0.893	0.574	1	ERH mRNA splicing and mitosis factor [Source:HGNC Symbol;Acc:HGNC:3447]
1109	SPC25	0.00115641322353817	-0.559987107090523	0.281	0.296	1	SPC25 component of NDC80 kinetochore complex [Source:HGNC Symbol;Acc:HGNC:24031]
1110	PKN3	0.00126552216170987	-0.27896224681314	0.139	0.172	1	protein kinase N3 [Source:HGNC Symbol;Acc:HGNC:17999]
1111	DLL3	0.00138963631942814	-0.30360836301022	0.37	0.288	1	delta like canonical Notch ligand 3 [Source:HGNC Symbol;Acc:HGNC:2909]
1112	ATP5F1D	0.001565071005422	-0.437298646869266	0.876	0.542	1	ATP synthase F1 subunit delta [Source:HGNC Symbol;Acc:HGNC:837]
1113	KNSTRN	0.00164970754238726	-0.318026359235566	0.373	0.305	1	kinetochore localized astrin (SPAG5) binding protein [Source:HGNC Symbol;Acc:HGNC:30767]
1114	RAPGEF5	0.00168943492059819	-0.354520321358349	0.367	0.304	1	Rap guanine nucleotide exchange factor 5 [Source:HGNC Symbol;Acc:HGNC:16862]
1115	CACNA1F	0.00172280495143662	-0.251610490401382	0.261	0.224	1	calcium voltage-gated channel subunit alpha1 F [Source:HGNC Symbol;Acc:HGNC:1393]
1116	ZNF66	0.00185403377521261	-0.370063694828176	0.252	0.279	1	zinc finger protein 66 [Source:HGNC Symbol;Acc:HGNC:13135]
1117	MED7	0.00186159963569595	-0.400097286771967	0.349	0.29	1	mediator complex subunit 7 [Source:HGNC Symbol;Acc:HGNC:2378]
1118	DYNC2I2	0.00200540351430382	-0.796171745725113	0.543	0.433	1	dynein 2 intermediate chain 2 [Source:HGNC Symbol;Acc:HGNC:28296]
1119	QSOX1	0.0020560172654953	-0.368648702995217	0.394	0.305	1	quiescin sulfhydryl oxidase 1 [Source:HGNC Symbol;Acc:HGNC:9756]
1120	DPYSL4	0.00210260615106868	-0.332804915035108	0.34	0.275	1	dihydropyrimidinase like 4 [Source:HGNC Symbol;Acc:HGNC:3016]
1121	CUL9	0.00246927854068197	-0.271466316909902	0.214	0.185	1	cullin 9 [Source:HGNC Symbol;Acc:HGNC:15982]
1122	MARCHF1	0.00350870726348318	-0.382368012516033	0.275	0.29	1	membrane associated ring-CH-type finger 1 [Source:HGNC Symbol;Acc:HGNC:26077]
1123	COX6C	0.00367452128508027	-0.400053856575171	0.901	0.645	1	cytochrome c oxidase subunit 6C [Source:HGNC Symbol;Acc:HGNC:2285]
1124	CDK14	0.00373782176201823	-0.253159372959829	0.259	0.229	1	cyclin dependent kinase 14 [Source:HGNC Symbol;Acc:HGNC:8883]
1125	ZNF85	0.00436150200497496	-0.277633503188054	0.274	0.239	1	zinc finger protein 85 [Source:HGNC Symbol;Acc:HGNC:13160]
1126	DCT	0.00465674958209091	-0.506427786101623	0.916	0.616	1	dopachrome tautomerase [Source:HGNC Symbol;Acc:HGNC:2709]
1127	CDC45	0.00497337192720599	-0.32167212281197	0.261	0.227	1	cell division cycle 45 [Source:HGNC Symbol;Acc:HGNC:1739]
1128	PACSIN1	0.00516082982024759	-0.352641318074333	0.362	0.29	1	protein kinase C and casein kinase substrate in neurons 1 [Source:HGNC Symbol;Acc:HGNC:8570]
1129	APOLD1	0.00587976643033627	-0.400049161607423	0.138	0.163	1	apolipoprotein L domain containing 1 [Source:HGNC Symbol;Acc:HGNC:25268]
1130	TCF19	0.00669026929754887	-0.353028724666093	0.369	0.298	1	transcription factor 19 [Source:HGNC Symbol;Acc:HGNC:11629]
1131	RBFOX2	0.00733935690769901	-0.394842247420872	0.268	0.28	1	RNA binding fox-1 homolog 2 [Source:HGNC Symbol;Acc:HGNC:9906]
1132	UQCR11	0.00784340099874088	-0.48377677469652	0.814	0.527	1	ubiquinol-cytochrome c reductase, complex III subunit XI [Source:HGNC Symbol;Acc:HGNC:30862]
1133	ACAT2	0.00785640882193003	-0.297568941845804	0.86	0.584	1	acetyl-CoA acetyltransferase 2 [Source:HGNC Symbol;Acc:HGNC:94]
1134	EYS	0.00924580627524164	-0.905852616681237	0.432	0.388	1	eyes shut homolog [Source:HGNC Symbol;Acc:HGNC:21555]
1135	TPGS1	0.0103527333152982	-0.407972809164195	0.368	0.297	1	tubulin polyglutamylase complex subunit 1 [Source:HGNC Symbol;Acc:HGNC:25058]
1136	KNTC1	0.0106974198231727	-0.372998863012959	0.339	0.292	1	kinetochore associated 1 [Source:HGNC Symbol;Acc:HGNC:17255]
1137	PDE6B	0.0107861353904909	-0.322322834911479	0.251	0.266	1	phosphodiesterase 6B [Source:HGNC Symbol;Acc:HGNC:8786]
1138	DST	0.0108725913464115	-0.648823511782677	0.891	0.607	1	dystonin [Source:HGNC Symbol;Acc:HGNC:1090]
1139	HOMER3	0.0124224382175297	-0.705510183556157	0.622	0.423	1	homer scaffold protein 3 [Source:HGNC Symbol;Acc:HGNC:17514]
1140	SEZ6	0.0140552237276415	-0.327712411989367	0.352	0.284	1	seizure related 6 homolog [Source:HGNC Symbol;Acc:HGNC:15955]
1141	NDUFB11	0.0146311491352976	-0.338943471671808	0.911	0.658	1	NADH:ubiquinone oxidoreductase subunit B11 [Source:HGNC Symbol;Acc:HGNC:20372]
1142	SPDL1	0.0147873560321576	-0.408581573101064	0.248	0.267	1	spindle apparatus coiled-coil protein 1 [Source:HGNC Symbol;Acc:HGNC:26010]
1143	SRSF9	0.0162411343349423	-0.477461491880967	0.864	0.535	1	serine and arginine rich splicing factor 9 [Source:HGNC Symbol;Acc:HGNC:10791]
1144	SNRPF	0.0165122935196333	-0.34940977659056	0.899	0.581	1	small nuclear ribonucleoprotein polypeptide F [Source:HGNC Symbol;Acc:HGNC:11162]
1145	XRCC5	0.0168264236707915	-0.319761356698011	0.896	0.57	1	X-ray repair cross complementing 5 [Source:HGNC Symbol;Acc:HGNC:12833]
1146	IPO9	0.0170251782786298	-0.382230600288275	0.486	0.364	1	importin 9 [Source:HGNC Symbol;Acc:HGNC:19425]
1147	IRAK1BP1	0.0177591610736516	-0.276104671303115	0.288	0.252	1	interleukin 1 receptor associated kinase 1 binding protein 1 [Source:HGNC Symbol;Acc:HGNC:17368]
1148	ABCA7	0.0179413545172221	-0.277710373137922	0.241	0.214	1	ATP binding cassette subfamily A member 7 [Source:HGNC Symbol;Acc:HGNC:37]
1149	PET100	0.0185760386181177	-0.699990491413073	0.847	0.575	1	PET100 cytochrome c oxidase chaperone [Source:HGNC Symbol;Acc:HGNC:40038]
1150	SPC24	0.0193288245859043	-0.332049125235617	0.221	0.234	1	SPC24 component of NDC80 kinetochore complex [Source:HGNC Symbol;Acc:HGNC:26913]
1151	SYNE2	0.0202283721288749	-0.504481621389159	0.833	0.529	1	spectrin repeat containing nuclear envelope protein 2 [Source:HGNC Symbol;Acc:HGNC:17084]
1152	CDKN3	0.021276266084059	-0.638246740094848	0.453	0.401	1	cyclin dependent kinase inhibitor 3 [Source:HGNC Symbol;Acc:HGNC:1791]
1153	NUDT1	0.0233295976669897	-0.681155009498067	0.739	0.475	1	nudix hydrolase 1 [Source:HGNC Symbol;Acc:HGNC:8048]
1154	ZNF253	0.024889219870178	-0.396866081756301	0.352	0.305	1	zinc finger protein 253 [Source:HGNC Symbol;Acc:HGNC:13497]
1155	ELOVL2	0.0273602384748964	-0.576166378949672	0.702	0.449	1	ELOVL fatty acid elongase 2 [Source:HGNC Symbol;Acc:HGNC:14416]
1156	DYNLT1	0.0273814932167449	-0.552286636062902	0.677	0.471	1	dynein light chain Tctex-type 1 [Source:HGNC Symbol;Acc:HGNC:11697]
1157	ASPM	0.0283426032876294	-0.28148335372746	0.431	0.351	1	assembly factor for spindle microtubules [Source:HGNC Symbol;Acc:HGNC:19048]
1158	RANBP1	0.0289721018578377	-0.396978587940543	0.896	0.608	1	RAN binding protein 1 [Source:HGNC Symbol;Acc:HGNC:9847]
1159	PBX1	0.030301722765505	-0.529240901513636	0.513	0.377	1	PBX homeobox 1 [Source:HGNC Symbol;Acc:HGNC:8632]
1160	SSTR2	0.0312776665693347	-0.427674090217236	0.841	0.513	1	somatostatin receptor 2 [Source:HGNC Symbol;Acc:HGNC:11331]
1161	DBI	0.0361914519338368	-0.45057398510324	0.845	0.544	1	diazepam binding inhibitor, acyl-CoA binding protein [Source:HGNC Symbol;Acc:HGNC:2690]
1162	CHRNB4	0.0369933780118447	-0.323854246835982	0.342	0.289	1	cholinergic receptor nicotinic beta 4 subunit [Source:HGNC Symbol;Acc:HGNC:1964]
1163	CHAC2	0.0380567228535402	-0.284553187614126	0.272	0.242	1	ChaC glutathione specific gamma-glutamylcyclotransferase 2 [Source:HGNC Symbol;Acc:HGNC:32363]
1164	H3C1	0.0391869862179817	-0.271408876998458	0.099	0.116	1	H3 clustered histone 1 [Source:HGNC Symbol;Acc:HGNC:4766]
1165	HMGA2	0.0396834986417453	-0.529780019429336	0.399	0.352	1	high mobility group AT-hook 2 [Source:HGNC Symbol;Acc:HGNC:5009]
1166	RPAP2	0.0450709086707183	-0.311740238046031	0.325	0.282	1	RNA polymerase II associated protein 2 [Source:HGNC Symbol;Acc:HGNC:25791]
1167	ZNF737	0.0484774501919472	-0.345895035355104	0.242	0.261	1	zinc finger protein 737 [Source:HGNC Symbol;Acc:HGNC:32468]
1168	SPTBN2	0.0485587840669676	-0.324427364786945	0.251	0.262	1	spectrin beta, non-erythrocytic 2 [Source:HGNC Symbol;Acc:HGNC:11276]
1169	TRIM9	0.0497950396695755	-0.30301474031409	0.347	0.285	1	tripartite motif containing 9 [Source:HGNC Symbol;Acc:HGNC:16288]
1170	KCNK3	0.0518589292301867	-0.425816640086406	0.442	0.338	1	potassium two pore domain channel subfamily K member 3 [Source:HGNC Symbol;Acc:HGNC:6278]
1171	ANP32E	0.0567887666933215	-0.311231931997939	0.913	0.601	1	acidic nuclear phosphoprotein 32 family member E [Source:HGNC Symbol;Acc:HGNC:16673]
1172	FNDC5	0.0621427256749365	-0.29700191603968	0.271	0.277	1	fibronectin type III domain containing 5 [Source:HGNC Symbol;Acc:HGNC:20240]
1173	SYK	0.0675724330464408	-0.260815787732692	0.261	0.268	1	spleen associated tyrosine kinase [Source:HGNC Symbol;Acc:HGNC:11491]
1174	TSTD2	0.069306712935684	-0.333049204436568	0.23	0.246	1	thiosulfate sulfurtransferase like domain containing 2 [Source:HGNC Symbol;Acc:HGNC:30087]
1175	NDUFB7	0.0718014322892126	-0.59758975612326	0.867	0.569	1	NADH:ubiquinone oxidoreductase subunit B7 [Source:HGNC Symbol;Acc:HGNC:7702]
1176	MAGOHB	0.0745647244081817	-0.378933150088386	0.336	0.29	1	mago homolog B, exon junction complex subunit [Source:HGNC Symbol;Acc:HGNC:25504]
1177	DBN1	0.0746612834983402	-0.624166030627493	0.534	0.391	1	drebrin 1 [Source:HGNC Symbol;Acc:HGNC:2695]
1178	SNRPD1	0.0753780713928647	-0.289750546722749	0.908	0.607	1	small nuclear ribonucleoprotein D1 polypeptide [Source:HGNC Symbol;Acc:HGNC:11158]
1179	CXXC4	0.0758938843794886	-0.29357295898777	0.237	0.249	1	CXXC finger protein 4 [Source:HGNC Symbol;Acc:HGNC:24593]
1180	BPHL	0.0848120846749243	-0.338238984590399	0.262	0.269	1	biphenyl hydrolase like [Source:HGNC Symbol;Acc:HGNC:1094]
1181	HNRNPM	0.0935399413806892	-0.631439742608358	0.863	0.563	1	heterogeneous nuclear ribonucleoprotein M [Source:HGNC Symbol;Acc:HGNC:5046]
1182	IGF2BP1	0.096812977105125	-0.4344532603294	0.494	0.371	1	insulin like growth factor 2 mRNA binding protein 1 [Source:HGNC Symbol;Acc:HGNC:28866]
1183	SLIRP	0.0984099174766192	-0.546866689130495	0.862	0.539	1	SRA stem-loop interacting RNA binding protein [Source:HGNC Symbol;Acc:HGNC:20495]
1184	BIRC5	0.107259168280469	-0.398080719467804	0.336	0.332	1	baculoviral IAP repeat containing 5 [Source:HGNC Symbol;Acc:HGNC:593]
1185	ZMYND8	0.109461921919368	-0.286963761167225	0.322	0.288	1	zinc finger MYND-type containing 8 [Source:HGNC Symbol;Acc:HGNC:9397]
1186	H4C2	0.113909834268928	-0.298870589823564	0.148	0.133	1	H4 clustered histone 2 [Source:HGNC Symbol;Acc:HGNC:4789]
1187	TPH1	0.11529570617333	-0.641866165954876	0.811	0.541	1	tryptophan hydroxylase 1 [Source:HGNC Symbol;Acc:HGNC:12008]
1188	SAYSD1	0.116551443269832	-0.304533472198891	0.234	0.245	1	SAYSVFN motif domain containing 1 [Source:HGNC Symbol;Acc:HGNC:21025]
1189	MACF1	0.130831662405241	-0.613914543618006	0.703	0.485	1	microtubule actin crosslinking factor 1 [Source:HGNC Symbol;Acc:HGNC:13664]
1190	MESD	0.135913261686541	-0.302265780324771	0.341	0.296	1	mesoderm development LRP chaperone [Source:HGNC Symbol;Acc:HGNC:13520]
1191	CORO7	0.141773116276092	0.614316014572305	0.13	0.124	1	coronin 7 [Source:HGNC Symbol;Acc:HGNC:26161]
1192	COL16A1	0.149122219340533	-0.580359136302616	0.366	0.333	1	collagen type XVI alpha 1 chain [Source:HGNC Symbol;Acc:HGNC:2193]
1193	BNIP3	0.168989577782119	-0.337428566764914	0.895	0.643	1	BCL2 interacting protein 3 [Source:HGNC Symbol;Acc:HGNC:1084]
1194	BRCA1	0.182906902983205	-0.362670290989457	0.307	0.275	1	BRCA1 DNA repair associated [Source:HGNC Symbol;Acc:HGNC:1100]
1195	APC	0.183735211215061	-0.299883111732279	0.289	0.264	1	APC regulator of WNT signaling pathway [Source:HGNC Symbol;Acc:HGNC:583]
1196	ZNF75A	0.186029006874992	-0.30042240646134	0.328	0.291	1	zinc finger protein 75a [Source:HGNC Symbol;Acc:HGNC:13146]
1197	PSMA7	0.186044343423708	-0.403152633310692	0.902	0.574	1	proteasome 20S subunit alpha 7 [Source:HGNC Symbol;Acc:HGNC:9536]
1198	FILIP1L	0.190751838264535	-0.495927296575175	0.658	0.468	1	filamin A interacting protein 1 like [Source:HGNC Symbol;Acc:HGNC:24589]
1199	THOP1	0.194227885233225	-0.290561327351506	0.292	0.262	1	thimet oligopeptidase 1 [Source:HGNC Symbol;Acc:HGNC:11793]
1200	GRM4	0.19894525647859	-0.316186243328638	0.371	0.303	1	glutamate metabotropic receptor 4 [Source:HGNC Symbol;Acc:HGNC:4596]
1201	TTF2	0.205120598202618	-0.30392732126219	0.315	0.278	1	transcription termination factor 2 [Source:HGNC Symbol;Acc:HGNC:12398]
1202	FKTN	0.229811190822289	-0.270348583960905	0.247	0.233	1	fukutin [Source:HGNC Symbol;Acc:HGNC:3622]
1203	H2AC8	0.246628085792501	-0.530409041330245	0.243	0.22	1	H2A clustered histone 8 [Source:HGNC Symbol;Acc:HGNC:4724]
1204	LRR1	0.262222143032146	-0.51725545516544	0.393	0.324	1	leucine rich repeat protein 1 [Source:HGNC Symbol;Acc:HGNC:19742]
1205	CENPV	0.273655578354332	-0.458344721964312	0.851	0.543	1	centromere protein V [Source:HGNC Symbol;Acc:HGNC:29920]
1206	CSTF3	0.288835343219752	-0.489908679874431	0.457	0.37	1	cleavage stimulation factor subunit 3 [Source:HGNC Symbol;Acc:HGNC:2485]
1207	PRKDC	0.289582458703634	-0.382140754371129	0.877	0.554	1	protein kinase, DNA-activated, catalytic subunit [Source:HGNC Symbol;Acc:HGNC:9413]
1208	NDUFS6	0.292394983500736	-0.473026787321911	0.871	0.547	1	NADH:ubiquinone oxidoreductase subunit S6 [Source:HGNC Symbol;Acc:HGNC:7713]
1209	PLCH2	0.328853340859219	-0.351347178920884	0.313	0.292	1	phospholipase C eta 2 [Source:HGNC Symbol;Acc:HGNC:29037]
1210	SMARCAD1	0.329491695693424	-0.279363592117739	0.283	0.265	1	SWI/SNF-related, matrix-associated actin-dependent regulator of chromatin, subfamily a, containing DEAD/H box 1 [Source:HGNC Symbol;Acc:HGNC:18398]
1211	NRL	0.342608134708489	-0.258594027818474	0.17	0.18	1	neural retina leucine zipper [Source:HGNC Symbol;Acc:HGNC:8002]
1212	DONSON	0.3446092143599	-1.31881756192547	0.645	0.516	1	DNA replication fork stabilization factor DONSON [Source:HGNC Symbol;Acc:HGNC:2993]
1213	RBMX	0.346037986108984	-0.305395896968481	0.935	0.619	1	RNA binding motif protein X-linked [Source:HGNC Symbol;Acc:HGNC:9910]
1214	LSM7	0.34815034405006	-0.347292995003374	0.917	0.63	1	LSM7 homolog, U6 small nuclear RNA and mRNA degradation associated [Source:HGNC Symbol;Acc:HGNC:20470]
1215	NAA38	0.357524273394908	-0.495699305795613	0.877	0.561	1	N-alpha-acetyltransferase 38, NatC auxiliary subunit [Source:HGNC Symbol;Acc:HGNC:28212]
1216	H4C1	0.396927069038626	-0.269546625596656	0.117	0.124	1	H4 clustered histone 1 [Source:HGNC Symbol;Acc:HGNC:4781]
1217	ATOH7	0.410870640038366	-0.533789037912848	0.412	0.345	1	atonal bHLH transcription factor 7 [Source:HGNC Symbol;Acc:HGNC:13907]
1218	TMEM132A	0.428632444622978	-0.390157395422623	0.353	0.299	1	transmembrane protein 132A [Source:HGNC Symbol;Acc:HGNC:31092]
1219	ATP5PF	0.443216331256482	-0.35066755740112	0.893	0.6	1	ATP synthase peripheral stalk subunit F6 [Source:HGNC Symbol;Acc:HGNC:847]
1220	PPP6R2	0.485997240519861	-0.270889025578203	0.223	0.232	1	protein phosphatase 6 regulatory subunit 2 [Source:HGNC Symbol;Acc:HGNC:19253]
1221	NPHS1	0.495746341349425	-0.511925690132097	0.402	0.337	1	NPHS1 adhesion molecule, nephrin [Source:HGNC Symbol;Acc:HGNC:7908]
1222	VCAN	0.496285561079427	-0.307343282674511	0.333	0.302	1	versican [Source:HGNC Symbol;Acc:HGNC:2464]
1223	MORC2	0.500008029727788	-0.253430174473793	0.224	0.218	1	MORC family CW-type zinc finger 2 [Source:HGNC Symbol;Acc:HGNC:23573]
1224	ATP5MF	0.515635330123146	-0.433644349739207	0.882	0.587	1	ATP synthase membrane subunit f [Source:HGNC Symbol;Acc:HGNC:848]
1225	RRM2	0.525820569432867	-0.480518234139078	0.562	0.462	1	ribonucleotide reductase regulatory subunit M2 [Source:HGNC Symbol;Acc:HGNC:10452]
1226	RBX1	0.526733400966805	-0.608639763381223	0.84	0.559	1	ring-box 1 [Source:HGNC Symbol;Acc:HGNC:9928]
1227	FMN2	0.528313230080276	-0.301320338401927	0.333	0.295	1	formin 2 [Source:HGNC Symbol;Acc:HGNC:14074]
1228	MTG1	0.530393637875469	-0.260726992161201	0.208	0.212	1	mitochondrial ribosome associated GTPase 1 [Source:HGNC Symbol;Acc:HGNC:32159]
1229	ZNF107	0.546080861097284	-0.32471804586963	0.286	0.271	1	zinc finger protein 107 [Source:HGNC Symbol;Acc:HGNC:12887]
1230	ASAP1	0.63984637050322	-0.617294571480171	0.727	0.482	1	ArfGAP with SH3 domain, ankyrin repeat and PH domain 1 [Source:HGNC Symbol;Acc:HGNC:2720]
1231	MXD3	0.652263556561672	-0.404225306727153	0.299	0.284	1	MAX dimerization protein 3 [Source:HGNC Symbol;Acc:HGNC:14008]
1232	H2BC11	0.655470802779479	-0.652682964221852	0.34	0.307	1	H2B clustered histone 11 [Source:HGNC Symbol;Acc:HGNC:4761]
1233	CDKAL1	0.664218523886708	-0.695722016878264	0.734	0.498	1	CDK5 regulatory subunit associated protein 1 like 1 [Source:HGNC Symbol;Acc:HGNC:21050]
1234	PHACTR2	0.668102494616672	-0.277544043176049	0.277	0.268	1	phosphatase and actin regulator 2 [Source:HGNC Symbol;Acc:HGNC:20956]
1235	MARK1	0.671778877883388	-0.293991206632438	0.27	0.26	1	microtubule affinity regulating kinase 1 [Source:HGNC Symbol;Acc:HGNC:6896]
1236	CDCA3	0.684359337265445	-0.29068460460849	0.28	0.28	1	cell division cycle associated 3 [Source:HGNC Symbol;Acc:HGNC:14624]
1237	NDUFB1	0.69396536125065	-0.691786196612747	0.826	0.531	1	NADH:ubiquinone oxidoreductase subunit B1 [Source:HGNC Symbol;Acc:HGNC:7695]
1238	STXBP5L	0.711102579751083	-0.386142148236472	0.299	0.284	1	syntaxin binding protein 5 like [Source:HGNC Symbol;Acc:HGNC:30757]
1239	TXNIP	0.751048318195425	-0.317794685526616	0.231	0.22	1	thioredoxin interacting protein [Source:HGNC Symbol;Acc:HGNC:16952]
1240	SPPL2B	0.810351914925923	-0.333585097829134	0.247	0.244	1	signal peptide peptidase like 2B [Source:HGNC Symbol;Acc:HGNC:30627]
1241	NASP	0.816978930489932	-0.365587755513117	0.918	0.606	1	nuclear autoantigenic sperm protein [Source:HGNC Symbol;Acc:HGNC:7644]
1242	DUT	0.825228778501176	-0.54999191031943	0.838	0.57	1	deoxyuridine triphosphatase [Source:HGNC Symbol;Acc:HGNC:3078]
1243	ACAD9	0.878603315274385	-0.253630841582184	0.2	0.2	1	acyl-CoA dehydrogenase family member 9 [Source:HGNC Symbol;Acc:HGNC:21497]
1244	C21orf58	0.888333349566927	-0.795902482208841	0.524	0.417	1	chromosome 21 open reading frame 58 [Source:HGNC Symbol;Acc:HGNC:1300]
1245	PPP1R14B	0.902367181862592	-0.499829716647409	0.876	0.553	1	protein phosphatase 1 regulatory inhibitor subunit 14B [Source:HGNC Symbol;Acc:HGNC:9057]
1246	TRAK2	0.983933984048194	-0.427378309359202	0.397	0.342	1	trafficking kinesin protein 2 [Source:HGNC Symbol;Acc:HGNC:13206]

## Sheet: GO_Up
	ONTOLOGY	ID	Description	GeneRatio	BgRatio	pvalue	p.adjust	qvalue	geneID	Count
GO:0045787	BP	GO:0045787	positive regulation of cell cycle	35/524	336/13890	5.22034699781709e-08	6.04690193913813e-06	5.38977931265852e-06	GADD45A/KMT2E/HSP90AB1/EIF4E/DYNC1LI1/RAB11A/TRIAP1/APP/RAD21/CALR/CDC42/SRPK2/RPS15A/CHEK1/CDKN1A/CDT1/CCNT2/DDX3X/DDX39B/CUL3/SMC5/BRD4/UBE2B/ASNS/PHIP/PAFAH1B1/CNOT4/RAD23A/RHOA/SIN3A/NIPBL/TPR/FBXO5/RPL26/NPM1	35
GO:0030968	BP	GO:0030968	endoplasmic reticulum unfolded protein response	19/524	118/13890	8.36562140877703e-08	9.42828142556762e-06	8.40370105103604e-06	DNAJB9/HSPA5/DNAJC3/HERPUD1/PPP1R15B/SERP1/XBP1/HSP90B1/CALR/ERO1A/PTPN2/ATF4/SEC31A/ASNS/SRPRA/LMNA/SSR1/PDIA6/CANX	19
GO:0006695	BP	GO:0006695	cholesterol biosynthetic process	11/524	61/13890	1.49709434424517e-05	0.000810764079935372	0.000722657570680752	MSMO1/INSIG1/FDFT1/HMGCR/CNBP/SQLE/HMGCS1/EBP/MVD/KPNB1/SCD	11
GO:1902653	BP	GO:1902653	secondary alcohol biosynthetic process	11/524	61/13890	1.49709434424517e-05	0.000810764079935372	0.000722657570680752	MSMO1/INSIG1/FDFT1/HMGCR/CNBP/SQLE/HMGCS1/EBP/MVD/KPNB1/SCD	11
GO:0000075	BP	GO:0000075	cell cycle checkpoint	21/524	212/13890	5.28966455754638e-05	0.0022740104335019	0.00202689154125841	GADD45A/SYF2/UIMC1/DYNC1LI1/TRIAP1/CDC5L/IK/CHEK1/CDKN1A/CDT1/RAD1/DDX39B/ATF2/WAC/BUB3/CRY1/CNOT4/ZNF207/FEM1B/TPR/RPL26	21
GO:0007569	BP	GO:0007569	cell aging	13/524	95/13890	5.55015558934492e-05	0.00233779280884529	0.0020837426247716	RSL1D1/NAMPT/ING2/CALR/RWDD1/CHEK1/YPEL3/CDKN1A/MARCHF5/SMC5/LMNA/FBXO5/NPM1	13
GO:0007091	BP	GO:0007091	metaphase/anaphase transition of mitotic cell cycle	9/524	57/13890	0.000258361734074362	0.00819675398647806	0.00730600487851925	DYNC1LI1/RAD21/IK/CDT1/CUL3/BUB3/ZNF207/TPR/FBXO5	9
GO:0044784	BP	GO:0044784	metaphase/anaphase transition of cell cycle	9/524	57/13890	0.000258361734074362	0.00819675398647806	0.00730600487851925	DYNC1LI1/RAD21/IK/CDT1/CUL3/BUB3/ZNF207/TPR/FBXO5	9
GO:0061621	BP	GO:0061621	canonical glycolysis	6/524	26/13890	0.000338377651282162	0.0100073390485576	0.00891983192741555	ALDOC/ALDOA/GPI/PKM/TPI1/GAPDH	6
GO:0061718	BP	GO:0061718	glucose catabolic process to pyruvate	6/524	26/13890	0.000338377651282162	0.0100073390485576	0.00891983192741555	ALDOC/ALDOA/GPI/PKM/TPI1/GAPDH	6
GO:0007084	BP	GO:0007084	mitotic nuclear envelope reassembly	4/524	10/13890	0.000350696152043456	0.0102265940840644	0.00911526030817404	PPP2R2A/REEP3/PPP2CA/LMNA	4
GO:0061620	BP	GO:0061620	glycolytic process through glucose-6-phosphate	6/524	27/13890	0.000421330330348761	0.011871266740232	0.0105812048112481	ALDOC/ALDOA/GPI/PKM/TPI1/GAPDH	6
GO:0061615	BP	GO:0061615	glycolytic process through fructose-6-phosphate	6/524	28/13890	0.000519331860116953	0.0135350866042981	0.0120642157767958	ALDOC/ALDOA/GPI/PKM/TPI1/GAPDH	6
GO:1902751	BP	GO:1902751	positive regulation of cell cycle G2/M phase transition	6/524	28/13890	0.000519331860116953	0.0135350866042981	0.0120642157767958	RAB11A/APP/BRD4/SIN3A/FBXO5/NPM1	6
GO:1901987	BP	GO:1901987	regulation of cell cycle phase transition	30/524	419/13890	0.000597622357686281	0.0153832421700728	0.0137115305067593	GADD45A/KMT2E/SYF2/UIMC1/DYNC1LI1/RAB11A/TRIAP1/APP/RAD21/IK/CHEK1/CDKN1A/CDT1/DDX3X/CUL3/BUB3/BRD4/PAFAH1B1/AKAP9/CNOT4/ZNF207/FBXO7/SIN3A/HSP90AA1/TPR/FBXO5/RPL26/NPM1/TPX2/NEK2	30
GO:0008203	BP	GO:0008203	cholesterol metabolic process	13/524	125/13890	0.000871791122002232	0.0204234212289287	0.0182039884789467	MSMO1/INSIG1/FDFT1/HMGCR/CNBP/APP/SQLE/HMGCS1/EBP/MVD/KPNB1/LDLR/SCD	13
GO:0040029	BP	GO:0040029	regulation of gene expression, epigenetic	16/524	187/13890	0.00193759095165602	0.0357511250814407	0.0318660160703186	TAF1D/MORF4L1/EIF1/PHF1/MTF2/EPC1/CHEK1/ARID4B/MIER1/YTHDC1/RLIM/BAZ1B/GPX1/SIN3A/PPM1D/H3-3B	16
GO:0006096	BP	GO:0006096	glycolytic process	11/524	105/13890	0.00200792153941399	0.0365634620932591	0.0325900756408678	DDIT4/ALDOC/ALDOA/APP/NUP93/NUP58/GPI/TPR/PKM/TPI1/GAPDH	11
GO:0010971	BP	GO:0010971	positive regulation of G2/M transition of mitotic cell cycle	5/524	25/13890	0.00212814901590097	0.0381136651237095	0.0339718166229505	RAB11A/APP/BRD4/SIN3A/FBXO5	5
GO:0036293	BP	GO:0036293	response to decreased oxygen levels	23/524	320/13890	0.00239453655180385	0.0412388878269653	0.0367574183811724	VEGFA/DDIT4/NAMPT/HILPDA/HSP90B1/ALKBH5/UBQLN1/ERO1A/UBC/ATF4/TMBIM6/AK4/RBPJ/CXCR4/LMNA/FOXO3/RHOA/PDLIM1/NPEPPS/PDK1/RORA/RPS27A/PKM	23
GO:0036294	BP	GO:0036294	cellular response to decreased oxygen levels	16/524	191/13890	0.002403129434521	0.0412388878269653	0.0367574183811724	VEGFA/NAMPT/HILPDA/UBQLN1/ERO1A/UBC/ATF4/TMBIM6/AK4/RBPJ/LMNA/FOXO3/NPEPPS/PDK1/RORA/RPS27A	16
GO:0070482	BP	GO:0070482	response to oxygen levels	24/524	342/13890	0.00265931463813877	0.0441806455818275	0.0393794925026966	VEGFA/DDIT4/NAMPT/HILPDA/HSP90B1/ALKBH5/UBQLN1/ERO1A/CDKN1A/UBC/ATF4/TMBIM6/AK4/RBPJ/CXCR4/LMNA/FOXO3/RHOA/PDLIM1/NPEPPS/PDK1/RORA/RPS27A/PKM	24
GO:0005925	CC	GO:0005925	focal adhesion	36/539	391/14516	5.04232944722295e-07	2.51035186843599e-05	2.20638929600929e-05	HSPA5/HSPB1/ARF1/HSP90B1/RPS8/MTF2/CALR/CDC42/MPZL1/LAMTOR3/PPIB/HSPA9/RPS13/RAB21/PPP1CC/SCARB2/G3BP1/RHOA/RPL5/RPL8/PDLIM1/RPL9/PCBP2/RPLP1/PABPC1/RPL12/RPLP0/RPS10/RPL30/RPS7/RPS3A/RPS3/RPL22/RPL19/NPM1/RPL4	36
GO:0005868	CC	GO:0005868	cytoplasmic dynein complex	4/539	20/14516	0.00566962085998258	0.0489124918259514	0.0429899886796182	DYNC1LI1/TOPORS/DYNLL2/TPR	4
GO:0050839	MF	GO:0050839	cell adhesion molecule binding	32/535	488/14257	0.00158592338064709	0.0435468128269347	0.0399263166882206	HSPA5/SLC3A2/RSL1D1/EIF4H/DNAJB1/VAPA/HSP90AB1/RAB1A/ALDOA/EIF2A/ZC3H15/IST1/CAMLG/CALR/PTPN2/RPL24/DDX3X/CRKL/KTN1/GOLGA2/SEPTIN7/RPL14/ATXN2L/PDLIM1/KIF5B/EIF3E/RPL15/PCBP1/ARGLU1/RPL29/PKM/RTN4	32
GO:0006413	BP	GO:0006413	translational initiation	49/524	187/13890	5.74791831777594e-28	2.39688193851257e-24	2.1364104821123e-24	EIF4A2/DNAJC3/HSPB1/UHMK1/PPP1R15B/EIF4H/EIF2A/EIF1/EIF4E/EIF3H/RPL17/RPS8/RPS15A/RPL24/ATF4/DDX3X/RPS13/EIF1B/EIF3F/EIF3A/RPL39/RPL14/RPL32/EIF4B/RPL5/RPS24/RPL8/RPL9/EIF3B/EIF3E/RPLP1/PABPC1/RPL12/RPLP0/RPS10/RPL11/RPL15/RPL30/RPL29/RPS7/TPR/RPS27A/RPS3A/RPS3/RPL22/RPL26/RPL19/NPM1/RPL4	49
GO:0006613	BP	GO:0006613	cotranslational protein targeting to membrane	35/524	99/13890	3.77459013677562e-25	7.87002043517716e-22	7.01477777523932e-22	TRAM1/RPL17/SSR3/RPS8/SRP54/RPS15A/RPL24/RPS13/SRPRA/SSR1/RPL39/RPL14/RPL32/RPL5/RPS24/RPL8/RPL9/RPLP1/RPL12/SSR2/RPLP0/RPS10/RPL11/RPL15/RPL30/RPL29/RPS7/RPS27A/RPS3A/RPS3/RPL22/RPL26/ARL6IP1/RPL19/RPL4	35
GO:0006614	BP	GO:0006614	SRP-dependent cotranslational protein targeting to membrane	32/524	95/13890	2.42737255789238e-22	2.92140946701159e-19	2.60393710160746e-19	TRAM1/RPL17/SSR3/RPS8/SRP54/RPS15A/RPL24/RPS13/SRPRA/RPL39/RPL14/RPL32/RPL5/RPS24/RPL8/RPL9/RPLP1/RPL12/RPLP0/RPS10/RPL11/RPL15/RPL30/RPL29/RPS7/RPS27A/RPS3A/RPS3/RPL22/RPL26/RPL19/RPL4	32
GO:0045047	BP	GO:0045047	protein targeting to ER	34/524	110/13890	2.80231123933966e-22	2.92140946701159e-19	2.60393710160746e-19	HSPA5/TRAM1/RPL17/SSR3/RPS8/SRP54/RPS15A/RPL24/RPS13/SRPRA/RPL39/RPL14/RPL32/RPL5/RPS24/RPL8/RPL9/RPLP1/RPL12/RPLP0/RPS10/RPL11/RPL15/RPL30/RPL29/RPS7/SEC61G/RPS27A/RPS3A/RPS3/RPL22/RPL26/RPL19/RPL4	34
GO:0072599	BP	GO:0072599	establishment of protein localization to endoplasmic reticulum	34/524	114/13890	1.02760444788702e-21	8.57022109537776e-19	7.63888695892437e-19	HSPA5/TRAM1/RPL17/SSR3/RPS8/SRP54/RPS15A/RPL24/RPS13/SRPRA/RPL39/RPL14/RPL32/RPL5/RPS24/RPL8/RPL9/RPLP1/RPL12/RPLP0/RPS10/RPL11/RPL15/RPL30/RPL29/RPS7/SEC61G/RPS27A/RPS3A/RPS3/RPL22/RPL26/RPL19/RPL4	34
GO:0070972	BP	GO:0070972	protein localization to endoplasmic reticulum	37/524	139/13890	1.27584838971681e-21	8.86714630853182e-19	7.90354502471939e-19	HSPA5/INSIG1/VAPA/TRAM1/RPL17/SSR3/RPS8/SRP54/RPS15A/RPL24/RPS13/SRPRA/RPL39/RPL14/RPL32/RPL5/RPS24/RPL8/RPL9/RPLP1/RPL12/RPLP0/RPS10/RPL11/RPL15/RPL30/RPL29/RPS7/SEC61G/RPS27A/RPS3A/RPS3/RPL22/RPL26/RPL19/RTN4/RPL4	37
GO:0019080	BP	GO:0019080	viral gene expression	42/524	191/13890	6.36731037269222e-21	3.79309775058951e-18	3.38089818435733e-18	JUN/POLR2C/RPL17/RPS8/RPS15A/PTBP1/RPL24/CCNT2/RPS13/NUP93/POLR2A/NUP58/CHD1/EIF3F/EIF3A/RSF1/RPL39/RPL14/RPL32/RPL5/RPS24/RPL8/RPL9/EIF3B/PCBP2/RPLP1/RPL12/RPLP0/RPS10/RPL11/RPL15/RPL30/RPL29/RPS7/TPR/RPS27A/RPS3A/RPS3/RPL22/RPL26/RPL19/RPL4	42
GO:0008380	BP	GO:0008380	RNA splicing	62/524	430/13890	3.48116947117923e-20	1.81455958685217e-17	1.61736965825446e-17	SMNDC1/SRSF4/PRPF38B/PAPOLA/SYF2/PPIG/SRRM1/CLK1/RBM22/MPHOSPH10/WBP11/POLR2C/SRSF11/CIR1/SLC38A2/BUD31/JMJD6/PRPF39/FIP1L1/SF3B2/LUC7L2/SAP18/RBM25/PTBP3/ALYREF/PPP4R2/CDC5L/RBM39/RP9/SREK1IP1/SREK1/IK/SRPK2/PTBP1/WTAP/DHX15/PNN/PRPF40A/TCERG1/PPP2CA/YTHDC1/SF1/PRPF4B/TRA2A/DDX39B/RPS13/SFSWAP/TRA2B/TMBIM6/POLR2A/CELF1/HNRNPC/KHDC4/SRSF1/PABPN1/PCBP2/SRSF10/PABPC1/KHSRP/SRRM2/PCBP1/SPEN	62
GO:0000184	BP	GO:0000184	nuclear-transcribed mRNA catabolic process, nonsense-mediated decay	33/524	120/13890	6.8669923964381e-20	3.18170647701632e-17	2.83594738617812e-17	RPL17/RPS8/PPP2R2A/RPS15A/RPL24/PPP2CA/RPS13/DCP2/RPL39/RPL14/RPL32/RPL5/RPS24/RPL8/RPL9/EIF3E/RPLP1/PABPC1/RPL12/RPLP0/RPS10/RPL11/RPL15/RPL30/RPL29/RPS7/RPS27A/RPS3A/RPS3/RPL22/RPL26/RPL19/RPL4	33
GO:0019083	BP	GO:0019083	viral transcription	37/524	174/13890	4.80171364959756e-18	2.00231459188218e-15	1.78472114702411e-15	JUN/POLR2C/RPL17/RPS8/RPS15A/RPL24/CCNT2/RPS13/NUP93/POLR2A/NUP58/CHD1/RSF1/RPL39/RPL14/RPL32/RPL5/RPS24/RPL8/RPL9/RPLP1/RPL12/RPLP0/RPS10/RPL11/RPL15/RPL30/RPL29/RPS7/TPR/RPS27A/RPS3A/RPS3/RPL22/RPL26/RPL19/RPL4	37
GO:0006612	BP	GO:0006612	protein targeting to membrane	38/524	191/13890	1.83466444526391e-17	6.95504612431864e-15	6.19923459926016e-15	HSPA5/TRAM1/RPL17/SSR3/RPS8/SRP54/RPS15A/RPL24/RPS13/SRPRA/NACA/SSR1/RPL39/RPL14/RPL32/RPL5/RPS24/RPL8/RPL9/RPLP1/RPL12/SSR2/RPLP0/RPS10/RPL11/RPL15/RPL30/RPL29/RPS7/SEC61G/RPS27A/RPS3A/RPS3/RPL22/RPL26/ARL6IP1/RPL19/RPL4	38
GO:0002181	BP	GO:0002181	cytoplasmic translation	28/524	99/13890	2.04019032893183e-17	7.0896613930381e-15	6.31922109777043e-15	EIF4A2/EIF4H/ZC3H15/EIF3H/RPL17/CNBP/RWDD1/RPL24/EIF3F/RPL22L1/EIF3A/RPL39/RPL32/EIF4B/RPL8/RPL9/EIF3B/EIF3E/RPLP1/RPLP0/RPL11/RPL15/RPL30/RPL29/RPL22/RPL26/RPL19/PKM	28
GO:0000375	BP	GO:0000375	RNA splicing, via transesterification reactions	50/524	343/13890	1.2273585420564e-16	3.93698855413477e-14	3.50915223643819e-14	SMNDC1/SRSF4/PAPOLA/SYF2/SRRM1/RBM22/MPHOSPH10/WBP11/POLR2C/SRSF11/BUD31/JMJD6/PRPF39/FIP1L1/SF3B2/LUC7L2/SAP18/RBM25/PTBP3/ALYREF/CDC5L/RBM39/SREK1/IK/SRPK2/PTBP1/WTAP/DHX15/PNN/PRPF40A/YTHDC1/SF1/PRPF4B/TRA2A/DDX39B/SFSWAP/TRA2B/POLR2A/CELF1/HNRNPC/KHDC4/SRSF1/PABPN1/PCBP2/SRSF10/PABPC1/KHSRP/SRRM2/PCBP1/SPEN	50
GO:0000377	BP	GO:0000377	RNA splicing, via transesterification reactions with bulged adenosine as nucleophile	48/524	340/13890	1.87333862731876e-15	5.20788138394615e-13	4.64193592495617e-13	SMNDC1/SRSF4/PAPOLA/SYF2/SRRM1/RBM22/WBP11/POLR2C/SRSF11/BUD31/JMJD6/PRPF39/FIP1L1/SF3B2/LUC7L2/SAP18/RBM25/PTBP3/ALYREF/CDC5L/RBM39/SREK1/IK/SRPK2/PTBP1/WTAP/DHX15/PNN/PRPF40A/YTHDC1/SF1/PRPF4B/TRA2A/DDX39B/SFSWAP/TRA2B/POLR2A/CELF1/HNRNPC/KHDC4/SRSF1/PABPN1/PCBP2/SRSF10/PABPC1/SRRM2/PCBP1/SPEN	48
GO:0000398	BP	GO:0000398	mRNA splicing, via spliceosome	48/524	340/13890	1.87333862731876e-15	5.20788138394615e-13	4.64193592495617e-13	SMNDC1/SRSF4/PAPOLA/SYF2/SRRM1/RBM22/WBP11/POLR2C/SRSF11/BUD31/JMJD6/PRPF39/FIP1L1/SF3B2/LUC7L2/SAP18/RBM25/PTBP3/ALYREF/CDC5L/RBM39/SREK1/IK/SRPK2/PTBP1/WTAP/DHX15/PNN/PRPF40A/YTHDC1/SF1/PRPF4B/TRA2A/DDX39B/SFSWAP/TRA2B/POLR2A/CELF1/HNRNPC/KHDC4/SRSF1/PABPN1/PCBP2/SRSF10/PABPC1/SRRM2/PCBP1/SPEN	48
GO:0006397	BP	GO:0006397	mRNA processing	58/524	494/13890	9.18443217333758e-15	2.32654059094615e-12	2.07371319617086e-12	SMNDC1/SRSF4/RNMT/PRPF38B/PAPOLA/SYF2/SRRM1/RBM22/WBP11/POLR2C/SRSF11/CIR1/BUD31/JMJD6/PRPF39/ALKBH5/FIP1L1/SF3B2/LUC7L2/APP/SAP18/RBM25/PTBP3/ALYREF/PPP4R2/CDC5L/RBM39/SREK1IP1/SREK1/IK/SRPK2/PTBP1/WTAP/DHX15/PNN/PRPF40A/TCERG1/SAFB2/YTHDC1/SF1/PRPF4B/TRA2A/DDX39B/SFSWAP/TRA2B/POLR2A/CELF1/HNRNPC/KHDC4/SRSF1/PABPN1/PCBP2/SRSF10/PABPC1/KHSRP/SRRM2/PCBP1/SPEN	58
GO:0000956	BP	GO:0000956	nuclear-transcribed mRNA catabolic process	36/524	206/13890	9.48469785277808e-15	2.32654059094615e-12	2.07371319617086e-12	RPL17/RPS8/PPP2R2A/TOB1/RPS15A/RPL24/PPP2CA/RPS13/DCP2/DIS3/RPL39/CNOT4/RPL14/RPL32/RPL5/RPS24/RPL8/RPL9/EIF3E/RPLP1/PABPC1/RPL12/RPLP0/RPS10/RPL11/RPL15/RPL30/RPL29/RPS7/RPS27A/RPS3A/RPS3/RPL22/RPL26/RPL19/RPL4	36
GO:0090150	BP	GO:0090150	establishment of protein localization to membrane	44/524	316/13890	4.89660993999147e-14	1.13438130276469e-11	1.01110699988947e-11	HSPA5/GOLGA4/STX3/TRAM1/RPL17/RAB11A/SSR3/RPS8/PREPL/SRP54/RPS15A/ACSL3/RPL24/RPS13/SRPRA/NACA/SSR1/RPL39/RPL14/RPL32/RPL5/RPS24/RPL8/RPL9/RPLP1/RPL12/SSR2/RPLP0/RPS10/RPL11/RPL15/RPL30/RPL29/RPS7/HSP90AA1/SEC61G/RPS27A/RPS3A/RPS3/RPL22/RPL26/ARL6IP1/RPL19/RPL4	44
GO:0006402	BP	GO:0006402	mRNA catabolic process	44/524	354/13890	2.72599733962131e-12	5.98284679274782e-10	5.33268510038938e-10	HSPB1/RPL17/ALKBH5/RPS8/PPP2R2A/TOB1/RPS15A/UBC/RPL24/PPP2CA/RPS13/DCP2/PUM1/DIS3/RPL39/CNOT4/RPL14/HNRNPC/RPL32/RPL5/RPS24/RPL8/RPL9/EIF3E/RPLP1/PABPC1/RPL12/KHSRP/RPLP0/RPS10/RPL11/RPL15/RPL30/RPL29/XPO1/RPS7/RPS27A/RPS3A/RPS3/RPL22/RPL26/RPL19/NPM1/RPL4	44
GO:0006605	BP	GO:0006605	protein targeting	46/524	413/13890	4.0183536939559e-11	8.37826745189804e-09	7.46779310176751e-09	HSPA5/TRAM1/RPL17/SSR3/RPS8/LMAN1/TOMM20/SRP54/RPS15A/UBC/RPL24/RPS13/SRPRA/SCARB2/NACA/SSR1/RPL39/RPL14/RPL32/FBXO7/RPL5/RPS24/UBE2D3/RPL8/RPL9/NPEPPS/RPLP1/RPL12/SSR2/RPLP0/RPS10/RPL11/RPL15/RPL30/RPL29/RPS7/HSP90AA1/SEC61G/RPS27A/RPS3A/RPS3/RPL22/RPL26/ARL6IP1/RPL19/RPL4	46
GO:0006401	BP	GO:0006401	RNA catabolic process	44/524	388/13890	6.04125880190269e-11	1.19962139066353e-08	1.06925738493827e-08	HSPB1/RPL17/ALKBH5/RPS8/PPP2R2A/TOB1/RPS15A/UBC/RPL24/PPP2CA/RPS13/DCP2/PUM1/DIS3/RPL39/CNOT4/RPL14/HNRNPC/RPL32/RPL5/RPS24/RPL8/RPL9/EIF3E/RPLP1/PABPC1/RPL12/KHSRP/RPLP0/RPS10/RPL11/RPL15/RPL30/RPL29/XPO1/RPS7/RPS27A/RPS3A/RPS3/RPL22/RPL26/RPL19/NPM1/RPL4	44
GO:0022613	BP	GO:0022613	ribonucleoprotein complex biogenesis	46/524	432/13890	1.84159212110986e-10	3.49065415683097e-08	3.11132142566456e-08	RSL1D1/SBDS/BRIX1/RIOK3/EIF4H/HSP90AB1/EIF2A/MPHOSPH10/WBP11/EIF3H/PRPF39/GLUL/RPS8/LUC7L2/SRPK2/RPL24/YTHDC1/SF1/DDX3X/TRMT112/DDX39B/SFSWAP/NSA2/DIS3/GNL2/EIF3F/EIF3A/CELF1/RPL14/EIF4B/KHDC4/RPL5/RPS24/SRSF1/EIF3B/EIF3E/SRSF10/RPL12/RPLP0/RPS10/RPL11/XPO1/RPS7/HSP90AA1/RPL26/NPM1	46
GO:0043484	BP	GO:0043484	regulation of RNA splicing	25/524	146/13890	1.95826082629866e-10	3.55041201985453e-08	3.16458534446709e-08	SRSF4/CLK1/RBM22/SLC38A2/JMJD6/SAP18/RBM25/PTBP3/RBM39/SREK1/IK/SRPK2/PTBP1/WTAP/YTHDC1/SF1/TRA2A/RPS13/SFSWAP/TRA2B/TMBIM6/POLR2A/CELF1/SRSF1/SRSF10	25
GO:0006417	BP	GO:0006417	regulation of translation	40/524	348/13890	3.10876909233406e-10	5.40148629793042e-08	4.81450160746998e-08	EIF4A2/DNAJC3/HSPB1/UHMK1/PPP1R15B/SERP1/EIF4H/EIF2A/EIF1/EIF4E/EIF3H/CNBP/APP/PTBP3/CALR/TOB1/PTBP1/ATF4/DDX3X/DDX39B/PURA/PUM1/EIF1B/CELF1/FOXO3/RHOA/EIF4B/RPL5/EIF3B/EIF3E/RPLP1/PABPC1/KHSRP/RPL30/TPR/RPS3/RPL26/NPM1/PKM/GAPDH	40
GO:0071826	BP	GO:0071826	ribonucleoprotein complex subunit organization	28/524	195/13890	1.08774791901879e-09	1.81436352892335e-07	1.61719490612857e-07	BRIX1/EIF4H/HSP90AB1/EIF3H/PRPF39/LUC7L2/SRPK2/RPL24/YTHDC1/SF1/DDX39B/SFSWAP/EIF3F/EIF3A/CELF1/EIF4B/KHDC4/RPL5/KIF5B/SRSF1/EIF3B/EIF3E/SRSF10/RPL12/RPLP0/RPS10/RPL11/HSP90AA1	28
GO:0006986	BP	GO:0006986	response to unfolded protein	26/524	173/13890	1.59773070644167e-09	2.56251424840837e-07	2.28404337022086e-07	DNAJB9/HSPA5/DNAJC3/HERPUD1/HSPB1/PPP1R15B/SERP1/DNAJB1/HSP90AB1/XBP1/HSP90B1/CALR/ERO1A/PTPN2/ATF4/HSPA9/SEC31A/TMBIM6/ASNS/SRPRA/LMNA/HSPH1/SSR1/PDIA6/CANX/HSP90AA1	26
GO:0022618	BP	GO:0022618	ribonucleoprotein complex assembly	27/524	188/13890	2.15820388729747e-09	3.33322600371498e-07	2.9710011407592e-07	BRIX1/EIF4H/HSP90AB1/EIF3H/PRPF39/LUC7L2/SRPK2/RPL24/YTHDC1/SF1/DDX39B/SFSWAP/EIF3F/EIF3A/CELF1/EIF4B/KHDC4/RPL5/SRSF1/EIF3B/EIF3E/SRSF10/RPL12/RPLP0/RPS10/RPL11/HSP90AA1	27
GO:0035966	BP	GO:0035966	response to topologically incorrect protein	27/524	195/13890	4.87188353836936e-09	7.25562655535723e-07	6.46715066691061e-07	DNAJB9/HSPA5/DNAJC3/HERPUD1/HSPB1/PPP1R15B/SERP1/DNAJB1/HSP90AB1/XBP1/HSP90B1/CALR/ERO1A/PTPN2/ATF4/HSPA9/CUL3/SEC31A/TMBIM6/ASNS/SRPRA/LMNA/HSPH1/SSR1/PDIA6/CANX/HSP90AA1	27
GO:0034248	BP	GO:0034248	regulation of cellular amide metabolic process	41/524	401/13890	6.21954886934248e-09	8.9432823397097e-07	7.9714072804531e-07	EIF4A2/DNAJC3/HSPB1/UHMK1/PPP1R15B/SERP1/EIF4H/EIF2A/EIF1/EIF4E/EIF3H/CNBP/APP/PTBP3/CALR/TOB1/PTBP1/ATF4/DDX3X/DDX39B/PURA/PUM1/EIF1B/CELF1/FOXO3/RHOA/EIF4B/RPL5/EIF3B/EIF3E/RPLP1/PDK1/PABPC1/KHSRP/RPL30/TPR/RPS3/RPL26/NPM1/PKM/GAPDH	41
GO:0033044	BP	GO:0033044	regulation of chromosome organization	36/524	332/13890	1.17618189940347e-08	1.60035723336246e-06	1.42644487971799e-06	VEGFA/KMT2E/ING2/DYNC1LI1/PHF1/MTF2/RAD21/NSD3/TERF2IP/IK/CCT4/CHEK1/MIER1/CDT1/CUL3/TAF7/SMC5/DCP2/BUB3/BRD4/UBE2B/ATF7IP/LMNA/ZNF451/PAXBP1/HNRNPC/ZNF207/SETD5/UBR5/SIN3A/NIPBL/KDM3A/TPR/FBXO5/H3-3B/NEK2	36
GO:0006446	BP	GO:0006446	regulation of translational initiation	16/524	74/13890	1.18971401041334e-08	1.60035723336246e-06	1.42644487971799e-06	EIF4A2/DNAJC3/HSPB1/UHMK1/PPP1R15B/EIF4H/EIF1/EIF3H/ATF4/DDX3X/EIF1B/EIF4B/EIF3B/EIF3E/TPR/NPM1	16
GO:0048024	BP	GO:0048024	regulation of mRNA splicing, via spliceosome	19/524	106/13890	1.38071022360946e-08	1.79923801014107e-06	1.60371309196217e-06	SRSF4/JMJD6/SAP18/RBM25/PTBP3/RBM39/SREK1/IK/SRPK2/PTBP1/WTAP/YTHDC1/SF1/TRA2A/SFSWAP/TRA2B/CELF1/SRSF1/SRSF10	19
GO:1903311	BP	GO:1903311	regulation of mRNA metabolic process	35/524	321/13890	1.63853620113463e-08	2.07051392688831e-06	1.84550919496216e-06	HSPB1/SRSF4/PAPOLA/JMJD6/ALKBH5/SAP18/RBM25/PTBP3/RBM39/SREK1/IK/SRPK2/TOB1/PTBP1/WTAP/UBC/SAFB2/YTHDC1/SF1/TRA2A/SFSWAP/TRA2B/DCP2/PUM1/DIS3/CELF1/HNRNPC/SRSF1/PABPN1/SRSF10/PABPC1/KHSRP/XPO1/RPS27A/NPM1	35
GO:0050684	BP	GO:0050684	regulation of mRNA processing	22/524	145/13890	2.44353249289741e-08	2.99692073393594e-06	2.67124248681757e-06	SRSF4/PAPOLA/JMJD6/SAP18/RBM25/PTBP3/RBM39/SREK1/IK/SRPK2/PTBP1/WTAP/SAFB2/YTHDC1/SF1/TRA2A/SFSWAP/TRA2B/CELF1/SRSF1/PABPN1/SRSF10	22
GO:0034620	BP	GO:0034620	cellular response to unfolded protein	21/524	138/13890	4.82639488559486e-08	5.75030476369445e-06	5.12541363640164e-06	DNAJB9/HSPA5/DNAJC3/HERPUD1/PPP1R15B/SERP1/XBP1/HSP90B1/CALR/ERO1A/PTPN2/ATF4/HSPA9/SEC31A/TMBIM6/ASNS/SRPRA/LMNA/SSR1/PDIA6/CANX	21
GO:0006913	BP	GO:0006913	nucleocytoplasmic transport	34/524	331/13890	1.14181474004616e-07	1.25299143841908e-05	1.11682765847728e-05	UHMK1/UFM1/SRSF4/HSP90AB1/NFKBIA/NXT1/NEUROD1/SRRM1/EIF4E/RBM22/SRSF11/ALKBH5/FIP1L1/KPNA4/ALYREF/CALR/CDKN1A/YTHDC1/DDX39B/HSPA9/NUP93/NUP58/PPP1CC/LMNA/FAM53C/KPNB1/RAB18/SRSF1/UBR5/PABPN1/ANP32B/XPO1/TPR/NPM1	34
GO:0035967	BP	GO:0035967	cellular response to topologically incorrect protein	22/524	158/13890	1.18245517354959e-07	1.26431745479533e-05	1.12692286580394e-05	DNAJB9/HSPA5/DNAJC3/HERPUD1/PPP1R15B/SERP1/XBP1/HSP90B1/CALR/ERO1A/PTPN2/ATF4/HSPA9/CUL3/SEC31A/TMBIM6/ASNS/SRPRA/LMNA/SSR1/PDIA6/CANX	22
GO:0016569	BP	GO:0016569	covalent chromatin modification	41/524	446/13890	1.24588073193132e-07	1.2988306630384e-05	1.15768549064461e-05	VEGFA/KMT2E/KDM5B/ING2/UIMC1/MEAF6/MORF4L1/PHF1/JMJD6/MTF2/NSD3/EPC1/RCOR3/TBL1XR1/CHEK1/ARID4B/MIER1/TRMT112/ATF2/WAC/TAF7/BRD4/UBE2B/CHD1/MBIP/BAZ1B/BAZ2A/ATF7IP/LMNA/ASH1L/USP15/ZNF451/PAXBP1/RSF1/RLF/SETD5/RYBP/UBR5/SIN3A/NIPBL/KDM3A	41
GO:0051169	BP	GO:0051169	nuclear transport	34/524	334/13890	1.41896474675711e-07	1.44319097414076e-05	1.28635802844656e-05	UHMK1/UFM1/SRSF4/HSP90AB1/NFKBIA/NXT1/NEUROD1/SRRM1/EIF4E/RBM22/SRSF11/ALKBH5/FIP1L1/KPNA4/ALYREF/CALR/CDKN1A/YTHDC1/DDX39B/HSPA9/NUP93/NUP58/PPP1CC/LMNA/FAM53C/KPNB1/RAB18/SRSF1/UBR5/PABPN1/ANP32B/XPO1/TPR/NPM1	34
GO:0006457	BP	GO:0006457	protein folding	25/524	204/13890	2.07655070903072e-07	2.06171820396622e-05	1.83766931167606e-05	HSPA5/DNAJC3/HSPB1/PDCL/DNAJB1/HSP90AB1/PPIG/HSP90B1/DNAJA2/LMAN1/CALR/ERO1A/NKTR/CCT4/ERP29/PPIB/HSPA9/CHORDC1/DNAJC2/CSNK2A1/HSPH1/PDIA6/CANX/ST13/HSP90AA1	25
GO:2001251	BP	GO:2001251	negative regulation of chromosome organization	20/524	140/13890	2.90996826368172e-07	2.82199247896576e-05	2.5153238528911e-05	DYNC1LI1/PHF1/MTF2/RAD21/TERF2IP/IK/CDT1/TAF7/DCP2/BUB3/UBE2B/ZNF451/HNRNPC/ZNF207/UBR5/SIN3A/KDM3A/TPR/FBXO5/H3-3B	20
GO:0006403	BP	GO:0006403	RNA localization	26/524	224/13890	3.49867116856836e-07	3.31578608475684e-05	2.95545643450117e-05	YY1/SRSF4/NXT1/SRRM1/EIF4E/SRSF11/ALKBH5/FIP1L1/ALYREF/TOMM20/CCT4/YTHDC1/G3BP2/DDX39B/PURA/DCP2/NUP93/BICD1/NUP58/SRSF1/PABPN1/AHCTF1/KHSRP/XPO1/TPR/NPM1	26
GO:0016570	BP	GO:0016570	histone modification	39/524	434/13890	4.58556533242266e-07	4.24929054137833e-05	3.78751606755191e-05	VEGFA/KMT2E/KDM5B/ING2/UIMC1/MEAF6/MORF4L1/PHF1/JMJD6/MTF2/NSD3/EPC1/RCOR3/TBL1XR1/CHEK1/ARID4B/MIER1/TRMT112/ATF2/WAC/TAF7/BRD4/UBE2B/MBIP/BAZ1B/BAZ2A/LMNA/ASH1L/USP15/ZNF451/PAXBP1/RSF1/RLF/SETD5/RYBP/UBR5/SIN3A/NIPBL/KDM3A	39
GO:0034975	BP	GO:0034975	protein folding in endoplasmic reticulum	6/524	10/13890	5.17105960696396e-07	4.68767794805211e-05	4.17826349478026e-05	HSPA5/DNAJC3/HSP90B1/CALR/ERO1A/CANX	6
GO:0097193	BP	GO:0097193	intrinsic apoptotic signaling pathway	28/524	264/13890	8.01436272198202e-07	7.11061543631171e-05	6.33789804508813e-05	DDIT4/HERPUD1/HSPB1/ING2/XBP1/TRIAP1/UBQLN1/BCLAF1/ERO1A/PTPN2/SIAH1/CDKN1A/ERP29/ATF4/VDAC2/DDX3X/CUL3/TMBIM6/TOPORS/GPX1/TPT1/JMY/MSH6/PDK1/RPL11/RPS7/RPS3/RPL26	28
GO:0006984	BP	GO:0006984	ER-nucleus signaling pathway	11/524	47/13890	1.00614871676946e-06	8.74091697693469e-05	7.79103315551089e-05	HSPA5/HERPUD1/INSIG1/PPP1R15B/XBP1/EIF2A/HSP90B1/CALR/PTPN2/ATF4/ASNS	11
GO:0006611	BP	GO:0006611	protein export from nucleus	22/524	180/13890	1.16797888215611e-06	9.9397386501857e-05	8.85957772909396e-05	UHMK1/SRSF4/NXT1/SRRM1/EIF4E/RBM22/SRSF11/ALKBH5/FIP1L1/ALYREF/CALR/YTHDC1/DDX39B/HSPA9/NUP93/NUP58/SRSF1/PABPN1/ANP32B/XPO1/TPR/NPM1	22
GO:0000380	BP	GO:0000380	alternative mRNA splicing, via spliceosome	14/524	81/13890	1.77170736632188e-06	0.000145994802642393	0.000130129407580535	SRSF4/SAP18/RBM25/SREK1/IK/PTBP1/WTAP/YTHDC1/SF1/SFSWAP/TRA2B/CELF1/SRSF1/SRSF10	14
GO:0000381	BP	GO:0000381	regulation of alternative mRNA splicing, via spliceosome	13/524	70/13890	1.7855479459861e-06	0.000145994802642393	0.000130129407580535	SRSF4/SAP18/RBM25/SREK1/IK/PTBP1/WTAP/YTHDC1/SF1/TRA2B/CELF1/SRSF1/SRSF10	13
GO:0006376	BP	GO:0006376	mRNA splice site selection	9/524	32/13890	1.86466167063863e-06	0.000149531522433906	0.000133281788644231	PRPF39/LUC7L2/YTHDC1/SF1/SFSWAP/CELF1/KHDC4/SRSF1/SRSF10	9
GO:0051028	BP	GO:0051028	mRNA transport	19/524	145/13890	2.19575531089861e-06	0.000172760370687683	0.00015398633570572	SRSF4/NXT1/SRRM1/EIF4E/SRSF11/ALKBH5/FIP1L1/ALYREF/YTHDC1/G3BP2/DDX39B/NUP93/NUP58/SRSF1/PABPN1/AHCTF1/KHSRP/XPO1/TPR	19
GO:0071786	BP	GO:0071786	endoplasmic reticulum tubular network organization	7/524	18/13890	2.31454749906546e-06	0.000178734501316721	0.00015931125183626	REEP3/ATL1/TMEM170A/RTN3/RAB18/ARL6IP1/RTN4	7
GO:0050657	BP	GO:0050657	nucleic acid transport	22/524	188/13890	2.43569783192008e-06	0.000181372499269763	0.00016166257602462	SRSF4/NXT1/SRRM1/EIF4E/SRSF11/ALKBH5/FIP1L1/ALYREF/TOMM20/YTHDC1/G3BP2/DDX39B/PURA/NUP93/NUP58/SRSF1/PABPN1/AHCTF1/KHSRP/XPO1/TPR/NPM1	22
GO:0050658	BP	GO:0050658	RNA transport	22/524	188/13890	2.43569783192008e-06	0.000181372499269763	0.00016166257602462	SRSF4/NXT1/SRRM1/EIF4E/SRSF11/ALKBH5/FIP1L1/ALYREF/TOMM20/YTHDC1/G3BP2/DDX39B/PURA/NUP93/NUP58/SRSF1/PABPN1/AHCTF1/KHSRP/XPO1/TPR/NPM1	22
GO:2001242	BP	GO:2001242	regulation of intrinsic apoptotic signaling pathway	19/524	147/13890	2.70297645215927e-06	0.000197744066763231	0.000176255029595095	HERPUD1/HSPB1/ING2/XBP1/TRIAP1/UBQLN1/BCLAF1/PTPN2/SIAH1/ERP29/VDAC2/DDX3X/TMBIM6/GPX1/TPT1/RPL11/RPS7/RPS3/RPL26	19
GO:0051236	BP	GO:0051236	establishment of RNA localization	22/524	191/13890	3.1710961479752e-06	0.000227990878225113	0.000203214891079862	SRSF4/NXT1/SRRM1/EIF4E/SRSF11/ALKBH5/FIP1L1/ALYREF/TOMM20/YTHDC1/G3BP2/DDX39B/PURA/NUP93/NUP58/SRSF1/PABPN1/AHCTF1/KHSRP/XPO1/TPR/NPM1	22
GO:1902275	BP	GO:1902275	regulation of chromatin organization	21/524	177/13890	3.30196274186521e-06	0.000231491861315319	0.000206335418983817	VEGFA/KMT2E/ING2/PHF1/MTF2/NSD3/CHEK1/MIER1/TAF7/BRD4/UBE2B/ATF7IP/LMNA/ZNF451/PAXBP1/SETD5/UBR5/SIN3A/NIPBL/KDM3A/TPR	21
GO:0033119	BP	GO:0033119	negative regulation of RNA splicing	8/524	26/13890	3.33081814842186e-06	0.000231491861315319	0.000206335418983817	SRSF4/SAP18/PTBP3/PTBP1/RPS13/SFSWAP/TMBIM6/SRSF10	8
GO:0031647	BP	GO:0031647	regulation of protein stability	27/524	268/13890	3.39091412630091e-06	0.000231805113224177	0.000206614629507654	HSP90AB1/CDKN2AIP/SUGT1/XBP1/CAMLG/CALR/STXBP1/CCT4/SIAH1/CDKN1A/PPIB/CUL3/PER3/PIM1/UBE2B/ATF7IP/LMNA/RAD23A/ZNF207/FBXO7/RPL5/NAA16/RPL11/RPS7/HSP90AA1/RTN4/GAPDH	27
GO:0031056	BP	GO:0031056	regulation of histone modification	18/524	136/13890	3.50751440188927e-06	0.00023590862993352	0.000210272213125144	VEGFA/KMT2E/ING2/PHF1/MTF2/NSD3/CHEK1/TAF7/BRD4/UBE2B/LMNA/ZNF451/PAXBP1/SETD5/UBR5/SIN3A/NIPBL/KDM3A	18
GO:0050821	BP	GO:0050821	protein stabilization	20/524	166/13890	4.45344678400403e-06	0.000294775763322171	0.000262742198735476	HSP90AB1/SUGT1/CAMLG/CALR/STXBP1/CCT4/CDKN1A/PPIB/PER3/PIM1/UBE2B/ATF7IP/ZNF207/RPL5/NAA16/RPL11/RPS7/HSP90AA1/RTN4/GAPDH	20
GO:0051983	BP	GO:0051983	regulation of chromosome segregation	15/524	100/13890	4.80384556538924e-06	0.000311586810310412	0.000277726373143018	DYNC1LI1/RAD21/CDC42/IK/CDT1/CUL3/SMC5/BUB3/PUM1/CSNK2A1/ZNF207/NIPBL/TPR/FBXO5/NEK2	15
GO:0051168	BP	GO:0051168	nuclear export	22/524	196/13890	4.85686874584575e-06	0.000311586810310412	0.000277726373143018	UHMK1/SRSF4/NXT1/SRRM1/EIF4E/RBM22/SRSF11/ALKBH5/FIP1L1/ALYREF/CALR/YTHDC1/DDX39B/HSPA9/NUP93/NUP58/SRSF1/PABPN1/ANP32B/XPO1/TPR/NPM1	22
GO:0071426	BP	GO:0071426	ribonucleoprotein complex export from nucleus	17/524	126/13890	5.01440826266702e-06	0.000316819431141235	0.000282390360055459	SRSF4/NXT1/SRRM1/EIF4E/SRSF11/ALKBH5/FIP1L1/ALYREF/YTHDC1/DDX39B/NUP93/NUP58/SRSF1/PABPN1/XPO1/TPR/NPM1	17
GO:0071166	BP	GO:0071166	ribonucleoprotein complex localization	17/524	127/13890	5.59103875501849e-06	0.000347979576245181	0.00031016430234046	SRSF4/NXT1/SRRM1/EIF4E/SRSF11/ALKBH5/FIP1L1/ALYREF/YTHDC1/DDX39B/NUP93/NUP58/SRSF1/PABPN1/XPO1/TPR/NPM1	17
GO:2001252	BP	GO:2001252	positive regulation of chromosome organization	20/524	170/13890	6.41739131344759e-06	0.000393537084957007	0.000350771032937824	VEGFA/KMT2E/ING2/PHF1/MTF2/RAD21/NSD3/CCT4/MIER1/CDT1/CUL3/SMC5/BRD4/ATF7IP/LMNA/PAXBP1/SIN3A/NIPBL/TPR/NEK2	20
GO:0000245	BP	GO:0000245	spliceosomal complex assembly	11/524	58/13890	9.03177320661746e-06	0.000545833250312968	0.000486517028109325	PRPF39/LUC7L2/SRPK2/YTHDC1/SF1/DDX39B/SFSWAP/CELF1/KHDC4/SRSF1/SRSF10	11
GO:0010639	BP	GO:0010639	negative regulation of organelle organization	33/524	386/13890	1.02918471543162e-05	0.000613100037621408	0.000546473869201361	INSIG1/FNIP1/DYNC1LI1/PHF1/TRIAP1/LMAN1/MTF2/RAD21/TERF2IP/IK/CHEK1/CDT1/RAD1/TAF7/DCP2/BUB3/UBE2B/LMNA/ZNF451/GPX1/HNRNPC/ZNF207/UBR5/SIN3A/TFRC/SLC25A5/KDM3A/TPR/FBXO5/H3-3B/NPM1/TPX2/NEK2	33
GO:0045931	BP	GO:0045931	positive regulation of mitotic cell cycle	17/524	135/13890	1.28107470051188e-05	0.000752405845230219	0.000670641181246473	KMT2E/EIF4E/DYNC1LI1/RAB11A/APP/CDT1/DDX3X/CUL3/SMC5/BRD4/ASNS/PHIP/PAFAH1B1/SIN3A/NIPBL/TPR/FBXO5	17
GO:0006406	BP	GO:0006406	mRNA export from nucleus	15/524	109/13890	1.40927138910069e-05	0.000791572718762966	0.000705551753111709	SRSF4/NXT1/SRRM1/EIF4E/SRSF11/ALKBH5/FIP1L1/ALYREF/YTHDC1/DDX39B/NUP93/NUP58/SRSF1/PABPN1/TPR	15
GO:0071427	BP	GO:0071427	mRNA-containing ribonucleoprotein complex export from nucleus	15/524	109/13890	1.40927138910069e-05	0.000791572718762966	0.000705551753111709	SRSF4/NXT1/SRRM1/EIF4E/SRSF11/ALKBH5/FIP1L1/ALYREF/YTHDC1/DDX39B/NUP93/NUP58/SRSF1/PABPN1/TPR	15
GO:0006405	BP	GO:0006405	RNA export from nucleus	17/524	136/13890	1.41397802341517e-05	0.000791572718762966	0.000705551753111709	SRSF4/NXT1/SRRM1/EIF4E/SRSF11/ALKBH5/FIP1L1/ALYREF/YTHDC1/DDX39B/NUP93/NUP58/SRSF1/PABPN1/XPO1/TPR/NPM1	17
GO:0045292	BP	GO:0045292	mRNA cis splicing, via spliceosome	8/524	31/13890	1.42369194022116e-05	0.000791572718762966	0.000705551753111709	SRSF4/RBM22/WBP11/PRPF39/PRPF40A/SFSWAP/SRSF1/SRSF10	8
GO:1905269	BP	GO:1905269	positive regulation of chromatin organization	14/524	97/13890	1.56245484695469e-05	0.000835312398948855	0.000744538200350475	VEGFA/KMT2E/ING2/PHF1/MTF2/NSD3/MIER1/BRD4/ATF7IP/LMNA/PAXBP1/SIN3A/NIPBL/TPR	14
GO:0075522	BP	GO:0075522	IRES-dependent viral translational initiation	5/524	10/13890	1.61418270730055e-05	0.000852043277144719	0.000759450917985108	PTBP1/EIF3F/EIF3A/EIF3B/PCBP2	5
GO:0042255	BP	GO:0042255	ribosome assembly	11/524	62/13890	1.75898290103658e-05	0.000916869837165318	0.000817232713626338	SBDS/BRIX1/EIF2A/RPL24/DDX3X/RPL5/RPL12/RPLP0/RPS10/RPL11/NPM1	11
GO:0015931	BP	GO:0015931	nucleobase-containing compound transport	24/524	246/13890	2.02379236305365e-05	0.0010418782906091	0.000928656378679981	SRSF4/SLC25A36/NXT1/SRRM1/EIF4E/SRSF11/ALKBH5/FIP1L1/ALYREF/TOMM20/YTHDC1/G3BP2/DDX39B/PURA/NUP93/NUP58/SRSF1/PABPN1/AHCTF1/KHSRP/SLC25A5/XPO1/TPR/NPM1	24
GO:0090307	BP	GO:0090307	mitotic spindle assembly	11/524	63/13890	2.05965052676811e-05	0.00104740764592964	0.000933584853660873	RAB11A/CCSAP/GOLGA2/XIAP/RHOA/SMC3/KPNB1/ZNF207/TPR/TPX2/NEK2	11
GO:0051783	BP	GO:0051783	regulation of nuclear division	19/524	169/13890	2.08941706451732e-05	0.00104974327217316	0.000935666665163053	DYNC1LI1/RAD21/CALR/CDC42/IK/CHEK1/CDT1/RAD1/CUL3/CCSAP/SMC5/BUB3/UBE2B/PHIP/ZNF207/NIPBL/TPR/FBXO5/NEK2	19
GO:0007029	BP	GO:0007029	endoplasmic reticulum organization	11/524	64/13890	2.40378797789442e-05	0.00117820497428813	0.00105016831104668	TRAM1/TMEM38B/LMAN1/REEP3/SEC31A/ATL1/TMEM170A/RTN3/RAB18/ARL6IP1/RTN4	11
GO:0036499	BP	GO:0036499	PERK-mediated unfolded protein response	6/524	17/13890	2.42987116999471e-05	0.00117820497428813	0.00105016831104668	HSPA5/HERPUD1/PPP1R15B/PTPN2/ATF4/ASNS	6
GO:0140467	BP	GO:0140467	integrated stress response signaling	6/524	17/13890	2.42987116999471e-05	0.00117820497428813	0.00105016831104668	HSPA5/HERPUD1/PPP1R15B/PTPN2/ATF4/ASNS	6
GO:0007568	BP	GO:0007568	aging	24/524	250/13890	2.63990323884489e-05	0.0012653329317222	0.00112782798988037	JUN/RSL1D1/SERP1/NAMPT/ING2/HMGCR/APP/CALR/ERO1A/RWDD1/CHEK1/YPEL3/CDKN1A/MARCHF5/SMC5/LMNA/FOXO3/CANX/MSH6/SIN3A/CACYBP/FBXO5/JUND/NPM1	24
GO:0016126	BP	GO:0016126	sterol biosynthetic process	11/524	65/13890	2.79652110115394e-05	0.00132046906653084	0.00117697242810057	MSMO1/INSIG1/FDFT1/HMGCR/CNBP/SQLE/HMGCS1/EBP/MVD/KPNB1/SCD	11
GO:0090068	BP	GO:0090068	positive regulation of cell cycle process	24/524	251/13890	2.81826731226007e-05	0.00132046906653084	0.00117697242810057	GADD45A/KMT2E/DYNC1LI1/RAB11A/TRIAP1/APP/RAD21/CDC42/CDKN1A/CDT1/DDX3X/CUL3/SMC5/BRD4/UBE2B/PHIP/CNOT4/RHOA/SIN3A/NIPBL/TPR/FBXO5/RPL26/NPM1	24
GO:0002183	BP	GO:0002183	cytoplasmic translational initiation	8/524	35/13890	3.71828900220758e-05	0.00172280723768951	0.00153558812477134	EIF4A2/EIF4H/EIF3H/EIF3F/EIF3A/EIF4B/EIF3B/EIF3E	8
GO:0031396	BP	GO:0031396	regulation of protein ubiquitination	20/524	192/13890	3.89111752375974e-05	0.00178307253561298	0.00158930433503709	HSPA5/HERPUD1/HSP90AB1/RAB1A/CAMLG/UBQLN1/DDX3X/CUL3/TOPORS/GOLGA2/XIAP/CRY1/FEM1B/RPL5/UBR5/RPL11/RPS7/HSP90AA1/FBXO5/RPS3	20
GO:0061077	BP	GO:0061077	chaperone-mediated protein folding	10/524	56/13890	3.99450072225295e-05	0.00181055087084726	0.00161379657325803	HSPA5/HSPB1/DNAJB1/ERO1A/PPIB/HSPA9/CHORDC1/CSNK2A1/HSPH1/ST13	10
GO:0006997	BP	GO:0006997	nucleus organization	15/524	119/13890	4.06315631508256e-05	0.0018218668638596	0.00162388284646933	PPP2R2A/SRPK2/REEP3/PPP2CA/SF1/TMF1/NUP93/LMNA/PAFAH1B1/TMEM170A/AHCTF1/KDM3A/TPR/H3-3B/RTN4	15
GO:0045841	BP	GO:0045841	negative regulation of mitotic metaphase/anaphase transition	8/524	36/13890	4.62439222477416e-05	0.0020298647976114	0.00180927744550444	DYNC1LI1/RAD21/IK/CDT1/BUB3/ZNF207/TPR/FBXO5	8
GO:1902100	BP	GO:1902100	negative regulation of metaphase/anaphase transition of cell cycle	8/524	36/13890	4.62439222477416e-05	0.0020298647976114	0.00180927744550444	DYNC1LI1/RAD21/IK/CDT1/BUB3/ZNF207/TPR/FBXO5	8
GO:0034976	BP	GO:0034976	response to endoplasmic reticulum stress	25/524	277/13890	5.06080033365596e-05	0.00219828514493181	0.00195939539233982	JUN/DNAJB9/HSPA5/DNAJC3/HERPUD1/PPP1R15B/SERP1/UFM1/XBP1/HSP90B1/CALR/UBQLN1/ERO1A/PTPN2/ERP29/ATF4/DDX3X/SEC31A/TMBIM6/ASNS/SRPRA/LMNA/SSR1/PDIA6/CANX	25
GO:0051784	BP	GO:0051784	negative regulation of nuclear division	10/524	58/13890	5.47078598740172e-05	0.00232787526198624	0.00207490282723045	DYNC1LI1/RAD21/IK/CHEK1/CDT1/RAD1/BUB3/ZNF207/TPR/FBXO5	10
GO:0033047	BP	GO:0033047	regulation of mitotic sister chromatid segregation	11/524	70/13890	5.70239523091417e-05	0.00237789881129121	0.00211949026951136	DYNC1LI1/RAD21/IK/CDT1/CUL3/SMC5/BUB3/ZNF207/NIPBL/TPR/FBXO5	11
GO:1905819	BP	GO:1905819	negative regulation of chromosome separation	8/524	38/13890	6.99317201724759e-05	0.00285897326587475	0.00254828590226019	DYNC1LI1/RAD21/IK/CDT1/BUB3/ZNF207/TPR/FBXO5	8
GO:2000816	BP	GO:2000816	negative regulation of mitotic sister chromatid separation	8/524	38/13890	6.99317201724759e-05	0.00285897326587475	0.00254828590226019	DYNC1LI1/RAD21/IK/CDT1/BUB3/ZNF207/TPR/FBXO5	8
GO:0042254	BP	GO:0042254	ribosome biogenesis	26/524	300/13890	7.11240179063249e-05	0.00287948693853762	0.00256657033446329	RSL1D1/SBDS/BRIX1/RIOK3/EIF2A/MPHOSPH10/WBP11/GLUL/RPS8/RPL24/DDX3X/TRMT112/NSA2/DIS3/GNL2/RPL14/RPL5/RPS24/RPL12/RPLP0/RPS10/RPL11/XPO1/RPS7/RPL26/NPM1	26
GO:0042273	BP	GO:0042273	ribosomal large subunit biogenesis	11/524	72/13890	7.4408533652794e-05	0.00298349601280914	0.00265927664299611	RSL1D1/BRIX1/RPL24/NSA2/RPL14/RPL5/RPL12/RPLP0/RPL11/RPL26/NPM1	11
GO:0140014	BP	GO:0140014	mitotic nuclear division	24/524	270/13890	9.05001762528255e-05	0.00359414985689793	0.00320357014885942	DYNC1LI1/RAB11A/RAD21/CDC42/IK/CHEK1/CDT1/CENPC/CUL3/CCSAP/SMC5/BUB3/PHIP/GOLGA2/XIAP/RHOA/SMC3/KPNB1/ZNF207/NIPBL/TPR/FBXO5/TPX2/NEK2	24
GO:1905818	BP	GO:1905818	regulation of chromosome separation	10/524	62/13890	9.84776097227321e-05	0.00387407200513012	0.00345307288908607	DYNC1LI1/RAD21/IK/CDT1/CUL3/BUB3/CSNK2A1/ZNF207/TPR/FBXO5	10
GO:0045839	BP	GO:0045839	negative regulation of mitotic nuclear division	9/524	51/13890	0.000106791860095494	0.00416188837942252	0.00370961198226453	DYNC1LI1/RAD21/IK/CHEK1/CDT1/BUB3/ZNF207/TPR/FBXO5	9
GO:0006999	BP	GO:0006999	nuclear pore organization	5/524	14/13890	0.000113073873694651	0.0043659079009879	0.00389146050697672	NUP93/TMEM170A/AHCTF1/TPR/RTN4	5
GO:0031057	BP	GO:0031057	negative regulation of histone modification	8/524	41/13890	0.000123690507218083	0.00460158270948446	0.00410152430826445	PHF1/MTF2/TAF7/UBE2B/ZNF451/UBR5/SIN3A/KDM3A	8
GO:0033048	BP	GO:0033048	negative regulation of mitotic sister chromatid segregation	8/524	41/13890	0.000123690507218083	0.00460158270948446	0.00410152430826445	DYNC1LI1/RAD21/IK/CDT1/BUB3/ZNF207/TPR/FBXO5	8
GO:0034063	BP	GO:0034063	stress granule assembly	6/524	22/13890	0.00012469516694766	0.00460158270948446	0.00410152430826445	G3BP2/DDX3X/BICD1/PRRC2C/G3BP1/ATXN2L	6
GO:0042026	BP	GO:0042026	protein refolding	6/524	22/13890	0.00012469516694766	0.00460158270948446	0.00410152430826445	HSPA5/PDCL/DNAJA2/HSPA9/ST13/HSP90AA1	6
GO:0048025	BP	GO:0048025	negative regulation of mRNA splicing, via spliceosome	6/524	22/13890	0.00012469516694766	0.00460158270948446	0.00410152430826445	SRSF4/SAP18/PTBP3/PTBP1/SFSWAP/SRSF10	6
GO:0019081	BP	GO:0019081	viral translation	5/524	15/13890	0.000164369595292668	0.00601246677517917	0.00535908625095485	PTBP1/EIF3F/EIF3A/EIF3B/PCBP2	5
GO:0036498	BP	GO:0036498	IRE1-mediated unfolded protein response	10/524	66/13890	0.000168839234627548	0.00612225746432066	0.0054569458807311	DNAJB9/HSPA5/DNAJC3/SERP1/XBP1/SEC31A/SRPRA/LMNA/SSR1/PDIA6	10
GO:0007088	BP	GO:0007088	regulation of mitotic nuclear division	16/524	150/13890	0.000172362334820604	0.00619612876036138	0.00552278951226455	DYNC1LI1/RAD21/CDC42/IK/CHEK1/CDT1/CUL3/CCSAP/SMC5/BUB3/PHIP/ZNF207/NIPBL/TPR/FBXO5/NEK2	16
GO:0033046	BP	GO:0033046	negative regulation of sister chromatid segregation	8/524	43/13890	0.000175681732509756	0.00620841376750579	0.00553373949591391	DYNC1LI1/RAD21/IK/CDT1/BUB3/ZNF207/TPR/FBXO5	8
GO:0051985	BP	GO:0051985	negative regulation of chromosome segregation	8/524	43/13890	0.000175681732509756	0.00620841376750579	0.00553373949591391	DYNC1LI1/RAD21/IK/CDT1/BUB3/ZNF207/TPR/FBXO5	8
GO:0030522	BP	GO:0030522	intracellular receptor signaling pathway	21/524	232/13890	0.00019118403257507	0.00669947408267264	0.00597143581621029	RIOK3/UFM1/NFKBIA/NR1D2/CALR/RWDD1/UBC/SAFB2/TMF1/TAF7/PUM1/PIM1/CRKL/USP15/XIAP/CRY1/RHOA/UBR5/RORA/KDM3A/RPS27A	21
GO:0030071	BP	GO:0030071	regulation of mitotic metaphase/anaphase transition	9/524	55/13890	0.000195227469063862	0.00671915126967594	0.00598897466445178	DYNC1LI1/RAD21/IK/CDT1/CUL3/BUB3/ZNF207/TPR/FBXO5	9
GO:1902099	BP	GO:1902099	regulation of metaphase/anaphase transition of cell cycle	9/524	55/13890	0.000195227469063862	0.00671915126967594	0.00598897466445178	DYNC1LI1/RAD21/IK/CDT1/CUL3/BUB3/ZNF207/TPR/FBXO5	9
GO:0033045	BP	GO:0033045	regulation of sister chromatid segregation	11/524	80/13890	0.000196579485587641	0.00671915126967594	0.00598897466445178	DYNC1LI1/RAD21/IK/CDT1/CUL3/SMC5/BUB3/ZNF207/NIPBL/TPR/FBXO5	11
GO:1904666	BP	GO:1904666	regulation of ubiquitin protein ligase activity	6/524	24/13890	0.000210935362189672	0.00715122325472304	0.00637409297297162	RAB1A/GOLGA2/RPL5/RPL11/RPS7/FBXO5	6
GO:0019058	BP	GO:0019058	viral life cycle	24/524	286/13890	0.000218446855610547	0.00734615635399986	0.00654784250560987	VAPA/HSP90AB1/RAB1A/IST1/CDC42/SNX3/SRPK2/UBC/DDX3X/PPIB/NUP93/NUP58/SCARB2/CXCR4/RAD23A/KPNB1/PCBP2/LDLR/PABPC1/TFRC/PCBP1/XPO1/TPR/RPS27A	24
GO:0001732	BP	GO:0001732	formation of cytoplasmic translation initiation complex	5/524	16/13890	0.000231701846660051	0.0077295736045793	0.00688959343626644	EIF3H/EIF3F/EIF3A/EIF3B/EIF3E	5
GO:0034504	BP	GO:0034504	protein localization to nucleus	22/524	253/13890	0.00024061257217991	0.00796313036500179	0.00709776935979335	UFM1/HSP90AB1/NFKBIA/NXT1/RBM22/GLUL/KPNA4/CALR/CCT4/CDKN1A/NUP93/TOPORS/NUP58/LMNA/FAM53C/KPNB1/UBR5/SIN3A/TFRC/RPL11/XPO1/TPR	22
GO:0010256	BP	GO:0010256	endomembrane system organization	31/524	416/13890	0.000244659909972507	0.00803332145342798	0.00716033271539927	UGCG/SERP1/RAB1A/TRAM1/TMEM38B/RAB11A/IST1/LMAN1/TMED9/CDC42/PPP2R2A/SNX3/REEP3/PPP2CA/SEC31A/TMF1/ATL1/NUP93/RAB3A/GOLGA2/SCARB2/CXCR4/LMNA/PAFAH1B1/TMEM170A/AKAP9/RTN3/RAB18/GOLGB1/ARL6IP1/RTN4	31
GO:0051225	BP	GO:0051225	spindle assembly	13/524	110/13890	0.000252096262139649	0.00819675398647806	0.00730600487851925	RAB11A/CCSAP/GOLGA2/XIAP/RHOA/SMC3/KPNB1/ZNF207/TPR/FBXO5/RPS3/TPX2/NEK2	13
GO:0007059	BP	GO:0007059	chromosome segregation	25/524	307/13890	0.000258225620074385	0.00819675398647806	0.00730600487851925	RIOK3/CCNB1IP1/DYNC1LI1/RAB11A/RAD21/CDC42/IK/CDT1/CENPC/DDX3X/CUL3/SMC5/BUB3/PUM1/UBE2B/CSNK2A1/SMC3/KPNB1/ZNF207/NIPBL/SLC25A5/TPR/FBXO5/RPS3/NEK2	25
GO:0018205	BP	GO:0018205	peptidyl-lysine modification	29/524	380/13890	0.000259465593816572	0.00819675398647806	0.00730600487851925	CSKMT/KMT2E/MEAF6/MORF4L1/PHF1/JMJD6/MTF2/NSD3/EPC1/CHEK1/ARID4B/TRMT112/ATF2/TAF7/NUP93/BRD4/TOPORS/NUP58/MBIP/LMNA/ASH1L/ZNF451/RSF1/RLF/SETD5/SIN3A/KDM3A/SUMO2/TPR	29
GO:0045727	BP	GO:0045727	positive regulation of translation	14/524	126/13890	0.00028343995137285	0.0088727426633431	0.00790853321829218	DNAJC3/UHMK1/SERP1/CNBP/DDX3X/DDX39B/RHOA/RPL5/EIF3E/PABPC1/RPL30/RPL26/NPM1/PKM	14
GO:2000059	BP	GO:2000059	negative regulation of ubiquitin-dependent protein catabolic process	8/524	46/13890	0.000286247517099064	0.0088727426633431	0.00790853321829218	HSP90AB1/CAMLG/WAC/CSNK2A1/RPL5/RYBP/RPL11/RPS7	8
GO:1903320	BP	GO:1903320	regulation of protein modification by small protein conjugation or removal	20/524	222/13890	0.000287247064640604	0.0088727426633431	0.00790853321829218	HSPA5/HERPUD1/HSP90AB1/RAB1A/CAMLG/UBQLN1/DDX3X/CUL3/TOPORS/GOLGA2/XIAP/CRY1/FEM1B/RPL5/UBR5/RPL11/RPS7/HSP90AA1/FBXO5/RPS3	20
GO:0031570	BP	GO:0031570	DNA integrity checkpoint	16/524	157/13890	0.000291626472957648	0.00894178229583375	0.00797007024778215	GADD45A/SYF2/UIMC1/TRIAP1/CDC5L/CHEK1/CDKN1A/CDT1/RAD1/DDX39B/ATF2/WAC/CRY1/CNOT4/FEM1B/RPL26	16
GO:0019218	BP	GO:0019218	regulation of steroid metabolic process	12/524	98/13890	0.0003103653069345	0.00944688561983113	0.00842028350968666	STARD4/INSIG1/FDFT1/HMGCR/SF1/SQLE/HMGCS1/MVD/KPNB1/LDLR/SCD/RORA	12
GO:0010965	BP	GO:0010965	regulation of mitotic sister chromatid separation	9/524	59/13890	0.000337542745455116	0.0100073390485576	0.00891983192741555	DYNC1LI1/RAD21/IK/CDT1/CUL3/BUB3/ZNF207/TPR/FBXO5	9
GO:0006735	BP	GO:0006735	NADH regeneration	6/524	26/13890	0.000338377651282162	0.0100073390485576	0.00891983192741555	ALDOC/ALDOA/GPI/PKM/TPI1/GAPDH	6
GO:0036500	BP	GO:0036500	ATF6-mediated unfolded protein response	4/524	10/13890	0.000350696152043456	0.0102265940840644	0.00911526030817404	HSPA5/XBP1/HSP90B1/CALR	4
GO:0000280	BP	GO:0000280	nuclear division	29/524	389/13890	0.000382578535561952	0.0110788367589815	0.00987488895518461	CCNB1IP1/ING2/DYNC1LI1/RAB11A/RAD21/CALR/CDC42/IK/CHEK1/CDT1/CENPC/RAD1/CUL3/CCSAP/SMC5/BUB3/UBE2B/PHIP/GOLGA2/XIAP/RHOA/SMC3/KPNB1/ZNF207/NIPBL/TPR/FBXO5/TPX2/NEK2	29
GO:0031062	BP	GO:0031062	positive regulation of histone methylation	7/524	37/13890	0.000401618023153526	0.0115499803900014	0.0102948329564799	KMT2E/PHF1/MTF2/NSD3/BRD4/LMNA/PAXBP1	7
GO:0006900	BP	GO:0006900	vesicle budding from membrane	12/524	101/13890	0.000411210621489205	0.0117448513123972	0.0104685270690583	ARF1/INSIG1/VAPA/TFG/RAB1A/LMAN1/TMED9/ARFGAP3/SNX3/CUL3/SEC31A/GOLGA2	12
GO:0071353	BP	GO:0071353	cellular response to interleukin-4	6/524	27/13890	0.000421330330348761	0.011871266740232	0.0105812048112481	HSPA5/NFIL3/HSP90AB1/XBP1/IMPDH2/PTPN2	6
GO:0048194	BP	GO:0048194	Golgi vesicle budding	10/524	74/13890	0.000439130576626766	0.012259074728458	0.0109268693338849	INSIG1/VAPA/TFG/RAB1A/LMAN1/TMED9/ARFGAP3/CUL3/SEC31A/GOLGA2	10
GO:0000077	BP	GO:0000077	DNA damage checkpoint	15/524	147/13890	0.00044097391109561	0.012259074728458	0.0109268693338849	GADD45A/SYF2/UIMC1/TRIAP1/CDC5L/CHEK1/CDKN1A/RAD1/DDX39B/ATF2/WAC/CRY1/CNOT4/FEM1B/RPL26	15
GO:0006606	BP	GO:0006606	protein import into nucleus	14/524	132/13890	0.000458300114182644	0.0126563673916664	0.0112809878227878	UFM1/HSP90AB1/NFKBIA/NXT1/RBM22/KPNA4/CDKN1A/NUP93/NUP58/LMNA/FAM53C/KPNB1/UBR5/TPR	14
GO:0006458	BP	GO:0006458	'de novo' protein folding	7/524	38/13890	0.000476514930278279	0.013072810916187	0.0116521760305582	HSPA5/DNAJB1/ERO1A/HSPA9/DNAJC2/HSPH1/ST13	7
GO:0050810	BP	GO:0050810	regulation of steroid biosynthetic process	10/524	75/13890	0.000489934806810024	0.0133503188247569	0.0118995268888594	STARD4/INSIG1/FDFT1/HMGCR/SF1/SQLE/HMGCS1/MVD/KPNB1/SCD	10
GO:0051306	BP	GO:0051306	mitotic sister chromatid separation	9/524	62/13890	0.000493033357077354	0.0133503188247569	0.0118995268888594	DYNC1LI1/RAD21/IK/CDT1/CUL3/BUB3/ZNF207/TPR/FBXO5	9
GO:1990823	BP	GO:1990823	response to leukemia inhibitory factor	11/524	89/13890	0.000505078988735142	0.0135011498911894	0.012033966998811	EIF4A2/KDM5B/RNMT/XBP1/MTF2/BCLAF1/RNF138/CACYBP/TFRC/SLC25A5/KDM3A	11
GO:1990830	BP	GO:1990830	cellular response to leukemia inhibitory factor	11/524	89/13890	0.000505078988735142	0.0135011498911894	0.012033966998811	EIF4A2/KDM5B/RNMT/XBP1/MTF2/BCLAF1/RNF138/CACYBP/TFRC/SLC25A5/KDM3A	11
GO:0051438	BP	GO:0051438	regulation of ubiquitin-protein transferase activity	8/524	50/13890	0.000516050670366983	0.0135350866042981	0.0120642157767958	RAB1A/TOPORS/GOLGA2/FEM1B/RPL5/RPL11/RPS7/FBXO5	8
GO:0000027	BP	GO:0000027	ribosomal large subunit assembly	6/524	28/13890	0.000519331860116953	0.0135350866042981	0.0120642157767958	BRIX1/RPL24/RPL5/RPL12/RPLP0/RPL11	6
GO:0033135	BP	GO:0033135	regulation of peptidyl-serine phosphorylation	12/524	105/13890	0.000587569851395232	0.0152184241013548	0.0135646233754597	GADD45A/VEGFA/DDIT4/HSP90AB1/FNIP1/APP/GGNBP2/TERF2IP/RICTOR/AKAP9/TFRC/HSP90AA1	12
GO:0051085	BP	GO:0051085	chaperone cofactor-dependent protein refolding	6/524	29/13890	0.000634179794634055	0.016125181363561	0.0143728424573354	HSPA5/DNAJB1/ERO1A/HSPA9/HSPH1/ST13	6
GO:0070670	BP	GO:0070670	response to interleukin-4	6/524	29/13890	0.000634179794634055	0.016125181363561	0.0143728424573354	HSPA5/NFIL3/HSP90AB1/XBP1/IMPDH2/PTPN2	6
GO:0051170	BP	GO:0051170	import into nucleus	15/524	153/13890	0.00067349463200896	0.0170210461544083	0.0151713527631492	UFM1/HSP90AB1/NFKBIA/NXT1/RBM22/KPNA4/CDKN1A/NUP93/NUP58/LMNA/FAM53C/KPNB1/RAB18/UBR5/TPR	15
GO:0031503	BP	GO:0031503	protein-containing complex localization	22/524	274/13890	0.000718917556987659	0.018001938532817	0.0160456506271303	SRSF4/STX3/NXT1/SRRM1/EIF4E/SRSF11/RAB11A/ALKBH5/FIP1L1/ALYREF/YTHDC1/DDX39B/PURA/NUP93/NUP58/DYNLL2/KIF5B/SRSF1/PABPN1/XPO1/TPR/NPM1	22
GO:0034250	BP	GO:0034250	positive regulation of cellular amide metabolic process	15/524	154/13890	0.000720940943640394	0.018001938532817	0.0160456506271303	DNAJC3/UHMK1/SERP1/CNBP/APP/DDX3X/DDX39B/RHOA/RPL5/EIF3E/PABPC1/RPL30/RPL26/NPM1/PKM	15
GO:0043555	BP	GO:0043555	regulation of translation in response to stress	5/524	20/13890	0.000725676113747861	0.0180123178233844	0.0160549019902487	DNAJC3/PPP1R15B/ATF4/DDX3X/NPM1	5
GO:1900034	BP	GO:1900034	regulation of cellular response to heat	10/524	79/13890	0.000744434042480181	0.0183685796280613	0.0163724484833231	IER5/DNAJB1/HSP90AB1/CHORDC1/NUP93/NUP58/DNAJC2/HSPH1/HSP90AA1/TPR	10
GO:0045540	BP	GO:0045540	regulation of cholesterol biosynthetic process	7/524	41/13890	0.000769869782119344	0.0187086374400004	0.0166755518870734	FDFT1/HMGCR/SQLE/HMGCS1/MVD/KPNB1/SCD	7
GO:0106118	BP	GO:0106118	regulation of sterol biosynthetic process	7/524	41/13890	0.000769869782119344	0.0187086374400004	0.0166755518870734	FDFT1/HMGCR/SQLE/HMGCS1/MVD/KPNB1/SCD	7
GO:0090181	BP	GO:0090181	regulation of cholesterol metabolic process	8/524	53/13890	0.000771675213352535	0.0187086374400004	0.0166755518870734	FDFT1/HMGCR/SQLE/HMGCS1/MVD/KPNB1/LDLR/SCD	8
GO:0006479	BP	GO:0006479	protein methylation	16/524	172/13890	0.000803213246614493	0.0192494209102439	0.017157567899551	CSKMT/KMT2E/PHF1/MTF2/NSD3/ARID4B/TRMT112/RAB6A/BRD4/PCMTD1/LMNA/ASH1L/PAXBP1/RLF/SETD5/KDM3A	16
GO:0008213	BP	GO:0008213	protein alkylation	16/524	172/13890	0.000803213246614493	0.0192494209102439	0.017157567899551	CSKMT/KMT2E/PHF1/MTF2/NSD3/ARID4B/TRMT112/RAB6A/BRD4/PCMTD1/LMNA/ASH1L/PAXBP1/RLF/SETD5/KDM3A	16
GO:0018022	BP	GO:0018022	peptidyl-lysine methylation	13/524	124/13890	0.000808243513595247	0.0192592882953839	0.0171663629864952	CSKMT/KMT2E/PHF1/MTF2/NSD3/ARID4B/TRMT112/BRD4/LMNA/ASH1L/RLF/SETD5/KDM3A	13
GO:0034968	BP	GO:0034968	histone lysine methylation	12/524	109/13890	0.000823490299902642	0.0194008731671978	0.0172925616946549	KMT2E/PHF1/MTF2/NSD3/ARID4B/TRMT112/BRD4/LMNA/ASH1L/RLF/SETD5/KDM3A	12
GO:0043620	BP	GO:0043620	regulation of DNA-templated transcription in response to stress	12/524	109/13890	0.000823490299902642	0.0194008731671978	0.0172925616946549	JUN/VEGFA/HSPA5/DNAJB1/BCLAF1/CHEK1/UBC/ATF4/TMBIM6/RBPJ/SIN3A/RPS27A	12
GO:0000070	BP	GO:0000070	mitotic sister chromatid segregation	15/524	157/13890	0.000880676172303521	0.0204449007147002	0.0182231337684227	DYNC1LI1/RAB11A/RAD21/IK/CDT1/CENPC/CUL3/SMC5/BUB3/KPNB1/ZNF207/NIPBL/TPR/FBXO5/NEK2	15
GO:0010948	BP	GO:0010948	negative regulation of cell cycle process	24/524	315/13890	0.000882513699915117	0.0204449007147002	0.0182231337684227	GADD45A/HSP90AB1/SYF2/UIMC1/DYNC1LI1/TRIAP1/RAD21/CALR/EPC1/IK/CHEK1/CDKN1A/CDT1/RAD1/BUB3/CNOT4/ZNF207/FBXO7/RYBP/TPR/FBXO5/RPL26/NPM1/NEK2	24
GO:0050686	BP	GO:0050686	negative regulation of mRNA processing	6/524	31/13890	0.000922083116467469	0.0210364740693151	0.0187504202798817	SRSF4/SAP18/PTBP3/PTBP1/SFSWAP/SRSF10	6
GO:1901976	BP	GO:1901976	regulation of cell cycle checkpoint	6/524	31/13890	0.000922083116467469	0.0210364740693151	0.0187504202798817	DYNC1LI1/CDT1/DDX39B/CRY1/FEM1B/TPR	6
GO:1901522	BP	GO:1901522	positive regulation of transcription from RNA polymerase II promoter involved in cellular response to chemical stimulus	5/524	21/13890	0.000923183394408791	0.0210364740693151	0.0187504202798817	VEGFA/XBP1/SMAD5/ATF4/RBPJ	5
GO:0048285	BP	GO:0048285	organelle fission	30/524	432/13890	0.000977792458238475	0.0221597529937741	0.0197516314075518	CCNB1IP1/ING2/DYNC1LI1/RAB11A/RAD21/CALR/CDC42/IK/CHEK1/CDT1/CENPC/RAD1/MARCHF5/CUL3/CCSAP/SMC5/BUB3/UBE2B/PHIP/GOLGA2/XIAP/RHOA/SMC3/KPNB1/ZNF207/NIPBL/TPR/FBXO5/TPX2/NEK2	30
GO:0017148	BP	GO:0017148	negative regulation of translation	13/524	129/13890	0.00116949058443236	0.0263609499301781	0.0234962802482542	EIF4E/CALR/TOB1/ATF4/DDX3X/PURA/PUM1/CELF1/EIF3E/KHSRP/TPR/RPS3/GAPDH	13
GO:0031058	BP	GO:0031058	positive regulation of histone modification	10/524	84/13890	0.0012064141542067	0.0270470270056019	0.0241078006706501	VEGFA/KMT2E/ING2/PHF1/MTF2/NSD3/BRD4/LMNA/PAXBP1/NIPBL	10
GO:0046031	BP	GO:0046031	ADP metabolic process	12/524	114/13890	0.00122483211662567	0.0272779009650633	0.0243135853357664	DDIT4/ALDOC/ALDOA/APP/NUP93/NUP58/AK4/GPI/TPR/PKM/TPI1/GAPDH	12
GO:0017038	BP	GO:0017038	protein import	16/524	179/13890	0.00122979505549926	0.0272779009650633	0.0243135853357664	UFM1/HSP90AB1/NFKBIA/NXT1/RBM22/KPNA4/TOMM20/CDKN1A/NUP93/NUP58/LMNA/FAM53C/KPNB1/UBR5/HSP90AA1/TPR	16
GO:0009150	BP	GO:0009150	purine ribonucleotide metabolic process	26/524	361/13890	0.00124805093598589	0.0275363619209585	0.0245439590919865	DDIT4/ALDOC/ALDOA/IMPDH2/HMGCR/APP/ELOVL5/ACSL3/PANK3/NUP93/BPNT2/NUP58/AK4/HMGCS1/GPI/TECR/MVD/RHOA/FAR1/SCD/PDK1/RORA/TPR/PKM/TPI1/GAPDH	26
GO:1905268	BP	GO:1905268	negative regulation of chromatin organization	8/524	57/13890	0.00126114200524666	0.0276787482204134	0.0246708721358778	PHF1/MTF2/TAF7/UBE2B/ZNF451/UBR5/SIN3A/KDM3A	8
GO:1901989	BP	GO:1901989	positive regulation of cell cycle phase transition	10/524	85/13890	0.00132222020885513	0.0288673207901879	0.0257302813858775	KMT2E/RAB11A/APP/CDT1/DDX3X/CUL3/BRD4/SIN3A/FBXO5/NPM1	10
GO:0045927	BP	GO:0045927	positive regulation of growth	18/524	215/13890	0.00133311588390449	0.0289536106035507	0.025807194002559	VEGFA/SERP1/GOLGA4/CDKN2AIP/RAB11A/IST1/CDC42/DDX3X/PPIB/DDX39B/PIM1/CSNK2A1/RBPJ/CXCR4/PAFAH1B1/RHOA/NIPBL/H3-3B	18
GO:0061647	BP	GO:0061647	histone H3-K9 modification	7/524	45/13890	0.00136457923640589	0.0293450300035443	0.0261560774813871	CHEK1/ARID4B/LMNA/ASH1L/ZNF451/SETD5/KDM3A	7
GO:0009314	BP	GO:0009314	response to radiation	28/524	402/13890	0.0013652124270234	0.0293450300035443	0.0261560774813871	GADD45A/HSPA5/YY1/UNC119/NAMPT/UIMC1/HMGCR/TRIAP1/APP/CHEK1/CDKN1A/RO60/ATF4/RAD1/PER3/UBE2B/PPP1CC/ASNS/HMGCS1/GPX1/CRY1/USP1/MSH6/PPM1D/NIPBL/RPL26/JUND/NPM1	28
GO:0007052	BP	GO:0007052	mitotic spindle organization	12/524	116/13890	0.00142529474405042	0.0303915690668375	0.0270888881421187	SBDS/RAB11A/CCSAP/GOLGA2/XIAP/RHOA/SMC3/KPNB1/ZNF207/TPR/TPX2/NEK2	12
GO:0046364	BP	GO:0046364	monosaccharide biosynthetic process	10/524	86/13890	0.00144691773754252	0.0303915690668375	0.0270888881421187	ALDOC/ALDOA/ARPP19/PTPN2/ATF4/GPI/CRY1/TKT/TPI1/GAPDH	10
GO:0000819	BP	GO:0000819	sister chromatid segregation	16/524	182/13890	0.00146403156991719	0.0303915690668375	0.0270888881421187	DYNC1LI1/RAB11A/RAD21/IK/CDT1/CENPC/CUL3/SMC5/BUB3/SMC3/KPNB1/ZNF207/NIPBL/TPR/FBXO5/NEK2	16
GO:0031124	BP	GO:0031124	mRNA 3'-end processing	11/524	101/13890	0.00146570748817444	0.0303915690668375	0.0270888881421187	SRSF4/PAPOLA/SRRM1/SRSF11/FIP1L1/APP/ALYREF/DDX39B/SRSF1/PABPN1/PABPC1	11
GO:0051052	BP	GO:0051052	regulation of DNA metabolic process	24/524	327/13890	0.00147196706810751	0.0303915690668375	0.0270888881421187	HSP90AB1/UIMC1/ALYREF/PPP4R2/CEBPG/TERF2IP/CCT4/CHEK1/CDKN1A/CDT1/DDX39B/DCP2/DNAJC2/UBE2B/USP1/RLF/HNRNPC/UBR5/MSH6/TFRC/HSP90AA1/RPS3/NPM1/NEK2	24
GO:0043558	BP	GO:0043558	regulation of translational initiation in response to stress	4/524	14/13890	0.00148188047541406	0.0303915690668375	0.0270888881421187	DNAJC3/PPP1R15B/ATF4/NPM1	4
GO:0016575	BP	GO:0016575	histone deacetylation	9/524	72/13890	0.00148299181952513	0.0303915690668375	0.0270888881421187	VEGFA/ING2/MORF4L1/RCOR3/TBL1XR1/MIER1/BAZ2A/SIN3A/NIPBL	9
GO:0019693	BP	GO:0019693	ribose phosphate metabolic process	27/524	385/13890	0.00149679171528295	0.0303915690668375	0.0270888881421187	DDIT4/ALDOC/ALDOA/IMPDH2/HMGCR/APP/ELOVL5/ACSL3/PANK3/NUP93/BPNT2/NUP58/AK4/HMGCS1/GPI/TECR/MVD/RHOA/FAR1/SCD/PDK1/RORA/TKT/TPR/PKM/TPI1/GAPDH	27
GO:0006694	BP	GO:0006694	steroid biosynthetic process	14/524	149/13890	0.00151807433634723	0.0303915690668375	0.0270888881421187	MSMO1/STARD4/ACBD3/INSIG1/FDFT1/HMGCR/CNBP/SF1/SQLE/HMGCS1/EBP/MVD/KPNB1/SCD	14
GO:0006007	BP	GO:0006007	glucose catabolic process	6/524	34/13890	0.00153051067243066	0.0303915690668375	0.0270888881421187	ALDOC/ALDOA/GPI/PKM/TPI1/GAPDH	6
GO:0007094	BP	GO:0007094	mitotic spindle assembly checkpoint	6/524	34/13890	0.00153051067243066	0.0303915690668375	0.0270888881421187	DYNC1LI1/IK/CDT1/BUB3/ZNF207/TPR	6
GO:0008608	BP	GO:0008608	attachment of spindle microtubules to kinetochore	6/524	34/13890	0.00153051067243066	0.0303915690668375	0.0270888881421187	CDC42/CDT1/CENPC/BUB3/ZNF207/NEK2	6
GO:0031577	BP	GO:0031577	spindle checkpoint	6/524	34/13890	0.00153051067243066	0.0303915690668375	0.0270888881421187	DYNC1LI1/IK/CDT1/BUB3/ZNF207/TPR	6
GO:0051084	BP	GO:0051084	'de novo' posttranslational protein folding	6/524	34/13890	0.00153051067243066	0.0303915690668375	0.0270888881421187	HSPA5/DNAJB1/ERO1A/HSPA9/HSPH1/ST13	6
GO:0071173	BP	GO:0071173	spindle assembly checkpoint	6/524	34/13890	0.00153051067243066	0.0303915690668375	0.0270888881421187	DYNC1LI1/IK/CDT1/BUB3/ZNF207/TPR	6
GO:0071174	BP	GO:0071174	mitotic spindle checkpoint	6/524	34/13890	0.00153051067243066	0.0303915690668375	0.0270888881421187	DYNC1LI1/IK/CDT1/BUB3/ZNF207/TPR	6
GO:0016571	BP	GO:0016571	histone methylation	13/524	133/13890	0.00154756874163693	0.0304883875524095	0.0271751852701144	KMT2E/PHF1/MTF2/NSD3/ARID4B/TRMT112/BRD4/LMNA/ASH1L/PAXBP1/RLF/SETD5/KDM3A	13
GO:0006888	BP	GO:0006888	endoplasmic reticulum to Golgi vesicle-mediated transport	16/524	183/13890	0.00155000915134552	0.0304883875524095	0.0271751852701144	ARF1/INSIG1/ARF4/VAPA/TFG/RAB1A/DYNC1LI1/LMAN1/COPB1/TMED9/ARFGAP3/CUL3/SEC31A/GOLGA2/DYNLL2/GOLGB1	16
GO:0090342	BP	GO:0090342	regulation of cell aging	7/524	46/13890	0.00155812595525584	0.0305041560254313	0.0271892401680671	RSL1D1/NAMPT/ING2/YPEL3/MARCHF5/LMNA/FBXO5	7
GO:1905897	BP	GO:1905897	regulation of response to endoplasmic reticulum stress	10/524	87/13890	0.00158100440679138	0.0308074223192526	0.0274595502232187	DNAJB9/HSPA5/DNAJC3/HERPUD1/PPP1R15B/XBP1/UBQLN1/PTPN2/ERP29/TMBIM6	10
GO:0048524	BP	GO:0048524	positive regulation of viral process	11/524	102/13890	0.00158843192804349	0.0308081913485644	0.0274602356813785	JUN/VAPA/POLR2C/SRPK2/DDX3X/PPIB/POLR2A/CHD1/RSF1/RAD23A/PABPC1	11
GO:1901992	BP	GO:1901992	positive regulation of mitotic cell cycle phase transition	9/524	73/13890	0.00163630273285279	0.031589733314797	0.0281568467334464	KMT2E/RAB11A/APP/CDT1/DDX3X/CUL3/BRD4/SIN3A/FBXO5	9
GO:1902652	BP	GO:1902652	secondary alcohol metabolic process	13/524	134/13890	0.00165646068886175	0.0318315256799701	0.0283723632906663	MSMO1/INSIG1/FDFT1/HMGCR/CNBP/APP/SQLE/HMGCS1/EBP/MVD/KPNB1/LDLR/SCD	13
GO:0016050	BP	GO:0016050	vesicle organization	23/524	312/13890	0.00173079238604349	0.0331073589440428	0.0295095505317216	ARF1/INSIG1/STX3/VAPA/TFG/RAB1A/RAB11A/IST1/LMAN1/TMED9/CALR/STXBP1/ARFGAP3/SNX3/CUL3/SEC31A/TMF1/RAB3A/GOLGA2/SCARB2/PAFAH1B1/KIF5B/FBXO5	23
GO:0045070	BP	GO:0045070	positive regulation of viral genome replication	6/524	35/13890	0.00178923535542351	0.0338495999142697	0.030171131464669	VAPA/SRPK2/DDX3X/PPIB/RAD23A/PABPC1	6
GO:1901990	BP	GO:1901990	regulation of mitotic cell cycle phase transition	27/524	390/13890	0.0018017411729503	0.0338495999142697	0.030171131464669	GADD45A/KMT2E/SYF2/DYNC1LI1/RAB11A/TRIAP1/APP/RAD21/IK/CDKN1A/CDT1/DDX3X/CUL3/BUB3/BRD4/PAFAH1B1/AKAP9/CNOT4/ZNF207/FBXO7/SIN3A/HSP90AA1/TPR/FBXO5/RPL26/TPX2/NEK2	27
GO:0043154	BP	GO:0043154	negative regulation of cysteine-type endopeptidase activity involved in apoptotic process	9/524	74/13890	0.00180206503140716	0.0338495999142697	0.030171131464669	VEGFA/HERPUD1/FNIP1/TRIAP1/DDX3X/CSNK2A1/GPX1/XIAP/ARL6IP1	9
GO:0072332	BP	GO:0072332	intrinsic apoptotic signaling pathway by p53 class mediator	9/524	74/13890	0.00180206503140716	0.0338495999142697	0.030171131464669	DDIT4/ING2/TRIAP1/CDKN1A/TOPORS/JMY/RPL11/RPS7/RPL26	9
GO:0043618	BP	GO:0043618	regulation of transcription from RNA polymerase II promoter in response to stress	11/524	104/13890	0.00185912279114536	0.0347647625070679	0.0309868424618091	JUN/VEGFA/HSPA5/DNAJB1/CHEK1/UBC/ATF4/TMBIM6/RBPJ/SIN3A/RPS27A	11
GO:0051304	BP	GO:0051304	chromosome separation	10/524	89/13890	0.00187941286027209	0.0348684474792031	0.0310792598886952	DYNC1LI1/RAD21/IK/CDT1/CUL3/BUB3/CSNK2A1/ZNF207/TPR/FBXO5	10
GO:0072331	BP	GO:0072331	signal transduction by p53 class mediator	20/524	258/13890	0.00188139105103614	0.0348684474792031	0.0310792598886952	GADD45A/DDIT4/ING2/MEAF6/TRIAP1/CHEK1/CDKN1A/RAD1/TAF7/TOPORS/CSNK2A1/CNOT4/FOXO3/RPL5/JMY/PPM1D/RPL11/RPS7/RPL26/TPX2	20
GO:0031060	BP	GO:0031060	regulation of histone methylation	8/524	61/13890	0.0019707304682548	0.0360436230378181	0.0321267279935721	KMT2E/PHF1/MTF2/NSD3/BRD4/LMNA/PAXBP1/KDM3A	8
GO:0090398	BP	GO:0090398	cellular senescence	8/524	61/13890	0.0019707304682548	0.0360436230378181	0.0321267279935721	RSL1D1/NAMPT/ING2/CALR/YPEL3/CDKN1A/SMC5/FBXO5	8
GO:2001243	BP	GO:2001243	negative regulation of intrinsic apoptotic signaling pathway	10/524	90/13890	0.00204480643819317	0.0370732297707197	0.0330444463764764	HERPUD1/HSPB1/ING2/XBP1/TRIAP1/VDAC2/DDX3X/TMBIM6/GPX1/TPT1	10
GO:0006352	BP	GO:0006352	DNA-templated transcription, initiation	18/524	224/13890	0.00210553058678985	0.038008928774518	0.03387846207316	JUN/MED10/TAF1D/NR1D2/POLR2C/BCLAF1/CDKN1A/TAF7/POLR2A/BAZ2A/ATF7IP/RBPJ/ZNF451/BDP1/RSF1/PPM1D/MED13/RORA	18
GO:0009259	BP	GO:0009259	ribonucleotide metabolic process	26/524	375/13890	0.00212961246374684	0.0381136651237095	0.0339718166229505	DDIT4/ALDOC/ALDOA/IMPDH2/HMGCR/APP/ELOVL5/ACSL3/PANK3/NUP93/BPNT2/NUP58/AK4/HMGCS1/GPI/TECR/MVD/RHOA/FAR1/SCD/PDK1/RORA/TPR/PKM/TPI1/GAPDH	26
GO:0016125	BP	GO:0016125	sterol metabolic process	13/524	138/13890	0.00215745877700828	0.0384396451055082	0.0342623720478479	MSMO1/INSIG1/FDFT1/HMGCR/CNBP/APP/SQLE/HMGCS1/EBP/MVD/KPNB1/LDLR/SCD	13
GO:0006757	BP	GO:0006757	ATP generation from ADP	11/524	106/13890	0.00216626297357181	0.0384396451055082	0.0342623720478479	DDIT4/ALDOC/ALDOA/APP/NUP93/NUP58/GPI/TPR/PKM/TPI1/GAPDH	11
GO:0006165	BP	GO:0006165	nucleoside diphosphate phosphorylation	12/524	122/13890	0.00219510746233982	0.0387864327032078	0.0345714739050932	DDIT4/ALDOC/ALDOA/APP/NUP93/NUP58/AK4/GPI/TPR/PKM/TPI1/GAPDH	12
GO:0006998	BP	GO:0006998	nuclear envelope organization	7/524	49/13890	0.00226897660743698	0.0397547582059337	0.0354345705478106	PPP2R2A/REEP3/PPP2CA/NUP93/LMNA/PAFAH1B1/TMEM170A	7
GO:1903573	BP	GO:1903573	negative regulation of response to endoplasmic reticulum stress	7/524	49/13890	0.00226897660743698	0.0397547582059337	0.0354345705478106	DNAJB9/HSPA5/DNAJC3/HERPUD1/PPP1R15B/XBP1/TMBIM6	7
GO:0006163	BP	GO:0006163	purine nucleotide metabolic process	27/524	397/13890	0.00231751728230488	0.0404353433774534	0.0360411958767608	DDIT4/ALDOC/ALDOA/IMPDH2/HMGCR/APP/ELOVL5/ACSL3/PANK3/NUP93/BPNT2/NUP58/AK4/HMGCS1/GPI/TECR/GPX1/MVD/RHOA/FAR1/SCD/PDK1/RORA/TPR/PKM/TPI1/GAPDH	27
GO:0006094	BP	GO:0006094	gluconeogenesis	9/524	77/13890	0.00238129216473098	0.041203271066092	0.036725672127823	ALDOC/ALDOA/ARPP19/PTPN2/ATF4/GPI/CRY1/TPI1/GAPDH	9
GO:1903312	BP	GO:1903312	negative regulation of mRNA metabolic process	9/524	77/13890	0.00238129216473098	0.041203271066092	0.036725672127823	SRSF4/SAP18/PTBP3/TOB1/PTBP1/SFSWAP/HNRNPC/SRSF10/PABPC1	9
GO:0006901	BP	GO:0006901	vesicle coating	8/524	63/13890	0.00242722019542964	0.0414815910448427	0.0369737468078605	TFG/RAB1A/LMAN1/TMED9/ARFGAP3/CUL3/SEC31A/GOLGA2	8
GO:0046939	BP	GO:0046939	nucleotide phosphorylation	12/524	124/13890	0.00251683018806903	0.0428374770785627	0.0381822874073975	DDIT4/ALDOC/ALDOA/APP/NUP93/NUP58/AK4/GPI/TPR/PKM/TPI1/GAPDH	12
GO:0010452	BP	GO:0010452	histone H3-K36 methylation	4/524	16/13890	0.00253739983899697	0.0428378839215278	0.0381826500383478	NSD3/BRD4/ASH1L/SETD5	4
GO:0051444	BP	GO:0051444	negative regulation of ubiquitin-protein transferase activity	4/524	16/13890	0.00253739983899697	0.0428378839215278	0.0381826500383478	RPL5/RPL11/RPS7/FBXO5	4
GO:0043414	BP	GO:0043414	macromolecule methylation	21/524	284/13890	0.00260015566881404	0.0435333197101	0.0388025121535688	CSKMT/KMT2E/RNMT/PHF1/MTF2/NSD3/WTAP/ARID4B/TRMT112/RAB6A/BRD4/PCMTD1/BAZ2A/ATF7IP/LMNA/ASH1L/PAXBP1/RLF/SETD5/PPM1D/KDM3A	21
GO:2000117	BP	GO:2000117	negative regulation of cysteine-type endopeptidase activity	9/524	78/13890	0.00260419053387574	0.0435333197101	0.0388025121535688	VEGFA/HERPUD1/FNIP1/TRIAP1/DDX3X/CSNK2A1/GPX1/XIAP/ARL6IP1	9
GO:1902850	BP	GO:1902850	microtubule cytoskeleton organization involved in mitosis	13/524	141/13890	0.00260991125360311	0.0435333197101	0.0388025121535688	SBDS/RAB11A/CCSAP/GOLGA2/PAFAH1B1/XIAP/RHOA/SMC3/KPNB1/ZNF207/TPR/TPX2/NEK2	13
GO:0009135	BP	GO:0009135	purine nucleoside diphosphate metabolic process	12/524	125/13890	0.00269152460216462	0.044362282968484	0.039541391180542	DDIT4/ALDOC/ALDOA/APP/NUP93/NUP58/AK4/GPI/TPR/PKM/TPI1/GAPDH	12
GO:0009179	BP	GO:0009179	purine ribonucleoside diphosphate metabolic process	12/524	125/13890	0.00269152460216462	0.044362282968484	0.039541391180542	DDIT4/ALDOC/ALDOA/APP/NUP93/NUP58/AK4/GPI/TPR/PKM/TPI1/GAPDH	12
GO:0098813	BP	GO:0098813	nuclear chromosome segregation	19/524	248/13890	0.00275763460112568	0.0452729775066696	0.0403531196708445	CCNB1IP1/DYNC1LI1/RAB11A/RAD21/CDC42/IK/CDT1/CENPC/CUL3/SMC5/BUB3/UBE2B/SMC3/KPNB1/ZNF207/NIPBL/TPR/FBXO5/NEK2	19
GO:0018023	BP	GO:0018023	peptidyl-lysine trimethylation	7/524	51/13890	0.00286649604359811	0.0468756411835456	0.0417816203506499	CSKMT/KMT2E/NSD3/ARID4B/BRD4/LMNA/SETD5	7
GO:0009416	BP	GO:0009416	response to light stimulus	21/524	287/13890	0.00294509009014752	0.0479727565465436	0.0427595111361467	YY1/UNC119/HMGCR/TRIAP1/APP/CHEK1/CDKN1A/RO60/ATF4/PER3/UBE2B/PPP1CC/ASNS/HMGCS1/GPX1/CRY1/USP1/MSH6/RPL26/JUND/NPM1	21
GO:0032786	BP	GO:0032786	positive regulation of DNA-templated transcription, elongation	5/524	27/13890	0.00303904749253846	0.0491194885421913	0.0437816266672921	ALYREF/TCERG1/CCNT2/DDX39B/BRD4	5
GO:1900101	BP	GO:1900101	regulation of endoplasmic reticulum unfolded protein response	5/524	27/13890	0.00303904749253846	0.0491194885421913	0.0437816266672921	DNAJB9/HSPA5/PPP1R15B/XBP1/PTPN2	5
GO:0019319	BP	GO:0019319	hexose biosynthetic process	9/524	80/13890	0.00309943487054853	0.0499020981088315	0.0444791893026086	ALDOC/ALDOA/ARPP19/PTPN2/ATF4/GPI/CRY1/TPI1/GAPDH	9
GO:0022626	CC	GO:0022626	cytosolic ribosome	30/539	104/14516	5.06767431663938e-19	2.57944622716944e-16	2.26711745744393e-16	EIF2A/RPL17/RPS8/RPS15A/RPL24/DDX3X/RPS13/RPL39/RPL14/RPL32/RPL5/RPS24/RPL8/RPL9/RPLP1/RPL12/RPLP0/RPS10/RPL11/RPL15/RPL30/RPL29/RPS7/RPS27A/RPS3A/RPS3/RPL22/RPL26/RPL19/RPL4	30
GO:0016607	CC	GO:0016607	nuclear speck	55/539	378/14516	1.87683351849342e-18	4.77654130456576e-16	4.19818023873528e-16	GADD45A/CCNL1/SMNDC1/KMT2E/SRSF4/NAMPT/PNISR/SYF2/NXT1/PPIG/SRRM1/MORF4L1/SRSF11/CIR1/ALKBH5/SF3B2/BRD2/LUC7L2/SAP18/RBM25/ALYREF/FNBP4/BCLAF1/CDC5L/RBM39/SREK1/SRP54/IK/SRPK2/WTAP/DHX15/PNN/PRPF40A/TCERG1/YTHDC1/ATF4/PRPF4B/DDX39B/PPP4R3A/WAC/ASCC3/SMC5/TOPORS/PPP1CC/C12orf57/BAZ2A/LMNA/ATXN2L/NRIP1/SRSF1/PABPN1/SRSF10/SRRM2/PCBP1/TKT	55
GO:0005840	CC	GO:0005840	ribosome	40/539	220/14516	4.24273481607249e-17	7.19850673793632e-15	6.32688525203792e-15	SERP1/MRPS30/EIF2A/NUFIP2/EIF3H/RPL17/MRPL34/RPS8/MRPL17/RPS15A/RPL24/SF1/DDX3X/RPS13/RPL22L1/RPL39/RPL14/RPL32/RPL5/RPS24/RPL8/RPL9/BTF3/CANX/RPLP1/RPL12/RPLP0/RPS10/RPL11/RPL15/RPL30/RPL29/RPS7/RPS27A/RPS3A/RPS3/RPL22/RPL26/RPL19/RPL4	40
GO:0044391	CC	GO:0044391	ribosomal subunit	33/539	182/14516	2.7945270858194e-14	3.55603571670518e-12	3.12545792492959e-12	MRPS30/EIF2A/RPL17/MRPL34/RPS8/MRPL17/RPS15A/RPL24/DDX3X/RPS13/RPL39/RPL14/RPL32/RPL5/RPS24/RPL8/RPL9/RPLP1/RPL12/RPLP0/RPS10/RPL11/RPL15/RPL30/RPL29/RPS7/RPS27A/RPS3A/RPS3/RPL22/RPL26/RPL19/RPL4	33
GO:0022625	CC	GO:0022625	cytosolic large ribosomal subunit	19/539	55/14516	3.95437386247743e-14	4.02555259200202e-12	3.53812398221665e-12	RPL17/RPL24/RPL39/RPL14/RPL32/RPL5/RPL8/RPL9/RPLP1/RPL12/RPLP0/RPL11/RPL15/RPL30/RPL29/RPL22/RPL26/RPL19/RPL4	19
GO:0015934	CC	GO:0015934	large ribosomal subunit	22/539	113/14516	1.40566760459341e-10	1.19247468456341e-08	1.04808549465298e-08	MRPS30/RPL17/MRPL34/MRPL17/RPL24/RPL39/RPL14/RPL32/RPL5/RPL8/RPL9/RPLP1/RPL12/RPLP0/RPL11/RPL15/RPL30/RPL29/RPL22/RPL26/RPL19/RPL4	22
GO:0005681	CC	GO:0005681	spliceosomal complex	28/539	188/14516	3.28163526293506e-10	2.38621764119135e-08	2.09728569435699e-08	SMNDC1/PRPF38B/SYF2/SRRM1/RBM22/WBP11/BUD31/PRPF39/SF3B2/LUC7L2/ALYREF/CDC5L/SREK1/IK/DHX15/PNN/PRPF40A/SF1/PRPF4B/TRA2A/DDX39B/WAC/TRA2B/HNRNPC/KHDC4/SRSF1/PABPC1/SRRM2	28
GO:0042788	CC	GO:0042788	polysomal ribosome	10/539	31/14516	1.00565838909179e-07	6.39850150059654e-06	5.62374757057911e-06	NUFIP2/EIF3H/RPL24/RPL39/RPL32/RPL8/BTF3/RPL11/RPL30/RPL19	10
GO:0022627	CC	GO:0022627	cytosolic small ribosomal subunit	11/539	45/14516	5.38491459814164e-07	2.51035186843599e-05	2.20638929600929e-05	EIF2A/RPS8/RPS15A/DDX3X/RPS13/RPS24/RPS10/RPS7/RPS27A/RPS3A/RPS3	11
GO:0042470	CC	GO:0042470	melanosome	16/539	98/14516	5.91831481753081e-07	2.51035186843599e-05	2.20638929600929e-05	HSPA5/SLC3A2/RPN1/STX3/HSP90AB1/RAB1A/HSP90B1/CCT4/ERP29/CALU/PPIB/PDIA6/CANX/NAP1L1/TFRC/HSP90AA1	16
GO:0048770	CC	GO:0048770	pigment granule	16/539	98/14516	5.91831481753081e-07	2.51035186843599e-05	2.20638929600929e-05	HSPA5/SLC3A2/RPN1/STX3/HSP90AB1/RAB1A/HSP90B1/CCT4/ERP29/CALU/PPIB/PDIA6/CANX/NAP1L1/TFRC/HSP90AA1	16
GO:0030055	CC	GO:0030055	cell-substrate junction	36/539	398/14516	7.71838934558179e-07	3.02204628992395e-05	2.65612588815568e-05	HSPA5/HSPB1/ARF1/HSP90B1/RPS8/MTF2/CALR/CDC42/MPZL1/LAMTOR3/PPIB/HSPA9/RPS13/RAB21/PPP1CC/SCARB2/G3BP1/RHOA/RPL5/RPL8/PDLIM1/RPL9/PCBP2/RPLP1/PABPC1/RPL12/RPLP0/RPS10/RPL30/RPS7/RPS3A/RPS3/RPL22/RPL19/NPM1/RPL4	36
GO:0005844	CC	GO:0005844	polysome	13/539	67/14516	8.89955236936911e-07	3.23562296857777e-05	2.84384192254276e-05	NUFIP2/EIF3H/CALR/RWDD1/RPL24/RPL39/RPL32/RPL8/BTF3/RPL11/RPL30/RPS3/RPL19	13
GO:0016282	CC	GO:0016282	eukaryotic 43S preinitiation complex	7/539	17/14516	1.31641419046079e-06	4.46703215296362e-05	3.92614758558482e-05	EIF1/EIF3H/EIF1B/EIF3F/EIF3A/EIF3B/EIF3E	7
GO:0070993	CC	GO:0070993	translation preinitiation complex	7/539	18/14516	2.08535155155258e-06	6.63402462337665e-05	5.83075269348583e-05	EIF1/EIF3H/EIF1B/EIF3F/EIF3A/EIF3B/EIF3E	7
GO:0005819	CC	GO:0005819	spindle	31/539	345/14516	5.21955955340264e-06	0.000156279753687173	0.000137356830352701	TAF1D/HSPB1/SBDS/YPEL5/UNC119/DYNC1LI1/RAB11A/APP/RAD21/CDC42/IK/TBL1XR1/PPP2CA/CUL3/CCSAP/TOPORS/GOLGA2/PAFAH1B1/XIAP/SEPTIN7/SMC3/ZNF207/TPT1/CEP350/SLC25A5/TPR/FBXO5/RPS3/NPM1/TPX2/NEK2	31
GO:0010494	CC	GO:0010494	cytoplasmic stress granule	12/539	71/14516	1.0535418024328e-05	0.000297918209687941	0.000261845184815169	TIAL1/EIF4E/NUFIP2/G3BP2/DDX3X/PUM1/PRRC2C/G3BP1/ATXN2L/KPNB1/PABPC1/KHSRP	12
GO:0071013	CC	GO:0071013	catalytic step 2 spliceosome	13/539	86/14516	1.60178269605469e-05	0.000429109153837808	0.000377151050317585	SYF2/SRRM1/RBM22/BUD31/SF3B2/ALYREF/CDC5L/PNN/PRPF4B/HNRNPC/SRSF1/PABPC1/SRRM2	13
GO:0005852	CC	GO:0005852	eukaryotic translation initiation factor 3 complex	6/539	17/14516	2.2233530135057e-05	0.000565843341937201	0.000497328963547328	EIF3H/DDX3X/EIF3F/EIF3A/EIF3B/EIF3E	6
GO:0015935	CC	GO:0015935	small ribosomal subunit	11/539	72/14516	6.47191809168288e-05	0.00156866967079361	0.00137872941802768	EIF2A/RPS8/RPS15A/DDX3X/RPS13/RPS24/RPS10/RPS7/RPS27A/RPS3A/RPS3	11
GO:0000775	CC	GO:0000775	chromosome, centromeric region	19/539	190/14516	8.56398554947927e-05	0.00198139483849316	0.0017414803150855	SUGT1/MEAF6/DYNC1LI1/RAD21/PPP2CA/CDT1/CENPC/BUB3/PPP1CC/BAZ1B/PAFAH1B1/SEPTIN7/SMC3/ZNF207/SIN3A/AHCTF1/XPO1/TPR/NEK2	19
GO:0005790	CC	GO:0005790	smooth endoplasmic reticulum	7/539	30/14516	9.04929790390727e-05	0.00200264897090817	0.0017601609195243	HSPA5/DNAJC3/APP/CALR/ERP29/PPIB/CANX	7
GO:0005791	CC	GO:0005791	rough endoplasmic reticulum	11/539	75/14516	9.48696477951325e-05	0.0020120271136551	0.00176840352249699	RPN1/GLUL/SUCO/APP/RP9/SRPRA/CANX/SEC61G/ARL6IP1/PKM/RPL4	11
GO:0071782	CC	GO:0071782	endoplasmic reticulum tubular network	6/539	22/14516	0.000114383556946195	0.00232884921942453	0.00204686365061612	REEP3/REEP5/ATL1/KPNB1/RAB18/RTN4	6
GO:0000776	CC	GO:0000776	kinetochore	15/539	134/14516	0.000134881783659716	0.00264057030318444	0.00232084040710038	SUGT1/MEAF6/DYNC1LI1/CDT1/CENPC/BUB3/PPP1CC/PAFAH1B1/SEPTIN7/ZNF207/SIN3A/AHCTF1/XPO1/TPR/NEK2	15
GO:0033290	CC	GO:0033290	eukaryotic 48S preinitiation complex	5/539	15/14516	0.00015266826883848	0.00287807958662172	0.00252959119907813	EIF3H/EIF3F/EIF3A/EIF3B/EIF3E	5
GO:0000922	CC	GO:0000922	spindle pole	16/539	157/14516	0.000245305676133732	0.00445930675543105	0.00391935760739985	SBDS/YPEL5/UNC119/DYNC1LI1/RAB11A/RAD21/IK/PPP2CA/CUL3/TOPORS/GOLGA2/SMC3/TPT1/NPM1/TPX2/NEK2	16
GO:0098827	CC	GO:0098827	endoplasmic reticulum subcompartment	6/539	26/14516	0.000311014877969521	0.00536897534885959	0.00471888020528451	REEP3/REEP5/ATL1/KPNB1/RAB18/RTN4	6
GO:0036464	CC	GO:0036464	cytoplasmic ribonucleoprotein granule	19/539	210/14516	0.000316442554942609	0.00536897534885959	0.00471888020528451	UHMK1/TIAL1/EIF4E/NUFIP2/CDC42/G3BP2/DDX3X/DCP2/PUM1/PRRC2C/G3BP1/DDX3Y/ATXN2L/KPNB1/HELZ/PABPC1/KHSRP/RPLP0/PCBP1	19
GO:0018995	CC	GO:0018995	host cellular component	9/539	63/14516	0.000496975462723424	0.00790501595394446	0.00694784775188997	LMAN1/UBC/NUP93/BICD1/NUP58/KPNB1/XPO1/TPR/RPS27A	9
GO:0043657	CC	GO:0043657	host cell	9/539	63/14516	0.000496975462723424	0.00790501595394446	0.00694784775188997	LMAN1/UBC/NUP93/BICD1/NUP58/KPNB1/XPO1/TPR/RPS27A	9
GO:0035770	CC	GO:0035770	ribonucleoprotein granule	19/539	220/14516	0.000565596941592694	0.0087239043415358	0.00766758214280367	UHMK1/TIAL1/EIF4E/NUFIP2/CDC42/G3BP2/DDX3X/DCP2/PUM1/PRRC2C/G3BP1/DDX3Y/ATXN2L/KPNB1/HELZ/PABPC1/KHSRP/RPLP0/PCBP1	19
GO:0005684	CC	GO:0005684	U2-type spliceosomal complex	11/539	92/14516	0.00059028461242452	0.00883690787423767	0.00776690279505948	SYF2/RBM22/BUD31/PRPF39/SF3B2/LUC7L2/CDC5L/IK/DHX15/PRPF40A/SRRM2	11
GO:0000793	CC	GO:0000793	condensed chromosome	18/539	205/14516	0.000644709864067825	0.00937592345172923	0.00824065239785942	CCNB1IP1/MEAF6/DYNC1LI1/RAD21/CHEK1/CDT1/CENPC/RAD1/SMC5/BUB3/BRD4/PPP1CC/BAZ1B/SEPTIN7/SMC3/ZNF207/AHCTF1/NEK2	18
GO:0098687	CC	GO:0098687	chromosomal region	25/539	334/14516	0.000720101817831862	0.0101814395910116	0.00894863370112694	SUGT1/MEAF6/DYNC1LI1/RAD21/ALYREF/TERF2IP/CHEK1/PPP2CA/CDT1/CENPC/PURA/SMC5/BUB3/PPP1CC/BAZ1B/PAFAH1B1/SEPTIN7/SMC3/ZNF207/SIN3A/AHCTF1/XPO1/TPR/H3-3B/NEK2	25
GO:0005667	CC	GO:0005667	transcription regulator complex	26/539	360/14516	0.000962131546194021	0.0130869464161218	0.0115023311484888	JUN/TAF1D/YY1/ING2/NEUROD1/SMAD5/JUNB/MXI1/LMO4/RCOR3/TBL1XR1/MIER1/ATF4/ASCC3/TAF7/RLIM/CSNK2A1/ATF7IP/RBPJ/BDP1/PDLIM1/NAA16/SIN3A/HES6/SPEN/JUND	26
GO:0000974	CC	GO:0000974	Prp19 complex	4/539	13/14516	0.00102844372621783	0.0130869464161218	0.0115023311484888	SYF2/RBM22/CDC5L/POLR2A	4
GO:0016281	CC	GO:0016281	eukaryotic translation initiation factor 4F complex	4/539	13/14516	0.00102844372621783	0.0130869464161218	0.0115023311484888	EIF4A2/EIF4H/EIF4E/EIF4B	4
GO:0016580	CC	GO:0016580	Sin3 complex	4/539	13/14516	0.00102844372621783	0.0130869464161218	0.0115023311484888	ING2/MORF4L1/CSNK2A1/SIN3A	4
GO:0000118	CC	GO:0000118	histone deacetylase complex	9/539	73/14516	0.00146912226509761	0.0182386154374313	0.0160302172699996	ING2/MORF4L1/SAP18/RCOR3/TBL1XR1/CSNK2A1/NRIP1/SIN3A/KDM3A	9
GO:0071682	CC	GO:0071682	endocytic vesicle lumen	4/539	15/14516	0.00185061894457577	0.0224277391140254	0.0197121065524988	HSP90B1/CALR/HSPH1/HSP90AA1	4
GO:0072686	CC	GO:0072686	mitotic spindle	12/539	123/14516	0.00206733888460929	0.0234876586583545	0.0206436871674091	TAF1D/YPEL5/CDC42/IK/TBL1XR1/CUL3/CCSAP/GOLGA2/SMC3/TPR/RPS3/TPX2	12
GO:0008287	CC	GO:0008287	protein serine/threonine phosphatase complex	7/539	49/14516	0.00207651206213351	0.0234876586583545	0.0206436871674091	IER5/PPP1R15B/PPP4R2/PPP2R2A/PPP2CA/PPP1CC/CYCS	7
GO:1903293	CC	GO:1903293	phosphatase complex	7/539	49/14516	0.00207651206213351	0.0234876586583545	0.0206436871674091	IER5/PPP1R15B/PPP4R2/PPP2R2A/PPP2CA/PPP1CC/CYCS	7
GO:0070822	CC	GO:0070822	Sin3-type complex	4/539	16/14516	0.0023957211016074	0.026509174798221	0.0232993470980124	ING2/MORF4L1/CSNK2A1/SIN3A	4
GO:0034399	CC	GO:0034399	nuclear periphery	12/539	129/14516	0.0030790552626465	0.0333455133763206	0.0293079168337013	YY1/PPIG/SRRM1/RAD21/PRPF40A/ATF4/DDX39B/NUP93/LMNA/SMC3/AHCTF1/TPR	12
GO:0101002	CC	GO:0101002	ficolin-1-rich granule	11/539	114/14516	0.00340569157649905	0.0353774900497554	0.0310938543504209	ALDOC/YPEL5/HSP90AB1/KCMF1/ALDOA/IMPDH2/DDX3X/GPI/KPNB1/HSP90AA1/PKM	11
GO:1904813	CC	GO:1904813	ficolin-1-rich granule lumen	11/539	114/14516	0.00340569157649905	0.0353774900497554	0.0310938543504209	ALDOC/YPEL5/HSP90AB1/KCMF1/ALDOA/IMPDH2/DDX3X/GPI/KPNB1/HSP90AA1/PKM	11
GO:0016234	CC	GO:0016234	inclusion body	8/539	68/14516	0.00357750572211958	0.0364190082511773	0.0320092617242278	HERPUD1/HSP90AB1/UBQLN1/ATF4/GPX1/FBXO7/PABPN1/TPR	8
GO:0030867	CC	GO:0030867	rough endoplasmic reticulum membrane	5/539	29/14516	0.00392928142770285	0.039215769543152	0.0344673809447619	SUCO/RP9/SRPRA/SEC61G/ARL6IP1	5
GO:0000779	CC	GO:0000779	condensed chromosome, centromeric region	11/539	118/14516	0.00443748516628737	0.0434361528776976	0.0381767448516626	MEAF6/DYNC1LI1/RAD21/CDT1/CENPC/BUB3/PPP1CC/SEPTIN7/ZNF207/AHCTF1/NEK2	11
GO:0071007	CC	GO:0071007	U2-type catalytic step 2 spliceosome	5/539	30/14516	0.00457372124270864	0.0437807425651993	0.0384796103613064	SYF2/RBM22/BUD31/CDC5L/SRRM2	5
GO:0000159	CC	GO:0000159	protein phosphatase type 2A complex	4/539	19/14516	0.004670828650023	0.0437807425651993	0.0384796103613064	IER5/PPP2R2A/PPP2CA/CYCS	4
GO:0005793	CC	GO:0005793	endoplasmic reticulum-Golgi intermediate compartment	11/539	119/14516	0.00473072856794884	0.0437807425651993	0.0384796103613064	VMA21/HSPA5/IST1/LMAN1/COPB1/TMED9/CALR/PTPN2/GOLGA2/PDIA6/GOLGB1	11
GO:0000777	CC	GO:0000777	condensed chromosome kinetochore	10/539	103/14516	0.0049060072947537	0.0445921020183863	0.0391927274486902	MEAF6/DYNC1LI1/CDT1/CENPC/BUB3/PPP1CC/SEPTIN7/ZNF207/AHCTF1/NEK2	10
GO:0017053	CC	GO:0017053	transcription repressor complex	8/539	72/14516	0.0050932973367815	0.0454822516565225	0.0399750945176756	JUN/TBL1XR1/MIER1/RLIM/CSNK2A1/RBPJ/SIN3A/SPEN	8
GO:0035145	CC	GO:0035145	exon-exon junction complex	4/539	20/14516	0.00566962085998258	0.0489124918259514	0.0429899886796182	SAP18/ALYREF/PNN/SRSF1	4
GO:0003735	MF	GO:0003735	structural constituent of ribosome	32/535	155/14257	1.95372049679122e-15	1.28750180738541e-12	1.18045848964017e-12	MRPS30/RPL17/MRPL34/RPS8/MRPL17/RPS15A/RPL24/RPS13/RPL22L1/RPL39/RPL14/RPL32/RPL5/RPS24/RPL8/RPL9/RPLP1/RPL12/RPLP0/RPS10/RPL11/RPL15/RPL30/RPL29/RPS7/RPS27A/RPS3A/RPS3/RPL22/RPL26/RPL19/RPL4	32
GO:0003729	MF	GO:0003729	mRNA binding	35/535	278/14257	3.13406157874378e-10	1.03267329019608e-07	9.46816497999437e-08	RSL1D1/SRSF4/TIAL1/EIF2A/CNBP/LUC7L2/RBM25/PTBP3/CALR/PTBP1/YTHDC1/SF1/G3BP2/DDX3X/RPS13/TRA2B/PUM1/G3BP1/EIF3A/CELF1/HNRNPC/RPL5/SRSF1/PCBP2/PABPC1/KHSRP/SRRM2/PCBP1/RPL30/RPS7/TPR/RPS3A/RPS3/RPL26/PKM	35
GO:0051082	MF	GO:0051082	unfolded protein binding	17/535	103/14257	2.59406279274041e-07	4.73473445779422e-05	4.34108709971069e-05	HSPA5/DNAJB1/HSP90AB1/HSP90B1/DNAJA2/LMAN1/CALR/TOMM20/CCT4/PPIB/HSPA9/NACA/CANX/ST13/SRSF10/HSP90AA1/NPM1	17
GO:0003743	MF	GO:0003743	translation initiation factor activity	12/535	51/14257	2.87389041444262e-07	4.73473445779422e-05	4.34108709971069e-05	EIF4A2/EIF4H/EIF2A/EIF1/EIF4E/EIF3H/EIF1B/EIF3F/EIF3A/EIF4B/EIF3B/EIF3E	12
GO:0031625	MF	GO:0031625	ubiquitin protein ligase binding	29/535	287/14257	1.25699360427728e-06	0.000155091926655068	0.000142197533583594	JUN/HSPA5/HSP90AB1/NFKBIA/SMAD5/CAMLG/CALR/CDKN1A/UBC/HSPA9/CUL3/PER3/TMBIM6/POLR2A/UBE2B/UBXN7/GPI/CXCR4/FBXO7/RPL5/CACYBP/PCBP2/RPL11/SLC25A5/SUMO2/HSP90AA1/RPS27A/TPI1/RTN4	29
GO:0043024	MF	GO:0043024	ribosomal small subunit binding	7/535	17/14257	1.41206610004614e-06	0.000155091926655068	0.000142197533583594	EIF4H/EIF1/DDX3X/PIM1/EIF1B/EIF4B/NPM1	7
GO:0003714	MF	GO:0003714	transcription corepressor activity	21/535	172/14257	1.91958101739571e-06	0.000163867226519306	0.000150243252171682	COPS2/KDM5B/DNAJB1/CIR1/SAP18/RCOR3/TOB1/TBL1XR1/MIER1/TCERG1/SF1/IRF2BP2/RLIM/ATF7IP/ZNF451/ZHX1/NRIP1/RYBP/ZNF281/SIN3A/SPEN	21
GO:0042393	MF	GO:0042393	histone binding	24/535	216/14257	1.98928347823134e-06	0.000163867226519306	0.000150243252171682	KMT2E/KDM5B/ING1/ING2/UIMC1/SCML1/PHF1/BRD2/MTF2/TBL1XR1/TAF7/BRD4/DNAJC2/CHD1/PHIP/BAZ1B/BAZ2A/USP15/RSF1/SBNO1/MSH6/NAP1L1/ANP32B/NPM1	24
GO:0003712	MF	GO:0003712	transcription coregulator activity	38/535	455/14257	3.40408218956199e-06	0.000249254462546817	0.000228531365708606	MED10/COPS2/KDM5B/DNAJB1/CIR1/BUD31/JMJD6/SAP18/BCLAF1/NSD3/RCOR3/TOB1/TBL1XR1/MIER1/TCERG1/SF1/BTG1/TMF1/IRF2BP2/BRD4/RLIM/ATF7IP/ZNF451/RSF1/ZHX1/NRIP1/PDLIM1/RYBP/JMY/ZNF281/SIN3A/MED13/EWSR1/HES6/MED13L/KDM3A/SPEN/NPM1	38
GO:0044389	MF	GO:0044389	ubiquitin-like protein ligase binding	29/535	304/14257	3.9974145509839e-06	0.000263429618909839	0.000241527994975238	JUN/HSPA5/HSP90AB1/NFKBIA/SMAD5/CAMLG/CALR/CDKN1A/UBC/HSPA9/CUL3/PER3/TMBIM6/POLR2A/UBE2B/UBXN7/GPI/CXCR4/FBXO7/RPL5/CACYBP/PCBP2/RPL11/SLC25A5/SUMO2/HSP90AA1/RPS27A/TPI1/RTN4	29
GO:0045296	MF	GO:0045296	cadherin binding	29/535	311/14257	6.24839643034494e-06	0.000360562083786695	0.00033058483522652	HSPA5/SLC3A2/RSL1D1/EIF4H/DNAJB1/VAPA/HSP90AB1/RAB1A/ALDOA/EIF2A/ZC3H15/IST1/RPL24/DDX3X/CRKL/KTN1/GOLGA2/SEPTIN7/RPL14/ATXN2L/PDLIM1/KIF5B/EIF3E/RPL15/PCBP1/ARGLU1/RPL29/PKM/RTN4	29
GO:0090079	MF	GO:0090079	translation regulator activity, nucleic acid binding	15/535	103/14257	6.56562216303542e-06	0.000360562083786695	0.00033058483522652	EIF4A2/EIF4H/EIF2A/EIF1/EIF4E/EIF3H/PURA/EIF1B/EIF3F/EIF3A/CELF1/EIF4B/EIF3B/EIF3E/PABPC1	15
GO:0043021	MF	GO:0043021	ribonucleoprotein complex binding	16/535	130/14257	2.87621751393292e-05	0.00145802103206292	0.00133680069068623	HSPA5/UHMK1/SBDS/EIF4H/EIF2A/EIF1/SRP54/DDX3X/PIM1/EIF1B/SRPRA/RICTOR/EIF4B/NAA16/RPLP1/NPM1	16
GO:0140030	MF	GO:0140030	modification-dependent protein binding	17/535	146/14257	3.37209550379588e-05	0.00146527486070229	0.00134345143366043	KMT2E/ING1/ING2/UIMC1/PHF1/BRD2/MTF2/UBQLN1/TAF7/BRD4/DNAJC2/CHD1/PHIP/BAZ2A/USP15/RAD23A/MSH6	17
GO:0045182	MF	GO:0045182	translation regulator activity	16/535	132/14257	3.47945929708605e-05	0.00146527486070229	0.00134345143366043	EIF4A2/EIF4H/EIF2A/EIF1/EIF4E/EIF3H/CNBP/PURA/EIF1B/EIF3F/EIF3A/CELF1/EIF4B/EIF3B/EIF3E/PABPC1	16
GO:0048027	MF	GO:0048027	mRNA 5'-UTR binding	7/535	26/14257	3.55757174070358e-05	0.00146527486070229	0.00134345143366043	RSL1D1/DDX3X/RPS13/RPL5/RPS7/RPS3A/RPL26	7
GO:0008135	MF	GO:0008135	translation factor activity, RNA binding	12/535	83/14257	5.87893832243498e-05	0.00227895314969685	0.00208948024586853	EIF4A2/EIF4H/EIF2A/EIF1/EIF4E/EIF3H/EIF1B/EIF3F/EIF3A/EIF4B/EIF3B/EIF3E	12
GO:0031072	MF	GO:0031072	heat shock protein binding	14/535	116/14257	0.000111322586108465	0.00407564356919324	0.00373679324130169	DNAJB9/HSPA5/DNAJB1/HSP90AB1/DNAJA2/HSPA9/CHORDC1/DNAJC2/CSNK2A1/MVD/KPNB1/ST13/TPR/RPS3	14
GO:0061629	MF	GO:0061629	RNA polymerase II-specific DNA-binding transcription factor binding	22/535	246/14257	0.000150212176606963	0.00520999075705205	0.00477683043614388	JUN/HSPB1/NFKBIA/NEUROD1/BUD31/CALR/MIER1/TCERG1/ATF2/TMF1/TAF7/COMMD6/BAZ2A/RBPJ/CRY1/NRIP1/SIN3A/MED13/HES6/KDM3A/JUND/NPM1	22
GO:0044183	MF	GO:0044183	protein folding chaperone	6/535	25/14257	0.000261326358659113	0.00861070351781778	0.00789480683528058	HSPA5/HSPB1/DNAJB1/HSP90AB1/CALR/HSPA9	6
GO:0019843	MF	GO:0019843	rRNA binding	9/535	62/14257	0.00047492721925604	0.0149036684518919	0.0136645726242089	SBDS/RPS13/RPL5/RPL8/RPL9/RPL12/RPLP0/RPL11/RPS3	9
GO:0003727	MF	GO:0003727	single-stranded RNA binding	10/535	76/14257	0.000524045788536413	0.0156975533929771	0.0143924537138709	EIF4H/JMJD6/CNBP/PTBP1/DDX3X/HNRNPC/EIF4B/PABPC1/RPS7/HNRNPDL	10
GO:0140297	MF	GO:0140297	DNA-binding transcription factor binding	24/535	315/14257	0.000823349595644563	0.023590755805642	0.0216294127185345	JUN/HSPB1/NFKBIA/NEUROD1/EIF4E/BUD31/CALR/MIER1/TCERG1/ATF4/ATF2/TMF1/TAF7/COMMD6/BAZ2A/RBPJ/CRY1/NRIP1/SIN3A/MED13/HES6/KDM3A/JUND/NPM1	24

## Sheet: GO_Down
	ONTOLOGY	ID	Description	GeneRatio	BgRatio	pvalue	p.adjust	qvalue	geneID	Count
GO:0042775	BP	GO:0042775	mitochondrial ATP synthesis coupled electron transport	13/368	82/13890	2.19224e-07	4.96908e-05	4.69986e-05	NDUFV3/NDUFV1/NDUFA3/NDUFB10/NDUFB6/NDUFB2/NDUFB8/NDUFV2/NDUFA13/NDUFA2/NDUFB3/NDUFC2/NDUFB4	13
GO:0042773	BP	GO:0042773	ATP synthesis coupled electron transport	13/368	83/13890	2.53793e-07	5.34194e-05	5.05252e-05	NDUFV3/NDUFV1/NDUFA3/NDUFB10/NDUFB6/NDUFB2/NDUFB8/NDUFV2/NDUFA13/NDUFA2/NDUFB3/NDUFC2/NDUFB4	13
GO:0006119	BP	GO:0006119	oxidative phosphorylation	16/368	128/13890	2.67097e-07	5.34194e-05	5.05252e-05	ATP5PB/NDUFV3/NDUFV1/NDUFA3/NDUFB10/NDUFB6/ATP5PD/NDUFB2/NDUFB8/NDUFV2/NDUFA13/ATP5F1C/NDUFA2/NDUFB3/NDUFC2/NDUFB4	16
GO:0040029	BP	GO:0040029	regulation of gene expression, epigenetic	15/368	187/13890	0.000137895	0.0110022	0.0104061	H3C2/H4C3/H1-5/H3-3A/H2AC20/H2AC11/H1-2/HMGB1/H4C5/H1-4/H2AC17/DNMT3A/POLR2L/MACROH2A1/H2AC15	15
GO:0010257	BP	GO:0010257	NADH dehydrogenase complex assembly	15/368	59/13890	2.31654e-11	3.93812e-08	3.72476e-08	DMAC1/NDUFV3/NDUFV1/NDUFA3/NDUFB10/NDUFB6/NDUFB2/NDUFB8/NDUFV2/NDUFA13/NDUFA2/NDUFAF8/NDUFB3/NDUFC2/NDUFB4	15
GO:0032981	BP	GO:0032981	mitochondrial respiratory chain complex I assembly	15/368	59/13890	2.31654e-11	3.93812e-08	3.72476e-08	DMAC1/NDUFV3/NDUFV1/NDUFA3/NDUFB10/NDUFB6/NDUFB2/NDUFB8/NDUFV2/NDUFA13/NDUFA2/NDUFAF8/NDUFB3/NDUFC2/NDUFB4	15
GO:0065004	BP	GO:0065004	protein-DNA complex assembly	26/368	209/13890	5.20539e-11	5.89944e-08	5.57981e-08	H3C2/H4C3/H1-5/H3-3A/H1-2/HMGB1/H4C5/H1-4/GTF2A2/ITGB3BP/TAF11/H2BC4/RAD51C/PIH1D1/PSMC5/RPA3/CENPW/PSMC3/NAP1L4/CENPK/MACROH2A1/H2BC5/CENPM/SOX12/RUVBL1/SMARCA4	26
GO:0006120	BP	GO:0006120	mitochondrial electron transport, NADH to ubiquinone	13/368	47/13890	1.59888e-10	1.35905e-07	1.28541e-07	NDUFV3/NDUFV1/NDUFA3/NDUFB10/NDUFB6/NDUFB2/NDUFB8/NDUFV2/NDUFA13/NDUFA2/NDUFB3/NDUFC2/NDUFB4	13
GO:0071824	BP	GO:0071824	protein-DNA complex subunit organization	27/368	244/13890	3.26942e-10	2.2232e-07	2.10275e-07	H3C2/H4C3/H1-5/H3-3A/H1-2/HMGB1/H4C5/H1-4/GTF2A2/ITGB3BP/TAF11/H2BC4/RAD51C/PIH1D1/PSMC5/SUPT16H/RPA3/CENPW/PSMC3/NAP1L4/CENPK/MACROH2A1/H2BC5/CENPM/SOX12/RUVBL1/SMARCA4	27
GO:0033108	BP	GO:0033108	mitochondrial respiratory chain complex assembly	17/368	96/13890	5.00124e-10	2.83404e-07	2.68049e-07	DMAC1/NDUFV3/NDUFV1/NDUFA3/NDUFB10/NDUFB6/COX17/NDUFB2/COA4/NDUFB8/NDUFV2/NDUFA13/NDUFA2/NDUFAF8/NDUFB3/NDUFC2/NDUFB4	17
GO:0006323	BP	GO:0006323	DNA packaging	23/368	201/13890	3.62387e-09	1.6478e-06	1.55852e-06	H3C2/H4C3/H1-5/H3-3A/H1-2/H4C5/H1-4/ITGB3BP/CDKN2A/NAA10/H2BC4/NCAPD3/FAM172A/CENPW/DNMT3A/NAP1L4/CENPK/MACROH2A1/H2BC5/CENPM/TTN/RUVBL1/MBD3	23
GO:0006333	BP	GO:0006333	chromatin assembly or disassembly	22/368	185/13890	3.87717e-09	1.6478e-06	1.55852e-06	H3C2/H4C3/H1-5/H3-3A/H1-2/H4C5/H1-4/ITGB3BP/CDKN2A/H2BC4/SUPT16H/FAM172A/CENPW/DNMT3A/NAP1L4/CENPK/MACROH2A1/H2BC5/CENPM/RUVBL1/SMARCA4/MBD3	22
GO:0031497	BP	GO:0031497	chromatin assembly	20/368	164/13890	1.29933e-08	4.90859e-06	4.64264e-06	H3C2/H4C3/H1-5/H3-3A/H1-2/H4C5/H1-4/ITGB3BP/CDKN2A/H2BC4/FAM172A/CENPW/DNMT3A/NAP1L4/CENPK/MACROH2A1/H2BC5/CENPM/RUVBL1/MBD3	20
GO:0071103	BP	GO:0071103	DNA conformation change	28/368	312/13890	1.74199e-08	5.92275e-06	5.60186e-06	H3C2/H4C3/H1-5/H3-3A/H1-2/HMGB1/H4C5/H1-4/ITGB3BP/CDKN2A/HNRNPA2B1/NAA10/H2BC4/NCAPD3/FAM172A/CENPW/SSBP1/DNMT3A/DDX1/NAP1L4/CENPK/MACROH2A1/H2BC5/CENPM/TTN/HMGB3/RUVBL1/MBD3	28
GO:0097549	BP	GO:0097549	chromatin organization involved in negative regulation of transcription	17/368	126/13890	3.59242e-08	1.11039e-05	1.05023e-05	H3C2/H4C3/H1-5/H3-3A/H2AC20/H2AC11/H1-2/HMGB1/H4C5/H1-4/CDKN2A/FAM172A/H2AC17/DNMT3A/MACROH2A1/H2AC15/MBD3	17
GO:0006334	BP	GO:0006334	nucleosome assembly	16/368	116/13890	6.63905e-08	1.88106e-05	1.77915e-05	H3C2/H4C3/H1-5/H3-3A/H1-2/H4C5/H1-4/ITGB3BP/H2BC4/CENPW/NAP1L4/CENPK/MACROH2A1/H2BC5/CENPM/RUVBL1	16
GO:0034728	BP	GO:0034728	nucleosome organization	18/368	150/13890	8.98928e-08	2.35104e-05	2.22366e-05	H3C2/H4C3/H1-5/H3-3A/H1-2/H4C5/H1-4/ITGB3BP/H2BC4/SUPT16H/CENPW/NAP1L4/CENPK/MACROH2A1/H2BC5/CENPM/RUVBL1/SMARCA4	18
GO:0034401	BP	GO:0034401	chromatin organization involved in regulation of transcription	17/368	138/13890	1.39896e-07	3.39749e-05	3.21341e-05	H3C2/H4C3/H1-5/H3-3A/H2AC20/H2AC11/H1-2/HMGB1/H4C5/H1-4/CDKN2A/FAM172A/H2AC17/DNMT3A/MACROH2A1/H2AC15/MBD3	17
GO:0006338	BP	GO:0006338	chromatin remodeling	20/368	199/13890	3.32412e-07	6.2789e-05	5.93871e-05	H3C2/H4C3/H3-3A/HMGB1/H4C5/ITGB3BP/CDKN2A/NUDT5/PIH1D1/FAM172A/CENPW/DNMT3A/PBRM1/CENPK/CENPM/CBX3/HMGB3/RUVBL1/SMARCA4/MBD3	20
GO:0022904	BP	GO:0022904	respiratory electron transport chain	14/368	101/13890	4.16618e-07	7.45528e-05	7.05135e-05	NDUFV3/NDUFV1/NDUFA3/NDUFB10/NDUFB6/ETFB/NDUFB2/NDUFB8/NDUFV2/NDUFA13/NDUFA2/NDUFB3/NDUFC2/NDUFB4	14
GO:0016458	BP	GO:0016458	gene silencing	22/368	244/13890	5.67337e-07	9.64473e-05	9.12218e-05	H3C2/H4C3/H1-5/H3-3A/H2AC20/H2AC11/H1-2/HMGB1/H4C5/H1-4/NCBP2/POLR2J/HNRNPA2B1/MAP2K2/FAM172A/H2AC17/POLR2L/XPO5/MACROH2A1/DDX17/NCOR2/H2AC15	22
GO:0045814	BP	GO:0045814	negative regulation of gene expression, epigenetic	14/368	111/13890	1.34348e-06	0.000217516	0.000205732	H3C2/H4C3/H1-5/H3-3A/H2AC20/H2AC11/H1-2/HMGB1/H4C5/H1-4/H2AC17/DNMT3A/MACROH2A1/H2AC15	14
GO:0022900	BP	GO:0022900	electron transport chain	16/368	161/13890	5.83068e-06	0.000901105	0.000852284	NDUFV3/NDUFV1/AKR7A2/NDUFA3/NDUFB10/NDUFB6/ETFB/NDUFB2/NDUFB8/NDUFV2/NDUFA13/NDUFA2/NDUFB3/NDUFC2/AKR1B1/NDUFB4	16
GO:0034724	BP	GO:0034724	DNA replication-independent nucleosome organization	9/368	51/13890	6.63608e-06	0.000980986	0.000927836	H4C3/H3-3A/H4C5/ITGB3BP/SUPT16H/CENPW/CENPK/CENPM/RUVBL1	9
GO:0008380	BP	GO:0008380	RNA splicing	28/368	430/13890	1.13037e-05	0.00160136	0.0015146	NCBP2/POLR2J/MAGOH/HNRNPA2B1/TAF15/TXNL4A/NOVA1/SNRPG/THOC7/SRRM4/FAM172A/PTBP2/POLR2L/DDX1/SNRPE/UBL5/CPSF3/ARL6IP4/GEMIN6/LSM4/DDX17/SNRNP25/SUGP2/C1QBP/LSM6/ZBTB8OS/PCBP4/HNRNPD	28
GO:0031055	BP	GO:0031055	chromatin remodeling at centromere	8/368	44/13890	1.7309e-05	0.00235402	0.00222648	H4C3/H3-3A/H4C5/ITGB3BP/CENPW/CENPK/CENPM/RUVBL1	8
GO:0070897	BP	GO:0070897	transcription preinitiation complex assembly	7/368	33/13890	2.03961e-05	0.00266718	0.00252267	HMGB1/GTF2A2/TAF11/PIH1D1/PSMC5/PSMC3/SMARCA4	7
GO:0000377	BP	GO:0000377	RNA splicing, via transesterification reactions with bulged adenosine as nucleophile	23/368	340/13890	3.85543e-05	0.00468159	0.00442795	NCBP2/POLR2J/MAGOH/HNRNPA2B1/TXNL4A/NOVA1/SNRPG/SRRM4/FAM172A/PTBP2/POLR2L/DDX1/SNRPE/UBL5/CPSF3/GEMIN6/LSM4/DDX17/SNRNP25/C1QBP/LSM6/PCBP4/HNRNPD	23
GO:0000398	BP	GO:0000398	mRNA splicing, via spliceosome	23/368	340/13890	3.85543e-05	0.00468159	0.00442795	NCBP2/POLR2J/MAGOH/HNRNPA2B1/TXNL4A/NOVA1/SNRPG/SRRM4/FAM172A/PTBP2/POLR2L/DDX1/SNRPE/UBL5/CPSF3/GEMIN6/LSM4/DDX17/SNRNP25/C1QBP/LSM6/PCBP4/HNRNPD	23
GO:0045333	BP	GO:0045333	cellular respiration	15/368	168/13890	4.07176e-05	0.00477379	0.00451515	NDUFV3/NDUFV1/NDUFA3/NDUFB10/NDUFB6/ETFB/NDUFB2/NDUFB8/NDUFV2/NDUFA13/BLOC1S1/NDUFA2/NDUFB3/NDUFC2/NDUFB4	15
GO:0031145	BP	GO:0031145	anaphase-promoting complex-dependent catabolic process	10/368	79/13890	4.27131e-05	0.00484081	0.00457854	PSMB4/PSMD4/PSMC5/PSMA4/PSMB7/PSMB1/ANAPC15/PSMC3/PTTG1/ANAPC7	10
GO:0000375	BP	GO:0000375	RNA splicing, via transesterification reactions	23/368	343/13890	4.41835e-05	0.00484594	0.00458339	NCBP2/POLR2J/MAGOH/HNRNPA2B1/TXNL4A/NOVA1/SNRPG/SRRM4/FAM172A/PTBP2/POLR2L/DDX1/SNRPE/UBL5/CPSF3/GEMIN6/LSM4/DDX17/SNRNP25/C1QBP/LSM6/PCBP4/HNRNPD	23
GO:0006336	BP	GO:0006336	DNA replication-independent nucleosome assembly	8/368	50/13890	4.56495e-05	0.00485026	0.00458747	H4C3/H3-3A/H4C5/ITGB3BP/CENPW/CENPK/CENPM/RUVBL1	8
GO:0006342	BP	GO:0006342	chromatin silencing	9/368	67/13890	6.42253e-05	0.00661715	0.00625864	H1-5/H2AC20/H2AC11/H1-2/HMGB1/H1-4/H2AC17/MACROH2A1/H2AC15	9
GO:0034508	BP	GO:0034508	centromere complex assembly	8/368	53/13890	7.03245e-05	0.00697305	0.00659526	H4C3/H3-3A/H4C5/ITGB3BP/CENPW/CENPK/CENPM/RUVBL1	8
GO:0043044	BP	GO:0043044	ATP-dependent chromatin remodeling	10/368	84/13890	7.28018e-05	0.00697305	0.00659526	H4C3/H4C5/ITGB3BP/CENPW/PBRM1/CENPK/CENPM/RUVBL1/SMARCA4/MBD3	10
GO:0034080	BP	GO:0034080	CENP-A containing nucleosome assembly	7/368	40/13890	7.58832e-05	0.00697305	0.00659526	H4C3/H4C5/ITGB3BP/CENPW/CENPK/CENPM/RUVBL1	7
GO:0061641	BP	GO:0061641	CENP-A containing chromatin organization	7/368	40/13890	7.58832e-05	0.00697305	0.00659526	H4C3/H4C5/ITGB3BP/CENPW/CENPK/CENPM/RUVBL1	7
GO:0070125	BP	GO:0070125	mitochondrial translational elongation	10/368	88/13890	0.000108368	0.00969608	0.00917075	MRPL55/MRPL36/AURKAIP1/MRPL57/MRPS18C/MRPS25/MRPL20/MRPS21/MRPS18A/MRPL23	10
GO:0070126	BP	GO:0070126	mitochondrial translational termination	10/368	89/13890	0.00011926	0.0101633	0.00961263	MRPL55/MRPL36/AURKAIP1/MRPL57/MRPS18C/MRPS25/MRPL20/MRPS21/MRPS18A/MRPL23	10
GO:0006521	BP	GO:0006521	regulation of cellular amino acid metabolic process	8/368	57/13890	0.000119568	0.0101633	0.00961263	PSMB4/PSMD4/PSMC5/PSMA4/PSMB7/PSMB1/ODC1/PSMC3	8
GO:0006397	BP	GO:0006397	mRNA processing	28/368	494/13890	0.000131371	0.0108942	0.010304	NCBP2/POLR2J/AURKAIP1/MAGOH/HNRNPA2B1/TXNL4A/NOVA1/SNRPG/THOC7/SRRM4/NELFE/FAM172A/PTBP2/POLR2L/DDX1/SNRPE/UBL5/CPSF3/ARL6IP4/GEMIN6/LSM4/DDX17/SNRNP25/SUGP2/C1QBP/LSM6/PCBP4/HNRNPD	28
GO:0060968	BP	GO:0060968	regulation of gene silencing	12/368	127/13890	0.000139145	0.0110022	0.0104061	H3C2/H4C3/H1-5/H3-3A/H1-2/H4C5/H1-4/POLR2J/MAP2K2/POLR2L/XPO5/NCOR2	12
GO:0006414	BP	GO:0006414	translational elongation	12/368	132/13890	0.000200651	0.0155049	0.0146648	MRPL55/MRPL36/AURKAIP1/MRPL57/MRPS18C/MRPS25/MRPL20/MRPS21/GTPBP2/SRP9/MRPS18A/MRPL23	12
GO:0051123	BP	GO:0051123	RNA polymerase II preinitiation complex assembly	5/368	22/13890	0.0002306	0.0174231	0.0164791	HMGB1/GTF2A2/TAF11/PSMC5/PSMC3	5
GO:0043624	BP	GO:0043624	cellular protein complex disassembly	16/368	219/13890	0.000245541	0.0181487	0.0171654	STMN1/MRPL55/MRPL36/AURKAIP1/NSF/MRPL57/SPTBN1/MRPS18C/STMN3/MRPS25/NCKAP5/MRPL20/MRPS21/ADD2/MRPS18A/MRPL23	16
GO:0031507	BP	GO:0031507	heterochromatin assembly	8/368	65/13890	0.000303858	0.0219812	0.0207903	H3C2/H4C3/H3-3A/H4C5/CDKN2A/FAM172A/DNMT3A/MBD3	8
GO:0006352	BP	GO:0006352	DNA-templated transcription, initiation	16/368	224/13890	0.00031666	0.0224301	0.0212148	H4C3/HMGB1/H4C5/POLR2J/GTF2A2/MED4/TAF11/TAF15/PIH1D1/PSMC5/E2F3/POLR2L/PSMC3/MAML2/SMARCA4/ESRRG	16
GO:0007007	BP	GO:0007007	inner mitochondrial membrane organization	7/368	50/13890	0.000323918	0.022476	0.0212582	ATP5PB/MICOS13/ATP5PD/TIMM10/NDUFA13/MICOS10/ATP5F1C	7
GO:0046034	BP	GO:0046034	ATP metabolic process	18/368	273/13890	0.000363456	0.0240057	0.0227051	TMSB4X/ATP5PB/NDUFV3/NDUFV1/NDUFA3/NUDT5/NDUFB10/NDUFB6/ATP5PD/NDUFB2/NDUFB8/NDUFV2/NDUFA13/ATP5F1C/NDUFA2/NDUFB3/NDUFC2/NDUFB4	18
GO:1903311	BP	GO:1903311	regulation of mRNA metabolic process	20/368	321/13890	0.000364763	0.0240057	0.0227051	NCBP2/PSMB4/MAGOH/HNRNPA2B1/TAF15/NOVA1/PSMD4/E2F1/PSMC5/SRRM4/PSMA4/PSMB7/PSMB1/NELFE/FAM172A/PSMC3/DDX17/C1QBP/PCBP4/HNRNPD	20
GO:0045930	BP	GO:0045930	negative regulation of mitotic cell cycle	19/368	297/13890	0.000367147	0.0240057	0.0227051	PSMB4/CDKN2A/HRAS/AURKAIP1/NAA10/PSMD4/E2F1/PSMC5/PSMA4/PSMB7/PSMB1/ANAPC15/PSMC3/NAE1/PCNA/PRMT1/PTTG1/PCBP4/BCL2L1	19
GO:0006415	BP	GO:0006415	translational termination	10/368	105/13890	0.000465478	0.0294047	0.0278116	MRPL55/MRPL36/AURKAIP1/MRPL57/MRPS18C/MRPS25/MRPL20/MRPS21/MRPS18A/MRPL23	10
GO:0043486	BP	GO:0043486	histone exchange	7/368	53/13890	0.000467016	0.0294047	0.0278116	H4C3/H4C5/ITGB3BP/CENPW/CENPK/CENPM/RUVBL1	7
GO:0022618	BP	GO:0022618	ribonucleoprotein complex assembly	14/368	188/13890	0.00048925	0.0302445	0.0286059	EIF3J/TXNL4A/SNRPG/DENR/PIH1D1/DHX30/PTBP2/DDX1/SNRPE/GEMIN6/MRPL20/LSM4/EIF3K/RUVBL1	14
GO:0031047	BP	GO:0031047	gene silencing by RNA	13/368	167/13890	0.000507307	0.0308008	0.029132	H3C2/H4C3/H3-3A/H4C5/NCBP2/POLR2J/HNRNPA2B1/MAP2K2/FAM172A/POLR2L/XPO5/DDX17/NCOR2	13
GO:0002223	BP	GO:0002223	stimulatory C-type lectin receptor signaling pathway	9/368	89/13890	0.000572994	0.0341509	0.0323007	PSMB4/HRAS/PSMD4/PSMC5/PSMA4/PSMB7/PSMB1/PSMC3/PLCG2	9
GO:1901657	BP	GO:1901657	glycosyl compound metabolic process	10/368	108/13890	0.000582575	0.0341509	0.0323007	AKR7A2/DERA/NME1/AHCY/DTYMK/APRT/OARD1/NME4/AKR1B1/DNPH1	10
GO:0030261	BP	GO:0030261	chromosome condensation	6/368	40/13890	0.000594831	0.0342036	0.0323504	H1-5/H3-3A/H1-2/H1-4/NCAPD3/TTN	6
GO:0033238	BP	GO:0033238	regulation of cellular amine metabolic process	8/368	72/13890	0.000613652	0.0342036	0.0323504	PSMB4/PSMD4/PSMC5/PSMA4/PSMB7/PSMB1/ODC1/PSMC3	8
GO:0070828	BP	GO:0070828	heterochromatin organization	8/368	72/13890	0.000613652	0.0342036	0.0323504	H3C2/H4C3/H3-3A/H4C5/CDKN2A/FAM172A/DNMT3A/MBD3	8
GO:0071826	BP	GO:0071826	ribonucleoprotein complex subunit organization	14/368	195/13890	0.000703848	0.0385981	0.0365069	EIF3J/TXNL4A/SNRPG/DENR/PIH1D1/DHX30/PTBP2/DDX1/SNRPE/GEMIN6/MRPL20/LSM4/EIF3K/RUVBL1	14
GO:0002220	BP	GO:0002220	innate immune response activating cell surface receptor signaling pathway	9/368	92/13890	0.000730644	0.0392122	0.0370877	PSMB4/HRAS/PSMD4/PSMC5/PSMA4/PSMB7/PSMB1/PSMC3/PLCG2	9
GO:0009142	BP	GO:0009142	nucleoside triphosphate biosynthetic process	8/368	74/13890	0.000738113	0.0392122	0.0370877	TMSB4X/ATP5PB/CTPS1/NME1/ATP5PD/DTYMK/ATP5F1C/NME4	8
GO:0010948	BP	GO:0010948	negative regulation of cell cycle process	19/368	315/13890	0.000753944	0.0394371	0.0373004	PSMB4/CDKN2A/AURKAIP1/NAA10/PSMD4/E2F1/PSMC5/PSMA4/PSMB7/PSMB1/ANAPC15/PSMC3/NAE1/MACROH2A1/PCNA/PRMT1/CBX3/PTTG1/PCBP4	19
GO:0032984	BP	GO:0032984	protein-containing complex disassembly	19/368	316/13890	0.000783134	0.0401118	0.0379386	STMN1/MRPL55/MRPL36/AURKAIP1/NSF/MRPL57/SPTBN1/MRPS18C/STMN3/SUPT16H/MRPS25/NCKAP5/MRPL20/MRPS21/ADD2/CHMP3/SMARCA4/MRPS18A/MRPL23	19
GO:0002758	BP	GO:0002758	innate immune response-activating signal transduction	9/368	93/13890	0.000790439	0.0401118	0.0379386	PSMB4/HRAS/PSMD4/PSMC5/PSMA4/PSMB7/PSMB1/PSMC3/PLCG2	9
GO:0032543	BP	GO:0032543	mitochondrial translation	11/368	135/13890	0.000926751	0.0463375	0.043827	MRPL55/MRPL36/AURKAIP1/MRPL57/MRPS18C/MRPS25/MRPL20/MRPS21/C1QBP/MRPS18A/MRPL23	11
GO:0098798	CC	GO:0098798	mitochondrial protein complex	30/387	247/14516	3.6602e-12	4.70889e-10	4.13945e-10	DMAC1/ATP5PB/NDUFV3/NDUFV1/MRPL55/MRPL36/SMDT1/MICOS13/MRPL57/NDUFA3/NDUFB10/NDUFB6/ATP5PD/TIMM10/MRPS18C/NDUFB2/NDUFB8/NDUFV2/NDUFA13/MICOS10/MRPL20/MRPS21/ATP5F1C/NDUFA2/TIMM8B/NDUFB3/NDUFC2/NDUFB4/MRPS18A/MRPL23	30
GO:0005747	CC	GO:0005747	mitochondrial respiratory chain complex I	14/387	44/14516	4.03331e-12	4.70889e-10	4.13945e-10	DMAC1/NDUFV3/NDUFV1/NDUFA3/NDUFB10/NDUFB6/NDUFB2/NDUFB8/NDUFV2/NDUFA13/NDUFA2/NDUFB3/NDUFC2/NDUFB4	14
GO:0030964	CC	GO:0030964	NADH dehydrogenase complex	14/387	44/14516	4.03331e-12	4.70889e-10	4.13945e-10	DMAC1/NDUFV3/NDUFV1/NDUFA3/NDUFB10/NDUFB6/NDUFB2/NDUFB8/NDUFV2/NDUFA13/NDUFA2/NDUFB3/NDUFC2/NDUFB4	14
GO:0045271	CC	GO:0045271	respiratory chain complex I	14/387	44/14516	4.03331e-12	4.70889e-10	4.13945e-10	DMAC1/NDUFV3/NDUFV1/NDUFA3/NDUFB10/NDUFB6/NDUFB2/NDUFB8/NDUFV2/NDUFA13/NDUFA2/NDUFB3/NDUFC2/NDUFB4	14
GO:0098800	CC	GO:0098800	inner mitochondrial membrane protein complex	21/387	123/14516	1.05028e-11	9.80965e-10	8.62338e-10	DMAC1/ATP5PB/NDUFV3/NDUFV1/SMDT1/MICOS13/NDUFA3/NDUFB10/NDUFB6/ATP5PD/TIMM10/NDUFB2/NDUFB8/NDUFV2/NDUFA13/MICOS10/ATP5F1C/NDUFA2/NDUFB3/NDUFC2/NDUFB4	21
GO:0005743	CC	GO:0005743	mitochondrial inner membrane	37/387	445/14516	8.42009e-10	6.55364e-08	5.76112e-08	DMAC1/ATP5PB/NDUFV3/NDUFV1/MRPL55/MRPL36/AURKAIP1/SMDT1/MICOS13/TMEM14B/MRPL57/NDUFA3/NDUFB10/NDUFB6/ATP5PD/TIMM10/MRPS18C/NDUFB2/NDUFB8/NDUFV2/MRPS25/NDUFA13/MICOS10/MRPL20/MRPS21/ATP5F1C/NDUFA2/NME4/TIMM8B/NDUFB3/NDUFC2/UCP2/BCL2L1/NDUFB4/MRPS18A/MRPL23/ENDOG	37
GO:0019866	CC	GO:0019866	organelle inner membrane	39/387	499/14516	1.70692e-09	1.13876e-07	1.00105e-07	DMAC1/ATP5PB/NDUFV3/NDUFV1/MRPL55/MRPL36/AURKAIP1/SMDT1/MICOS13/TMEM14B/MRPL57/NDUFA3/NDUFB10/ARL6IP6/NDUFB6/ATP5PD/TIMM10/MRPS18C/NDUFB2/NDUFB8/NDUFV2/MRPS25/NDUFA13/MICOS10/MRPL20/MRPS21/ATP5F1C/NDUFA2/NME4/TIMM8B/NDUFB3/NDUFC2/UCP2/CBX3/BCL2L1/NDUFB4/MRPS18A/MRPL23/ENDOG	39
GO:0098803	CC	GO:0098803	respiratory chain complex	14/387	71/14516	4.38906e-09	2.56211e-07	2.25228e-07	DMAC1/NDUFV3/NDUFV1/NDUFA3/NDUFB10/NDUFB6/NDUFB2/NDUFB8/NDUFV2/NDUFA13/NDUFA2/NDUFB3/NDUFC2/NDUFB4	14
GO:0005746	CC	GO:0005746	mitochondrial respirasome	14/387	76/14516	1.11017e-08	5.76057e-07	5.06395e-07	DMAC1/NDUFV3/NDUFV1/NDUFA3/NDUFB10/NDUFB6/NDUFB2/NDUFB8/NDUFV2/NDUFA13/NDUFA2/NDUFB3/NDUFC2/NDUFB4	14
GO:0044815	CC	GO:0044815	DNA packaging complex	15/387	91/14516	1.61625e-08	7.54788e-07	6.63512e-07	H3C2/H4C3/H1-5/H3-3A/H2AC20/H2AC11/H1-2/H4C5/H1-4/H2BC4/NCAPD3/H2AC17/MACROH2A1/H2BC5/H2AC15	15
GO:0000786	CC	GO:0000786	nucleosome	14/387	83/14516	3.60633e-08	1.51743e-06	1.33393e-06	H3C2/H4C3/H1-5/H3-3A/H2AC20/H2AC11/H1-2/H4C5/H1-4/H2BC4/H2AC17/MACROH2A1/H2BC5/H2AC15	14
GO:1990204	CC	GO:1990204	oxidoreductase complex	15/387	97/14516	3.94327e-08	1.51743e-06	1.33393e-06	DMAC1/NDUFV3/NDUFV1/NDUFA3/NDUFB10/NDUFB6/NDUFB2/NDUFB8/NDUFV2/NDUFA13/GCSH/NDUFA2/NDUFB3/NDUFC2/NDUFB4	15
GO:0070469	CC	GO:0070469	respirasome	14/387	84/14516	4.22412e-08	1.51743e-06	1.33393e-06	DMAC1/NDUFV3/NDUFV1/NDUFA3/NDUFB10/NDUFB6/NDUFB2/NDUFB8/NDUFV2/NDUFA13/NDUFA2/NDUFB3/NDUFC2/NDUFB4	14
GO:0032993	CC	GO:0032993	protein-DNA complex	18/387	175/14516	1.02006e-06	3.40262e-05	2.99114e-05	H3C2/H4C3/H1-5/H3-3A/H2AC20/H2AC11/H1-2/H4C5/H1-4/PRIM1/H2BC4/RPA3/H2AC17/MACROH2A1/PCNA/H2BC5/SOX12/H2AC15	18
GO:0000792	CC	GO:0000792	heterochromatin	10/387	75/14516	2.85769e-05	0.000889695	0.000782105	H1-5/H1-4/CDKN2A/WDR76/PHC2/NCAPD3/DNMT3A/MACROH2A1/CBX3/MBD3	10
GO:0005720	CC	GO:0005720	nuclear heterochromatin	6/387	32/14516	0.000173908	0.00507595	0.00446212	H1-5/H1-4/NCAPD3/DNMT3A/MACROH2A1/CBX3	6
GO:1905369	CC	GO:1905369	endopeptidase complex	8/387	66/14516	0.000353119	0.00970038	0.00852732	PSMB4/PSMD4/PSMC5/PSMA4/PSMB7/PSMB1/PSMC3/GPAA1	8
GO:0005759	CC	GO:0005759	mitochondrial matrix	25/387	456/14516	0.000545595	0.0141552	0.0124434	ATP5PB/MRPL55/MRPL36/SMDT1/ECI1/MRPL57/ARG2/DHX30/ETFB/MRPS18C/NDUFB8/SSBP1/DTYMK/MRPL20/GCSH/BLOC1S1/MRPS21/ATP5F1C/C1QBP/NME4/HSPE1/BCL2L1/MRPS18A/MRPL23/PIN4	25
GO:0000788	CC	GO:0000788	nuclear nucleosome	5/387	27/14516	0.000652846	0.0160463	0.0141058	H3C2/H4C3/H3-3A/H4C5/H1-4	5
GO:0005839	CC	GO:0005839	proteasome core complex	4/387	17/14516	0.000898681	0.0204658	0.0179909	PSMB4/PSMA4/PSMB7/PSMB1	4
GO:0005758	CC	GO:0005758	mitochondrial intermembrane space	8/387	76/14516	0.000920305	0.0204658	0.0179909	COX17/TIMM10/CHCHD5/COA4/DTYMK/BLOC1S1/NME4/TIMM8B	8
GO:0000502	CC	GO:0000502	proteasome complex	7/387	60/14516	0.00103739	0.022021	0.019358	PSMB4/PSMD4/PSMC5/PSMA4/PSMB7/PSMB1/PSMC3	7
GO:0046540	CC	GO:0046540	U4/U6 x U5 tri-snRNP complex	5/387	31/14516	0.00125901	0.0244983	0.0215357	TXNL4A/SNRPG/SNRPE/LSM4/LSM6	5
GO:0097526	CC	GO:0097526	spliceosomal tri-snRNP complex	5/387	31/14516	0.00125901	0.0244983	0.0215357	TXNL4A/SNRPG/SNRPE/LSM4/LSM6	5
GO:0031970	CC	GO:0031970	organelle envelope lumen	8/387	84/14516	0.00176996	0.0330629	0.0290646	COX17/TIMM10/CHCHD5/COA4/DTYMK/BLOC1S1/NME4/TIMM8B	8
GO:1905368	CC	GO:1905368	peptidase complex	8/387	86/14516	0.00205751	0.0369335	0.0324672	PSMB4/PSMD4/PSMC5/PSMA4/PSMB7/PSMB1/PSMC3/GPAA1	8
GO:0000313	CC	GO:0000313	organellar ribosome	8/387	87/14516	0.00221443	0.0369335	0.0324672	MRPL55/MRPL36/MRPL57/MRPS18C/MRPL20/MRPS21/MRPS18A/MRPL23	8
GO:0005761	CC	GO:0005761	mitochondrial ribosome	8/387	87/14516	0.00221443	0.0369335	0.0324672	MRPL55/MRPL36/MRPL57/MRPS18C/MRPL20/MRPS21/MRPS18A/MRPL23	8
GO:0003954	MF	GO:0003954	NADH dehydrogenase activity	13/377	39/14257	1.09726e-11	2.06286e-09	2.00973e-09	NDUFV3/NDUFV1/NDUFA3/NDUFB10/NDUFB6/NDUFB2/NDUFB8/NDUFV2/NDUFA13/NDUFA2/NDUFB3/NDUFC2/NDUFB4	13
GO:0008137	MF	GO:0008137	NADH dehydrogenase (ubiquinone) activity	13/377	39/14257	1.09726e-11	2.06286e-09	2.00973e-09	NDUFV3/NDUFV1/NDUFA3/NDUFB10/NDUFB6/NDUFB2/NDUFB8/NDUFV2/NDUFA13/NDUFA2/NDUFB3/NDUFC2/NDUFB4	13
GO:0050136	MF	GO:0050136	NADH dehydrogenase (quinone) activity	13/377	39/14257	1.09726e-11	2.06286e-09	2.00973e-09	NDUFV3/NDUFV1/NDUFA3/NDUFB10/NDUFB6/NDUFB2/NDUFB8/NDUFV2/NDUFA13/NDUFA2/NDUFB3/NDUFC2/NDUFB4	13
GO:0016655	MF	GO:0016655	oxidoreductase activity, acting on NAD(P)H, quinone or similar compound as acceptor	13/377	52/14257	6.28217e-10	8.85786e-08	8.62972e-08	NDUFV3/NDUFV1/NDUFA3/NDUFB10/NDUFB6/NDUFB2/NDUFB8/NDUFV2/NDUFA13/NDUFA2/NDUFB3/NDUFC2/NDUFB4	13
GO:0031491	MF	GO:0031491	nucleosome binding	13/377	67/14257	1.75279e-08	1.97715e-06	1.92623e-06	H1-5/H3-3A/H1-2/HMGN2/H1-4/SUPT16H/NAP1L4/MACROH2A1/VRK1/HMGN3/PWWP3A/SMARCA4/MBD3	13
GO:0016651	MF	GO:0016651	oxidoreductase activity, acting on NAD(P)H	14/377	93/14257	1.43208e-07	1.34616e-05	1.31148e-05	NDUFV3/NDUFV1/NDUFA3/NDUFB10/NDUFB6/NDUFB2/TXNDC17/NDUFB8/NDUFV2/NDUFA13/NDUFA2/NDUFB3/NDUFC2/NDUFB4	14
GO:0031492	MF	GO:0031492	nucleosomal DNA binding	9/377	37/14257	3.7126e-07	2.9913e-05	2.91425e-05	H1-5/H3-3A/H1-2/HMGN2/H1-4/MACROH2A1/HMGN3/SMARCA4/MBD3	9
GO:0046982	MF	GO:0046982	protein heterodimerization activity	20/377	273/14257	3.99397e-05	0.00281575	0.00274322	H3C2/H4C3/H3-3A/H2AC20/H2AC11/H4C5/GTF2A2/TAF11/H2BC4/H2AC17/RALGAPA1/CENPW/NAE1/MACROH2A1/H2BC5/ADD2/LSM6/GABBR2/H2AC15/BCL2L1	20
GO:0005200	MF	GO:0005200	structural constituent of cytoskeleton	9/377	79/14257	0.00023097	0.0144741	0.0141013	TUBA1A/TUBA1B/TUBA4A/INA/SPTBN1/ARPC5/EPB41/ANK2/ADD2	9
GO:0031490	MF	GO:0031490	chromatin DNA binding	9/377	94/14257	0.000843834	0.0446812	0.0435304	H1-5/H3-3A/H1-2/HMGN2/H1-4/MACROH2A1/HMGN3/SMARCA4/MBD3	9
GO:0004298	MF	GO:0004298	threonine-type endopeptidase activity	4/377	17/14257	0.000871442	0.0446812	0.0435304	PSMB4/PSMA4/PSMB7/PSMB1	4
