# Supplementary material for: Early Mechanisms of Chemoresistance in Retinoblastoma
Source: Cancers (Basel). 2022 Oct 10;14(19):4966. doi: 10.3390/cancers14194966 (PMC9563111; doi:10.3390/cancers14194966)
Supplement: Supplementary file 1 [file cancers-14-04966-s001.zip › Table S4_metascape_result.xlsx]

## Sheet: Annotation
MyList	Gene ID	Type	Tax ID	Homologene Gene ID	Homologene Gene Tax ID	Gene Symbol	Description	Biological Process (GO)	Kinase Class (UniProt)	Protein Function (Protein Atlas)	Subcellular Location (Protein Atlas)	Drug (DrugBank)	Canonical Pathways	Hallmark Gene Sets	hsa04151 PI3K-Akt signaling pathway	R-HSA-5673001 RAF/MAP kinase cascade	WP2882 Nuclear receptors meta-pathway	GO:0035239 tube morphogenesis	GO:0045124 regulation of bone resorption	WP3624 Lung fibrosis	GO:0001503 ossification	GO:0031099 regeneration	WP4673 Male infertility	GO:0001655 urogenital system development	WP2840 Hair follicle development: cyt	GO:0030855 epithelial cell differentiatio	GO:0009611 response to wounding	GO:0035270 endocrine system development	hsa04926 Relaxin signaling pathway	WP98 Prostaglandin synthesis and re	GO:0006954 inflammatory response	GO:0045765 regulation of angiogenesis	GO:0006304 DNA modification	GO:0034308 primary alcohol metabolic proc
PIWIL2	55124	symbol	H. sapiens	55124	H. sapiens	PIWIL2	piwi like RNA-mediated gene silencing 2	GO:0060903 positive regulation of meiosis I;GO:0030718 germ-line stem cell population maintenance;GO:0060631 regulation of meiosis I		Predicted intracellular proteins					0	1	0	0	0	0	1	0	1	0	0	0	0	0	0	0	0	0	1	0
CLU	1191	symbol	H. sapiens	1191	H. sapiens	CLU	clusterin	GO:1902847 regulation of neuronal signal transduction;GO:1902998 positive regulation of neurofibrillary tangle assembly;GO:1905891 regulation of cellular response to thapsigargin		Predicted intracellular proteins; Predicted secreted proteins; Cancer-related genes:Candidate cancer biomarkers; Candidate cardiovascular disease genes	Cytosol (Supported)	Zinc; Copper; Zinc acetate; Zinc chloride; Zinc sulfate, unspecified form	(M254)PID MYC REPRESS PATHWAY	(M5892)HALLMARK CHOLESTEROL HOMEOSTASIS; (M5946)HALLMARK COAGULATION; (M5902)HALLMARK APOPTOSIS	1	1	1	0	0	0	0	0	1	0	1	0	0	1	0	0	1	0	1	0
PDK4	5166	symbol	H. sapiens	5166	H. sapiens	PDK4	pyruvate dehydrogenase kinase 4	GO:0010510 regulation of acetyl-CoA biosynthetic process from pyruvate;GO:0050812 regulation of acyl-CoA biosynthetic process;GO:0042762 regulation of sulfur metabolic process	Atypical: PDK/BCKDK protein kinase family	Kinases:Atypical kinases; ENZYME proteins:Transferases; Predicted intracellular proteins; Enzymes		Tretinoin; 4-[4-(4-methoxyphenyl)-5-methyl-1H-pyrazol-3-yl]benzene-1,3-diol		(M5934)HALLMARK XENOBIOTIC METABOLISM; (M5936)HALLMARK OXIDATIVE PHOSPHORYLATION	1	0	1	0	1	0	1	1	0	0	0	0	0	0	0	0	0	0	1	0
ABCC4	10257	symbol	H. sapiens	10257	H. sapiens	ABCC4	ATP binding cassette subfamily C member 4	GO:0070730 cAMP transport;GO:0032310 prostaglandin secretion;GO:0015732 prostaglandin transport		ENZYME proteins; Enzymes; Transporters:Primary Active Transporters	Plasma membrane (Supported); Additional: Golgi apparatus;Nucleoli	ATP		(M5908)HALLMARK ANDROGEN RESPONSE	0	0	1	0	0	0	0	0	0	0	1	0	0	0	0	1	0	0	0	0
ACTA2	59	symbol	H. sapiens	59	H. sapiens	ACTA2	actin alpha 2, smooth muscle	GO:0061873 regulation of hepatic stellate cell contraction;GO:0061874 positive regulation of hepatic stellate cell contraction;GO:0061869 regulation of hepatic stellate cell migration		Disease related genes; Human disease related genes:Congenital malformations:Congenital malformations of the circulatory system; Predicted intracellular proteins; Human disease related genes:Cardiovascular diseases:Vascular diseases	Actin filaments (Supported)	Phenethyl Isothiocyanate	(M186)PID PDGFRB PATHWAY	(M5930)HALLMARK EPITHELIAL MESENCHYMAL TRANSITION	1	0	1	1	0	0	0	0	0	1	0	1	0	0	1	0	0	0	0	0
MMP2	4313	symbol	H. sapiens	4313	H. sapiens	MMP2	matrix metallopeptidase 2	GO:0014012 peripheral nervous system axon regeneration;GO:0001957 intramembranous ossification;GO:0036072 direct ossification		Predicted intracellular proteins; ENZYME proteins:Hydrolases; Human disease related genes:Cancers:Cancers of male genital organs; Human disease related genes:Musculoskeletal diseases:Skeletal diseases; Predicted secreted proteins; Candidate cardiovascular disease genes; Disease related genes; Human disease related genes:Cancers:Cancers of the breast and female genital organs; Potential drug targe…	Vesicles (Approved)	Marimastat; Captopril; SC-74020; Halofuginone; AE-941; Endostatin	(M63)PID AVB3 OPN PATHWAY; (M240)PID SYNDECAN 2 PATHWAY; (M65)PID FRA PATHWAY	(M5946)HALLMARK COAGULATION; (M5902)HALLMARK APOPTOSIS; (M5915)HALLMARK APICAL JUNCTION	1	1	1	1	1	1	1	1	1	1	0	0	1	0	1	0	1	0	0	0
GFRA1	2674	symbol	H. sapiens	2674	H. sapiens	GFRA1	GDNF family receptor alpha 1	GO:0035860 glial cell-derived neurotrophic factor receptor signaling pathway;GO:0038179 neurotrophin signaling pathway;GO:0008584 male gonad development			Golgi apparatus (Approved); Additional: Nucleoplasm		(M82)PID RET PATHWAY; (M142)PID AJDISS 2PATHWAY	(M5906)HALLMARK ESTROGEN RESPONSE EARLY	1	1	0	0	0	0	1	0	0	1	0	0	0	0	0	0	0	0	0	0
PTPN3	5774	symbol	H. sapiens	5774	H. sapiens	PTPN3	protein tyrosine phosphatase non-receptor type 3	GO:0098902 regulation of membrane depolarization during action potential;GO:0051045 negative regulation of membrane protein ectodomain proteolysis;GO:0051043 regulation of membrane protein ectodomain proteolysis		Predicted intracellular proteins; Enzymes; ENZYME proteins:Hydrolases					1	1	0	0	0	0	0	1	1	0	0	0	0	0	0	0	0	0	0	0
PTGER3	5733	symbol	H. sapiens	5733	H. sapiens	PTGER3	prostaglandin E receptor 3	GO:0014827 intestine smooth muscle contraction;GO:0014831 gastro-intestinal system smooth muscle contraction;GO:0060455 negative regulation of gastric acid secretion		G-protein coupled receptors:GPCRs excl olfactory receptors; FDA approved drug targets:Small molecule drugs; FDA approved drug targets:Biotech drugs		Bimatoprost; Dinoprostone; Misoprostol; Gemeprost; Limaprost; Castor oil		(M5905)HALLMARK ADIPOGENESIS; (M5907)HALLMARK ESTROGEN RESPONSE LATE	1	1	0	0	0	0	0	0	0	0	0	0	1	0	1	1	1	0	0	0
MUC16	94025	symbol	H. sapiens	94025	H. sapiens	MUC16	mucin 16, cell surface associated	GO:0007155 cell adhesion;GO:0009987 cellular process;GO:0008150 biological_process		Predicted secreted proteins		Oregovomab	(M5880)NABA ECM AFFILIATED; (M5885)NABA MATRISOME ASSOCIATED; (M5889)NABA MATRISOME		0	0	0	0	0	0	0	0	0	0	0	0	0	0	0	0	0	0	0	0
GLS2	27165	symbol	H. sapiens	27165	H. sapiens	GLS2	glutaminase 2	GO:0006543 glutamine catabolic process;GO:0006537 glutamate biosynthetic process;GO:0043650 dicarboxylic acid biosynthetic process		Predicted intracellular proteins; Enzymes; ENZYME proteins:Hydrolases		Glutamic acid		(M5939)HALLMARK P53 PATHWAY	0	1	0	0	0	0	0	1	0	0	0	0	0	0	0	0	0	0	0	0
EPHA2	1969	symbol	H. sapiens	1969	H. sapiens	EPHA2	EPH receptor A2	GO:0060034 notochord cell differentiation;GO:0060035 notochord cell development;GO:0014028 notochord formation	Tyr protein kinase family	FDA approved drug targets:Small molecule drugs; RAS pathway related proteins; ENZYME proteins:Transferases; Cancer-related genes:Mutated cancer genes; Disease related genes; Human disease related genes:Nervous system diseases:Eye disease; Kinases:Tyr protein kinases; Enzymes; Cancer-related genes:Candidate cancer biomarkers	Cell Junctions;Plasma membrane (Supported); Additional: Golgi apparatus;Nuclear speckles	Dasatinib; Phosphoaminophosphonic Acid-Adenylate Ester; Regorafenib; Fostamatinib	(M273)PID EPHA2 FWD PATHWAY; (M177)PID EPHA FWDPATHWAY; (M86)PID ARF6 PATHWAY	(M5934)HALLMARK XENOBIOTIC METABOLISM; (M5939)HALLMARK P53 PATHWAY	1	1	1	1	0	1	1	0	0	0	0	1	0	0	0	0	1	1	0	0
CYP1B1	1545	symbol	H. sapiens	1545	H. sapiens	CYP1B1	cytochrome P450 family 1 subfamily B member 1	GO:0071387 cellular response to cortisol stimulus;GO:0002930 trabecular meshwork development;GO:0071603 endothelial cell-cell adhesion		Predicted intracellular proteins; Human disease related genes:Congenital malformations:Congenital malformations of eye; ENZYME proteins:Lyases; Disease related genes; ENZYME proteins:Oxidoreductases; Potential drug targets; Enzymes	Mitochondria (Uncertain)	Genistein; 2-Methoxyestradiol; Naringenin; Quercetin; beta-Naphthoflavone; Flavone; Cannabidiol; Nabiximols			1	1	1	1	1	0	1	0	1	1	0	0	0	1	0	0	0	1	1	1
PPL	5493	symbol	H. sapiens	5493	H. sapiens	PPL	periplakin	GO:0031424 keratinization;GO:0045104 intermediate filament cytoskeleton organization;GO:0045103 intermediate filament-based process		Predicted intracellular proteins	Plasma membrane (Approved); Additional: Cytosol;Nucleoplasm				0	0	0	0	0	0	0	0	0	0	0	1	1	0	0	0	0	0	0	0
PPM1D	8493	symbol	H. sapiens	8493	H. sapiens	PPM1D	protein phosphatase, Mg2+/Mn2+ dependent 1D	GO:0035970 peptidyl-threonine dephosphorylation;GO:0030330 DNA damage response, signal transduction by p53 class mediator;GO:0031507 heterochromatin assembly		Predicted intracellular proteins; ENZYME proteins:Hydrolases; Cancer-related genes:Mutated cancer genes; Disease related genes; Potential drug targets; Enzymes; Cancer-related genes:Candidate cancer biomarkers; Human disease related genes:Other diseases:Mental and behavioural disorders	Nucleoplasm (Supported); Additional: Nucleoli		(M261)PID P53 REGULATION PATHWAY	(M5925)HALLMARK E2F TARGETS; (M5939)HALLMARK P53 PATHWAY	1	0	0	0	1	0	0	0	0	0	0	0	0	0	0	0	0	0	1	0
SIX1	6495	symbol	H. sapiens	6495	H. sapiens	SIX1	SIX homeobox 1	GO:2000729 positive regulation of mesenchymal cell proliferation involved in ureter development;GO:1905243 cellular response to 3,3',5-triiodo-L-thyronine;GO:0072191 ureter smooth muscle development		Human disease related genes:Congenital malformations:Other congenital malformations; Human disease related genes:Nervous system diseases:Ear disease; Cancer-related genes; Disease related genes; Transcription factors:Helix-turn-helix domains; Predicted intracellular proteins	Nucleoplasm (Supported); Additional: Nucleoli				1	1	0	1	0	0	1	1	0	1	0	1	0	1	0	0	0	0	0	0
AKR1B10	57016	symbol	H. sapiens	57016	H. sapiens	AKR1B10	aldo-keto reductase family 1 member B10	GO:0006714 sesquiterpenoid metabolic process;GO:0016107 sesquiterpenoid catabolic process;GO:0016487 farnesol metabolic process		Predicted secreted proteins; ENZYME proteins:Oxidoreductases; Predicted intracellular proteins; Enzymes	Cytosol (Supported); Additional: Plasma membrane	Sulindac; Fidarestat; Tolrestat; Nicotinamide adenine dinucleotide phosphate; Exisulind; Zopolrestat		(M5956)HALLMARK KRAS SIGNALING DN	0	0	0	0	0	0	0	0	0	0	0	0	0	0	0	0	0	0	0	1
PPARGC1B	133522	symbol	H. sapiens	133522	H. sapiens	PPARGC1B	PPARG coactivator 1 beta	GO:0010694 positive regulation of alkaline phosphatase activity;GO:0060346 bone trabecula formation;GO:0010692 regulation of alkaline phosphatase activity		Human disease related genes:Endocrine and metabolic diseases:Other endocrine and metabolic diseases; Predicted intracellular proteins	Nucleoplasm (Supported); Additional: Cytosol	Amiodarone			0	0	1	1	1	0	1	0	0	0	0	0	0	0	0	1	0	0	0	0
SPP1	6696	symbol	H. sapiens	6696	H. sapiens	SPP1	secreted phosphoprotein 1	GO:0048683 regulation of collateral sprouting of intact axon in response to injury;GO:0048685 negative regulation of collateral sprouting of intact axon in response to injury;GO:2000866 positive regulation of estradiol secretion		Predicted secreted proteins; Cancer-related genes:Candidate cancer biomarkers	Golgi apparatus (Enhanced)		(M118)PID INTEGRIN A9B1 PATHWAY; (M63)PID AVB3 OPN PATHWAY; (M277)PID INTEGRIN A4B1 PATHWAY	(M5944)HALLMARK ANGIOGENESIS; (M5947)HALLMARK IL2 STAT5 SIGNALING; (M5930)HALLMARK EPITHELIAL MESENCHYMAL TRANSITION	1	1	0	0	1	1	1	0	0	1	0	0	1	0	1	0	1	0	0	1
ERBB3	2065	symbol	H. sapiens	2065	H. sapiens	ERBB3	erb-b2 receptor tyrosine kinase 3	GO:0055025 positive regulation of cardiac muscle tissue development;GO:0045844 positive regulation of striated muscle tissue development;GO:0048636 positive regulation of muscle organ development	Tyr protein kinase family	Predicted intracellular proteins; Human disease related genes:Congenital malformations:Congenital malformations of the musculoskeletal system; ENZYME proteins:Transferases; Human disease related genes:Endocrine and metabolic diseases:Diabetes; Predicted secreted proteins; Cancer-related genes:Mutated cancer genes; Disease related genes; Kinases:Tyr protein kinases; Potential drug targets; Enzymes…	Plasma membrane (Supported); Additional: Actin filaments	Tucatinib	(M201)PID ERBB NETWORK PATHWAY; (M175)PID ERBB2 ERBB3 PATHWAY; (M239)PID A6B1 A6B4 INTEGRIN PATHWAY	(M5902)HALLMARK APOPTOSIS; (M5909)HALLMARK MYOGENESIS	1	1	0	1	0	0	1	0	0	1	0	0	1	1	0	0	0	0	0	0
ABCA8	10351	symbol	H. sapiens	10351	H. sapiens	ABCA8	ATP binding cassette subfamily A member 8	GO:0006686 sphingomyelin biosynthetic process;GO:0006684 sphingomyelin metabolic process;GO:0033344 cholesterol efflux		Transporters:Primary Active Transporters	Nucleoplasm (Approved); Additional: Cytosol			(M5948)HALLMARK BILE ACID METABOLISM	0	0	1	0	0	0	0	0	0	0	0	0	0	0	0	0	0	0	0	1
EGFR	1956	symbol	H. sapiens	1956	H. sapiens	EGFR	epidermal growth factor receptor	GO:0010750 positive regulation of nitric oxide mediated signal transduction;GO:1900019 regulation of protein kinase C activity;GO:1900020 positive regulation of protein kinase C activity	Tyr protein kinase family	Human disease related genes:Cancers:Head and neck cancers; Human disease related genes:Immune system diseases:Other immune system diseases; Disease related genes; Human disease related genes:Cancers:Cancers of the breast and female genital organs; Cancer-related genes:Mutated cancer genes; Enzymes; FDA approved drug targets:Small molecule drugs; ENZYME proteins:Transferases; Human disease related…	Cell Junctions;Plasma membrane (Enhanced)	Cetuximab; Lidocaine; Gefitinib; Erlotinib; Lapatinib; Panitumumab; Alvocidib; IGN311; Matuzumab; Vandetanib; Rindopepimut; Canertinib; Pelitinib; Varlitinib; AV-412; S-{3-[(4-ANILINOQUINAZOLIN-6-YL)AMINO]-3-OXOPROPYL}-L-CYSTEINE; PD-168393; Afatinib; Osimertinib; Necitumumab; Foreskin keratinocyte (neonatal); Depatuxizumab mafodotin; Icotinib; Neratinib; Dacomitinib; Fostamatinib; Zalutumumab; B…	(M201)PID ERBB NETWORK PATHWAY; (M251)PID SYNDECAN 3 PATHWAY; (M184)PID ECADHERIN KERATINOCYTE PATHWAY	(M5910)HALLMARK PROTEIN SECRETION; (M5923)HALLMARK PI3K AKT MTOR SIGNALING; (M5891)HALLMARK HYPOXIA	1	1	1	1	0	1	1	0	0	1	1	0	0	0	1	0	1	0	0	0
FGF1	2246	symbol	H. sapiens	2246	H. sapiens	FGF1	fibroblast growth factor 1	GO:0060681 branch elongation involved in ureteric bud branching;GO:0060677 ureteric bud elongation;GO:1901509 regulation of endothelial tube morphogenesis		RAS pathway related proteins; Predicted secreted proteins; Cancer-related genes:Candidate cancer biomarkers; Predicted intracellular proteins; FDA approved drug targets:Small molecule drugs; FDA approved drug targets:Biotech drugs	Nucleoplasm (Supported)	Pentosan polysulfate; Amlexanox; Heparin; Sucrosofate; Formic acid; O2-Sulfo-Glucuronic Acid; N,O6-Disulfo-Glucosamine; Naphthalene Trisulfonate; Pazopanib; 5-aminonaphthalene-2-sulfonic acid; Foreskin fibroblast (neonatal); Foreskin keratinocyte (neonatal)	(M276)PID FGF PATHWAY; (M5883)NABA SECRETED FACTORS; (M5885)NABA MATRISOME ASSOCIATED		1	1	0	1	0	1	0	1	0	1	0	0	1	0	0	0	0	1	0	0
DSG1	1828	symbol	H. sapiens	1828	H. sapiens	DSG1	desmoglein 1	GO:0032570 response to progesterone;GO:0016339 calcium-dependent cell-cell adhesion via plasma membrane cell adhesion molecules;GO:0060135 maternal process involved in female pregnancy		Disease related genes; Human disease related genes:Congenital malformations:Congenital malformations of skin					0	0	0	0	1	0	0	0	0	1	1	0	0	0	0	0	0	0	0	0
CSF1R	1436	symbol	H. sapiens	1436	H. sapiens	CSF1R	colony stimulating factor 1 receptor	GO:0038145 macrophage colony-stimulating factor signaling pathway;GO:0120041 positive regulation of macrophage proliferation;GO:0061517 macrophage proliferation	Tyr protein kinase family	FDA approved drug targets:Small molecule drugs; Human disease related genes:Nervous system diseases:Neurodegenerative diseases; RAS pathway related proteins; Predicted intracellular proteins; ENZYME proteins:Transferases; CD markers; Disease related genes; Human disease related genes:Cancers:Cancers of the breast and female genital organs; Kinases:Tyr protein kinases; Enzymes; Cancer-related gene…	Plasma membrane;Vesicles (Supported)	Imatinib; Sunitinib; ABT-869; 5-CYANO-FURAN-2-CARBOXYLIC ACID [5-HYDROXYMETHYL-2-(4-METHYL-PIPERIDIN-1-YL)-PHENYL]-AMIDE; 6-CHLORO-3-(3-METHYLISOXAZOL-5-YL)-4-PHENYLQUINOLIN-2(1H)-ONE; Fostamatinib; Erdafitinib; Pexidartinib	(M91)PID TCPTP PATHWAY; (M50)PID PTP1B PATHWAY; (M160)PID AVB3 INTEGRIN PATHWAY		1	1	0	1	1	1	1	0	0	1	0	0	0	0	0	0	1	0	0	0
HOXB3	3213	symbol	H. sapiens	3213	H. sapiens	HOXB3	homeobox B3	GO:0021615 glossopharyngeal nerve morphogenesis;GO:0021563 glossopharyngeal nerve development;GO:0021546 rhombomere development		Transcription factors:Helix-turn-helix domains; Predicted intracellular proteins	Nucleoplasm (Supported)				1	0	0	1	0	1	1	0	0	0	0	0	0	1	0	0	0	0	0	0
PLK2	10769	symbol	H. sapiens	10769	H. sapiens	PLK2	polo like kinase 2	GO:0071866 negative regulation of apoptotic process in bone marrow cell;GO:0071865 regulation of apoptotic process in bone marrow cell;GO:0032486 Rap protein signal transduction	Other	ENZYME proteins:Transferases; Predicted intracellular proteins; Kinases; Enzymes	Cytosol;Mitochondria;Nucleoplasm (Approved)	Fostamatinib		(M5890)HALLMARK TNFA SIGNALING VIA NFKB; (M5939)HALLMARK P53 PATHWAY	1	1	1	0	0	0	0	0	0	0	0	0	0	0	0	0	0	1	0	0
ABCB1	5243	symbol	H. sapiens	5243	H. sapiens	ABCB1	ATP binding cassette subfamily B member 1	GO:0099040 ceramide translocation;GO:0099039 sphingolipid translocation;GO:0046864 isoprenoid transport		Predicted intracellular proteins; Human disease related genes:Immune system diseases:Other immune system diseases; Human disease related genes:Musculoskeletal diseases:Skeletal diseases; CD markers; Disease related genes; ENZYME proteins; Transporters:Primary Active Transporters; Cancer-related genes:Mutational cancer driver genes; Enzymes; Cancer-related genes:Candidate cancer biomarkers	Nucleoplasm;Plasma membrane (Approved); Additional: Focal adhesion sites	ATP; Medroxyprogesterone acetate; Roxithromycin; Fentanyl; Voacamine; Elacridar; Tesmilifene; FM-VP4; Zosuquidar; Tariquidar; Miltefosine; Tocofersolan; Hycanthone; Concanamycin A; Dexverapamil; Emopamil; Lomerizine; Tetrandrine; Dofequidar; Dexniguldipine; ONT-093; HM-30181; Desmethylsertraline; Reversin 121	(M255)PID HIF1 TFPATHWAY	(M5949)HALLMARK PEROXISOME; (M5941)HALLMARK UV RESPONSE UP; (M5947)HALLMARK IL2 STAT5 SIGNALING	0	1	1	0	0	0	0	0	1	0	0	0	0	0	0	0	1	0	0	1
KLF5	688	symbol	H. sapiens	688	H. sapiens	KLF5	Kruppel like factor 5	GO:0061586 positive regulation of transcription by transcription factor localization;GO:0099156 cell-cell signaling via exosome;GO:0014901 satellite cell activation involved in skeletal muscle regeneration		Transcription factors:Zinc-coordinating DNA-binding domains; Predicted intracellular proteins; Cancer-related genes:Candidate cancer biomarkers	Nucleoplasm (Supported); Additional: Golgi apparatus;Vesicles			(M5909)HALLMARK MYOGENESIS	0	0	0	1	0	1	0	1	0	0	0	1	0	0	0	0	0	0	0	0
LUC7L3	51747	symbol	H. sapiens	51747	H. sapiens	LUC7L3	LUC7 like 3 pre-mRNA splicing factor	GO:0006376 mRNA splice site selection;GO:0000245 spliceosomal complex assembly;GO:0022618 ribonucleoprotein complex assembly		Predicted intracellular proteins	Nuclear speckles (Enhanced)			(M5925)HALLMARK E2F TARGETS	0	0	0	0	0	0	0	0	0	0	0	0	0	0	0	0	0	0	0	0
COL6A3	1293	symbol	H. sapiens	1293	H. sapiens	COL6A3	collagen type VI alpha 3 chain	GO:0010951 negative regulation of endopeptidase activity;GO:0010466 negative regulation of peptidase activity;GO:0007517 muscle organ development		Human disease related genes:Nervous system diseases:Other nervous and sensory system diseases; Predicted secreted proteins; Disease related genes; Human disease related genes:Musculoskeletal diseases:Muscular diseases; Predicted intracellular proteins	Endoplasmic reticulum (Approved); Additional: Vesicles		(M5887)NABA BASEMENT MEMBRANES; (M3005)NABA COLLAGENS; (M198)PID SYNDECAN 1 PATHWAY	(M5909)HALLMARK MYOGENESIS; (M5930)HALLMARK EPITHELIAL MESENCHYMAL TRANSITION	1	0	0	0	0	1	1	1	0	0	0	0	0	0	0	0	0	0	0	0
DKK3	27122	symbol	H. sapiens	27122	H. sapiens	DKK3	dickkopf WNT signaling pathway inhibitor 3	GO:1902612 regulation of anti-Mullerian hormone signaling pathway;GO:1902613 negative regulation of anti-Mullerian hormone signaling pathway;GO:0032345 negative regulation of aldosterone metabolic process		Predicted secreted proteins	Vesicles (Supported); Additional: Cytosol;Nuclear bodies				1	0	0	0	0	0	0	1	0	0	1	0	0	1	0	0	0	0	0	1
ABCC3	8714	symbol	H. sapiens	8714	H. sapiens	ABCC3	ATP binding cassette subfamily C member 3	GO:0015779 glucuronoside transport;GO:1901656 glycoside transport;GO:0006855 xenobiotic transmembrane transport		Enzymes; ENZYME proteins; Transporters:Primary Active Transporters; Predicted intracellular proteins; Cancer-related genes:Candidate cancer biomarkers	Plasma membrane (Supported)			(M5934)HALLMARK XENOBIOTIC METABOLISM	0	0	1	0	0	0	0	0	0	0	0	0	0	0	0	0	0	0	0	0
FN1	2335	symbol	H. sapiens	2335	H. sapiens	FN1	fibronectin 1	GO:1904235 regulation of substrate-dependent cell migration, cell attachment to substrate;GO:1904237 positive regulation of substrate-dependent cell migration, cell attachment to substrate;GO:0150102 negative regulation of monocyte activation		Human disease related genes:Congenital malformations:Congenital malformations of the musculoskeletal system; Predicted secreted proteins; Candidate cardiovascular disease genes; Disease related genes; Cancer-related genes:Mutational cancer driver genes; Human disease related genes:Urinary system diseases:Kidney diseases; Predicted intracellular proteins; Cancer-related genes:Candidate cancer biom…		Zinc; Lanoteplase; Ocriplasmin; Zinc acetate; Zinc chloride; Zinc sulfate, unspecified form	(M212)PID INTEGRIN5 PATHWAY; (M118)PID INTEGRIN A9B1 PATHWAY; (M274)PID LYMPH ANGIOGENESIS PATHWAY	(M5946)HALLMARK COAGULATION; (M5921)HALLMARK COMPLEMENT; (M5930)HALLMARK EPITHELIAL MESENCHYMAL TRANSITION	1	1	0	1	0	1	1	0	0	1	1	0	1	0	1	0	1	0	0	0
ERBB4	2066	symbol	H. sapiens	2066	H. sapiens	ERBB4	erb-b2 receptor tyrosine kinase 4	GO:0021551 central nervous system morphogenesis;GO:0072046 establishment of planar polarity involved in nephron morphogenesis;GO:0038138 ERBB4-ERBB4 signaling pathway	Tyr protein kinase family	Human disease related genes:Nervous system diseases:Neurodegenerative diseases; Predicted intracellular proteins; ENZYME proteins:Transferases; Transporters:Accessory Factors Involved in Transport; Disease related genes; Cancer-related genes:Candidate cancer biomarkers; Kinases:Tyr protein kinases; Enzymes; FDA approved drug targets:Small molecule drugs		Afatinib; Fostamatinib; Brigatinib; Zanubrutinib	(M201)PID ERBB NETWORK PATHWAY; (M13)PID ERBB4 PATHWAY; (M295)SIG PIP3 SIGNALING IN CARDIAC MYOCTES		1	1	0	0	0	0	1	1	0	1	0	1	0	0	0	0	0	0	0	0
NOS1	4842	symbol	H. sapiens	4842	H. sapiens	NOS1	nitric oxide synthase 1	GO:0098923 retrograde trans-synaptic signaling by soluble gas;GO:0098924 retrograde trans-synaptic signaling by nitric oxide;GO:0051581 negative regulation of neurotransmitter uptake		Enzymes; ENZYME proteins:Oxidoreductases; Cancer-related genes:Candidate cancer biomarkers; Predicted intracellular proteins; FDA approved drug targets:Small molecule drugs	Plasma membrane (Supported); Additional: Nucleoplasm	Citrulline; Donepezil; Ketamine; L-N(omega)-Nitroarginine-2,4-L-diaminobutyric amide; Formic acid; 3-Bromo-7-Nitroindazole; N-{(4S)-4-Amino-5-[(2-aminoethyl)amino]pentyl}-N'-nitroguanidine; N-[3-(aminomethyl)benzyl]acetamidine; L-N(omega)-nitroarginine-(4R)-amino-L-proline amide; 1-hydroxy-2-isopropylguanidine; N-omega-propyl-L-arginine; 2-butyl-1-hydroxyguanidine; S-Ethyl-N-[4-(Trifluoromethyl)P…		(M5951)HALLMARK SPERMATOGENESIS; (M5909)HALLMARK MYOGENESIS; (M5956)HALLMARK KRAS SIGNALING DN	1	1	1	0	1	0	1	1	1	0	1	0	0	0	1	0	0	0	0	0
ENPP2	5168	symbol	H. sapiens	5168	H. sapiens	ENPP2	ectonucleotide pyrophosphatase/phosphodiesterase 2	GO:2000394 positive regulation of lamellipodium morphogenesis;GO:2000392 regulation of lamellipodium morphogenesis;GO:0034638 phosphatidylcholine catabolic process		ENZYME proteins:Hydrolases; Enzymes; Predicted secreted proteins; Predicted intracellular proteins; Cancer-related genes:Candidate cancer biomarkers	Golgi apparatus;Nucleoplasm (Approved); Additional: Actin filaments			(M5905)HALLMARK ADIPOGENESIS	1	0	0	0	0	1	0	0	0	0	0	0	0	0	0	0	1	1	0	1
FAT1	2195	symbol	H. sapiens	2195	H. sapiens	FAT1	FAT atypical cadherin 1	GO:0003412 establishment of epithelial cell apical/basal polarity involved in camera-type eye morphogenesis;GO:0045198 establishment of epithelial cell apical/basal polarity;GO:0030859 polarized epithelial cell differentiation		Predicted intracellular proteins; Cancer-related genes:Mutated cancer genes					1	0	0	1	0	0	0	0	0	0	0	1	0	0	0	0	1	0	0	0
PSMB9	5698	symbol	H. sapiens	5698	H. sapiens	PSMB9	proteasome 20S subunit beta 9	GO:2000116 regulation of cysteine-type endopeptidase activity;GO:0010498 proteasomal protein catabolic process;GO:0052548 regulation of endopeptidase activity		Peptidases:Threonine-type peptidases; Predicted intracellular proteins; ENZYME proteins:Hydrolases; Disease related genes; Enzymes; FDA approved drug targets:Small molecule drugs	Cytosol (Supported)	Carfilzomib		(M5911)HALLMARK INTERFERON ALPHA RESPONSE; (M5913)HALLMARK INTERFERON GAMMA RESPONSE; (M5921)HALLMARK COMPLEMENT	0	1	1	0	0	0	1	0	0	0	0	0	0	0	0	0	1	0	0	0
IGF1	3479	symbol	H. sapiens	3479	H. sapiens	IGF1	insulin like growth factor 1	GO:0060283 negative regulation of oocyte development;GO:1904073 regulation of trophectodermal cell proliferation;GO:1904075 positive regulation of trophectodermal cell proliferation		RAS pathway related proteins; Human disease related genes:Endocrine and metabolic diseases:Hypothalamus and pituitary gland diseases; Predicted secreted proteins; Disease related genes; Human disease related genes:Cancers:Cancers of the lung and pleura		N,N-Bis(3-(D-gluconamido)propyl)deoxycholamide; N-Dodecyl-N,N-Dimethyl-3-Ammonio-1-Propanesulfonate	(M295)SIG PIP3 SIGNALING IN CARDIAC MYOCTES; (M5883)NABA SECRETED FACTORS; (M5885)NABA MATRISOME ASSOCIATED	(M5909)HALLMARK MYOGENESIS; (M5934)HALLMARK XENOBIOTIC METABOLISM	1	1	0	1	0	1	1	1	1	1	1	0	1	0	1	0	1	0	1	1

## Sheet: Enrichment
GroupID	Category	Term	Description	LogP	Log(q-value)	InTerm_InList	Genes	Symbols
1_Summary	KEGG Pathway	hsa04151	PI3K-Akt signaling pathway	-10.5721	-6.22408	10/354	1293,1436,1956,1969,2065,2066,2246,2335,3479,6696,1545,3213,4313,5774,6495,27122,2674,5166,59,5168,10769,4842,1191,2195,8493,5733	COL6A3,CSF1R,EGFR,EPHA2,ERBB3,ERBB4,FGF1,FN1,IGF1,SPP1,CYP1B1,HOXB3,MMP2,PTPN3,SIX1,DKK3,GFRA1,PDK4,ACTA2,ENPP2,PLK2,NOS1,CLU,FAT1,PPM1D,PTGER3
1_Member	KEGG Pathway	hsa04151	PI3K-Akt signaling pathway	-10.5721	-6.22408	10/354	1293,1436,1956,1969,2065,2066,2246,2335,3479,6696	COL6A3,CSF1R,EGFR,EPHA2,ERBB3,ERBB4,FGF1,FN1,IGF1,SPP1
1_Member	GO Biological Processes	GO:0048732	gland development	-10.0322	-6.19333	10/402	1436,1545,1956,1969,2066,3213,4313,5774,6495,27122	CSF1R,CYP1B1,EGFR,EPHA2,ERBB4,HOXB3,MMP2,PTPN3,SIX1,DKK3
1_Member	GO Biological Processes	GO:0007169	transmembrane receptor protein tyrosine kinase signaling pathway	-10.0007	-6.19333	10/405	1436,1956,1969,2065,2066,2246,2674,3479,4313,5166	CSF1R,EGFR,EPHA2,ERBB3,ERBB4,FGF1,GFRA1,IGF1,MMP2,PDK4
1_Member	GO Biological Processes	GO:0030335	positive regulation of cell migration	-9.93934	-6.19333	11/560	59,1436,1545,1956,1969,2246,2335,3479,4313,5168,10769	ACTA2,CSF1R,CYP1B1,EGFR,EPHA2,FGF1,FN1,IGF1,MMP2,ENPP2,PLK2
1_Member	GO Biological Processes	GO:2000147	positive regulation of cell motility	-9.7464	-6.12706	11/584	59,1436,1545,1956,1969,2246,2335,3479,4313,5168,10769	ACTA2,CSF1R,CYP1B1,EGFR,EPHA2,FGF1,FN1,IGF1,MMP2,ENPP2,PLK2
1_Member	GO Biological Processes	GO:0051272	positive regulation of cellular component movement	-9.64536	-6.12706	11/597	59,1436,1545,1956,1969,2246,2335,3479,4313,5168,10769	ACTA2,CSF1R,CYP1B1,EGFR,EPHA2,FGF1,FN1,IGF1,MMP2,ENPP2,PLK2
1_Member	GO Biological Processes	GO:0040017	positive regulation of locomotion	-9.63003	-6.12706	11/599	59,1436,1545,1956,1969,2246,2335,3479,4313,5168,10769	ACTA2,CSF1R,CYP1B1,EGFR,EPHA2,FGF1,FN1,IGF1,MMP2,ENPP2,PLK2
1_Member	GO Biological Processes	GO:0007167	enzyme-linked receptor protein signaling pathway	-8.31414	-4.96607	10/606	1436,1956,1969,2065,2066,2246,2674,3479,4313,5166	CSF1R,EGFR,EPHA2,ERBB3,ERBB4,FGF1,GFRA1,IGF1,MMP2,PDK4
1_Member	WikiPathways	WP3932	Focal adhesion: PI3K-Akt-mTOR-signaling pathway	-8.19703	-4.89542	8/309	1436,1956,1969,2246,2335,3479,4842,6696	CSF1R,EGFR,EPHA2,FGF1,FN1,IGF1,NOS1,SPP1
1_Member	GO Biological Processes	GO:0070372	regulation of ERK1 and ERK2 cascade	-8.16431	-4.89542	8/312	59,1436,1956,1969,2066,2246,2335,3479	ACTA2,CSF1R,EGFR,EPHA2,ERBB4,FGF1,FN1,IGF1
1_Member	WikiPathways	WP4172	PI3K-Akt signaling pathway	-7.8248	-4.68084	8/345	1293,1436,1956,1969,2246,2335,3479,6696	COL6A3,CSF1R,EGFR,EPHA2,FGF1,FN1,IGF1,SPP1
1_Member	Reactome Gene Sets	R-HSA-9006934	Signaling by Receptor Tyrosine Kinases	-7.66774	-4.57494	9/521	1293,1956,2065,2066,2246,2335,3479,5774,6696	COL6A3,EGFR,ERBB3,ERBB4,FGF1,FN1,IGF1,PTPN3,SPP1
1_Member	GO Biological Processes	GO:0001934	positive regulation of protein phosphorylation	-7.48854	-4.4415	10/741	1191,1436,1956,2065,2066,2246,2674,3479,4842,5168	CLU,CSF1R,EGFR,ERBB3,ERBB4,FGF1,GFRA1,IGF1,NOS1,ENPP2
1_Member	GO Biological Processes	GO:0048729	tissue morphogenesis	-7.41923	-4.39338	9/557	59,1436,1956,1969,2066,2195,2246,4313,6495	ACTA2,CSF1R,EGFR,EPHA2,ERBB4,FAT1,FGF1,MMP2,SIX1
1_Member	GO Biological Processes	GO:0050730	regulation of peptidyl-tyrosine phosphorylation	-7.34782	-4.34217	7/258	1436,1956,2065,2066,2674,3479,5168	CSF1R,EGFR,ERBB3,ERBB4,GFRA1,IGF1,ENPP2
1_Member	KEGG Pathway	hsa04010	MAPK signaling pathway	-6.96134	-4.02568	7/294	1436,1956,1969,2065,2066,2246,3479	CSF1R,EGFR,EPHA2,ERBB3,ERBB4,FGF1,IGF1
1_Member	GO Biological Processes	GO:0002009	morphogenesis of an epithelium	-6.95878	-4.02568	8/447	1436,1956,1969,2066,2195,2246,4313,6495	CSF1R,EGFR,EPHA2,ERBB4,FAT1,FGF1,MMP2,SIX1
1_Member	WikiPathways	WP5087	Malignant pleural mesothelioma	-6.95878	-4.02568	8/447	59,1436,1956,1969,2246,2335,3479,4313	ACTA2,CSF1R,EGFR,EPHA2,FGF1,FN1,IGF1,MMP2
1_Member	GO Biological Processes	GO:0050731	positive regulation of peptidyl-tyrosine phosphorylation	-6.76194	-3.84524	6/188	1436,2065,2066,2674,3479,5168	CSF1R,ERBB3,ERBB4,GFRA1,IGF1,ENPP2
1_Member	GO Biological Processes	GO:0033674	positive regulation of kinase activity	-6.66174	-3.79079	8/489	1191,1436,1956,1969,2065,2066,2246,3479	CLU,CSF1R,EGFR,EPHA2,ERBB3,ERBB4,FGF1,IGF1
1_Member	GO Biological Processes	GO:0070374	positive regulation of ERK1 and ERK2 cascade	-6.34913	-3.55736	6/221	59,1436,1956,2066,2246,3479	ACTA2,CSF1R,EGFR,ERBB4,FGF1,IGF1
1_Member	GO Biological Processes	GO:0051347	positive regulation of transferase activity	-6.13064	-3.38463	8/575	1191,1436,1956,1969,2065,2066,2246,3479	CLU,CSF1R,EGFR,EPHA2,ERBB3,ERBB4,FGF1,IGF1
1_Member	GO Biological Processes	GO:0043408	regulation of MAPK cascade	-5.55054	-2.93907	8/688	59,1436,1956,1969,2066,2246,2335,3479	ACTA2,CSF1R,EGFR,EPHA2,ERBB4,FGF1,FN1,IGF1
1_Member	GO Biological Processes	GO:0006468	protein phosphorylation	-5.47689	-2.89224	8/704	1436,1956,1969,2065,2066,5166,8493,10769	CSF1R,EGFR,EPHA2,ERBB3,ERBB4,PDK4,PPM1D,PLK2
1_Member	KEGG Pathway	hsa05200	Pathways in cancer	-5.24913	-2.71398	7/531	1436,1956,2246,2335,3479,4313,5733	CSF1R,EGFR,FGF1,FN1,IGF1,MMP2,PTGER3
1_Member	GO Biological Processes	GO:0043549	regulation of kinase activity	-5.15865	-2.64943	8/778	1191,1436,1956,1969,2065,2066,2246,3479	CLU,CSF1R,EGFR,EPHA2,ERBB3,ERBB4,FGF1,IGF1
1_Member	KEGG Pathway	hsa04015	Rap1 signaling pathway	-5.0773	-2.58048	5/210	1436,1956,1969,2246,3479	CSF1R,EGFR,EPHA2,FGF1,IGF1
1_Member	GO Biological Processes	GO:0022612	gland morphogenesis	-4.99096	-2.50621	4/102	1436,1956,1969,4313	CSF1R,EGFR,EPHA2,MMP2
1_Member	KEGG Pathway	hsa04014	Ras signaling pathway	-4.8682	-2.41776	5/232	1436,1956,1969,2246,3479	CSF1R,EGFR,EPHA2,FGF1,IGF1
1_Member	GO Biological Processes	GO:0045860	positive regulation of protein kinase activity	-4.81046	-2.37088	6/409	1191,1436,1956,2065,2246,3479	CLU,CSF1R,EGFR,ERBB3,FGF1,IGF1
1_Member	WikiPathways	WP2848	Pluripotent stem cell differentiation pathway	-4.44699	-2.08119	3/48	1436,2246,3479	CSF1R,FGF1,IGF1
1_Member	GO Biological Processes	GO:0018108	peptidyl-tyrosine phosphorylation	-4.37831	-2.02587	4/146	1436,1956,1969,2066	CSF1R,EGFR,EPHA2,ERBB4
1_Member	GO Biological Processes	GO:0043410	positive regulation of MAPK cascade	-4.36123	-2.01748	6/492	59,1436,1956,2066,2246,3479	ACTA2,CSF1R,EGFR,ERBB4,FGF1,IGF1
1_Member	GO Biological Processes	GO:0018212	peptidyl-tyrosine modification	-4.34385	-2.00438	4/149	1436,1956,1969,2066	CSF1R,EGFR,EPHA2,ERBB4
1_Member	GO Biological Processes	GO:0061180	mammary gland epithelium development	-4.22225	-1.93864	3/57	1436,1969,2066	CSF1R,EPHA2,ERBB4
1_Member	GO Biological Processes	GO:0042531	positive regulation of tyrosine phosphorylation of STAT protein	-4.01213	-1.778	3/67	1436,2066,3479	CSF1R,ERBB4,IGF1
1_Member	GO Biological Processes	GO:0048015	phosphatidylinositol-mediated signaling	-3.88356	-1.66903	3/74	1436,2065,3479	CSF1R,ERBB3,IGF1
1_Member	GO Biological Processes	GO:0048017	inositol lipid-mediated signaling	-3.81564	-1.61059	3/78	1436,2065,3479	CSF1R,ERBB3,IGF1
1_Member	GO Biological Processes	GO:0042509	regulation of tyrosine phosphorylation of STAT protein	-3.75125	-1.56154	3/82	1436,2066,3479	CSF1R,ERBB4,IGF1
1_Member	GO Biological Processes	GO:0045859	regulation of protein kinase activity	-3.66312	-1.49997	6/660	1191,1436,1956,2065,2246,3479	CLU,CSF1R,EGFR,ERBB3,FGF1,IGF1
1_Member	GO Biological Processes	GO:0044403	biological process involved in symbiotic interaction	-3.51267	-1.39723	4/245	1436,1956,1969,2335	CSF1R,EGFR,EPHA2,FN1
1_Member	WikiPathways	WP4540	Hippo signaling regulation pathways	-3.50977	-1.39723	3/99	1436,1956,1969	CSF1R,EGFR,EPHA2
1_Member	GO Biological Processes	GO:0030879	mammary gland development	-3.2339	-1.17139	3/123	1436,1969,2066	CSF1R,EPHA2,ERBB4
1_Member	WikiPathways	WP4541	Hippo-Merlin signaling dysregulation	-3.2339	-1.17139	3/123	1436,1956,1969	CSF1R,EGFR,EPHA2
1_Member	WikiPathways	WP4223	Ras signaling	-2.72313	-0.767757	3/185	1436,1956,1969	CSF1R,EGFR,EPHA2
1_Member	GO Biological Processes	GO:0046777	protein autophosphorylation	-2.70984	-0.757968	3/187	1436,1956,2066	CSF1R,EGFR,ERBB4
1_Member	KEGG Pathway	hsa05202	Transcriptional misregulation in cancer	-2.67085	-0.724183	3/193	1436,3479,6495	CSF1R,IGF1,SIX1
1_Member	GO Biological Processes	GO:1903829	positive regulation of protein localization	-2.54309	-0.619897	4/448	1956,1969,2066,3479	EGFR,EPHA2,ERBB4,IGF1
1_Member	GO Biological Processes	GO:0021537	telencephalon development	-2.37425	-0.477964	3/246	1436,1956,2066	CSF1R,EGFR,ERBB4
2_Summary	Reactome Gene Sets	R-HSA-5673001	RAF/MAP kinase cascade	-8.53165	-5.08667	8/280	1956,2065,2066,2246,2335,2674,5698,5774,3479,4313,4842,5733,6696,1969,1545,5243,27165,10769,6495,1191,1436,55124	EGFR,ERBB3,ERBB4,FGF1,FN1,GFRA1,PSMB9,PTPN3,IGF1,MMP2,NOS1,PTGER3,SPP1,EPHA2,CYP1B1,ABCB1,GLS2,PLK2,SIX1,CLU,CSF1R,PIWIL2
2_Member	Reactome Gene Sets	R-HSA-5673001	RAF/MAP kinase cascade	-8.53165	-5.08667	8/280	1956,2065,2066,2246,2335,2674,5698,5774	EGFR,ERBB3,ERBB4,FGF1,FN1,GFRA1,PSMB9,PTPN3
2_Member	Reactome Gene Sets	R-HSA-5684996	MAPK1/MAPK3 signaling	-8.45952	-5.0657	8/286	1956,2065,2066,2246,2335,2674,5698,5774	EGFR,ERBB3,ERBB4,FGF1,FN1,GFRA1,PSMB9,PTPN3
2_Member	Reactome Gene Sets	R-HSA-5683057	MAPK family signaling cascades	-8.02625	-4.82431	8/325	1956,2065,2066,2246,2335,2674,5698,5774	EGFR,ERBB3,ERBB4,FGF1,FN1,GFRA1,PSMB9,PTPN3
2_Member	KEGG Pathway	hsa05205	Proteoglycans in cancer	-6.54058	-3.71102	6/205	1956,2065,2066,2335,3479,4313	EGFR,ERBB3,ERBB4,FN1,IGF1,MMP2
2_Member	GO Biological Processes	GO:0014066	regulation of phosphatidylinositol 3-kinase signaling	-6.45866	-3.64206	5/110	1956,2065,2066,2335,3479	EGFR,ERBB3,ERBB4,FN1,IGF1
2_Member	Reactome Gene Sets	R-HSA-8847993	ERBB2 Activates PTK6 Signaling	-6.21461	-3.44632	3/13	1956,2065,2066	EGFR,ERBB3,ERBB4
2_Member	KEGG Pathway	hsa04020	Calcium signaling pathway	-6.13983	-3.38463	6/240	1956,2065,2066,2246,4842,5733	EGFR,ERBB3,ERBB4,FGF1,NOS1,PTGER3
2_Member	Canonical Pathways	M201	PID ERBB NETWORK PATHWAY	-6.01376	-3.28894	3/15	1956,2065,2066	EGFR,ERBB3,ERBB4
2_Member	Reactome Gene Sets	R-HSA-6785631	ERBB2 Regulates Cell Motility	-6.01376	-3.28894	3/15	1956,2065,2066	EGFR,ERBB3,ERBB4
2_Member	Reactome Gene Sets	R-HSA-1963642	PI3K events in ERBB2 signaling	-5.92399	-3.20938	3/16	1956,2065,2066	EGFR,ERBB3,ERBB4
2_Member	Reactome Gene Sets	R-HSA-1250196	SHC1 events in ERBB2 signaling	-5.48705	-2.89485	3/22	1956,2065,2066	EGFR,ERBB3,ERBB4
2_Member	Reactome Gene Sets	R-HSA-9665686	Signaling by ERBB2 TMD/JMD mutants	-5.48705	-2.89485	3/22	1956,2065,2066	EGFR,ERBB3,ERBB4
2_Member	Reactome Gene Sets	R-HSA-2219530	Constitutive Signaling by Aberrant PI3K in Cancer	-5.45512	-2.8779	4/78	1956,2065,2066,2246	EGFR,ERBB3,ERBB4,FGF1
2_Member	GO Biological Processes	GO:0014068	positive regulation of phosphatidylinositol 3-kinase signaling	-5.43297	-2.86305	4/79	2065,2066,2335,3479	ERBB3,ERBB4,FN1,IGF1
2_Member	Reactome Gene Sets	R-HSA-9664565	Signaling by ERBB2 KD Mutants	-5.31404	-2.75471	3/25	1956,2065,2066	EGFR,ERBB3,ERBB4
2_Member	Reactome Gene Sets	R-HSA-1227990	Signaling by ERBB2 in Cancer	-5.26119	-2.7193	3/26	1956,2065,2066	EGFR,ERBB3,ERBB4
2_Member	WikiPathways	WP4300	Extracellular vesicles in the crosstalk of cardiac cells	-5.16162	-2.64943	3/28	1956,3479,6696	EGFR,IGF1,SPP1
2_Member	Reactome Gene Sets	R-HSA-8863795	Downregulation of ERBB2 signaling	-5.11459	-2.61162	3/29	1956,2065,2066	EGFR,ERBB3,ERBB4
2_Member	Reactome Gene Sets	R-HSA-2219528	PI3K/AKT Signaling in Cancer	-4.95755	-2.47871	4/104	1956,2065,2066,2246	EGFR,ERBB3,ERBB4,FGF1
2_Member	WikiPathways	WP2817	Mammary gland development pathway - Pregnancy and lactation (Stage 3 of 4)	-4.94208	-2.47482	3/33	1956,2065,2066	EGFR,ERBB3,ERBB4
2_Member	Reactome Gene Sets	R-HSA-6811558	PI5P, PP2A and IER3 Regulate PI3K/AKT Signaling	-4.92481	-2.46323	4/106	1956,2065,2066,2246	EGFR,ERBB3,ERBB4,FGF1
2_Member	Reactome Gene Sets	R-HSA-199418	Negative regulation of the PI3K/AKT network	-4.81506	-2.37088	4/113	1956,2065,2066,2246	EGFR,ERBB3,ERBB4,FGF1
2_Member	Reactome Gene Sets	R-HSA-5663202	Diseases of signal transduction by growth factor receptors and second messengers	-4.67108	-2.24209	6/433	1956,2065,2066,2246,2335,5698	EGFR,ERBB3,ERBB4,FGF1,FN1,PSMB9
2_Member	Reactome Gene Sets	R-HSA-1257604	PIP3 activates AKT signaling	-4.57529	-2.18146	5/267	1956,2065,2066,2246,5698	EGFR,ERBB3,ERBB4,FGF1,PSMB9
2_Member	GO Biological Processes	GO:0048146	positive regulation of fibroblast proliferation	-4.44699	-2.08119	3/48	1956,2335,3479	EGFR,FN1,IGF1
2_Member	Reactome Gene Sets	R-HSA-1227986	Signaling by ERBB2	-4.39348	-2.03663	3/50	1956,2065,2066	EGFR,ERBB3,ERBB4
2_Member	GO Biological Processes	GO:0070848	response to growth factor	-4.33201	-2.00097	6/498	1956,1969,2066,2246,2674,4842	EGFR,EPHA2,ERBB4,FGF1,GFRA1,NOS1
2_Member	Reactome Gene Sets	R-HSA-8848021	Signaling by PTK6	-4.29281	-1.98613	3/54	1956,2065,2066	EGFR,ERBB3,ERBB4
2_Member	Reactome Gene Sets	R-HSA-9006927	Signaling by Non-Receptor Tyrosine Kinases	-4.29281	-1.98613	3/54	1956,2065,2066	EGFR,ERBB3,ERBB4
2_Member	Reactome Gene Sets	R-HSA-9006925	Intracellular signaling by second messengers	-4.27345	-1.97503	5/309	1956,2065,2066,2246,5698	EGFR,ERBB3,ERBB4,FGF1,PSMB9
2_Member	KEGG Pathway	hsa05206	MicroRNAs in cancer	-4.2668	-1.97503	5/310	1545,1956,2065,5243,27165	CYP1B1,EGFR,ERBB3,ABCB1,GLS2
2_Member	Reactome Gene Sets	R-HSA-1236394	Signaling by ERBB4	-4.19958	-1.92706	3/58	1956,2065,2066	EGFR,ERBB3,ERBB4
2_Member	KEGG Pathway	hsa05218	Melanoma	-3.91897	-1.70123	3/72	1956,2246,3479	EGFR,FGF1,IGF1
2_Member	WikiPathways	WP306	Focal adhesion	-3.83245	-1.62426	4/202	1956,2335,3479,6696	EGFR,FN1,IGF1,SPP1
2_Member	GO Biological Processes	GO:0048145	regulation of fibroblast proliferation	-3.79923	-1.60345	3/79	1956,2335,3479	EGFR,FN1,IGF1
2_Member	KEGG Pathway	hsa01521	EGFR tyrosine kinase inhibitor resistance	-3.79923	-1.60345	3/79	1956,2065,3479	EGFR,ERBB3,IGF1
2_Member	WikiPathways	WP4806	EGFR tyrosine kinase inhibitor resistance	-3.72026	-1.53951	3/84	1956,2065,3479	EGFR,ERBB3,IGF1
2_Member	KEGG Pathway	hsa04012	ErbB signaling pathway	-3.70505	-1.53017	3/85	1956,2065,2066	EGFR,ERBB3,ERBB4
2_Member	WikiPathways	WP673	ErbB signaling pathway	-3.61755	-1.48432	3/91	1956,2065,2066	EGFR,ERBB3,ERBB4
2_Member	KEGG Pathway	hsa01522	Endocrine resistance	-3.52274	-1.40255	3/98	1956,3479,4313	EGFR,IGF1,MMP2
2_Member	GO Biological Processes	GO:0071363	cellular response to growth factor stimulus	-3.43391	-1.32389	5/468	1956,2066,2246,2674,4842	EGFR,ERBB4,FGF1,GFRA1,NOS1
2_Member	GO Biological Processes	GO:0045927	positive regulation of growth	-3.40873	-1.30369	4/261	1956,2066,2335,3479	EGFR,ERBB4,FN1,IGF1
2_Member	KEGG Pathway	hsa04068	FoxO signaling pathway	-3.15433	-1.10729	3/131	1956,3479,10769	EGFR,IGF1,PLK2
2_Member	KEGG Pathway	hsa05224	Breast cancer	-3.00945	-0.993817	3/147	1956,2246,3479	EGFR,FGF1,IGF1
2_Member	KEGG Pathway	hsa05226	Gastric cancer	-2.99252	-0.980906	3/149	1956,2246,5243	EGFR,FGF1,ABCB1
2_Member	WikiPathways	WP51	Regulation of actin cytoskeleton	-2.98414	-0.974526	3/150	1956,2246,2335	EGFR,FGF1,FN1
2_Member	WikiPathways	WP4262	Breast cancer pathway	-2.9271	-0.919477	3/157	1956,2246,3479	EGFR,FGF1,IGF1
2_Member	GO Biological Processes	GO:0030307	positive regulation of cell growth	-2.84269	-0.85635	3/168	1956,2335,3479	EGFR,FN1,IGF1
2_Member	GO Biological Processes	GO:0048639	positive regulation of developmental growth	-2.83531	-0.85464	3/169	2066,2335,3479	ERBB4,FN1,IGF1
2_Member	GO Biological Processes	GO:0050678	regulation of epithelial cell proliferation	-2.79377	-0.829513	4/382	1956,2246,3479,6495	EGFR,FGF1,IGF1,SIX1
2_Member	GO Biological Processes	GO:0000165	MAPK cascade	-2.75704	-0.796362	3/180	1956,3479,5774	EGFR,IGF1,PTPN3
2_Member	GO Biological Processes	GO:0042176	regulation of protein catabolic process	-2.73278	-0.773878	4/397	1191,1956,5774,10769	CLU,EGFR,PTPN3,PLK2
2_Member	GO Biological Processes	GO:0001558	regulation of cell growth	-2.64781	-0.704568	4/419	1956,2335,3479,6696	EGFR,FN1,IGF1,SPP1
2_Member	GO Biological Processes	GO:0050679	positive regulation of epithelial cell proliferation	-2.56706	-0.633957	3/210	1956,2246,3479	EGFR,FGF1,IGF1
2_Member	KEGG Pathway	hsa04810	Regulation of actin cytoskeleton	-2.52128	-0.601347	3/218	1956,2246,2335	EGFR,FGF1,FN1
2_Member	GO Biological Processes	GO:0071902	positive regulation of protein serine/threonine kinase activity	-2.48812	-0.574622	3/224	1436,1956,2246	CSF1R,EGFR,FGF1
2_Member	GO Biological Processes	GO:0007346	regulation of mitotic cell cycle	-2.32184	-0.428618	4/517	1956,3479,5774,10769	EGFR,IGF1,PTPN3,PLK2
2_Member	GO Biological Processes	GO:0090068	positive regulation of cell cycle process	-2.31203	-0.421841	3/259	1956,3479,55124	EGFR,IGF1,PIWIL2
3_Summary	WikiPathways	WP2882	Nuclear receptors meta-pathway	-8.05759	-4.82431	8/322	1545,1956,1969,5166,5243,8714,10257,10769,10351,5698,59,4313,4842,133522,1191	CYP1B1,EGFR,EPHA2,PDK4,ABCB1,ABCC3,ABCC4,PLK2,ABCA8,PSMB9,ACTA2,MMP2,NOS1,PPARGC1B,CLU
3_Member	WikiPathways	WP2882	Nuclear receptors meta-pathway	-8.05759	-4.82431	8/322	1545,1956,1969,5166,5243,8714,10257,10769	CYP1B1,EGFR,EPHA2,PDK4,ABCB1,ABCC3,ABCC4,PLK2
3_Member	GO Biological Processes	GO:0042908	xenobiotic transport	-6.67808	-3.7924	4/39	5243,8714,10257,10351	ABCB1,ABCC3,ABCC4,ABCA8
3_Member	Reactome Gene Sets	R-HSA-382556	ABC-family proteins mediated transport	-6.60126	-3.74565	5/103	5243,5698,8714,10257,10351	ABCB1,PSMB9,ABCC3,ABCC4,ABCA8
3_Member	KEGG Pathway	hsa02010	ABC transporters	-6.42253	-3.61853	4/45	5243,8714,10257,10351	ABCB1,ABCC3,ABCC4,ABCA8
3_Member	GO Biological Processes	GO:0003018	vascular process in circulatory system	-5.90862	-3.204	6/263	59,4313,4842,5243,8714,10257	ACTA2,MMP2,NOS1,ABCB1,ABCC3,ABCC4
3_Member	WikiPathways	WP2289	Drug induction of bile acid pathway	-5.84006	-3.1452	3/17	5243,8714,10257	ABCB1,ABCC3,ABCC4
3_Member	WikiPathways	WP5066	FOXA2 pathway	-5.55032	-2.93907	3/21	8714,10257,133522	ABCC3,ABCC4,PPARGC1B
3_Member	WikiPathways	WP2876	Pregnane X receptor pathway	-4.94208	-2.47482	3/33	5243,8714,10257	ABCB1,ABCC3,ABCC4
3_Member	GO Biological Processes	GO:0003013	circulatory system process	-4.33685	-2.00162	6/497	59,4313,4842,5243,8714,10257	ACTA2,MMP2,NOS1,ABCB1,ABCC3,ABCC4
3_Member	GO Biological Processes	GO:0015850	organic hydroxy compound transport	-4.26619	-1.97503	4/156	1191,8714,10257,10351	CLU,ABCC3,ABCC4,ABCA8
3_Member	GO Biological Processes	GO:0006869	lipid transport	-4.21448	-1.93808	5/318	1191,5243,8714,10257,10351	CLU,ABCB1,ABCC3,ABCC4,ABCA8
3_Member	GO Biological Processes	GO:0010876	lipid localization	-4.00106	-1.77356	5/353	1191,5243,8714,10257,10351	CLU,ABCB1,ABCC3,ABCC4,ABCA8
3_Member	GO Biological Processes	GO:0010232	vascular transport	-3.69003	-1.52381	3/86	5243,8714,10257	ABCB1,ABCC3,ABCC4
3_Member	GO Biological Processes	GO:0150104	transport across blood-brain barrier	-3.69003	-1.52381	3/86	5243,8714,10257	ABCB1,ABCC3,ABCC4
3_Member	KEGG Pathway	hsa04976	Bile secretion	-3.64603	-1.49936	3/89	5243,8714,10257	ABCB1,ABCC3,ABCC4
3_Member	Reactome Gene Sets	R-HSA-9748784	Drug ADME	-3.50977	-1.39723	3/99	5243,8714,10257	ABCB1,ABCC3,ABCC4
3_Member	WikiPathways	WP2884	NRF2 pathway	-3.01801	-1.00035	3/146	1969,8714,10257	EPHA2,ABCC3,ABCC4
3_Member	Reactome Gene Sets	R-HSA-382551	Transport of small molecules	-2.5776	-0.641147	5/729	5243,5698,8714,10257,10351	ABCB1,PSMB9,ABCC3,ABCC4,ABCA8
3_Member	GO Biological Processes	GO:0015849	organic acid transport	-2.289	-0.404821	3/264	5243,8714,10257	ABCB1,ABCC3,ABCC4
4_Summary	GO Biological Processes	GO:0035239	tube morphogenesis	-7.94362	-4.77164	10/663	688,1436,1545,1956,1969,2246,2335,3213,4313,6495,59,3479,133522,2065,2195	KLF5,CSF1R,CYP1B1,EGFR,EPHA2,FGF1,FN1,HOXB3,MMP2,SIX1,ACTA2,IGF1,PPARGC1B,ERBB3,FAT1
4_Member	GO Biological Processes	GO:0035239	tube morphogenesis	-7.94362	-4.77164	10/663	688,1436,1545,1956,1969,2246,2335,3213,4313,6495	KLF5,CSF1R,CYP1B1,EGFR,EPHA2,FGF1,FN1,HOXB3,MMP2,SIX1
4_Member	GO Biological Processes	GO:0001568	blood vessel development	-7.78412	-4.6665	9/505	59,688,1545,1969,2246,2335,3213,4313,6495	ACTA2,KLF5,CYP1B1,EPHA2,FGF1,FN1,HOXB3,MMP2,SIX1
4_Member	GO Biological Processes	GO:0001944	vasculature development	-7.63214	-4.56283	9/526	59,688,1545,1969,2246,2335,3213,4313,6495	ACTA2,KLF5,CYP1B1,EPHA2,FGF1,FN1,HOXB3,MMP2,SIX1
4_Member	GO Biological Processes	GO:0048514	blood vessel morphogenesis	-7.15796	-4.17162	8/421	688,1545,1969,2246,2335,3213,4313,6495	KLF5,CYP1B1,EPHA2,FGF1,FN1,HOXB3,MMP2,SIX1
4_Member	GO Biological Processes	GO:0001525	angiogenesis	-6.68463	-3.7924	7/323	688,1545,1969,2246,2335,3213,4313	KLF5,CYP1B1,EPHA2,FGF1,FN1,HOXB3,MMP2
4_Member	GO Biological Processes	GO:0001501	skeletal system development	-4.2984	-1.98613	6/505	1969,3213,3479,4313,6495,133522	EPHA2,HOXB3,IGF1,MMP2,SIX1,PPARGC1B
4_Member	GO Biological Processes	GO:0048705	skeletal system morphogenesis	-3.6533	-1.49936	4/225	3213,4313,6495,133522	HOXB3,MMP2,SIX1,PPARGC1B
4_Member	GO Biological Processes	GO:0001704	formation of primary germ layer	-3.33017	-1.23978	3/114	1969,2335,4313	EPHA2,FN1,MMP2
4_Member	GO Biological Processes	GO:0030155	regulation of cell adhesion	-3.25936	-1.18545	6/786	1545,1969,2065,2335,3479,4313	CYP1B1,EPHA2,ERBB3,FN1,IGF1,MMP2
4_Member	GO Biological Processes	GO:0060562	epithelial tube morphogenesis	-3.14422	-1.1015	4/307	1436,1969,2246,6495	CSF1R,EPHA2,FGF1,SIX1
4_Member	GO Biological Processes	GO:0048754	branching morphogenesis of an epithelial tube	-3.13523	-1.09679	3/133	1969,2246,6495	EPHA2,FGF1,SIX1
4_Member	GO Biological Processes	GO:0048598	embryonic morphogenesis	-3.02658	-1.00484	5/576	1969,2335,3213,4313,6495	EPHA2,FN1,HOXB3,MMP2,SIX1
4_Member	GO Biological Processes	GO:0007369	gastrulation	-2.89571	-0.892026	3/161	1969,2335,4313	EPHA2,FN1,MMP2
4_Member	GO Biological Processes	GO:0061138	morphogenesis of a branching epithelium	-2.88798	-0.888218	3/162	1969,2246,6495	EPHA2,FGF1,SIX1
4_Member	GO Biological Processes	GO:0001763	morphogenesis of a branching structure	-2.82069	-0.849192	3/171	1969,2246,6495	EPHA2,FGF1,SIX1
4_Member	GO Biological Processes	GO:0048568	embryonic organ development	-2.55356	-0.625448	4/445	1956,1969,3213,6495	EGFR,EPHA2,HOXB3,SIX1
4_Member	GO Biological Processes	GO:0090596	sensory organ morphogenesis	-2.29815	-0.412481	3/262	1969,2195,6495	EPHA2,FAT1,SIX1
4_Member	GO Biological Processes	GO:0048562	embryonic organ morphogenesis	-2.16825	-0.292937	3/292	1969,3213,6495	EPHA2,HOXB3,SIX1
4_Member	GO Biological Processes	GO:0043009	chordate embryonic development	-2.01925	-0.162537	4/632	1956,1969,3213,6495	EGFR,EPHA2,HOXB3,SIX1
5_Summary	GO Biological Processes	GO:0045124	regulation of bone resorption	-6.58857	-3.74565	4/41	1436,5166,6696,133522,1545,1828,4313,4842,8493	CSF1R,PDK4,SPP1,PPARGC1B,CYP1B1,DSG1,MMP2,NOS1,PPM1D
5_Member	GO Biological Processes	GO:0045124	regulation of bone resorption	-6.58857	-3.74565	4/41	1436,5166,6696,133522	CSF1R,PDK4,SPP1,PPARGC1B
5_Member	GO Biological Processes	GO:0046850	regulation of bone remodeling	-6.27128	-3.49141	4/49	1436,5166,6696,133522	CSF1R,PDK4,SPP1,PPARGC1B
5_Member	GO Biological Processes	GO:0034103	regulation of tissue remodeling	-5.28562	-2.73689	4/86	1436,5166,6696,133522	CSF1R,PDK4,SPP1,PPARGC1B
5_Member	GO Biological Processes	GO:0009725	response to hormone	-4.27516	-1.97503	7/753	1545,1828,4313,4842,5166,6696,133522	CYP1B1,DSG1,MMP2,NOS1,PDK4,SPP1,PPARGC1B
5_Member	GO Biological Processes	GO:0048545	response to steroid hormone	-3.3173	-1.23168	4/276	1545,1828,6696,133522	CYP1B1,DSG1,SPP1,PPARGC1B
5_Member	GO Biological Processes	GO:0007565	female pregnancy	-2.82798	-0.852817	3/170	1828,4313,6696	DSG1,MMP2,SPP1
5_Member	GO Biological Processes	GO:0044703	multi-organism reproductive process	-2.69018	-0.741785	3/190	1828,4313,6696	DSG1,MMP2,SPP1
5_Member	GO Biological Processes	GO:1901654	response to ketone	-2.66448	-0.719531	3/194	1545,1828,6696	CYP1B1,DSG1,SPP1
5_Member	GO Biological Processes	GO:0044706	multi-multicellular organism process	-2.63314	-0.693308	3/199	1828,4313,6696	DSG1,MMP2,SPP1
5_Member	GO Biological Processes	GO:0031667	response to nutrient levels	-2.55006	-0.62485	4/446	1545,5166,6696,8493	CYP1B1,PDK4,SPP1,PPM1D
5_Member	GO Biological Processes	GO:0009991	response to extracellular stimulus	-2.43924	-0.53677	4/479	1545,5166,6696,8493	CYP1B1,PDK4,SPP1,PPM1D
6_Summary	WikiPathways	WP3624	Lung fibrosis	-5.82816	-3.14284	4/63	2246,3479,4313,6696,1293,1436,2335,1956,688,1969,5168,3213	FGF1,IGF1,MMP2,SPP1,COL6A3,CSF1R,FN1,EGFR,KLF5,EPHA2,ENPP2,HOXB3
6_Member	WikiPathways	WP3624	Lung fibrosis	-5.82816	-3.14284	4/63	2246,3479,4313,6696	FGF1,IGF1,MMP2,SPP1
6_Member	Canonical Pathways	M160	PID AVB3 INTEGRIN PATHWAY	-5.54678	-2.93907	4/74	1293,1436,2335,6696	COL6A3,CSF1R,FN1,SPP1
6_Member	KEGG Pathway	hsa04510	Focal adhesion	-5.16958	-2.64943	5/201	1293,1956,2335,3479,6696	COL6A3,EGFR,FN1,IGF1,SPP1
6_Member	Reactome Gene Sets	R-HSA-381426	Regulation of Insulin-like Growth Factor (IGF) transport and uptake by Insulin-like Growth Factor Binding Proteins (IGFBPs)	-4.64244	-2.22887	4/125	2335,3479,4313,6696	FN1,IGF1,MMP2,SPP1
6_Member	Reactome Gene Sets	R-HSA-1474228	Degradation of the extracellular matrix	-4.4495	-2.08119	4/140	1293,2335,4313,6696	COL6A3,FN1,MMP2,SPP1
6_Member	Canonical Pathways	M18	PID INTEGRIN1 PATHWAY	-4.03163	-1.79077	3/66	1293,2335,6696	COL6A3,FN1,SPP1
6_Member	Reactome Gene Sets	R-HSA-216083	Integrin cell surface interactions	-3.70505	-1.53017	3/85	1293,2335,6696	COL6A3,FN1,SPP1
6_Member	KEGG Pathway	hsa04512	ECM-receptor interaction	-3.66053	-1.49997	3/88	1293,2335,6696	COL6A3,FN1,SPP1
6_Member	Reactome Gene Sets	R-HSA-1474244	Extracellular matrix organization	-3.1762	-1.12259	4/301	1293,2335,4313,6696	COL6A3,FN1,MMP2,SPP1
6_Member	KEGG Pathway	hsa05165	Human papillomavirus infection	-3.02274	-1.00305	4/331	1293,1956,2335,6696	COL6A3,EGFR,FN1,SPP1
6_Member	GO Biological Processes	GO:0120035	regulation of plasma membrane bounded cell projection organization	-2.86924	-0.873352	5/625	688,1969,2335,5168,6696	KLF5,EPHA2,FN1,ENPP2,SPP1
6_Member	GO Biological Processes	GO:0031344	regulation of cell projection organization	-2.81791	-0.848235	5/642	688,1969,2335,5168,6696	KLF5,EPHA2,FN1,ENPP2,SPP1
6_Member	GO Biological Processes	GO:0060284	regulation of cell development	-2.37004	-0.475285	4/501	2335,3213,3479,6696	FN1,HOXB3,IGF1,SPP1
6_Member	Canonical Pathways	M5884	NABA CORE MATRISOME	-2.23996	-0.360239	3/275	1293,2335,6696	COL6A3,FN1,SPP1
7_Summary	GO Biological Processes	GO:0001503	ossification	-5.81466	-3.13869	6/273	1956,1969,3479,4313,6696,133522,2066,2335,4842,1545,5166,6495,1293,2674,5698,1436,3213,55124,2065	EGFR,EPHA2,IGF1,MMP2,SPP1,PPARGC1B,ERBB4,FN1,NOS1,CYP1B1,PDK4,SIX1,COL6A3,GFRA1,PSMB9,CSF1R,HOXB3,PIWIL2,ERBB3
7_Member	GO Biological Processes	GO:0001503	ossification	-5.81466	-3.13869	6/273	1956,1969,3479,4313,6696,133522	EGFR,EPHA2,IGF1,MMP2,SPP1,PPARGC1B
7_Member	WikiPathways	WP3680	Physico-chemical features and toxicity-associated pathways	-5.6944	-3.0453	4/68	1956,2066,2335,4842	EGFR,ERBB4,FN1,NOS1
7_Member	WikiPathways	WP3303	RAC1/PAK1/p38/MMP2 pathway	-5.66888	-3.03681	4/69	1956,2335,4313,4842	EGFR,FN1,MMP2,NOS1
7_Member	GO Biological Processes	GO:0034614	cellular response to reactive oxygen species	-4.74092	-2.30666	4/118	1545,1956,4313,133522	CYP1B1,EGFR,MMP2,PPARGC1B
7_Member	Canonical Pathways	M145	PID P53 DOWNSTREAM PATHWAY	-4.4863	-2.10672	4/137	1956,1969,4313,6696	EGFR,EPHA2,MMP2,SPP1
7_Member	GO Biological Processes	GO:0071396	cellular response to lipid	-4.30795	-1.98613	6/503	1545,1956,4313,5166,6696,133522	CYP1B1,EGFR,MMP2,PDK4,SPP1,PPARGC1B
7_Member	GO Biological Processes	GO:0071407	cellular response to organic cyclic compound	-4.2984	-1.98613	6/505	1545,1956,4313,6495,6696,133522	CYP1B1,EGFR,MMP2,SIX1,SPP1,PPARGC1B
7_Member	GO Biological Processes	GO:0000302	response to reactive oxygen species	-4.11142	-1.85326	4/171	1545,1956,4313,133522	CYP1B1,EGFR,MMP2,PPARGC1B
7_Member	Reactome Gene Sets	R-HSA-422475	Axon guidance	-4.0852	-1.83055	6/552	1293,1956,1969,2674,4313,5698	COL6A3,EGFR,EPHA2,GFRA1,MMP2,PSMB9
7_Member	Reactome Gene Sets	R-HSA-9675108	Nervous system development	-3.97979	-1.75557	6/577	1293,1956,1969,2674,4313,5698	COL6A3,EGFR,EPHA2,GFRA1,MMP2,PSMB9
7_Member	GO Biological Processes	GO:0071417	cellular response to organonitrogen compound	-3.96748	-1.74652	6/580	1545,1956,3479,4313,5166,6495	CYP1B1,EGFR,IGF1,MMP2,PDK4,SIX1
7_Member	GO Biological Processes	GO:0071230	cellular response to amino acid stimulus	-3.79923	-1.60345	3/79	1956,4313,6495	EGFR,MMP2,SIX1
7_Member	GO Biological Processes	GO:1901699	cellular response to nitrogen compound	-3.73519	-1.54848	6/640	1545,1956,3479,4313,5166,6495	CYP1B1,EGFR,IGF1,MMP2,PDK4,SIX1
7_Member	GO Biological Processes	GO:0034599	cellular response to oxidative stress	-3.69809	-1.52611	4/219	1545,1956,4313,133522	CYP1B1,EGFR,MMP2,PPARGC1B
7_Member	GO Biological Processes	GO:0071229	cellular response to acid chemical	-3.64603	-1.49936	3/89	1956,4313,6495	EGFR,MMP2,SIX1
7_Member	GO Biological Processes	GO:0048608	reproductive structure development	-3.63555	-1.4916	5/423	1545,1956,2674,4313,6696	CYP1B1,EGFR,GFRA1,MMP2,SPP1
7_Member	GO Biological Processes	GO:0061458	reproductive system development	-3.62139	-1.48432	5/426	1545,1956,2674,4313,6696	CYP1B1,EGFR,GFRA1,MMP2,SPP1
7_Member	GO Biological Processes	GO:0062197	cellular response to chemical stress	-3.37149	-1.2714	4/267	1545,1956,4313,133522	CYP1B1,EGFR,MMP2,PPARGC1B
7_Member	GO Biological Processes	GO:0043200	response to amino acid	-3.28644	-1.20554	3/118	1956,4313,6495	EGFR,MMP2,SIX1
7_Member	GO Biological Processes	GO:0032355	response to estradiol	-3.2339	-1.17139	3/123	1545,1956,4313	CYP1B1,EGFR,MMP2
7_Member	Reactome Gene Sets	R-HSA-9006931	Signaling by Nuclear Receptors	-3.18701	-1.1312	4/299	1956,2066,4313,5166	EGFR,ERBB4,MMP2,PDK4
7_Member	GO Biological Processes	GO:0001101	response to acid chemical	-3.13523	-1.09679	3/133	1956,4313,6495	EGFR,MMP2,SIX1
7_Member	GO Biological Processes	GO:0006979	response to oxidative stress	-2.86616	-0.8722	4/365	1545,1956,4313,133522	CYP1B1,EGFR,MMP2,PPARGC1B
7_Member	GO Biological Processes	GO:1901652	response to peptide	-2.56766	-0.633957	4/441	1545,3479,4313,5166	CYP1B1,IGF1,MMP2,PDK4
7_Member	GO Biological Processes	GO:0008406	gonad development	-2.51012	-0.591804	3/220	1545,2674,4313	CYP1B1,GFRA1,MMP2
7_Member	Reactome Gene Sets	R-HSA-8939211	ESR-mediated signaling	-2.49358	-0.578482	3/223	1956,2066,4313	EGFR,ERBB4,MMP2
7_Member	GO Biological Processes	GO:0045137	development of primary sexual characteristics	-2.48269	-0.570782	3/225	1545,2674,4313	CYP1B1,GFRA1,MMP2
7_Member	GO Biological Processes	GO:0060322	head development	-2.43053	-0.529621	5/789	1436,1956,2066,3213,4313	CSF1R,EGFR,ERBB4,HOXB3,MMP2
7_Member	GO Biological Processes	GO:0048511	rhythmic process	-2.27992	-0.397231	3/266	1545,4313,55124	CYP1B1,MMP2,PIWIL2
7_Member	GO Biological Processes	GO:0007548	sex differentiation	-2.23561	-0.357362	3/276	1545,2674,4313	CYP1B1,GFRA1,MMP2
7_Member	GO Biological Processes	GO:0007162	negative regulation of cell adhesion	-2.11644	-0.248378	3/305	1545,2065,4313	CYP1B1,ERBB3,MMP2
7_Member	GO Biological Processes	GO:1901653	cellular response to peptide	-2.11644	-0.248378	3/305	1545,3479,5166	CYP1B1,IGF1,PDK4
8_Summary	GO Biological Processes	GO:0031099	regeneration	-5.80547	-3.13864	5/149	688,2066,3479,4313,5774,4842,6495,2246,5166,27122,1293,27165	KLF5,ERBB4,IGF1,MMP2,PTPN3,NOS1,SIX1,FGF1,PDK4,DKK3,COL6A3,GLS2
8_Member	GO Biological Processes	GO:0031099	regeneration	-5.80547	-3.13864	5/149	688,2066,3479,4313,5774	KLF5,ERBB4,IGF1,MMP2,PTPN3
8_Member	GO Biological Processes	GO:0014902	myotube differentiation	-5.66888	-3.03681	4/69	688,3479,4842,6495	KLF5,IGF1,NOS1,SIX1
8_Member	GO Biological Processes	GO:0042246	tissue regeneration	-4.17732	-1.90843	3/59	688,2066,3479	KLF5,ERBB4,IGF1
8_Member	GO Biological Processes	GO:0062012	regulation of small molecule metabolic process	-4.04777	-1.79661	5/345	2246,3479,4842,5166,27122	FGF1,IGF1,NOS1,PDK4,DKK3
8_Member	GO Biological Processes	GO:0051146	striated muscle cell differentiation	-3.87426	-1.66291	4/197	688,3479,4842,6495	KLF5,IGF1,NOS1,SIX1
8_Member	GO Biological Processes	GO:1900542	regulation of purine nucleotide metabolic process	-3.64603	-1.49936	3/89	3479,4842,5166	IGF1,NOS1,PDK4
8_Member	GO Biological Processes	GO:0006140	regulation of nucleotide metabolic process	-3.61755	-1.48432	3/91	3479,4842,5166	IGF1,NOS1,PDK4
8_Member	GO Biological Processes	GO:0009408	response to heat	-3.52274	-1.40255	3/98	2246,3479,4842	FGF1,IGF1,NOS1
8_Member	GO Biological Processes	GO:0042692	muscle cell differentiation	-3.40873	-1.30369	4/261	688,3479,4842,6495	KLF5,IGF1,NOS1,SIX1
8_Member	GO Biological Processes	GO:0061061	muscle structure development	-3.36732	-1.26967	5/484	688,1293,3479,4842,6495	KLF5,COL6A3,IGF1,NOS1,SIX1
8_Member	GO Biological Processes	GO:0007517	muscle organ development	-3.21993	-1.15966	4/293	688,1293,3479,6495	KLF5,COL6A3,IGF1,SIX1
8_Member	WikiPathways	WP5083	Neuroinflammation and glutamatergic signaling	-3.03531	-1.01152	3/144	3479,4842,27165	IGF1,NOS1,GLS2
8_Member	GO Biological Processes	GO:0062013	positive regulation of small molecule metabolic process	-2.99252	-0.980906	3/149	2246,3479,4842	FGF1,IGF1,NOS1
8_Member	GO Biological Processes	GO:0009266	response to temperature stimulus	-2.83531	-0.85464	3/169	2246,3479,4842	FGF1,IGF1,NOS1
8_Member	GO Biological Processes	GO:0040007	growth	-2.83164	-0.85464	4/373	688,2066,2246,3479	KLF5,ERBB4,FGF1,IGF1
8_Member	GO Biological Processes	GO:0048589	developmental growth	-2.83164	-0.85464	4/373	688,2066,2246,3479	KLF5,ERBB4,FGF1,IGF1
9_Summary	WikiPathways	WP4673	Male infertility	-5.72111	-3.06324	5/155	1191,4313,4842,5243,55124,1545,3479,5774	CLU,MMP2,NOS1,ABCB1,PIWIL2,CYP1B1,IGF1,PTPN3
9_Member	WikiPathways	WP4673	Male infertility	-5.72111	-3.06324	5/155	1191,4313,4842,5243,55124	CLU,MMP2,NOS1,ABCB1,PIWIL2
9_Member	GO Biological Processes	GO:0009410	response to xenobiotic stimulus	-2.71695	-0.76333	4/401	1545,4313,4842,5243	CYP1B1,MMP2,NOS1,ABCB1
9_Member	GO Biological Processes	GO:0034764	positive regulation of transmembrane transport	-2.46655	-0.557807	3/228	3479,4842,5243	IGF1,NOS1,ABCB1
9_Member	GO Biological Processes	GO:0032412	regulation of ion transmembrane transporter activity	-2.23996	-0.360239	3/275	4842,5243,5774	NOS1,ABCB1,PTPN3
9_Member	GO Biological Processes	GO:0022898	regulation of transmembrane transporter activity	-2.19721	-0.320431	3/285	4842,5243,5774	NOS1,ABCB1,PTPN3
9_Member	GO Biological Processes	GO:0034762	regulation of transmembrane transport	-2.09163	-0.226428	4/602	3479,4842,5243,5774	IGF1,NOS1,ABCB1,PTPN3
9_Member	GO Biological Processes	GO:0032409	regulation of transporter activity	-2.05961	-0.20009	3/320	4842,5243,5774	NOS1,ABCB1,PTPN3
10_Summary	GO Biological Processes	GO:0001655	urogenital system development	-5.31039	-2.75471	6/334	59,2066,2246,2674,4313,6495,2065,2335,3479,6696,1956,1545,1436,1828	ACTA2,ERBB4,FGF1,GFRA1,MMP2,SIX1,ERBB3,FN1,IGF1,SPP1,EGFR,CYP1B1,CSF1R,DSG1
10_Member	GO Biological Processes	GO:0001655	urogenital system development	-5.31039	-2.75471	6/334	59,2066,2246,2674,4313,6495	ACTA2,ERBB4,FGF1,GFRA1,MMP2,SIX1
10_Member	GO Biological Processes	GO:0060485	mesenchyme development	-4.87724	-2.42127	5/231	59,2065,2066,2335,6495	ACTA2,ERBB3,ERBB4,FN1,SIX1
10_Member	GO Biological Processes	GO:0072006	nephron development	-4.60198	-2.19343	4/128	59,2066,2246,6495	ACTA2,ERBB4,FGF1,SIX1
10_Member	GO Biological Processes	GO:0001822	kidney development	-4.42568	-2.06438	5/287	59,2066,2246,2674,6495	ACTA2,ERBB4,FGF1,GFRA1,SIX1
10_Member	GO Biological Processes	GO:0072001	renal system development	-4.36195	-2.01748	5/296	59,2066,2246,2674,6495	ACTA2,ERBB4,FGF1,GFRA1,SIX1
10_Member	GO Biological Processes	GO:0048638	regulation of developmental growth	-4.14479	-1.8795	5/329	2066,2335,3479,6495,6696	ERBB4,FN1,IGF1,SIX1,SPP1
10_Member	GO Biological Processes	GO:0072028	nephron morphogenesis	-4.01213	-1.778	3/67	2066,2246,6495	ERBB4,FGF1,SIX1
10_Member	GO Biological Processes	GO:0060993	kidney morphogenesis	-3.72026	-1.53951	3/84	2066,2246,6495	ERBB4,FGF1,SIX1
10_Member	GO Biological Processes	GO:0040008	regulation of growth	-3.649	-1.49936	6/664	1956,2066,2335,3479,6495,6696	EGFR,ERBB4,FN1,IGF1,SIX1,SPP1
10_Member	GO Biological Processes	GO:0014033	neural crest cell differentiation	-3.5897	-1.46174	3/93	2066,2335,6495	ERBB4,FN1,SIX1
10_Member	GO Biological Processes	GO:0007507	heart development	-3.14852	-1.10364	5/541	2065,2066,2335,4313,6495	ERBB3,ERBB4,FN1,MMP2,SIX1
10_Member	GO Biological Processes	GO:0048863	stem cell differentiation	-2.91918	-0.913527	3/158	2066,2335,6495	ERBB4,FN1,SIX1
10_Member	GO Biological Processes	GO:0048762	mesenchymal cell differentiation	-2.84269	-0.85635	3/168	2066,2335,6495	ERBB4,FN1,SIX1
10_Member	GO Biological Processes	GO:0001667	ameboidal-type cell migration	-2.72313	-0.767757	3/185	1545,2066,2335	CYP1B1,ERBB4,FN1
10_Member	GO Biological Processes	GO:0034330	cell junction organization	-2.43924	-0.53677	4/479	1436,1828,2066,2335	CSF1R,DSG1,ERBB4,FN1
10_Member	GO Biological Processes	GO:0034329	cell junction assembly	-2.29815	-0.412481	3/262	1828,2066,2335	DSG1,ERBB4,FN1
11_Summary	WikiPathways	WP2840	Hair follicle development: cytodifferentiation - part 3 of 3	-5.22625	-2.69772	4/89	1828,1956,3479,27122,1191,2335,10257,4842	DSG1,EGFR,IGF1,DKK3,CLU,FN1,ABCC4,NOS1
11_Member	WikiPathways	WP2840	Hair follicle development: cytodifferentiation - part 3 of 3	-5.22625	-2.69772	4/89	1828,1956,3479,27122	DSG1,EGFR,IGF1,DKK3
11_Member	Reactome Gene Sets	R-HSA-114608	Platelet degranulation	-4.58872	-2.19004	4/129	1191,2335,3479,10257	CLU,FN1,IGF1,ABCC4
11_Member	Reactome Gene Sets	R-HSA-76005	Response to elevated platelet cytosolic Ca2+	-4.52396	-2.13968	4/134	1191,2335,3479,10257	CLU,FN1,IGF1,ABCC4
11_Member	Reactome Gene Sets	R-HSA-76002	Platelet activation, signaling and aggregation	-3.39621	-1.29366	4/263	1191,2335,3479,10257	CLU,FN1,IGF1,ABCC4
11_Member	Reactome Gene Sets	R-HSA-109582	Hemostasis	-2.88155	-0.883728	5/621	1191,2335,3479,4842,10257	CLU,FN1,IGF1,NOS1,ABCC4
11_Member	GO Biological Processes	GO:0050821	protein stabilization	-2.55544	-0.625669	3/212	1191,1828,3479	CLU,DSG1,IGF1
11_Member	GO Biological Processes	GO:0031647	regulation of protein stability	-2.05593	-0.197814	3/321	1191,1828,3479	CLU,DSG1,IGF1
12_Summary	GO Biological Processes	GO:0030855	epithelial cell differentiation	-5.01932	-2.52858	7/576	59,688,1969,2066,2195,5493,6495	ACTA2,KLF5,EPHA2,ERBB4,FAT1,PPL,SIX1
12_Member	GO Biological Processes	GO:0030855	epithelial cell differentiation	-5.01932	-2.52858	7/576	59,688,1969,2066,2195,5493,6495	ACTA2,KLF5,EPHA2,ERBB4,FAT1,PPL,SIX1
12_Member	GO Biological Processes	GO:0002064	epithelial cell development	-4.03461	-1.79077	4/179	59,688,1969,2195	ACTA2,KLF5,EPHA2,FAT1
13_Summary	GO Biological Processes	GO:0009611	response to wounding	-4.65985	-2.2375	6/435	2065,2246,2335,3479,4313,5493,5733,6696	ERBB3,FGF1,FN1,IGF1,MMP2,PPL,PTGER3,SPP1
13_Member	GO Biological Processes	GO:0009611	response to wounding	-4.65985	-2.2375	6/435	2065,2246,2335,3479,4313,5493	ERBB3,FGF1,FN1,IGF1,MMP2,PPL
13_Member	GO Biological Processes	GO:0042060	wound healing	-4.13858	-1.87687	5/330	2065,2246,2335,3479,5493	ERBB3,FGF1,FN1,IGF1,PPL
13_Member	GO Biological Processes	GO:0051046	regulation of secretion	-2.07192	-0.210985	4/610	2065,3479,5733,6696	ERBB3,IGF1,PTGER3,SPP1
14_Summary	GO Biological Processes	GO:0035270	endocrine system development	-4.65615	-2.2375	4/124	1545,3213,6495,27122,2065,1191	CYP1B1,HOXB3,SIX1,DKK3,ERBB3,CLU
14_Member	GO Biological Processes	GO:0035270	endocrine system development	-4.65615	-2.2375	4/124	1545,3213,6495,27122	CYP1B1,HOXB3,SIX1,DKK3
14_Member	GO Biological Processes	GO:0021545	cranial nerve development	-4.29281	-1.98613	3/54	2065,3213,6495	ERBB3,HOXB3,SIX1
14_Member	GO Biological Processes	GO:0021675	nerve development	-3.76704	-1.5743	3/81	2065,3213,6495	ERBB3,HOXB3,SIX1
14_Member	GO Biological Processes	GO:1901214	regulation of neuron death	-2.08198	-0.218211	3/314	1191,2065,6495	CLU,ERBB3,SIX1
15_Summary	KEGG Pathway	hsa04926	Relaxin signaling pathway	-4.58872	-2.19004	4/129	59,1956,4313,4842,2335,6696,3479,5733	ACTA2,EGFR,MMP2,NOS1,FN1,SPP1,IGF1,PTGER3
15_Member	KEGG Pathway	hsa04926	Relaxin signaling pathway	-4.58872	-2.19004	4/129	59,1956,4313,4842	ACTA2,EGFR,MMP2,NOS1
15_Member	WikiPathways	WP5097	CCL18 signaling pathway	-4.24533	-1.95796	3/56	59,2335,4313	ACTA2,FN1,MMP2
15_Member	GO Biological Processes	GO:0090066	regulation of anatomical structure size	-3.32293	-1.23493	5/495	59,2335,4313,4842,6696	ACTA2,FN1,MMP2,NOS1,SPP1
15_Member	WikiPathways	WP4754	IL-18 signaling pathway	-3.29965	-1.2164	4/279	59,2335,4313,6696	ACTA2,FN1,MMP2,SPP1
15_Member	GO Biological Processes	GO:0003012	muscle system process	-3.28221	-1.20365	4/282	59,3479,4842,5733	ACTA2,IGF1,NOS1,PTGER3
15_Member	KEGG Pathway	hsa04371	Apelin signaling pathway	-3.0797	-1.04549	3/139	59,4842,6696	ACTA2,NOS1,SPP1
15_Member	GO Biological Processes	GO:0035296	regulation of tube diameter	-3.06174	-1.03382	3/141	59,4313,4842	ACTA2,MMP2,NOS1
15_Member	GO Biological Processes	GO:0097746	blood vessel diameter maintenance	-3.06174	-1.03382	3/141	59,4313,4842	ACTA2,MMP2,NOS1
15_Member	GO Biological Processes	GO:0035150	regulation of tube size	-3.05287	-1.02701	3/142	59,4313,4842	ACTA2,MMP2,NOS1
15_Member	GO Biological Processes	GO:0006936	muscle contraction	-2.46655	-0.557807	3/228	59,4842,5733	ACTA2,NOS1,PTGER3
15_Member	GO Biological Processes	GO:0044057	regulation of system process	-2.13968	-0.267278	4/583	3479,4313,4842,5733	IGF1,MMP2,NOS1,PTGER3
16_Summary	WikiPathways	WP98	Prostaglandin synthesis and regulation	-4.53176	-2.14273	3/45	5733,10257,133522	PTGER3,ABCC4,PPARGC1B
16_Member	WikiPathways	WP98	Prostaglandin synthesis and regulation	-4.53176	-2.14273	3/45	5733,10257,133522	PTGER3,ABCC4,PPARGC1B
17_Summary	GO Biological Processes	GO:0006954	inflammatory response	-4.21427	-1.93808	6/523	1191,1436,1969,2335,5733,6696,1956,2195,3479,5243,4313,5698,5168	CLU,CSF1R,EPHA2,FN1,PTGER3,SPP1,EGFR,FAT1,IGF1,ABCB1,MMP2,PSMB9,ENPP2
17_Member	GO Biological Processes	GO:0006954	inflammatory response	-4.21427	-1.93808	6/523	1191,1436,1969,2335,5733,6696	CLU,CSF1R,EPHA2,FN1,PTGER3,SPP1
17_Member	GO Biological Processes	GO:0000902	cell morphogenesis	-3.628	-1.48675	6/670	1191,1436,1956,1969,2195,2335	CLU,CSF1R,EGFR,EPHA2,FAT1,FN1
17_Member	GO Biological Processes	GO:0008283	cell population proliferation	-3.33493	-1.24213	5/492	1191,1436,1969,3479,5243	CLU,CSF1R,EPHA2,IGF1,ABCB1
17_Member	Reactome Gene Sets	R-HSA-449147	Signaling by Interleukins	-2.49522	-0.578509	4/462	1436,2335,4313,5698	CSF1R,FN1,MMP2,PSMB9
17_Member	GO Biological Processes	GO:0000904	cell morphogenesis involved in differentiation	-2.30713	-0.418453	4/522	1436,1969,2195,2335	CSF1R,EPHA2,FAT1,FN1
17_Member	GO Biological Processes	GO:0022604	regulation of cell morphogenesis	-2.11256	-0.24593	3/306	1436,2335,5168	CSF1R,FN1,ENPP2
18_Summary	GO Biological Processes	GO:0045765	regulation of angiogenesis	-4.03598	-1.79077	5/347	1545,1969,2246,5168,10769	CYP1B1,EPHA2,FGF1,ENPP2,PLK2
18_Member	GO Biological Processes	GO:0045765	regulation of angiogenesis	-4.03598	-1.79077	5/347	1545,1969,2246,5168,10769	CYP1B1,EPHA2,FGF1,ENPP2,PLK2
18_Member	GO Biological Processes	GO:1901342	regulation of vasculature development	-4.00106	-1.77356	5/353	1545,1969,2246,5168,10769	CYP1B1,EPHA2,FGF1,ENPP2,PLK2
18_Member	GO Biological Processes	GO:0010632	regulation of epithelial cell migration	-3.23666	-1.17139	4/290	1969,2246,5168,10769	EPHA2,FGF1,ENPP2,PLK2
18_Member	GO Biological Processes	GO:0010634	positive regulation of epithelial cell migration	-2.79908	-0.83303	3/174	2246,5168,10769	FGF1,ENPP2,PLK2
18_Member	GO Biological Processes	GO:0010594	regulation of endothelial cell migration	-2.45591	-0.550317	3/230	1969,2246,10769	EPHA2,FGF1,PLK2
19_Summary	GO Biological Processes	GO:0006304	DNA modification	-3.5897	-1.46174	3/93	1545,8493,55124,1191,3479,5166	CYP1B1,PPM1D,PIWIL2,CLU,IGF1,PDK4
19_Member	GO Biological Processes	GO:0006304	DNA modification	-3.5897	-1.46174	3/93	1545,8493,55124	CYP1B1,PPM1D,PIWIL2
19_Member	GO Biological Processes	GO:0034248	regulation of cellular amide metabolic process	-3.16301	-1.11379	5/537	1191,1545,3479,5166,55124	CLU,CYP1B1,IGF1,PDK4,PIWIL2
19_Member	GO Biological Processes	GO:0034250	positive regulation of cellular amide metabolic process	-2.85012	-0.859985	3/167	1191,1545,55124	CLU,CYP1B1,PIWIL2
20_Summary	GO Biological Processes	GO:0034308	primary alcohol metabolic process	-3.56248	-1.43712	3/95	1545,3479,57016,5168,6696,10351,5243,27122	CYP1B1,IGF1,AKR1B10,ENPP2,SPP1,ABCA8,ABCB1,DKK3
20_Member	GO Biological Processes	GO:0034308	primary alcohol metabolic process	-3.56248	-1.43712	3/95	1545,3479,57016	CYP1B1,IGF1,AKR1B10
20_Member	GO Biological Processes	GO:0016042	lipid catabolic process	-3.27644	-1.20021	4/283	1545,5168,6696,57016	CYP1B1,ENPP2,SPP1,AKR1B10
20_Member	GO Biological Processes	GO:0034754	cellular hormone metabolic process	-3.20344	-1.1454	3/126	1545,6696,57016	CYP1B1,SPP1,AKR1B10
20_Member	GO Biological Processes	GO:0044242	cellular lipid catabolic process	-2.6967	-0.746566	3/189	1545,5168,57016	CYP1B1,ENPP2,AKR1B10
20_Member	GO Biological Processes	GO:0042445	hormone metabolic process	-2.63314	-0.693308	3/199	1545,6696,57016	CYP1B1,SPP1,AKR1B10
20_Member	GO Biological Processes	GO:0006643	membrane lipid metabolic process	-2.60867	-0.670528	3/203	1545,5168,10351	CYP1B1,ENPP2,ABCA8
20_Member	GO Biological Processes	GO:0009636	response to toxic substance	-2.46121	-0.554052	3/229	1545,5243,57016	CYP1B1,ABCB1,AKR1B10
20_Member	GO Biological Processes	GO:0010817	regulation of hormone levels	-2.37927	-0.481447	4/498	1545,6696,27122,57016	CYP1B1,SPP1,DKK3,AKR1B10
20_Member	GO Biological Processes	GO:0006066	alcohol metabolic process	-2.07447	-0.212123	3/316	1545,3479,57016	CYP1B1,IGF1,AKR1B10
