# Supplementary material for: Early Mechanisms of Chemoresistance in Retinoblastoma
Source: Cancers (Basel). 2022 Oct 10;14(19):4966. doi: 10.3390/cancers14194966 (PMC9563111; doi:10.3390/cancers14194966)
Supplement: Supplementary file 1 [file cancers-14-04966-s001.zip › Table S5_qPCRoligos.xlsx]

## Sheet: Sheet1
Primers	Sequence
18S-F	CATGGCCGTTCTTAGTTGGT
18S-R	CGCTGAGCCAGTCAGTGTAG
SAP130-F	GAGGCCAGTTTCTGCAGTTC
SAP130-R	GCACCAGGTGGTAGGTCACT
RBM23-F	ATGTCGACGATCCCAGCTAC
RBM23-R	CTGCAGTGCTGCTTTTCTTG
ABCB1-F	CCCATCATTGCAATAGCAGG
ABCB1-R	GTTCAAACTTCTGCTCCTGA
ABCC3-F	CCTTTGCCAACTTTCTCTGC
ABCC3-R	AGGGCACTCAGCTGTCTCAT
